# Supplementary material for: Cross-species analysis defines the conservation of anatomically segregated VMH neuron populations
Source: eLife. 2021 May 21;10:e69065. doi: 10.7554/eLife.69065 (PMC8184210; doi:10.7554/eLife.69065)
Supplement: Source data 1. [file elife-69065-data1.csv]

Gene	Esr1_1	Esr1_2	Esr1_3	Dlk1_1	Dlk1_2	Fezf1_1	Fezf1_2	Lepr_1	Lepr_2	Lepr_3	Nfib_1	Nfib_2	Foxp2_1	Foxp2_2	Doublets_1	Doublets_2	Doublets_3
Phka2	0	0	0	0.29	0	0	0.15	0	0	0	0	0	0	0.01	0	0	0.08
Kif13a	0	0	0	0	0	0	0	0.04	0.33	0.41	0.29	0.35	0.1	0	0	0	0
Herc2	0	0	0	0	0	0.1	0	0	0	0.05	0	0	0	0	0	0	0
Fam214a	0	0	0	0	0	0	0	0	0	0	0	0.19	0	0	0	0	0
Plxna2	0.37	0	0.43	0	0	0	0.1	0	0	0	0.01	0	0	0	0	0	0
Usp13	0	0	0	0	0	0	0	0	0	0	0	0.05	0.01	0	0	0	0
Jakmip2	0	0	0	0.05	0	0.11	0	0	0.06	0.15	0	0.08	0.11	0	0	0	0.18
Xpr1	0	0	0	0	0	0	0	0	0	0	0.15	0.17	0.09	0	0	0.19	0
Adcy1	0	0	0	0	0	0	0	0	0.16	0.4	0.77	0.45	0.73	0.57	0.82	0	0
Echdc3	0	0.14	0.12	0	0	0.23	0	0	0	0	0	0	0	0	0	0	0
Acer2	0.12	0.28	0.42	0	0	0.27	0	0	0	0	0	0	0	0	0	0	0
Relt	0.06	0	0	0.18	0	0	0.38	0	0.07	0	0.42	0	0	0	0.29	0	0
Ptger4	0.77	0.17	0.2	0.14	0.85	0	0	0	0	0	0	0	0	0	0	0	0
Klf3	0	0	0	0	0	0	0	0	0.43	0	0	0	0	0	0	0.01	0
Lrrc8b	0	0	0	0	0	0	0	0	0.35	0.16	0.12	0.03	0.28	0.23	0	0.01	0
Wdr54	0	0	0.12	0	0	0	0	0	0	0	0	0	0	0	0	0	0
Masp1	0.08	0.56	0.62	0	0	0	0	0	0	0	0.18	0	0	0	0.02	0	0
Pdzrn4	0.16	0	0	0.62	0	0	0.94	0	0	0	0	0.09	0	0	0	0.29	0
Hacd2	0	0	0	0	0	0	0	0	0	0	0	0	0	0.1	0	0	0
Gipr	0	0.01	0	0	0.95	0	0	0.41	0.06	0	0	0.04	0	0	0	0.29	0
Ttc34	0.9	0	0	0.61	0	0	0	0	0	0	0	0.62	0	0	0	0	0.82
Sez6l	0.11	0.04	0	0	0	0.14	0.16	0.16	0.14	0.22	0.14	0	0	0	0	0.02	0
Radil	0.02	0.01	0	0	0	0	0	0	0	0	0	0	0.12	0.1	0	0	0
Tmem181a	0	0	0	0	0	0.07	0	0	0	0	0	0	0	0	0	0	0
Stt3b	0	0	0	0	0	0.01	0	0	0.15	0	0.07	0	0	0	0	0	0
Tdrd3	0	0	0	0	0	0	0	0	0	0	0	0.12	0.09	0	0	0	0
Hmcn2	0	0.84	0.04	0	0.02	0.01	0	0	0	0	0	0	0	0	0	0	0
Suco	0	0.12	0.1	0	0	0.15	0	0	0	0	0	0	0	0	0	0	0
Anxa11	0	0.69	0.42	0.02	0	0.35	0.47	0	0	0	0	0	0	0	0	0	0
Fads1	0.14	0	0.18	0.02	0	0	0	0	0	0	0	0	0	0	0	0	0
Nedd4	0	0	0	0	0	0	0	0	0.4	0	0	0	0	0	0	0.15	0
Mbip	0	0.08	0	0.04	0	0	0.03	0	0	0	0	0	0	0	0	0	0
Cmtm6	0	0	0	0	0	0	0	0	0	0	0	0	0	0	0.22	0.25	0
Asap1	0	0	0.01	0	0	0	0	0	0	0	0	0.15	0	0.12	0	0	0
Mgat5	0	0	0	0	0	0.04	0	0	0	0	0	0.02	0	0	0	0.09	0
Gadd45b	0.39	0.61	0.64	0.09	0	0	0	0	0	0	0	0	0	0	0	0	0
Ngef	0	0.09	0	0.08	0	0	0	0	0	0	0	0	0.02	0	0	0	0
Slc15a2	0	0	0.22	0	0.56	0	0	0	0	0	0	0.17	0	0	0	0.64	0.51
Fbn1	0.41	0	0	0	0	0	0	0	0	0	0.91	0.79	0.12	0	0	0	0
Elavl4	0	0	0	0.1	0	0	0	0	0	0	0	0.25	0	0	0	0	0
Wwc1	0.09	0.06	0	0.01	0	0	0.04	0	0	0	0	0	0	0	0	0	0
Ppt2	0	0	0	0	0.29	0	0.15	0	0	0	0	0	0	0	0	0	0.09
Trio	0	0.22	0.2	0	0	0.2	0.09	0	0.04	0	0.11	0	0	0	0	0.06	0
Adcyap1	0	0.34	0.32	0	0	0	0	0.01	0	0	0	0	0.09	0.04	0	0	0
Htr4	0	0.11	0.2	0.11	0.1	0.31	0.58	0	0	0	0	0	0	0	0.27	0.1	0.09
Bmp4	0	0.67	0.88	0.45	0	0	0	0	0	0	0	0	0	0	0	0.02	0
Grin2a	0.42	0	0	0.18	0	0	0	0	0	0	0.57	0	0	0	0	0.12	0
Mfsd2b	0	0	0	0	0	0	0	0.27	0.68	0.33	0	0.21	0	0	0	0	0.72
Klhl3	0.19	0.18	0.43	0	0	0	0	0	0	0	0	0	0	0	0	0	0
Hmgcll1	0.09	0	0	0.14	0	0	0	0	0	0	0	0	0	0	0	0	0
Prkcb	0.35	0	0.13	0	0	0	0	0	0	0	0	0	0	0.21	0	0.13	0
Arhgef12	0	0.01	0	0	0	0	0	0	0	0	0	0	0	0	0	0	0.05
Dok7	0.43	0	0	0.42	0	0	0.69	0	0	0	0	0	0	0.92	0	0	0.01
Itm2b	0	0	0	0	0	0	0	0	0	0	0.08	0.13	0.07	0	0	0	0
Pld2	0.21	0.41	0	0.02	0.59	0	0	0	0	0	0	0	0.67	0	0	0	0
Csde1	0	0	0.33	0	0	0	0	0	0	0	0	0	0	0	0	0	0
Pex14	0.02	0	0	0	0	0	0	0	0	0	0	0	0	0.07	0	0	0
Cpeb2	0	0.03	0.12	0.02	0	0.08	0	0	0	0	0	0	0	0	0	0	0
Nfia	0	0	0	0	0	0	0	0	0	0	0.89	0.15	0.3	0	0.34	0	0
Tmem80	0.1	0.05	0.04	0.15	0	0	0.04	0	0	0	0	0	0	0	0	0	0
Srpk2	0	0	0	0	0	0.12	0	0	0.09	0.18	0.16	0.13	0	0	0.06	0	0
Spatc1l	0.93	0.47	0.25	0	0	0	0	0	0	0	0	0	0	0	0	0	0
Laptm5	0	0.06	0	0	0.09	0.35	0	0	0.2	0.21	0	0	0	0	0	0	0
Il5ra	0	0.59	0.11	0	0.24	0.24	0	0	0	0	0	0	0	0	0	0	0.05
Tomm40	0	0.01	0.04	0.2	0.5	0	0.01	0	0	0	0	0	0	0	0	0.11	0
Sgip1	0.09	0.17	0	0.15	0	0.12	0.17	0	0	0	0	0	0.19	0.09	0	0.12	0
Prkch	0.63	0.54	0.37	0.9	0	0	0.54	0	0	0	0	0	0	0	0	0	0
Mxi1	0	0	0	0	0	0	0	0	0	0	0.03	0.25	0.07	0	0	0	0
Mical2	0	0.02	0	0	0	0.16	0	0	0	0	0.06	0	0	0	0	0	0
Sorcs1	0	0.6	0	0	0	0.61	0	0	0	0.29	0	0	0	0	0	0	0
Ubxn4	0	0	0	0	0	0	0	0	0	0	0	0	0	0	0	0	0
Ptprn	0	0	0	0	0	0	0	0	0	0	0	0	0	0	0	0.14	0
Cnot4	0.03	0	0	0.11	0	0	0.15	0	0	0	0	0	0	0	0	0	0.09
Nanos3	0.65	0.19	0.37	0	0.71	0	0	0	0	0	0	0	0	0	0	0	0
Carmil1	0	0.18	0.18	0.05	0	0.09	0	0	0	0.19	0	0	0	0	0	0	0
Neto1	0.22	0.22	0	0.21	0	0.22	0.08	0	0	0	0.33	0	0	0.32	0	0.79	0
Sybu	0.03	0.21	0.09	0.09	0	0.13	0.09	0	0.09	0	0	0	0.14	0.1	0	0	0
Tpbg	0.55	0	0	0.12	0	0	0.15	0	0	0	0	0	0.49	0.53	0.93	0.04	0
Snx30	0.04	0.03	0	0	0	0	0	0	0	0	0	0	0	0	0	0	0
Rcl1	0	0	0	0	0	0	0	0	0.15	0.25	0.03	0.48	0.04	0	0	0	0
Rgs14	0	0	0.16	0	0	0.1	0	0	0.18	0.4	0	0	0	0	0	0	0
Mta3	0	0	0.03	0	0	0	0	0	0	0	0	0.06	0	0	0	0	0.11
AI661453	0	0.53	0	0	0.5	0	0	0	0	0	0	0	0.28	0.6	0	0	0
Slc38a4	0	0.61	0.98	0	0	0	0	0.48	0	0	0	0	0	0	0	0	0
Shank3	0	0.04	0	0	0	0	0	0	0	0	0	0	0	0	0	0	0
Lhfp	0.86	0.91	0.92	0	0	0	0	0	0	0	0	0	0	0	0	0	0
Galnt12	0.12	0	0	0	0	0	0	0	0.04	0	0	0	0	0	0	0	0
Ggh	0.2	0.17	0.03	0	0	0	0.08	0	0	0	0	0	0	0	0	0	0
Slc12a8	0.65	0.65	0.8	0	0	0	0	0	0	0	0	0	0	0	0	0	0
Pfkfb4	0	0	0	0.27	0	0	0	0	0	0	0	0	0	0	0	0	0.15
Dock5	0	0	0	0	0	0	0	0.46	0.94	0.91	0	0	0	0	0	0	0.05
Atp8a2	0	0.03	0	0	0	0.1	0.17	0	0.14	0.15	0.1	0.13	0.1	0.2	0	0	0
Lin7a	0.43	0	0.16	0.03	0	0	0.03	0	0	0	0	0	0	0	0	0	0
Ino80c	0	0	0	0	0	0	0	0	0.07	0	0	0	0	0	0	0	0
Dgkk	0	0.24	0	0	0	0.6	0	0	0.22	0.82	0	0	0	0	0	0.11	0
Dock10	0.12	0	0.51	0	0	0	0	0	0.11	0	0	0	0	0	0	0	0
Galnt18	0	0	0	0	0	0	0	0	0	0	0.37	0.05	0.08	0	0	0	0
Sox9	0	0	0	0	0	0	0	0.05	0.31	0	0.58	0.43	0.53	0.03	0	0.07	0
Myo5c	0	0	0	0	0	0	0	0	0.76	0.83	0	0	0	0	0	0	0
Aven	0	0	0	0	0	0	0	0.19	0.43	0.18	0	0	0	0	0	0	0
Tom1l1	0.09	0	0	0	0	0	0	0	0	0.08	0	0	0	0	0	0	0.07
Dync1i2	0.15	0.1	0.29	0	0	0.13	0	0	0	0.19	0	0	0	0	0	0	0
Cdk5rap3	0	0.16	0.03	0.05	0	0	0	0	0	0	0	0	0	0	0	0	0
Phf21b	0	0.1	0	0	0	0.33	0	0	0.34	0.23	0.68	0.52	0	0	0	0	0
Wnt2	0	0.77	0.99	0.63	0	0	0.16	0	0	0	0	0	0	0	0	0	0
Lin28b	0.23	0	0.5	0.19	0	0	0	0	0	0	0	0	0	0	0	0	0
Nnmt	0.01	0.85	0.93	0	0	0.09	0	0	0	0	0	0	0	0	0	0	0
Arap2	0.08	0	0	0.41	0	0	0.16	0	0	0	0	0	0.33	0.35	0	0.25	0
Tmem246	0	0.11	0	0	0	0	0	0	0	0	0	0	0	0.03	0	0	0
D16Ertd472e	0.25	0.23	0.31	0	0	0	0	0	0.05	0	0	0	0.78	0.01	0	0	0
Pgd	0	0.25	0.21	0	0	0.04	0	0	0.02	0	0	0	0	0	0	0	0
Glcci1	0	0	0	0	0	0	0	0	0	0	0.02	0.48	0	0	0	0	0
Sipa1l2	0.27	0.03	0.68	0.23	0	0	0	0	0	0	0	0	0.14	0.4	0	0	0
Hebp1	0	0	0	0	0	0	0.05	0	0.12	0.21	0	0	0.29	0.02	0	0	0
Jcad	0.25	0	0	0	0	0	0.67	0	0.37	0	0	0	0	0	0.27	0	0.26
Ffar4	0	0.11	0.23	0	0	0	0	0	0.67	0.08	0	0	0	0	0	0.33	0
Pid1	0.07	0	0	0.46	0	0	0.46	0.01	0	0	0	0	0	0	0	0	0
Rffl	0	0	0.01	0.16	0	0	0	0	0	0	0	0	0.01	0	0	0	0
Nedd4l	0.23	0.52	0.2	0.22	0	0.11	0	0	0	0	0	0	0	0	0	0	0
Slc6a7	0.3	0.1	0.16	0	0	0	0	0	0	0	0	0.03	0	0	0	0	0
Agfg2	0	0	0	0	0	0	0	0	0.09	0.26	0	0	0	0	0	0	0
9430015G10Rik	0	0.23	0.09	0	0	0	0	0	0	0	0	0	0	0	0	0	0
Wdr78	0.11	0	0.17	0	0	0	0	0	0	0	0	0	0	0	0	0	0
Fads3	0.02	0	0	0.17	0	0	0	0	0	0	0	0	0	0	0	0	0
Fhl1	0	0.02	0	0	0	0	0	0	0	0	0	0	0	0	0	0	0
Lrig1	0.11	0	0	0	0	0	0	0	0.01	0	0.87	0.67	0	0	0	0	0
Camk2a	0	0	0	0	0	0	0	0.13	0	0.17	0	0	0	0.19	0	0	0
Pcgf3	0	0.01	0	0	0	0.11	0	0	0	0	0	0	0	0	0	0	0
Cast	0	0	0	0	0	0	0	0.06	0	0.21	0.15	0.15	0.27	0.27	0	0.11	0
Anks1b	0.21	0.25	0.2	0.24	0	0.12	0.22	0	0.15	0.19	0	0	0	0.17	0.23	0.13	0
Abracl	0.32	0.3	0.57	0	0	0.13	0	0	0	0	0	0	0	0	0.32	0.03	0
Ttll7	0.1	0.09	0	0	0	0.09	0	0	0	0	0	0	0	0	0	0	0
Tcp11l2	0	0.05	0.07	0	0	0	0	0	0	0	0	0.64	0	0	0.43	0	0
Taf1d	0	0	0	0	0	0	0	0	0	0	0	0	0	0	0	0	0
Adamts9	0.27	0	0	0	0.41	0.15	0	0.13	0.15	0.11	0	0	0	0.52	0	0.14	0
Ttc23l	0	0	0	0	0	0	0	0	0	0	0	0.04	0	0	0	0	0
Tmem132e	0.34	0	0	0.78	0	0	0	0	0	0.33	0.32	0	0.29	0	0.28	0.06	0
Med12l	0	0	0	0	0	0.12	0	0.21	0.53	0.27	0	0	0	0	0.04	0	0
10-Sep	0.28	0	0	0.55	0	0	0.31	0	0	0	0.05	0.65	0	0	0.27	0	0
Arhgap21	0.15	0.08	0	0.1	0	0.02	0.09	0	0	0	0	0	0	0	0	0	0.04
Jup	0.17	0.59	0.66	0	0	0	0	0	0	0	0	0	0	0	0	0	0
Cmtm8	0.14	0.14	0.42	0.55	0	0	0.18	0	0	0	0	0	0	0	0	0.15	0
Kif6	0	0	0	0	0	0	0	0	0	0	0	0	0.04	0.07	0	0	0
Pkhd1	0	0	0	0	0	0.17	0.51	0	0	0	0	0	0.02	0.95	0.18	0	0
Batf	0	0	0.3	0	0	0.48	0.7	0	0	0	0	0	0	0	0	0	0
Mtus2	0	0.14	0	0.07	0	0.14	0	0	0.17	0.14	0	0	0	0	0	0.06	0
Inpp1	0	0	0	0	0	0	0	0	0	0	0.09	0.01	0	0	0	0.26	0
Mettl4	0	0	0	0	0	0	0	0	0	0	0	0	0.05	0	0	0	0
Frmpd4	0	0	0	0	0	0.14	0	0	0.26	0.28	0.6	0	0.14	0.11	0.2	0.3	0
Efna5	0	0	0	0	0	0.16	0	0	0	0	0.02	0.26	0.21	0.23	0	0.21	0
Tbpl1	0	0	0	0	0	0	0.01	0	0	0	0	0	0	0	0	0	0
Cfap58	0	0	0	0	0	0.02	0	0	0	0.06	0.82	0	0	0.11	0	0.02	0
P2ry1	0	0.73	0	0	0	0	0	0	0	0	0	0.73	0.4	0.35	0	0	0
Trim67	0.48	0	0.21	0.09	0.03	0	0	0	0	0	0	0	0	0.2	0	0	0
Slc6a19	0	0.61	0.96	0	0	0	0	0	0	0	0	0	0	0	0	0	0
Col18a1	0.65	0.7	0	0.29	0.66	0	0	0	0	0	0	0	0	0	0	0	0
Prkcq	0.84	0	0	0.54	0	0	0.09	0	0	0.14	0	0	0	0	0.05	0	0
Htr7	0	0	0	0	0.11	0	0.51	0.19	0.69	0.05	0	0	0	0	0	0	0
Synpr	0	0.6	0.38	0	0	0.69	0	0	0	0	0	0	0	0.42	0	0	0
Zfp536	0	0	0	0	0	0	0.74	0	0	0	0.72	0.75	0	0	0	0.65	0.69
Rasgrp2	0.3	0	0	0.57	0	0.06	0.14	0	0	0	0	0	0	0	0	0	0
Sez6l2	0.15	0.03	0.16	0.02	0	0	0	0	0	0	0	0	0	0	0	0	0
Smarcc1	0	0	0	0	0	0	0	0	0	0	0	0	0	0	0	0	0
Bcl11a	0.44	0.87	0.68	0	0	0.55	0	0	0	0	0	0	0	0.07	0.18	0	0
Mpdz	0	0	0	0	0	0	0	0	0	0.1	0.2	0.03	0.02	0	0	0	0
Fam168a	0	0.03	0	0.09	0	0.07	0.04	0	0	0	0	0	0	0	0	0.03	0.12
Akap10	0	0	0	0.1	0	0	0	0	0	0	0	0	0	0	0	0	0
Fstl5	0	0	0.04	0	0	0	0	0	0	0	0.71	0.21	0	0.11	0.4	0.31	0
Mapk9	0.02	0	0	0	0	0.14	0	0	0	0	0	0	0	0	0	0	0
Inpp5b	0	0	0	0	0	0.12	0	0	0	0	0	0	0	0	0	0	0
Wnt5a	0	0	0	0	0	0	0	0	0.74	0.18	0.43	0	0	0.54	0	0.08	0
Wsb1	0	0	0	0	0	0	0	0	0.06	0.05	0.08	0.18	0	0	0	0	0
Piezo2	0.65	0.67	0.76	0	0	0	0	0	0	0	0	0	0	0	0	0	0
Ttc22	0	0.71	0.03	0	0	0.44	0	0	0	0	0	0.05	0	0	0	0	0
Epdr1	0	0	0	0	0	0	0	0	0	0	0.1	0	0	0	0	0	0
Ttll11	0.02	0	0	0	0	0	0.07	0	0	0.15	0	0	0	0	0	0	0
Zmym2	0	0.13	0.1	0.06	0	0	0	0	0	0	0	0	0	0	0	0	0
Sparcl1	0	0	0	0	0	0	0.15	0	0	0	0.43	0.73	0	0	0	0.16	0
Epha6	0.1	0	0	0.09	0	0	0	0	0	0	0	0.32	0.61	0.17	0.24	0.19	0
Slk	0	0	0	0	0	0	0	0	0	0	0.13	0	0.04	0.06	0	0.07	0
Nppc	0.57	0	0.09	0.36	0.21	0	0.05	0	0	0	0	0	0	0.73	0	0	0.15
Cecr2	0.89	0	0.46	0.15	0	0	0	0	0	0	0	0	0	0	0	0	0
Prkar1b	0.06	0.01	0	0.13	0	0.09	0.03	0	0	0	0	0	0	0	0	0	0.09
Neto2	0.38	0	0	0	0	0.11	0	0.15	0.19	0.44	0.34	0	0	0	0.1	0	0
Prkg1	0.23	0.23	0.16	0.18	0	0.12	0.2	0	0	0	0.23	0	0	0	0	0.22	0
Slit2	0	0	0.2	0	0	0.24	0.05	0.13	0.19	0.12	0	0	0	0	0	0.22	0
Eml4	0	0	0.11	0	0	0	0	0	0	0	0	0	0	0	0	0.09	0
Ptk2	0	0.11	0	0	0	0.18	0.05	0	0.13	0.15	0.12	0.16	0.08	0.18	0	0.16	0
Parn	0.12	0.06	0	0	0	0	0	0	0	0	0	0	0	0	0	0	0
Fhod3	0	0	0.06	0	0	0	0	0	0	0.09	0.21	0.12	0.16	0	0.21	0.09	0
Inpp5f	0.23	0	0.11	0.16	0.08	0	0.06	0	0	0	0	0	0	0	0	0	0
Atp8b2	0	0.01	0	0	0	0	0	0	0	0	0	0	0	0	0	0	0
Ppat	0.22	0.25	0.65	0	0	0	0	0	0	0	0	0	0	0	0	0	0
Abo	0.24	0.09	0	0.21	0	0	0.39	0	0	0	0	0	0	0	0	0	0
Plxdc2	0	0	0	0	0	0.22	0	0	0.14	0.2	0.25	0.19	0.02	0	0	0.19	0
Rnf180	0	0	0	0	0	0	0	0	0	0	0	0.04	0.11	0.14	0	0	0
Chpt1	0.02	0	0	0	0	0	0	0	0	0	0	0	0.01	0	0	0	0
Fras1	0.44	0	0	0.59	0.18	0.32	0.91	0	0	0	0	0	0	0	0	0	0
Ctdspl	0	0	0	0	0	0	0	0	0	0.11	0.11	0	0	0	0	0	0
Spef2	0	0	0	0	0	0	0	0	0	0	0	0.02	0	0	0	0	0
Pde4a	0.06	0	0	0.3	0	0	0.11	0	0	0	0	0	0	0	0	0	0
Btbd10	0	0	0	0.05	0	0	0	0	0	0	0	0	0.02	0	0	0	0
Smchd1	0	0	0.06	0.03	0	0	0	0	0	0	0	0	0	0	0	0.08	0
St18	0	0	0	0	0	0	0	0.44	0.99	0.92	0.13	0	0	0	0	0	0
Arl15	0	0	0.18	0.08	0	0.06	0	0	0	0	0.17	0	0	0.17	0	0	0
Nacc2	0.41	0.16	0.43	0	0	0	0	0	0	0	0	0	0	0	0.02	0	0.16
Rcsd1	0	0	0	0	0	0	0	0	0.75	0.7	0	0	0	0	0	0.1	0
Gadd45a	0	0	0	0	0	0.92	0	0.09	0	0	0.36	0	0	0	0	0.21	0
Cpeb4	0	0	0	0	0	0	0	0	0.12	0.01	0.04	0.06	0	0	0	0	0
Spon1	0.66	0.31	0.83	0	0	0	0.05	0.02	0	0	0	0	0	0	0	0	0
Sh3bgrl2	0.37	0	0	0	0	0	0	0	0.12	0	0	0	0	0	0	0	0
Lrba	0	0	0.15	0	0	0	0	0	0	0	0	0.13	0.13	0.1	0	0	0
Mphosph9	0.05	0	0.04	0	0	0	0	0	0	0	0	0	0	0	0	0	0
Appl2	0	0	0.18	0	0	0	0	0	0	0	0	0	0	0	0	0	0
E130308A19Rik	0.12	0.07	0	0	0	0	0	0	0	0	0	0	0	0	0	0	0
Dhrs2	0.9	0.71	0	0	0	0	0	0	0	0	0	0	0	0	0	0	0
Cwc27	0	0	0	0	0	0	0	0	0	0	0.07	0.08	0.18	0.29	0	0	0
D430041D05Rik	0	0.15	0.17	0	0	0.17	0.06	0	0.03	0.16	0	0	0	0	0	0	0
Scn4b	0.54	0	0.31	0	0	0	0	0	0	0	0.8	0.44	0	0	0	0	0
Mapk10	0.19	0.21	0.13	0.13	0	0.09	0.18	0	0	0	0.01	0.1	0	0	0	0.13	0
Npr1	0.28	0	0	0.1	0	0	0	0.46	0	0.92	0	0.58	0	0	0	0	0
Rassf8	0	0	0	0	0	0	0	0	0.27	0.59	0.63	0	0	0	0.51	0.26	0
Ift43	0	0	0	0	0	0	0	0	0	0	0.06	0	0	0	0	0	0
Opa1	0	0	0	0.07	0	0.01	0	0	0	0	0	0	0	0	0.03	0.04	0
Galnt7	0.49	0.55	0	0	0.11	0	0	0	0	0	0	0	0	0	0	0	0
Nlk	0.02	0	0.04	0.15	0	0.03	0	0	0	0	0	0	0	0	0	0.08	0
Bicc1	0	0	0	0	0	0	0	0.15	0.11	0.14	0.3	0.14	0.47	0	0.15	0	0
Hsd17b2	0.12	0	0.35	0	0	0	0	0.96	0.35	0	0	0	0	0.49	0	0	0
Lhfpl3	0	0	0	0	0	0.24	0.18	0.16	0.19	0.24	0	0.04	0.23	0.23	0.16	0.24	0.22
Mamdc2	0.05	0	0	0	0	0	0	0	0.03	0	0	0	0	0	0	0	0
Mlip	0	0	0	0	0	0	0	0	0.25	0	0.89	0.13	0.5	0.27	0.06	0	0
Impg1	0	0	0	0	0	0	0	0	0.02	0	0.49	0.16	0	0.95	0.3	0	0
Tcaf2	0.37	0	0.58	0	0	0	0	0	0	0	0	0	0	0	0.28	0.24	0
Whrn	0.8	0	0	0	0	0	0	0	0.53	0.09	0.26	0	0	0	0.07	0	0
Dcun1d3	0	0	0	0	0.01	0	0	0	0	0	0	0	0	0	0	0.13	0
Spry4	0	0	0	0	0.31	0	0	0	0	0	0.71	0	0	0	0	0.84	0
Map4k3	0.06	0	0.09	0.15	0	0	0	0	0	0	0	0	0	0	0	0.21	0
Rhoj	0	0	0	0	0	0	0	0	0	0	0.33	0.87	0	0	0.01	0.26	0
Rps6kc1	0	0	0	0	0	0	0	0	0.09	0.1	0	0	0.04	0.06	0	0	0
Plod2	0	0.15	0	0	0	0.23	0.15	0	0	0	0	0.03	0	0	0	0.52	0
Dpysl3	0.39	0.05	0.12	0.04	0	0	0.09	0	0	0	0	0	0	0	0	0	0
Gls	0	0	0	0	0	0	0	0.11	0.06	0.06	0	0	0	0	0	0	0
Cnot6l	0	0	0	0	0	0	0	0	0	0	0	0	0	0	0	0	0
Jak1	0	0	0.18	0.26	0	0	0	0	0	0	0	0	0	0	0	0	0
P2rx4	0.19	0.03	0	0	0	0.07	0	0	0	0	0	0	0	0	0.09	0	0
Birc3	0.05	0.53	0.67	0	0	0	0	0	0	0	0	0	0	0	0	0	0
Tspan4	0.07	0.12	0	0.09	0	0	0	0	0	0	0	0	0	0	0.23	0	0
2510009E07Rik	0	0.04	0	0	0.08	0	0	0	0	0	0	0	0.03	0	0	0	0
Mre11a	0.14	0.65	0.79	0	0	0.49	0	0	0	0	0	0	0	0	0	0	0
Bank1	0	0	0	0	0	0.07	0	0	0.04	0	0	0	0.04	0	0.03	0	0
Col12a1	0.09	0	0	0.03	0	0	0	0	0	0	0	0	0.76	0.76	0.24	0.12	0
Slc27a2	0.17	0	0	0.16	0	0	0.06	0	0	0	0.62	0.13	0	0	0	0	0
Cttnbp2	0	0	0	0	0	0	0.09	0	0	0.02	0	0	0	0	0	0.17	0.19
Fam122c	0	0.21	0	0	0	0	0	0	0	0	0	0.33	0.01	0	0	0.03	0
Pcnx2	0	0.11	0	0.15	0	0.19	0.19	0	0	0	0	0	0	0	0	0.14	0
Ryk	0	0	0	0	0	0	0	0	0	0	0	0	0	0	0	0	0
Elk3	0	0	0	0	0	0.07	0	0	0.04	0.09	0	0	0	0	0	0	0
Klhdc10	0	0	0	0.15	0	0.06	0.1	0	0	0	0	0	0	0	0	0.17	0.12
Slc39a10	0	0	0	0.18	0	0.12	0	0	0	0	0	0	0	0	0	0	0
Dennd4c	0	0	0	0	0	0	0	0	0	0	0	0	0.14	0	0	0	0
Stox2	0	0	0	0	0	0.13	0	0	0	0	0	0.16	0.16	0.05	0	0	0
Prlr	0.23	0.38	0.38	0	0	0.29	0	0	0	0	0	0	0	0.07	0	0	0
Slc25a12	0	0.13	0.15	0	0	0	0	0	0	0	0	0	0	0.16	0	0	0
Ptpn5	0	0	0	0	0	0	0	0	0	0	0.09	0.21	0.08	0	0	0.18	0
Dip2b	0.14	0	0	0.2	0	0	0	0	0	0	0	0	0	0	0.06	0.05	0
Kif21b	0	0	0	0	0	0	0	0	0	0	0	0	0	0	0	0	0
Cachd1	0.21	0	0	0.4	0	0.6	0	0	0	0	0.47	0.46	0	0	0.48	0	0
Asic2	0	0	0	0.21	0	0	0.06	0	0	0.2	0.14	0.37	0	0	0.21	0	0
Sox4	0	0.04	0.28	0	0	0	0.11	0	0	0	0.1	0	0	0	0	0.12	0.46
Osbpl10	0	0.13	0.2	0.28	0	0.19	0	0	0	0	0	0	0	0	0	0	0
Sgms2	0	0	0	0	0	0	0	0	0	0	0.32	0	0	0	0	0.29	0
Tmem268	0.67	0.06	0.22	0	0	0	0	0	0	0	0	0	0	0	0	0	0
Il18r1	0	0	0	0	0	0.5	0	0.26	0.9	0.68	0	0	0	0	0	0	0
Acvr2a	0	0	0	0	0	0.1	0	0	0	0	0	0	0	0	0.04	0	0.01
Cep70	0.09	0.35	0	0.17	0	0.04	0	0	0	0	0	0	0	0	0	0	0
Inf2	0	0.27	0.29	0.28	0	0.43	0.29	0	0	0	0	0	0	0	0	0	0
Vps8	0.13	0.1	0.16	0	0	0	0	0	0	0	0	0	0	0	0	0	0
Kcnb1	0	0	0	0.04	0	0	0	0	0	0	0	0	0	0	0	0	0
Dbnl	0	0.02	0	0	0	0	0	0	0	0	0	0	0	0	0	0	0
Pald1	0	0	0	0	0	0.29	0	0	0.59	0.17	0	0	0	0	0	0	0.44
Clic5	0.08	0	0	0.65	0.15	0	0.16	0	0	0	0.24	0	0	0.03	0	0	0
Fam135a	0	0	0	0.04	0	0	0	0	0	0	0	0	0	0	0	0	0
Zfp385b	0.7	0.67	0	0.39	0	0	0	0	0	0	0	0	0	0	0.3	0	0
Stk33	0.12	0	0	0	0	0	0.1	0	0	0	0	0	0.33	0.28	0.07	0.19	0.71
Cutc	0	0.63	0	0	0	0.24	0	0	0	0	0	0	0	0	0	0	0
Dmd	0	0	0	0.19	0	0	0	0	0.15	0.22	0	0.1	0.33	0.05	0.21	0.19	0
Polr2b	0.3	0	0.1	0	0	0	0	0	0	0	0	0	0	0	0	0	0
Mycl	0	0.17	0.48	0.35	0	0	0	0.23	0	0.04	0	0	0	0	0	0	0.79
Grap2	0.47	0.59	0.94	0	0	0	0	0	0	0	0	0.38	0	0	0	0	0
Ajap1	0	0.6	0.09	0	0	0.38	0	0	0	0	0	0	0	0	0	0	0
Jam3	0	0.21	0	0	0	0.08	0	0	0	0	0	0	0	0	0	0	0
Gas2	0.42	0.1	0.01	0	0	0.17	0.16	0	0	0	0	0	0	0	0	0	0.06
Atg16l1	0	0.11	0.24	0	0	0	0	0	0	0	0	0	0	0	0	0.02	0
Usp32	0.13	0.04	0.1	0.13	0	0	0.03	0	0	0	0	0	0	0	0	0	0
Nkpd1	0.13	0	0.02	0	0	0	0	0	0	0	0	0	0	0	0	0	0.13
Tmem143	0	0.16	0.04	0	0	0	0	0	0	0	0	0	0	0	0	0	0
Unc5c	0	0	0	0	0	0.1	0	0.23	0.28	0.23	0.18	0	0	0	0	0	0
Hapln2	0.62	0.53	0.6	0	0	0	0	0	0	0	0	0.38	0	0	0	0	0
Phldb2	0.23	0.13	0.34	0	0.17	0.39	0	0	0	0	0	0	0	0	0	0	0
Slc16a6	0.05	0.57	0.83	0	0	0	0	0	0	0	0	0	0	0	0	0	0
Nr5a1	0	0	0	0	0	0.17	0	0	0.39	0.54	0.25	0.66	0.37	0.27	0	0	0.09
Onecut1	0.81	0	0	0.94	0	0	0.7	0	0	0	0	0	0	0	0	0.03	0
Bicd1	0.18	0.03	0	0	0	0.11	0.1	0	0	0	0	0	0.14	0	0	0	0
Ccdc88a	0	0.1	0	0.1	0	0.12	0.12	0	0	0	0	0	0.07	0	0	0.09	0
Adam11	0.01	0.04	0	0.05	0	0.05	0	0	0	0	0	0	0	0	0.09	0	0
Syne2	0	0.37	0	0	0	0	0	0	0	0	0.8	0	0	0	0	0	0
Lhx5	0	0	0	0.29	0	0	0	0	0	0	0.54	0.81	0.78	0	0	0	0
Epb41	0.12	0	0	0	0	0	0	0	0	0	0.05	0.16	0.18	0.1	0.2	0	0
Slc38a7	0	0	0	0	0	0	0.12	0	0	0	0	0	0	0	0	0	0
Sec14l5	0.09	0	0	0.4	0	0.04	0.51	0	0.07	0	0	0	0	0	0	0	0.31
Bach2	0	0.11	0.08	0	0	0	0	0	0	0	0	0	0.03	0	0	0	0
Fam20c	0.16	0.02	0	0.24	0.33	0	0	0	0	0	0	0	0	0.35	0	0	0.47
Synpo	0	0	0	0	0	0.14	0	0	0	0	0	0	0	0	0	0	0.03
Car2	0.15	0.7	0.08	0.51	0	0	0	0	0	0	0	0	0	0.31	0	0	0
Steap3	0	0.14	0	0	0.45	0.05	0	0	0.43	0	0	0	0	0	0	0	0
Atp6v1c2	0.76	0.59	0	0.05	0	0	0	0	0.17	0	0	0	0	0	0	0	0
Crocc	0	0	0	0	0	0	0	0	0.22	0.21	0	0	0	0	0	0	0
Ppp6r3	0.01	0	0.11	0	0	0	0	0	0	0	0	0.14	0	0	0	0	0
Greb1l	0.22	0.56	0.32	0	0	0.18	0	0	0	0	0	0	0	0	0	0	0
Col19a1	0.03	0	0	0.24	0.26	0	0.16	0	0	0	0	0	0.12	0	0.49	0.44	0
Gpr171	0	0	0	0	0	0	0	0	0.68	0.75	0.01	0	0	0	0	0	0
Kdm4c	0.09	0.09	0	0	0	0.06	0	0	0.07	0.01	0	0	0	0	0	0.07	0
Fbxo16	0	0	0	0	0	0	0	0	0	0	0	0	0	0	0	0	0
St8sia2	0	0	0.26	0	0	0	0	0.74	0.54	0	0.22	0.2	0	0.74	0	0	0
Fam107b	0	0	0	0	0	0	0	0	0	0	0.86	0.75	0.45	0	0	0.28	0
Hspa12a	0	0.13	0	0.15	0	0.17	0	0	0	0.05	0.12	0	0	0	0	0.06	0
BC052040	0	0	0	0	0	0	0	0	0.02	0.11	0	0	0	0	0	0	0
Slc35f1	0.17	0	0	0.12	0	0.02	0	0	0	0.09	0	0.01	0.2	0	0.22	0.09	0
Duox1	0.31	0.48	0.54	0	0	0	0	0	0	0	0.44	0.18	0	0.2	0	0	0
Kcnk3	0.35	0.16	0	0.12	0	0	0	0	0	0	0	0.08	0	0	0	0	0
Myo6	0	0	0	0	0.02	0.06	0	0	0	0	0	0	0	0	0	0	0
Snx29	0.09	0.05	0.16	0	0	0	0	0	0	0	0	0	0	0	0	0	0
Camk1g	0	0	0.07	0	0	0	0	0	0.29	0	0	0	0	0	0.1	0	0
Tesk2	0	0	0	0.65	0	0.2	0	0	0.07	0.03	0	0	0	0	0	0	0
Ptprg	0.16	0	0	0.2	0	0	0.18	0	0	0	0	0	0.3	0.23	0	0.17	0
Grem2	0	0	0	0	0	0	0.11	0	0	0	0	0	0	0.04	0	0.72	0
Pls3	0	0.13	0.44	0.92	0.25	0	0	0	0	0	0	0	0	0	0	0	0
Arhgef7	0	0	0	0.11	0	0	0	0	0	0	0	0	0	0.11	0	0.03	0
Tmem132c	0.16	0	0.08	0	0	0	0	0	0	0.07	0.69	0.87	0	0	0.17	0	0
Pde3a	0	0	0	0.04	0	0.5	0.68	0	0	0	0.1	0	0.04	0	0	0.74	0.25
Cbln2	0	0	0	0	0	0.04	0	0	0	0.49	0.04	0	0.71	0.93	0.23	0.14	0
Kazn	0	0	0	0.21	0	0.21	0.22	0.09	0.22	0.22	0.13	0	0	0	0	0.18	0
Ank	0.01	0	0	0	0	0.21	0	0.11	0.04	0.13	0	0	0	0	0	0	0
Mvk	0.24	0	0.39	0.02	0.13	0.03	0	0	0	0	0	0	0	0	0	0	0
Cd70	0	0.11	0.9	0	0	0	0	0	0.15	0	0	0	0.11	0	0	0	0
Bag3	0.55	0.62	0.8	0	0	0.65	0	0	0	0	0	0	0	0	0	0	0
Nap1l1	0	0.01	0.03	0	0	0	0	0	0	0	0	0	0.06	0	0	0	0
Slc8a1	0	0.06	0	0	0	0.05	0.18	0	0.16	0.16	0.04	0.21	0.18	0.06	0	0.19	0
Eps8	0.18	0	0.19	0	0	0	0.01	0	0	0.2	0	0	0	0	0	0	0
Adcy8	0.78	0.16	0	0	0	0	0	0	0	0	0	0	0	0	0	0.84	0.43
Trdmt1	0	0	0	0	0	0	0	0	0	0	0	0	0	0.61	0	0.01	0
Muc1	0	0	0	0	0	0	0	0	0.35	0	0	0.28	0	0.36	0	0	0.96
Vav2	0.55	0.61	0	0.11	0	0.42	0	0	0	0	0	0	0	0	0	0	0
Lep	0	0.16	0	0	0	0	0.35	0.96	0	0.69	0	0	0	0	0	0	0
Gstm5	0.3	0.14	0	0	0	0	0	0	0	0	0.01	0	0	0	0	0	0
Kank2	0.68	0.17	0.36	0.33	0	0	0	0.33	0	0	0	0	0	0	0.22	0	0
Pdzd7	0.36	0.04	0.09	0.08	0	0	0.03	0	0	0	0	0	0	0	0	0	0
Galc	0	0.12	0.02	0	0	0	0	0	0	0	0	0	0	0.13	0	0	0
Zfp804a	0.15	0.41	0.31	0.48	0	0.24	0.67	0	0	0	0	0	0	0	0	0.04	0
Hlcs	0.02	0.06	0.1	0.1	0	0	0	0	0	0	0	0	0	0	0	0	0.22
Dna2	0.16	0.02	0	0	0	0	0	0	0	0	0	0	0	0	0	0	0
Creg2	0	0	0	0	0	0	0	0	0	0	0	0	0	0	0	0	0
Syt14	0	0	0	0.08	0	0.13	0	0.05	0.06	0.07	0	0	0	0	0	0	0
Jhy	0	0	0.07	0.32	0	0	0	0	0.3	0	0	0	0	0	0	0	0.05
Gsk3b	0.03	0.1	0	0.09	0	0.03	0	0	0	0	0	0.14	0	0	0	0	0
Kcnip1	0	0	0	0	0	0.22	0	0.23	0.3	0.23	0	0.19	0.24	0.22	0	0	0
Insr	0.09	0	0	0	0	0	0	0	0	0	0.14	0.22	0	0	0	0.15	0
Scg2	0	0	0	0	0	0	0	0	0	0	0.25	0.25	0	0	0	0.11	0
Mrps5	0	0.03	0.15	0	0	0	0	0	0	0	0	0	0	0	0	0	0
Slc6a17	0	0	0	0	0	0	0	0	0	0	0.13	0	0	0	0.23	0.66	0
Fnbp1	0.12	0.06	0.2	0	0	0	0	0	0	0	0	0.05	0.13	0	0	0	0
Rxra	0.36	0.47	0.54	0	0	0.17	0	0	0	0	0	0.02	0	0	0	0	0
Lnx1	0	0	0	0	0	0	0.13	0	0	0.06	0	0	0	0	0	0	0
Wwp1	0.32	0	0.16	0	0	0	0	0	0	0	0	0	0	0	0	0	0
Tmem159	0	0	0	0	0	0	0	0.42	0.59	0.83	0	0	0.32	0.23	0	0	0
Galnt1	0	0	0	0	0	0	0	0	0	0	0	0	0.02	0	0	0	0
Pnpla3	0.26	0.4	0.48	0.37	0	0.12	0.16	0	0	0	0	0	0	0	0	0	0
Zfp618	0	0	0	0	0	0	0	0	0	0	0	0.11	0.21	0.08	0	0	0
Ubb	0	0	0	0	0	0	0	0.15	0	0	0	0.03	0.18	0	0	0	0.17
Sgcg	0.11	0.04	0.21	0	0	0.02	0	0	0	0	0	0	0	0	0	0	0
Moxd1	0	0.01	0.36	0	0	0.14	0	0	0.81	0.15	0.02	0	0	0	0	0	0
Dnmbp	0	0.06	0	0	0	0	0	0	0	0	0	0.43	0	0	0.12	0	0
Mapkap1	0	0	0.13	0	0	0	0	0	0	0	0	0	0.06	0	0	0	0
Neurl1b	0	0	0	0	0	0	0	0	0.25	0.49	0	0	0	0	0	0	0
Wipf3	0	0	0.02	0	0	0	0	0	0.1	0	0	0	0	0.46	0	0.13	0
Agpat4	0	0	0	0	0	0	0	0	0	0	0.03	0.02	0.12	0.11	0	0	0
Gclc	0	0	0	0	0	0	0	0.11	0.05	0	0	0	0	0	0	0.01	0
Nuak1	0	0	0	0	0	0	0.11	0	0	0	0	0	0	0	0.43	0	0
Timp3	0	0.05	0	0	0	0.73	0.31	0	0	0	0	0	0	0.08	0	0.52	0
Zcchc2	0	0	0	0	0	0	0	0	0	0	0	0	0	0	0	0	0
Fmnl2	0	0.1	0.21	0	0	0.18	0.01	0	0	0	0.2	0.04	0	0	0	0.08	0
Mpo	0.04	0	0	0	0	0	0	0	0.72	0.56	0.44	0	0	0	0	0	0
Fam107a	0	0	0	0	0	0	0.01	0.06	0	0	0	0	0	0	0	0	0
Plscr4	0	0.29	0	0	0	0	0	0	0.25	0	0.45	0	0	0	0	0.09	0.06
Syt6	0	0.12	0.07	0	0	0.82	0.07	0.04	0.4	0	0	0	0	0	0	0	0
Sh3bp5	0	0	0	0	0	0	0	0	0.05	0.06	0.09	0.13	0	0	0.28	0	0
Snx25	0.06	0.52	0.14	0	0	0.16	0	0	0	0	0	0	0	0	0	0	0
Rgs6	0	0	0.2	0	0.09	0	0	0.12	0.19	0	0.04	0	0	0	0.2	0.46	0
Ino80	0.09	0	0.08	0	0	0	0	0	0	0	0	0	0	0	0	0	0
Itga7	0.32	0.59	0.25	0	0	0	0	0	0	0	0.63	0	0	0	0.09	0.08	0
Scaf11	0	0	0	0	0	0	0	0.07	0	0	0.14	0.14	0.16	0	0	0	0
Arpp21	0	0	0	0.27	0	0.03	0.3	0	0	0	0	0	0.24	0.14	0	0.01	0
Peli2	0.24	0.46	0.3	0.08	0	0	0	0	0.16	0	0	0.36	0	0	0	0	0
Ercc6	0	0	0	0	0	0.33	0.04	0	0	0	0	0	0	0	0	0	0
Cdan1	0.18	0.03	0	0.03	0	0	0	0	0	0	0	0	0	0	0	0	0
Igsf3	0.09	0.45	0.16	0	0	0	0	0	0	0	0.07	0	0	0.33	0	0	0
Htr2a	0	0	0	0.54	0	0	0.3	0	0	0	0	0	0	0	0.78	0.54	0
Eml3	0	0	0.87	0	0	0	0	0	0	0	0	0	0	0.79	0	0.59	0
Sbf2	0.22	0.18	0.16	0.18	0	0	0	0	0.07	0	0	0.07	0	0	0	0	0
Esyt3	0.17	0.23	0	0	0.23	0	0	0	0	0	0	0	0	0	0	0	0
Dlgap4	0	0.08	0	0	0	0.15	0	0	0	0	0	0	0	0	0	0	0
Dcbld2	0	0	0	0.35	0	0	0.02	0	0	0	0	0	0	0	0	0.21	0
Nipal2	0	0.06	0	0	0	0.05	0	0	0	0	0	0	0	0.02	0	0	0
Cyp19a1	0.07	0	0.37	0	0	0	0	0	0.65	0.9	0	0	0	0	0	0	0
Phldb1	0	0.08	0	0	0	0.04	0.08	0	0	0	0	0	0	0	0	0	0
Usp28	0	0	0	0	0	0.05	0	0	0	0	0	0	0	0	0	0	0
Dsel	0	0	0	0	0	0.65	0.56	0	0	0	0	0	0.19	0.63	0	0.58	0
Tmem243	0	0	0	0	0	0	0	0	0	0	0.05	0.52	0.13	0	0	0.11	0.05
Myo1e	0	0.28	0.96	0	0.06	0	0.09	0	0	0	0	0	0	0	0	0.1	0
Arhgef3	0	0	0	0	0	0	0	0	0	0	0.63	0.39	0.04	0.15	0.09	0.07	0
Robo2	0.19	0	0	0.23	0	0.23	0.18	0	0.1	0	0	0	0.19	0.24	0.08	0.11	0
Ergic1	0.02	0	0	0	0	0	0	0	0	0	0	0	0	0	0	0	0
Tbl1xr1	0.12	0	0	0	0	0.09	0	0	0	0.08	0.1	0.18	0.2	0.07	0.13	0	0
Cpped1	0	0	0	0	0	0	0	0.01	0.04	0.01	0	0	0.31	0.27	0	0	0
Btbd3	0	0	0	0	0	0	0	0	0.35	0.15	0	0.08	0	0	0	0	0
Cyp27a1	0	0	0.16	0	0.5	0	0.19	0.11	0	0	0.04	0	0	0	0	0	0.41
Tmem164	0	0	0	0	0	0	0	0	0.05	0.17	0	0	0	0.47	0	0	0
Slc8a2	0	0	0	0.1	0	0.17	0.04	0	0	0	0	0	0	0	0	0	0
Kcnip3	0	0.14	0	0	0	0	0	0	0	0	0	0.07	0	0	0.04	0	0
Fbxo21	0	0	0	0	0	0	0	0	0	0	0	0	0	0	0	0	0
Cdkal1	0	0	0	0	0	0	0	0	0	0	0.17	0.19	0.23	0.19	0.16	0	0
Irs4	0	0.05	0	0	0	0.15	0	0	0	0	0	0	0	0.42	0	0.13	0.08
Pkp1	0	0	0	0.1	0	0	0.3	0.34	0.65	0.29	0	0	0	0	0	0	0.79
Mettl15	0.02	0	0.09	0	0	0	0	0	0	0	0	0	0	0	0	0	0
Wnt9a	0.49	0.49	0.35	0.01	0	0.11	0.03	0	0	0	0	0	0	0	0	0	0
Hs3st2	0	0	0.7	0.29	0	0	0	0	0.58	0	0.78	0	0	0	0.25	0.35	0
B3glct	0	0.45	0.18	0	0	0	0	0.11	0.36	0.78	0.19	0	0	0	0	0	0
Ppfibp1	0	0	0.34	0	0	0	0.02	0	0	0	0	0.36	0	0	0	0	0
Sgsm1	0	0.11	0.06	0	0	0	0	0	0	0	0	0	0.13	0.18	0	0	0
Ids	0	0	0	0	0	0	0	0.08	0	0	0.03	0	0.1	0	0	0	0
Atg7	0.12	0	0	0	0	0.16	0	0	0	0.02	0	0	0	0	0.15	0.04	0
Adamts14	0	0	0	0.38	0	0	0	0.64	0.69	0.4	0.28	0	0	0	0.11	0	0
Ttll12	0.24	0.14	0.54	0	0	0	0	0	0	0	0	0	0	0	0	0	0
Nicn1	0	0.17	0.15	0	0	0.02	0	0	0.04	0	0	0	0	0	0	0	0.52
Syt1	0	0.21	0	0.24	0	0	0.24	0	0	0	0.24	0.22	0	0	0	0.24	0
Crip2	0	0	0	0	0	0	0	0.21	0.12	0.04	0	0	0	0	0	0	0.1
Sema5a	0.1	0.27	0.14	0	0	0.11	0	0	0	0.1	0.27	0	0	0	0.04	0	0
Ltbp1	0.52	0.15	0.69	0	0	0	0	0	0	0	0	0.36	0	0	0	0	0
Rspo2	0	0	0	0.3	0	0	0	0	0	0	0	0	0.93	0.29	0	0	0
Dhrs3	0	0.7	0.04	0	0	0.48	0	0	0.56	0.22	0	0	0	0.16	0	0	0
Agpat5	0	0	0	0	0	0	0	0	0	0	0.02	0	0	0	0	0.21	0
Adgrb2	0	0	0	0	0	0.09	0	0	0.07	0.08	0	0	0	0	0	0	0
Dysf	0.18	0	0	0.12	0	0	0.07	0	0.11	0	0	0	0	0	0	0	0
Lgals3bp	0	0	0.16	0	0	0	0	0	0	0	0.33	0.43	0	0	0.3	0.14	0.85
Cry1	0	0	0	0	0	0	0	0	0	0	0.16	0	0	0	0	0.37	0
Trib2	0.02	0	0.51	0.3	0	0	0.3	0	0	0	0.3	0	0.69	0	0	0	0
Vgll2	0	0	0	0	0	0	0	0.53	0.69	0.95	0.35	0	0	0	0.64	0	0
Fosl2	0	0.65	0	0	0	0	0	0	0	0	0.48	0	0.07	0	0	0.87	0
Prim2	0	0.08	0	0	0	0.08	0	0	0	0	0	0.02	0	0	0	0	0
Nr2f1	0.35	0.6	0.19	0	0.01	0.65	0	0.03	0	0	0	0	0	0	0	0	0
Cdon	0.4	0	0	0.08	0	0	0	0	0	0	0	0	0	0	0	0	0
Cxxc5	0	0	0	0	0	0	0.24	0	0.46	0	0	0	0	0	0.01	0	0
Prr16	0	0	0	0	0	0.22	0.31	0.12	0.15	0.12	0	0	0.18	0.47	0	0.22	0.17
Mad1l1	0.11	0.12	0.1	0	0	0	0	0	0	0	0	0	0	0	0	0	0
Itpr2	0	0.2	0	0.13	0	0	0	0	0	0	0.11	0.12	0	0.75	0	0.16	0
Il1rl2	0	0	0	0	0	0	0	0.26	0.37	0.43	0	0	0	0	0	0	0
Cdk17	0	0	0	0	0	0.01	0	0	0.01	0.02	0	0	0	0	0	0	0
Snx32	0.06	0.09	0.28	0.1	0	0	0	0	0	0	0	0	0	0	0	0	0
Parvb	0.09	0	0	0.06	0	0	0	0	0	0	0	0	0	0	0	0	0
Slc17a5	0	0	0	0.1	0	0	0.04	0	0	0	0	0	0	0	0	0	0
Slc7a4	0	0	0	0	0	0	0	0	0.1	0	0	0	0	0	0	0	0.23
Hmcn1	0.82	0	0.06	0	0	0.16	0	0	0	0	0	0	0	0.07	0	0.03	0.45
Lrp4	0.07	0	0	0	0.59	0	0	0.37	0.65	0.61	0	0	0	0	0.01	0	0
Grid2	0.1	0.18	0	0	0	0	0.23	0	0.24	0.14	0.25	0.21	0.21	0.21	0.17	0.25	0
Trim36	0.39	0.14	0.32	0	0	0.32	0	0	0.04	0	0	0	0	0	0	0	0.48
Elavl2	0	0	0	0.5	0	0	0.27	0	0	0	0	0	0.2	0.3	0.31	0	0
Skap2	0	0	0	0	0	0	0	0	0	0.04	0	0	0	0	0.24	0	0
Micu1	0.17	0.11	0.29	0	0	0.16	0	0	0	0	0	0	0	0	0	0	0
Slc38a1	0.1	0	0	0	0	0	0	0	0	0	0	0	0	0	0	0.17	0
Thy1	0	0	0	0.06	0	0	0	0	0	0	0	0.03	0	0.05	0	0	0
Rapgef2	0.14	0	0	0	0	0	0	0	0	0	0.09	0.15	0.03	0	0	0	0
Car3	0.38	0.79	0.82	0.37	0	0	0	0	0	0	0	0	0	0	0	0	0
Poln	0	0.13	0.22	0	0	0.01	0	0	0	0	0	0	0	0	0	0	0
Sntb1	0.09	0	0	0.12	0.89	0	0.18	0	0	0	0	0.81	0	0	0	0	0
Ptpn13	0	0	0.25	0.74	0.48	0	0.27	0	0.02	0	0	0	0	0	0	0	0
P2rx6	0	0	0	0	0	0	0	0.73	0.54	0.25	0.19	0.2	0	0	0.02	0	0
Rnf130	0	0	0	0	0	0.05	0	0	0	0	0	0	0	0.16	0	0.02	0
Dusp4	0	0	0	0.03	0.8	0	0.07	0	0	0	0.51	0	0	0	0	0.69	0
Lamp2	0	0	0	0	0	0	0	0	0	0	0	0.11	0	0	0.03	0	0
Vamp1	0.01	0	0	0	0	0.25	0	0	0.32	0.52	0	0	0	0	0	0	0
Isl1	0	0.51	0.89	0	0.06	0	0	0	0	0	0	0	0	0.67	0	0	0
Grik2	0.23	0.22	0	0.25	0	0	0.25	0	0	0	0	0.24	0.19	0	0	0.1	0
Ubash3b	0	0	0	0	0	0.18	0	0	0.06	0	0.31	0.18	0	0	0	0.28	0
Maf	0	0	0.71	0	0	0	0.59	0	0	0	0	0	0.8	0	0	0	0
Ptk2b	0	0.3	0	0	0	0.57	0.1	0	0.17	0	0	0	0	0	0	0	0
Kcnj2	0	0	0	0.02	0	0	0	0	0	0	0	0.54	0.81	0.78	0	0.32	0
Ing4	0.07	0.08	0	0	0	0	0	0	0	0	0	0	0	0	0	0	0
Mcf2l	0	0	0	0	0	0	0	0	0	0	0	0	0	0	0.06	0	0
Slc39a8	0	0	0	0.11	0.22	0	0.08	0	0	0	0	0.18	0.81	0	0	0	0
Evi5	0	0	0	0	0	0.18	0	0	0	0	0	0.11	0.12	0	0.17	0	0
Adgra2	0.91	0.67	0	0.39	0	0.64	0	0	0	0	0	0	0	0	0	0	0
Cradd	0	0	0	0	0.08	0	0	0	0	0	0	0.17	0	0	0	0	0
Abca7	0.79	0.24	0.08	0	0	0	0	0.07	0	0	0	0	0	0	0	0	0
Trim63	0.11	0.22	0.37	0	0	0.06	0	0	0	0	0	0	0	0	0	0	0
Ttc7b	0	0.03	0.04	0	0	0	0	0	0	0	0	0.13	0	0	0	0	0
Myo3a	0	0	0	0	0	0	0	0	0	0	0	0	0.94	0.54	0	0.68	0
Rgs8	0.46	0.12	0	0	0	0.32	0	0	0	0	0	0	0	0	0.73	0	0
Gpr176	0	0.1	0	0	0	0	0	0	0	0	0	0.09	0.26	0	0.22	0.11	0
Pde4d	0	0.17	0	0.22	0	0	0.23	0	0.22	0	0	0	0	0	0	0.24	0.06
Efnb2	0	0.42	0.43	0	0	0	0.01	0	0	0	0	0	0.05	0	0	0	0
Btbd9	0	0.18	0	0	0	0.09	0	0	0	0	0	0.01	0	0	0	0.2	0
Cpne6	0	0	0	0	0.69	0	0	0	0	0	0.24	0.18	0	0.13	0.44	0.02	0.16
Rhpn1	0	0.42	0	0	0	0	0	0	0	0	0.04	0	0	0	0	0	0
Slco2a1	0.02	0.45	0	0	0	0	0	0	0	0	0	0	0	0	0	0	0
Drc1	0.07	0.07	0.05	0	0	0	0	0	0	0	0	0	0	0	0	0	0
Plch1	0.49	0.13	0.06	0.14	0	0	0	0	0	0	0	0.09	0	0.19	0.11	0	0.02
Herc3	0.17	0	0	0	0	0	0	0	0	0	0	0.03	0	0	0.04	0	0
Nkx2-1	0.43	0.61	0.62	0.67	0	0.38	0.36	0	0	0	0	0	0	0	0	0	0
Fam102b	0	0	0	0.08	0.24	0	0	0	0	0	0	0	0.19	0	0	0.18	0
Mink1	0	0	0.05	0	0	0.08	0	0	0	0	0	0	0	0	0	0	0
Lhfpl2	0.22	0	0	0	0	0	0	0	0	0	0.64	0	0.06	0.52	0	0	0
Id2	0	0.25	0	0	0	0.42	0.62	0.81	0	0	0	0	0	0	0.03	0	0
Bbx	0	0	0.05	0.16	0	0	0	0	0	0	0	0.13	0.01	0	0	0	0
Chat	0	0.74	0.76	0	0	0.66	0	0	0	0	0	0	0	0	0	0	0
Khdrbs3	0	0	0.06	0.2	0	0	0	0	0	0	0	0	0	0.07	0.22	0.18	0
Kcnh3	0.43	0.6	0.13	0.08	0	0.78	0.34	0	0	0	0	0	0	0	0	0	0
Stc1	0	0	0	0	0	0	0	0	0.52	0	0	0.78	0.66	0.23	0	0.2	0
Laptm4b	0.47	0	0	0	0	0	0	0.18	0	0	0	0	0	0	0	0	0
Cdyl	0	0	0	0	0	0	0	0	0	0.12	0	0	0.02	0	0	0	0
Rere	0.1	0.12	0	0	0	0	0	0	0.04	0.03	0.19	0.23	0.23	0.19	0.01	0.21	0.18
Slc25a23	0.11	0	0	0.03	0	0	0	0	0	0	0	0	0	0.09	0.02	0	0
Mtss1	0	0	0.04	0.19	0	0	0	0	0	0	0.19	0	0.15	0.09	0.01	0	0
Actl6b	0	0.04	0.1	0	0	0.01	0	0	0	0	0	0	0	0	0	0	0
Nectin3	0	0	0	0	0.13	0.25	0	0.24	0.7	0.47	0	0	0	0	0	0	0
Pxdn	0	0	0.72	0	0	0	0	0	0	0	0	0	0	0	0	0	0
Angpt1	0	0	0	0.16	0	0	0.91	0	0	0.02	0	0	0.08	0	0.24	0.25	0
Smarca5	0	0	0	0	0	0	0	0	0	0.04	0	0	0	0	0	0	0
Smurf1	0.04	0.14	0.17	0	0	0	0	0	0	0	0	0	0	0	0	0.03	0
Tshz3	0	0	0	0	0	0	0	0	0	0	0.88	0.82	0.27	0	0	0.55	0
Arid2	0	0	0.08	0	0	0	0	0	0	0	0	0.09	0	0.14	0	0	0
Grm3	0	0	0	0.12	0	0	0.34	0	0	0	0	0	0	0	0	0	0
Haus6	0.05	0.13	0.06	0	0	0	0	0	0	0	0	0	0	0	0	0	0
Kirrel3	0.04	0.14	0.1	0.36	0	0.21	0.74	0	0	0	0	0	0	0	0	0.32	0.19
Abcc5	0	0	0	0	0	0.09	0	0.12	0.17	0.22	0	0	0	0	0	0	0
Aamdc	0	0	0.59	0	0	0	0	0	0	0	0.05	0	0	0	0	0	0
Frmd4b	0.59	0.36	0.39	0	0	0	0	0	0.15	0.28	0	0	0	0	0	0	0
Tubg1	0.22	0	0	0.1	0	0	0	0	0	0	0	0	0	0	0	0	0
Gprc5c	0.49	0.01	0.97	0	0	0	0	0	0	0.21	0	0	0	0	0	0	0
Cbfa2t2	0	0	0	0.08	0	0	0	0	0	0	0	0	0.12	0.09	0.02	0	0
Pitpnm2	0	0	0	0.11	0.07	0	0	0	0.05	0.04	0	0.07	0.11	0	0	0	0
Prkg2	0	0	0	0	0.06	0	0	0	0.71	0.77	0	0	0	0	0	0	0
Stil	0.11	0.5	0.56	0	0	0	0	0	0	0	0	0	0	0	0	0	0
Nhs	0.07	0.02	0.12	0	0	0	0	0	0	0	0.16	0	0	0	0	0.07	0
Bcar3	0	0	0	0	0	0.26	0	0.78	0.57	0.59	0	0	0	0	0	0.08	0
Cit	0.12	0	0	0	0	0	0	0	0	0	0	0	0	0	0.15	0	0
Deup1	0	0	0	0	0	0	0	0.09	0	0.02	0	0	0	0	0	0	0
Enc1	0	0	0	0	0.04	0	0	0.3	0.08	0	0.11	0	0	0	0	0	0
Il1rapl1	0.24	0.08	0	0	0	0.15	0.19	0.17	0.2	0.18	0	0	0	0	0.04	0.2	0
Palld	0	0	0.04	0	0	0	0	0	0	0	0.27	0	0	0	0	0	0
Pde1c	0.4	0	0	0	0	0	0	0	0	0	0	0.97	0.84	0	0	0	0
Aff2	0	0	0.02	0.06	0	0	0.47	0	0	0	0	0	0	0	0	0	0.02
Cdc42se2	0	0	0	0	0	0.13	0	0	0	0	0	0.01	0	0	0	0.04	0
3-Mar	0.12	0	0	0.02	0.16	0	0	0	0	0	0.58	0	0	0.09	0	0	0
Igfbp4	0.56	0.45	0	0	0	0	0	0	0	0	0.8	0.31	0	0	0.29	0	0
Gpr149	0	0	0	0	0	0.11	0	0.3	0.79	0.66	0	0	0	0	0	0	0
Cog6	0.08	0	0	0	0	0	0	0	0	0	0	0	0	0	0	0	0
Gfra2	0	0	0	0	0	0.02	0	0.38	0.82	0.5	0	0	0	0	0	0	0
Gpc5	0	0	0.23	0.24	0	0.23	0.54	0	0	0.14	0	0	0	0	0	0.23	0
Gpr39	0.05	0	0	0	0	0	0	0	0.7	0.2	0.09	0	0	0.51	0	0	0
5730409E04Rik	0	0	0	0	0	0	0.1	0	0.05	0	0	0	0	0	0	0	0.21
Pla2g7	0.63	0	0.27	0.15	0.74	0	0	0	0	0	0.11	0	0	0	0.26	0	0
Cacnb4	0.13	0.08	0	0.07	0	0	0	0	0	0	0	0	0	0	0	0	0
Sgpp2	0	0	0.01	0.06	0	0	0.03	0	0	0	0	0	0.06	0	0	0	0
Tusc3	0	0	0	0.14	0	0	0	0	0	0	0.14	0.17	0.06	0.07	0	0	0
Opcml	0	0	0	0	0	0	0	0.23	0.41	0.24	0.21	0.27	0.26	0.37	0.17	0	0
Tet3	0	0	0	0.16	0	0	0	0	0	0	0	0	0	0	0	0.02	0
Wif1	0	0	0.62	0	0.14	0.43	0	0	0	0.1	0	0	0	0.18	0.11	0.08	0
Fcho2	0.17	0.3	0.47	0	0	0	0	0	0	0	0	0	0	0	0	0	0
Pbxip1	0	0	0	0	0	0	0.37	0	0.1	0.05	0.53	0	0	0	0	0	0
Pth2r	0	0	0	0	0	0.24	0.97	0	0	0	0	0	0	0	0	0.17	0.66
Syt5	0	0	0	0	0	0.12	0	0.07	0	0	0	0	0	0	0	0	0
Endou	0.13	0.42	0	0	0	0	0	0.03	0.06	0	0	0	0	0	0	0	0.87
Sgcd	0	0	0.02	0	0	0	0	0	0	0	0.07	0.08	0	0	0.01	0	0
Prrc2c	0	0	0	0.02	0	0	0	0	0	0.1	0	0	0	0	0	0	0
Xpc	0	0	0	0	0	0	0	0	0	0	0	0.06	0	0	0	0	0
Hs3st5	0	0	0	0	0	0.16	0	0	0.24	0.17	0	0	0	0.03	0.26	0.12	0
Ncald	0.47	0	0.08	0.71	0.46	0	0	0	0	0	0	0.38	0.2	0	0	0	0
Ccs	0.05	0.04	0.04	0.06	0	0	0	0	0	0	0	0	0	0	0	0	0
Maob	0	0	0	0	0	0.16	0	0.02	0	0	0	0.09	0.09	0	0	0	0
Mettl25	0	0	0	0.08	0	0	0.16	0.05	0	0	0	0	0	0	0	0	0.2
Mllt10	0	0.07	0	0	0	0.07	0.16	0	0.13	0.14	0	0	0	0	0	0.09	0
Abca5	0	0	0	0.04	0	0	0	0	0	0	0	0	0.11	0	0	0.02	0
Zbtb20	0	0	0	0	0	0	0.18	0	0	0	0.23	0.28	0.18	0.22	0	0.24	0.12
Slc22a15	0	0	0	0	0	0	0	0.11	0	0	0	0	0	0	0	0	0
Arid1b	0	0.21	0	0	0	0	0.1	0	0.03	0	0	0	0	0	0	0	0
Nwd2	0.32	0	0	0	0	0	0	0	0.28	0.14	0	0	0	0	0.61	0.08	0
Ska2	0	0	0	0	0	0	0	0	0	0	0.11	0.21	0	0	0	0	0
Elmod1	0.18	0	0	0	0	0	0	0	0	0	0.34	0.04	0.24	0.23	0.28	0	0
Pcsk2	0	0.26	0.16	0.16	0	0.24	0.11	0	0	0	0	0	0	0	0	0	0
Rell1	0	0	0	0	0	0	0	0.22	0.71	0.37	0.58	0	0	0	0	0	0
Far2	0.11	0	0	0	0.01	0	0	0	0	0	0.09	0.31	0	0	0	0	0
Smarca2	0.17	0	0	0	0	0	0	0	0.13	0.15	0.13	0	0	0	0	0	0
Trak2	0	0	0	0.11	0	0	0	0	0	0	0	0	0	0	0	0	0
Htra1	0	0	0	0.47	0	0	0	0	0.02	0.1	0.04	0.07	0	0	0	0.23	0
Gsn	0.6	0.68	0.01	0	0	0	0	0	0	0	0	0	0	0	0	0	0
Ocrl	0.02	0.08	0.03	0	0	0	0	0	0	0	0	0	0	0	0	0	0
Wdr27	0	0	0	0	0	0	0.09	0.28	0.02	0	0	0	0	0	0	0	0
Tgfbr1	0	0.12	0	0	0	0.4	0.05	0	0	0	0	0	0	0	0	0	0.17
Scn9a	0.22	0	0	0.14	0	0	0	0	0	0	0.14	0.44	0	0	0	0	0
Strbp	0.1	0	0.08	0	0	0	0	0	0	0	0	0	0	0	0	0	0
Slc27a4	0.2	0.07	0	0	0	0	0	0	0	0	0	0	0	0	0.07	0	0
Ank1	0.64	0.09	0.22	0.68	0	0	0	0	0	0	0	0	0	0	0.15	0	0
Morn1	0	0.11	0.38	0	0	0	0	0	0	0	0	0	0	0	0	0	0
Plekha1	0	0	0.05	0.04	0	0	0	0	0	0	0	0.02	0	0	0.11	0.01	0
Pcdh19	0	0	0	0	0	0.4	0	0	0.22	0.43	0.28	0.16	0.08	0	0.25	0.04	0
Prex2	0	0	0.65	0.77	0	0	0.39	0	0	0	0	0.48	0	0	0	0	0
Kcnj1	0.22	0.73	0	0.02	0	0	0	0	0	0	0	0	0.3	0.14	0.23	0	0
Csmd2	0	0.17	0	0	0	0.2	0.15	0	0.18	0.11	0.22	0.08	0	0	0	0	0
Pde4b	0.17	0.13	0	0	0	0.17	0	0	0	0.18	0.14	0.17	0	0	0	0	0
Slc39a13	0	0	0	0.02	0	0	0.01	0	0	0	0	0	0	0	0.05	0	0
Rab8b	0	0.14	0	0	0	0	0	0	0	0	0	0	0	0	0	0.06	0
Kl	0	0.28	0.61	0	0	0	0	0	0	0	0	0.01	0.99	0.54	0	0	0
Bmt2	0	0	0	0	0	0.02	0	0	0	0	0	0.02	0.1	0	0	0.01	0
Ptar1	0	0	0	0	0	0	0	0	0.02	0	0	0	0	0	0.2	0.07	0
Rabgap1l	0	0.18	0.11	0.19	0	0.14	0.19	0	0.16	0.16	0	0.09	0	0	0	0.11	0
Egfr	0	0	0	0	0	0	0	0.19	0.22	0.43	0.86	0.71	0	0	0	0	0
Lvrn	0	0	0	0	0	0	0	0	0	0	0.72	0	0	0	0	0.52	0
Nts	0	0.75	0	0.44	0	0	0.09	0	0	0	0	0	0	0	0	0.07	0
Zbtb46	0	0	0	0.21	0	0	0	0.13	0.03	0	0	0	0	0	0	0	0
Rhag	0	0	0	0	0.05	0	0	0	0	0	0.89	0	0	0.46	0	0.81	0.53
Klhl13	0	0	0	0	0	0	0.09	0	0	0	0	0.81	0	0	0	0.06	0
Wscd2	0	0	0	0	0	0.23	0	0.21	0	0.21	0	0	0	0	0	0	0
Rrp36	0.11	0.11	0.16	0	0	0	0	0	0	0	0	0	0	0	0	0	0
Pld5	0	0	0	0	0	0.06	0	0	0.1	0.18	0	0.18	0	0	0.22	0	0
Gria3	0.25	0.16	0.3	0	0	0.14	0	0	0.05	0	0	0	0	0	0	0	0
Gpr139	0.54	0	0.43	0.12	0	0	0.27	0	0	0	0	0.07	0	0	0	0	0
Ccdc88c	0	0.68	0	0	0	0	0	0	0	0	0	0.33	0	0	0	0.06	0
Stap2	0.09	0.53	0.62	0	0	0	0	0	0	0	0	0	0	0	0	0	0.65
Gramd1b	0.18	0	0.02	0	0	0	0	0	0	0	0	0	0	0	0	0	0
Cacna1e	0.15	0	0.02	0	0	0.09	0	0.22	0.26	0.23	0	0	0	0.05	0	0	0
Grm4	0.7	0.11	0	0.35	0	0.19	0.58	0	0	0	0	0	0	0	0	0	0
Tmem237	0	0	0	0	0	0	0	0.28	0.09	0	0	0	0	0	0	0	0
Tfr2	0.28	0.54	0.34	0	0	0.07	0	0	0	0	0	0	0	0	0	0	0
Snph	0.14	0	0	0.04	0	0.1	0	0	0	0	0	0	0	0	0	0	0
Etl4	0.06	0	0	0	0	0	0	0	0	0	0	0.5	0.85	0.52	0	0	0
Grik1	0.06	0	0	0.2	0.14	0	0	0	0	0	0	0	0.56	0	0.02	0.23	0
Cabp4	0.25	0.06	0.1	0.2	0.72	0	0	0.11	0	0	0	0	0	0	0	0	0
Manba	0	0	0	0	0	0	0	0	0	0	0.04	0.07	0.09	0.01	0	0	0
Slc22a1	0.63	0.32	0	0	0	0	0.09	0	0	0	0.86	0	0	0	0	0	0
Col4a5	0.64	0.12	0.38	0	0.45	0	0	0	0	0	0	0	0	0.15	0	0.13	0
Pwwp2a	0	0	0	0	0	0	0	0.23	0.41	0.16	0.04	0.07	0	0.05	0	0	0
Sned1	0.31	0.15	0.2	0.07	0	0.05	0.09	0	0	0	0	0	0	0	0	0	0.1
9-Sep	0.53	0.31	0.1	0	0	0	0	0	0	0	0	0.4	0	0	0	0	0
Vwc2l	0.53	0	0	0	0	0.04	0	0	0.27	0.23	0	0	0	0	0.41	0	0
Chst1	0	0.02	0	0	0	0	0	0	0.09	0	0	0	0	0	0	0	0
Grin3a	0	0	0	0	0	0.63	0	0.21	0.62	0.43	0	0	0.01	0.04	0	0.04	0
Olfm1	0.07	0.12	0	0.37	0	0	0	0	0	0	0	0	0	0	0	0	0
Hectd2	0.42	0.19	0.19	0.17	0	0.08	0.17	0	0	0	0	0	0	0	0	0.04	0.07
Farp2	0	0	0	0	0	0	0	0	0.08	0.16	0	0	0	0	0	0	0
Zfp462	0	0	0	0.11	0	0	0.01	0	0	0.08	0	0	0.2	0.04	0	0	0
Slc35d1	0	0	0.16	0.04	0	0	0	0.11	0	0	0	0	0	0	0	0	0
Slco3a1	0.13	0	0	0	0	0.21	0	0	0	0.04	0	0	0	0.16	0	0	0
Car10	0.19	0	0	0	0	0.21	0.2	0.19	0.13	0.16	0.17	0	0	0	0	0.2	0
Cdk6	0	0	0	0.15	0	0.91	0	0	0.2	0.21	0	0	0	0	0.6	0.03	0
Gda	0	0	0	0	0	0	0	0.12	0.06	0.13	0	0.14	0.1	0	0	0	0
Srd5a3	0	0.07	0.03	0	0	0	0	0	0	0	0	0	0	0	0	0	0
Myo7a	0.18	0.03	0	0	0	0.71	0.33	0	0	0	0	0	0	0	0	0	0.06
Ttf1	0.05	0.07	0	0	0	0	0	0	0	0	0	0	0	0	0	0	0
Hey2	0	0	0.06	0	0	0	0	0	0	0	0.28	0.93	0	0.65	0	0	0
Cbr4	0.2	0	0	0.14	0	0	0.02	0	0	0	0	0	0	0	0	0	0.23
P2rx7	0	0	0	0.03	0	0	0	0	0	0	0.93	0.92	0	0	0	0	0
Chd7	0	0	0	0	0	0	0	0	0	0	0.94	0.36	0	0.03	0	0.36	0
Pou6f2	0.95	0.15	0.98	0.17	0	0	0	0	0	0	0	0	0	0	0	0	0
Slc15a1	0	0.32	0	0	0	0.22	0	0	0.68	0.9	0	0	0	0	0	0	0
Dgki	0.23	0.22	0	0.22	0	0.14	0	0	0	0	0	0	0	0	0	0.13	0
Serinc5	0	0.47	0.62	0.32	0	0	0	0	0	0	0	0	0	0	0	0	0
Trps1	0.08	0	0	0	0	0	0	0	0	0	0.12	0.06	0.75	0	0.09	0.09	0
Srpx2	0	0	0	0	0	0	0	0	0.5	0.66	0	0	0	0	0	0	0
Crhr1	0.96	0.69	0.19	0	0	0.14	0	0	0	0	0	0	0	0	0	0	0
Sec63	0	0	0	0	0	0	0	0	0	0	0	0	0.12	0	0	0	0
Satb2	0	0.6	0	0	0	0.53	0.25	0.02	0.57	0	0	0	0	0	0	0.09	0.57
Fign	0	0	0	0	0	0.07	0	0.38	0.21	0.81	0.21	0.32	0	0	0	0.13	0
Ddah1	0	0	0	0	0	0.13	0	0	0.05	0	0	0.42	0	0	0	0	0
Tcaim	0	0	0.09	0	0	0	0	0	0	0	0	0	0	0	0	0	0
Ism2	0.49	0	0	0.63	0	0	0	0.59	0	0	0	0	0	0.34	0	0	0
Ccdc77	0.29	0.2	0.21	0	0	0	0	0	0	0	0	0	0	0	0	0	0
Reln	0	0	0	0	0.11	0	0	0	0.15	0	0.91	0.09	0	0	0	0	0
Cdh12	0	0	0	0	0.32	0	0	0.05	0.27	0.63	0	0.9	0	0	0	0	0
Syndig1	0	0	0	0	0	0	0	0	0.87	0.62	0.52	0	0	0	0	0	0
Aatf	0	0.06	0.01	0	0	0	0	0	0	0	0	0	0	0	0.01	0.06	0
Smarca1	0.07	0.03	0.64	0	0	0	0	0	0	0	0	0	0	0	0	0	0
Galnt11	0.07	0	0	0.14	0	0	0	0	0	0	0	0	0	0	0	0	0
Ttll10	0	0	0	0	0	0	0	0.42	0.19	0	0	0	0	0	0	0.1	0
Trp53bp1	0	0.02	0	0	0	0	0	0	0	0	0.13	0.05	0	0	0	0	0
Phkb	0	0	0	0	0	0.14	0	0.08	0.03	0.21	0.02	0	0	0	0.18	0	0
Epb41l4a	0.34	0.6	0.09	0	0	0	0	0	0	0	0	0	0	0	0.2	0	0
Creb3l1	0.53	0.65	0.86	0.24	0.05	0	0	0	0	0	0	0	0	0	0	0	0
Cyb5r4	0	0.05	0	0	0	0.2	0	0	0	0	0	0	0	0	0	0	0
Wdr70	0.12	0.09	0	0	0	0.16	0	0	0	0	0	0	0	0	0	0	0
Zfp804b	0	0	0	0.63	0	0	0.53	0	0	0	0.32	0	0	0	0.19	0.81	0.54
Pdk1	0	0.02	0	0	0	0	0	0	0	0	0	0.31	0.21	0	0	0	0
Lamb1	0	0	0	0	0	0	0	0	0	0.16	0	0	0.41	0.62	0	0	0
Nrg4	0.22	0	0	0	0	0	0	0	0	0	0	0	0.09	0	0.13	0.04	0
Cep112	0	0	0	0	0	0	0	0	0.06	0.09	0.2	0.2	0.16	0.17	0.02	0.09	0
Vti1a	0.07	0.15	0.14	0	0	0.12	0.12	0	0	0.12	0	0	0	0	0	0	0
Cpz	0.84	0.09	0.13	0.25	0	0	0.67	0.17	0	0	0	0	0	0	0	0	0
Rgs17	0	0	0	0	0	0	0	0	0	0	0.09	0	0	0.02	0	0.19	0
Mycbp2	0.02	0.23	0.14	0.21	0	0.12	0.2	0	0.13	0	0	0.12	0.03	0	0	0.18	0
Htr3a	0.32	0	0	0	0	0	0.11	0	0	0	0.68	0	0	0	0	0.82	0
Rhbdd2	0	0	0	0.05	0	0	0	0	0	0	0.05	0.07	0	0	0	0	0
Micall1	0.07	0.11	0	0	0	0	0	0	0	0	0	0	0	0	0	0	0
Lhpp	0.11	0.13	0.04	0	0	0	0	0	0	0	0	0	0	0	0	0	0
Rassf5	0.32	0.14	0	0	0	0	0	0	0.01	0	0	0	0	0	0	0	0
Tcea3	0	0	0	0	0	0	0	0	0.43	0.89	0	0	0	0	0.48	0	0
Sv2b	0	0	0	0	0	0	0.01	0.44	0.74	0.19	0.55	0	0	0	0	0.37	0
Snx18	0.01	0	0	0	0	0.25	0	0	0	0	0	0	0	0	0	0	0
Sema6a	0	0	0	0.77	0	0	0.32	0	0	0	0	0.41	0.13	0.18	0	0	0
Cpne5	0	0	0	0	0	0.48	0	0	0	0.14	0	0.09	0	0	0	0	0
Ankrd46	0	0.3	0.08	0	0	0	0	0	0	0	0	0	0	0	0	0	0
Cops6	0.16	0.12	0	0.06	0	0	0.04	0	0	0	0	0	0	0	0	0	0
Smad3	0	0	0	0	0	0	0	0	0	0	0	0.22	0.92	0.86	0	0.05	0
Zfand4	0.01	0	0	0.21	0	0	0.01	0	0	0	0	0	0	0	0	0	0
Btbd11	0	0	0	0	0	0.04	0	0	0.64	0.22	0.13	0	0	0	0	0	0
Txndc16	0.03	0	0	0	0	0	0	0	0	0	0	0	0	0	0.1	0	0
Vrk1	0.2	0.11	0.09	0	0	0	0	0	0	0	0	0	0	0	0	0	0
Unc5b	0	0	0	0	0	0	0.11	0.25	0	0	0.72	0	0	0	0.4	0	0
Tuba8	0.26	0	0	0	0	0	0.11	0	0	0	0	0	0	0.14	0	0	0
St6galnac5	0	0.64	0	0	0	0.62	0	0	0	0	0	0	0	0.1	0	0.36	0
Sst	0.57	0.69	0.74	0	0	0	0	0	0	0	0	0	0	0	0	0	0
Cblb	0.02	0	0	0.43	0	0	0	0	0	0	0.02	0.1	0	0	0	0	0
Rspo3	0	0	0	0	0	0.66	0	0	0.09	0	0.34	0	0	0	0	0.61	0
Nab1	0	0	0	0	0	0	0	0	0.15	0.01	0.25	0	0	0	0	0.08	0
G0s2	0	0	0	0	0	0.22	0	0	0.48	0	0.69	0	0	0	0	0.27	0
Efnb3	0	0	0	0	0	0	0	0.01	0.08	0	0	0	0	0	0	0	0
Col2a1	0.72	0	0.25	0.92	0	0	0	0	0	0	0.05	0	0	0	0.47	0	0
Med14	0	0	0	0.05	0	0	0	0	0	0	0	0	0	0	0	0.14	0
Per2	0	0	0	0	0	0	0	0	0	0	0.42	0.06	0	0	0	0.62	0
Arhgap12	0	0	0.05	0	0	0	0	0	0	0.03	0	0.23	0.11	0	0	0	0
Ptprm	0	0	0	0	0	0	0	0	0.05	0.14	0	0	0.23	0.33	0	0.11	0
Spry2	0.2	0	0	0.06	0	0	0	0	0	0	0.68	0	0	0	0	0.49	0.47
Coro2b	0	0	0	0	0	0	0	0	0	0.13	0	0	0.07	0.08	0	0	0
Nell2	0.19	0.05	0.07	0.22	0	0	0.01	0	0	0	0	0.21	0	0.21	0	0	0
Scai	0.02	0	0.11	0.17	0	0	0.11	0	0	0	0	0	0.04	0	0	0	0
Vcan	0.01	0	0	0	0.13	0	0	0	0	0	0.07	0.9	0.96	0.3	0	0	0
Mbnl3	0	0.29	0.33	0.2	0	0	0.74	0	0	0	0	0	0.51	0.56	0	0	0
Syt16	0	0.11	0	0.14	0	0.01	0.08	0	0.06	0.07	0	0	0	0	0	0.01	0
Cttnbp2nl	0	0.01	0	0	0	0	0	0	0	0	0	0	0	0	0	0.13	0
Mapk4	0	0	0	0	0	0	0	0	0.44	0	0	0	0.31	0.22	0	0	0
Grik4	0	0.2	0.06	0	0	0.2	0.05	0	0.04	0	0.13	0	0	0.02	0	0	0
Sfmbt2	0	0.22	0	0	0	0.04	0	0	0	0	0	0.14	0	0.16	0	0	0
Nrg1	0	0	0	0	0	0.22	0.01	0.03	0	0	0	0	0.23	0	0	0.18	0.15
Plekhm3	0	0	0.03	0	0	0.04	0	0	0	0	0	0.09	0.13	0.04	0	0	0
Rorb	0	0	0.17	0.78	0	0	0.98	0	0	0	0	0	0	0	0	0	0.39
Ndnf	0	0	0	0	0	0	0	0	0	0	0.61	0.98	0	0.47	0	0	0
Dst	0	0.13	0.01	0.17	0	0.16	0.2	0.03	0.19	0.21	0.04	0	0	0	0	0.13	0
Bcl2l11	0.87	0	0.42	0.33	0	0	0	0	0	0	0.06	0.42	0	0	0	0.34	0
Pard6g	0	0.68	0	0.08	0	0.02	0	0	0	0	0	0.08	0	0	0	0	0
Naalad2	0	0	0	0.21	0.08	0	0	0	0	0	0.17	0.09	0.13	0.04	0.08	0	0
Dclk3	0.05	0	0	0	0.03	0.35	0.21	0	0	0.03	0	0	0	0	0	0	0.56
Napepld	0	0	0	0	0	0	0	0	0	0	0	0.53	0	0.2	0	0	0
Agbl4	0	0.18	0	0	0	0.2	0.16	0	0.22	0.17	0.16	0.24	0.2	0	0	0.2	0
Ccdc171	0	0	0	0	0	0.07	0	0	0	0.06	0	0.36	0.41	0	0	0	0
Ltbr	0	0.26	0	0	0	0	0	0	0	0	0	0.62	0	0	0	0	0
Tiparp	0	0.17	0	0	0.2	0	0	0	0	0	0.1	0	0	0	0	0.54	0
Esyt2	0.14	0	0	0	0	0	0	0	0	0	0	0	0	0	0	0	0.19
Ak7	0	0	0.14	0	0	0.06	0.06	0.48	0.04	0	0	0	0	0	0	0	0
Thbs4	0	0	0.9	0.96	0	0	0.58	0	0	0	0	0	0	0	0	0	0
Alox5	0.55	0.36	0.57	0	0	0	0	0	0	0	0	0	0	0	0	0	0.13
Gipc1	0	0.15	0	0	0	0	0	0	0	0	0	0	0	0	0	0	0
Rps6ka2	0	0	0	0	0	0.22	0	0.24	0.46	0.27	0.19	0.17	0	0.09	0.04	0	0
Slc38a10	0.45	0.22	0.17	0	0	0	0	0	0	0	0	0	0	0	0	0	0
Dera	0	0	0	0	0	0	0	0	0.62	0.1	0.07	0.08	0	0	0	0.15	0
Coro2a	0.41	0.06	0	0	0	0	0.05	0	0	0	0	0	0	0	0	0	0
Dscam	0.21	0.19	0	0.24	0	0	0.24	0	0.23	0.14	0.2	0	0.18	0.18	0	0.22	0
Cmya5	0.16	0	0	0	0.76	0	0	0.27	0.4	0	0	0	0	0	0	0	0
Stmn1	0	0	0	0	0	0	0.01	0	0	0	0.03	0.03	0	0.07	0	0	0.14
Prss53	0	0.05	0	0	0	0	0	0	0	0	0	0	0	0	0	0	0
Rexo2	0	0	0	0	0	0	0	0	0.2	0.48	0.07	0	0	0	0	0.03	0
Hsf4	0	0.05	0	0	0	0.22	0	0	0.32	0	0	0	0.45	0	0	0	0
Adamts3	0	0	0	0	0	0	0	0	0	0.79	0.96	0	0.16	0	0	0	0
Pkd2	0	0	0	0.2	0	0	0	0	0	0	0	0	0	0	0	0.18	0
Zeb1	0.05	0	0.1	0	0	0	0	0	0	0.04	0.17	0.07	0.12	0	0.02	0	0
Fam13b	0	0.26	0.26	0	0	0	0	0	0	0	0	0	0	0	0	0	0
Pcca	0	0	0.01	0.09	0	0	0	0	0	0	0	0.08	0.05	0	0	0.01	0
Fancc	0.02	0.12	0.12	0	0	0.12	0	0	0	0.04	0	0.18	0.1	0	0	0	0
Cers4	0.01	0	0	0.11	0	0	0	0	0	0	0	0	0	0	0	0	0
Crim1	0	0.19	0	0	0	0	0	0	0	0	0	0	0	0	0	0	0
Asap2	0	0	0	0.09	0	0	0.18	0	0	0.11	0	0	0	0	0	0.15	0
Tmpo	0	0	0	0	0	0	0	0	0.05	0	0	0.27	0.8	0.6	0	0	0
Exph5	0.23	0	0	0.06	0	0	0	0	0	0	0	0	0	0	0	0	0
Aig1	0	0	0.02	0.22	0	0	0.18	0	0	0	0	0	0.03	0	0	0.01	0
Nme4	0.24	0.01	0	0.05	0	0	0	0	0	0	0	0	0	0	0	0	0
Nxph1	0	0	0.04	0.19	0	0.24	0.11	0	0	0	0.12	0	0.12	0.22	0	0.2	0.08
Rprm	0	0.17	0	0.85	0.74	0.32	0.51	0	0	0	0	0	0	0	0	0	0
Dcc	0.4	0	0.35	0	0	0	0	0	0	0	0.28	0.67	0.66	0.15	0.14	0	0
Utrn	0	0.23	0	0	0	0.78	0.76	0	0	0	0	0	0	0	0	0.07	0.64
Fancb	0	0	0.32	0	0.9	0	0.19	0	0	0.16	0	0	0	0	0.11	0	0
Cep72	0	0.59	0.14	0.03	0	0.53	0.04	0	0.02	0	0	0	0	0	0	0	0
Gabbr2	0.16	0	0	0	0	0	0	0	0	0	0.17	0.03	0.04	0.12	0	0.15	0
Sfrp1	0.29	0.23	0.87	0	0	0	0	0	0	0	0	0	0.5	0	0	0	0
Sugct	0	0	0	0.14	0	0	0	0	0	0	0.06	0.05	0	0	0	0.01	0
Cyb5b	0	0	0.03	0	0	0	0	0	0	0	0	0	0	0	0	0	0.14
Mrps6	0	0	0	0	0	0	0	0	0.11	0.04	0.19	0.09	0.02	0	0	0.13	0
Bmp2k	0.15	0	0.07	0	0	0	0	0	0	0	0	0	0	0	0	0	0
Nlrp12	0.32	0.68	0.9	0.76	0	0	0	0	0	0	0	0	0	0	0	0	0
Bmp3	0	0	0	0	0	0.13	0	0	0	0.5	0.46	0.39	0.85	0.27	0.33	0.15	0
Thbs2	0	0	0	0	0	0.96	0.26	0	0.19	0.43	0.46	0	0	0	0	0.29	0
Ntrk2	0	0.15	0.17	0	0	0	0	0	0	0	0.16	0.18	0.14	0	0	0.19	0
Nrip3	0.23	0.11	0.19	0.43	0	0	0	0	0	0	0	0	0	0	0	0	0
Aatk	0	0	0	0.09	0	0	0	0	0	0	0	0	0	0	0	0	0
Anxa5	0	0	0	0.17	0.09	0	0.17	0	0	0	0	0	0	0	0	0.11	0.06
Npffr1	0	0	0	0.94	0	0	0.47	0	0	0	0.4	0	0	0	0	0	0
Scn1a	0	0	0	0.06	0	0	0	0	0	0.11	0	0	0	0.12	0	0.12	0
Klf8	0	0	0.42	0	0	0	0.11	0	0	0	0	0	0	0	0	0	0
Tmem178	0.45	0	0	0.2	0.05	0	0	0	0	0	0.1	0.37	0	0	0	0	0
Ddx17	0	0	0	0	0	0	0	0	0	0	0	0	0.16	0.02	0	0.07	0
L1cam	0	0	0.29	0.1	0	0	0	0	0	0	0	0	0	0	0	0	0
Dnah12	0.01	0	0	0	0	0	0	0.1	0.36	0	0.05	0	0	0	0	0	0.71
Pepd	0.04	0.03	0	0.1	0	0	0.06	0	0	0	0	0	0	0	0	0	0
Ryr2	0	0.05	0.18	0.1	0	0.24	0.21	0.21	0.19	0.21	0	0	0	0	0	0.18	0
Sgsm3	0.1	0.02	0	0.08	0	0	0	0	0	0	0	0	0	0	0	0	0
Tagln	0.03	0.21	0.66	0	0	0	0	0	0	0	0	0	0	0	0	0	0.09
Syne1	0	0	0	0	0	0	0.05	0	0.11	0.19	0.17	0.13	0.17	0.15	0	0.06	0
Hpse2	0.11	0	0	0	0	0	0	0	0	0	0	0	0	0	0	0	0
Ttyh2	0	0.5	0	0	0	0.18	0	0	0.26	0.23	0	0	0	0	0	0	0
Ankrd6	0	0	0	0	0	0	0	0	0.14	0.02	0	0.04	0	0	0	0	0
Rbm47	0	0.26	0	0	0	0.19	0.37	0	0	0	0	0	0	0	0	0.03	0.89
Rasgrf2	0	0	0	0	0	0.2	0	0.19	0.38	0.34	0	0.15	0	0	0.16	0.14	0
Galnt3	0	0	0	0	0	0	0	0	0.57	0.36	0.46	0	0	0	0	0	0
Cryl1	0	0.07	0.19	0.07	0	0	0	0	0	0	0	0	0	0	0	0	0.02
Cep83	0	0	0	0	0	0	0	0	0	0	0.04	0.08	0.42	0.01	0	0	0
Prkd1	0	0	0	0	0	0.55	0	0.35	0.69	0.82	0	0	0	0	0	0.24	0
Nfix	0	0	0	0	0	0	0	0	0	0	0.99	0.93	0	0	0	0	0
Nrcam	0	0	0	0.22	0	0	0.02	0	0.1	0.05	0.11	0.19	0	0	0	0.06	0
Ahi1	0	0.15	0	0	0	0.19	0.08	0.05	0.23	0.21	0.05	0	0.09	0	0.02	0.24	0
Akt3	0	0	0	0.19	0	0.11	0.13	0	0	0	0.09	0.23	0.2	0.14	0	0	0
Osbpl6	0	0.01	0	0	0	0	0.15	0	0.12	0.07	0	0	0	0	0	0.04	0
Lsamp	0.1	0.15	0	0	0	0.24	0.22	0.13	0.23	0.18	0.09	0	0	0	0	0.18	0.04
Car8	0	0	0	0	0.02	0	0	0.38	0.48	0.04	0	0	0	0.02	0	0	0
Glud1	0	0	0	0	0	0	0	0	0	0	0	0	0	0	0	0	0
Il1rapl2	0	0.94	0.58	0	0	0	0	0	0	0	0.22	0	0	0.06	0	0	0
Mid1	0	0	0	0	0	0	0	0.01	0.5	0	0.09	0.25	0	0	0	0	0
St7	0.07	0.14	0.03	0	0	0.16	0	0	0	0	0	0	0	0	0	0	0.14
Hhipl1	0.61	0.52	0.04	0	0	0	0	0	0	0	0.4	0	0	0	0	0	0.24
Frmpd2	0	0	0	0	0.07	0	0	0	0.78	0.55	0	0	0	0	0	0	0
Dnmt3a	0	0	0	0	0	0.08	0	0	0	0.08	0	0	0	0	0	0	0
Cpt1a	0	0.18	0.13	0	0	0.41	0	0	0.01	0.1	0	0	0	0	0	0	0
Plekhb1	0	0	0	0.21	0	0	0.15	0	0	0	0	0	0	0	0	0	0
Tshr	0	0	0.22	0	0	0	0	0	0	0	0.94	0	0	0	0	0	0
Bin1	0	0	0	0.08	0	0	0	0	0	0	0	0	0	0	0	0	0.23
Heg1	0.81	0.19	0.27	0.82	0	0	0.29	0	0	0	0	0	0.02	0	0	0	0
Rab39	0	0.03	0.22	0.44	0	0	0	0	0	0	0.38	0.08	0.32	0.09	0	0	0
Nr6a1	0	0	0.05	0	0	0.23	0	0.08	0.37	0.24	0	0	0.13	0.21	0	0	0
Trim9	0.17	0.16	0	0.07	0	0.06	0.12	0	0.06	0	0	0	0	0	0	0.17	0
Frmd4a	0.2	0.2	0	0.02	0	0.12	0.22	0	0.23	0.21	0.23	0.21	0.15	0.01	0	0.14	0
Tcaf1	0	0	0	0	0	0	0	0	0	0	0	0	0	0	0	0.09	0
Tpm3	0	0	0	0	0	0	0	0.2	0	0	0	0	0.02	0.19	0	0	0
Myc	0.29	0.45	0.65	0	0	0.2	0	0	0	0	0	0	0	0	0	0.02	0.1
Kcnmb4	0.04	0	0.46	0	0	0.14	0	0	0.1	0.09	0	0	0	0	0	0	0
Kbtbd12	0	0	0	0	0	0	0	0	0.48	0.77	0	0.31	0	0	0	0	0.07
Gpr22	0.42	0	0.11	0	0.7	0	0.17	0	0	0	0	0	0.06	0	0	0	0
Sufu	0	0	0	0.05	0	0	0	0	0	0	0	0	0	0	0	0	0
Sv2c	0.06	0	0.42	0	0	0	0	0	0.15	0	0	0.6	0	0	0	0	0
Chodl	0	0	0	0	0.08	0	0	0	0	0	0.08	0	0.63	0.8	0.32	0.02	0
Gpr137b	0	0	0.59	0	0	0	0	0	0	0	0	0	0	0	0	0	0
Ntsr1	0	0	0	0.03	0	0	0	0	0	0	0.47	0	0.2	0.06	0.69	0.29	0
Hs3st4	0.22	0.21	0.1	0.21	0	0.17	0.21	0.04	0.18	0	0	0	0	0.22	0	0	0
Cux1	0	0.08	0	0.07	0	0.17	0.13	0	0.09	0.15	0	0	0	0	0.12	0.1	0
Btbd1	0	0.02	0.11	0	0	0	0	0	0	0	0	0	0	0	0	0	0
Tmem266	0.16	0	0	0	0	0	0	0	0	0	0	0	0	0	0	0	0
Slc46a2	0.01	0.15	0	0	0.9	0.3	0.37	0	0	0	0	0	0	0	0.34	0	0
Tnks	0	0.21	0.22	0.1	0	0.11	0	0	0	0	0	0	0	0	0	0	0
Ropn1l	0.39	0.32	0.34	0	0	0	0	0	0.14	0	0	0	0	0	0	0	0
Syn3	0	0.06	0	0	0	0.33	0.16	0	0	0	0.09	0	0	0.15	0	0.29	0
Rapgef3	0	0.35	0	0	0	0.12	0	0	0	0	0	0	0	0	0	0	0
Vim	0	0	0	0	0	0	0.16	0	0.58	0.11	0	0	0	0.51	0	0.8	0
Ptprb	0.07	0.01	0	0	0	0	0	0	0	0	0	0	0	0	0.07	0	0
Cadm1	0.22	0.04	0.22	0	0	0	0	0	0.15	0.12	0.05	0	0	0	0	0.01	0
Nr4a3	0	0	0.04	0	0	0	0	0	0	0	0.4	0	0	0	0	0.96	0
Lrrc3b	0.3	0.18	0.4	0	0	0.06	0	0	0	0	0	0	0	0	0	0	0
Man1a2	0	0	0.48	0	0	0	0	0	0	0	0	0	0	0	0	0	0
Bmpr1b	0	0	0	0	0	0.02	0.5	0.31	0.51	0.98	0	0	0	0	0.17	0	0
Adarb1	0	0	0	0	0.05	0.18	0	0	0	0	0	0	0	0	0	0	0
Fgf5	0	0	0	0.03	0	0	0	0	0	0.22	0.97	0	0	0	0	0	0
Slc12a2	0	0	0	0.16	0	0	0	0	0	0	0	0	0	0.04	0	0	0
Smco4	0	0.31	0.28	0	0	0	0	0	0.44	0.03	0	0	0	0	0	0	0
Gria1	0.2	0.17	0.03	0.19	0	0.23	0.23	0	0.18	0	0	0	0	0.19	0	0.08	0.13
Lpcat2	0.02	0.2	0	0	0	0.23	0	0	0	0	0	0.61	0	0	0.39	0.08	0
Pdia5	0.04	0.21	0.52	0	0	0	0	0	0	0	0.05	0.38	0	0	0	0	0
Usp6nl	0	0.44	0.5	0	0	0	0	0	0	0	0	0	0	0	0	0	0
Tmem63c	0	0	0	0	0	0.09	0	0	0	0	0	0	0	0	0	0	0
Tmem191c	0.27	0	0	0	0	0	0	0	0	0	0	0	0	0	0	0	0
Efemp2	0.15	0	0.2	0.17	0	0	0.15	0	0	0	0	0	0	0	0.41	0.06	0.88
Arhgap40	0	0.57	0	0	0	0.61	0	0	0.52	0	0	0	0	0	0	0	0.1
Flna	0	0.52	0.33	0	0	0.06	0	0	0	0	0	0	0	0	0	0	0
Fam13c	0	0	0	0	0	0	0	0	0	0	0.03	0	0	0	0.02	0	0
Pdlim7	0.07	0	0	0	0	0	0.28	0.19	0.67	0.05	0	0	0	0.36	0	0	0
Nbea	0	0.21	0	0.15	0	0.12	0.2	0	0.2	0.11	0.18	0	0.14	0.08	0.02	0.23	0
Rab9b	0.12	0	0	0	0	0	0	0	0	0	0.06	0	0.51	0.25	0	0	0
Antxr2	0	0.66	0.03	0	0	0	0	0	0	0	0	0	0.87	0	0	0	0
Myo1b	0.1	0	0	0	0	0.04	0	0.12	0.65	0.05	0.61	0	0	0	0	0.15	0
Ndst4	0.57	0	0	0	0.3	0	0	0	0.1	0	0	0	0	0	0.89	0.1	0
Pam	0	0	0	0	0	0	0	0	0.02	0	0.17	0.16	0	0	0	0.19	0
Gprin3	0	0.1	0.21	0	0	0	0	0	0	0	0.14	0.04	0	0	0	0	0
Ano6	0	0.18	0.6	0	0	0	0	0	0	0	0	0.09	0.07	0	0	0	0
Eif2ak2	0	0	0	0	0	0.12	0	0	0	0	0	0	0	0	0	0	0
Ntf3	0	0	0.81	0	0	0.06	0	0	0	0	0.66	0	0	0	0	0	0
Eif4ebp1	0	0.2	0.47	0.16	0.24	0	0.14	0	0	0	0	0.07	0	0	0	0	0.73
Tmem26	0	0	0	0	0	0	0	0	0	0	0.22	0.91	0.62	0	0	0.66	0
Slc9a7	0.25	0.08	0.13	0	0	0	0	0	0	0	0	0	0	0	0	0	0
Rgs20	0	0	0	0.12	0	0	0.35	0	0	0	0.81	0	0.05	0	0	0.61	0
Mpped2	0	0	0.55	0	0	0	0	0	0	0	0	0.01	0.91	0.81	0	0.16	0
Igdcc4	0.17	0	0	0	0	0	0	0	0.19	0	0	0	0	0	0.55	0	0
Rab3gap1	0	0	0	0	0	0	0	0	0	0	0	0	0.14	0	0	0	0
Emcn	0.43	0.28	0.14	0	0.94	0	0.56	0	0	0	0	0	0	0	0	0	0
Asap3	0	0	0	0	0	0	0	0	0.75	0.97	0	0	0	0	0.9	0.08	0
Dlg5	0	0	0	0	0	0	0	0.04	0.04	0	0.04	0	0	0	0	0	0
Tfcp2	0	0	0.04	0	0	0	0	0	0	0	0	0	0	0	0	0.07	0
Cntn1	0.02	0	0	0.02	0	0.14	0.03	0	0	0	0	0.18	0.05	0	0	0	0
Prdm12	0	0	0	0	0	0	0	0	0	0	0	0.63	0	0.99	0	0	0
Kctd1	0	0	0	0	0	0	0	0	0	0	0	0.18	0.03	0.13	0	0	0
Arhgap25	0	0	0	0	0	0	0.57	0.94	0.69	0.17	0	0	0	0	0	0.1	0
Baz2b	0	0	0	0.05	0	0	0.05	0	0	0	0	0.18	0.12	0	0	0	0
Fgf1	0.31	0	0	0.31	0	0	0.13	0.43	0.28	0	0	0	0	0	0	0.02	0
Spry1	0	0	0.56	0	0.14	0	0	0	0	0	0.77	0	0	0.03	0	0	0
Scn8a	0	0	0	0	0	0.11	0.05	0	0.11	0.12	0	0	0.03	0	0	0.1	0
Shank2	0	0.14	0	0	0	0.17	0	0.1	0.14	0.21	0	0	0	0.1	0.02	0	0
Wipf1	0	0	0	0	0	0.05	0	0	0	0	0	0	0.65	0	0	0.06	0
Ldhd	0.21	0.27	0.38	0.02	0	0	0	0	0	0	0	0	0	0	0	0	0
Gpld1	0.43	0.05	0.11	0	0	0	0	0	0	0	0	0	0	0	0	0	0
1700025G04Rik	0.11	0.67	0.17	0.16	0	0	0.1	0	0	0	0	0	0.13	0.02	0	0	0
Adamtsl1	0	0.12	0.64	0	0	0.47	0	0	0	0	0	0	0.97	0	0	0	0
Map3k5	0	0	0	0	0	0	0	0.15	0.55	0.32	0.1	0	0.28	0.32	0.09	0.01	0
Fanca	0.19	0.06	0	0.05	0	0	0	0	0	0	0	0	0	0	0	0	0
Chsy3	0.19	0	0.1	0	0	0.25	0	0.21	0.11	0.17	0	0	0	0	0	0	0
Zc3h12c	0	0	0	0	0	0	0	0	0	0	0	0	0	0	0	0.2	0
Grin2b	0	0.06	0	0.14	0	0.05	0.06	0	0.05	0.09	0.01	0.05	0.16	0.14	0	0.13	0
Nfe2l2	0	0	0	0	0	0	0	0	0	0	0.45	0.21	0	0	0	0.19	0
Thnsl2	0	0	0	0.07	0	0	0.19	0	0	0	0	0	0	0	0	0	0.74
Chga	0	0.13	0.43	0	0	0	0	0	0	0	0	0	0.01	0.13	0	0.06	0
Fbxo15	0	0.37	0.12	0	0	0.07	0	0	0	0	0	0	0	0	0.03	0	0
Tub	0	0	0	0	0	0	0	0	0	0.08	0	0	0	0	0	0	0
Pde1b	0	0.04	0	0.49	0	0	0.13	0	0	0	0	0	0	0	0	0	0
St8sia4	0	0.25	0	0	0	0.43	0	0	0.37	0	0	0	0	0	0.06	0.24	0
Ptch1	0	0	0	0	0	0	0	0	0.11	0.24	0.01	0	0	0	0	0	0
Cd96	0	0.9	0.65	0	0	0.76	0	0	0	0	0	0	0	0	0	0.1	0
Trit1	0	0	0	0	0	0	0	0	0.06	0	0	0	0	0	0	0	0
Csmd3	0	0.24	0	0.04	0	0	0.16	0.05	0.21	0.19	0	0	0.21	0	0.08	0.22	0
Ppp1r14c	0	0.28	0.47	0.16	0	0	0	0	0	0	0	0	0	0	0.07	0	0
Cep170	0.01	0.04	0.05	0.02	0	0	0	0	0	0	0	0	0	0	0	0	0
Adamts13	0.29	0.37	0	0	0	0.11	0	0	0	0	0	0	0	0	0	0	0
P3h2	0	0	0	0	0	0	0	0.02	0.21	0.14	0.11	0.19	0	0	0	0.08	0
Crym	0	0	0	0	0	0.35	0	0.56	0.61	0.55	0	0	0.04	0.89	0	0	0
Timm22	0	0	0	0	0	0.07	0	0.28	0.1	0.32	0	0	0	0	0	0	0
Sdccag8	0	0	0	0.14	0	0.06	0	0	0	0	0	0	0	0	0	0	0
Pou2f2	0.15	0	0	0.18	0	0	0	0	0	0	0	0	0	0	0	0	0
Hs3st1	0.06	0.69	0.29	0	0	0.24	0	0	0	0	0	0	0	0	0	0.46	0
Brinp2	0.43	0	0	0.65	0	0.06	0.64	0	0	0	0	0.3	0	0	0	0	0
Prkag2	0.19	0.12	0	0	0	0.2	0.06	0	0	0	0	0	0	0	0	0	0
Nfxl1	0	0	0	0.06	0	0	0	0	0	0	0	0	0	0	0	0	0
Cldn3	0.32	0	0	0	0	0	0	0	0.01	0	0.86	0	0.02	0	0	0	0
Ssr3	0	0.05	0	0	0	0	0	0	0	0	0	0.15	0.56	0.01	0	0	0
Fbxl19	0	0.12	0	0	0	0	0	0	0	0	0	0	0	0	0	0	0
Slc24a2	0	0	0	0	0	0	0	0	0.23	0.27	0.01	0	0.69	0.12	0	0	0
B3gat2	0	0	0.12	0.88	0	0	0	0	0	0	0	0.92	0.33	0	0	0	0
Ccnd3	0.01	0.11	0.02	0	0.38	0	0	0	0	0	0	0	0	0	0	0	0
Vwa7	0	0	0	0	0	0	0.18	0	0.17	0	0	0	0	0	0	0.28	0.88
Vps54	0	0	0	0	0	0	0	0	0	0	0	0.12	0.15	0.16	0.06	0.05	0
Miip	0.27	0.32	0.14	0.15	0	0	0	0	0	0	0	0	0	0	0	0	0
Dock3	0	0.24	0.19	0.18	0	0.18	0.18	0	0.18	0.19	0.02	0.1	0.05	0.13	0	0.06	0
Ablim2	0.05	0.03	0	0	0	0.06	0	0	0	0.12	0	0.04	0.19	0.17	0	0	0.03
Vwf	0	0	0	0.1	0.1	0	0.41	0	0	0	0	0	0	0	0	0	0
Abhd3	0.44	0	0	0.81	0	0	0	0	0	0	0	0	0	0	0	0	0
F3	0	0	0.92	0.56	0	0.19	0	0	0	0	0.5	0	0	0	0	0	0
Pinx1	0.01	0	0	0.03	0	0.06	0	0	0	0	0	0	0	0	0	0	0
Unc13d	0.26	0.36	0	0	0	0	0	0	0	0	0	0	0	0	0	0	0.96
Gpr155	0	0	0	0	0	0	0	0	0	0	0	0.43	0.61	0.33	0	0	0
Fam122b	0	0.19	0	0	0	0	0	0	0.08	0	0	0.69	0	0	0	0	0
Pon2	0	0	0	0	0	0	0.42	0.18	0.08	0.18	0	0	0	0	0	0.05	0
Slc36a4	0	0	0	0.15	0	0	0	0	0	0	0.02	0	0	0	0	0	0
Npas2	0	0	0	0	0	0	0.13	0.01	0	0	0	0.06	0	0	0	0	0
Drd2	0	0	0	0	0	0	0	0	0.65	0	0.77	0.13	0.53	0	0	0.4	0
Ncoa2	0	0	0	0	0	0.11	0	0	0	0	0	0	0	0	0	0	0
Rab11fip4	0	0	0	0.12	0	0	0	0	0	0	0	0	0.17	0	0	0	0
Esrrg	0	0	0	0	0	0	0	0	0	0.03	0	0	0	0	0.2	0.04	0
Fgf10	0	0	0	0	0.6	0	0.21	0	0.51	0	0	0	0	0	0	0	0
Eif4a2	0	0	0	0	0	0	0	0	0	0	0	0	0.14	0	0	0	0
Cobl	0	0	0	0	0	0.31	0	0	0.45	0.12	0.47	0	0	0	0	0	0.32
Megf11	0	0	0	0	0	0	0	0.24	0.59	0.36	0.32	0.49	0	0.19	0	0	0
Rap1gds1	0.18	0	0	0	0	0.02	0.05	0	0	0.11	0	0	0	0	0	0.02	0
D1Ertd622e	0	0	0	0	0	0	0	0	0.36	0.02	0	0	0	0	0	0	0
Podn	0.61	0.7	0.83	0.79	0	0	0	0	0	0	0	0	0	0	0	0	0
Pou2f1	0	0	0	0	0	0	0	0	0	0	0.15	0.21	0.16	0.2	0.03	0	0
Prss38	0	0	0	0	0	0	0.16	0	0	0	0	0.28	0.76	0.67	0	0	0
Tsga13	0.09	0.4	0	0.12	0	0	0	0	0	0	0	0	0	0	0	0	0.98
Acyp2	0	0	0	0	0	0.03	0	0	0	0.02	0	0	0	0	0	0	0
Eya4	0.21	0.74	0	0	0	0.17	0	0	0	0	0.26	0	0	0	0.04	0	0
Trip4	0.04	0.06	0.11	0	0	0	0	0	0	0	0	0	0	0	0	0	0
Hsd17b4	0	0	0	0	0	0.08	0	0	0	0	0	0	0	0	0	0	0.04
Cpd	0.13	0	0.09	0	0	0	0	0	0	0	0	0	0.05	0.14	0	0	0
Stard13	0.04	0.16	0.46	0	0	0	0	0	0	0	0.59	0.63	0	0	0.59	0.1	0
Tnip3	0.13	0.2	0	0.45	0	0	0.53	0	0	0	0	0	0	0	0	0.04	0
Fgd3	0	0	0	0	0	0	0.84	0	0.08	0	0	0.06	0	0	0	0.26	0
Dzank1	0.19	0.08	0.05	0	0.11	0	0	0	0	0	0	0	0	0	0	0	0
Tenm3	0	0.18	0	0	0	0.22	0.2	0	0	0	0	0	0.12	0	0	0.16	0.18
Kif19a	0.04	0.03	0	0	0	0.08	0	0	0.7	0.52	0	0	0	0	0	0.08	0
Lrch1	0.02	0	0	0.17	0	0.15	0	0	0	0.1	0	0	0	0	0	0.03	0
Lrfn2	0	0	0	0	0	0	0.17	0	0	0	0.32	0	0	0	0	0.12	0
Ak8	0	0.05	0.03	0	0	0.03	0	0	0	0	0	0	0	0	0	0	0
Gja8	0	0	0.95	0	0	0.16	0.21	0.27	0	0	0	0.01	0	0	0	0	0
Xxylt1	0.03	0	0	0.08	0	0	0	0.16	0	0	0	0	0	0	0.01	0	0
Mctp2	0	0	0	0	0	0	0	0.23	0.27	0.31	0	0	0.93	0.53	0	0	0
Wfdc1	0.31	0	0	0.95	0	0	0.48	0.07	0	0.05	0	0	0	0	0	0	0
Gtf2f2	0	0.09	0	0	0	0.12	0	0	0.02	0	0	0	0	0	0	0	0
Pknox1	0.01	0	0	0	0	0	0	0	0	0	0	0	0	0	0	0	0.05
Best1	0.66	0.17	0	0.03	0	0	0	0	0	0	0	0.17	0	0	0.25	0	0.78
Ptbp3	0	0	0	0	0	0	0	0	0.22	0.07	0	0	0	0	0	0	0
Uba5	0.01	0	0	0	0	0	0.17	0	0	0	0	0	0	0	0	0.12	0
Gsto2	0	0	0	0	0	0	0	0	0.2	0	0.78	0	0	0	0	0	0
Vgll4	0	0	0	0	0	0	0	0	0	0	0.15	0.14	0	0.11	0	0	0
St6gal2	0	0.4	0.18	0	0	0	0	0	0	0	0.82	0.4	0	0	0	0	0
Nudc	0.04	0.04	0	0	0	0	0	0	0	0	0	0	0	0	0	0	0
Ablim1	0.02	0.07	0.01	0.17	0	0	0	0	0	0	0	0.19	0	0.12	0	0	0
Cpne4	0	0	0	0	0	0	0	0.46	0.87	0.82	0	0	0	0	0.13	0	0
Lrtm1	0.05	0	0	0	0.62	0	0	0	0	0	0.29	0.31	0.9	0.48	0.61	0	0
Tubb2b	0	0	0	0	0	0	0	0	0	0	0.04	0.12	0.07	0.03	0	0	0.07
Sec23ip	0.15	0.02	0	0	0	0	0	0	0	0	0	0	0	0	0	0	0
Tecpr1	0.06	0.13	0.03	0	0	0	0	0	0	0	0	0	0	0	0.09	0	0
Lmo4	0	0	0	0	0	0.16	0.32	0	0.01	0	0.07	0	0	0	0	0	0
Bend6	0.09	0	0.11	0	0	0	0	0	0	0	0	0	0	0	0	0	0
Slc7a3	0.17	0	0	0.73	0.64	0	0.12	0	0	0.08	0	0	0	0.05	0	0	0
Isoc1	0	0	0	0	0.13	0	0.04	0	0	0	0.66	0	0	0	0.17	0.21	0
Cd52	0.55	0	0	0	0	0	0	0	0.39	0	0	0	0	0	0.99	0	0
Fam114a1	0	0	0	0	0	0.68	0	0.01	0.23	0.9	0.82	0.16	0	0	0.12	0.12	0
Atp2b2	0.21	0	0	0.17	0	0	0	0	0	0	0.07	0	0.1	0.15	0	0	0
Vangl1	0	0	0	0	0.13	0	0	0	0.08	0	0.08	0.3	0.08	0	0.08	0	0
Fam49b	0.06	0	0	0.16	0	0	0	0	0	0	0.11	0.09	0.13	0.09	0	0.08	0
Spag16	0	0	0	0	0	0	0	0	0	0	0.11	0.16	0	0.03	0	0	0
Zhx2	0	0	0	0	0	0	0	0	0	0	0.12	0.19	0.05	0	0	0.14	0.24
Atf7ip	0.06	0	0.12	0	0	0	0	0	0	0	0	0	0	0	0	0	0
Flrt2	0.28	0.37	0.11	0.16	0	0.71	0	0	0	0	0	0	0	0	0	0.34	0
Spaca1	0.22	0.23	0.15	0	0	0.93	0	0	0	0	0	0	0	0	0	0	0
Smad1	0	0	0	0	0	0	0	0	0.58	0	0	0	0	0	0	0	0
Slc2a6	0.11	0.05	0	0	0	0	0	0	0	0	0	0	0	0	0	0	0
Ppp4r1	0	0	0	0	0	0	0	0	0	0	0	0.01	0	0	0.05	0	0
Chka	0.12	0	0	0	0	0.09	0	0	0	0	0	0	0	0	0	0.1	0
Rhpn2	0.02	0	0.01	0	0	0	0	0	0.36	0.11	0	0.07	0	0	0	0	0
Clmp	0.19	0	0	0	0.09	0	0	0.18	0.4	0.7	0.37	0	0	0	0	0	0
Glrb	0	0	0.1	0.09	0	0	0	0	0	0	0	0.06	0	0	0	0	0
Mbp	0.07	0.12	0	0	0	0	0	0	0	0	0	0.1	0	0	0	0	0
Cwh43	0	0.28	0.76	0.32	0	0	0	0	0	0	0	0	0	0	0	0	0.91
Sntg1	0	0	0	0	0	0.21	0	0.16	0.05	0.1	0.08	0.24	0	0	0.19	0.15	0
Frmpd3	0	0	0	0.09	0	0	0	0	0.47	0.32	0	0	0	0	0	0	0
Atp1a1	0	0	0	0	0	0	0	0	0	0	0	0	0.39	0.58	0	0	0
Ociad2	0.17	0.38	0.14	0	0	0	0.02	0	0	0	0	0	0	0	0	0.29	0
Zdbf2	0	0	0	0	0	0	0	0	0	0	0.01	0	0	0	0	0.5	0
Plekha5	0	0.22	0.2	0	0.12	0.22	0.14	0	0	0	0	0.06	0	0.21	0	0.07	0
Rabgap1	0.07	0	0.14	0	0	0.01	0	0	0	0	0	0	0	0	0	0	0
Prkca	0	0	0	0	0	0	0.08	0.23	0.32	0.18	0.19	0	0.17	0	0	0.23	0
Nr3c2	0	0	0	0	0	0	0	0	0.13	0.23	0	0	0.23	0.21	0.16	0	0
Bves	0	0	0.18	0	0	0	0	0	0.59	0.73	0	0	0	0	0.54	0	0
Tcf7l1	0	0	0.23	0	0	0	0	0.03	0.67	0.96	0	0	0	0.7	0	0	0
Plekhh2	0	0	0	0	0	0	0	0	0	0	0	0.58	0.97	0.79	0	0.28	0
Hs3st3b1	0	0	0.97	0.12	0	0.16	0.24	0	0	0.11	0	0	0	0	0.57	0.1	0
Smarcd1	0	0.15	0	0	0.04	0	0.06	0	0	0	0	0	0	0	0	0	0
Dscaml1	0	0.8	0.46	0	0	0.56	0	0	0	0	0	0.71	0.36	0.05	0.46	0	0
Eepd1	0	0	0	0	0	0	0	0	0	0	0.12	0.46	0.16	0	0.01	0.26	0
Mctp1	0.3	0	0	0.64	0	0	0	0	0	0	0	0	0	0	0.1	0	0
Exoc3l	0	0	0.06	0	0	0	0	0	0	0	0	0.94	0.86	0	0.3	0.18	0
Xrcc4	0	0	0.03	0.15	0	0	0	0	0	0	0	0.55	0	0	0	0	0
Arhgef11	0.04	0	0	0	0	0	0	0	0	0	0	0.08	0.08	0	0	0	0
Rasl11b	0	0	0	0	0	0	0.06	0	0.07	0.41	0.69	0	0	0	0.4	0	0.47
Kit	0.97	0	0	0	0	0	0	0	0	0	0.86	0	0.07	0	0	0.5	0
Akap9	0.17	0.2	0	0	0	0	0.11	0	0	0	0	0.11	0.13	0	0	0	0
Penk	0	0.04	0	0	0	0.11	0	0	0	0	0	0	0.12	0	0.39	0.85	0
Gad2	0	0	0	0	0.22	0	0	0	0	0	0	0	0.15	0.66	0	0.91	0
Dgkd	0	0	0	0	0	0	0	0	0	0	0.4	0.36	0	0	0	0	0
Nlgn1	0	0.21	0	0.2	0	0.23	0.25	0.12	0.24	0.21	0.22	0.13	0.23	0.19	0	0.23	0
Fabp5	0	0	0.81	0	0	0	0	0	0	0	0	0	0	0	0	0	0
Rsf1	0	0	0.15	0	0	0	0	0	0	0	0.1	0	0	0	0	0	0.07
Necab2	0	0	0	0	0.04	0	0	0.55	0.29	0.25	0	0	0	0	0	0	0
Pus7l	0.08	0	0	0	0	0	0	0	0	0	0	0.01	0.03	0.07	0	0	0
Sstr3	0	0	0	0	0	0	0.13	0	0.59	0.43	0.52	0	0.14	0	0	0	0
Pld3	0.14	0.2	0.02	0.16	0	0	0.16	0	0	0	0	0.03	0	0	0	0	0
Scap	0	0	0	0	0	0	0	0.09	0	0	0	0	0	0	0	0	0
Tuba1a	0	0	0	0	0	0	0.1	0	0	0	0.03	0.09	0.16	0.12	0	0	0.05
S100a6	0	0	0	0	0	0	0	0.27	0.74	0	0	0.2	0.21	0.35	0	0	0
Agl	0	0	0	0	0	0	0	0	0.29	0.08	0	0	0.01	0	0	0	0
Tshz1	0	0	0.12	0.71	0.31	0	0.39	0	0	0	0.12	0	0	0	0	0	0
Olfm2	0.43	0.37	0.18	0.05	0	0.11	0	0	0	0	0	0	0	0	0.07	0	0
Acvr1	0	0	0	0	0	0	0	0	0.49	0.44	0	0	0	0	0	0	0
Gstt1	0.53	0.15	0	0.61	0	0	0.1	0	0	0	0	0	0	0	0.02	0	0.3
Scn2a	0	0.1	0	0.16	0	0.13	0.14	0	0.12	0.17	0.03	0	0	0	0	0.14	0
Tyk2	0	0.11	0.22	0	0	0	0	0	0	0	0	0	0	0	0	0	0
Spast	0	0	0	0.03	0	0	0	0	0	0	0	0.1	0	0	0	0	0
Leprot	0	0	0	0	0	0	0	0	0.62	0.46	0	0	0	0	0	0	0
Fam92b	0	0	0	0	0	0	0	0	0.59	0.09	0	0	0.11	0	0	0	0
Fbxl7	0	0	0	0	0	0.54	0	0.16	0.73	0.32	0	0.73	0.35	0	0	0	0
Bmp2	0.59	0	0	0	0	0.18	0.19	0	0	0	0.7	0	0	0	0	0.53	0
Pcnx	0	0	0	0	0	0	0	0.09	0	0	0.04	0.11	0.1	0	0	0.11	0
Ascc3	0	0	0.09	0	0	0.01	0	0	0	0	0	0	0.04	0	0	0	0
Pitrm1	0.16	0	0	0.02	0	0	0.06	0	0	0	0	0	0	0	0	0	0.08
Ing2	0	0	0	0	0	0	0.19	0	0	0	0	0.33	0	0	0	0	0
Adamts18	0.57	0.58	0.78	0.58	0	0	0	0	0	0	0	0	0	0	0	0.52	0
Calcrl	0	0	0	0	0.12	0	0	0.01	0.22	0.6	0	0	0.7	0	0.57	0.19	0
Rnf152	0	0	0	0.23	0	0	0	0	0	0	0	0	0.74	0.02	0.73	0	0
Ppm1e	0	0	0	0	0	0.11	0	0.08	0.1	0.16	0	0.07	0	0	0.04	0.07	0
Fos	0	0.57	0	0	0	0	0	0	0	0	0.46	0	0.17	0	0.12	0.82	0
Slc22a17	0	0	0	0	0	0	0.03	0	0	0	0	0	0.17	0.16	0	0	0.07
Arhgap31	0	0	0.17	0	0	0	0	0	0	0	0	0.99	0	0	0	0	0
Slc1a2	0	0	0	0	0	0	0	0	0.06	0	0.41	0.14	0	0	0	0	0
Ptprz1	0	0	0	0.16	0	0.05	0	0.13	0.05	0.41	0.01	0	0	0	0.21	0	0
Cacna2d3	0	0	0	0	0	0	0	0	0.04	0.08	0.46	0.6	0.78	0.48	0.27	0	0
Rgma	0	0	0	0	0	0	0	0.59	0.47	0.36	0.55	0	0.8	0	0	0	0
Drd3	0.08	0.32	0	0.88	0	0	0.81	0	0	0	0	0	0	0	0	0.42	0.21
Mob3b	0	0.16	0.58	0	0.08	0.23	0	0	0	0.07	0	0	0	0	0	0	0
Lmtk2	0.13	0.02	0	0.13	0	0.11	0.04	0	0	0	0	0	0	0	0	0	0
Ripor2	0	0.24	0.41	0	0	0	0	0	0	0	0.33	0.32	0	0.34	0	0.07	0
Ranbp9	0	0	0.02	0.11	0	0.05	0	0	0	0	0	0	0	0	0	0	0
Tll2	0	0	0	0	0	0.26	0	0.05	0.77	0.78	0	0	0	0	0	0	0
Scyl2	0	0.02	0.05	0	0	0	0	0	0	0	0	0	0	0	0	0	0
Tpst2	0	0	0	0	0	0	0	0	0.46	0.11	0	0.51	0	0	0	0	0
Ccdc60	0.54	0.15	0.73	0	0	0.3	0	0	0	0	0	0	0	0	0	0	0
Fam78b	0.35	0	0	0	0	0	0	0	0.14	0	0	0	0	0	0	0	0
Ddx60	0	0	0	0.04	0	0	0	0	0	0	0.9	0.27	0.03	0	0	0.47	0
Rapgef5	0	0	0	0	0	0.2	0	0	0	0.06	0.16	0	0	0	0.05	0.23	0
Fxyd7	0.02	0.02	0.11	0	0	0.01	0	0	0	0	0	0	0	0	0	0	0.06
Myo16	0.38	0	0.04	0.22	0	0	0.04	0	0	0	0	0	0	0	0	0	0
Clip4	0	0	0	0.09	0	0	0	0	0	0	0	0	0	0	0	0	0
Cartpt	0	0.36	0	0	0.28	0	0	0	0	0	0	0.96	0	0	0	0	0
Ankmy1	0	0.09	0.24	0	0	0	0	0	0	0	0	0	0	0	0	0	0
Wwox	0.13	0.14	0.17	0	0	0.07	0	0	0.03	0.04	0	0	0	0	0	0	0
Id4	0.48	0.18	0.24	0.02	0.11	0	0.02	0	0	0	0	0	0	0	0	0	0.03
Large1	0.04	0.25	0.27	0	0	0.22	0	0.15	0.19	0.21	0	0	0	0	0	0	0
Trim58	0.83	0	0.12	0.3	0	0	0	0.42	0.34	0	0	0	0	0	0	0	0
Tln2	0	0	0	0	0	0	0	0.2	0.17	0.31	0	0	0.05	0	0.17	0	0
Cfap61	0.27	0	0.18	0.05	0	0	0	0	0	0	0.02	0	0	0	0.11	0	0
Sox21	0	0	0	0	0	0	0.23	0	0	0	0	0	0.94	0.98	0	0	0
Atp11a	0	0.04	0	0	0	0.04	0	0	0	0	0	0	0	0.09	0	0	0
Tlk1	0	0	0	0	0	0	0	0	0	0	0	0	0	0	0	0	0
Eml6	0	0	0	0	0	0	0	0.22	0.38	0.22	0.18	0	0	0	0.21	0.2	0
Msh3	0	0	0	0	0	0.09	0	0	0	0.1	0	0	0	0	0	0	0
Ccdc65	0	0.06	0	0	0	0	0	0	0.39	0	0	0	0	0	0	0	0
Brca1	0	0	0	0	0.57	0.06	0.08	0	0	0	0	0	0.04	0	0	0.14	0
Fggy	0	0	0.1	0	0	0	0	0	0	0	0	0	0	0	0	0	0
Bean1	0.03	0	0	0.25	0	0	0	0	0.04	0.46	0	0	0	0	0	0	0
Slc1a3	0.43	0	0.96	0	0	0	0	0	0	0	0.71	0.23	0	0	0	0	0
Tnfsf11	0.92	0	0	0.91	0	0	0.48	0	0	0	0	0	0	0	0	0	0
Top2a	0.36	0.57	0.03	0	0.42	0	0	0	0	0	0	0	0	0	0	0	0
Batf2	0	0.56	0.49	0	0	0.54	0	0	0	0	0	0	0	0	0	0	0
Cers6	0.11	0	0.19	0	0	0	0	0	0	0	0.1	0	0.18	0	0	0.11	0
Dgkz	0	0	0	0	0	0	0.07	0	0	0	0	0	0	0	0.15	0	0
Ephb6	0.21	0.09	0	0.21	0	0	0	0	0	0	0.31	0	0	0	0	0	0
Snap25	0	0	0	0.18	0	0	0.07	0	0	0	0.14	0.09	0.27	0.24	0	0.05	0
Papss2	0	0	0	0	0	0.1	0.06	0	0.35	0.07	0	0	0	0	0	0	0
Slc36a1	0.11	0.14	0.23	0	0	0	0	0	0	0	0	0	0	0	0	0	0
Pigx	0	0	0.1	0	0	0	0	0	0	0	0	0	0	0	0	0	0
Zfp827	0	0	0	0.17	0	0	0.03	0.06	0.02	0.12	0	0	0	0.08	0	0	0
Ubr3	0	0.14	0	0.05	0	0.07	0.15	0	0	0	0	0	0	0	0	0.14	0
Glg1	0	0.13	0	0.11	0	0	0	0	0	0	0	0	0	0	0	0	0
Rab37	0.91	0.09	0	0.1	0	0	0.13	0	0	0	0	0.48	0	0	0	0.04	0
Prss45	0.17	0.11	0	0	0	0	0	0	0	0	0	0	0	0	0	0.04	0
Hmox1	0.4	0	0	0	0	0	0	0	0	0.08	0.31	0.89	0.01	0.16	0	0	0
Srsf7	0.1	0.11	0.05	0	0	0	0	0	0	0	0	0	0	0	0	0	0
Tenm2	0	0	0	0	0	0.2	0.12	0.23	0.53	0.25	0.24	0	0	0	0	0.23	0.14
Cd276	0	0	0.22	0	0	0	0	0	0	0	0	0	0	0	0	0	0
Cdh4	0.23	0.23	0.36	0	0	0.19	0	0.19	0.49	0.23	0	0	0	0	0	0	0
4930402H24Rik	0	0.03	0	0.18	0	0.17	0.12	0	0.06	0	0	0	0	0.06	0	0.1	0
Npr3	0	0.06	0.13	0.2	0	0.93	0	0	0	0	0	0	0.39	0	0	0	0
Hmox2	0	0	0	0	0	0.05	0	0	0	0	0	0	0	0	0	0	0.23
Cdh2	0	0	0	0.23	0	0	0.06	0	0	0	0	0	0.09	0.21	0	0	0
Nhsl1	0.33	0.16	0.78	0	0.05	0	0.16	0	0	0	0	0	0	0	0	0	0
Sptb	0	0	0	0.03	0	0.12	0.11	0	0	0	0	0	0	0	0	0	0
a	0.18	0	0	0.88	0	0	0	0	0.03	0	0	0	0	0	0	0.41	0
Zfyve28	0	0	0	0	0	0	0	0	0.52	0.11	0	0	0	0	0	0	0
Cyp2c70	0.21	0.28	0.02	0	0	0	0	0	0	0	0	0	0	0	0	0	0
Pde3b	0.09	0	0	0	0	0	0	0	0	0	0	0	0	0	0.03	0	0
Sel1l3	0.22	0	0	0	0	0	0.08	0	0	0	0.91	0	0	0	0	0	0.42
Igsf21	0	0	0	0	0	0.3	0.35	0	0	0.68	0.74	0	0	0	0	0	0.1
Cdk5r1	0	0	0	0	0.01	0	0	0	0	0	0	0	0	0.01	0	0	0
Kctd16	0	0	0	0.22	0	0	0.15	0	0	0	0.47	0.04	0.12	0.02	0.28	0	0
Crb1	0	0	0	0	0	0	0	0	0	0	0	0.89	0	0	0	0	0.45
Dusp22	0.04	0.1	0	0.05	0	0	0	0	0	0	0	0	0	0	0	0.01	0
Pdgfc	0	0	0.43	0.73	0	0	0	0	0	0	0	0.23	0.72	0	0	0	0
Kcnj6	0.1	0	0	0	0	0.06	0	0	0.02	0.18	0	0	0	0.07	0	0	0
Gdap1l1	0	0	0	0	0	0	0.05	0	0	0	0	0	0	0	0	0	0
Alk	0.6	0	0.51	0.66	0	0	0.46	0	0	0	0.69	0	0	0	0	0	0
Ccbe1	0	0	0	0	0	0	0	0	0.89	0.33	0.71	0.23	0	0	0	0	0
Zfp467	0.28	0.71	0.66	0	0	0.58	0	0	0	0	0	0	0	0	0	0	0
Usp12	0	0.05	0.14	0	0	0	0	0	0	0	0	0	0	0	0	0	0
Pitpna	0.02	0.28	0	0	0	0	0	0	0	0	0	0	0	0	0	0.04	0
Spats2l	0.17	0	0.2	0	0	0	0	0	0	0	0.15	0.27	0	0.17	0.05	0	0
Mamld1	0	0	0	0	0	0.15	0	0.2	0.68	0.26	0	0	0.22	0.02	0	0.13	0
Prr29	0	0	0	0	0	0	0	0	0.64	0	0.05	0	0	0	0	0	0
Lrrc1	0	0.67	0.16	0	0	0	0	0	0	0	0.07	0	0	0	0	0	0
Rras2	0	0	0.17	0	0	0	0	0	0	0	0	0	0	0	0	0	0
Tmem233	0.47	0.19	0.91	0	0	0.11	0	0	0	0	0	0	0	0	0	0	0
Creb3l2	0	0.61	0.05	0	0	0.35	0	0	0	0	0	0	0	0	0	0	0
Rbp7	0	0	0	0	0	0	0	0	0.1	0	0	0	0	0	0	0	0
Borcs5	0.06	0	0	0	0	0	0	0	0	0	0	0	0	0	0	0	0
Gadl1	0	0	0	0	0	0	0	0.04	0.7	0	0	0	0.27	0.91	0	0	0
Fam83b	0	0	0	0	0	0.43	0	0	0.64	0.33	0	0	0	0	0	0.35	0
Ano3	0.18	0	0	0	0	0.15	0.15	0.17	0.08	0.28	0	0	0	0	0.44	0	0.03
Gabrg2	0.01	0	0	0	0	0	0	0	0	0	0	0.15	0	0.04	0	0	0
Hmbox1	0	0	0	0	0	0	0	0	0	0	0.05	0.12	0.04	0.08	0	0	0
Pdgfrl	0.9	0.51	0.96	0	0	0.1	0	0	0	0	0	0	0	0	0	0	0
Trim13	0.04	0	0	0	0	0	0	0	0	0	0	0	0	0	0	0	0
Kcnc2	0	0	0	0	0	0	0	0	0	0	0.17	0.26	0.23	0.22	0.04	0.07	0
Mylip	0.2	0.6	0.75	0	0	0	0	0	0	0	0	0	0	0	0	0	0
Plxnd1	0.74	0.53	0	0.4	0	0	0.08	0	0	0.1	0	0.34	0	0	0	0	0
Sytl2	0.11	0	0.59	0.54	0	0	0	0	0	0.19	0.03	0	0	0	0	0	0
Sik3	0.01	0.08	0	0.1	0	0.18	0.08	0	0.03	0.02	0.2	0	0	0	0	0.22	0
Rab31	0	0	0	0	0	0	0	0	0.21	0	0.52	0.17	0	0	0.17	0.13	0
Wnt7b	0.2	0.66	0.25	0	0	0.01	0	0	0	0	0.08	0.27	0	0	0	0	0
Sh2d5	0	0	0	0	0.12	0	0	0	0.3	0.47	0	0	0	0	0	0	0
Sphkap	0	0.13	0.83	0.72	0	0	0	0	0	0	0	0.02	0	0	0	0	0
Qpct	0	0	0	0.01	0	0	0.61	0	0	0	0	0	0	0	0	0	0.15
Tm6sf1	0.19	0.19	0.28	0	0	0	0	0	0	0	0	0	0	0	0	0	0
Cdh8	0.26	0.55	0	0.21	0	0.02	0	0	0	0	0	0	0.38	0.19	0.22	0	0
Vegfb	0	0	0	0.14	0.06	0	0.05	0	0	0.03	0	0	0	0	0	0	0
Acvr1c	0	0	0	0	0	0	0	0.6	0.97	0.95	0	0	0	0	0	0	0
Cytl1	0.55	0.69	0.77	0.13	0	0	0.41	0	0	0	0	0	0	0	0	0	0
F11r	0.37	0.33	0.42	0	0.04	0	0.16	0	0	0	0	0	0	0	0	0	0.11
Cldn11	0	0.52	0.23	0	0	0.18	0	0	0	0	0	0	0	0	0	0	0
Sema3c	0	0	0	0	0	0.18	0	0	0	0.05	0.16	0	0.86	0	0.89	0.18	0
Lhfpl1	0.34	0	0	0	0	0	0.65	0	0	0	0	0	0	0	0	0.21	0.88
Megf10	0	0	0	0	0	0	0	0.23	0.27	0	0.55	0.91	0.33	0.39	0	0	0
Cdh9	0	0	0	0	0	0	0	0	0.16	0	0.66	0.54	0.88	0.6	0.46	0.23	0
Kat2b	0	0	0	0	0	0	0	0	0.16	0	0.07	0	0.25	0.24	0	0.1	0.42
Osbpl3	0	0	0	0.85	0	0	0.85	0	0	0	0	0	0	0	0	0.76	0.84
Slc25a29	0.37	0.42	0.6	0	0	0	0	0	0	0	0.08	0.49	0	0	0	0	0
Lars2	0	0	0	0	0	0	0	0	0	0.01	0	0	0	0	0	0	0
Qprt	0.54	0.73	0.52	0.18	0	0.18	0.23	0	0	0	0	0.07	0	0	0	0	0
Kalrn	0	0.23	0.13	0.01	0	0.24	0.21	0.02	0.21	0.23	0	0	0	0	0	0.12	0
Vrk2	0.1	0.16	0	0	0.02	0.26	0	0	0	0	0	0	0	0	0	0	0
Ppp4r4	0	0	0	0	0.01	0	0	0.15	0.34	0.2	0	0	0.12	0	0	0	0
Psma1	0.21	0	0.03	0	0	0	0	0	0	0	0	0	0	0	0	0	0
Lrriq1	0	0.41	0	0	0	0	0	0	0	0	0	0.54	0.05	0	0	0.02	0
Bmp7	0	0	0	0.2	0	0	0.65	0	0	0	0.97	0	0	0	0	0.13	0.09
Wipi1	0	0.36	0.87	0	0	0	0	0	0	0	0	0	0	0	0	0.02	0
Trpm4	0.51	0.1	0.32	0.4	0.4	0	0	0	0	0	0	0	0	0	0	0	0
Slc9a6	0	0.29	0	0.08	0	0	0	0	0	0	0	0	0	0	0	0	0
Tgfbr3	0.16	0	0	0	0	0	0	0.64	0.75	0.26	0.14	0	0	0	0	0	0
Scn5a	0.12	0.25	0	0	0	0	0	0	0	0	0.8	0	0	0	0	0	0
Spata6	0	0	0	0	0	0	0	0	0.1	0	0	0	0	0	0	0	0
Snx31	0.1	0.83	0	0.64	0	0	0	0	0	0	0	0	0	0	0	0	0
Tspan18	0.31	0	0	0	0.07	0	0.13	0	0	0	0.54	0.34	0	0	0	0	0.02
Scrn1	0	0	0	0	0	0	0	0.05	0.16	0.15	0	0	0	0	0	0	0
Caln1	0.2	0.22	0.21	0.23	0	0	0	0	0	0	0.17	0.1	0	0.21	0	0	0
Jmjd1c	0.04	0.17	0	0	0	0.08	0.16	0	0.08	0	0.14	0.2	0	0	0	0.14	0
Ksr2	0.12	0.21	0.08	0	0	0.22	0.11	0	0.04	0	0	0	0.1	0.08	0	0	0
Ank2	0	0.23	0.03	0.1	0	0.2	0.23	0	0.22	0.14	0	0	0.09	0.12	0	0.14	0
Mov10	0	0	0	0	0	0	0	0	0	0	0	0	0.51	0	0	0	0
Jph4	0	0	0	0	0	0	0	0	0	0.01	0	0	0	0.03	0	0	0
Nrm	0	0	0	0	0	0	0.32	0.98	0	0	0.46	0	0	0	0	0	0
Pdss2	0.11	0	0.04	0	0	0	0	0	0	0	0	0	0	0	0	0	0
Prss55	0	0	0	0	0	0	0	0	0	0	0.73	0.58	0	0	0.13	0.21	0
Reck	0	0	0	0.14	0	0	0	0	0	0	0	0.1	0.12	0	0	0	0
Rarb	0	0	0	0	0	0	0	0.29	0.05	0.19	0	0	0	0.91	0	0	0
Hecw2	0	0	0	0	0	0	0	0	0	0.13	0	0	0	0.15	0	0	0.04
Begain	0	0.09	0	0	0	0.03	0	0	0	0	0	0	0	0	0	0	0
Nrsn1	0.12	0.01	0.01	0.13	0	0	0	0	0	0	0.12	0	0	0	0	0.16	0
Uhrf2	0	0	0	0	0	0	0	0	0	0.02	0	0.15	0	0	0	0	0
Ring1	0.04	0.24	0	0.2	0	0	0	0	0	0	0	0	0	0	0	0	0
Agk	0.15	0	0.13	0	0	0	0	0	0	0	0	0	0	0	0	0	0
Mindy4b-ps	0	0	0	0	0	0	0.07	0	0.75	0.38	0	0	0	0	0	0.7	0
Tnnt1	0	0.28	0.19	0.57	0	0.2	0.57	0	0	0	0	0	0	0	0	0	0
Fam172a	0	0.08	0.05	0	0	0.13	0	0	0.01	0.02	0	0	0	0	0	0	0
Atp11b	0	0	0	0	0	0	0	0	0	0.02	0	0	0.04	0	0	0	0
Arhgef26	0.44	0.53	0	0.82	0	0.44	0	0	0	0	0	0	0	0.3	0	0	0
Dlc1	0.21	0.21	0.18	0.16	0	0.06	0	0	0	0	0	0	0	0	0	0	0
Dlgap2	0	0.16	0	0	0	0.23	0.1	0.1	0.21	0.23	0.11	0	0.02	0	0.15	0.21	0
Btbd16	0.99	0.59	0	0	0	0	0	0	0	0	0	0	0	0	0	0	0
Tbc1d25	0	0	0	0	0.03	0	0.05	0	0	0	0	0	0	0	0	0	0
Tspan15	0.03	0	0.98	0	0	0	0	0	0	0	0	0	0	0	0	0	0
Optn	0	0.01	0.05	0	0	0	0	0	0	0	0	0	0	0	0	0	0
Tsc22d1	0.18	0.13	0.08	0	0	0	0.08	0	0.14	0.07	0	0	0	0	0	0	0
Prrt2	0	0	0.05	0	0	0	0	0	0	0	0	0	0	0	0	0	0
Rps6ka3	0	0.39	0	0	0	0	0	0	0	0	0	0	0	0	0	0	0
Sgk3	0	0	0	0	0	0.16	0	0	0	0.01	0	0	0.1	0	0	0	0
Lamp5	0.73	0.06	0.89	0.13	0	0	0	0	0	0	0	0	0	0	0	0	0
Calhm3	0.05	0.11	0.55	0	0	0	0	0	0	0	0	0	0	0	0.23	0	0
Tmem120b	0	0.1	0	0	0	0.15	0	0	0	0	0	0	0	0	0	0	0
Ror2	0	0	0	0	0	0	0	0	0.36	0.42	0	0	0	0	0.99	0	0
Slc4a4	0.12	0.08	0	0	0	0	0	0	0.09	0	0	0.81	0.58	0	0	0	0
Dab1	0	0.14	0	0.21	0	0.08	0.15	0	0	0	0	0.15	0.19	0	0	0	0
Rimbp2	0	0	0	0	0	0.16	0	0	0.15	0.18	0	0	0	0	0	0.02	0
Mindy4	0	0.05	0	0	0	0.06	0	0	0	0	0	0	0	0	0	0	0
Tacr3	0	0.49	0	0.98	0	0	0.59	0	0	0	0	0	0	0	0	0	0
Mtg2	0.11	0	0	0.09	0	0.09	0	0	0	0	0	0	0	0	0	0	0
Prtg	0.11	0	0.71	0.93	0	0	0	0	0.56	0	0	0	0	0	0	0	0
Kcnd3	0	0	0	0	0	0.22	0	0.12	0.39	0.23	0	0	0	0	0	0	0
Grp	0.74	0.6	0.77	0.26	0	0	0	0	0	0	0	0	0	0	0	0.1	0
P4ha2	0	0.25	0	0	0	0	0	0	0	0	0	0	0	0	0	0	0
Cop1	0.04	0	0.11	0	0	0	0	0	0	0	0	0.02	0.02	0	0	0	0
Sgms1	0	0	0	0	0	0	0	0	0	0	0	0	0	0	0	0	0
Sostdc1	0.1	0	0	0	0	0.16	0	0	0	0.27	0.33	0	0	0	0.98	0.13	0
Csmd1	0	0.01	0.2	0.13	0	0	0.17	0	0.17	0.14	0.25	0.23	0.22	0.24	0	0.21	0
Zfp609	0	0.2	0.18	0	0	0	0.02	0	0	0	0	0	0.13	0.16	0	0	0
Ptprn2	0	0.21	0.14	0.18	0	0.19	0.06	0	0.13	0.2	0.17	0.15	0	0.12	0.14	0.12	0
Ahcyl2	0	0.19	0.16	0	0	0.24	0.12	0	0.11	0.17	0	0	0	0	0	0	0.18
Pparg	0.34	0.92	0.31	0	0	0.18	0	0	0	0	0	0.09	0	0	0	0	0
Cyb5a	0.03	0	0	0	0	0.42	0	0	0	0	0	0	0	0.76	0	0	0
Tspyl2	0	0	0	0	0	0	0	0	0	0	0	0.01	0.1	0.12	0	0	0
Pde7b	0	0.51	0.07	0	0	0.15	0	0	0	0.07	0	0	0	0	0	0	0
Snrnp70	0	0	0.01	0.14	0	0	0	0	0	0	0.05	0	0	0	0	0	0
Hps5	0	0.05	0	0	0	0	0	0	0	0	0	0	0	0	0	0	0
Ptprj	0	0.05	0	0	0	0.22	0	0	0.13	0.18	0	0	0	0	0	0	0
Adgrd1	0.71	0	0	0.76	0	0	0.17	0	0	0	0	0.53	0	0.15	0	0	0
Exoc6b	0	0.09	0	0	0	0	0.04	0	0.12	0.15	0.14	0.24	0.04	0	0.13	0.18	0
Ccdc3	0	0	0.41	0	0.4	0.32	0	0	0.1	0	0	0	0	0	0	0	0
Tbx3	0	0	0	0	0	0	0	0	0	0	0	0	0.27	1	0	0.1	0.77
1700113H08Rik	0.27	0	0	0	0	0	0.05	0	0	0	0.1	0	0	0	0	0	0
Tle4	0	0	0	0	0	0	0	0	0.25	0.17	0	0	0.4	0.32	0	0	0
Mroh8	0	0	0	0	0	0	0	0	0.34	0	0.07	0	0	0	0	0	0
Osbpl8	0	0	0	0.12	0	0	0	0	0	0	0	0.18	0	0	0	0	0
Myo15	0.08	0.09	0	0	0	0.36	0	0.56	0.18	0.29	0	0	0	0	0	0	0
Mast2	0	0	0	0.14	0	0	0	0	0	0	0.05	0.12	0	0	0.16	0.16	0
Atrnl1	0	0.15	0	0	0	0	0	0	0	0	0.23	0.23	0.11	0.21	0.15	0.17	0
Ern1	0.43	0.35	0.58	0	0	0.06	0	0	0	0	0	0	0	0	0	0.12	0
Sec14l1	0	0	0	0	0	0	0	0	0	0	0.03	0.38	0	0	0	0	0
Lrrk1	0	0	0	0	0	0	0.13	0	0.56	0.64	0	0	0	0	0.69	0	0
Tia1	0	0	0	0	0	0	0	0	0	0	0	0.06	0.14	0	0	0	0
Prex1	0	0.29	0	0	0	0	0	0	0	0	0.17	0	0	0	0	0.2	0
Eml1	0	0	0	0	0	0	0	0	0.09	0.06	0	0	0	0.03	0	0	0
Zmiz1	0	0	0	0	0.03	0.01	0	0	0	0	0.07	0	0	0	0	0	0
Pctp	0	0	0	0	0	0.09	0	0.09	0	0.13	0	0	0	0	0	0	0
Macf1	0	0.1	0	0.12	0	0	0.16	0	0.22	0.23	0	0	0	0	0	0.13	0
Gpt2	0	0	0	0	0	0	0	0	0	0	0	0	0.25	0.04	0	0	0
Lgmn	0	0.09	0.1	0	0	0	0	0	0	0	0	0	0	0	0	0	0
Cplx1	0.1	0	0	0.64	0.11	0	0.11	0	0	0	0	0.05	0	0	0	0.14	0.14
Cntnap2	0	0	0	0	0	0	0.2	0.18	0.24	0.24	0.17	0.24	0.25	0.24	0	0.24	0.04
Mroh1	0	0	0	0.14	0	0	0	0	0	0	0	0	0	0	0	0	0
Sorcs2	0	0	0	0	0	0	0	0.1	0.85	0.66	0.01	0.35	0.09	0	0.32	0	0
Cntn4	0.19	0.35	0	0	0	0.23	0.23	0	0	0	0	0	0	0	0	0.2	0
Nr5a2	0	0	0	0	0	0	0	0	0	0.11	0	0	0.25	0.24	0.99	0.22	0
Cacna1f	0.13	0.55	0.46	0.27	0	0.12	0	0	0	0	0	0	0	0.58	0	0	0
Nmbr	0	0.75	0	0.58	0	0	0	0	0	0	0	0	0.52	0.24	0	0	0
Amph	0.33	0.17	0.46	0.22	0	0	0	0	0	0	0	0	0	0	0	0	0
Coro6	0.11	0.06	0	0	0	0	0	0	0	0	0	0	0	0	0.09	0	0
Xkr4	0	0.22	0.09	0	0	0	0	0	0	0	0	0	0.19	0	0	0	0
Exog	0	0	0	0	0	0	0	0	0	0	0.1	0	0	0	0	0	0
Arhgap10	0	0	0	0	0	0	0	0	0	0	0	0	0.44	0	0	0.29	0
Hpgd	0	0	0	0	0	0	0	0.22	0.71	0.83	0	0.27	0	0	0	0	0
Mnat1	0	0	0	0	0	0	0	0	0	0	0.05	0	0	0	0	0	0
Trp63	0	0.89	0.19	0	0	0	0	0	0	0	0	0	0	0	0	0	0
Ust	0	0	0	0	0	0.46	0.43	0	0	0.18	0.5	0	0.54	0.36	0.44	0.36	0.06
F10	0	0.1	0	0	0	0	0	0	0.04	0	0	0	0	0	0	0	0
Zfand3	0.03	0.15	0.2	0.04	0	0.18	0.07	0	0.1	0	0	0	0	0	0	0.07	0
Kcnh5	0	0	0	0	0	0	0	0	0	0	0.61	0.87	0	0	0.41	0.05	0
Lepr	0	0	0	0	0	0	0	0.81	0.98	0.86	0	0	0	0	0	0	0
Eva1c	0.57	0.13	0.66	0	0.05	0	0	0	0	0	0	0	0	0	0	0	0
Trpc7	0	0	0	0.21	0.02	0	0.32	0	0	0	0.93	0	0	0	0	0.47	0
Rassf2	0.04	0	0	0	0	0	0	0	0	0	0.94	0	0.01	0	0	0.63	0
Mras	0.06	0.1	0	0	0	0	0	0	0	0	0	0.02	0	0.05	0	0	0
Invs	0	0.02	0.02	0	0	0	0	0	0	0	0	0	0	0	0	0	0
Magi1	0.22	0	0.16	0	0	0	0	0	0.09	0	0.19	0.07	0	0.22	0	0	0
Gabbr1	0	0	0	0.07	0	0	0	0	0	0	0	0	0	0	0	0	0
Kcnk12	0	0.07	0.06	0	0	0	0	0.06	0	0	0	0	0	0	0	0	0
Pla2r1	0.53	0	0	0.69	0.3	0	0.15	0	0	0	0	0	0	0	0	0	0
Oas3	0.56	0.04	0.69	0	0	0	0.02	0	0	0	0	0	0	0	0	0	0
Nr3c1	0	0	0	0	0	0	0	0.1	0.38	0.17	0	0	0	0.13	0	0	0
Reep3	0	0	0	0	0	0.02	0	0.1	0	0	0	0.08	0	0	0	0	0
Chfr	0.12	0	0	0	0	0	0	0	0	0	0	0	0	0	0	0	0
Slc6a5	0	0	0	0	0	0	0.18	0	0	0	0.59	0	0	0	0	0.77	0.9
Deptor	0	0.15	0	0	0	0	0	0	0.07	0	0.07	0.31	0	0	0	0	0
Magi2	0.14	0.16	0	0.07	0	0	0	0	0.22	0.19	0.24	0.21	0.15	0.23	0.24	0	0
Sult1c1	0.04	0	0	0	0	0	0	0.19	0.14	0	0	0	0	0	0	0	0
Wnk2	0	0	0	0	0	0.12	0	0	0.04	0.05	0	0	0	0	0	0	0
Usp3	0	0	0	0	0	0	0	0	0	0	0	0	0	0	0	0.01	0
Cap2	0	0	0	0	0	0.16	0.11	0	0	0	0.06	0	0	0	0	0	0
Traip	0	0.11	0	0	0	0	0	0	0.21	0.48	0	0	0	0.14	0	0	0
Unc80	0	0	0	0	0	0	0	0	0	0.04	0.15	0	0	0	0.07	0.05	0
Gng4	0.23	0.16	0	0.81	0	0	0.16	0	0	0	0	0	0	0	0	0	0
Lrrc4b	0	0	0	0	0	0	0	0	0	0	0	0.04	0.02	0.05	0	0	0
Cdh7	0.08	0	0	0	0	0	0.71	0	0	0	0	0	0	0	0.02	0	0
Tnrc6a	0.17	0.23	0	0.21	0	0.19	0.23	0.1	0.22	0.14	0.16	0	0	0	0.03	0.08	0
Fnip2	0	0	0	0	0	0	0	0	0	0	0	0	0.07	0	0	0.07	0
Cpvl	0	0.15	0	0.02	0	0	0	0	0	0	0	0	0.02	0	0.24	0	0
Dnah3	0	0	0	0	0	0.58	0	0.69	0.9	0.65	0	0	0	0	0	0	0
Camk2g	0.17	0	0	0	0	0.03	0	0	0	0	0	0	0	0	0	0	0
Dnah10	0	0.3	0.12	0	0	0	0	0	0	0	0	0	0	0	0	0	0
Pdia2	0.01	0.11	0	0	0	0	0.02	0	0	0	0	0	0	0	0	0	0
Fgf12	0	0	0	0.19	0	0.17	0	0	0.13	0	0	0	0	0	0.18	0.08	0
Mapre1	0.01	0.4	0.24	0	0	0	0	0	0	0	0	0	0	0	0	0	0
Fmn1	0	0	0	0	0	0	0	0.19	0.39	0.41	0.03	0.05	0.24	0	0.21	0.05	0
Tspyl1	0	0	0	0	0	0	0	0	0	0	0.04	0.05	0.22	0.17	0	0	0
Ankrd27	0	0	0	0	0	0	0.07	0	0	0	0	0	0	0.04	0	0	0
Lrrfip1	0	0	0	0	0	0	0	0	0.1	0.07	0	0	0	0	0	0.08	0
Gck	0	0	0	0	0	0	0.4	0	0.32	0	0	0	0	0	0	0	0
Sash1	0	0	0.02	0	0	0	0.17	0	0	0	0.03	0	0.46	0.1	0.14	0.11	0
Rnd2	0	0	0	0	0	0	0.21	0	0	0	0	0	0.32	0	0	0.11	0
Crebrf	0	0	0.05	0	0	0	0	0	0	0	0	0	0.06	0	0	0	0
Sik2	0	0	0	0	0	0	0	0	0	0	0	0	0	0	0.06	0.12	0
Wtip	0	0.06	0	0.41	0.12	0	0.31	0	0	0.16	0	0	0	0	0.25	0.15	0
Ccdc6	0	0.18	0.09	0	0	0	0	0	0	0	0	0	0	0	0	0	0
Zfp282	0.12	0	0.09	0	0	0.06	0	0	0	0	0	0	0	0	0	0	0
Slc22a3	0	0	0	0	0	0	0	0	0.44	0.03	0.96	0.56	0	0	0	0	0
Fabp3	0	0.02	0.02	0	0	0	0	0	0	0	0	0	0	0	0	0	0
Igf1r	0	0.06	0.04	0	0	0.1	0	0	0	0	0	0	0.03	0	0	0	0
Maoa	0	0	0	0	0	0.36	0	0.41	0.19	0	0	0	0	0	0	0	0
Uchl1	0	0.05	0	0	0	0	0.06	0	0.01	0	0	0	0	0	0	0	0
Lrrtm4	0	0	0	0	0	0	0	0	0	0	0	0.72	0.79	0.48	0.41	0.37	0
Kcnn2	0	0	0	0	0	0	0	0	0.21	0.27	0	0	0	0	0.08	0	0
Micall2	0.16	0.12	0.06	0	0	0.12	0	0	0	0	0	0	0	0	0	0	0
Dach2	0	0.11	0.36	0	0	0.23	0	0	0	0	0	0	0	0	0	0	0
Phactr2	0.26	0.02	0.25	0	0	0	0	0	0	0	0	0	0	0	0	0	0
Ddah2	0	0	0	0	0	0	0	0.3	0	0.3	0	0.27	0.88	0.29	0	0	0.37
Klk7	0.88	0.67	0.25	0	0	0.68	0.47	0	0	0	0	0	0	0	0	0	0
Ankdd1a	0.22	0	0	0	0	0	0	0	0	0.01	0	0	0	0	0	0	0
Ubl3	0	0	0	0	0	0	0	0	0	0	0.21	0.1	0	0	0	0	0
Tfdp2	0	0	0.01	0	0	0	0	0	0	0	0	0.2	0.07	0	0.14	0	0
Prkacb	0	0.18	0	0	0	0	0	0	0	0	0.18	0	0	0	0	0.19	0
Arhgap36	0	0.54	0	0.07	0	0.89	0	0	0.26	0.27	0	0	0	0	0	0	0
Snca	0	0	0	0	0	0.12	0	0.03	0.44	0.16	0	0	0	0	0	0	0
Prdm10	0.05	0.08	0.11	0	0	0	0	0	0	0	0	0	0	0	0	0	0
Crmp1	0	0	0	0	0	0	0	0.12	0	0	0	0	0	0	0	0	0
Slc17a8	0.18	0.19	0	0	0	0	0	0	0	0	0.96	0	0	0	0	0	0
Gpr156	0	0.01	0.77	0.04	0	0	0	0	0	0	0	0.3	0	0	0	0	0
Adam9	0	0	0	0	0	0.16	0	0	0	0.16	0	0	0	0	0	0.1	0
Fam227a	0	0.05	0	0	0	0	0	0	0.01	0	0	0	0.08	0	0	0	0.01
Slco5a1	0.33	0.78	0.86	0	0	0	0	0	0	0	0	0	0	0	0	0	0
Spag17	0	0	0	0	0	0	0.02	0	0.32	0	0.16	0	0.61	0	0	0.32	0
Rhbdl2	0.18	0.08	0.2	0	0	0	0	0	0	0	0	0	0	0	0	0	0
Evl	0.19	0.04	0.12	0.03	0	0	0.01	0	0	0	0	0	0	0	0	0	0
Abcb7	0	0	0	0	0	0	0	0	0	0	0	0.47	0.05	0.04	0	0	0
Dusp6	0.22	0	0.31	0.54	0	0	0.36	0	0	0	0.39	0	0	0	0	0.75	0
F2r	0.11	0.01	0.75	0	0	0	0	0	0	0	0	0.84	0	0.18	0	0	0
Nefl	0	0	0	0	0	0	0	0	0.33	0.03	0	0	0	0	0	0	0
Dennd5b	0	0	0	0	0	0.13	0.04	0	0	0	0.01	0.11	0	0	0	0.16	0
Ctnna3	0	0.21	0	0	0	0	0	0	0	0	0	0	0	0.02	0	0.09	0
Agxt2	0.14	0.44	0.59	0	0	0.89	0.06	0	0	0	0	0	0.33	0.37	0	0	0
Rxrg	0	0	0	0	0	0.59	0	0.83	0.36	0.46	0	0	0	0	0	0	0
Echdc2	0.45	0.47	0.01	0	0	0	0	0	0	0	0	0.68	0	0	0	0	0
Bcam	0.34	0.13	0	0.68	0	0.19	0.1	0	0	0	0	0	0	0	0.02	0.04	0.43
Ivd	0.19	0.42	0.31	0	0	0	0	0	0	0	0	0	0	0	0	0	0
Mcc	0.57	0	0.72	0	0	0.05	0	0	0	0	0.65	0	0	0	0	0	0
Pygb	0.03	0	0	0.07	0	0	0	0	0	0	0	0	0	0	0	0	0
Lmo3	0.05	0	0	0	0	0.32	0	0	0	0	0	0	0.58	0.78	0.02	0.24	0
Coq10a	0.36	0.04	0	0	0	0	0	0	0	0	0	0	0	0	0	0	0
Pstpip2	0	0	0.89	0	0	0	0	0	0.22	0	0	0.32	0	0	0	0	0
Trpc6	0.7	0.95	0.43	0.51	0	0	0.11	0	0	0	0	0	0	0	0	0	0
Mcmdc2	0	0	0	0	0	0	0	0	0	0	0	0	0	0.13	0	0	0
Atxn7l1	0.15	0	0.12	0.22	0	0	0	0	0	0	0	0	0.15	0	0	0	0
Mapkapk2	0.26	0	0.65	0	0	0	0	0	0	0	0	0	0	0	0	0	0
Klhl23	0.17	0.04	0.18	0.01	0	0	0	0	0	0	0	0	0	0	0	0	0
Cdc42ep3	0	0.06	0	0	0	0	0	0.07	0	0	0.01	0	0	0	0	0	0
Mei4	0	0	0	0	0.07	0	0	0	0.09	0.28	0	0.38	0	0	0	0	0
Clasp1	0.08	0.07	0.06	0.21	0	0	0.07	0	0	0	0	0.01	0	0	0	0.1	0
Asl	0.1	0	0.09	0.03	0	0	0	0	0	0	0	0	0	0	0	0	0
AI593442	0.82	0.12	0.66	0.47	0.03	0	0	0	0	0	0	0	0	0	0	0	0
4921539E11Rik	0	0	0.69	0.17	0.74	0	0.62	0	0	0	0	0	0	0	0	0	0
Asns	0.23	0.02	0	0	0	0.03	0	0	0	0	0	0	0	0	0	0	0
Nt5c2	0.01	0	0.04	0	0	0	0	0	0	0	0	0	0	0	0	0	0
Galntl6	0.23	0.33	0.23	0.23	0	0.22	0.03	0	0	0.03	0	0	0	0	0.19	0	0
Rasal2	0.16	0.01	0	0.02	0	0	0	0	0	0	0.06	0	0	0.17	0	0.17	0
Dhx58	0.18	0.19	0.17	0.17	0	0	0.13	0	0	0	0	0	0	0	0	0	0
Cdkl1	0	0.37	0	0	0	0.08	0	0	0.05	0	0	0	0	0	0	0	0
Myo19	0	0.06	0.12	0.14	0	0	0	0	0	0	0	0	0	0	0	0	0
Slc26a11	0.19	0	0	0	0	0	0	0	0	0	0	0	0	0	0	0	0
Srgap1	0	0	0	0	0	0	0	0.02	0	0.07	0	0.45	0.19	0	0	0	0
Cacna1i	0.06	0.05	0	0	0	0.11	0	0	0	0	0	0	0	0	0	0	0
Zdhhc14	0	0	0	0	0	0.11	0	0	0.14	0.09	0	0	0	0	0	0.19	0
Snx27	0	0.01	0	0	0	0.04	0	0	0	0	0	0	0	0	0	0	0
Ell	0	0.11	0.09	0	0	0	0	0	0	0	0	0	0	0	0	0	0
Pkhd1l1	0.1	0	0	0	0	0	0	0	0.51	0	0	0	0	0	0	0	0
Slc16a10	0	0	0.08	0.09	0	0.28	0.13	0	0	0	0	0	0	0	0	0.08	0
Arrb1	0.08	0	0	0.13	0	0	0	0	0	0	0	0	0	0	0	0	0.19
Lipg	0.18	0	0.37	0.42	0.37	0	0.17	0	0.04	0	0.03	0	0	0	0	0.17	0
Peg3	0	0	0	0	0	0	0.09	0	0.17	0.05	0.21	0.05	0.19	0.16	0	0	0
Kcnt1	0	0.14	0	0.09	0	0.1	0.04	0	0	0	0	0	0	0	0	0	0
Pkd1l2	0	0	0	0	0	0	0	0	0	0	0.43	0.88	0.38	0	0.22	0	0
Syt2	0.8	0.31	0	0	0	0.5	0.15	0	0	0	0	0	0	0	0	0	0.1
Stxbp6	0.62	0	0.07	0	0	0	0.43	0	0	0	0	0	0.73	0	0.03	0.11	0.35
Ak5	0	0	0	0	0	0	0	0	0.13	0.11	0	0	0	0	0.2	0.22	0
Kcnt2	0	0	0	0	0.07	0	0	0	0	0	0.38	0.71	0	0.05	0.22	0	0
Ssbp2	0	0	0	0	0	0	0	0	0	0.18	0	0.2	0.2	0.2	0	0	0
Fbxo34	0	0.08	0	0	0	0	0	0	0	0	0	0	0	0	0	0	0
Sdk2	0	0	0.04	0	0	0	0	0	0.64	0.13	0.6	0	0	0	0	0	0
Tmem215	0	0	0	0	0	0.5	0	0.38	0.55	0.91	0	0	0	0	0.16	0	0
Dzip1l	0	0	0	0	0	0	0.09	0	0.19	0.19	0.67	0.46	0	0	0	0	0
Shroom3	0	0	0	0	0	0	0	0	0	0	0.74	0.15	0.63	0.16	0	0.25	0
Ppp1r17	0	0	0	0	0	0	0	0.03	0.65	0.44	0.83	0	0	0	0	0	0.23
Myo9a	0	0	0	0	0	0.09	0	0	0	0	0.11	0.16	0.13	0.02	0	0	0
Tmem104	0.03	0.2	0	0	0	0.26	0	0	0	0	0	0	0	0	0	0	0
Trim44	0	0	0	0.06	0	0	0	0	0	0	0.14	0.13	0	0	0	0	0
Tacc2	0	0	0	0.12	0	0	0	0	0	0	0	0	0	0.02	0	0	0
Cbr3	0.02	0.17	0	0	0	0	0.02	0	0	0	0	0	0	0	0	0	0
Ifnar2	0	0.18	0	0	0	0	0	0	0.03	0	0	0	0	0	0	0	0
App	0.12	0.14	0	0.23	0	0.07	0.19	0	0.18	0.22	0	0	0	0	0	0.09	0
Mark3	0	0.09	0.12	0.03	0	0.06	0	0	0	0	0	0.01	0	0	0	0	0
Dnm1	0.17	0.12	0	0.18	0	0.09	0.16	0	0	0	0	0	0	0	0	0.06	0
Camta2	0	0.03	0	0.03	0	0	0	0	0	0	0	0	0	0	0	0	0.12
Mapk6	0.01	0.01	0	0	0	0	0	0	0	0	0	0	0	0	0	0	0
Ssbp3	0.15	0	0	0	0	0.15	0	0	0	0	0	0	0.08	0.02	0	0	0
Pitpnm3	0	0	0	0.07	0	0	0	0	0	0.07	0	0	0	0	0	0	0
Greb1	0	0.17	0	0	0	0	0	0	0	0	0.02	0.51	0.1	0.24	0	0	0
Eif2ak3	0	0.34	0	0	0	0	0.08	0	0	0	0	0	0	0	0	0	0
Klf13	0	0.01	0	0.02	0	0	0	0	0.08	0.57	0	0	0	0.01	0	0	0
Rftn1	0	0	0	0	0.04	0	0	0	0.08	0	0	0.66	0.63	0.09	0	0	0
Shisa9	0	0	0	0	0	0	0	0.23	0.54	0.26	0	0	0	0.01	0	0	0
Als2	0	0	0	0.07	0	0	0	0	0	0	0	0	0	0	0	0	0
Parp8	0.18	0.08	0.21	0.21	0	0	0	0	0	0	0	0	0	0	0	0	0
Slc9a5	0.32	0.25	0.19	0.05	0	0	0	0	0	0	0	0	0	0	0	0	0
Nme7	0	0	0	0	0	0.19	0	0	0	0	0	0	0	0	0	0	0
Vps53	0.05	0.07	0	0.11	0	0.09	0	0	0	0	0	0	0	0	0	0.03	0
Smc6	0	0.16	0	0	0	0	0	0	0	0.06	0	0	0	0	0	0	0
Lrmda	0.11	0.36	0.37	0	0	0.42	0	0	0	0.09	0	0	0	0	0	0	0
Sh3bp4	0	0	0	0.28	0	0	0.33	0	0	0	0.68	0.58	0	0	0	0	0
Iars	0	0	0	0	0	0	0	0	0	0.12	0	0	0	0	0	0	0
Atp11c	0	0	0	0.82	0.7	0	0	0	0	0	0	0	0.13	0.08	0	0	0
Mbnl2	0	0	0	0	0	0.21	0	0.08	0.3	0.22	0	0.07	0.12	0.08	0	0	0
Slc9a1	0.35	0	0	0	0.14	0.11	0	0	0	0	0	0	0	0	0	0	0
Cacna1g	0.59	0.63	0.2	0.09	0	0.02	0	0	0	0	0	0.19	0	0	0	0	0
Col26a1	0.48	0	0	0.39	0	0	0.17	0	0	0	0	0	0	0	0.16	0.2	0
B3galt5	0.02	0	0	0	0	0.03	0.28	0	0	0	0	0	0	0	0	0	0
Glipr1l2	0.1	0.07	0	0	0	0	0	0	0	0	0	0	0.34	0	0.44	0	0
Cblc	0.05	0	0	0.33	0	0	0	0.19	0	0	0	0	0.11	0	0	0.16	0.95
Ctsc	0.32	0	0	0	0	0.06	0	0	0.22	0	0	0.21	0	0	0	0.11	0
Luzp2	0.21	0	0	0.21	0	0	0	0	0	0	0	0.58	0.77	0	0	0.34	0
Prcp	0	0	0	0	0	0	0	0	0.07	0	0	0	0	0	0	0	0
Glra2	0	0	0	0.26	0	0	0	0	0.29	0.25	0	0	0	0	0	0	0
Pced1b	0	0	0	0	0	0	0	0.2	0.63	0.81	0	0.04	0.03	0.11	0	0	0
Dach1	0	0	0	0	0	0	0	0	0	0	0.75	0.87	0	0	0.07	0.16	0
Slc44a3	0.91	0.18	0.81	0.5	0	0.06	0.07	0	0	0	0	0	0	0	0.04	0	0
Marcksl1	0.14	0	0.45	0	0	0	0	0	0	0	0	0.08	0.41	0.21	0	0	0.55
Prkar2b	0	0.06	0.14	0	0	0	0	0	0	0	0	0	0	0.05	0	0	0
Ppp1r42	0	0	0	0	0.27	0	0	0	0.13	0.12	0.01	0	0	0	0	0	0
Tmtc1	0.18	0	0	0	0	0.19	0	0	0	0	0	0.39	0.64	0.14	0	0.22	0.09
Nos1ap	0	0	0	0	0	0.17	0	0	0	0.06	0.21	0.22	0.13	0	0.1	0.15	0
Stab2	0	0.72	0.18	0	0	0.24	0	0	0	0	0	0	0	0	0	0	0
Hbp1	0	0	0	0	0	0	0	0	0	0	0.01	0.14	0	0.12	0.15	0	0
Slc1a1	0	0	0	0	0	0.09	0	0	0	0	0	0	0	0	0	0	0
Sun3	0	0	0	0.05	0	0	0	0	0	0	0	0	0.17	0.2	0.21	0.51	0.95
Bcr	0	0	0	0	0	0	0	0	0	0	0	0	0	0.1	0	0	0
Ldb2	0	0	0	0	0	0	0	0.24	0.77	0.53	0.31	0.2	0	0.01	0	0	0
Agrn	0.55	0.17	0.18	0.6	0	0	0.35	0	0	0	0	0	0	0	0	0	0.5
Acta2	0	0	0	0	0	0	0	0	0	0	0.5	0.38	0	0	0	0	0
Chst8	0	0	0	0	0	0.03	0	0.2	0.69	0.43	0	0	0	0	0	0	0
Prkcg	0.27	0.27	0.17	0.61	0	0	0.34	0	0	0	0	0	0	0	0	0	0
Cpne8	0	0	0	0.19	0	0.42	0.21	0	0.36	0	0	0	0	0.18	0	0	0
Scube1	0.86	0.5	0.83	0.35	0	0	0	0	0	0	0	0	0	0	0	0	0
Tbc1d30	0.06	0.08	0.26	0	0	0.14	0	0	0	0	0	0	0	0	0	0	0
Nkain3	0.17	0.52	0.47	0.29	0	0	0.79	0	0	0	0	0	0	0	0	0.27	0.21
Rfx7	0	0	0	0.12	0	0	0	0	0	0	0	0	0	0.01	0	0.01	0
Epb41l5	0	0.1	0	0	0	0.06	0	0	0	0	0	0.04	0	0	0	0	0
Ahnak	0	0	0	0	0	0.88	0.51	0	0.45	0	0	0	0	0	0	0	0
Rgmb	0	0	0	0.24	0	0	0.21	0	0	0.04	0.62	0	0	0.19	0	0.23	0
Tmem19	0	0.15	0.02	0	0.62	0	0	0	0	0	0	0	0	0	0	0	0
Cerkl	0	0	0.03	0.15	0	0	0	0	0.05	0	0.64	0.41	0	0	0	0	0.11
Igsf8	0	0	0	0	0	0	0	0	0	0	0.05	0.03	0.02	0.06	0	0	0
Dlk1	0	0.34	0	0.14	0	0.79	0	0	0.28	0	0	0	0	0	0	0.63	0
Cfap69	0	0	0	0	0	0	0	0	0	0	0.17	0	0	0	0	0	0
Scube2	0	0	0	0	0	0	0	0.04	0.43	0.11	0	0	0.01	0	0	0	0
Crispld1	0	0	0	0	0	0	0.73	0	0.43	0.31	0	0	0	0	0.62	0	0
Strn3	0.03	0.08	0.18	0.1	0	0	0	0	0	0	0	0	0	0	0	0	0
Shisa5	0.36	0.25	0.13	0.01	0	0	0	0	0	0	0	0	0	0	0	0	0
Pgbd1	0.01	0.01	0	0	0	0	0	0	0	0	0	0	0	0	0	0	0
Slc50a1	0.35	0.15	0	0	0	0	0	0	0	0	0	0	0	0	0	0	0
Rgn	0.21	0.37	0.19	0	0.88	0	0	0	0	0	0	0	0	0.16	0	0	0
Fermt1	0.21	0	0	0.2	0.4	0	0	0	0	0	0.18	0.32	0.18	0.92	0.17	0	0
Git2	0.13	0	0	0	0	0	0	0	0	0	0	0	0	0	0.09	0	0
Fgfr1op	0	0.02	0	0	0	0.05	0	0	0	0	0	0	0	0	0.04	0.07	0
Ptgs2	0	0	0.45	0	0	0	0	0	0.55	0	0	0	0	0	0	0.92	0
Nf1	0	0	0.18	0	0	0	0	0	0	0	0.09	0.06	0	0	0	0.17	0
Epsti1	0	0.26	0	0	0	0	0.39	0	0	0	0	0	0	0	0	0.16	0
Dock9	0	0.05	0.11	0	0	0.08	0	0	0	0.15	0	0	0	0	0	0	0
Kcnk1	0	0	0	0	0	0	0	0	0.18	0	0.04	0	0	0	0	0.49	0
Pkn2	0	0	0	0	0	0.1	0	0	0	0.12	0	0.16	0.12	0	0.11	0	0
Ccser2	0.07	0	0.08	0	0	0.03	0	0	0	0	0	0	0	0	0	0	0
Ppfia1	0.13	0	0	0	0	0	0	0	0	0	0	0	0.01	0	0	0	0
Zcchc24	0	0	0	0	0	0	0	0.66	0.72	0.54	0	0	0	0	0	0	0
Etv1	0.85	0.11	0.08	0	0	0	0	0	0	0	0	0.63	0	0.11	0	0	0
Map2k4	0	0	0.14	0.18	0	0.07	0.08	0	0	0	0	0	0	0	0	0.14	0
Sema5b	0	0.59	0.04	0	0	0	0	0	0	0	0.99	0	0	0	0	0.55	0
Yes1	0	0	0	0	0	0	0	0	0.06	0	0	0.05	0	0	0.13	0.38	0
Tcerg1l	0	0	0	0	0	0.11	0	0.2	0.4	0.3	0.51	0.14	0	0	0	0	0
Ankrd31	0	0	0	0	0	0.12	0	0	0.09	0	0	0	0	0	0	0	0
Usp25	0	0.01	0.17	0	0	0	0	0	0	0	0	0	0	0	0	0	0
Enox2	0	0	0	0	0	0	0	0.69	0.81	0.91	0	0	0	0	0	0	0
Frem2	0	0	0	0.43	0	0	0.26	0	0	0	0	0.7	0	0	0.75	0.39	0
Spag9	0	0	0	0.13	0	0	0	0	0	0	0	0.13	0.05	0	0	0	0
Flrt3	0.86	0	0	0.42	0	0	0	0	0	0	0	0	0	0	0.14	0	0
Gsdme	0	0	0	0	0	0	0.03	0	0	0	0.07	0	0	0	0	0.19	0.54
Amigo2	0	0	0	0	0	0	0	0	0.19	0.43	0	0.51	0.02	0.57	0	0	0.22
Cnnm1	0	0.02	0	0	0	0	0	0	0	0.05	0	0	0	0	0	0	0
Rabl6	0.03	0	0	0.08	0	0.09	0	0	0	0	0	0	0	0.02	0	0	0
Larp4b	0	0	0	0.07	0	0	0	0	0	0	0	0	0	0	0	0	0
Gabra2	0	0.3	0.31	0.21	0	0	0.09	0	0	0	0	0	0	0	0	0	0
Cpq	0	0	0.11	0	0	0	0	0	0	0	0	0	0	0	0	0	0
Txnip	0	0	0	0	0	0	0	0	0.23	0	0	0.6	0	0	0	0	0
Zfhx2	0	0	0	0	0	0	0	0	0.02	0	0.06	0.08	0	0.13	0	0	0
Phf3	0	0	0.21	0	0	0	0	0	0	0	0	0.09	0	0	0	0	0
Nbeal1	0	0	0.13	0	0	0.21	0	0	0	0	0	0	0	0	0	0	0
Ptpra	0.14	0	0	0.22	0	0.06	0.17	0	0	0	0	0	0	0	0	0	0
Mkx	0.8	0.72	0.91	0	0	0	0	0	0	0	0	0	0	0	0	0	0
Grk3	0.18	0.26	0.69	0	0	0	0	0	0	0	0	0	0	0.16	0	0	0
Rnf165	0	0.07	0.18	0	0	0	0	0	0	0	0	0	0	0	0	0	0.07
Rgs12	0	0	0	0	0	0.14	0.18	0	0	0	0	0	0	0.03	0	0.05	0
Kremen1	0.05	0	0.54	0	0	0	0	0	0	0	0	0	0	0.44	0	0	0
Pik3c3	0	0	0.2	0	0	0	0	0	0	0	0	0	0	0	0	0	0
Nckap5	0	0	0	0	0	0	0	0.23	0.57	0.3	0	0	0	0.1	0	0	0
Kif13b	0	0	0.66	0	0	0	0	0	0	0	0	0	0	0	0	0	0
Cyld	0	0	0	0	0	0	0	0	0.08	0.03	0	0	0	0	0	0	0
Dgkb	0	0	0	0	0	0.1	0	0.14	0.35	0.24	0.23	0.13	0	0.15	0.23	0.24	0.06
Ttc39a	0.5	0.06	0	0	0	0	0	0.1	0	0	0	0	0	0	0	0	0
Dcaf6	0	0	0	0	0	0	0	0	0	0	0	0	0	0.03	0	0	0
Tle2	0.51	0.3	0.05	0.13	0	0.29	0.15	0	0	0	0	0.02	0	0	0	0	0
Sgpl1	0	0.08	0.55	0	0	0	0.04	0.11	0	0	0	0	0	0	0	0	0
Nrgn	0	0	0	0	0	0.28	0.07	0.11	0.65	0.4	0	0	0	0	0	0	0
Dcdc2a	0.49	0	0	0.86	0.09	0	0.32	0	0	0	0.4	0	0	0	0.11	0.04	0
Stk32c	0	0	0	0	0	0	0	0.05	0.01	0.03	0	0	0	0	0	0	0
P4ha3	0.11	0.53	0.15	0.04	0	0	0	0	0	0	0	0	0	0	0	0	0
Glt8d2	0.06	0.12	0.03	0	0.39	0.03	0.08	0	0	0	0	0	0	0	0	0	0
Tcf4	0	0	0	0	0	0	0	0	0	0	0.78	0.83	0	0	0	0.12	0
Gpat3	0.23	0	0	0	0	0	0	0	0.51	0	0	0	0	0	0.24	0	0
Cdh23	0.25	0.23	0	0	0.22	0	0.7	0	0	0	0	0	0	0.12	0	0.47	0
Arhgef28	0.32	0.52	0	0	0	0.07	0	0	0	0	0	0	0	0.09	0	0	0
Tmem241	0	0	0	0	0	0.19	0	0	0	0.12	0	0	0	0	0	0	0
Astn1	0	0	0	0.04	0	0.13	0.12	0.05	0.03	0.17	0	0	0	0	0	0	0
Gpc3	0	0	0	0	0	0	0	0.53	0.88	0.55	0	0	0	0	0	0.64	0
Dgkh	0.3	0	0	0	0	0	0	0	0.12	0	0	0	0.16	0	0	0.01	0
Nr2c1	0	0	0	0	0	0	0	0	0	0	0	0	0	0	0	0	0
Surf4	0	0.08	0	0	0	0	0	0	0	0	0	0	0	0	0	0	0
Stxbp5l	0	0.13	0	0	0	0.22	0	0	0.09	0.19	0.23	0.16	0	0.13	0	0	0
Tanc2	0	0.02	0	0.05	0	0.16	0.19	0	0.23	0.23	0	0	0.12	0	0	0.12	0
Mdga2	0.15	0.22	0.23	0.24	0	0	0.23	0	0.08	0	0.16	0.03	0.14	0	0	0.22	0
Tmod1	0.45	0	0	0	0	0.18	0.35	0	0	0	0	0	0	0	0	0.31	0
C2cd3	0	0.01	0	0	0	0	0	0	0	0	0	0	0	0	0	0	0
Trim17	0	0	0	0	0	0	0	0	0	0	0	0	0.61	0.02	0	0	0
Klhl14	0.95	0	0.25	0.83	0	0	0	0	0	0	0	0	0	0	0	0.31	0
Susd4	0	0.22	0	0	0	0.25	0	0	0.17	0.2	0	0	0	0	0	0	0
Pex5	0	0	0	0	0	0	0.03	0	0	0	0	0	0	0	0.2	0	0
Slc22a23	0	0	0.13	0	0	0	0	0	0	0	0	0	0.01	0.21	0	0	0
Prkcd	0.69	0.67	0.46	0	0	0.31	0.11	0	0	0	0	0	0	0	0.36	0	0
Mlxipl	0.9	0.39	0.52	0	0	0	0	0	0	0	0	0	0	0	0	0	0
Scn10a	0	0.02	0	0	0	0	0	0	0	0.09	0.97	0.14	0	0	0	0	0
Pkp4	0	0	0.19	0	0	0.1	0	0.19	0.17	0.22	0	0	0	0	0	0.05	0
Otud4	0.04	0	0	0	0	0	0	0	0.04	0	0	0	0.02	0	0	0	0
Lrrc8d	0	0	0	0	0	0	0	0	0	0.03	0.08	0.15	0	0	0	0	0
Cxxc4	0	0	0	0.08	0	0	0	0.09	0.24	0.01	0	0	0	0	0	0	0
C1galt1	0	0.1	0.02	0	0	0	0	0	0	0	0	0	0	0	0	0	0
Cygb	0	0.37	0.14	0	0	0	0	0	0	0	0	0.8	0.29	0	0	0	0
Glipr2	0	0	0	0	0.51	0	0	0	0	0	0	0	0.75	0.38	0	0.12	0
Dchs2	0.14	0	0	0	0	0	0	0	0	0	0	0.74	0.76	0.35	0	0	0
Nsun3	0	0.03	0	0	0.55	0	0	0	0	0	0	0	0	0	0	0	0
Asxl3	0.19	0	0.17	0.27	0	0	0	0	0	0	0.01	0	0	0	0	0	0
Cngb1	0	0	0	0	0	0	0	0.31	0.88	0.82	0	0.53	0	0	0	0	0
Thsd7a	0	0	0.04	0.31	0.28	0	0	0	0	0	0	0.28	0.61	0.25	0	0	0
Prss37	0	0.44	0	0	0	0	0.22	0.98	0	0	0	0	0	0	0	0	0
Ppp6r2	0	0	0	0	0	0.17	0	0	0	0	0	0	0	0	0	0	0
Pgm5	0.15	0	0.44	0.92	0.68	0	0	0	0	0.02	0.4	0	0	0	0	0	0
Sfxn4	0.2	0	0	0.14	0	0	0	0	0	0	0	0	0	0	0	0	0
Clstn2	0	0.27	0.11	0	0	0.08	0.08	0	0	0	0	0.1	0	0.06	0	0	0
Stk26	0	0.51	0	0	0	0	0.24	0.09	0.38	0.42	0	0	0	0	0	0	0
Cpne9	0.74	0.1	0	0	0.06	0.83	0	0	0	0	0	0	0	0	0.16	0	0
Trpv3	0	0	0	0	0	0.31	0	0.09	0.44	0.7	0	0.1	0	0	0	0	0
Gtf2i	0	0.05	0	0	0	0	0.07	0	0.12	0.01	0.09	0.18	0	0	0	0	0
Def6	0.02	0.57	0.31	0	0	0	0	0	0	0	0	0	0	0	0	0	0
Fat4	0	0.84	0	0	0	0.59	0	0.04	0	0	0.11	0.05	0	0	0	0	0
Nek5	0	0	0	0	0	0	0	0	0.14	0.35	0	0	0.3	0.43	0	0.07	0
Tram2	0	0	0	0	0	0	0	0	0.03	0	0	0.07	0	0	0	0.09	0
Kdr	0	0	0	0	0	0	0	0.14	0	0	0.54	0.92	0.39	0.5	0	0	0
Phactr3	0	0	0.04	0.03	0	0	0	0	0	0	0	0	0	0.12	0	0	0
Snrpa	0.28	0.11	0.21	0.04	0	0	0	0	0	0	0	0	0	0	0	0	0
Car11	0	0	0	0	0	0.18	0.11	0	0	0	0	0	0	0	0	0	0.06
Ppargc1b	0	0	0	0	0	0	0	0	0	0	0	0	0.05	0	0.04	0	0
Hltf	0.07	0	0	0.02	0	0	0	0	0	0	0	0.06	0	0	0	0	0
Coch	0.03	0.12	0.53	0.04	0	0	0	0	0	0	0	0	0	0	0	0.03	0
Glb1l3	0.93	0	0.91	0.05	0	0	0	0.12	0	0	0	0	0	0	0	0	0
Msmb	0.21	0	0	0.27	0.98	0	0	0	0	0	0	0	0	0.48	0	0	0
Limch1	0	0	0	0	0	0	0	0	0.02	0.2	0.16	0.21	0.16	0.16	0.18	0.03	0
Unc13b	0	0	0.05	0	0	0	0	0	0.01	0	0	0	0	0	0	0	0
Pgr	0.52	0.92	0.78	0.22	0	0	0.07	0	0	0	0	0	0	0	0	0	0
Fam126a	0	0	0	0	0	0.26	0	0.19	0.29	0.83	0	0	0	0	0.17	0	0.03
Kcnab1	0	0	0	0	0	0.07	0	0.22	0.75	0.29	0	0	0	0	0	0	0
Pcgf5	0.03	0	0	0	0	0	0	0	0	0	0	0	0	0	0	0.16	0
Srrm4	0.12	0.17	0.15	0	0	0.2	0	0	0.1	0.17	0	0	0	0	0	0	0
Camk1d	0	0.29	0.05	0	0	0	0	0	0	0	0.04	0	0	0	0	0.16	0.01
Tigar	0	0.18	0.36	0	0	0.01	0	0	0	0	0	0	0	0	0	0.29	0
9330182L06Rik	0	0	0	0	0	0	0	0	0	0	0	0.16	0.22	0.22	0	0	0
Pcdh15	0.23	0	0	0	0	0	0	0	0	0	0.02	0	0	0	0.07	0	0
Pik3ip1	0	0	0	0	0	0	0	0	0	0.17	0	0.2	0.42	0.15	0.1	0	0
Map2k6	0	0	0	0	0	0	0.16	0	0	0	0	0.04	0.65	0.02	0.26	0.01	0
Stk39	0	0	0	0	0	0	0.05	0	0	0	0	0	0	0	0	0.15	0
Capn2	0	0	0	0	0	0	0	0	0.01	0	0	0.01	0	0	0	0	0
Klhl5	0	0	0	0	0	0.07	0	0.09	0.11	0.21	0.08	0.06	0.06	0.14	0.08	0	0.09
Arhgef40	0	0	0	0	0	0	0.17	0	0.26	0	0	0	0	0	0	0	0
Ipo11	0.05	0	0	0	0	0.13	0	0	0	0	0	0	0	0	0	0	0
Ankrd34b	0	0	0	0	0	0.52	0	0.02	0.32	0.55	0	0	0	0.77	0	0.36	0
Gramd2	0	0	0	0	0	0	0	0	0.19	0	0	0	0	0	0	0	0
Atp7a	0	0	0	0	0	0	0.13	0	0	0	0	0.01	0	0	0.13	0.2	0
Scarf2	0	0.04	0.02	0	0	0	0	0	0	0	0	0	0	0	0	0	0
Rcor3	0	0	0	0	0	0	0	0.07	0	0.04	0	0	0	0	0	0	0
Slain1	0	0.03	0	0	0	0	0	0	0	0	0	0	0	0	0	0	0
Pomt2	0	0	0	0	0	0	0	0.02	0.1	0.04	0	0	0	0	0	0	0
Dip2c	0	0.18	0.08	0.11	0	0.12	0	0	0	0	0	0	0	0	0	0	0
Pkp2	0	0	0.52	0	0	0	0	0	0	0	0	0	0	0	0	0.34	0
Nrsn2	0.06	0.1	0	0.27	0	0	0.1	0	0	0	0	0	0	0	0	0	0
Gsg1l	0.55	0.07	0.27	0	0	0	0.09	0	0	0	0	0	0	0	0	0	0
Ppp2r2c	0.03	0	0	0.01	0	0.21	0	0	0	0	0	0	0	0	0	0	0
Mcph1	0.01	0	0	0	0	0.06	0	0.13	0	0.14	0	0	0	0	0	0	0
Necab1	0	0	0	0	0	0	0.24	0	0.27	0	0	0	0.6	0.79	0	0.08	0
Tgfb2	0.05	0	0	0	0	0	0	0	0.13	0	0	0	0.06	0.16	0.84	0	0
Stn1	0.05	0	0	0.18	0.44	0	0.19	0	0	0	0	0	0.2	0.18	0.01	0.28	0
Ralgapa2	0.19	0	0	0	0	0	0	0	0	0.05	0.14	0	0	0	0	0	0
Lhx2	0	0	0	0	0	0	0	0	0.37	0	0.78	0.49	0	0	0.27	0.68	0
Cep85l	0	0	0	0	0	0	0	0	0	0.06	0.16	0.09	0	0	0	0.2	0
Knstrn	0	0.77	0.91	0	0	0.07	0	0	0	0	0	0	0	0	0	0	0
Chd6	0	0	0	0	0	0	0.1	0	0	0	0.13	0	0	0.13	0	0.09	0
Hlf	0	0	0	0	0	0	0.02	0	0	0.21	0.07	0.75	0	0	0	0.04	0
Ywhaz	0	0	0	0	0	0	0	0.15	0	0	0	0	0	0	0	0.05	0
Dennd5a	0	0	0	0	0	0	0	0	0	0	0	0	0.17	0.13	0	0.01	0
Ptpn4	0	0.08	0	0	0	0.06	0	0	0	0	0	0	0	0	0	0	0
C1ql2	0	0	0.29	0	0	0	0.25	0.13	0.17	0	0	0	0.06	0	0	0.11	0
Ret	0	0	0	0	0	0	0	0.65	0.7	0.01	0	0	0	0.09	0	0	0
Ppm1l	0	0	0	0.17	0	0	0	0	0	0	0	0	0	0	0	0.11	0
Pld6	0	0	0	0.14	0	0	0	0.76	0.03	0.03	0	0	0	0	0.96	0	0
Ptprr	0.16	0	0	0	0	0	0	0	0	0.09	0	0	0.06	0.1	0.08	0	0
Sorbs1	0.15	0	0.07	0	0	0	0	0	0	0	0.12	0.15	0	0.11	0	0	0
Smoc1	0	0	0	0	0	0.05	0	0	0	0.8	0.17	0.86	0.78	0	0	0	0
Gucy1b1	0	0	0	0	0	0	0	0	0	0	0	0.2	0	0	0	0	0
Frmd3	0.54	0.27	0.34	0.12	0	0	0	0	0	0	0	0	0	0	0	0	0
Cacna2d1	0	0	0	0	0	0.13	0.18	0.12	0.19	0.22	0.21	0.24	0.2	0	0.24	0.2	0
Rfx4	0	0.06	0.08	0	0	0	0	0	0	0	0	0	0	0	0	0	0
Slc27a6	0.18	0	0.13	0	0	0	0	0	0	0	0.88	0	0	0	0.87	0.57	0.35
Dnah1	0.3	0.1	0	0	0	0	0.1	0	0	0	0.13	0	0	0	0	0	0
Arhgap22	0	0	0	0	0	0.08	0	0	0	0.1	0	0	0	0	0	0	0.11
Tmem178b	0.21	0.23	0.23	0	0	0	0.04	0	0	0.04	0	0.01	0.16	0.1	0.03	0.08	0
Traf3	0	0.06	0.02	0.02	0	0.1	0	0	0	0	0	0	0	0	0	0	0
Ehd3	0.14	0.2	0	0.46	0	0.02	0	0	0	0	0	0	0	0	0	0	0.22
Igf1	0	0	0.44	0	0	0	0	0	0	0	0.87	0	0	0.83	0	0.1	0
Galr1	0.03	0	0	0.06	0	0	0	0	0	0	0.41	0.9	0.19	0	0	0	0
Rap1gap	0	0	0	0	0	0.14	0	0	0	0.16	0	0	0	0.02	0	0	0
Prpf4b	0	0	0	0	0	0.02	0	0	0	0.11	0	0	0	0	0	0.1	0
Tenm4	0.12	0	0	0	0	0.2	0	0	0.11	0.2	0	0	0.21	0	0.24	0	0.04
Shc3	0.04	0	0	0	0	0	0	0	0	0	0.09	0.19	0	0	0.1	0.16	0
Lrmp	0.53	0.2	0.83	0.04	0	0	0	0	0	0	0	0	0	0	0	0	0
Maml2	0	0.05	0	0	0	0.22	0.14	0.15	0.07	0	0	0	0	0	0	0	0
Shtn1	0	0	0	0.13	0	0	0	0	0	0.07	0.18	0.2	0	0	0	0.11	0
Nptx1	0.34	0.68	0.76	0	0	0.9	0	0	0	0	0	0	0	0	0	0	0
Chst9	0	0	0	0.95	0.05	0	0.44	0	0	0	0.32	0	0	0.8	0	0	0
Nr4a1	0	0	0	0.16	0	0	0	0	0.09	0	0.61	0	0	0	0	0.82	0.13
Ankrd55	0.11	0	0	0.18	0	0	0	0	0	0	0	0.01	0	0	0	0.11	0
Alcam	0.32	0.58	0.72	0.2	0.1	0	0	0	0	0	0	0.23	0	0	0	0	0
Snap91	0	0.11	0.03	0.14	0	0.2	0.17	0	0.08	0.07	0	0	0	0	0	0.1	0
Sh3pxd2a	0.14	0	0.01	0	0	0	0	0	0	0	0	0.06	0	0	0.16	0	0
Grm8	0.2	0	0.24	0	0	0	0	0	0	0	0.18	0	0	0	0.09	0	0
Sc5d	0.28	0	0.18	0	0	0	0.05	0	0	0	0	0	0	0	0	0	0
Rerg	0	0	0	0	0	0.18	0	0.03	0.47	0.26	0	0	0	0	0.11	0	0
Ctsh	0.06	0.11	0	0	0	0.19	0	0	0	0	0	0	0	0.88	0	0	0
Rad9a	0	0.15	0	0	0	0	0	0	0	0	0	0	0	0	0	0	0
Kdm4b	0	0	0	0.03	0	0	0	0	0	0	0	0	0	0	0	0	0
Irs2	0	0.04	0	0	0	0	0	0	0.01	0	0	0	0	0	0	0	0
Trabd2b	0	0	0	0	0	0	0	0	0.28	0.35	0	0	0.16	0.31	0.78	0.12	0
Epb41l2	0	0	0	0.2	0	0	0	0	0.12	0.13	0	0	0.04	0	0	0	0
Erlec1	0	0.01	0	0.1	0	0	0	0	0	0	0	0	0	0	0	0	0
Nos1	0.67	0.63	0	0	0	0.14	0	0	0	0	0.15	0	0	0	0	0	0
Atp2b1	0	0.03	0	0	0	0	0	0	0	0	0.07	0	0	0	0	0.15	0
Brf1	0	0	0	0	0	0.25	0	0	0	0	0	0	0	0	0	0	0
Cyp7b1	0	0	0	0	0	0	0	0	0	0	0	0	0	0.17	0	0	0
Bcl2	0	0	0.39	0.35	0	0	0	0	0	0	0.2	0	0.1	0.65	0	0.13	0
Pacs2	0	0	0	0	0	0.37	0	0	0	0.25	0	0	0	0	0	0	0
Inpp4b	0.08	0	0.14	0	0.16	0	0.2	0	0	0	0	0	0.53	0	0	0	0
Palmd	0	0	0	0	0	0	0	0.34	0.74	0.7	0.33	0.56	0	0	0	0	0
Gltp	0	0.11	0	0	0	0	0	0	0	0	0	0	0	0	0	0.07	0.03
Vat1l	0	0.16	0	0	0	0.02	0	0	0	0	0	0	0	0	0	0.21	0
Kcnq3	0	0	0	0	0	0.22	0	0.21	0.24	0.24	0	0	0	0	0	0.12	0
Itpr1	0	0	0	0	0	0.16	0	0	0	0.07	0.37	0	0	0	0.14	0	0
Mllt3	0.03	0	0	0	0	0	0.09	0.18	0	0	0	0	0.1	0.2	0	0	0
Nudt18	0	0.29	0.13	0	0.06	0.08	0	0.02	0	0	0	0	0	0	0	0	0
Rph3a	0.69	0	0	0.13	0	0	0	0	0.06	0	0.53	0	0	0	0	0	0
Osbpl2	0	0	0	0	0	0	0	0	0.05	0	0	0	0	0	0	0	0
Zmym3	0	0	0	0	0.05	0	0	0	0	0.12	0	0	0	0	0	0	0
Pcbp3	0.03	0	0	0	0	0	0	0	0	0	0	0.61	0.26	0	0	0	0
Dcbld1	0	0	0	0	0.29	0.08	0	0	0.11	0.08	0	0	0	0	0	0.15	0.03
Tjp1	0	0	0	0	0	0.23	0	0.19	0.15	0.22	0	0	0.16	0.22	0.02	0	0
Gphn	0	0.19	0	0.19	0	0.14	0.22	0	0.24	0.19	0.2	0.18	0.09	0	0	0.23	0
Csrp2	0	0.1	0	0.13	0	0	0	0	0	0	0	0.19	0.35	0.48	0.09	0	0
Ccdc122	0.07	0	0.08	0.05	0.64	0	0.14	0	0	0	0	0	0	0	0.26	0.18	0
Alox15	0	0.31	0.7	0	0	0	0	0	0	0	0	0	0	0	0	0	0.73
Dock7	0	0	0	0	0	0	0	0	0	0	0	0.19	0.18	0	0	0	0
Ptchd4	0.02	0.02	0.06	0.1	0	0.06	0.09	0	0	0.01	0	0	0.15	0	0	0	0
Cntrl	0.36	0.21	0.05	0	0	0	0	0	0	0	0	0	0	0	0	0	0
Filip1l	0.18	0.24	0.02	0.21	0	0.03	0.23	0	0.21	0	0.21	0.14	0.16	0	0	0.19	0
Trpc4	0	0.84	0	0.06	0	0	0.47	0	0	0	0	0	0	0	0	0.4	0
Osbpl11	0	0.07	0.34	0	0	0	0	0	0	0	0	0	0	0	0	0	0
Dis3l	0	0	0	0	0	0	0	0.05	0.06	0.15	0	0	0	0	0	0	0
Ppp2r5e	0	0	0	0	0	0	0	0.07	0	0.05	0	0.16	0	0	0	0	0
Runx1t1	0	0	0.1	0	0.26	0	0	0	0	0	0	0	0	0.64	0	0	0
Tmtc4	0	0.31	0.23	0	0	0	0.23	0	0	0	0	0	0	0	0	0	0
Acer3	0.15	0	0.07	0.01	0	0	0	0	0	0	0	0	0	0	0	0	0.08
Map4k1	0.46	0.56	0.7	0.48	0	0	0.31	0	0	0	0	0	0	0	0	0	0
Rabep1	0	0.06	0	0.05	0	0.04	0	0	0	0	0	0	0	0	0	0.05	0.09
Trrap	0	0	0	0	0	0	0	0	0	0	0	0	0	0.06	0	0.02	0
Tom1l2	0.04	0.02	0	0.04	0	0.08	0	0	0	0	0	0	0	0	0	0	0
Rbfox1	0.22	0.25	0	0	0	0.25	0.21	0.24	0.25	0.25	0	0	0	0.04	0	0.23	0
Tdg	0	0	0.17	0	0	0	0	0	0	0	0	0	0	0.05	0	0	0
Ptprs	0	0.01	0	0	0	0	0	0	0	0	0.12	0.22	0	0.01	0	0	0
Snx7	0	0	0	0	0	0	0	0	0	0.06	0.47	0.72	0.19	0.11	0	0	0
Limd1	0	0	0	0	0	0	0	0.02	0.52	0.01	0	0	0	0	0	0	0
Eml5	0	0	0	0	0	0	0	0	0	0	0.23	0.11	0.15	0	0	0	0
Tbc1d15	0	0.02	0.08	0	0	0	0	0	0	0	0	0	0	0	0	0	0
Grin2d	0.54	0.1	0.27	0.26	0.01	0	0	0	0	0	0	0.15	0	0	0	0	0
Plag1	0	0	0	0	0	0	0	0	0.55	0.43	0	0	0	0	0	0.13	0
Tdrd5	0.72	0.55	0.63	0.22	0	0.28	0.27	0	0	0	0	0	0	0	0	0.15	0
Chd9	0	0	0	0	0	0.08	0.05	0	0	0	0.18	0.18	0.07	0.13	0	0.11	0
Sardh	0	0	0	0.39	0	0	0	0	0	0	0.11	0	0.64	0.39	0	0.16	0
Kcng3	0	0.68	0.41	0	0.25	0	0	0	0	0	0	0	0	0	0	0	0
Klhl1	0	0.42	0	0	0	0.23	0	0	0	0	0	0	0	0	0	0	0
Cpeb3	0	0	0	0.07	0	0	0	0	0	0	0.05	0.2	0.11	0	0	0	0
Dcx	0	0.01	0	0	0	0	0	0	0	0	0	0	0	0	0	0	0
Ube2cbp	0	0	0	0	0	0	0	0	0	0	0	0	0	0	0.17	0.08	0
Ankar	0	0	0	0	0	0	0	0	0	0	0	0.04	0.01	0	0	0	0
Drp2	0	0.4	0	0	0.02	0	0	0	0	0	0	0	0	0	0	0	0
Lama3	0	0	0	0	0	0	0	0.15	0.64	0.36	0.81	0	0	0	0.29	0	0
Cxadr	0	0	0	0	0	0	0	0	0	0	0	0	0	0	0	0	0
Rapgef6	0	0.06	0	0.17	0	0.02	0.14	0	0	0	0.16	0.22	0.14	0.06	0	0.16	0
Katnal2	0.06	0	0.07	0	0	0	0.04	0	0	0	0	0	0	0	0	0	0
Mcu	0	0	0	0	0	0	0	0.11	0	0.14	0	0	0	0	0	0	0
Plcb4	0.15	0	0	0	0	0	0	0	0.22	0.23	0.18	0.14	0	0	0	0	0
Gabra5	0	0	0	0	0	0.1	0	0.27	0.59	0.39	0	0	0	0	0.07	0	0
Tmem74	0	0	0	0	0	0.13	0.57	0	0.04	0	0	0.16	0.71	0.4	0	0	0
Scml4	0.1	0	0	0	0	0	0.06	0.05	0	0.68	0	0	0.14	0.54	0	0	0
Egr4	0	0	0	0	0	0	0	0	0.45	0.14	0.56	0	0	0	0.31	0.84	0
Emb	0	0	0	0.03	0	0	0	0	0	0	0	0	0.06	0	0	0	0
Nfatc1	0.77	0.45	0.8	0	0	0	0	0	0	0	0	0.13	0	0	0	0	0
Pcdh9	0.22	0	0	0	0	0	0.2	0.19	0.23	0.24	0.17	0.22	0.24	0.2	0.22	0.25	0
Strip2	0	0.39	0.29	0	0	0.33	0	0	0	0	0	0	0	0	0	0	0
Clvs1	0.14	0	0	0.08	0	0	0	0	0	0	0	0.06	0	0	0	0	0.13
Grm5	0.15	0	0	0	0	0.23	0.21	0.22	0.19	0.23	0	0	0.21	0	0	0	0
Tmco3	0	0	0	0.18	0	0	0	0	0	0	0	0	0	0	0	0	0
B4galnt4	0	0.07	0	0	0	0	0	0	0	0	0	0	0	0	0	0	0
Rims1	0	0	0	0.2	0	0	0.21	0	0.1	0.13	0.16	0.04	0.16	0	0	0.1	0
C2cd5	0.16	0.15	0.15	0	0	0	0	0	0	0	0	0	0	0	0	0	0
Adra1a	0	0	0	0	0	0	0	0	0.31	0.08	0.14	0.15	0	0	0	0.36	0.02
Cntnap4	0	0.18	0	0.61	0	0	0.74	0	0	0	0	0	0	0	0	0.21	0.13
Thbs3	0	0.12	0	0	0	0.19	0	0	0	0	0	0	0	0	0	0	0
Prdm8	0	0	0	0	0	0	0	0	0	0	0.86	0.58	0	0	0	0.45	0
Hmgcs1	0	0	0.26	0.11	0	0.2	0.01	0	0	0	0	0	0	0	0	0	0
D10Wsu102e	0	0	0	0	0	0	0	0	0	0	0	0	0	0	0	0	0
Trpc5	0.52	0	0	0	0	0	0.87	0	0	0	0	0.25	0	0	0	0.29	0.26
Osbpl9	0.04	0	0.01	0	0	0	0	0	0	0	0	0	0	0	0	0	0
Pgp	0	0	0	0	0	0.08	0	0	0	0	0	0	0	0	0	0	0.06
Gnai1	0	0	0	0.08	0	0	0.31	0	0	0	0	0	0	0	0.14	0	0
Igfbp7	0.94	0.15	0.63	0	0	0	0	0	0	0	0.2	0	0	0.37	0	0	0
Stxbp4	0	0	0	0	0	0	0	0	0	0	0	0.02	0.08	0.17	0	0.07	0
Rpusd3	0	0	0	0.23	0	0	0.04	0	0	0	0	0	0	0	0	0	0
Anxa3	0.81	0	0.57	0.54	0	0	0.46	0	0	0	0	0	0.38	0	0	0	0.08
Wasf1	0	0	0	0	0	0	0	0	0.04	0	0	0	0	0	0	0	0
Apc	0	0	0	0	0	0	0	0	0.07	0.13	0.19	0.07	0	0	0	0	0
Hydin	0	0	0	0	0	0.11	0	0.21	0.13	0	0.25	0	0	0	0	0	0
Hsd17b11	0	0	0	0	0	0	0	0	0.11	0	0.55	0.86	0.11	0	0	0.15	0
Prnp	0	0	0	0	0	0	0	0	0	0	0.07	0	0.03	0	0	0	0
Shh	0	0	0	0	0.25	0	0	0	0	0	0.32	0.67	0.55	0.35	0.64	0	0
Fto	0	0.01	0	0.01	0	0.11	0.11	0	0.03	0.02	0.16	0.18	0	0	0	0.16	0
Gch1	0	0	0	0	0	0.2	0	0.49	0.15	0	0	0	0	0	0	0.15	0
Pla2g6	0	0.02	0.02	0.04	0	0	0	0	0	0	0	0	0	0	0	0	0
Klf7	0	0	0.41	0	0	0	0	0	0	0	0	0	0.11	0.09	0	0	0
Atp8b4	0.62	0	0.01	0	0	0	0	0	0	0	0.88	0	0	0	0	0	0.03
Zfp366	0.96	0	0.84	0.77	0	0	0.08	0	0	0	0	0	0	0	0	0	0
Dlst	0	0	0	0	0	0	0	0	0	0	0.1	0	0	0	0	0	0
Rala	0	0	0	0.01	0	0	0	0	0	0	0	0	0	0	0	0.17	0
Pir	0	0	0	0	0	0.04	0.03	0	0	0	0	0	0	0	0	0	0
Gabre	0	0	0	0.87	0	0.61	0.07	0	0	0	0	0.02	0	0	0	0	0
Ctbp1	0	0	0	0	0	0	0	0.02	0	0	0	0	0	0	0	0	0.17
Rgs9	0	0.08	0	0.12	0	0	0.13	0	0	0	0	0	0	0.02	0	0	0
Ddx10	0.15	0	0.02	0	0	0	0	0	0	0	0	0	0	0	0	0	0
Ivns1abp	0	0	0	0	0	0	0	0	0.21	0.37	0.01	0	0	0	0	0.23	0
Kcnh1	0	0.08	0.19	0	0	0.19	0	0	0.02	0	0	0	0	0	0	0	0
Plin5	0	0	0.06	0	0	0.07	0	0	0.63	0.47	0	0	0	0	0	0	0
Atp7b	0	0	0	0	0	0	0	0	0	0.43	0	0	0	0	0	0	0
Pcyt1b	0	0	0	0.45	0.12	0	0.09	0	0	0	0	0	0	0	0	0.14	0
Rmdn1	0.23	0	0.12	0	0	0	0	0	0	0	0	0.08	0	0	0	0	0
Ttc39c	0	0.07	0	0	0	0	0	0	0.03	0	0	0	0	0	0	0	0
Tet2	0	0	0	0.1	0	0	0.08	0	0	0	0	0	0	0.15	0	0	0
Diaph3	0	0	0	0	0.32	0	0	0	0.13	0.6	0	0	0	0	0	0	0
Dpp10	0.22	0.17	0	0	0	0.24	0.23	0	0.03	0.18	0	0	0	0	0.13	0.24	0
Ppp2r5b	0.06	0.24	0	0	0	0	0.07	0	0	0	0	0	0	0	0.02	0	0
Eya1	0.21	0	0	0	0	0	0	0	0	0	0.32	0.98	0.31	0.16	0	0	0
Htt	0.09	0.13	0.04	0.15	0	0.11	0.18	0	0.03	0	0	0	0	0	0	0	0
Amelx	0	0	0	0	0	0.42	0	0	0.42	0.64	0	0	0	0	0.55	0.22	0
Ccdc85a	0.17	0	0	0	0	0	0	0.13	0.37	0.21	0	0	0.11	0	0.12	0	0
Pbx1	0	0.19	0	0.23	0	0.22	0.17	0	0	0	0	0	0.18	0	0	0.04	0
Arhgap24	0.38	0	0.44	0.09	0	0	0.02	0	0.34	0.15	0	0	0	0	0.02	0	0
Hdac4	0.04	0.1	0.05	0.07	0	0.06	0	0	0	0	0	0.17	0	0	0	0	0
Tulp4	0	0	0	0	0	0.11	0	0	0	0.11	0	0	0	0	0	0	0
Stk40	0	0.02	0	0	0	0	0	0	0	0	0.03	0	0	0	0	0.28	0
Acap3	0	0	0.02	0	0	0	0	0	0	0	0	0	0	0	0	0	0
Rflna	0	0.27	0.05	0	0	0	0	0	0	0	0	0	0	0	0	0	0
Rhbdl3	0	0	0	0	0	0.24	0	0	0.62	0.4	0.72	0	0	0	0	0	0
Pacs1	0.03	0	0.08	0.18	0	0	0	0	0	0	0	0	0	0	0	0	0
Mrpl3	0	0	0	0	0	0	0	0	0.02	0	0	0	0	0	0	0	0
Gadd45g	0.17	0.26	0	0	0	0.11	0	0	0.21	0	0.63	0	0	0	0	0	0.04
Abat	0	0	0	0	0	0	0	0	0	0	0	0.14	0.13	0	0	0	0
Pag1	0.16	0.17	0.43	0	0	0	0	0	0	0	0	0	0.12	0.18	0	0	0
Lrrn1	0	0	0	0.39	0	0	0	0	0	0	0	0.6	0.22	0.12	0	0.04	0
Cttn	0	0	0	0.14	0	0	0	0	0	0	0	0	0	0	0	0.09	0
Tert	0.5	0.43	0.4	0.24	0	0	0	0	0	0	0	0	0	0	0	0	0.09
Fam20a	0	0	0.94	0	0	0	0	0.26	0	0	0.45	0	0	0	0	0	0
Map1b	0	0.16	0	0	0	0	0.22	0	0.2	0.09	0	0	0	0	0	0.18	0
Kdm3a	0	0	0.38	0	0	0	0	0	0	0	0	0.38	0	0.49	0	0	0
Parva	0	0	0	0	0	0	0	0	0	0	0.08	0.3	0.45	0.18	0.28	0.09	0.53
Dennd3	0.43	0.25	0.03	0	0	0	0	0	0	0	0	0	0	0	0	0	0
Cars2	0	0	0	0.07	0	0	0	0	0	0	0	0	0	0	0	0	0
Nrip1	0.09	0.29	0.42	0	0	0	0	0	0	0	0	0	0	0	0	0	0
Fam98a	0	0.03	0	0.07	0	0.04	0	0	0	0	0	0	0	0	0	0	0
Erich3	0	0	0	0	0	0	0	0	0	0.08	0	0.05	0	0	0.01	0.03	0
Ush1c	0	0	0	0	0	0	0	0.55	0	0	0.88	0.05	0	0	0	0.35	0
Il1r1	0.23	0	0.05	0.1	0	0.06	0	0.11	0.45	0	0	0	0	0	0	0	0.08
Itfg1	0	0	0.06	0	0	0.12	0	0	0	0.08	0	0	0	0	0	0.01	0
Nfx1	0.07	0	0	0.07	0	0	0	0	0	0	0	0	0	0	0	0	0
Orc2	0	0	0.14	0	0	0	0	0	0	0	0	0	0	0	0	0	0
Pdp1	0	0	0.31	0.17	0	0	0	0	0	0	0	0	0	0	0	0.19	0
Epha4	0	0.16	0	0.01	0	0.22	0.28	0	0	0	0	0	0	0	0	0	0
Paqr8	0	0	0	0	0.41	0	0.07	0	0.21	0	0	0	0.37	0	0	0.09	0
Rock1	0	0	0	0	0	0	0	0	0	0.15	0	0	0	0	0	0	0
Nrp1	0.47	0.58	0.22	0	0	0	0	0	0	0	0	0.83	0	0	0	0	0
Tmem131l	0	0.05	0	0	0	0.17	0.09	0	0.13	0.11	0.14	0	0.03	0	0	0.01	0
Tsta3	0.09	0.15	0.05	0.06	0	0.01	0	0	0	0	0	0	0	0	0	0	0
Ar	0	0	0	0	0	0	0.44	0	0	0	0.54	0	0	0	0	0	0
Nrxn3	0	0.04	0.36	0	0	0.21	0	0	0	0	0	0	0	0.21	0	0.21	0
Lef1	0	0	0	0.14	0	0	0.61	0	0	0	0.17	0	0	0.65	0.8	0	0
Atl2	0	0	0	0	0	0.18	0	0.04	0	0.08	0	0	0	0	0	0	0
Nfib	0	0	0	0	0	0	0	0	0	0	0.98	0.96	0	0.49	0	0.04	0
Srebf2	0	0	0.18	0.19	0	0.01	0	0	0	0	0	0	0	0.03	0	0	0
Amotl2	0	0.27	0.03	0.17	0	0	0	0	0	0	0.64	0.03	0	0	0	0	0
Hunk	0.12	0.2	0.42	0.46	0	0	0	0	0	0	0	0	0.14	0	0	0	0
Fndc5	0.22	0	0.05	0.33	0	0	0	0	0	0	0	0	0	0	0.09	0	0.65
Aff3	0.22	0.16	0.14	0.24	0	0.02	0.2	0	0	0	0	0	0.06	0.08	0	0	0
Cc2d2a	0	0	0	0.02	0	0	0	0	0	0	0	0	0	0	0	0	0
Slc4a7	0	0.04	0	0	0	0	0	0	0	0	0.29	0	0	0	0	0	0
Dpp6	0	0	0	0	0	0.05	0.03	0	0	0.02	0	0.24	0.21	0.19	0	0.09	0.08
Mtm1	0	0	0	0	0	0	0	0	0	0.16	0	0	0	0	0	0	0
Nova1	0.08	0.16	0	0.21	0	0.17	0.22	0	0.14	0.07	0.15	0.07	0.19	0.17	0.11	0.18	0
Hfm1	0	0	0	0	0	0	0	0	0	0	0.36	0	0.01	0	0	0	0
Grtp1	0.02	0	0	0	0	0	0.17	0	0	0.4	0	0	0.26	0.55	0.23	0	0
Dram1	0	0	0	0.16	0	0	0.73	0	0	0	0.21	0	0	0	0	0.67	0
Nrp2	0	0	0.12	0	0	0	0	0	0	0	0.16	0.71	0	0	0	0	0
Plcl1	0	0	0	0	0	0.18	0	0	0	0.15	0	0.24	0.42	0	0.12	0.15	0
Abcg1	0	0	0	0	0	0	0.01	0	0	0	0	0.03	0	0	0	0	0
Cnbd1	0	0	0	0	0	0.36	0	0	0.48	0.42	0	0	0	0	0.84	0	0
Ttc12	0	0	0	0.07	0	0	0.48	0	0	0	0	0.33	0.61	0.71	0	0.3	0
Pcdh17	0.17	0.57	0.07	0.08	0	0.05	0	0	0	0	0	0	0	0	0	0	0
Sema3e	0	0	0	0	0	0	0	0.36	0	0.37	0	0.76	0	0	0.86	0.33	0
Igdcc3	0.74	0.26	0.11	0	0	0.03	0	0	0	0	0	0	0	0	0.52	0	0
Ccdc134	0	0	0.86	0	0	0	0	0	0	0	0.02	0	0	0	0	0.17	0
Arntl2	0	0	0.11	0.07	0	0	0	0	0.02	0	0	0	0	0	0	0	0
Patj	0.07	0	0	0.2	0.09	0	0	0	0	0	0	0	0	0	0	0	0
Unc93b1	0.67	0.68	0.89	0	0	0	0	0	0	0	0	0	0	0	0	0	0
Musk	0	0	0	0	0	0.61	0	0	0	0.09	0.21	0.86	0	0.1	0	0	0
Dpyd	0	0.22	0.21	0	0	0.21	0	0	0.19	0.17	0	0	0.21	0	0	0.05	0
Npl	0.74	0.05	0	0	0	0	0	0	0	0	0	0	0	0	0	0	0
Abca3	0	0	0	0	0	0	0	0	0	0	0	0	0	0	0	0	0
Doc2b	0.09	0	0	0	0	0.16	0	0	0	0	0.37	0	0	0	0	0	0
Maats1	0	0	0	0	0	0	0	0	0	0	0.03	0	0.12	0	0	0	0
Trim75	0.82	0.15	0.51	0	0	0.99	0	0	0	0	0	0	0.44	0	0	0.1	0
Iqca	0	0	0	0	0	0.03	0	0	0	0	0.02	0	0	0	0.1	0	0
Pcolce2	0	0	0	0	0	0	0	0.08	0.54	0.38	0.7	0.07	0	0	0	0	0
Spint1	0.62	0.34	0.24	0	0	0	0	0.66	0.29	0.57	0	0	0	0	0	0	0
Vat1	0	0	0	0	0	0	0.03	0	0.18	0	0	0	0.07	0	0	0	0
Heca	0	0.57	0.05	0	0	0	0	0	0	0	0	0	0	0	0	0	0
Tmem47	0	0	0.06	0.46	0	0	0.68	0	0	0	0.29	0	0	0	0	0	0
Grk5	0	0	0	0	0	0	0.08	0	0	0	0	0	0	0	0.03	0.07	0
Tmem131	0	0	0	0	0	0.15	0	0.06	0	0.09	0	0	0.09	0	0	0.04	0
Pappa2	0	0	0	0	0	0	0.09	0.5	0.21	0.9	0	0	0	0	0.65	0.13	0
Alox12	0.03	0.51	0.53	0	0	0	0	0	0.07	0	0	0.38	0	0	0	0	0
Vopp1	0	0	0	0	0	0.07	0	0	0	0	0.1	0	0	0	0	0.06	0
Adgrl2	0	0.06	0.1	0	0	0	0	0	0	0.03	0	0	0	0	0.15	0	0
Nsdhl	0.19	0	0.05	0	0	0.08	0.08	0	0	0	0	0	0	0	0	0	0
Trpm6	0.29	0	0	0.59	0	0	0.66	0	0	0	0	0	0	0	0	0	0
Adamts1	0	0	0	0.11	0.95	0	0.4	0	0	0	0	0	0	0	0.48	0.09	0
Babam2	0	0.1	0	0	0	0.19	0	0	0	0.11	0	0	0	0	0	0	0
Col3a1	0	0	0	0	0.98	0	0.14	0	0.4	0	0.41	0	0	0	0	0	0
Gpr158	0.14	0	0	0	0	0	0	0	0	0	0.11	0.21	0.21	0.25	0	0.22	0
Psd3	0	0	0	0	0	0	0	0	0.02	0.19	0.11	0.13	0	0	0	0	0
Prep	0.01	0	0	0	0	0	0	0	0.03	0	0	0	0	0	0	0	0
Tle3	0.1	0	0	0	0.7	0	0.04	0	0	0	0.35	0.12	0	0	0	0.17	0
C530008M17Rik	0.15	0	0.34	0	0	0	0	0	0	0	0	0	0	0	0	0	0
Ndn	0	0	0	0	0	0	0	0	0	0	0	0.02	0	0.09	0	0	0
Adgrv1	0	0	0	0	0	0.24	0.19	0	0.03	0.05	0	0	0	0	0.19	0.22	0
Lnpep	0	0	0	0	0	0	0	0	0	0.03	0.01	0.04	0.22	0	0	0	0
Traf3ip1	0	0.05	0	0	0	0	0	0	0	0	0	0	0	0	0	0	0
11-Sep	0	0	0	0	0	0	0	0	0.1	0.08	0	0	0	0.01	0	0	0
Tpst1	0	0	0	0	0	0.05	0	0	0	0	0	0	0	0	0	0	0
Cyth1	0	0	0	0	0.11	0	0	0	0	0	0.04	0	0	0	0	0	0
Slc44a5	0.07	0	0.06	0	0	0.24	0	0	0	0.19	0	0	0.13	0	0.22	0.24	0
Mgst2	0.39	0	0.45	0.33	0.58	0	0	0	0	0	0	0	0	0.56	0.13	0	0
Pds5b	0	0.01	0.03	0	0	0.18	0	0	0	0	0	0.13	0.17	0	0	0.02	0
Afap1l2	0.09	0	0	0	0	0	0	0	0.64	0	0.81	0	0	0	0	0	0
Sytl4	0	0	0	0	0	0	0	0.07	0.58	0.72	0	0	0	0	0	0	0
Cdkl5	0	0	0	0	0	0	0.02	0	0	0	0	0	0	0.13	0	0	0
Pik3c2b	0	0.03	0.03	0	0	0	0	0	0	0	0	0	0	0	0	0	0
Frmd5	0.22	0.2	0.2	0	0	0	0	0	0	0	0.1	0.14	0	0	0	0	0
Adcy9	0	0	0	0	0	0	0	0.12	0.06	0	0	0.12	0	0	0	0	0
Rgs2	0	0.7	0.89	0	0	0.19	0	0	0	0	0	0	0.09	0	0	0	0
Scarb1	0.11	0.02	0	0	0	0.15	0	0	0	0	0	0	0	0	0	0	0
Fez2	0	0	0	0	0	0.01	0	0	0	0	0	0	0	0	0	0	0
Trim25	0.21	0	0	0	0	0	0	0	0	0	0.1	0.46	0	0	0	0	0
[truncated: 2,904 more rows]
