# Supplementary material for: Cross-species analysis defines the conservation of anatomically segregated VMH neuron populations
Source: eLife journal article supplement (doi:10.7554/elife.69065), 2021-05-21
Supplement: supp [file elife-69065-supp-v1.zip]

Archive with 21 entries (21 files):
- elife_poa_e69065_Transparent_Reporting_File.docx
- elife_poa_e69065_Figure_1_figure_supplement_1.pdf
- elife_poa_e69065_Figure_2_figure_supplement_1.pdf
- elife_poa_e69065_Figure_2_figure_supplement_2.pdf
- elife_poa_e69065_Figure_2_figure_supplement_3.pdf
- elife_poa_e69065_Figure_2_figure_supplement_4.pdf
- elife_poa_e69065_Figure_2_figure_supplement_5.pdf
- elife_poa_e69065_Figure_2_figure_supplement_6.pdf
- elife_poa_e69065_Figure_3_figure_supplement_1.pdf
- elife_poa_e69065_Figure_4_figure_supplement_1.pdf
- elife_poa_e69065_Figure_4_figure_supplement_2.pdf
- elife_poa_e69065_Figure_5_figure_supplement_1.pdf
- elife_poa_e69065_Figure_5_figure_supplement_2.pdf
- elife_poa_e69065_Supplementary_file_1.csv
- elife_poa_e69065_Supplementary_file_2.csv
- elife_poa_e69065_Supplementary_file_3.csv
- elife_poa_e69065_Supplementary_file_4.csv
- elife_poa_e69065_Supplementary_file_5.csv
- elife_poa_e69065_Supplementary_file_6.csv
- elife_poa_e69065_Supplementary_file_7.csv
- elife_poa_e69065_Supplementary_file_8.csv
