# Supplementary material for: Cross-species analysis defines the conservation of anatomically segregated VMH neuron populations
Source: eLife journal article supplement (doi:10.7554/elife.69065), 2021-05-21

### 6 classes

Mean: 0.17  
Cells above 0: 5465

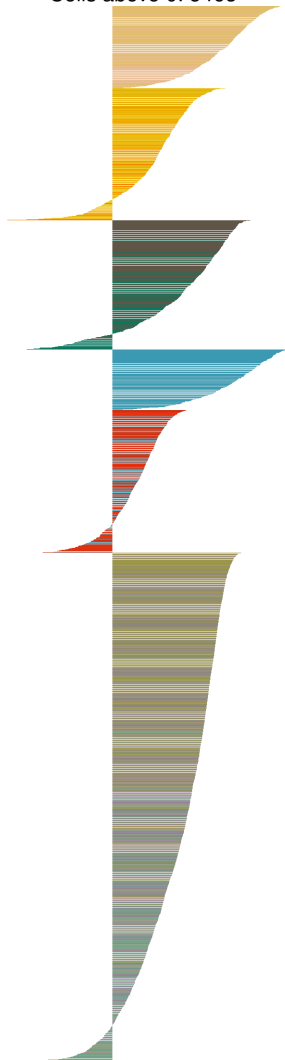

### 12 classes

Mean: 0.14  
Cells above 0: 4913

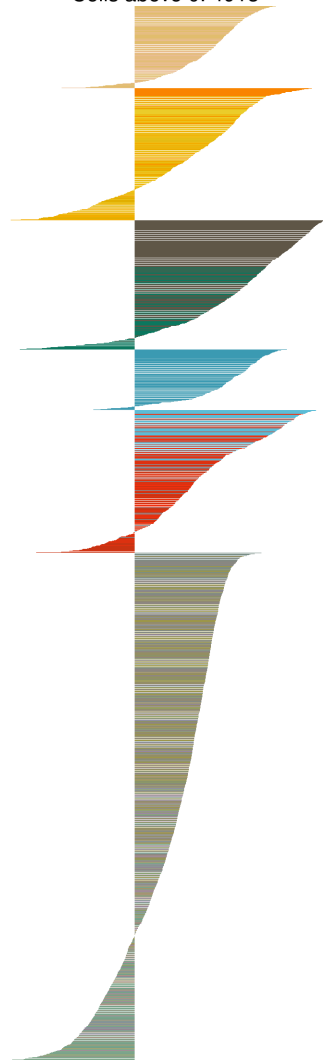

### 18 classes

Mean: 0.13  
Cells above 0: 4816

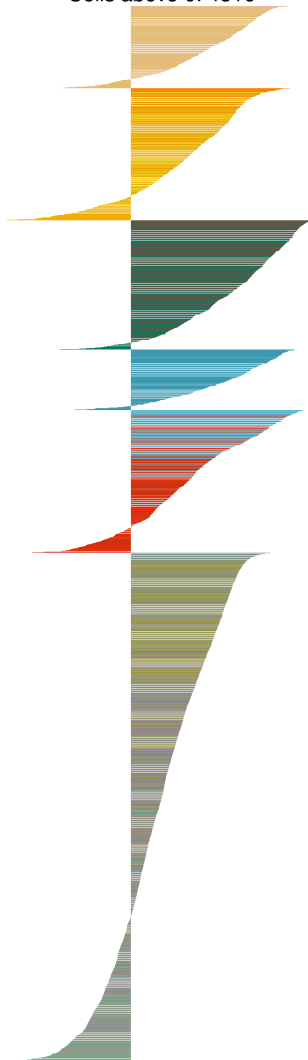

### 24 classes

Mean: 0.15  
Cells above 0: 5294

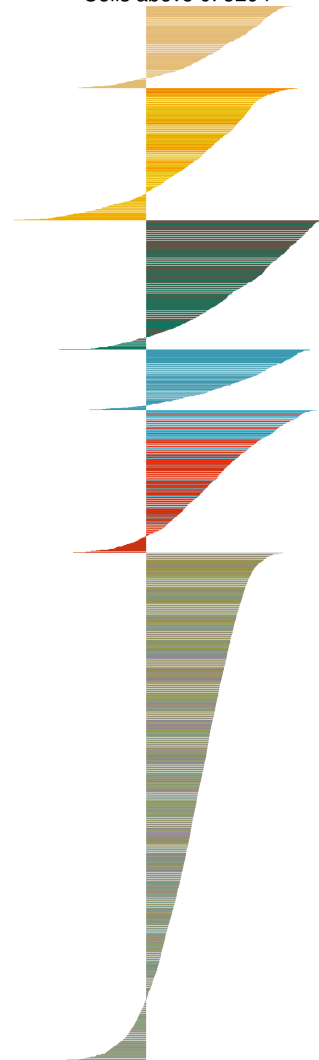

Supplement: supp [file elife-69065-supp-v1.zip › elife_poa_e69065_Figure_2_figure_supplement_3.pdf]
