# Supplementary material for: Cross-species analysis defines the conservation of anatomically segregated VMH neuron populations
Source: eLife journal article supplement (doi:10.7554/elife.69065), 2021-05-21
Supplement: supp [file elife-69065-supp-v1.zip › elife_poa_e69065_Supplementary_file_1.csv]

Gene	Bead	Sup	Enrichment	P
2300002M23Rik	0.69	0.01	5.82	5.3e-04
Gm136	0.65	0.03	4.67	3.5e-03
Gm44389	1.38	0.02	4.51	5.0e-04
Cre	3.14	0.19	4.08	5.3e-12
Fer1l4	0.56	0.03	3.99	8.2e-03
Nr5a1	262.68	17.3	3.93	7.1e-154
Gm12031	1.07	0.08	3.82	1.5e-04
Gm27208	0.76	0.06	3.64	1.9e-03
Nr5a1os	5.52	0.51	3.64	3.3e-13
Gpx6	0.68	0.07	3.46	4.6e-03
Gfp_L10a	106.58	10.17	3.41	6.9e-89
Fam166a	0.71	0.08	3.18	5.4e-03
Fezf1	245.65	27.16	3.18	1.1e-180
9130024F11Rik	6.85	0.82	3.07	4.4e-19
Prss30	3.06	0.37	3.04	4.0e-09
Sox14	24.55	3.02	3.02	6.2e-55
Nr0b1	11.95	1.52	3	2.5e-25
Lbhd2	87.9	11.54	2.93	2.2e-69
Cyp19a1	1.35	0.19	2.92	4.9e-04
Lhx3	2.95	0.43	2.91	2.1e-07
Cdc20b	4.81	0.66	2.88	7.7e-12
Nptx2	133.06	18.15	2.87	3.5e-133
Gm10735	0.79	0.12	2.83	8.3e-03
Kank4os	0.89	0.12	2.82	4.0e-03
H2-T-ps	5.23	0.74	2.81	1.1e-12
Spint1	6.05	0.87	2.78	1.8e-13
Il23a	0.59	0.12	2.77	3.1e-02
Prdm13	18.09	2.66	2.77	1.6e-37
Ifi27l2a	2.7	0.4	2.73	5.3e-07
Ifi202b	0.95	0.14	2.7	4.1e-03
Rgs14	46	7.3	2.69	9.0e-44
Nrgn	468.85	72.68	2.69	1.7e-106
Umodl1	8.57	1.33	2.69	1.4e-19
H2-Q2	69.28	10.99	2.65	1.3e-88
Cd6	0.62	0.11	2.65	3.0e-02
Gm39653	2.89	0.47	2.61	3.9e-07
Rai14	31.2	5.12	2.6	7.0e-52
Ccdc42	7.04	1.18	2.59	2.5e-15
Krt18	15.21	2.54	2.58	3.8e-28
Rin1	35.06	6	2.56	1.1e-46
Pomc	29.8	4.84	2.53	1.4e-06
Glipr1	2.71	0.47	2.52	4.8e-06
AC165278.2	0.75	0.13	2.5	1.4e-02
Gm16150	3.01	0.54	2.49	4.9e-07
4933406B17Rik	5.29	0.95	2.48	6.0e-11
Satb2	30.91	5.61	2.46	8.1e-47
6430628N08Rik	8.44	1.56	2.45	2.1e-16
Gpr149	77.42	14.42	2.42	4.6e-81
Rasl11a	7.25	1.41	2.41	3.6e-13
Itpka	26.12	4.9	2.4	7.5e-33
Bahcc1	169.56	32	2.4	1.9e-98
Nmu	1.69	0.29	2.38	1.5e-03
C1ql2	52.82	10.23	2.37	2.6e-59
Igbp1b	3.28	0.63	2.36	5.0e-07
Cfap73	3.34	0.66	2.34	3.7e-07
Lipg	2.22	0.44	2.31	4.4e-05
Chrm5	54.44	10.9	2.31	1.0e-55
2310007B03Rik	1.48	0.3	2.3	9.9e-04
Gdf6	1.13	0.21	2.3	8.6e-03
C130093G08Rik	64.46	13.38	2.26	5.0e-63
Rprml	17.06	3.64	2.25	4.8e-19
Itgad	1.25	0.25	2.23	7.1e-03
Gm10134	0.76	0.17	2.23	2.5e-02
Gm20751	1.24	0.27	2.22	3.8e-03
Akr1cl	0.77	0.17	2.22	2.5e-02
Tnfrsf8	48.83	10.55	2.2	3.5e-46
Lamb3	21.45	4.78	2.17	2.4e-29
Sec14l3	9.79	2.17	2.15	1.3e-15
Camkv	1045.75	236.34	2.15	5.9e-67
Qrfpr	17.21	3.85	2.15	1.4e-23
Gm12408	5.97	1.36	2.13	1.6e-10
Ccnjl	10.23	2.34	2.13	4.9e-15
Tmem35a	231.83	52.26	2.13	1.2e-75
Rasal1	175.8	40.43	2.13	8.6e-59
Duox2	0.82	0.18	2.13	2.4e-02
Nkd2	44.71	10.27	2.13	2.2e-48
Tll2	8.25	1.9	2.11	6.0e-11
Acp7	1.89	0.45	2.07	6.3e-04
Mc3r	19.34	4.61	2.07	1.8e-26
Ptk2b	140.5	33.57	2.06	7.9e-63
Adcyap1	286.69	67.96	2.06	3.3e-82
Aunip	0.73	0.17	2.05	4.3e-02
Ddn	159.51	38.98	2.04	1.1e-64
Cckbr	28.99	7.03	2.03	2.3e-30
Doc2a	80.68	20.09	2.02	6.3e-37
Cmtm8	1.64	0.41	2.01	2.2e-03
Gpr150	7.41	1.83	2.01	3.5e-11
Slit3	85.53	21.16	2	2.3e-54
Gm43579	0.97	0.25	1.99	2.1e-02
Camk1g	191.7	48.47	1.99	1.8e-80
Gbgt1	6.85	1.74	1.98	4.9e-10
Oxtr	30.81	7.89	1.96	2.3e-33
Tmem215	17.43	4.48	1.96	5.8e-22
Kcnh3	8.26	2.16	1.94	1.5e-11
Rbp3	2.41	0.63	1.94	2.9e-04
Tnrc18	400.27	104.02	1.94	6.0e-69
Pdyn	166.01	42.65	1.94	4.2e-53
Atp6v1c2	10.82	2.83	1.94	2.0e-14
Grhl1	51.39	13.56	1.92	2.0e-44
Doc2b	538.74	142.45	1.92	2.2e-61
Pdzd3	2.28	0.64	1.91	5.2e-04
Cnih3	97.73	26.21	1.9	2.1e-35
Gm26917	391.53	100.89	1.9	1.0e-07
Gpr88	48.49	12.93	1.9	8.3e-42
Npy4r	1.19	0.31	1.9	1.8e-02
Yeats2	114.19	30.87	1.89	8.8e-61
Baiap2	215.62	58.63	1.88	9.0e-53
Gm44618	0.84	0.23	1.88	3.9e-02
E130006D01Rik	1.03	0.3	1.88	3.3e-02
Msln	2.89	0.81	1.87	4.2e-04
Slc9a2	10.48	2.87	1.87	1.2e-13
Rxrg	83.67	23.13	1.86	7.6e-40
Chst8	44.4	12.28	1.85	6.9e-32
Cbln1	304.35	83.98	1.85	1.2e-63
Gm31408	0.9	0.25	1.85	3.7e-02
Disp3	107.98	29.66	1.85	9.9e-44
H2-Q10	0.94	0.26	1.84	3.3e-02
Gm9989	0.97	0.28	1.83	4.7e-02
Sox3	7.83	2.24	1.83	1.1e-09
Esyt3	51.61	14.52	1.83	7.5e-42
Rerg	111.25	31.55	1.82	1.3e-55
H2-Q4	1.34	0.36	1.81	1.5e-02
Nlrp6	1.06	0.31	1.8	2.9e-02
Ccdc88b	6.17	1.75	1.8	3.8e-08
Nms	1.75	0.55	1.8	7.8e-03
Aldh3b2	17.29	5.05	1.78	2.4e-18
Icam5	38.9	11.36	1.78	2.8e-28
Rpusd1	110.11	32.34	1.78	1.2e-36
Cmbl	47.3	13.96	1.76	1.0e-35
Lmo3	292.54	86.44	1.76	1.5e-68
Cited1	38.43	11.39	1.76	5.6e-32
Lrrn4	9.28	2.75	1.76	2.9e-11
Nkx2-1	82.61	24.74	1.76	8.2e-33
Zfp831	63.56	18.87	1.75	6.8e-41
Barx2	8.97	2.72	1.74	2.0e-10
Stx1a	161.05	48.58	1.74	8.7e-32
Smpdl3b	5.12	1.53	1.74	2.6e-06
Hs3st4	172.73	51.83	1.74	6.7e-59
Ets2	368.47	110.8	1.73	3.0e-66
Gm43333	1.25	0.35	1.73	2.2e-02
Chrm1	40.17	12.15	1.72	9.8e-31
Acaa1b	1.06	0.33	1.71	3.5e-02
Bpifb1	1.4	0.43	1.71	1.4e-02
Dpt	1.1	0.35	1.71	3.8e-02
AI467606	10.4	3.15	1.71	1.9e-11
Mst1r	5.57	1.69	1.7	4.5e-07
Tppp3	316.7	98.18	1.7	1.9e-29
Hk2	22.03	6.76	1.7	1.4e-19
Fxyd7	80.66	25.07	1.69	1.1e-40
Smco4	12.55	3.93	1.68	4.5e-12
Amigo2	143.47	44.5	1.68	1.8e-47
Egr4	7.36	2.37	1.68	1.9e-07
Hsd17b2	1.1	0.35	1.67	3.4e-02
Tgm3	2.73	0.88	1.66	8.5e-04
Hes6	49.46	15.85	1.65	1.7e-26
Mhrt	2.35	0.76	1.65	1.5e-03
Gm10605	11.58	3.66	1.65	1.6e-10
Efnb1	23.99	7.64	1.64	8.5e-21
Arhgap6	147.15	47.12	1.64	5.2e-50
Vgll2	2.43	0.76	1.64	2.0e-03
Plxdc1	52.17	16.71	1.64	2.0e-33
Tmem132a	97.31	30.86	1.64	7.8e-29
Gda	735.41	236.97	1.63	5.8e-64
Krt77	35.82	11.64	1.63	1.1e-25
Sema4f	133.28	42.95	1.62	1.5e-39
Chia1	3.97	1.29	1.62	5.3e-05
Nab2	20.91	6.86	1.62	1.5e-14
A830011K09Rik	3.91	1.29	1.61	5.1e-05
Gm10941	1	0.32	1.61	4.9e-02
Hcrtr1	14.3	4.69	1.61	1.3e-13
Nptx1	374.37	122.15	1.61	2.7e-57
Ankrd33b	9.26	3.11	1.59	1.5e-08
Nr2f2	264.5	87.7	1.59	1.0e-54
Dgkg	195.91	65.21	1.59	2.4e-45
Gpr6	5.62	1.84	1.59	1.3e-05
Zbtb7c	55.93	18.81	1.58	1.4e-30
Egr3	14.58	4.83	1.58	3.5e-13
Npffr1	35.25	11.73	1.58	2.9e-21
Sox1	115.79	38.75	1.58	7.5e-44
Tmem158	52.93	17.73	1.58	5.7e-27
Dmrtc1a	22.91	7.67	1.58	2.1e-19
Rasd1	22.74	7.7	1.58	1.8e-15
Samd7	3.36	1.15	1.58	3.5e-04
Tshr	3.43	1.14	1.57	2.5e-04
Kncn	1.96	0.66	1.57	5.5e-03
Crtc1	434.42	146.33	1.57	5.1e-42
Klf16	71.96	24.35	1.57	7.5e-25
Hrh1	45.24	15.31	1.57	1.6e-29
Gabra5	146.03	49.3	1.56	2.5e-44
Rrad	20.45	6.95	1.56	7.5e-17
Nkx2-9	1.46	0.52	1.56	2.4e-02
Ctxn1	282.65	96.64	1.55	7.4e-37
B130046B21Rik	1.35	0.48	1.55	3.1e-02
Fam110a	29.05	9.99	1.55	3.5e-21
Sstr3	40.83	14.08	1.54	2.6e-23
Rab38	1.77	0.61	1.54	1.3e-02
A330009N23Rik	2.8	0.99	1.54	1.4e-03
Kcnip2	125.31	43.57	1.53	3.7e-34
Myh6	8.26	2.88	1.53	7.2e-08
Crip2	123.06	42.89	1.53	2.6e-32
Ajap1	77.85	27.08	1.52	4.1e-32
Hapln4	224.46	77.64	1.52	3.9e-35
Gck	42.73	14.96	1.52	8.5e-22
Fam131a	229.41	80.58	1.52	1.7e-30
Slc17a8	6.15	2.2	1.51	1.1e-05
Prr15	1.61	0.57	1.5	1.8e-02
Slc24a4	27.68	9.72	1.5	6.5e-19
Steap3	9.49	3.35	1.5	3.4e-09
Itpr1	540.77	191.58	1.5	9.9e-55
Elk1	101.2	35.9	1.49	1.6e-33
Cacng6	1.19	0.44	1.49	4.6e-02
Nek2	2.33	0.84	1.49	4.0e-03
Mtfp1	97.96	35.16	1.49	2.9e-26
Ildr1	1.48	0.52	1.48	2.6e-02
Hipk4	54.52	19.44	1.48	9.4e-29
Mc4r	5.53	2.06	1.48	9.9e-05
Kcnab1	142.96	51.44	1.47	6.2e-41
Fkbp1a	728.43	263	1.47	5.0e-52
Coro1a	91.63	33.15	1.47	7.3e-29
Rab11fip1	12.75	4.62	1.47	6.7e-11
Cdh13	229.72	82.78	1.46	3.7e-43
6330403K07Rik	2329.91	852.55	1.46	4.1e-40
Klf14	1.51	0.54	1.46	2.6e-02
Macrod1	21.44	7.8	1.46	1.3e-13
Etnk2	39.85	14.6	1.45	2.1e-19
Tesc	11.3	4.17	1.45	2.1e-09
C3	4.53	1.68	1.45	8.1e-05
Galnt18	33.87	12.4	1.44	9.0e-19
Lama1	22.3	8.22	1.44	6.8e-16
Camkk2	210.6	77.88	1.43	1.8e-34
Shisa2	16.11	6	1.43	1.9e-11
Hpcal4	1596.91	593.51	1.43	3.5e-42
Atp1a1	537.85	196.89	1.43	5.9e-38
D630023F18Rik	11.89	4.41	1.43	1.3e-09
Rasgrf2	1214.39	450.12	1.43	1.1e-48
Itga11	3.12	1.17	1.43	1.2e-03
2900079G21Rik	2.39	0.9	1.43	1.1e-02
Ano3	32.92	12.19	1.42	9.8e-19
Cdh4	124.76	46.52	1.42	2.7e-35
Gamt	23.25	8.92	1.42	2.4e-12
Fank1	16.6	6.28	1.41	6.4e-12
Gm26805	9.48	3.61	1.41	1.4e-07
Amz1	49.73	18.88	1.4	2.2e-19
Rab40b	23.02	8.74	1.4	8.6e-16
Spata2l	25.09	9.53	1.39	6.7e-15
Nol4	248.42	94.71	1.39	1.1e-41
Xkrx	3.53	1.35	1.39	8.1e-04
Ngb	214.09	82.25	1.39	7.3e-26
Sntg2	13.37	5.08	1.39	2.5e-10
6820408C15Rik	7.21	2.77	1.39	1.5e-06
Reep6	9.58	3.67	1.39	5.4e-08
Mn1	96.25	36.72	1.38	7.1e-21
Syt5	181.82	69.4	1.38	1.2e-30
Pi16	11.83	4.57	1.38	1.6e-08
Susd2	58.47	22.38	1.38	5.2e-26
Myh7	16.09	6.18	1.38	1.1e-11
Calb1	679.37	261.23	1.38	1.0e-49
Ankrd34b	213.14	82	1.38	2.4e-42
Nell2	348.54	132.65	1.38	2.8e-35
Vdac3-ps1	1.67	0.63	1.37	2.6e-02
Phyhip	442.07	171.01	1.37	2.9e-34
Gstm4	25.8	10.04	1.37	4.4e-14
Rai1	256.17	98.8	1.37	7.0e-25
BC022687	30.51	11.84	1.37	3.7e-13
Glra1	59.62	23.2	1.36	7.6e-27
Rbfox1	378.85	147.51	1.36	1.0e-44
Dctn1	908.81	355.37	1.36	1.8e-31
Wnt5a	37.67	14.64	1.36	9.1e-21
Il34	36.06	14.01	1.36	8.8e-15
Galnt17	153.82	59.73	1.36	8.6e-33
Acvr1c	28.7	11.1	1.36	1.5e-15
Pak6	132.92	52.33	1.35	9.6e-25
Kremen2	2.76	1.08	1.35	6.3e-03
Pstpip1	2.01	0.8	1.35	1.8e-02
E430024P14Rik	12.74	5	1.34	1.3e-08
Cstad	3.88	1.52	1.34	2.0e-03
Gm32569	1.64	0.62	1.34	3.8e-02
Palmd	18.41	7.29	1.34	4.2e-12
Isyna1	97.99	39.16	1.34	1.6e-19
Srf	81.04	32.4	1.34	1.4e-20
Mycn	8.48	3.37	1.33	8.4e-07
Ssbp4	114.84	45.81	1.33	1.2e-15
C1qtnf2	2.34	0.94	1.33	1.0e-02
Prtn3	2.78	1.14	1.33	7.0e-03
Tmem198	37	14.65	1.33	3.1e-13
Rab26	51.11	20.42	1.33	5.0e-19
Rps6ka2	214.85	85.71	1.33	1.6e-33
Entpd6	124.05	48.85	1.33	9.5e-28
Kir3dl2	2.24	0.89	1.33	1.1e-02
Gm13889	32.77	13.25	1.33	5.2e-12
Sox1ot	93.59	37.31	1.33	1.3e-28
Cnga4	2.01	0.83	1.32	1.9e-02
Fam43b	49.09	19.83	1.32	5.3e-14
Ncdn	2347.16	941.57	1.32	6.6e-04
Lamc2	2.45	0.98	1.32	8.0e-03
Srrm4	183.21	73.48	1.32	4.0e-37
Ap1s1	303.43	122.24	1.32	4.8e-27
Cadps2	304.32	122.09	1.32	6.2e-41
2010204K13Rik	71.39	28.67	1.32	5.3e-25
Nmbr	4.14	1.65	1.32	5.8e-04
She	2.95	1.19	1.32	3.4e-03
1700001L19Rik	28.25	11.39	1.31	4.2e-15
Wfs1	117.91	47.44	1.31	1.8e-31
Plek2	1.55	0.62	1.31	3.9e-02
Deptor	178.3	72.3	1.3	3.5e-36
Bcor	69.34	28.08	1.3	1.2e-19
Fam81a	168.22	68.46	1.3	6.7e-34
Mroh7	26.12	10.5	1.3	1.9e-14
Trpa1	1.58	0.65	1.29	4.7e-02
Prr7	18.4	7.61	1.29	8.4e-08
Tnfaip8l3	26.89	11.02	1.28	6.4e-15
Tmem28	78.24	32.41	1.28	2.5e-21
Vsig2	4.25	1.76	1.28	7.5e-04
Fgfr1	153.53	63	1.28	7.5e-29
Grasp	8.3	3.42	1.28	3.0e-06
Galnt16	409.31	167.63	1.28	8.7e-33
Synpo	102.51	42.54	1.27	2.7e-23
Car10	215.7	89.12	1.27	4.1e-34
Prss12	4.79	1.97	1.27	3.5e-04
Ung	3.3	1.36	1.27	5.1e-03
Impdh1	91.34	37.86	1.27	5.7e-20
Crym	7.9	3.27	1.27	5.1e-06
Slc8a2	153.07	62.96	1.27	2.2e-27
Pcsk4	7.06	2.96	1.26	3.4e-05
Fndc1	31.03	12.91	1.26	7.0e-16
Kctd13	114.72	48.3	1.26	2.9e-20
Rhov	40.31	16.95	1.26	3.2e-14
Rnf208	228.75	95.92	1.26	9.1e-22
Tceal3	142.09	59.91	1.26	2.2e-27
Mapk3	298	125.29	1.25	3.4e-25
Gpr165	279.17	116.92	1.25	1.2e-25
Fndc9	48.97	20.41	1.25	1.2e-16
Bdnf	32.31	13.56	1.25	9.2e-16
Hnf1b	5.87	2.47	1.25	7.3e-05
1700007K13Rik	3.7	1.57	1.24	2.1e-03
Itm2c	781.38	329.74	1.24	8.2e-32
Pid1	122.82	52.15	1.24	8.6e-28
Dpysl4	62.25	26.75	1.24	9.0e-19
Dph2	21.53	9.23	1.23	2.4e-10
Pdlim7	33.67	14.51	1.23	4.2e-13
Col6a3	9.11	3.86	1.23	2.9e-06
Zfp239	91.22	38.79	1.23	1.4e-23
Aard	17.42	7.53	1.23	1.4e-09
Tekt5	42.31	18.15	1.23	2.7e-14
Mmp17	110.92	47.23	1.22	3.3e-21
Nkx2-2	22.08	9.43	1.22	7.5e-10
Pde2a	3.86	1.62	1.22	2.6e-03
Rps6ka4	68.41	29.61	1.22	1.5e-14
Angptl6	5.76	2.51	1.22	2.5e-04
Syngap1	354.86	153.1	1.22	8.3e-28
Cxxc1	60.23	26.22	1.21	9.5e-16
Fam189b	40.5	17.47	1.21	1.1e-16
Pnmal1	598.06	258.17	1.21	3.2e-35
Dusp2	2.07	0.9	1.21	3.1e-02
Hrh3	85.91	37.21	1.21	7.3e-20
Chst1	228.28	98.66	1.21	3.9e-27
Krt9	1.87	0.8	1.21	3.5e-02
Ephx1	12.9	5.57	1.21	2.0e-07
Unc5a	91.27	39.53	1.21	2.0e-19
Rnf112	228.85	99.47	1.21	4.2e-24
Togaram2	23.76	10.31	1.2	1.0e-10
P4ha3	11.25	4.86	1.2	5.1e-07
Kcnu1	4.95	2.14	1.2	9.4e-04
Gldn	11.1	4.78	1.19	5.4e-06
Kdr	3.66	1.6	1.19	3.1e-03
Myc	6.74	2.96	1.19	5.8e-05
Kcnj5	32.44	14.13	1.19	2.3e-12
Ankrd34a	129.96	57.46	1.19	1.0e-16
Pde8b	174.08	76.68	1.19	2.3e-28
Kbtbd11	288.88	127.11	1.18	1.5e-28
Fstl4	42.92	18.78	1.18	1.5e-15
Fam212b	23.03	10.17	1.18	2.2e-11
Pcdhb1	2.58	1.12	1.18	1.5e-02
Oprd1	19.35	8.46	1.18	2.3e-09
Hspa1b	3.02	1.33	1.18	7.5e-03
Tmem179	324.79	143.04	1.18	2.2e-21
Slc25a22	333.17	148.79	1.17	3.5e-20
Ube2ql1	333.48	147.99	1.17	1.9e-22
Mindy4b-ps	3.9	1.78	1.17	3.5e-03
Prmt8	48.79	21.77	1.17	7.9e-18
Tmem9	97.21	42.95	1.17	6.7e-19
Rgl1	266.11	118.71	1.17	1.5e-28
Wipf3	53.14	23.76	1.16	5.1e-19
Gm13420	1.78	0.8	1.16	4.9e-02
Kcnk4	5.95	2.69	1.16	6.6e-04
Ttc9b	48.69	22.29	1.16	3.2e-11
3110082I17Rik	10	4.56	1.16	9.3e-06
Ldb2	93.28	41.8	1.16	3.2e-24
Cyb5r1	28.6	12.63	1.16	1.9e-11
Prr12	243.8	109.23	1.16	4.0e-15
Mkl2	584.9	262.08	1.16	1.9e-34
Fancd2	3.45	1.56	1.15	6.0e-03
Hap1	2310.19	1047.8	1.15	3.3e-23
H2-Bl	2.96	1.32	1.15	9.9e-03
Pcdhga9	8.56	3.89	1.15	5.9e-05
Pnck	444.13	200.83	1.15	2.0e-19
Pik3r2	115.03	52.12	1.15	1.1e-14
Svop	260.98	117.27	1.15	1.1e-24
Aplp1	1222.6	545.02	1.15	3.6e-23
Cdhr2	10.47	4.77	1.15	4.7e-06
Lingo3	37.88	17.01	1.15	1.1e-13
Scn5a	74.77	33.6	1.15	4.3e-19
Hs3st3b1	3.62	1.64	1.15	5.7e-03
Sssca1	24.69	11.32	1.14	5.3e-09
H1fx	23.07	10.62	1.14	1.9e-07
Slit2	172.62	77.74	1.14	1.1e-26
Klf5	23.18	10.5	1.14	8.8e-11
Slc9a5	41.07	18.59	1.14	7.0e-14
Rap2b	72.57	32.9	1.14	2.9e-17
Pnma1	19.96	9.16	1.13	7.9e-09
Jph4	499.84	228.64	1.13	1.9e-18
Ppp3ca	999.8	455.45	1.13	6.4e-34
Agap2	733.03	335.57	1.13	7.3e-20
Grcc10	16.21	7.46	1.13	2.4e-07
Sowaha	55.76	25.66	1.13	3.8e-14
Fbxw7	218.08	99.43	1.13	1.4e-27
Gm44210	4.99	2.32	1.13	1.8e-03
Pnmal2	2116.5	971.5	1.13	7.0e-22
Arhgap36	242.39	110.81	1.13	6.4e-25
Pik3r5	4.93	2.26	1.13	1.1e-03
Nr5a2	4.16	1.93	1.13	2.5e-03
Matk	121.82	56.28	1.13	3.2e-16
Adamts9	13.78	6.34	1.13	1.4e-07
Homez	46.01	21.18	1.13	3.3e-14
Zfp553	52.16	24.02	1.13	3.0e-13
Ly6h	231.49	106.06	1.12	6.8e-23
Pld3	536.3	244.61	1.12	1.9e-25
Kcnj4	12.2	5.63	1.12	3.0e-06
Lrrc73	52.69	24.55	1.12	4.8e-12
Extl1	46.03	21.16	1.12	7.4e-15
Sgsh	17.74	8.17	1.12	3.8e-09
Map3k5	121.24	55.84	1.12	5.4e-24
Pcdhgc5	27.99	12.8	1.12	1.0e-11
March9	45.04	20.83	1.12	1.4e-14
Plppr2	133.99	61.65	1.12	1.2e-21
H2-T22	15.45	7.14	1.12	4.5e-08
Spint2	61.02	28.02	1.11	1.4e-15
Cacnb1	214.03	99.4	1.11	2.3e-19
Cebpa	12.05	5.58	1.11	1.8e-06
Zdhhc7	56.19	25.97	1.11	8.0e-15
Hspa1a	4.04	1.88	1.11	3.4e-03
Kcnk12	5.63	2.62	1.11	1.7e-03
Pcdhga12	13.42	6.14	1.11	6.3e-07
Prss36	6.3	2.94	1.11	4.1e-04
Col20a1	2.6	1.19	1.11	2.0e-02
Relt	28.02	12.89	1.11	2.1e-10
Cfap61	11.14	5.19	1.11	2.4e-06
Aprt	27.9	13.07	1.1	3.4e-10
Rbfox3	228	106.79	1.1	2.0e-19
Coch	15.8	7.21	1.1	2.8e-07
BC051226	3.32	1.56	1.1	9.8e-03
Sema6b	153.38	71.17	1.1	2.2e-16
Celf3	165.72	77.82	1.1	1.5e-21
Proser2	8.09	3.8	1.1	1.2e-04
Rac3	74.71	35.08	1.1	7.5e-14
Iqsec2	150.87	70.5	1.1	2.1e-23
Hs3st5	24.97	11.71	1.1	2.9e-10
Pifo	3.87	1.8	1.1	4.6e-03
Rnaseh2c	17.37	8.22	1.1	1.8e-06
Josd1	87.26	40.86	1.1	4.2e-18
Plch2	55.18	25.81	1.09	1.0e-14
Sf3b5	28.31	13.43	1.09	2.2e-09
Cfap45	8.99	4.2	1.09	3.1e-05
Tceal6	58.47	27.7	1.09	2.5e-15
2310030G06Rik	3.87	1.79	1.08	6.7e-03
Edaradd	2.49	1.18	1.08	3.8e-02
Erc2	262.67	124.23	1.08	3.8e-27
Plcz1	4.06	1.92	1.08	9.4e-03
Frat1	44.15	20.95	1.08	4.6e-10
Prkg1	43.62	20.66	1.08	4.1e-15
Gtpbp3	44.7	21.41	1.08	1.1e-10
Tomm34	154	72.99	1.08	1.1e-20
Btbd11	192.06	91.01	1.08	4.3e-23
Gse1	128.18	61.02	1.08	3.9e-18
Rtn4r	10.58	5.04	1.07	2.7e-05
Oaz1-ps	2.24	1.06	1.07	4.1e-02
Nek10	30.5	14.56	1.07	7.5e-12
Arxes2	76.01	36.11	1.07	3.0e-13
Enc1	576.6	274.78	1.07	1.6e-27
Mink1	279.87	133.78	1.07	1.1e-21
Rrp7a	100.24	48.17	1.07	7.5e-12
Neurl2	2.32	1.11	1.07	4.1e-02
Thra	1134.38	543.9	1.07	5.3e-17
1110017D15Rik	3.9	1.85	1.07	6.8e-03
Morf4l2	320.2	152.48	1.07	1.5e-26
Oprl1	222.14	105.68	1.07	3.3e-22
Efna3	29.15	13.87	1.07	1.1e-10
Prpf8	644.64	308.2	1.07	4.4e-29
Ak4	102.91	49.25	1.07	6.1e-21
Ccdc157	71.96	34.59	1.06	3.8e-17
Chchd10	93.19	44.96	1.06	2.5e-13
Drd1	10.64	5.06	1.06	7.0e-06
Gpr83	50.86	24.18	1.06	1.1e-14
Map2k1	545.75	261.87	1.06	1.1e-26
Arf5	160	77.01	1.06	1.6e-12
Ssx2ip	248.28	118.91	1.06	2.4e-26
Lrguk	28.16	13.49	1.06	4.7e-10
Col8a1	7.57	3.62	1.06	1.2e-04
Tcerg1l	55.18	26.5	1.06	1.2e-15
Syt6	121.36	58.23	1.06	2.3e-21
Fkbp5	74.09	35.78	1.06	1.2e-16
Gdpd5	18.54	8.86	1.06	1.7e-08
Lzts1	65.31	31.56	1.06	2.4e-14
Mboat7	357.18	170.47	1.06	2.0e-25
Trmt61a	27.85	13.49	1.06	9.8e-09
Cdh15	8.98	4.42	1.06	3.9e-04
Cdh22	76	36.51	1.06	1.2e-15
Pop5	32.58	15.78	1.05	3.1e-10
Rassf7	3.33	1.6	1.05	1.2e-02
Ctu1	24.14	11.68	1.05	8.5e-08
Rtp1	3.46	1.7	1.05	1.2e-02
Dusp23	4.59	2.23	1.05	4.5e-03
Zfp575	13.28	6.47	1.05	2.1e-06
Fam105a	9.36	4.48	1.05	3.9e-05
Gpr27	50.85	24.65	1.05	6.7e-15
Sh2d5	109.35	53.56	1.04	2.6e-14
Psmd3	218.13	106.52	1.04	8.1e-15
Dlk2	22.72	11.05	1.04	1.3e-07
R3hdm4	77.22	37.55	1.04	1.0e-16
Htr1b	45.58	22.12	1.04	7.8e-12
Acap3	100.54	49.36	1.04	2.1e-14
Rap2a	333.58	162.6	1.04	5.3e-24
Nr2c2ap	4.34	2.11	1.04	5.0e-03
Lcp2	5.1	2.49	1.04	1.9e-03
Armcx6	10.01	4.89	1.04	2.4e-05
Brd3os	57.72	28.26	1.04	1.2e-12
Gm17322	3.68	1.77	1.04	1.3e-02
Camk2b	1412.09	695.36	1.04	1.2e-18
Adgra1	145.97	71.19	1.03	3.5e-22
Cyp46a1	84.81	41.22	1.03	3.0e-16
Cpne8	18.74	9.19	1.03	1.4e-07
1700001L05Rik	13.11	6.49	1.03	2.8e-06
1700037H04Rik	180.86	89.1	1.03	3.0e-13
Ak5	142.96	70.1	1.03	7.8e-20
Lgr6	5.88	2.93	1.03	1.2e-03
Dapk1	222.06	109.15	1.03	5.6e-24
Pam	694.53	338.31	1.03	9.8e-25
Podxl	12.72	6.22	1.03	4.8e-06
Kcns2	42.93	21.05	1.03	8.7e-14
Bex2	377.8	185.41	1.03	1.6e-25
Mrps11	22.9	11.36	1.03	2.2e-07
Slc17a6	457.18	223.33	1.03	1.3e-24
Npnt	26.29	12.81	1.03	2.9e-09
Lor	15.63	7.69	1.02	4.7e-07
Camk2a	954.1	469.82	1.02	1.2e-24
Crhr2	6.84	3.37	1.02	2.1e-03
Smarcd3	84.22	41.61	1.02	1.5e-10
Bex4	11.97	5.9	1.02	6.3e-06
Lrrc27	19.52	9.58	1.02	1.1e-07
Gm17244	3.93	1.98	1.02	1.2e-02
Hilpda	6.33	3.13	1.02	6.9e-04
Cnr1	282.95	139.13	1.02	3.3e-22
Lrp3	143.96	70.84	1.02	6.1e-15
Klf10	18.36	9.03	1.02	3.3e-07
Med16	77.25	38.37	1.02	5.1e-12
Crocc2	2.8	1.37	1.02	3.1e-02
Ier5	19.02	9.4	1.02	1.6e-06
Cacnb3	194.04	96.47	1.02	6.8e-15
Ass1	55.45	27.62	1.02	4.1e-13
2210008F06Rik	2.77	1.37	1.02	3.1e-02
Dohh	25.86	12.99	1.02	3.5e-06
Wdr6	1386.02	692.89	1.01	6.8e-18
Ddx54	47.23	23.49	1.01	1.6e-11
Rhpn1	9.84	4.91	1.01	1.9e-04
Rbfa	32.06	16.09	1.01	6.8e-08
Chga	189.4	93.22	1.01	6.7e-18
Adcy5	400.18	198.68	1.01	1.7e-20
Sorcs3	90.5	44.73	1.01	5.1e-18
Lmo4	70.34	34.93	1.01	4.2e-15
Stim1	183.26	90.83	1.01	3.3e-21
4930553P18Rik	3.84	1.91	1.01	1.2e-02
Myo5b	36.27	18.44	1.01	4.6e-07
Tnfaip8l1	5.41	2.68	1.01	1.9e-03
Epor	2.46	1.23	1.01	4.1e-02
Fam19a1	33.99	16.96	1.01	1.2e-11
Large1	151.54	75.13	1.01	7.9e-20
Actn1	53.05	26.26	1.01	7.6e-14
Lrp8os2	8.58	4.31	1.01	2.0e-04
Thrb	135.26	67.36	1.01	1.3e-20
Tmem132d	66.27	32.87	1.01	2.1e-14
Lgr5	8.36	4.16	1.01	1.5e-04
Irf2bp1	134.2	67.81	1	7.6e-11
Kcnip1	155.06	77.34	1	2.3e-16
Rplp1	115.73	57.84	1	3.1e-12
Astn2	101.99	50.58	1	3.8e-18
Gpx3	257.84	128.39	1	2.0e-21
Nov	10.78	5.36	1	3.0e-05
Ankrd35	22.19	11.13	1	5.6e-08
Ubl4a	135.25	67.84	1	1.5e-17
2410002F23Rik	70.69	35.46	1	3.0e-14
Cacng8	42.87	21.51	1	4.1e-12
Slc1a6	33.83	16.79	1	1.3e-09
Adra2c	19.97	9.98	1	3.5e-07
Thop1	48.74	24.73	1	3.3e-11
Igsf8	177.31	88.62	1	1.6e-14
Wrnip1	127.29	63.97	1	2.4e-18
Agfg2	69.78	35.07	0.99	1.1e-11
Habp4	420.58	212.16	0.99	2.3e-20
Btbd19	13.8	6.97	0.99	2.8e-05
Ppp1r11	112.91	56.83	0.99	3.8e-15
Fbxo31	172.56	87.41	0.99	4.9e-15
Gng13	7.37	3.75	0.99	3.9e-03
Fcor	2.96	1.51	0.99	2.6e-02
Thy1	423.34	212.52	0.99	1.4e-23
Rassf6	2.66	1.34	0.99	3.9e-02
Arl6ip4	34.14	17.19	0.99	7.1e-09
Gm29514	2.96	1.52	0.99	3.0e-02
Map3k21	8.48	4.29	0.99	1.8e-04
Ndufa7	74.29	37.81	0.99	5.6e-10
Plk3	22.74	11.53	0.99	1.3e-07
Celf5	192.01	96.97	0.99	1.3e-16
Nrxn2	633.07	318.1	0.99	6.4e-18
Crmp1	346.05	175.74	0.99	2.9e-19
C2cd2l	146.66	74.09	0.98	1.2e-16
Ifrd2	5.97	2.98	0.98	2.8e-03
2010300C02Rik	75.57	38.38	0.98	5.5e-13
Gmip	24.96	12.6	0.98	2.4e-07
Ap2s1	192.61	97.69	0.98	1.4e-15
Bysl	40.49	20.61	0.98	1.4e-10
Sqstm1	931.9	475.3	0.98	8.5e-19
Tpbg	29.35	14.69	0.98	3.0e-09
AB041806	3.26	1.67	0.98	2.2e-02
Magel2	104.59	53.1	0.98	4.2e-15
1700086L19Rik	56.11	28.47	0.98	4.6e-14
Mef2d	353.4	179.96	0.98	2.0e-17
Arel1	144.76	73.52	0.98	4.3e-19
Fsd1	63.41	32.44	0.98	2.9e-10
Traip	16	8.13	0.98	4.1e-06
Bahd1	61.4	31.19	0.98	2.5e-10
Ubxn11	11.7	5.98	0.98	5.4e-05
Snx8	56.26	28.81	0.98	2.5e-09
Cdo1	59.23	30.12	0.98	1.1e-13
Sprn	72.71	36.9	0.97	5.3e-15
Fbxl16	567.01	290.37	0.97	2.7e-13
Cox14	70.92	36.37	0.97	9.0e-09
Dusp14	19.45	9.93	0.97	1.4e-07
Rps4l	22.98	11.81	0.97	3.8e-07
Ptms	283.17	145.56	0.97	1.2e-14
Pcsk1n	475.8	245.2	0.97	1.5e-02
Slc9b2	6.96	3.61	0.97	8.4e-04
Tlnrd1	60.22	31.09	0.97	8.7e-09
Wbp11	171.63	88.22	0.97	2.2e-18
Cdpf1	10.87	5.57	0.96	6.1e-05
Klc2	377.24	195.27	0.96	4.8e-13
Kcnq3	366.97	188.73	0.96	1.7e-19
Cyb561	138.63	70.58	0.96	4.2e-16
Tenm2	270.79	138.12	0.96	9.7e-21
Stk32c	156.93	80.97	0.96	3.7e-11
Cdkl4	24.6	12.6	0.96	9.0e-09
Chac1	16.33	8.37	0.96	3.7e-06
Dgkd	179.51	92.37	0.96	2.3e-19
Mif	32.17	16.8	0.96	8.9e-08
Camta2	284.18	146.08	0.96	1.4e-14
Eif2b5	115.63	59.61	0.96	2.8e-16
Snrpb	78.23	40.48	0.96	2.2e-12
Tada3	40.66	20.96	0.96	4.0e-10
Dpf1	37.19	19.22	0.96	7.1e-09
Tubb5	1177.61	608.74	0.96	1.5e-15
Dclk3	47.71	24.62	0.96	7.2e-11
D430019H16Rik	521.09	269.18	0.96	9.6e-18
Cx3cl1	280.03	143.18	0.96	1.2e-17
Mfsd13a	25.72	13.21	0.95	1.6e-07
Kcnmb4	7.47	3.86	0.95	5.7e-04
Prkce	637.48	329.7	0.95	5.8e-22
Ethe1	18.91	9.87	0.95	3.3e-05
Klhl2	140.92	72.98	0.95	9.0e-18
Ptprr	31.28	16.04	0.95	7.2e-09
Hic1	3.31	1.74	0.95	3.0e-02
Arhgdig	118.63	61.87	0.95	1.1e-12
Tdrp	55.96	29.03	0.95	3.0e-13
Usf1	66.43	34.69	0.95	2.0e-11
Snrpd2	28.7	15.01	0.95	2.8e-08
Fam216a	38.53	19.95	0.95	5.0e-11
Napepld	50.07	26.08	0.95	3.4e-10
Hmgb3	5.78	3	0.95	3.0e-03
Dnal4	53.45	28.03	0.95	9.6e-11
Zfp428	26.06	13.55	0.95	5.4e-07
Actn2	9.95	5.2	0.94	3.5e-04
Irf2bpl	152.56	79.75	0.94	9.1e-09
Stub1	78.56	41.36	0.94	5.3e-10
Pet100	10.83	5.65	0.94	5.2e-04
Lrrc4	75.47	39.31	0.94	4.5e-15
Ccdc137	39.11	20.42	0.94	1.2e-10
Hebp1	27.42	14.29	0.94	1.3e-08
Slc37a1	9.73	5.06	0.94	1.5e-04
Hmcn2	11.25	5.86	0.94	5.0e-05
Gm9866	102.75	53.62	0.94	7.0e-15
Gm14004	4.74	2.48	0.94	8.4e-03
Cotl1	92.55	48.4	0.94	5.2e-14
Ydjc	24.47	13.11	0.94	4.3e-06
Cacna2d1	485.48	254.58	0.94	1.2e-18
Tceal9	146.13	76.35	0.94	9.4e-15
Znhit1	32.53	17.08	0.94	3.6e-09
Prelid3a	56.08	29.38	0.94	3.7e-10
Cd3eap	21.43	11.42	0.93	1.6e-06
Tmem237	31.16	16.31	0.93	9.5e-10
Cmss1	11.78	6.13	0.93	4.3e-05
Gm37711	5.61	2.9	0.93	5.9e-03
ENSMUSG00000102215	3.16	1.68	0.93	4.3e-02
C1qtnf4	45.61	24	0.93	1.9e-06
Gm6472	18.2	9.76	0.93	2.2e-05
Slc2a6	16.87	8.78	0.93	9.0e-06
Gm28800	4.15	2.16	0.93	1.7e-02
Eno3	7.09	3.73	0.93	4.4e-03
Nr2f6	21.58	11.46	0.93	4.7e-05
Cdc42bpb	328.97	173.04	0.93	2.4e-18
Zcchc12	844.33	446.12	0.93	3.8e-19
Igfbp3	25.68	13.51	0.93	1.2e-08
Tnip1	44.47	23.64	0.93	1.8e-08
Slc26a11	12.73	6.65	0.93	3.3e-05
Tubb2a	540.94	286.84	0.93	4.2e-16
Ppdpf	22.42	11.86	0.93	1.5e-06
Vax1	10.83	5.67	0.93	2.5e-04
Map3k19	22.25	11.7	0.93	3.9e-07
Ccdc6	275.76	145.43	0.93	6.7e-20
Enkd1	7.22	3.81	0.92	9.8e-04
Dctpp1	4.26	2.23	0.92	1.3e-02
Galnt14	17.83	9.38	0.92	9.4e-07
Uqcr11	32.63	17.28	0.92	9.7e-07
Gm11814	2.97	1.57	0.92	4.0e-02
Banf1	42.21	22.47	0.92	1.7e-09
Slc25a42	50.3	26.5	0.92	1.5e-08
Gaa	1279.59	667.08	0.92	2.8e-16
Eps8	122.03	64.44	0.92	8.5e-17
Adgrb2	267.52	141.28	0.92	3.4e-14
Zcchc18	951.4	504.18	0.92	3.4e-19
Kcnv1	16.06	8.48	0.92	2.5e-06
Tmem109	33.8	17.84	0.92	5.8e-10
Hrk	66.91	35.38	0.92	1.4e-13
Itpa	22.57	11.96	0.92	1.4e-07
Adam11	116.42	61.43	0.92	1.0e-11
Dtx1	205.22	109.05	0.92	3.4e-13
Mypop	37.21	19.73	0.92	7.2e-09
Nme1	99.54	52.62	0.92	5.6e-13
Fam171a2	57.01	30.21	0.92	8.7e-09
Mtch1	871.06	465.9	0.92	1.2e-12
Arf3	1655.91	881.61	0.91	1.2e-16
Raly	129.16	68.73	0.91	4.2e-13
Med9	71.3	38.15	0.91	3.9e-10
Bhlhe41	102.61	54.59	0.91	1.0e-15
Wdr83os	8.38	4.46	0.91	6.5e-04
Tprgl	291.45	155.03	0.91	3.9e-14
Ldha	200.56	107.3	0.91	2.0e-15
Dtd2	29.85	15.87	0.91	4.4e-09
Gm20163	3.01	1.6	0.91	3.8e-02
Dctn3	85.13	45.74	0.91	2.3e-11
Zfp341	10.3	5.48	0.91	1.6e-04
Rangap1	520.59	278.23	0.91	2.1e-15
Ngef	166.05	88.7	0.91	1.2e-13
Ociad2	61.58	32.78	0.91	4.3e-13
Smpd3	56.82	30.33	0.91	2.1e-11
Prdx5	168.95	90.4	0.91	8.2e-13
Tmem91	34.18	18.27	0.91	1.2e-08
Htra2	22.05	11.76	0.91	4.5e-07
Rtl8c	152.97	81.77	0.91	5.6e-13
Rab40c	50.59	26.83	0.91	7.4e-08
Pcdhgb2	6.45	3.4	0.91	3.5e-03
Glra3	109.26	58.47	0.91	2.1e-09
Gpr137	92.13	49.25	0.91	2.4e-11
Unc119	73.48	39.67	0.91	1.8e-08
Eif5a	224.44	120.43	0.91	2.1e-15
Chmp6	25.58	13.7	0.9	2.2e-07
Slit1	238.96	126.82	0.9	1.3e-16
Rgs11	4.83	2.57	0.9	1.4e-02
Rnd3	92.49	49.56	0.9	3.6e-15
Cdk5r1	378.35	203.57	0.9	3.2e-15
Tbc1d2b	59.04	31.71	0.9	3.9e-12
Bambi	6.75	3.59	0.9	3.0e-03
Pithd1	235.62	126.94	0.9	6.9e-12
Hexdc	26.54	14.32	0.9	5.8e-07
Cers1	40.53	21.74	0.9	6.9e-09
Megf11	79.2	42.62	0.9	4.4e-14
Kctd10	59.14	31.98	0.9	7.6e-10
A430005L14Rik	22.31	12.11	0.9	4.6e-05
Plekhg5	51.59	27.88	0.9	4.8e-08
Snph	362.15	194.88	0.9	3.2e-14
Twf2	36.98	20.03	0.9	3.4e-07
Tmem43	47.86	25.53	0.89	2.1e-10
Susd4	234.46	125.68	0.89	5.8e-14
Emc10	126.32	67.95	0.89	5.1e-12
Riox1	16.55	9.04	0.89	8.6e-05
Plxna1	253.8	136.34	0.89	1.2e-14
Fam76a	115.3	62.27	0.89	1.3e-14
Mlf2	442.01	240.59	0.89	2.5e-12
Nbdy	53.26	28.78	0.89	2.8e-11
Snca	114.66	62.54	0.89	3.9e-12
Cbx8	20.87	11.39	0.89	5.6e-06
Becn1	119.46	64.54	0.89	6.8e-13
Oxld1	8.29	4.48	0.89	1.3e-03
Slc35e4	33.23	18	0.89	4.4e-08
Eno2	1675.88	912.53	0.89	1.9e-15
Gm15487	11.56	6.2	0.89	1.1e-04
Klhdc8b	73.04	39.57	0.89	9.9e-10
1500009C09Rik	171.33	92.97	0.88	8.8e-11
Mettl26	51.7	28.13	0.88	1.2e-07
Zbtb17	29.93	16.32	0.88	2.8e-06
Igsf9	9.35	5.06	0.88	9.1e-04
Snrpn	756.09	409.67	0.88	2.2e-19
Hspbp1	120.94	66.3	0.88	2.5e-08
B3galt4	4.81	2.61	0.88	2.0e-02
Nos1ap	95.88	52.17	0.88	8.3e-12
Lmna	49.36	27.19	0.88	3.5e-07
Tmem145	44	23.82	0.88	1.7e-10
Car11	32.16	17.45	0.88	8.8e-09
Egln2	103.57	56.68	0.88	9.4e-09
Dhcr24	149.79	80.51	0.88	2.1e-12
Hmbs	13.09	7.12	0.88	5.8e-05
Maged1	1615.55	882.84	0.88	1.8e-16
Slc7a4	47.43	25.64	0.88	1.1e-09
Ppfia4	255.59	139.88	0.88	1.1e-11
Tspan17	31.98	17.37	0.88	1.7e-07
Adamts18	7.72	4.22	0.88	1.6e-03
Sema4a	84.17	45.51	0.88	2.1e-12
Bex3	214.93	116.92	0.88	9.7e-17
Rhof	83.15	45.22	0.88	1.5e-09
Lck	4.63	2.54	0.88	1.4e-02
Chchd4	83.01	45.44	0.88	5.8e-11
Ssna1	30.64	16.96	0.88	2.7e-06
Myrip	132.26	72.14	0.88	4.3e-13
Scn1b	176.06	96.3	0.87	6.8e-14
Atp6v0e2	385.44	210.25	0.87	3.1e-17
Atox1	36.5	20.07	0.87	4.3e-07
Vps37d	31.03	16.97	0.87	4.5e-06
Bok	30.83	17	0.87	3.2e-07
Imp3	31.02	17	0.87	1.5e-08
Lmnb2	42.85	23.87	0.87	1.6e-07
Cnih2	117.97	64.73	0.87	1.6e-08
Wdr31	19.62	10.69	0.87	2.4e-06
Tro	511.91	280.13	0.87	9.7e-19
Drc1	29.13	15.83	0.87	9.3e-07
Mrpl14	24.57	13.46	0.87	2.2e-05
Phactr1	351.96	192.69	0.87	5.6e-19
Cpne6	141.05	78.18	0.87	4.0e-12
4930539E08Rik	26.56	14.66	0.87	2.2e-07
Cadm3	469.5	255.79	0.87	5.7e-17
Preb	90.07	49.52	0.87	2.7e-11
Map7d1	348.3	192.33	0.87	1.0e-11
Gadd45g	9.08	5.04	0.87	7.5e-04
Dpp10	237.4	129.53	0.87	5.5e-13
Evpl	31.7	17.43	0.87	1.2e-06
Efnb3	205.72	112.62	0.87	5.7e-14
Whrn	85.51	46.83	0.87	1.1e-09
Lpcat4	40.54	22.11	0.87	3.3e-08
6030419C18Rik	141.88	78.66	0.87	8.1e-10
Npy2r	30.72	16.88	0.87	3.6e-07
Psd	250.8	138.68	0.86	1.1e-09
Dlg3	228.91	126.21	0.86	1.4e-16
Rab1b	226.47	125.03	0.86	5.9e-11
Nim1k	32.92	18.11	0.86	2.1e-08
Ltbp4	41.32	22.62	0.86	7.9e-08
Dynll1	158.6	87.22	0.86	2.0e-13
Arhgdia	571.74	316.87	0.86	1.7e-11
Mospd3	21.57	11.91	0.86	4.8e-06
Snx15	38.7	21.24	0.86	3.4e-07
Tsen54	8.29	4.59	0.86	1.9e-03
Ppfia3	192.92	106.78	0.86	7.0e-10
Tmem191c	38.2	21.11	0.86	1.2e-06
Rbm43	55.03	30.45	0.86	2.0e-10
Rnf19b	84.6	47	0.86	3.1e-10
Rbck1	135.54	74.76	0.86	3.8e-10
Kcnk2	100.34	55.21	0.86	3.9e-13
Bri3	16.64	9.26	0.86	8.3e-04
Prkcz	189.22	104.66	0.86	8.9e-12
Tmem160	17.22	9.61	0.86	2.2e-04
Pcdhgb5	6.21	3.58	0.86	8.9e-03
Nip7	30.03	16.53	0.86	5.9e-08
Nme5	10.63	5.86	0.86	3.9e-04
Khdrbs2	25.32	14.01	0.86	2.8e-07
Mrm2	17.61	9.76	0.86	6.8e-06
Gpr173	39.48	21.76	0.86	2.4e-09
Aip	119.49	66.52	0.86	5.0e-12
Dhodh	28.32	15.75	0.86	3.4e-06
Efcab10	4.91	2.62	0.86	2.7e-02
Jakmip1	122.44	67.68	0.86	2.7e-14
Nfil3	17.76	9.91	0.86	4.7e-05
Tnxb	5.25	2.89	0.86	1.0e-02
Pin1	90.37	50.41	0.85	1.4e-09
Lzts3	222.28	123.93	0.85	7.4e-10
Phf13	51.35	28.51	0.85	1.1e-08
Cdip1	618.76	344	0.85	7.5e-16
1110004E09Rik	19.92	11.05	0.85	2.3e-06
Kifc3	61.16	33.94	0.85	1.6e-09
Pcdhga3	8.09	4.46	0.85	2.4e-03
Yjefn3	4.99	2.81	0.85	2.0e-02
U2af1	8	4.45	0.85	2.1e-03
Grin1	199.43	109.79	0.85	5.0e-13
Chrna4	80.09	44.07	0.85	6.3e-12
Stoml1	60.95	33.73	0.85	5.5e-11
Mapre3	303.85	169.02	0.85	7.7e-14
Mtpn	549.33	304.84	0.85	1.8e-17
Trpc7	16.66	9.26	0.85	1.1e-05
1700003E16Rik	34.79	19.33	0.85	1.0e-05
Rxrb	92.7	51.62	0.85	1.6e-08
Zfp628	25.21	14.12	0.85	1.2e-05
Rrp12	86.14	48.01	0.85	1.9e-11
Hn1	94.89	53.02	0.85	3.2e-09
Kctd17	91.02	50.87	0.85	1.2e-08
Arxes1	21.72	12.09	0.85	1.4e-05
Tagln3	251.09	140.19	0.85	1.2e-15
Khnyn	64.96	36.22	0.85	5.5e-10
Exoc3l	9.06	5.07	0.85	1.6e-03
Syn2	1049.71	585.69	0.84	2.3e-15
Armc7	14.31	7.98	0.84	4.1e-04
Caly	181.95	101.09	0.84	6.5e-12
Nsg2	728.2	405.74	0.84	9.6e-18
Gnaz	222.81	125.27	0.84	1.2e-12
Tmem14a	17.57	9.72	0.84	1.5e-05
Actl6b	65.13	36.42	0.84	2.4e-09
Mrpl12	42.54	24	0.84	1.1e-06
Reep2	107.58	59.67	0.84	2.4e-11
Fbxl6	15.54	8.63	0.84	1.4e-04
Cbx4	64.26	36.05	0.84	6.9e-10
Tmem101	16.58	9.15	0.84	2.4e-05
Crlf2	7.42	4.14	0.84	2.7e-03
Arl6ip5	104.98	58.17	0.84	1.1e-11
Kif3c	449.67	252.35	0.84	5.5e-13
Rnps1	46.42	26.18	0.84	5.1e-08
Chpf	94.99	53.11	0.84	3.7e-11
Ier5l	10.62	5.91	0.84	4.4e-03
Ccsap	20.18	11.28	0.84	2.7e-06
Ccdc106	14.83	8.3	0.84	7.0e-05
Nucb1	107.91	59.87	0.84	4.4e-12
Baiap3	1004.98	565.32	0.84	1.9e-11
Ube2l6	5.47	3.05	0.84	1.2e-02
Scamp3	27.36	15.28	0.84	2.6e-07
Zscan25	20.8	11.77	0.84	1.6e-05
Rrp9	17.17	9.7	0.84	4.9e-05
Lamp5	10.75	6.02	0.84	3.1e-04
Stxbp2	5.99	3.34	0.84	7.7e-03
Paqr9	88.66	49.51	0.84	3.7e-11
Rab15	270.55	152.16	0.84	1.8e-12
Mrpl13	57.07	31.91	0.84	1.1e-09
Aamp	190.44	107.16	0.84	7.9e-12
Sez6l	391.25	217.89	0.84	8.6e-17
Ppan	10.57	5.94	0.83	4.0e-04
Nt5c	34.05	19.32	0.83	1.5e-06
Gm37696	3.64	1.98	0.83	4.2e-02
Rbm24	33.1	18.6	0.83	2.5e-08
Tunar	127.38	71.92	0.83	3.6e-11
Cyth2	58.67	33.18	0.83	1.6e-08
Hras	123.46	69.78	0.83	2.8e-10
Pex6	93.56	52.86	0.83	6.8e-09
Borcs8	20.99	11.84	0.83	6.0e-06
Esr1	52.67	29.5	0.83	1.6e-09
Mafk	24.16	13.6	0.83	9.7e-07
Ar	196.2	110.3	0.83	5.2e-16
Rabl6	227.85	128.57	0.83	1.1e-09
Tuba4a	503.99	284.17	0.83	1.2e-12
Carmil3	68.15	38.13	0.83	1.1e-07
Ifngr2	53.98	30.32	0.83	1.5e-09
Iqgap2	15.88	9.01	0.83	5.3e-05
Enox1	49.27	27.77	0.83	9.4e-10
Trim37	760.53	428.46	0.83	2.3e-17
Rpp25	11.38	6.4	0.83	3.3e-04
Gm14597	5.49	3.07	0.83	1.2e-02
Ing2	29.83	16.82	0.83	8.3e-08
AC108416.1	5.19	2.92	0.83	1.3e-02
Plekhj1	24.53	13.89	0.83	1.4e-06
Dact2	47.03	26.68	0.83	1.3e-06
Dmtn	467.85	264.95	0.83	5.2e-10
Cmip	573.3	325.13	0.83	7.8e-12
Pop1	7.42	4.2	0.83	3.3e-03
Gpr135	26.11	14.74	0.83	3.4e-07
Dnaic2	5.87	3.3	0.83	9.3e-03
Ube2g2	45.91	26.05	0.83	4.3e-07
Qsox2	36.81	20.63	0.82	5.3e-08
Dgcr2	157.31	88.09	0.82	1.3e-11
Dkk3	85.27	47.92	0.82	9.5e-12
Pkmyt1	3.48	2	0.82	4.5e-02
Exosc2	28.68	16.23	0.82	1.8e-07
Cib2	71.79	40.64	0.82	1.2e-08
Junb	28.22	16.2	0.82	1.9e-05
Pmvk	40.76	23.09	0.82	1.7e-08
Klhl23	104.97	59.32	0.82	5.0e-13
Prnp	582.1	328.06	0.82	2.7e-15
Entpd3	23.77	13.32	0.82	2.0e-06
Mast3	226.02	128.39	0.82	9.3e-09
Arpc5	106.38	60.26	0.82	6.0e-13
Higd2a	64.52	36.81	0.82	2.8e-08
Rab3a	778.87	443.72	0.82	2.7e-13
Prkar1b	1330.32	756.68	0.82	4.3e-13
Camsap2	584.09	330.66	0.82	9.3e-18
Mea1	65.15	37.34	0.82	5.6e-08
Timm22	62.56	35.55	0.82	2.9e-09
Gga3	131.06	74.19	0.82	6.0e-11
Bag1	123.34	69.9	0.82	1.8e-12
Htr2a	45.86	25.79	0.82	5.2e-09
Il13ra1	20	11.44	0.82	1.2e-05
Xkr8	15.71	8.84	0.82	7.8e-05
Gm9825	5.32	3	0.82	1.5e-02
Slc22a3	5.38	3.03	0.82	1.5e-02
Akr7a5	33.63	19.1	0.82	5.8e-06
Tmem8b	134.11	75.99	0.82	3.1e-12
Prcc	86.24	48.99	0.82	5.8e-09
Ccne1	12.82	7.3	0.82	5.2e-04
Agap3	346.67	197.82	0.82	2.2e-10
Prrt1	49.88	28.21	0.82	8.4e-09
Tigd3	8.1	4.58	0.82	2.8e-03
Ephx4	4.01	2.25	0.82	3.1e-02
Epn1	362.06	207.04	0.82	4.5e-08
Akt1	291.03	165.89	0.82	2.6e-10
2810410L24Rik	5.95	3.42	0.82	2.3e-02
Ccdc151	7.09	4.05	0.82	4.0e-03
Pebp1	97.91	55.86	0.82	6.2e-11
Cops7a	158.07	90.27	0.82	1.3e-10
Npdc1	154.84	87.59	0.82	4.7e-11
Atp9a	555.14	313.96	0.82	7.0e-13
Jakmip2	112.49	63.99	0.81	2.2e-13
Tpra1	32.08	18.21	0.81	3.4e-07
Mpnd	97.51	55.81	0.81	9.1e-09
Snrpa	31.36	17.89	0.81	1.2e-07
Arhgap1	102.22	58.36	0.81	3.9e-12
Uck1	28.34	16.26	0.81	7.9e-06
Tmem120a	11.18	6.33	0.81	4.8e-04
Tef	666.51	380.58	0.81	2.7e-11
Pdrg1	46.98	26.71	0.81	4.8e-09
Ypel3	152.43	87.51	0.81	2.0e-07
Zmynd10	5.61	3.22	0.81	1.3e-02
Limd2	39.93	22.81	0.81	8.4e-08
Myt1l	427.35	243.51	0.81	6.3e-16
Klhl26	108.96	62.16	0.81	5.1e-08
1110065P20Rik	12.79	7.67	0.81	6.8e-03
Ripor2	102.42	58.35	0.81	6.3e-13
Zrsr1	143.06	81.48	0.81	3.0e-14
Mgst3	35.52	20.3	0.81	1.1e-05
Pwwp2b	18.24	10.45	0.81	1.0e-04
Rnf157	530.77	303.32	0.81	1.1e-12
Rnf5	26.59	15.27	0.81	6.7e-05
Sdhaf4	21.91	12.47	0.81	6.9e-06
Slc25a29	16.57	9.54	0.81	5.4e-04
Pnma3	105.73	60.56	0.81	1.6e-11
Arf1	225.85	129.33	0.81	1.9e-14
Tuba1b	103.92	59.54	0.81	8.5e-11
Dcaf12l2	6.35	3.61	0.81	8.9e-03
Acd	37.99	21.82	0.81	1.1e-07
Cecr6	17.69	10.09	0.81	2.2e-05
Timm10	23.6	13.5	0.81	3.5e-06
Dlg4	1027.71	591.44	0.81	4.4e-11
Gpr12	21.82	12.45	0.81	3.9e-06
Ndn	1459.29	838.1	0.81	8.6e-16
Cptp	55.91	31.88	0.81	2.1e-08
Zfp513	17.72	10.21	0.81	3.5e-04
H2afx	20.29	11.61	0.81	7.3e-06
C2cd4c	59.9	34.57	0.81	1.7e-07
Taf11	51.51	29.57	0.81	1.1e-08
Ipo13	113.09	64.81	0.81	2.5e-08
Cdkn2d	72.51	41.86	0.8	1.4e-07
Bloc1s4	10.55	6.13	0.8	2.1e-03
Gsk3a	203.26	117.79	0.8	1.0e-09
Lsm10	9.59	5.57	0.8	5.2e-03
Slc22a17	658.19	375.31	0.8	2.3e-11
Ntmt1	28.22	16.4	0.8	7.1e-06
Zfp365	379.78	218.5	0.8	6.9e-15
Fam69b	38.87	22.36	0.8	1.7e-07
Lrfn4	31.33	17.9	0.8	1.8e-05
L3mbtl2	59.56	34.48	0.8	1.8e-07
Resp18	299.77	170.75	0.8	1.5e-11
Fam126a	49.84	28.63	0.8	7.9e-09
Prrc2b	1324.76	763.48	0.8	1.4e-16
Eef1akmt1	18.67	10.76	0.8	4.0e-05
2900026A02Rik	91.25	52.57	0.8	3.0e-10
Wdr73	42.07	24.24	0.8	1.9e-07
Tsen34	50.84	29.83	0.8	5.2e-06
Ahdc1	186.11	107.41	0.8	1.4e-09
Chchd6	64.22	36.95	0.8	9.9e-08
Ntpcr	27.12	15.64	0.8	4.5e-06
Abhd17a	74.22	43.03	0.8	3.2e-07
B4galnt1	40.43	23.28	0.8	3.6e-07
Pcdhga6	12.55	7.27	0.8	2.5e-04
Atp6v1f	70.78	40.89	0.8	8.4e-08
Gm16286	147.46	85.17	0.8	7.2e-10
Faah	33.05	19	0.8	1.6e-07
Mien1	25.76	14.86	0.8	1.2e-05
Pnma2	234.24	135.21	0.8	1.9e-14
Ttc39c	45.29	26.07	0.8	7.7e-09
Vps9d1	44.1	25.5	0.8	5.7e-07
Fem1a	98.39	56.8	0.8	6.3e-11
Lrrc14	47.79	27.56	0.8	5.4e-08
Ogfod1	672.23	387.39	0.8	1.3e-14
Spats1	5.1	2.92	0.8	1.8e-02
Rnf126	41.07	23.76	0.8	2.0e-05
Flot1	114.48	66.46	0.79	8.1e-10
BC037034	90.19	52.23	0.79	1.5e-09
Lrp11	161.7	92.6	0.79	5.4e-12
Sigmar1	29.69	17.08	0.79	8.2e-07
Rps19bp1	15.31	8.78	0.79	5.2e-04
Mapk14	134.34	77.53	0.79	4.3e-12
Sphk2	51.03	29.62	0.79	5.1e-07
Rph3al	10.51	5.94	0.79	5.0e-03
Psenen	3.72	2.14	0.79	4.5e-02
Timm17b	29.41	16.98	0.79	1.3e-05
Ctnna2	246.81	142.55	0.79	1.1e-14
Arhgap19	7.85	4.53	0.79	3.2e-03
Nyap1	209.4	122.14	0.79	1.2e-09
Ccdc124	41.01	23.7	0.79	5.3e-06
Cry1	40.89	23.65	0.79	1.6e-08
Chmp1a	109.4	63.91	0.79	4.9e-07
Rbmxl1	10.63	6.19	0.79	1.1e-03
Rragd	255.39	147.78	0.79	1.0e-14
Ehbp1l1	44.77	25.97	0.79	2.4e-06
Nop9	17.36	10.03	0.79	7.2e-05
Kl	16.05	9.27	0.79	1.3e-04
Mrpl4	36.91	21.56	0.79	3.8e-05
Pcdhga11	6.34	3.58	0.79	1.3e-02
Myo1b	24.51	14.23	0.79	7.4e-06
Kcnk13	17.21	9.85	0.79	2.2e-04
Dbpht2	203.27	117.51	0.79	3.9e-14
Lin37	17.67	10.25	0.79	5.7e-05
Kif17	32.53	19.02	0.79	1.5e-06
Lrfn2	35.52	20.49	0.79	1.6e-06
Ssr2	42.3	24.31	0.79	2.0e-07
Cap2	174.98	101.35	0.79	3.3e-14
Nrbf2	10.49	6.08	0.79	1.1e-03
Chn1	369.12	214.1	0.79	8.6e-15
Fbxw5	106.25	61.45	0.79	4.5e-09
Atp5d	179.83	104.75	0.79	1.6e-08
Mfsd12	26.18	15.23	0.79	2.4e-06
Rpp21	12.35	7.3	0.79	1.9e-03
Txn1	74.06	42.96	0.79	8.7e-10
Gm2694	6.24	3.63	0.79	1.0e-02
Lrrc3	24.21	14.01	0.79	5.7e-06
Slitrk5	106.8	61.7	0.79	6.2e-12
Ndufaf3	42.83	24.91	0.79	2.0e-07
Plppr3	88.39	51.05	0.79	1.6e-09
Gng7	78.4	45.52	0.79	1.5e-09
Pygo2	85.77	49.94	0.79	2.4e-09
Rnft2	108.55	62.57	0.79	2.2e-10
Srp14	104.19	60.67	0.79	3.6e-10
Tor2a	12.82	7.41	0.79	2.8e-04
Fbxl15	13.58	8.09	0.79	4.9e-03
Rapgefl1	144.32	84.12	0.79	5.5e-09
Ten1	22.11	12.91	0.78	8.8e-05
Plvap	19.56	11.27	0.78	9.5e-05
Dad1	43.19	25.09	0.78	1.2e-08
Cyld	477.9	277.62	0.78	8.5e-16
Hs3st2	6.56	3.82	0.78	8.5e-03
Lcorl	115.23	67.12	0.78	1.9e-11
Pitpnm3	143.51	83.69	0.78	7.1e-12
Cenpt	13.59	7.9	0.78	4.8e-04
1700030J22Rik	20.38	11.83	0.78	1.6e-05
Mib2	149.84	87.99	0.78	3.7e-08
Cacna1h	75.44	43.83	0.78	2.1e-09
Zfr2	85.37	49.65	0.78	3.5e-06
Gm2415	16.87	9.86	0.78	1.3e-04
Atg9b	30.13	17.49	0.78	3.2e-06
Kcnj3	66.91	38.94	0.78	2.8e-08
Vps72	34.79	20.44	0.78	1.7e-06
Rab3ip	48.78	28.43	0.78	3.6e-07
Trir	58.77	34.43	0.78	5.8e-09
Dtwd1	11.04	6.44	0.78	7.1e-04
Deup1	7.48	4.37	0.78	4.6e-03
Lhfpl4	260.59	152.05	0.78	3.7e-12
Tmem14c	26.94	15.71	0.78	2.0e-06
Sept5	366.47	214.18	0.78	2.4e-10
Sirpa	302.44	175.18	0.78	1.8e-13
Adar	427.04	249.69	0.78	5.8e-14
B630019K06Rik	284.19	165.83	0.78	1.0e-13
Dnajc30	19.23	11.25	0.78	5.0e-05
Vcpkmt	7.73	4.52	0.78	4.3e-03
Tctn2	34.52	20.03	0.78	2.0e-06
Rnf166	31.05	18.19	0.78	2.0e-06
Sumo3	175.48	102.79	0.78	7.2e-11
Sema5a	252.79	148.68	0.78	2.0e-11
Bud23	22.89	13.41	0.78	3.6e-05
Lin7b	21.94	13	0.78	4.0e-04
Pqlc1	22.98	13.39	0.78	9.3e-05
Mrps17	68.56	40.09	0.77	2.9e-09
Stmn3	600.65	352.85	0.77	1.1e-09
Rpl31	3.86	2.27	0.77	4.4e-02
Tmem231	26.27	15.35	0.77	6.9e-06
Cdc42ep3	15.77	9.28	0.77	1.9e-04
Arf6	66.25	39	0.77	1.7e-08
Mrpl34	19.16	11.34	0.77	6.5e-04
Rnf187	441.77	260.78	0.77	2.4e-09
Coro2a	91.76	53.82	0.77	3.7e-10
Pop7	21.15	12.44	0.77	3.2e-05
Zc3h10	22.35	13.2	0.77	1.1e-04
Rnf6	99.58	58.23	0.77	1.3e-10
Rce1	10.9	6.31	0.77	1.9e-03
Snip1	25.16	14.75	0.77	1.6e-05
P4htm	62.48	36.43	0.77	7.5e-09
Uqcrq	77.74	45.66	0.77	6.7e-08
Psmg3	8.13	4.78	0.77	4.9e-03
Rnf113a1	10.09	5.9	0.77	1.4e-03
Lipt2	4.94	2.91	0.77	2.4e-02
Smyd5	69.32	40.82	0.77	1.5e-08
Rcan1	110.24	64.9	0.77	1.4e-08
Rasgef1a	248.52	145.98	0.77	7.8e-12
Pgrmc1	484.45	282.96	0.77	3.5e-11
Ptpn5	186.34	109.09	0.77	5.6e-11
Mnt	88.67	52.17	0.77	1.3e-08
Pdxp	136.05	80.53	0.77	1.2e-07
Mical2	139.09	81.54	0.77	4.8e-12
Cactin	33.85	19.89	0.77	1.3e-05
Prpf19	370.55	218.45	0.77	2.3e-12
Blcap	279.27	163.9	0.77	5.2e-12
Trim28	242.83	143.25	0.77	9.7e-12
Shh	6.66	3.91	0.77	8.7e-03
Adam15	43.05	25.09	0.77	1.3e-06
Lsm4	24.55	14.74	0.77	4.0e-04
Bod1	95.81	56.12	0.77	9.3e-10
Kifc2	220.72	130.52	0.77	2.8e-07
Elof1	67.62	39.8	0.77	9.8e-07
Wsb2	214.82	126.15	0.77	7.8e-09
B4gat1	97.05	56.74	0.77	6.4e-11
Cdipt	99.97	58.57	0.77	2.5e-10
Atp1a3	2683.91	1557.21	0.77	4.5e-11
B9d2	19.95	11.94	0.77	1.6e-04
Polr2e	36.8	21.76	0.77	2.6e-06
Trim62	61.8	36.6	0.77	2.8e-08
Tgfbr3	21.04	12.33	0.77	2.0e-05
Spryd3	297.85	176.5	0.77	1.8e-09
Lrrc24	15.18	8.84	0.77	8.3e-04
Zfp526	22.47	13.15	0.77	4.1e-05
Ino80b	11.36	6.77	0.77	1.5e-03
Ankrd13b	63.02	37.51	0.77	5.8e-07
Fkbp8	415.34	245.97	0.77	2.6e-07
Atg7	38.91	22.99	0.77	1.7e-07
Gm13446	5.5	3.26	0.76	1.9e-02
Otud5	166.32	98.14	0.76	1.1e-10
Wdr83	21.63	12.76	0.76	8.3e-05
Fam110b	69.72	41.23	0.76	6.7e-09
Samd1	19.46	11.66	0.76	1.2e-04
Zfp579	18.68	11.07	0.76	1.6e-03
Asphd1	21.49	12.63	0.76	5.7e-05
Pim2	63.06	37.41	0.76	1.2e-07
Brinp3	61.73	36.25	0.76	3.5e-09
Npy1r	17.66	10.28	0.76	1.6e-03
Stk19	16.71	9.88	0.76	8.1e-05
Hcrtr2	19.9	11.55	0.76	1.5e-04
Ccdc85b	32.94	19.69	0.76	6.0e-04
Ywhab	1464.72	863.56	0.76	9.5e-16
Mrpl41	47.39	27.97	0.76	5.9e-08
Uros	38.07	22.49	0.76	2.6e-06
Phf20	195.45	115.42	0.76	1.1e-12
Trim27	60.07	35.51	0.76	2.7e-08
Rexo1	59.53	35.6	0.76	8.5e-06
Myl12b	148.69	87.63	0.76	5.2e-10
Fkbpl	9.06	5.37	0.76	2.8e-03
Phf23	58.86	34.95	0.76	1.6e-07
Ndfip1	391.16	229.63	0.76	5.2e-11
Tmem256	26.74	15.79	0.76	1.3e-05
Abhd8	352.35	210.21	0.76	2.2e-02
Fbxo27	14.45	8.56	0.76	4.7e-04
AI837181	71.08	42.41	0.76	1.6e-07
Lins1	21.22	12.55	0.76	2.8e-05
Ptch2	4.95	2.92	0.76	3.2e-02
Smn1	18.52	10.88	0.76	7.3e-05
Sfta3-ps	21.49	12.78	0.76	2.3e-05
Khsrp	179.21	106.71	0.76	2.7e-10
Psap	1096.57	642.77	0.76	4.1e-14
Ncs1	922.86	547.54	0.76	7.4e-11
Zfp653	10.84	6.38	0.76	1.4e-03
Polr3gl	16.15	9.53	0.76	1.5e-04
Ssh3	13.36	8	0.76	1.2e-03
Larp1b	22.93	13.55	0.76	1.4e-05
Atpif1	55.08	32.55	0.76	1.3e-07
Ptprn	507.46	297.86	0.76	4.1e-11
Ndufb6	40.57	24.16	0.76	3.6e-07
Mvk	26.58	15.81	0.76	2.0e-04
Rps3a3	6.01	3.51	0.76	4.8e-02
Eid2b	56.01	33.29	0.75	1.8e-08
Pianp	159.69	94.25	0.75	7.2e-11
Dync1i1	232.19	138.15	0.75	1.4e-10
Wscd2	69.28	41.19	0.75	1.3e-08
Rgs19	30.54	18.04	0.75	4.9e-06
Arpc4	142.54	84.9	0.75	2.6e-09
Tfpt	16.91	10.08	0.75	1.1e-04
Ccdc120	19.13	11.37	0.75	1.4e-04
Ubn1	99.37	58.82	0.75	1.1e-09
Ndufa8	103.5	61.85	0.75	1.4e-08
Adcy3	72.94	43.06	0.75	6.8e-09
Akirin1	66.94	39.69	0.75	2.9e-09
Ndufs7	90.24	54.19	0.75	1.5e-06
Ubald1	57.46	34.11	0.75	1.1e-08
Mlx	26.48	15.73	0.75	1.1e-05
Ccdc30	20.55	12.16	0.75	1.4e-04
Fam220a	40.3	24	0.75	2.8e-07
Gpd1l	198.61	118.08	0.75	9.8e-12
Srd5a3	11.35	6.72	0.75	9.5e-04
Pafah1b3	55.23	32.86	0.75	2.1e-06
Pcdh1	160.48	94.88	0.75	2.2e-10
AW121686	5.82	3.45	0.75	1.8e-02
B230217O12Rik	12.44	7.34	0.75	1.5e-03
Zfpl1	17.25	10.34	0.75	2.0e-04
Pgbd5	115.18	68.68	0.75	5.3e-08
Mycl	38.27	22.87	0.75	8.6e-06
Sertm1	47.88	28.57	0.75	2.0e-07
Fam214b	73.19	43.78	0.75	1.2e-07
Fosl1	6.52	3.84	0.75	1.9e-02
Rab3d	9.36	5.57	0.75	4.1e-03
Rps3a1	45.55	27.05	0.75	4.7e-08
Brd9	63.69	37.9	0.75	1.2e-08
Abcc8	17.48	10.32	0.75	2.5e-04
Ppfia2	196.57	116.81	0.75	2.6e-12
5730409E04Rik	157.46	94.23	0.75	3.4e-10
Ypel1	13.38	7.97	0.75	4.3e-04
Tnc	6.66	3.95	0.75	1.2e-02
Pcdh8	45.08	26.81	0.75	4.7e-08
Tmem200a	24.19	14.33	0.75	1.5e-05
Adgrl1	453.95	269.33	0.75	1.7e-11
Leng9	9.85	5.91	0.75	2.6e-03
Col4a2	17.9	10.64	0.75	8.5e-05
Daxx	37.97	22.66	0.75	3.4e-06
Fam185a	39.38	23.45	0.75	3.5e-07
Nup98	115.9	69.1	0.75	2.8e-11
D430036J16Rik	5.34	3.19	0.75	2.1e-02
Mrps28	8.82	5.3	0.75	4.1e-03
Adgrf5	18.1	10.54	0.75	5.4e-04
Prim2	13.9	8.25	0.75	1.7e-03
Wdr34	55.14	33.34	0.75	1.8e-06
Gm47163	38.36	23.09	0.75	4.4e-06
Fbxo10	145.09	86.87	0.75	4.9e-11
Flywch1	711.05	428.43	0.75	2.1e-08
Creld1	58.63	34.61	0.75	6.8e-07
Cby1	35.25	21.22	0.74	2.9e-06
Snrnp25	8.77	5.24	0.74	3.4e-03
Gpr26	215.39	128.57	0.74	1.8e-12
Commd4	27.23	16.24	0.74	2.7e-05
Hp1bp3	484.53	289.83	0.74	1.1e-13
Dmwd	149.64	89.83	0.74	9.6e-09
Tmem250-ps	119.93	71.82	0.74	8.9e-08
Rplp2	46.55	27.93	0.74	6.5e-07
Elob	37.49	22.51	0.74	1.0e-05
Ppp1ca	200.84	120.21	0.74	2.2e-10
Smad3	40.46	24.17	0.74	4.5e-07
Spef1	8.23	4.92	0.74	5.3e-03
Gng3	179.35	107.24	0.74	2.1e-12
Hsf4	30.55	18.19	0.74	2.0e-04
Mrpl20	36.31	21.5	0.74	1.3e-06
Kcnq2	568.2	338.97	0.74	1.8e-12
Dner	305.85	181.64	0.74	3.9e-13
Pabpc4	11.77	7.07	0.74	1.4e-03
Pja1	469.33	281.14	0.74	4.2e-13
Selenom	75.7	45.37	0.74	9.3e-07
Plxna2	157.48	94.3	0.74	1.5e-11
Gm26833	8.9	5.37	0.74	4.3e-03
Maneal	55.54	33.09	0.74	1.1e-07
Syt9	80.33	48.15	0.74	5.3e-09
Aup1	24.45	14.6	0.74	3.9e-05
Zfp319	63.76	38.39	0.74	5.5e-07
Grwd1	28.53	17.15	0.74	4.3e-06
Znhit3	20.09	12.03	0.74	6.3e-05
Oaz1	26.03	15.51	0.74	1.9e-05
Edc3	64.33	38.6	0.74	5.0e-08
Chtf8	78.46	47.34	0.74	4.9e-07
Mfsd10	7.12	4.28	0.74	9.4e-03
Wars	167.98	101.16	0.74	1.6e-11
Grik5	194.78	116.83	0.74	1.4e-10
Arfip2	130.68	78.92	0.74	7.1e-09
Cbx6	554.1	334.4	0.74	1.8e-10
Borcs5	41.16	24.82	0.74	3.3e-06
Nectin3	55.39	33.51	0.74	9.1e-08
Nphp1	29.45	17.72	0.74	8.6e-06
Dok4	18.43	11.27	0.74	1.2e-03
Neurl1b	41.3	24.78	0.74	1.3e-06
Tusc2	97.28	58.55	0.73	5.4e-09
Letmd1	34.41	20.69	0.73	6.7e-07
Grk6	95.33	57.86	0.73	6.6e-08
Nova2	172.98	104.15	0.73	2.2e-10
Timm13	30.19	18.23	0.73	5.9e-06
Gpatch3	5.59	3.43	0.73	3.4e-02
Ift22	118.22	71.16	0.73	2.8e-09
Gtf2h1	63.53	38.21	0.73	3.4e-09
Edf1	33.56	20.35	0.73	9.3e-06
Bcr	340.86	205.29	0.73	4.2e-11
Paxx	28.59	17.37	0.73	2.6e-05
Orai2	52.21	31.52	0.73	9.5e-08
Pomk	38.91	23.39	0.73	4.4e-07
Noc2l	42.14	25.52	0.73	3.4e-07
Capns1	250.62	151.19	0.73	9.6e-13
Babam1	95.59	58.03	0.73	4.0e-08
Zcchc17	107.5	64.9	0.73	3.4e-10
Mrpl21	25.32	15.23	0.73	4.4e-05
B4galt3	18.85	11.3	0.73	1.7e-04
Cited2	52.75	31.67	0.73	1.1e-07
Gatd1	44.03	26.55	0.73	6.2e-06
Nop16	20.04	12.09	0.73	4.2e-05
Arfgap1	131.45	79.86	0.73	1.4e-09
Ccdc65	15.04	9.12	0.73	6.1e-04
Nt5dc3	255.78	154.21	0.73	7.7e-11
Spata33	13.28	8.05	0.73	8.2e-04
Cep131	18.03	10.9	0.73	1.0e-04
Ankrd46	360.88	218.37	0.73	1.2e-12
Adra1b	13.13	7.95	0.73	9.1e-04
Uqcc2	75.56	45.69	0.73	1.1e-05
Gm13205	9.78	5.96	0.73	4.1e-03
9130221H12Rik	4.61	2.8	0.73	4.3e-02
Cfl1	433.27	262.8	0.73	3.0e-12
Hsph1	621.06	375.18	0.73	4.8e-14
Atp6v1d	246.63	149.18	0.73	5.6e-13
Txndc5	77.42	46.35	0.73	1.3e-07
Txn2	114.84	69.48	0.73	5.2e-08
Fbxo9	221.15	134.5	0.73	6.4e-11
Tubb3	671.52	410.24	0.73	1.1e-07
Atp6v1g2	418.81	253.87	0.73	3.0e-13
Hcn1	104.64	63.54	0.72	2.2e-08
Abcf1	95.07	57.76	0.72	3.4e-08
Galk1	9.77	5.96	0.72	7.2e-03
Snn	225.68	136.69	0.72	4.0e-11
Larp7	16.81	10.19	0.72	1.6e-04
Mlycd	44.63	27.44	0.72	2.4e-05
Ankrd50	287.23	173.9	0.72	6.4e-12
Gas8	14.62	8.89	0.72	4.7e-04
Ahi1	2318.14	1403.93	0.72	5.5e-15
Noa1	28.95	17.55	0.72	3.8e-06
Kctd4	35.4	21.46	0.72	2.8e-06
Mettl1	22.31	13.6	0.72	1.0e-04
Khk	12.8	7.79	0.72	1.5e-03
Tnfrsf21	157.67	95.35	0.72	3.5e-11
Mpc2	61.06	37.01	0.72	3.8e-07
Jph3	357.44	218	0.72	4.3e-07
Ablim2	160.48	97.56	0.72	1.0e-09
Camk1d	166.38	100.83	0.72	2.4e-11
Lpar2	4.29	2.6	0.72	4.7e-02
Cnrip1	77.76	47.12	0.72	1.7e-08
Fbll1	62.06	38.01	0.72	2.7e-06
Epdr1	131.08	79.15	0.72	2.1e-10
Sybu	172.69	104.9	0.72	2.4e-11
Ntsr1	23.19	14.01	0.72	4.7e-05
Wnt7a	11.44	6.95	0.72	2.4e-03
Ywhah	524.24	318.51	0.72	1.6e-13
Tbcc	21.82	13.46	0.72	3.1e-04
Hscb	6.01	3.64	0.72	2.5e-02
Sult4a1	615.45	376.59	0.72	1.9e-08
Chst2	108.34	65.78	0.72	1.8e-10
Pcnx3	74.07	44.96	0.72	2.9e-09
Tox3	47.25	28.72	0.72	9.9e-08
Tle2	11.13	6.81	0.72	3.2e-03
Fam234b	239.37	144.7	0.72	9.7e-12
Frat2	6.9	4.2	0.72	1.5e-02
Cox6b1	190.44	116.14	0.72	1.5e-09
Fhod1	8.64	5.25	0.72	7.1e-03
Qpctl	20.35	12.34	0.72	8.7e-05
Hgh1	12.71	7.77	0.72	1.1e-03
Ccdc103	4.43	2.69	0.72	5.0e-02
Prdx2	191.83	117.31	0.72	2.4e-08
Arl8a	251.6	154.07	0.72	5.6e-10
Capn10	47.73	29.21	0.72	1.4e-06
Khdrbs1	197.3	120.22	0.72	2.1e-11
Polr2j	8.34	5.12	0.72	1.2e-02
Adat2	6.17	3.79	0.71	2.0e-02
Mettl13	30.63	18.7	0.71	1.3e-05
Syn1	591.17	360.02	0.71	8.3e-12
Tmem50a	60.03	36.37	0.71	4.7e-07
Lrrtm1	54.96	33.55	0.71	1.7e-07
Eef1b2	133.33	81.16	0.71	2.3e-10
A130010J15Rik	14.23	8.66	0.71	6.0e-04
Calm2	819.07	499.06	0.71	2.3e-13
Triap1	14.48	8.8	0.71	7.6e-04
Ppp3r1	630.39	385.05	0.71	1.4e-11
Rem2	7.69	4.69	0.71	9.3e-03
Fnip2	58.21	35.51	0.71	3.7e-08
Coq4	20.12	12.22	0.71	2.0e-04
Nupl2	14.06	8.54	0.71	7.1e-04
C130026L21Rik	9.8	5.98	0.71	7.5e-03
Spock1	368.83	224.06	0.71	3.9e-12
Mmab	62.5	38.42	0.71	2.4e-06
Gabarapl1	1014.24	622.32	0.71	2.5e-11
Gtpbp2	45.23	27.95	0.71	6.3e-06
Adap1	173.92	107.01	0.71	8.4e-07
Zfp251	87.99	53.85	0.71	2.0e-08
2210016L21Rik	146.85	90.32	0.71	1.2e-07
Cmpk2	65.62	40.16	0.71	1.0e-08
Rab24	29.11	17.84	0.71	6.8e-05
Cnnm1	110.97	67.71	0.71	1.5e-09
Slc38a7	25.79	15.77	0.71	1.2e-05
Lrfn3	31.35	19.19	0.71	9.8e-05
Irs2	205.38	125.93	0.71	2.0e-09
Dgkb	380.68	234.19	0.71	5.7e-11
Nsg1	432.69	264.8	0.71	3.1e-12
Fgf10	10.44	6.37	0.71	3.2e-03
Pcdhga7	10.79	6.6	0.71	2.4e-03
Actr1b	364.16	224.66	0.71	4.1e-08
Mcat	25.56	15.77	0.71	6.3e-04
Med26	20.05	12.4	0.71	6.0e-04
Commd9	39.63	24.43	0.71	1.5e-05
Btbd2	133.23	82.5	0.71	1.7e-07
Fbxl19	84.93	52.3	0.71	6.0e-07
Stk25	287.48	176.81	0.71	1.5e-08
Hdgfl2	72.5	44.55	0.71	2.2e-08
Ormdl3	48.07	29.42	0.71	4.9e-07
Rab9b	350.18	214.81	0.71	2.3e-12
Sun1	71.14	43.4	0.71	7.0e-08
Thap3	13	8.1	0.7	5.2e-03
Rbm28	54.52	33.44	0.7	5.7e-08
Hydin	12.21	7.62	0.7	3.5e-03
Rsph9	14.98	9.17	0.7	7.0e-04
Ube2o	317.97	196.05	0.7	5.3e-09
Alkbh7	19.61	12.14	0.7	9.4e-04
F730043M19Rik	13.46	8.29	0.7	1.3e-03
Camkk1	157.38	96.88	0.7	2.4e-08
Strn4	161.6	100.27	0.7	6.2e-07
Hint2	18.12	11.19	0.7	7.9e-04
Slc52a2	15.4	9.43	0.7	4.0e-04
Srm	40.17	24.66	0.7	1.8e-05
Lrrn2	119.03	72.8	0.7	1.1e-08
Gpat4	111.81	68.48	0.7	4.0e-09
Slitrk1	114.84	70.4	0.7	5.6e-10
Kcnab2	340.55	211.37	0.7	2.6e-08
Pa2g4	82.81	50.93	0.7	3.1e-09
Ube2a	44.93	27.64	0.7	5.3e-07
Ppp1r35	12.03	7.43	0.7	8.0e-03
Zmat2	158.26	97.31	0.7	3.4e-11
Polr2g	62.48	38.58	0.7	5.3e-07
Pex14	26.2	16.18	0.7	2.3e-05
Arpc1a	181.12	111.72	0.7	1.2e-09
Selenoh	25.46	15.79	0.7	7.2e-05
Kctd3	121.81	75.34	0.7	1.3e-08
Rnf10	312.89	193.35	0.7	2.2e-09
Usp22	799.44	492.81	0.7	4.8e-12
Avpi1	13.32	8.24	0.7	1.4e-03
Rrp36	17.91	11.15	0.7	6.9e-04
Nefl	473.87	292.02	0.7	3.1e-12
Tiam1	120.23	74.19	0.7	2.4e-10
Fxr2	201.07	125	0.7	1.1e-08
Ckmt1	344.66	213.73	0.7	1.9e-09
Zc2hc1c	14.89	9.2	0.7	6.0e-04
Asb6	33.84	20.98	0.7	2.5e-05
Nedd8	96.44	59.62	0.7	8.0e-09
Mrpl28	50.06	31.23	0.7	4.4e-05
Eid2	54.64	33.74	0.7	3.3e-07
Ube2q1	172.36	106.48	0.7	1.5e-09
Tmeff1	89.4	54.9	0.7	1.9e-08
Rps10	14.19	8.88	0.7	1.6e-03
Pdzd4	166.4	103.11	0.7	1.3e-08
Rhbdd2	142.69	87.76	0.7	1.1e-08
H3f3a	18.28	11.29	0.7	2.3e-04
Lypla2	88.48	55.1	0.7	2.9e-05
Surf2	26.63	16.45	0.7	1.6e-05
Decr2	58.25	35.93	0.7	5.9e-07
1810043G02Rik	49.21	30.64	0.7	2.6e-05
Cpne7	52.12	32.19	0.7	3.1e-06
Upf1	131.25	81.28	0.69	1.6e-07
Sac3d1	9.25	5.78	0.69	1.7e-02
Fbxo41	187.45	116.28	0.69	6.5e-09
Fam207a	35.91	22.43	0.69	4.9e-05
Yrdc	25.56	15.85	0.69	9.2e-05
B4galt7	24.1	14.95	0.69	7.5e-05
D430041D05Rik	197.33	122.13	0.69	2.9e-11
Ctbp1	330.85	205.71	0.69	1.1e-08
Ndufs8	57.39	35.61	0.69	2.3e-06
Vstm2l	57.81	35.74	0.69	3.5e-07
Neil1	5.26	3.25	0.69	4.4e-02
Mir22hg	15.32	9.46	0.69	6.0e-04
Ak1	169.74	105.59	0.69	1.6e-07
Ndufs6	31.74	19.74	0.69	4.4e-05
Prr36	56.3	34.74	0.69	2.2e-07
Gpr85	56.29	34.87	0.69	1.1e-07
Tenm4	317.08	195.33	0.69	9.5e-11
2310033P09Rik	12.29	7.62	0.69	2.0e-03
Fnta	119.92	74.32	0.69	6.8e-10
Ly6e	82.48	51.17	0.69	6.9e-09
Rnf182	22.58	14	0.69	5.7e-05
Clptm1l	101.51	62.6	0.69	3.5e-09
Fam174b	24.62	15.23	0.69	5.9e-05
Acot7	402.97	251.3	0.69	9.7e-09
Capn15	50.61	31.43	0.69	2.7e-06
Ankrd13d	74.11	45.95	0.69	1.5e-07
Rtf2	70.02	43.66	0.69	3.5e-07
Mrpl55	17.19	10.7	0.69	6.5e-04
Ppil1	16.69	10.32	0.69	1.0e-03
Cyb561d2	13.22	8.26	0.69	3.6e-03
Klhl7	192.73	119.51	0.69	3.5e-10
Maf1	74.16	46.2	0.69	4.0e-06
Armc6	38.74	24.23	0.69	3.9e-05
Rpl39	29.04	18.01	0.69	1.7e-05
Flot2	179.55	112.1	0.69	1.1e-07
Nat14	40.01	24.8	0.69	2.4e-05
Rp9	39.54	24.57	0.69	1.5e-06
Atp6v0b	104.48	64.14	0.69	1.5e-07
Lmtk3	148.45	92.16	0.69	7.1e-08
Slc16a11	10.13	6.32	0.69	7.7e-03
Taok3	92	57.25	0.69	4.4e-09
Zmat4	128.92	80.11	0.69	3.8e-10
Anapc5	218.96	135.89	0.69	6.8e-10
Pip4k2b	337.49	210.28	0.69	1.3e-09
Golga7b	176.92	110.57	0.69	3.6e-07
Kctd1	39.21	24.44	0.69	7.4e-06
Nol8	39.63	24.57	0.69	1.4e-05
Rnf219	33.3	20.7	0.69	8.9e-06
Mrpl10	84.41	52.56	0.69	4.1e-07
2410015M20Rik	38.94	24.34	0.69	5.8e-05
Camk1	90.56	56.59	0.69	3.4e-08
Zfand2a	119.41	74.79	0.69	4.3e-08
Gpatch1	30.4	18.92	0.69	9.3e-06
Pxylp1	17.73	10.97	0.69	1.2e-03
Calm3	1760.78	1103.85	0.68	4.3e-07
Akr1a1	458.84	287.47	0.68	7.8e-09
Zfp92	71.43	44.42	0.68	2.0e-08
Mrpl22	6.73	4.2	0.68	2.1e-02
Gprin1	197.61	123.76	0.68	5.0e-09
Thap11	54.47	34.04	0.68	1.3e-05
Mtcl1	104.82	65.21	0.68	3.1e-09
Anxa7	84.99	52.88	0.68	8.0e-09
Chmp4b	233.18	145.35	0.68	6.2e-10
Gnb2	327	204.47	0.68	5.1e-07
Rgs2	124.9	77.83	0.68	9.4e-10
Trim46	93.76	58.9	0.68	1.2e-06
Dglucy	16.84	10.44	0.68	1.2e-03
Slc27a4	101.3	62.84	0.68	2.8e-08
Diaph1	93.53	58.19	0.68	1.3e-08
A2ml1	5.62	3.55	0.68	4.1e-02
Impdh2	9.03	5.63	0.68	7.5e-03
1110008P14Rik	32.03	19.87	0.68	4.4e-04
Syt3	47.82	29.73	0.68	8.5e-07
Cox7a2	142.03	88.52	0.68	6.5e-09
Rfc3	8.7	5.42	0.68	8.0e-03
Zmynd19	43.77	27.29	0.68	4.6e-06
Gpn3	19.45	12.15	0.68	1.8e-04
Dtx3	207.28	130.25	0.68	3.4e-07
Gpx1	65.23	41.23	0.68	4.4e-05
Abcg1	104.37	65.02	0.68	6.3e-09
Ccdc12	11.47	7.16	0.68	5.1e-03
Chpf2	37.93	23.61	0.68	1.6e-05
Ddx28	19.27	12.07	0.68	3.5e-04
Tuba8	7.07	4.45	0.68	1.7e-02
Pcdhgb6	10.55	6.55	0.68	8.0e-03
Suv39h1	58.97	36.82	0.68	1.1e-07
Prkcg	102.9	64.38	0.68	1.5e-06
Hint1	122.32	76.32	0.68	1.4e-09
Nlgn2	413.39	257.86	0.68	4.8e-11
Scyl1	97.53	61.13	0.68	5.8e-06
Scap	66.73	41.55	0.68	1.8e-07
AI413582	24.61	15.52	0.68	2.9e-04
Coa3	56.46	35.24	0.68	1.4e-05
Tspan5	90.09	56.07	0.68	8.7e-09
Arhgap26	386.78	241.47	0.68	3.3e-12
Begain	144.5	90.27	0.68	3.8e-06
Ptpn3	42.37	26.47	0.68	3.4e-06
Brms1	10.9	6.83	0.68	4.5e-03
Zfp146	38.05	23.76	0.68	2.1e-06
Drp2	109.91	68.65	0.68	1.4e-09
Usp35	45.9	28.93	0.68	9.0e-06
Dalrd3	44.45	27.78	0.68	4.5e-06
C1qtnf12	7.25	4.51	0.68	1.9e-02
Trp53i11	136.13	85.09	0.68	9.7e-09
Fam155a	179.67	112.52	0.68	1.1e-09
Lingo1	86.18	53.88	0.68	3.4e-08
Tubb4b	186.06	117.11	0.68	6.3e-07
Gm6277	6.58	4.03	0.68	3.6e-02
Mrps16	25.97	16.33	0.68	2.5e-04
Nubp1	10.73	6.72	0.68	4.7e-03
Mcfd2	92.33	57.58	0.68	1.8e-08
Stard7	229.21	143.44	0.68	3.3e-11
Naa38	12.42	7.85	0.68	9.1e-03
Lynx1	418	262.27	0.68	6.2e-11
Csf2ra	7.04	4.45	0.68	3.0e-02
Pef1	112.25	70.52	0.68	3.1e-06
Srsf2	88.63	55.7	0.68	3.2e-08
Apopt1	22.71	14.17	0.68	1.8e-04
Sppl3	82.76	51.68	0.68	2.0e-08
Pde6d	56.81	35.78	0.68	1.1e-06
Coro2b	162.43	101.77	0.68	3.8e-09
Ptprf	196.22	122.4	0.68	1.6e-09
Cstb	18.51	11.64	0.68	5.9e-04
Cdk20	14.5	9.13	0.67	3.2e-03
9230112E08Rik	7.12	4.43	0.67	2.1e-02
Armcx5	39.48	24.71	0.67	4.8e-06
Slmap	185.85	116.42	0.67	7.7e-11
Kcnf1	52.31	32.75	0.67	1.3e-06
Gm42517	33.69	21.3	0.67	1.0e-04
Sidt1	26.18	16.26	0.67	1.4e-04
Klhdc3	188.02	118.82	0.67	6.1e-07
Lsm14b	123.16	77.26	0.67	9.4e-10
Get4	41.16	26.15	0.67	2.4e-04
Fam83h	6.93	4.37	0.67	2.2e-02
Tmem163	53.26	33.34	0.67	6.9e-07
Add3	138.32	86.49	0.67	4.8e-09
Rnf145	114.44	71.3	0.67	3.1e-08
Tkfc	19.18	12.14	0.67	1.1e-03
Atg101	26.33	16.54	0.67	7.5e-05
Usp21	45.77	28.98	0.67	1.2e-05
Gal3st3	21.15	13.24	0.67	1.7e-04
Spsb4	11.91	7.6	0.67	1.0e-02
Zfp941	125.01	78.46	0.67	9.5e-10
Sec61b	12.87	8.07	0.67	5.1e-03
Pip5k1c	322.73	203.77	0.67	4.7e-07
4931428F04Rik	33.99	21.44	0.67	2.9e-05
Adgrl2	122.8	77.14	0.67	1.6e-08
L1cam	266.6	165.39	0.67	1.1e-09
Gpatch4	17.74	11.14	0.67	6.6e-04
Syp	530.29	332.1	0.67	8.6e-11
Zfp771	21.19	13.71	0.67	6.4e-03
Nomo1	171.73	107.37	0.67	2.2e-08
Sntb1	20.5	12.87	0.67	1.8e-04
Fam241b	44.83	28.34	0.67	3.8e-05
Faim2	968.21	606.21	0.67	5.0e-10
Usp10	119.04	75	0.67	4.6e-09
Tmem208	10.72	6.66	0.67	5.1e-03
Nol3	24.5	15.41	0.67	2.3e-04
Ndufb11	71.61	45.05	0.67	2.3e-05
Sephs2	55.38	34.86	0.67	1.0e-06
Dlgap4	201.62	126.61	0.67	5.1e-08
Cbarp	675.01	426.24	0.67	1.9e-07
Manbal	44.11	27.71	0.67	1.6e-06
Abhd11	27.25	17.16	0.67	1.3e-04
Cacna1e	465.73	293.23	0.67	2.8e-09
Zfp697	32.19	20.25	0.67	5.3e-05
Setdb2	9.33	5.87	0.67	8.4e-03
Zfp786	10.84	6.79	0.67	5.0e-03
Senp3	60.62	38.22	0.67	3.6e-07
Spns2	56.48	35.55	0.67	2.0e-06
Rpl37a	20.47	12.94	0.67	2.7e-04
Pced1b	14.49	9.11	0.67	1.2e-03
Tspan7	652.86	408.8	0.67	1.2e-10
Ccdc177	44.75	28.19	0.67	1.2e-06
Xylt2	22.36	14.04	0.67	3.4e-04
Rfc2	33.52	21.15	0.67	7.6e-05
Tmem25	38.97	24.52	0.67	2.3e-05
Chrna7	29.07	18.27	0.67	2.3e-05
Eri3	193.22	122.55	0.67	4.2e-07
Spg21	47.44	29.88	0.67	4.8e-06
Krtcap2	26.34	16.64	0.67	9.2e-05
Selenow	237.53	149.82	0.67	3.2e-07
Cenpv	20.31	12.83	0.67	2.7e-04
Irf1	6.25	3.93	0.67	3.6e-02
Hspa12a	430.09	271.33	0.66	5.6e-11
Ogfod2	23.76	15.11	0.66	7.3e-04
Lysmd2	61.07	38.56	0.66	3.6e-07
Dlgap3	142.65	90.51	0.66	2.3e-05
Caprin1	437.76	276.07	0.66	2.2e-11
Rps19	36.85	23.27	0.66	1.1e-05
Fzr1	125.26	79.53	0.66	2.7e-06
Sf3b4	19.12	12.08	0.66	2.9e-04
Fam49a	173.16	109.32	0.66	1.8e-09
Mydgf	28.12	17.73	0.66	5.5e-05
Spcs1	58.35	36.69	0.66	1.0e-06
Slc35a2	19.89	12.36	0.66	9.9e-04
Fig4	62.41	39.44	0.66	5.3e-07
Tmem159	11.48	7.27	0.66	5.0e-03
Gtf2f1	39.01	24.7	0.66	8.5e-06
Cemip	9.27	5.88	0.66	1.1e-02
Mgat4b	33.97	21.48	0.66	1.6e-05
Parp16	8.44	5.33	0.66	1.3e-02
Pom121	64.01	40.44	0.66	1.7e-07
Hist1h1d	9.8	6.21	0.66	1.5e-02
Rtf1	138.55	87.7	0.66	2.4e-09
Grina	244.93	154.64	0.66	4.6e-10
Gnl1	224.48	142.8	0.66	5.3e-07
Klhl21	27.72	17.59	0.66	1.2e-04
Dtd1	73.66	46.88	0.66	9.9e-07
Rfc5	9.26	5.85	0.66	9.0e-03
Tuba1c	19.84	12.62	0.66	2.0e-03
Zcchc14	147.87	93.7	0.66	3.0e-08
Coro7	58.41	37.2	0.66	2.7e-06
Ptp4a2	265.57	167.98	0.66	1.5e-10
Ap5b1	7.66	4.87	0.66	2.0e-02
Fam217b	192.81	122.15	0.66	4.8e-10
Pfdn6	22.47	14.27	0.66	1.8e-04
Ptprs	431.09	271.72	0.66	1.1e-09
Kctd2	85.99	54.55	0.66	4.9e-08
Tut1	32.89	20.95	0.66	1.6e-04
Tpd52l1	31.39	19.88	0.66	1.5e-05
Csnk2a2	91.59	57.95	0.66	2.2e-08
Bad	23.68	15.16	0.66	6.4e-04
Cbln4	66.36	41.89	0.66	3.2e-07
Eif4g1	340.23	215.54	0.66	4.6e-11
G3bp2	350.31	221.92	0.66	3.4e-11
Adcy6	60.59	38.42	0.66	2.2e-07
Ubtf	108.25	69.04	0.66	1.3e-07
Nefm	147.3	93.82	0.66	1.1e-06
Cd99l2	205.68	129.11	0.66	2.7e-07
Lrfn1	66.42	41.99	0.66	3.6e-05
Slc35f3	36.61	23.2	0.66	8.9e-06
Eif4h	459.94	292.42	0.66	7.7e-11
Arpp21	98.08	62.25	0.66	5.6e-08
Spryd4	9.28	5.92	0.66	1.9e-02
Sh3gl3	75.15	47.64	0.66	1.6e-07
Fuk	15.33	9.64	0.66	3.9e-03
Racgap1	19.27	12.27	0.66	5.2e-04
St3gal1	35.63	22.48	0.66	2.9e-05
Itgb1bp1	29.05	18.46	0.66	6.5e-05
Ninj1	17.59	11.24	0.66	2.2e-03
Mrpl54	14.01	8.93	0.66	3.0e-03
Znhit2	23.64	15.11	0.66	1.5e-03
Tmem214	57.02	36.27	0.66	2.0e-06
Mon1a	19.77	12.53	0.66	1.5e-03
Wasl	241.04	152.66	0.66	6.2e-09
Gria1	499.57	315.28	0.66	8.8e-10
Coq5	67.46	42.97	0.65	1.8e-06
Mrps23	56.25	35.9	0.65	2.1e-05
2310022A10Rik	46.06	29.32	0.65	5.7e-05
Ranbp3	101.43	64.85	0.65	4.4e-07
Pgp	58.31	37.54	0.65	4.8e-04
Cltb	203.43	129.63	0.65	3.0e-08
Lancl1	200.17	127.33	0.65	2.2e-09
Med4	19.36	12.4	0.65	7.7e-04
Nop2	36.3	23.16	0.65	2.5e-05
Rpl18a	39.76	25.36	0.65	1.1e-05
Tmed9	64.56	40.67	0.65	6.9e-06
Rpl35a	22.97	14.65	0.65	1.3e-04
Siah1b	6.07	3.85	0.65	4.3e-02
Pkm	955.56	612.44	0.65	1.6e-08
Wdr45b	102.95	65.79	0.65	2.3e-07
E130309D02Rik	26.86	17.19	0.65	3.8e-04
Carmil2	42.59	27.42	0.65	2.5e-04
Dnajc16	85.55	54.06	0.65	2.1e-07
Arl10	40.61	25.76	0.65	1.2e-05
Cant1	69.36	44	0.65	1.2e-06
Kank3	9.86	6.3	0.65	1.4e-02
Uchl1	907.8	583.06	0.65	3.3e-07
Ksr2	110.96	70.61	0.65	1.7e-08
Ilf3	160.58	102.58	0.65	6.2e-09
Chmp2b	76.43	48.68	0.65	5.6e-07
Gas6	76.67	48.57	0.65	2.6e-07
Gstm7	35.63	22.78	0.65	3.6e-05
Rfxap	43.14	27.5	0.65	4.9e-06
Numbl	128.81	82.01	0.65	1.3e-06
Fbrsl1	45.21	28.81	0.65	4.0e-06
Vstm5	22.04	14.13	0.65	9.3e-04
Ccar2	181.27	116.17	0.65	6.9e-08
Cdk5r2	131.04	83.8	0.65	3.4e-06
Coq8b	20.3	13	0.65	1.3e-03
Mgat3	298.15	190.33	0.65	4.8e-09
Pdgfb	9.3	5.79	0.65	2.3e-02
Znrf1	119.1	76.31	0.65	3.2e-07
Rpl41	41.06	26.12	0.65	6.7e-05
Dph1	12.02	7.56	0.65	1.1e-02
Noct	80.23	51.2	0.65	6.7e-08
Dmac1	19.52	12.45	0.65	3.5e-04
Fastk	51.98	33.59	0.65	3.4e-04
E2f4	21.85	13.94	0.65	7.6e-04
Polr2f	22.68	14.49	0.65	3.8e-04
Gap43	640.08	409.13	0.65	2.6e-10
D230025D16Rik	56.05	35.93	0.65	2.3e-06
Atp5e	69.46	44.39	0.65	3.1e-05
Pcdhga4	6.68	4.15	0.65	4.0e-02
Bckdk	50.75	32.46	0.65	8.0e-06
Rpl27a	44.65	28.48	0.65	3.1e-06
Plpp7	16.99	10.92	0.65	1.1e-03
Brinp2	62.63	40.01	0.65	4.4e-07
Chmp7	167.78	107.7	0.65	7.3e-07
Nudt10	49.08	31.21	0.65	6.5e-06
4933404O12Rik	31.07	19.82	0.65	4.6e-05
Anp32a	126.95	81.19	0.65	3.7e-09
Fance	16.84	10.75	0.65	2.4e-03
Ap4s1	52.57	33.67	0.65	1.4e-06
Anapc11	58.01	37.13	0.64	1.2e-05
Thoc3	70.05	45.01	0.64	1.6e-06
Slc4a10	199.12	127.5	0.64	2.4e-08
Prrc2a	693.06	444.14	0.64	8.3e-08
Fam133b	33.66	21.45	0.64	3.3e-05
Tmem199	53.65	34.33	0.64	1.6e-06
Fasn	783.9	503.45	0.64	5.5e-08
Sipa1	14	9	0.64	7.7e-03
Dmac2	51.1	32.91	0.64	2.9e-05
Rapgef2	320.69	205.44	0.64	1.1e-09
Ighmbp2	20.37	13.16	0.64	1.5e-03
Nol12	23.46	15.04	0.64	9.3e-04
Cobl	137.2	87.93	0.64	5.3e-09
Mrps12	27.45	17.58	0.64	4.2e-04
Rara	13.79	8.87	0.64	5.7e-03
Lpin2	203.92	130.54	0.64	2.5e-09
Slc25a19	32.91	21.14	0.64	6.3e-05
Mad1l1	23.96	15.44	0.64	2.8e-04
Surf4	66.63	42.57	0.64	3.4e-07
Cetn2	48.97	31.42	0.64	2.7e-06
Grem2	56.06	35.76	0.64	8.6e-06
Zfp213	7.26	4.66	0.64	2.1e-02
Aes	614.68	395.62	0.64	4.3e-06
Grik4	53.01	33.95	0.64	1.0e-06
Mogs	29.08	18.44	0.64	4.8e-04
Tmub2	46.31	29.65	0.64	4.5e-06
Man1b1	107.18	68.58	0.64	1.7e-07
Rpl34	10.25	6.48	0.64	1.8e-02
Chp1	261.12	167.79	0.64	6.0e-09
Klhl36	12.27	7.83	0.64	2.2e-02
Vamp2	1290.4	828.77	0.64	9.0e-10
Pomgnt2	63.98	40.8	0.64	3.1e-06
Kmt2b	104.92	67.47	0.64	9.5e-08
Nudt3	283.93	182.79	0.64	8.2e-08
Traf7	33.91	21.86	0.64	1.3e-04
Mrnip	6.56	4.19	0.64	3.0e-02
Bet1l	24.18	15.51	0.64	1.7e-04
Ncaph2	102.22	65.76	0.64	6.9e-06
Rtn1	1134.21	725.41	0.64	3.8e-10
Taf6	29.95	19.35	0.64	3.0e-04
Naa60	93.94	60.41	0.64	3.9e-06
Rps14	106.9	68.62	0.64	4.7e-05
Armc10	20.08	12.91	0.64	4.4e-04
Pdcd2l	16.47	10.63	0.64	3.0e-03
Atg9a	58.64	37.59	0.64	5.8e-07
Sstr4	5.85	3.77	0.64	4.3e-02
Lipt1	7.17	4.66	0.64	2.8e-02
Hyal2	9.1	5.86	0.64	1.3e-02
Zdhhc4	20.9	13.4	0.64	3.3e-04
Prelid1	61.55	39.69	0.64	6.6e-05
Rab36	76.65	49.14	0.64	9.1e-07
Tesk1	47.85	30.95	0.64	5.9e-05
Dut	31.42	20.23	0.64	7.4e-05
1110038F14Rik	10.45	6.78	0.64	1.1e-02
Sra1	68.83	44.37	0.64	4.7e-07
Eif2b3	26.92	17.29	0.64	7.7e-05
Acvr1b	142.5	91.41	0.64	2.0e-08
Rad9a	12.52	8.01	0.64	6.6e-03
Rita1	18.68	12.08	0.64	2.4e-03
Ppp1r16a	79.89	51.41	0.64	5.0e-05
Prepl	1161.99	747.8	0.64	1.5e-11
Trappc1	28.48	18.34	0.64	8.1e-05
Otub1	347.7	225.67	0.64	5.7e-07
Aen	33.73	21.85	0.64	1.5e-04
Praf2	19.26	12.32	0.64	5.9e-04
Atp5g3	352.15	226.61	0.64	6.2e-09
Mak	6.23	4.03	0.64	4.7e-02
Zfp444	68.39	43.82	0.64	1.6e-05
Aloxe3	10.51	6.73	0.63	7.7e-03
Cox5a	114.7	73.83	0.63	6.0e-08
Lcmt1	93.97	60.69	0.63	3.6e-07
Serp2	67.24	43.43	0.63	1.6e-05
Arhgap33	93.42	60.02	0.63	2.3e-05
Mzt2	17.89	11.58	0.63	1.4e-03
Gdi1	843.41	544.85	0.63	9.6e-11
Slbp	34.01	21.93	0.63	2.3e-05
Zfp385b	23.27	15.01	0.63	2.0e-04
Grm8	28.26	18.25	0.63	1.2e-04
Tomm40l	17.14	11.06	0.63	2.9e-03
Dvl1	113.98	74.09	0.63	2.8e-05
Pfn1	106.88	69.2	0.63	6.3e-06
Mrto4	20.95	13.59	0.63	4.8e-04
Trim35	337.76	218.79	0.63	7.0e-08
Cenpx	6.24	4.06	0.63	3.8e-02
Rbm15b	91.14	59.14	0.63	3.2e-06
Ppp2r2c	605.94	391.73	0.63	1.4e-07
Camk2n2	174.9	113.68	0.63	2.9e-05
Hmga1	13.84	9.15	0.63	1.9e-02
Pcdhga5	6.25	3.95	0.63	4.1e-02
Magee1	474.05	306.48	0.63	6.2e-10
Ppp1r12c	109.67	71.4	0.63	1.5e-05
Fam196b	70.36	45.46	0.63	3.7e-07
Tomm22	54.71	35.47	0.63	2.6e-05
Ehmt2	243.06	158.06	0.63	8.3e-07
Grm5	277.28	178.95	0.63	4.6e-09
Pkp2	6.87	4.43	0.63	3.1e-02
Rab4a	62.42	40.53	0.63	3.8e-05
Rpa1	65.51	42.39	0.63	5.3e-07
Hmga1b	6.33	4.1	0.63	3.5e-02
Zc3h13	82.82	53.57	0.63	1.4e-07
Sh3glb2	174.49	113.16	0.63	8.5e-06
Wdr54	16.41	10.68	0.63	2.1e-03
Atp8a2	183.65	118.25	0.63	7.4e-08
Bhlhb9	137.06	88.62	0.63	8.2e-09
Zranb3	12.2	7.89	0.63	4.3e-03
Slc45a4	90.17	58.35	0.63	9.9e-08
D1Ertd622e	61.4	39.74	0.63	6.9e-07
Cfap74	13.38	8.67	0.63	3.1e-03
Ndufc2	68.69	44.46	0.63	5.4e-07
Rtn2	85.17	55.18	0.63	7.1e-05
Gna11	187.24	121.91	0.63	3.2e-06
Htatip2	8.95	5.8	0.63	1.3e-02
Commd8	75.5	48.88	0.63	4.0e-07
Mrpl19	39.1	25.43	0.63	4.9e-05
Izumo4	17.45	11.3	0.63	1.9e-03
Clstn1	789.18	507.77	0.63	2.2e-09
Ywhag	2488.67	1616.77	0.63	3.4e-09
Psmg1	23.78	15.44	0.63	5.0e-04
Optn	43.07	27.99	0.63	1.1e-05
Mb21d2	81.77	53.05	0.63	2.1e-07
Snx2	90.75	58.78	0.63	1.6e-07
Ptov1	208.57	136.18	0.63	4.0e-05
2510039O18Rik	26.91	17.42	0.63	8.9e-04
Plcxd2	414.6	268.56	0.63	4.5e-09
Zdhhc22	111.62	72.26	0.63	8.7e-08
Armc5	17.38	11.29	0.62	3.5e-03
Tmem222	73.35	47.48	0.62	6.9e-07
Kif27	9.37	6.13	0.62	1.5e-02
Dhx32	46.56	30.24	0.62	8.3e-06
Cep41	14.01	9.07	0.62	2.7e-03
Oaz2	108.62	70.96	0.62	2.1e-06
Eno4	6.83	4.42	0.62	3.1e-02
Dcaf12l1	219.3	142.34	0.62	2.4e-09
Nhlrc1	45.59	29.56	0.62	5.1e-06
Cdc34	23.63	15.49	0.62	1.5e-03
Gabrq	132.13	85.89	0.62	1.1e-05
Me2	62.71	40.71	0.62	8.9e-07
Zbtb22	37.1	24.17	0.62	3.7e-04
Ddx24	348.37	226.75	0.62	7.5e-10
Mrpl2	23.3	15.21	0.62	4.3e-04
Cdk5	137.04	89.03	0.62	1.5e-06
H2afy2	20.09	13.05	0.62	5.0e-04
Rwdd2a	80.14	52.1	0.62	2.9e-07
Ppp6r1	171.44	111.95	0.62	1.3e-06
Mrpl36	21.98	14.26	0.62	5.1e-04
Sh3rf3	28.1	18.27	0.62	8.7e-05
Mapkbp1	74.99	48.67	0.62	3.1e-07
Spire2	50.93	33.47	0.62	4.1e-05
Fam189a1	44.13	28.61	0.62	1.1e-05
2310011J03Rik	22.61	14.77	0.62	1.2e-03
Ddost	80.94	52.39	0.62	2.8e-07
Efcc1	14.61	9.54	0.62	2.7e-03
Bag2	15.77	10.28	0.62	1.6e-03
Rilpl2	10	6.53	0.62	1.1e-02
Zfp13	23.43	15.32	0.62	5.3e-04
Mrpl37	39.52	25.68	0.62	2.5e-05
Vps26b	205.14	133.72	0.62	1.3e-08
Crls1	38.42	24.9	0.62	4.5e-05
Syngr3	218.45	141.43	0.62	4.9e-08
Hps6	16.89	11.09	0.62	6.1e-03
Zfp85os	6	3.89	0.62	4.4e-02
[truncated: 51,805 more rows]
