# Supplementary material for: Cross-species analysis defines the conservation of anatomically segregated VMH neuron populations
Source: eLife journal article supplement (doi:10.7554/elife.69065), 2021-05-21
Supplement: supp [file elife-69065-supp-v1.zip › elife_poa_e69065_Supplementary_file_2.csv]

Gene	Bead	Sup	Enrichment	P
Teddm3	1.75	0.17	4.03	1.1e-13
Nr5a1os	13.4	1.22	3.62	1.0e-33
Duox2	0.26	0.03	3.3	4.5e-03
Nr5a1	29.73	4.44	3.27	1.1e-15
Olfr263	0.37	0.05	3.21	4.3e-04
Gpr149	197.76	23.12	3.13	7.4e-175
4930405L22Rik	0.2	0.02	3.02	5.6e-03
Prss30	10.65	1.48	3.01	9.6e-47
Apol7e	0.61	0.08	3	2.7e-05
Hmcn2	61.53	8.85	2.82	9.3e-125
Cib3	0.52	0.08	2.81	6.8e-04
Tll2	19.54	2.95	2.78	4.0e-68
Olfr1406	1.48	0.25	2.63	1.2e-12
Cyp19a1	6.77	1.01	2.62	3.9e-20
U90926	0.22	0.03	2.56	3.5e-02
Rab38	6.59	1.14	2.53	4.5e-30
Acp7	4.22	0.76	2.48	9.0e-26
Lama1	85.29	16.04	2.44	1.9e-113
Gjb3	0.5	0.09	2.4	6.0e-05
Sox14	17.63	3.45	2.37	5.6e-20
Slit3	682.66	131.26	2.34	3.2e-100
Olfr876	0.21	0.04	2.34	3.9e-02
B230110G15Rik	2.66	0.58	2.3	2.1e-08
Vmn2r38	3.09	0.59	2.28	2.8e-18
Foxn1	0.57	0.14	2.27	3.4e-05
Gpx6	0.48	0.14	2.24	6.0e-04
Clca3a2	4.67	0.98	2.23	3.8e-18
Neurod4	0.42	0.1	2.23	1.2e-03
Dppa2	0.28	0.05	2.19	2.6e-02
Tmem61	0.34	0.07	2.18	2.1e-02
Satb2	75.51	17.05	2.18	4.7e-46
Umodl1	4.56	0.99	2.17	8.2e-23
Qrfpr	60.35	14.42	2.17	5.9e-28
1700063A18Rik	0.2	0.05	2.15	4.8e-02
Cryge	1.22	0.29	2.14	9.0e-09
7330404K18Rik	0.39	0.08	2.14	9.1e-03
Hs3st4	898.92	205.82	2.14	5.5e-143
Retn	8.14	1.94	2.09	8.1e-27
Zfp831	37.56	8.91	2.08	4.0e-101
Fermt1	17.71	4.32	2.07	2.4e-68
Mrgprx2	2.58	0.24	2.07	1.3e-03
B930018H19Rik	4.4	0.96	2.06	3.6e-13
Wnt1	1.52	0.4	2.06	7.5e-09
Hs3st3b1	11.26	2.78	2.05	1.1e-40
Kank4os	1.35	0.34	2.03	2.5e-07
D430036J16Rik	23.27	5.65	2.03	8.3e-62
Rai14	46.19	12.4	2.02	1.5e-24
Samd7	5.3	1.4	1.99	1.1e-21
Zswim2	1.75	0.44	1.99	3.7e-11
AU017674	1.23	0.3	1.99	2.0e-06
Tyr	1.28	0.39	1.97	8.2e-07
Rin1	6.85	1.73	1.97	6.2e-30
Cacna2d1	1440.44	371.06	1.96	9.2e-81
Megf11	218.69	56.14	1.94	2.4e-92
Spint1	6.51	1.8	1.94	4.1e-20
Hsd17b2	6.45	1.73	1.93	3.1e-24
Acaa1b	3.6	1.06	1.92	6.0e-13
Kcna10	0.83	0.22	1.91	5.9e-06
Cdc20b	15.62	4.18	1.91	2.3e-20
BC051537	0.9	0.26	1.89	5.7e-05
4933428C19Rik	2.1	0.59	1.88	1.3e-10
Rbfox1	6240.38	1722.92	1.87	1.8e-134
Wnt10b	0.48	0.13	1.86	1.2e-03
4933431M02Rik	2.34	0.63	1.86	1.7e-12
Trim40	0.3	0.07	1.86	3.9e-02
Gdf6	0.63	0.16	1.85	3.1e-04
1700037F24Rik	0.97	0.27	1.85	1.2e-04
Vgll2	6.78	1.92	1.84	9.6e-13
Hipk4	25.62	7.31	1.83	6.0e-68
Kcnv2	5.63	1.51	1.82	3.8e-18
Nptx2	52.16	18.73	1.82	5.1e-18
1700057H21Rik	0.68	0.22	1.8	3.3e-04
Gda	182.48	53.6	1.8	1.0e-55
Lrriq4	0.34	0.09	1.79	1.2e-02
Glra1	103.47	29.8	1.79	7.0e-126
Lemd1	78.69	22.6	1.79	2.8e-67
Cnih3	53.87	15.92	1.78	7.2e-78
Gpr150	14.18	4.2	1.77	6.7e-18
Tnfrsf8	17.14	5.27	1.77	2.0e-23
Slc17a8	6.97	2.08	1.77	3.6e-19
Nr1h4	1.77	0.57	1.76	5.0e-09
Ankrd33b	14	4.29	1.75	1.3e-26
Rerg	155.44	46.12	1.75	8.9e-124
2310034O05Rik	0.4	0.12	1.74	5.3e-03
Steap3	21.49	6.61	1.72	4.5e-19
Sntg2	148.16	44.44	1.71	1.7e-109
Lgr5	29.87	9.08	1.71	1.6e-35
Il23a	0.61	0.2	1.7	7.7e-04
A830029E22Rik	0.31	0.11	1.7	3.0e-02
Arpp21	489.79	152.97	1.7	3.5e-75
Fndc1	103.91	31.65	1.69	6.9e-75
Adamts18	71.87	22.67	1.69	8.1e-116
2310075C17Rik	0.57	0.2	1.68	1.0e-03
Fezf1	38.69	14.73	1.68	1.8e-19
Cdh4	573.29	182.68	1.66	5.7e-97
Catsperg2	7.48	2.37	1.66	9.6e-22
Cdh13	1004.8	318.44	1.66	1.2e-131
Chil3	2.05	0.63	1.65	1.4e-08
Akr1cl	3.35	1.08	1.65	1.5e-11
Ros1	28.81	9.24	1.65	9.4e-67
Mhrt	11.36	3.57	1.64	9.0e-17
Htr1b	25.78	8.21	1.64	5.3e-53
Disp3	81.79	26.59	1.64	9.2e-77
Fam83b	4.34	1.58	1.64	7.6e-15
4933440M02Rik	1.05	0.39	1.63	4.5e-05
Rasal1	70.54	22.81	1.63	1.6e-87
Ssxb3	0.32	0.11	1.63	3.2e-02
Chst8	100.43	33.49	1.62	3.7e-56
H2-Q10	2.1	0.74	1.61	4.6e-07
Tmem132d	482.73	157.94	1.61	6.1e-93
Ccnjl	31.28	10.21	1.61	3.1e-27
Lrrn4	2.92	0.98	1.6	1.6e-10
Cnr1	120.92	38.87	1.59	9.3e-30
Gpr174	0.46	0.14	1.59	2.8e-02
Lmo3	180.21	60.01	1.59	1.4e-55
4933413L06Rik	36.51	13.4	1.58	2.6e-42
9230117E06Rik	2.36	0.83	1.57	1.4e-09
Cyp4a12a	0.35	0.11	1.57	2.6e-02
Edaradd	10.01	3.43	1.57	5.0e-12
Tenm2	5427.48	1872.64	1.57	7.0e-48
Mst1r	3.66	1.31	1.57	1.6e-11
1700031A10Rik	0.37	0.13	1.56	3.4e-02
Oprd1	24.13	7.98	1.56	1.0e-33
C030017D09Rik	0.75	0.25	1.55	2.6e-04
Gldn	15.83	5.24	1.55	1.3e-24
Pkp2	51.52	17.73	1.55	1.3e-66
Atp6v1c2	15.36	5.42	1.54	7.1e-28
Camkv	334.02	120.98	1.54	2.3e-72
Prss54	0.93	0.31	1.53	1.6e-04
Olfr889	13.96	10.31	1.53	2.6e-09
Banf2	121.4	42.52	1.53	7.7e-43
Unc45b	7.53	2.31	1.53	1.2e-04
Prdm13	2.42	0.85	1.53	1.8e-06
Traip	47.8	16.65	1.53	2.4e-55
Rgs21	0.9	0.38	1.52	2.1e-03
Kir3dl2	20.6	7.19	1.52	9.8e-55
4930484H19Rik	1.42	0.51	1.52	1.2e-06
Slc9b2	34.13	12.05	1.51	1.0e-49
Nkd2	12.67	4.49	1.51	1.6e-39
Ybx2	7.52	2.74	1.51	5.2e-20
Kcnq3	810.78	291.2	1.5	2.6e-205
Adam33	6.11	2.22	1.5	1.1e-24
Gypa	10.61	3.81	1.49	2.7e-29
Galnt17	530.54	190.44	1.49	3.9e-133
Lcorl	446.23	163.48	1.47	2.1e-93
Nr0b1	4.96	2.14	1.47	1.5e-08
F2rl3	0.46	0.16	1.47	1.1e-02
D630023F18Rik	16.74	6.07	1.47	3.9e-44
Clrn1	3.77	1.42	1.46	9.9e-13
Slc5a4a	0.77	0.3	1.45	1.8e-03
Mug2	0.73	0.25	1.45	1.5e-02
Vmn2r84	4.01	1.41	1.45	8.9e-08
Nek10	111.62	41.07	1.44	1.5e-57
Dscc1	1.01	0.39	1.44	2.3e-04
A730049H05Rik	4.97	1.78	1.43	2.9e-10
Dgkg	262.98	97.53	1.43	8.6e-95
1810008B01Rik	0.3	0.1	1.43	4.5e-02
Cfap73	9.32	3.6	1.43	4.6e-17
Grm5	2059.88	776.35	1.43	2.1e-62
Col8a1	45.52	16.96	1.42	5.1e-56
Palmd	41.75	15.92	1.42	1.8e-30
Hydin	115.77	43.68	1.42	1.4e-15
Kcnb2	1601.65	604.73	1.42	3.2e-98
Col12a1	14.17	5.31	1.42	1.7e-13
Srrm4os	47.01	17.89	1.42	2.9e-39
Fancd2	15.62	5.59	1.42	8.9e-11
Hcn1	430.21	162.74	1.42	6.4e-74
Ldb2	510.54	191.19	1.41	6.7e-77
Rasgrf2	391.26	143.14	1.41	1.0e-41
Hs3st2	17.42	6.72	1.4	7.5e-29
Trdc	0.48	0.22	1.39	3.4e-02
Mslnl	0.79	0.29	1.39	1.6e-03
Mcidas	1.26	0.45	1.38	2.5e-04
Cadps2	513.81	194.64	1.38	1.6e-72
Nectin3	118.77	44.94	1.38	9.4e-68
Glra3	189.98	73.73	1.38	2.7e-43
1700041I07Rik	0.54	0.18	1.38	2.0e-02
Doc2b	78.55	29.52	1.38	1.0e-33
Defb23	1.42	0.6	1.38	1.8e-05
Ankrd34b	38.98	15.24	1.37	1.8e-24
Actn2	31.5	12.41	1.37	5.3e-31
Atf7ip2	3.24	1.21	1.37	2.2e-06
Mcemp1	0.77	0.33	1.37	8.0e-03
Tespa1	7.93	3.19	1.37	2.1e-09
Car10	1205.35	471.18	1.36	2.8e-69
Ano5	85.5	33.86	1.36	8.6e-41
Htr2a	28.09	10.9	1.36	1.1e-36
4930528G23Rik	0.65	0.3	1.35	4.6e-03
Actc1	0.37	0.15	1.35	3.5e-02
Adamts9	51.37	20.12	1.35	2.2e-34
Cckbr	14.18	5.67	1.34	4.8e-21
4930426D05Rik	3.71	1.67	1.34	1.9e-06
Fam189a1	379.45	151.93	1.34	1.3e-103
Slc17a6	198.57	79.56	1.34	1.4e-31
Adrb3	5.7	2.37	1.33	3.4e-15
Cntn5	2115.69	838.54	1.33	4.9e-33
Prok1	0.5	0.2	1.32	3.6e-02
Cd96	1.69	0.67	1.32	9.3e-05
Kcnh5	135.3	54.71	1.32	1.9e-64
A230108P19Rik	4.52	1.87	1.32	4.1e-14
Tnn	0.84	0.4	1.32	7.0e-03
H2-Q2	34.18	16.38	1.32	1.0e-11
Itpka	12.49	5.08	1.32	1.8e-17
Bdnf	44.75	18.84	1.31	1.5e-18
6430628N08Rik	9.73	3.9	1.31	1.6e-09
Nlrp9c	3	1.24	1.31	9.5e-08
Rgs14	10.9	4.58	1.31	1.3e-19
Chrna7	57.47	23.62	1.31	1.6e-24
Ttll2	0.6	0.25	1.31	1.7e-02
Galnt18	262.86	106.92	1.3	2.7e-54
5830468F06Rik	0.6	0.23	1.3	2.6e-02
Chil4	0.4	0.16	1.3	3.8e-02
Slc24a4	39.63	15.98	1.3	2.0e-31
Sstr3	5.82	2.47	1.3	4.6e-12
Btla	6.56	2.64	1.29	2.9e-08
Hsh2d	0.97	0.44	1.29	4.7e-03
Vmn2r85	19.56	8.13	1.29	9.6e-20
Glipr1	21.76	9.38	1.28	1.3e-16
Nkx2-1	49.64	23.32	1.27	1.4e-12
Tox3	154.55	65.67	1.27	1.5e-30
Rnf207	31.25	13.17	1.27	4.3e-16
Kcnh7	788.3	327.91	1.27	6.4e-44
Srrm4	302.12	128.12	1.27	1.9e-44
Adgrl2	230.97	96.34	1.27	3.0e-78
Ryr3	360.75	153.5	1.26	7.0e-33
P4ha3	42.09	17.08	1.26	3.8e-23
Izumo1r	0.37	0.16	1.26	4.2e-02
Kctd19	0.65	0.32	1.26	3.1e-02
A730045E13Rik	0.97	0.41	1.25	2.9e-03
Brinp3	1489.43	623.9	1.25	7.6e-44
Pate4	0.53	0.24	1.25	1.2e-02
Pifo	85.03	36.88	1.25	1.3e-52
Opn5	2.96	1.38	1.24	2.0e-07
Chrdl2	0.68	0.33	1.24	1.5e-02
Gbgt1	1.67	0.65	1.24	6.2e-04
Kir3dl1	10.01	4.32	1.24	8.1e-17
Fbxo27	11.7	4.89	1.24	9.4e-32
Chil5	19.95	8.49	1.24	7.0e-20
Ccdc187	31.77	13.38	1.24	2.5e-48
Kcnj5	10.11	4.4	1.24	2.1e-10
Ptprr	239.88	102.4	1.24	2.4e-53
Gabra5	147.79	64.16	1.23	1.0e-42
Hs6st3	827.57	355.98	1.23	4.0e-49
Apol8	4.96	2.25	1.23	8.3e-13
Sgcz	3569.78	1541.6	1.23	5.5e-36
Prmt8	41.04	17.16	1.22	4.3e-33
Phf11c	3.06	1.28	1.22	2.1e-08
Camk1g	37.82	16.15	1.22	8.2e-31
4933415A04Rik	1.02	0.45	1.22	8.2e-04
Hamp2	0.53	0.22	1.21	4.1e-02
Itga8	14.38	6.96	1.21	4.6e-09
Fxyd5	18.8	8.73	1.21	6.6e-13
Tcerg1l	102.15	43.01	1.2	4.3e-31
Synpo	29.12	12.42	1.2	4.1e-34
E430024P14Rik	115	49.72	1.2	3.4e-59
4930488N15Rik	0.99	0.4	1.2	3.1e-03
Wbscr25	1.25	0.59	1.2	2.8e-04
Adcyap1	74.38	36.45	1.2	6.0e-13
4933424G06Rik	58.53	25.72	1.2	2.7e-79
Hcrtr1	8.35	4.02	1.19	3.9e-13
Cryga	0.66	0.34	1.19	8.0e-03
Zfp385b	294.64	131.98	1.19	3.9e-22
4933417O13Rik	1.83	0.75	1.19	8.5e-04
Zan	10.41	4.84	1.18	2.2e-07
Chrm1	14.26	6.3	1.18	8.9e-15
Vsig2	0.46	0.2	1.17	3.7e-02
Slc44a4	1.67	0.71	1.17	4.8e-03
Tgfbr3	118.24	52.76	1.17	1.3e-86
Gcsam	0.71	0.36	1.17	1.1e-02
Myh7	15.84	7.45	1.17	1.2e-23
Tdrd5	16.27	7.3	1.17	1.3e-20
Pcsk4	32.55	14.22	1.17	1.2e-37
Col6a3	4.9	2.17	1.17	9.7e-11
4931419H13Rik	1.49	0.6	1.16	4.2e-04
Kcnip2	73.1	32.88	1.16	1.7e-109
Fstl4	400.35	177.28	1.16	8.2e-49
Ncaph	1.84	0.82	1.16	3.5e-05
D030068K23Rik	124.24	56.04	1.16	1.2e-23
Sct	0.89	0.46	1.16	3.7e-02
Nek2	0.85	0.36	1.16	3.7e-03
2210420H20Rik	4.88	2.23	1.15	6.5e-09
4930401C15Rik	2.03	0.89	1.15	9.4e-06
Ptpn18	16.05	7.44	1.15	5.1e-12
Btbd11	238.71	108.18	1.15	1.2e-176
A830011K09Rik	7.94	3.53	1.14	7.8e-14
Rsph3a	119.87	54.2	1.14	3.5e-64
Muc15	1.86	0.9	1.14	1.2e-03
Esyt3	63.95	29.79	1.14	8.4e-38
Hcrtr2	73.46	34.08	1.13	9.6e-25
Pkd1l2	6.44	3.16	1.13	5.1e-07
3100003L05Rik	4.24	2.12	1.13	3.4e-05
Myo1a	1.84	0.86	1.12	3.6e-05
Phactr1	1181.25	550.38	1.12	5.1e-81
Rgs11	123.67	56.85	1.12	4.4e-56
Myrfl	2.5	1.19	1.12	1.4e-06
Atp8a2	385.85	180.39	1.12	4.8e-75
Cpne8	103.18	47.54	1.12	1.2e-48
Dll4	2.12	0.98	1.12	5.5e-05
Stc2	1.24	0.61	1.12	2.6e-04
Chrm5	1.89	0.95	1.12	3.4e-03
Zbtb7c	165.3	76.01	1.11	7.0e-67
Opcml	2075.14	983.64	1.11	1.4e-29
Cntn3	475.32	224.69	1.11	1.9e-19
Grin2a	393.79	185.23	1.11	4.9e-52
Itpr1	209.68	97.06	1.11	7.5e-62
Cdh7	101.98	47.41	1.11	2.8e-15
Strip2	19.86	9.3	1.11	8.1e-24
Vdr	1.25	0.47	1.11	1.0e-02
Scn5a	43.19	20.12	1.1	1.6e-27
Clnkos	0.5	0.24	1.1	2.6e-02
Catsperz	1.52	0.71	1.1	3.7e-04
Myo1h	10.65	4.94	1.1	1.6e-09
Deup1	14.11	6.57	1.09	2.0e-27
Matn3	0.64	0.31	1.09	3.9e-02
Myo5b	18.87	9.26	1.09	1.6e-15
Kng1	1.13	0.56	1.09	6.8e-03
Rxrg	41.26	19.97	1.09	1.0e-21
Armc12	0.71	0.37	1.09	2.7e-02
Ajap1	92.78	43.71	1.09	8.4e-41
Ap1m2	0.54	0.25	1.08	4.1e-02
Epha5	843.85	399.75	1.08	1.1e-28
Prr16	318.08	154.62	1.08	1.0e-20
Smpdl3b	20.48	9.57	1.08	7.4e-13
Zmat4	299.42	147.31	1.08	1.2e-26
Aurkc	0.78	0.36	1.08	6.0e-03
Khdrbs2	675.95	321.7	1.08	2.3e-35
Ryr2	509.81	241.32	1.08	1.6e-63
Fbxo43	0.72	0.33	1.07	2.2e-02
Baiap2	144.35	68.77	1.07	9.8e-74
E2f7	1.48	0.72	1.07	8.8e-03
Mcm10	4.21	1.98	1.06	2.8e-07
Taf7l	38.12	18.09	1.06	2.3e-28
Cyp2c55	1.39	0.69	1.06	9.6e-04
6820408C15Rik	23.1	11.22	1.06	9.5e-21
Ptpn3	42.04	21.25	1.05	5.5e-18
Plekhg4	5.68	2.72	1.05	9.5e-10
Tmem145	185.47	89.4	1.05	1.6e-40
Mkx	33.28	16.56	1.05	2.6e-08
Camkk2	106.89	51.7	1.05	3.5e-111
Rab26	74.43	37.31	1.05	6.0e-35
Ptk2b	25.91	13.46	1.05	1.4e-05
Celf2	1544.93	751.93	1.05	8.5e-93
Tekt5	10.48	5.52	1.05	1.3e-07
Macrod2os2	0.89	0.5	1.04	3.2e-02
A830092H15Rik	20.1	9.82	1.04	5.3e-15
Ddn	9.2	4.76	1.04	1.1e-06
Lrit3	1.4	0.66	1.03	4.5e-03
Grm7	1889.06	936.2	1.03	1.2e-54
9530026P05Rik	254	122.07	1.03	4.2e-34
Gria3	516.69	250.2	1.03	1.7e-69
C130026L21Rik	43.59	21.42	1.03	3.8e-19
Lhfpl3	1079.17	533.02	1.03	2.0e-49
Myo5c	3.47	1.69	1.03	5.6e-06
Dcdc2c	2.32	1.21	1.03	1.7e-05
Galnt14	90.02	43.62	1.03	1.1e-24
Deptor	147.69	72.98	1.03	5.8e-45
Nell2	261	129.17	1.03	1.8e-30
Runx2os1	3.13	1.57	1.02	1.9e-05
Tmem163	204.66	97.75	1.02	5.6e-23
Ano3	79.74	39.1	1.02	2.6e-47
Pde6a	23.31	11.76	1.02	1.2e-22
Robo3	1.68	0.71	1.02	3.3e-02
Nrg3	4763.08	2389.23	1.02	7.4e-34
A630075F10Rik	1.58	0.76	1.02	4.5e-04
Etnk2	49.87	23.11	1.02	4.6e-13
Grm8	564.39	282.13	1.02	5.2e-44
Pde8b	382.49	190.4	1.01	2.1e-85
Wnt5a	16.53	8.27	1.01	3.3e-14
Fam126a	77.91	38.73	1.01	2.7e-41
Cdh6	97.36	48.12	1.01	2.2e-37
Spink13	10.69	5.13	1.01	1.3e-10
Prkg1	1506.33	762.7	1.01	1.9e-49
Rgsl1	3.41	1.68	1.01	3.3e-06
A330102I10Rik	163.11	85.93	1.01	9.8e-15
Nab2	11.92	5.93	1.01	7.2e-13
Syt7	105.88	53.35	1.01	9.8e-35
BC016579	3.14	1.59	1.01	5.4e-05
Nr2f2	138.11	68.1	1.01	7.9e-50
Setdb2	18.82	9.06	1.01	1.2e-15
Atrnl1	314.02	158.42	1	2.3e-55
Fhod3	204.17	103.37	1	3.7e-39
Cntn6	343.77	171.49	1	1.0e-20
Rtp4	12.31	6.51	1	1.1e-05
Kcnmb4os2	9.74	4.94	1	5.2e-18
Lingo2	3733.16	1907.72	1	8.3e-43
Nrg3os	550.66	279.18	1	3.3e-30
Slc16a11	171.92	89.33	1	3.0e-34
4930587E11Rik	56.16	28.54	0.99	8.8e-10
Krt77	6.16	3.47	0.99	5.6e-08
Syt9	90.42	45.56	0.99	9.8e-55
Asb12	2.6	1.29	0.99	9.6e-05
1700125G02Rik	4.21	2.23	0.99	5.9e-08
E330017L17Rik	1.13	0.56	0.99	3.2e-03
Fstl3	5.57	2.88	0.98	8.1e-10
Cacna1h	45.76	23.13	0.98	1.8e-40
Vmn2r54	0.95	0.48	0.98	1.3e-02
Htr4	85.18	44.11	0.98	1.3e-16
Prlr	96.18	48.99	0.97	1.3e-30
Nox4	18.6	9.7	0.97	1.2e-05
Hsd17b14	1.48	0.69	0.97	3.9e-03
Cacna1e	608.9	312.31	0.97	2.8e-76
Cfi	1.56	0.81	0.97	1.2e-03
Aanat	11.64	6.05	0.97	3.7e-15
Robo2	416.62	210.76	0.97	2.0e-31
Gabrb3	1106.83	572.57	0.97	2.7e-69
Mc4r	1.83	0.92	0.97	8.5e-04
Slc4a11	2.03	1	0.97	3.6e-04
Il1rapl1	2706.88	1398.3	0.97	5.8e-84
Efcc1	17.85	9.35	0.97	4.3e-22
Idi2	0.76	0.41	0.97	1.9e-02
A930003O13Rik	4.62	2.37	0.97	3.7e-10
Rps6ka2	180.29	92.33	0.97	2.6e-102
Lrfn2	198.07	103.98	0.97	2.6e-52
Oxtr	3.78	2.06	0.97	1.3e-04
Vmn2r87	47.3	24.28	0.97	2.1e-24
Myo1b	43.71	22.48	0.96	4.1e-40
Tmem213	1.06	0.56	0.96	7.2e-03
Kcnmb4	40.75	20.77	0.96	1.4e-32
Tenm4	824.15	427.26	0.96	2.9e-25
Angpt4	2.6	1.38	0.96	4.6e-04
Rnf182	53.91	27.48	0.96	2.0e-32
3110009E18Rik	17.89	8.63	0.96	2.9e-09
Grik4	278.88	142.97	0.96	5.7e-54
Ildr1	2.9	1.56	0.96	5.1e-06
Cavin4	14.8	7.43	0.96	1.9e-10
Pcsk2os2	19.09	9.82	0.95	6.7e-17
Pcsk2os1	38.64	19.93	0.95	2.8e-34
Prkd1	204.38	103.73	0.95	1.2e-21
Gldnos	2.44	1.27	0.95	5.6e-04
Egr4	5.59	3.11	0.95	2.4e-05
Chst13	0.71	0.33	0.95	3.9e-02
Dpysl4	54.62	28.29	0.95	1.3e-37
Pde3a	30.97	15.8	0.95	2.2e-10
4933432K03Rik	4.03	2.11	0.95	2.6e-08
4930447M23Rik	1.28	0.65	0.95	1.1e-02
Nlgn1	3740.33	1947.03	0.95	5.5e-44
Plch2	22.11	11.69	0.94	8.7e-12
Lamb3	16.09	8.57	0.94	5.4e-11
Pcdh15	1596.65	847.35	0.94	8.2e-24
Rbfox3	352.47	182.4	0.94	2.7e-78
Kdr	2.67	1.73	0.94	3.1e-02
Large1	730.2	381.75	0.94	9.0e-104
Tmem200a	63.5	33.55	0.94	1.3e-31
Gpr165	25.05	13.08	0.94	7.4e-19
Btbd16	9.53	5.15	0.94	7.3e-13
Gas2	103.01	54.29	0.94	7.6e-37
Rab11fip1	7.69	3.97	0.93	1.4e-12
4930532I03Rik	40.78	22.24	0.93	1.0e-16
Cacna1i	50.79	26.94	0.93	7.5e-36
Cntnap5b	410.72	217.93	0.93	6.2e-21
1700122H20Rik	2.29	1.24	0.93	4.2e-03
Sel1l3	38.63	20.23	0.93	2.3e-26
Cyp2s1	5.65	3.04	0.93	1.3e-10
Atoh7	7.2	4.02	0.93	7.9e-12
Tmem215	6.42	3.84	0.93	2.4e-05
Cntn4	809.76	434.44	0.93	2.3e-18
A530016L24Rik	3.43	1.81	0.93	3.3e-05
Pvt1	199.91	105.69	0.92	1.2e-30
Matk	334.5	179.83	0.92	1.6e-44
Zfp985	0.82	0.44	0.92	1.7e-02
Grhl1	21.62	11.34	0.92	8.8e-26
Tgm3	2.15	1.17	0.92	4.8e-04
Sorcs3	433.09	234.59	0.92	5.3e-39
Amigo2	36.34	21.63	0.92	5.3e-10
Flrt2	141.15	74.29	0.91	4.2e-17
Shisa9	332.27	170.45	0.91	3.0e-35
Tpo	8.16	4.44	0.91	6.2e-09
Fate1	1.02	0.6	0.91	1.6e-02
Fam81a	43.99	23.75	0.91	4.3e-20
Dlgap2	580.73	314.48	0.91	7.8e-68
Slc39a2	5.67	3.03	0.91	1.6e-08
C230057M02Rik	6.06	3.43	0.91	8.1e-08
Ephb1	201.46	108.23	0.9	7.2e-17
Tmem191c	287.82	153.89	0.9	8.9e-49
Atp4a	3.22	1.89	0.9	2.1e-04
Noxred1	8.04	4.26	0.9	5.9e-12
Ppfia2	653.53	354	0.9	2.1e-34
Mir124a-1hg	132.42	71.9	0.9	1.6e-23
Fosb	2.4	1.44	0.9	4.3e-02
9130204K15Rik	2.24	1.16	0.9	1.4e-04
Drp2	43.61	23.47	0.9	5.7e-27
Susd2	21.64	12.07	0.9	2.3e-21
Iqgap2	57.25	31.07	0.9	1.1e-20
4930502E18Rik	0.91	0.5	0.9	2.8e-02
St6galnac5	136.35	75.55	0.9	1.9e-18
Kcnh1	142.5	76.96	0.89	1.6e-40
Slit2	466.01	254.08	0.89	1.2e-20
Shisa7	75.7	40.63	0.89	6.1e-42
Dpyd	371.47	202.93	0.89	1.2e-41
Slc30a8	1.28	0.75	0.89	2.2e-02
C230021G24Rik	0.9	0.51	0.89	1.5e-02
Slc9b1	7.52	4.2	0.89	2.0e-05
C1ql2	24.34	13.77	0.89	3.4e-09
Adgrg4	13.46	6.62	0.89	1.4e-05
Pebp4	7.26	3.9	0.89	6.7e-08
Ank3	2495.61	1370.11	0.89	4.5e-43
9630041A04Rik	7.25	3.96	0.88	7.6e-07
Sult2b1	6.68	3.62	0.88	6.4e-10
Epsti1	9	5.01	0.88	1.3e-08
4933406B17Rik	6.66	3.84	0.88	3.7e-05
Adamts17	102.17	55.37	0.88	8.1e-33
Icam5	34.07	18.99	0.88	6.4e-14
Faah	60.76	33.33	0.88	2.7e-52
Ptprd	3780.2	2078.41	0.88	9.8e-35
Tmem266	49.42	26.54	0.88	2.7e-14
Sdr42e1	17.37	9.63	0.88	1.7e-23
Rad18	39.25	21.62	0.88	1.3e-32
Evpl	15.85	8.53	0.88	1.7e-22
4930563I02Rik	1.12	0.62	0.88	1.1e-02
Runx2	75.26	40.9	0.88	1.1e-21
Gabra2	469.97	256.25	0.87	7.8e-41
4930555F03Rik	461.82	257.64	0.87	3.2e-27
Sept11	116.37	63.84	0.87	5.0e-58
Vmn2r56	3.92	2.12	0.87	5.4e-07
Apobec4	91.72	50.56	0.87	1.2e-45
Sh3rf3	134.19	75.07	0.87	2.6e-29
Zim1	94.17	52.3	0.87	7.2e-27
Slc36a3	0.64	0.37	0.87	4.9e-02
Gtf2a1l	2.12	1.15	0.87	1.1e-03
Sema5a	138.9	76.12	0.87	1.5e-26
Il5ra	2.02	1.13	0.87	1.3e-03
Insl5	5.39	3.05	0.87	6.3e-08
Card14	0.9	0.48	0.87	3.5e-02
1700094M23Rik	3.37	1.84	0.86	1.1e-05
Susd4	217.25	119.43	0.86	2.5e-79
Zdhhc2	210.18	115.44	0.86	4.4e-30
Kcnn3	126.18	69.98	0.86	1.9e-50
Pdzrn4	623.92	340.73	0.86	4.0e-40
C130073E24Rik	530.51	296.86	0.86	1.7e-23
Shcbp1l	12.09	6.68	0.86	4.7e-18
Cemip	47.56	26.82	0.86	5.5e-09
Eqtn	2.53	1.47	0.86	2.3e-03
Msln	2.93	1.59	0.86	1.1e-04
9130409I23Rik	1.36	0.73	0.86	4.3e-02
Npnt	12.14	6.67	0.86	2.1e-06
4732496C06Rik	8.29	4.64	0.86	2.2e-09
Astn2	1032.91	571.15	0.86	1.8e-63
Serpina10	1.5	0.84	0.86	8.8e-03
Rnd3	47.12	26.06	0.86	9.7e-22
Klhl31	1.29	0.7	0.86	8.3e-03
Rasl11a	7.62	4.62	0.85	2.7e-05
Slc25a30	15.63	8.74	0.85	1.7e-23
Bpifc	1.56	0.85	0.85	3.6e-03
Gpr119	1.81	1.09	0.85	1.7e-03
Lrrd1	7.87	4.61	0.85	2.5e-09
Ccdc169	1.56	0.9	0.85	4.4e-03
Olfr691	4.46	2.52	0.85	1.4e-06
4921539E11Rik	3.07	1.81	0.85	2.8e-04
Kcnk4	5.59	3.23	0.85	2.6e-06
Ptch2	18.33	10.32	0.85	6.2e-12
Myrip	103.85	58.47	0.85	9.1e-38
Ppm1e	393.34	219.67	0.85	2.9e-35
Fam155a	2728.65	1533.14	0.84	1.9e-57
Gfral	2.27	1.22	0.84	2.2e-03
Npm2	6.71	3.55	0.84	9.2e-06
A630023P12Rik	4.61	2.41	0.84	3.7e-06
Ddx4	3.16	1.73	0.84	1.6e-04
Mylk4	3.82	2.11	0.84	8.9e-05
Ptchd4	223.55	126.4	0.84	5.6e-37
Plcxd3	333.8	188.02	0.84	3.6e-28
Gsg1	6.87	3.88	0.84	1.2e-08
Ttc23l	1.47	0.77	0.83	1.1e-02
1700034H15Rik	9.12	5.15	0.83	4.7e-09
Galnt13	722.23	404.9	0.83	4.0e-26
Sgpp2	38.75	22.43	0.83	1.0e-11
Teddm2	10.09	5.48	0.83	1.5e-05
Atp2c2	3.92	2.21	0.83	1.1e-05
Wdr95	19.28	11.25	0.83	6.9e-11
Pdlim7	183.79	105.58	0.83	7.1e-59
Gpr26	17.13	9.58	0.83	7.1e-12
Kif26b	168.63	96.09	0.83	1.1e-28
Npffr1	31.31	18.35	0.83	7.0e-17
Vwa5b2	157.97	90.98	0.83	1.2e-26
Trank1	245.53	139.02	0.83	1.0e-39
Pcnx2	136.01	78.33	0.83	4.9e-32
Krt24	1.38	0.8	0.83	2.2e-02
Grem2	33.59	18.88	0.83	1.7e-15
Asprv1	0.91	0.48	0.83	4.8e-02
Il16	5.08	2.89	0.83	5.9e-04
Lrp1b	3394.75	1941.24	0.83	4.6e-23
Grin1os	19.26	10.96	0.83	4.0e-16
4930513D17Rik	7.14	4.08	0.82	3.7e-11
Nrgn	79.33	46.49	0.82	3.5e-12
Terb2	0.82	0.45	0.82	3.5e-02
Rnf112	141.49	81.01	0.82	1.1e-51
Dusp23	17.03	9.64	0.82	5.4e-20
Abca17	7.5	4.35	0.82	4.1e-09
Slit1	130.9	74.81	0.82	6.5e-21
Unc79	412.2	235.13	0.82	3.7e-40
4933412O06Rik	25.45	14.75	0.82	7.1e-15
Olfr1564	2.59	1.53	0.82	6.6e-04
Slc27a2	28.2	16.16	0.82	1.4e-18
Plxdc1	52.67	29.75	0.82	5.4e-31
D430041D05Rik	277.19	158.97	0.82	2.1e-47
Sorbs2os	170.34	99.91	0.82	4.9e-28
Hhipl2	1.41	0.75	0.82	1.8e-02
Olfr690	5.45	3.06	0.81	2.7e-06
Myt1l	718.33	414.02	0.81	7.1e-40
Nptx1	36.1	20.64	0.81	2.3e-08
Cacna1c	663.89	384	0.81	1.2e-39
Ripor2	152.98	89.34	0.81	1.1e-21
Rsph6a	1.25	0.72	0.81	3.4e-02
Vill	4.41	2.57	0.81	4.6e-06
BC018473	4.16	2.6	0.81	1.7e-03
Ctnna2	2239.07	1281.4	0.81	2.4e-30
Grin1	467.71	270.46	0.81	1.6e-44
Dgkb	1183.51	680.42	0.81	1.2e-26
Ar	109.83	62.36	0.81	4.1e-27
Slc9a2	10.13	5.97	0.81	1.0e-05
C6	2.36	1.21	0.81	4.6e-03
Ttc39c	60.19	34.12	0.81	1.7e-29
A530046M15Rik	24.15	13.66	0.81	7.4e-12
Pdgfc	59.87	34.29	0.81	2.0e-37
Mmp9	2.2	1.26	0.81	1.4e-03
1700093K21Rik	3.29	1.94	0.81	7.1e-04
Tmem91	213.88	123.25	0.81	6.8e-27
Ncam2	1222.75	701.05	0.8	1.8e-24
Klhl3	121.29	70.12	0.8	2.7e-56
March11	56.81	33.14	0.8	8.0e-34
Nanos2	0.95	0.51	0.8	3.7e-02
Slc9a5	32.95	19.53	0.8	3.0e-28
2010300C02Rik	61.9	35.71	0.8	4.0e-39
Fgf9	23.42	13.59	0.8	4.6e-17
Prss12	6.47	3.64	0.8	9.4e-07
Marveld2	7.66	4.38	0.8	2.6e-09
Lrrfip1	226.52	131.74	0.8	1.6e-47
Cers3	1.24	0.71	0.8	1.9e-02
Hecw1	355.87	209.23	0.8	7.5e-24
Sidt1	102.27	59.6	0.8	1.6e-24
Morc2b	14.11	8.14	0.8	5.4e-08
Tmem108	487.11	281.78	0.79	9.2e-114
Gpr83	20.89	13.37	0.79	8.4e-07
Zfp459	2.29	1.41	0.79	2.7e-03
Rprml	16.26	9.84	0.79	8.0e-08
4933424L21Rik	4.3	2.48	0.79	3.0e-05
Cabyr	9.82	5.51	0.79	4.9e-08
A730090N16Rik	7.2	4.17	0.79	2.0e-09
Napepld	34.63	19.98	0.79	9.5e-17
Cstad	4.73	2.74	0.79	1.8e-05
Gpr39	6.32	3.81	0.79	3.8e-08
Slc7a6	150.78	87.97	0.79	1.9e-37
Rhbdl3	75.11	44.17	0.79	9.0e-28
H2-T22	27.46	15.84	0.79	1.5e-10
Panct2	4.68	2.82	0.79	2.6e-05
Dlk2	53.21	30.85	0.79	1.2e-26
Mboat4	1.52	0.96	0.79	2.3e-02
Enox1	450.9	263.52	0.79	5.2e-70
Acp1	314.79	180.99	0.79	2.4e-45
5330439A09Rik	5.9	3.52	0.79	7.9e-07
1700003L19Rik	1.84	1.08	0.78	7.8e-03
Isyna1	70.19	43.15	0.78	2.1e-23
Tshz2	652.07	378.82	0.78	1.8e-26
Clca3a1	8.42	5.14	0.78	6.3e-06
Lzts1	23.29	13.74	0.78	4.3e-15
Tmem30c	3.05	1.73	0.78	2.2e-04
Prickle1	469.11	277.2	0.78	1.1e-21
Slc8a2	61.3	35.2	0.78	6.1e-19
Stard9	179.07	102.1	0.78	9.5e-39
Nfkbid	6.27	3.63	0.78	2.8e-06
Tle2	61.07	35.12	0.78	1.9e-32
Slc9a3	2.99	1.78	0.78	2.7e-04
Msh3	84.55	49.34	0.78	4.3e-51
AB041806	9.68	5.81	0.78	1.4e-08
Amz1	29.57	17.09	0.78	1.5e-11
Epha10	92.68	57.12	0.78	1.2e-10
Acmsd	1.43	0.82	0.78	9.1e-03
Arhgap33os	25.18	14.89	0.78	1.1e-07
Slc1a6	61.88	36.88	0.78	2.0e-14
Il4	7.6	4.43	0.77	3.8e-09
Zfyve28	75.6	44.8	0.77	3.3e-40
Cdca7l	5.58	3.29	0.77	1.5e-03
Hsd3b3	3.96	2.34	0.77	1.1e-05
Trpv6	1.56	0.94	0.77	5.2e-03
Pfkfb4	92.27	53.95	0.77	1.0e-72
Aven	44.55	26.41	0.77	9.4e-18
Cntnap5a	925.8	546.65	0.77	1.4e-20
9330198N18Rik	19.77	11.59	0.77	7.3e-17
4930486F22Rik	7.72	4.78	0.77	6.6e-06
C530008M17Rik	408.52	243.05	0.77	2.4e-52
Atp10a	51.55	31.08	0.77	3.0e-13
1700034I23Rik	1.55	0.9	0.77	1.6e-02
Plxna2	127.43	74.3	0.77	8.9e-23
Csmd1	2482.73	1481.92	0.77	5.8e-22
E130006D01Rik	4.69	2.77	0.76	4.8e-04
Flnb	174.42	102.75	0.76	3.3e-37
Neto1	99.15	58.37	0.76	1.2e-25
Tmeff1	129.54	76.01	0.76	1.9e-31
B830012L14Rik	39.62	23.91	0.76	3.4e-17
Chn1os1	1.27	0.7	0.76	2.9e-02
Mtus2	211.05	127.25	0.76	2.2e-18
Meg3	15057.15	8798.64	0.76	1.2e-15
Syt16	290.45	173.78	0.76	4.8e-31
Pcsk2	524.64	307.28	0.76	2.8e-24
Gpr88	9.92	6.53	0.76	4.7e-05
Lancl3	23.71	14.08	0.76	1.4e-08
Olfr239	6.71	4.02	0.76	2.7e-07
Slitrk5	53.29	31.86	0.76	1.2e-45
Sytl5	23.35	13.65	0.76	3.3e-11
Cdhr2	6.82	4.1	0.76	1.0e-07
Grem1	7.31	4.4	0.75	2.7e-08
Tagap	7.3	4.19	0.75	1.0e-03
Nmur2	36.4	22.24	0.75	1.2e-19
4930428E07Rik	26.79	16.64	0.75	1.7e-14
Tpbg	31.48	19.62	0.75	6.7e-13
Ghrl	0.88	0.51	0.75	4.9e-02
Zfp46	21.47	12.52	0.75	5.9e-18
Pitpnm3	72.93	43.34	0.75	1.9e-21
Abcc8	26.27	16.04	0.75	9.3e-16
Adamts19	10.92	6.65	0.75	1.4e-04
Fyb2	15.65	9.35	0.75	2.1e-09
Megf6	23.96	14.45	0.75	1.0e-09
D930020B18Rik	13.44	7.72	0.75	1.6e-11
Oaz3	8.63	5.18	0.75	3.8e-07
Cstf2	94.49	56.33	0.75	1.1e-30
Nphp4	52.2	31.38	0.75	3.9e-30
Hsd3b2	1.79	1.08	0.75	1.1e-02
Tex45	1.7	1.09	0.75	1.8e-02
Map3k5	126.68	75.32	0.74	2.3e-35
Plcxd2	33.84	19.92	0.74	3.5e-15
Samd15	17.37	10.61	0.74	6.8e-18
Hecw2	347.54	213.09	0.74	6.6e-19
Smco4	17.3	10.59	0.74	6.3e-10
Celf5	167.7	100.68	0.74	4.2e-56
Tmco5	1	0.58	0.74	4.7e-02
Gstm2	1.18	0.79	0.74	3.0e-02
9430097D07Rik	0.95	0.57	0.74	3.3e-02
Coro2a	61.94	37.87	0.74	2.3e-28
Col26a1	36.55	22.83	0.74	2.3e-13
1700084F23Rik	3.01	1.9	0.74	5.9e-04
Prx	6.6	4.12	0.74	4.9e-06
Fgfr1	104.92	63.71	0.74	8.5e-27
Adarb2	473.61	289.43	0.74	2.7e-07
Kifc2	170.36	104.48	0.74	1.7e-34
Tmem132a	61.93	37.02	0.73	4.7e-18
Rreb1	140.62	85.05	0.73	1.7e-08
Stxbp2	16.26	9.81	0.73	4.7e-12
Efcab6	19.59	11.93	0.73	2.2e-08
Hdac7	132.99	80.55	0.73	2.6e-73
Mctp1	253.28	155.72	0.73	1.3e-16
4932413F04Rik	4.66	2.75	0.73	9.1e-06
Smpd4	38.04	23.21	0.73	8.4e-28
Hao2	1.24	0.82	0.73	3.3e-02
Pam	698.14	422.57	0.73	2.9e-31
Gabrb1	1539.82	933.34	0.73	1.5e-34
Cntnap4	222.56	135.12	0.73	8.3e-11
Hfm1	30.19	18.87	0.73	1.3e-10
Rasgef1a	154.92	94.19	0.73	4.4e-60
Slitrk6	5.09	3.04	0.73	1.0e-04
Gpr12	10.36	6.6	0.73	1.3e-07
Plcb4	331.43	202.48	0.73	5.5e-31
Ckmt2	10.27	6.26	0.73	5.0e-10
A1cf	4.22	2.43	0.73	3.8e-04
Togaram2	41.71	25.83	0.73	6.6e-10
Larp1b	97.25	59.32	0.72	4.1e-25
Lamc2	2.44	1.58	0.72	2.1e-03
Olfr55	4.37	2.67	0.72	2.3e-04
Cabp1	39.72	24.66	0.72	2.6e-16
Arntl2	71.19	43.32	0.72	4.3e-24
Igsf21	48.04	29.27	0.72	3.2e-21
Dab1	1364.71	829.81	0.72	5.8e-85
A330015K06Rik	80.93	49.4	0.72	9.4e-13
Sec14l3	1.67	1.06	0.72	1.2e-02
C230004F18Rik	527.62	323.53	0.72	5.5e-25
R3hdm1	550.67	335.07	0.72	3.9e-47
Erc2	822.94	501.45	0.72	6.2e-29
Il34	36.37	22.68	0.72	3.3e-20
Spats2l	111.53	68.04	0.72	1.4e-11
Cdr1	4.43	2.82	0.72	1.3e-04
Unc5a	38.94	23.25	0.72	3.9e-12
Nmu	2.98	1.95	0.72	4.9e-02
Ccdc157	44.37	26.87	0.72	4.9e-20
Zdhhc23	13.86	8.44	0.72	2.6e-14
Ntng1	381.04	232.97	0.72	5.5e-07
Xk	16.76	10.09	0.71	2.2e-12
Usp29	1255.53	779.96	0.71	3.2e-27
Tmcc3	532.1	328.32	0.71	2.7e-13
Olfr689	1.22	0.79	0.71	3.3e-02
Gria1	993.13	608.45	0.71	2.8e-77
C1qtnf12	25.94	16.59	0.71	3.0e-15
Adgrl3	1607.3	987.57	0.71	1.4e-46
Cpne6	51.19	31.09	0.71	7.5e-33
Armc9	273.68	168.39	0.71	2.9e-40
Mfap3l	47.42	28.77	0.71	2.7e-22
Scn1a	282.73	174.53	0.71	2.6e-21
Pdk3	33.52	20.63	0.71	1.2e-23
Gipc2	22.49	14.02	0.71	1.5e-13
Fam71d	12.89	8.06	0.71	1.0e-10
Gpr82	2.36	1.48	0.71	5.4e-03
Rrh	2.68	1.57	0.71	1.8e-03
Kcnv1	5.12	3.21	0.71	6.3e-04
Rab36	109.4	66.15	0.71	5.6e-31
1700121C08Rik	4.24	2.64	0.71	3.4e-04
Atp1a4	2.37	1.61	0.71	1.3e-02
Sh3gl3	109.01	66.14	0.71	5.6e-17
Syt1	1762.67	1080.56	0.71	5.6e-26
Crhr2	10.8	6.3	0.71	1.3e-06
Tomm6os	1.08	0.68	0.71	3.0e-02
Zmynd10	14.58	9.56	0.71	9.2e-08
B430218F22Rik	0.99	0.65	0.71	4.6e-02
Cerkl	10.12	6.1	0.7	4.1e-05
Fgf12	880.13	536.65	0.7	3.1e-33
Sox5os2	16.23	10.1	0.7	1.6e-14
B230307C23Rik	43.51	27.08	0.7	3.8e-31
Atp6ap1l	2.78	1.88	0.7	3.0e-03
Bcl11a	85.37	52.76	0.7	4.4e-09
Ppp3ca	900.73	555.94	0.7	9.5e-82
Elfn1	20.55	12.6	0.7	6.4e-13
Klhl14	5.69	3.69	0.7	1.3e-02
9330198I05Rik	1.21	0.75	0.7	3.4e-02
Lyrm9	39.49	24.81	0.7	5.1e-23
Spata4	1.27	0.75	0.7	3.8e-02
Plxna4os3	22.68	14.58	0.7	8.9e-11
Meiob	2.11	1.39	0.7	3.9e-03
Polr3g	13.21	8.13	0.7	1.0e-10
Dnajc5b	1.96	1.31	0.7	2.0e-02
Fig4	57.75	35.17	0.7	1.4e-29
Cacng8	89.13	55.27	0.7	1.6e-33
Abcb11	1.3	0.91	0.7	2.8e-02
Sptbn4	217.23	137.62	0.7	1.0e-26
Ust	103.7	64.41	0.7	4.0e-11
Epor	2.02	1.22	0.7	2.2e-02
Sh3gl2	215.37	130.3	0.7	7.2e-25
Mirg	290.3	181.57	0.7	1.7e-14
Cdh11	133.15	82.18	0.69	7.2e-22
Oprk1	35.06	21.76	0.69	1.4e-11
Mycn	3.49	2.31	0.69	3.2e-03
Kcna1	43.5	27.6	0.69	4.6e-08
Dnhd1	7.35	4.56	0.69	4.7e-08
Chrd	17.73	11.16	0.69	6.8e-12
Dchs2	63.22	38.73	0.69	2.3e-10
Nyap2	237.58	149.89	0.69	6.3e-29
Osbpl6	431.52	271.26	0.69	2.4e-33
Dapk1	257.82	160.76	0.69	3.0e-85
Tbc1d1	100.17	62.31	0.69	6.6e-67
Sorbs2	451.19	280.06	0.69	1.4e-28
Cmbl	22.86	15.02	0.69	8.4e-10
Ccdc116	3.52	2.2	0.69	1.5e-03
Unc5c	816.03	509.16	0.69	1.3e-17
Siae	28.34	17.83	0.69	3.2e-25
Clnk	15.97	10.18	0.69	1.5e-12
Rell2	69.89	43.72	0.69	2.2e-44
Muc16	3.7	2.3	0.68	9.7e-05
Mmp17	26.99	16.98	0.68	9.9e-18
Tango2	218.53	137.55	0.68	1.5e-41
Mpp4	5.6	3.57	0.68	1.1e-05
Slc7a14	165.14	103.01	0.68	1.1e-18
Ablim2	203.97	127.17	0.68	7.1e-30
2310030G06Rik	5.3	3.33	0.68	3.0e-05
Car11	86.03	54.71	0.68	7.9e-25
Dffb	47.62	29.44	0.68	7.1e-17
Fam196b	52.78	33.55	0.68	2.4e-12
Thsd7b	246.67	158.06	0.68	2.8e-08
Gssos1	2	1.28	0.68	1.2e-02
C78859	52.13	33.45	0.68	1.0e-10
Nexn	29.22	18.47	0.68	5.1e-08
Ltbp1	18.77	10.9	0.68	1.2e-04
Myoz3	2.16	1.13	0.68	2.0e-02
Impdh1	52.88	33.18	0.68	4.5e-21
Csmd3	1712.07	1088	0.68	1.0e-17
Hs3st5	256.17	160.1	0.68	4.4e-08
Pate2	48.83	30.31	0.68	6.1e-17
Tiam1	126.01	78.55	0.68	8.1e-30
Kcnq5	617.86	383.3	0.68	1.1e-09
Gabrb2	222.69	141.63	0.68	7.2e-13
Plcz1	3.27	2.1	0.68	9.7e-04
1700016K05Rik	12.32	7.71	0.68	4.4e-11
Aff3	264.36	166.28	0.68	5.5e-19
Nmbr	3.76	2.42	0.67	4.1e-03
Cenpi	2.15	1.29	0.67	6.0e-03
Igsf9b	122.61	76.99	0.67	9.1e-24
Slco4c1	9.37	6	0.67	5.7e-06
Carmil3	90.47	57.26	0.67	6.6e-28
Mlip	19.54	12.46	0.67	3.0e-07
Pip5kl1	11.73	7.34	0.67	1.3e-06
Zdhhc1	128.82	80.69	0.67	3.7e-29
Vstm2a	76.69	48.22	0.67	6.0e-14
Kcnab1	153.49	95.11	0.67	1.7e-20
Prkce	454.58	287.27	0.67	1.8e-48
Stxbp5l	427.63	273.27	0.67	7.5e-24
Hrh1	29.4	18.43	0.67	2.3e-11
Kcnh3	4.28	2.59	0.67	1.0e-03
A230006K03Rik	526.95	342.08	0.67	1.5e-11
Chrna4	7.34	4.58	0.67	2.7e-05
Card9	4.03	2.49	0.67	6.5e-04
Calb1	183.49	126.65	0.67	4.8e-08
C530050E15Rik	5.26	3.44	0.67	2.2e-04
Crybg2	1.67	1.02	0.67	2.7e-02
Ltk	18.69	12.13	0.67	2.4e-11
B130046B21Rik	13.17	8.25	0.67	1.7e-07
Tbc1d10c	2.27	1.47	0.67	6.6e-03
Mc3r	3.28	2.09	0.67	1.1e-02
Cacng6	1.33	0.76	0.67	4.4e-02
Mroh8	17.18	11.22	0.67	1.6e-08
Chia1	4.59	2.93	0.67	6.0e-05
Rbm24	57.75	36.32	0.66	2.0e-17
Samd11	13.93	9.34	0.66	2.4e-06
Recql4	1.82	1.08	0.66	1.6e-02
Crybb3	3.71	2.38	0.66	1.8e-04
Syt6	43.29	27.61	0.66	3.2e-11
Msc	1.74	1.1	0.66	8.6e-03
Dync1i1	450.51	285.5	0.66	3.8e-27
Tbc1d4	61.36	38.33	0.66	1.3e-18
Ubxn11	116.62	74.66	0.66	1.2e-28
Arsk	40.73	25.06	0.66	5.6e-08
Spink10	76.93	48.45	0.66	2.0e-12
Ssh3	33.59	21.49	0.66	1.6e-18
Rassf8	190.22	120.12	0.66	6.3e-33
Zim3	27.67	17.61	0.66	5.9e-11
Lsamp	7918.31	5097.31	0.66	2.2e-43
D330050G23Rik	7.3	4.64	0.66	4.4e-07
Cyp2j11	3.41	2.13	0.65	7.2e-04
Glt1d1	80.84	52.22	0.65	4.9e-21
Adgrb3	2246.05	1433.22	0.65	1.7e-31
Adcy6	35.16	22.19	0.65	9.2e-17
Rimbp2	260.1	167.88	0.65	5.8e-36
Agfg2	71.72	45.8	0.65	1.2e-13
Dpp10	842.02	547.55	0.65	1.3e-23
Sez6l	224.41	143.53	0.65	5.2e-21
Jph4	110.03	70.06	0.65	1.4e-54
Bend4	22.76	14.54	0.65	5.2e-13
Actn1	94.48	60.31	0.65	9.5e-41
Fam186b	4.83	3.06	0.65	9.4e-05
4933404O12Rik	14.89	9.79	0.65	1.4e-13
B230317F23Rik	9.15	5.94	0.65	6.0e-08
Pde6h	5.41	3.42	0.65	1.3e-04
Magi1	767.78	496.55	0.65	2.7e-34
Zmym1	92.03	57.33	0.65	5.7e-30
Cdh12	248.6	161.81	0.65	4.4e-08
Spock1	456.2	288.7	0.65	1.1e-21
Ppargc1b	72.02	46.7	0.64	9.7e-23
Rph3al	31.43	20.13	0.64	1.2e-14
Abca12	6.72	3.79	0.64	8.0e-04
Ero1lb	52.61	33.67	0.64	2.4e-35
Cntnap5c	190.23	124.01	0.64	1.5e-11
Ndfip1	404.71	261.12	0.64	1.5e-32
Olfr323	13.52	8.95	0.64	5.8e-08
Slc16a9	14.02	9.24	0.64	7.0e-06
Arg2	14.35	9.5	0.64	1.0e-10
Morn1	135.91	87.46	0.64	8.2e-43
Stx1a	64.7	41.47	0.64	4.9e-23
Frmpd4	623.8	406	0.64	2.6e-21
Ptpn12	169.48	109.52	0.64	1.4e-48
Ctdspl	144.6	94.08	0.64	1.8e-31
Adgrb2	78.84	50.85	0.64	4.1e-28
Tnfrsf4	1.41	0.88	0.64	3.9e-02
Acvr2a	95.93	61.84	0.64	1.3e-21
Itgae	14.38	8.22	0.63	2.9e-04
Mtfr2	5.21	3.31	0.63	5.3e-05
Rims4	53.9	34.41	0.63	1.5e-18
Scn3a	224.37	144.92	0.63	2.6e-21
Lrrc7	788.31	515.19	0.63	2.1e-18
Gjd2	4.54	3	0.63	5.3e-04
Tmem178b	816.69	532.63	0.63	7.4e-29
C86187	1.42	0.86	0.63	4.9e-02
Fam57a	51.12	32.93	0.63	3.1e-28
Fer1l6	1.66	1.04	0.63	1.9e-02
Kcnk10	90.39	58.89	0.63	1.5e-21
Ccdc15	25.53	16.26	0.63	4.0e-06
Snrpn	212	141.16	0.63	5.2e-07
Sh2d1a	3.5	2.28	0.63	1.5e-03
Akap12	94.46	61.53	0.63	1.6e-21
Spata9	4.63	3.12	0.63	4.5e-05
Clvs1	199.09	131.28	0.63	1.7e-13
Tunar	11.08	7.14	0.63	1.7e-07
Shh	8.73	5.82	0.63	4.6e-05
Ets2	34.95	23.91	0.62	1.5e-05
Ube3a	1614.91	1067.48	0.62	1.4e-20
Ptpn5	147.21	95.87	0.62	1.1e-20
Thpo	6.45	4.25	0.62	9.5e-05
Pbx4	89.43	58.73	0.62	4.4e-25
Ankrd55	132.37	86.99	0.62	4.3e-14
Arhgap20os	12.25	8.2	0.62	1.7e-07
Nsun7	102.11	67.4	0.62	5.2e-30
Lsmem1	4.02	2.5	0.62	6.5e-04
Fndc8	11.76	7.64	0.62	5.8e-07
Col20a1	6.15	3.94	0.62	1.6e-03
Sgcd	624.89	410.61	0.62	1.2e-28
Fam185a	45.69	29.88	0.62	2.0e-22
Cd163l1	7.55	5.02	0.62	4.1e-06
Tk1	5.89	3.83	0.62	7.8e-05
Ralgapa2	207.64	137.12	0.62	5.8e-22
Miat	223.18	145.67	0.62	7.6e-20
Drd1	5.37	3.63	0.62	6.3e-03
Slc4a10	259.51	169.47	0.62	6.4e-18
Tub	87.5	56.84	0.62	1.2e-19
A230077H06Rik	11.52	7.73	0.62	8.4e-06
Alg8	39.85	25.86	0.62	2.7e-28
Comp	2.75	1.75	0.62	5.5e-03
4921534H16Rik	60.87	41.07	0.62	1.4e-11
Grin2b	945.2	620.35	0.62	2.1e-22
Tas1r1	6.75	4.48	0.62	6.2e-06
B230209E15Rik	216.27	142.12	0.62	1.3e-37
Doc2a	24.41	16.78	0.62	4.6e-11
Tex50	47.79	31.61	0.62	3.5e-10
Slitrk3	22.93	14.84	0.62	8.4e-11
5330434G04Rik	708.62	471.08	0.62	3.3e-18
Zfp697	67.87	44.67	0.61	1.2e-34
Barx2	8.87	6.06	0.61	1.3e-03
Spata32	5.87	4.06	0.61	9.2e-04
Vmn2r55	4.1	2.77	0.61	3.1e-04
Xylb	8.41	5.46	0.61	5.5e-07
Pbk	9.31	6.2	0.61	1.6e-03
Rimkla	24.8	16.45	0.61	9.2e-15
Thrb	316.68	208.32	0.61	1.3e-24
Lynx1	108.07	70.76	0.61	3.3e-24
Slitrk1	70.26	46.46	0.61	1.1e-20
Exd2	91.58	60.16	0.61	1.9e-20
Pdzd4	292.48	194.78	0.61	2.3e-22
Rgs7	465.37	309.41	0.61	6.2e-23
Ptprg	483.57	317.86	0.61	2.3e-39
Trcg1	3.79	2.48	0.61	5.3e-03
Pm20d2	6.79	4.35	0.61	2.6e-05
Catsperd	13.4	8.97	0.61	1.6e-07
Malt1	49.4	32.22	0.61	2.3e-16
Fam71f2	2.32	1.44	0.61	1.0e-02
Sema4f	35.17	23.65	0.61	1.8e-10
Tmem63c	79.56	53.02	0.61	3.2e-23
Cbln1	27.37	18.26	0.61	5.9e-05
Tmprss15	6.21	4.02	0.61	9.2e-05
Gabrg2	216.1	144.68	0.61	1.4e-12
Tmc4	41.47	27.21	0.61	1.1e-21
Camk2b	225.66	149.16	0.61	9.6e-55
Casq1	3.02	1.89	0.6	6.6e-03
Gstz1	181.78	119.78	0.6	1.0e-39
Kif28	2.13	1.21	0.6	4.8e-02
Scn8a	236.03	157.37	0.6	5.2e-21
L3mbtl4	46.99	31.61	0.6	1.1e-07
Sntg1	1073.58	723.61	0.6	7.4e-18
D10Wsu102e	68.81	44.21	0.6	2.3e-12
Hap1	462.68	314.51	0.6	2.7e-17
Gpr155	42.81	28.21	0.6	7.6e-11
Syn3	326.31	217.67	0.6	1.1e-19
Slc35f3	71.37	47.39	0.6	9.0e-28
Fgf10	28.77	19.26	0.6	2.2e-04
Kank3	23.4	14.86	0.6	1.4e-10
Ankrd13b	42.97	28.12	0.6	2.6e-21
Plxna4	339.02	226.2	0.6	1.1e-25
Cask	275.95	180.99	0.6	1.8e-25
Ccdc30	201.6	134.13	0.6	9.9e-31
Btbd19	5.64	3.58	0.6	5.6e-04
Htr7	57.23	38.21	0.6	1.4e-06
Mapk15	19.13	14.91	0.6	1.1e-03
E130304I02Rik	1.91	1.26	0.6	1.9e-02
L3mbtl1	31.95	21.32	0.6	1.1e-12
Rnf165	64.84	43.55	0.6	2.0e-22
A330069K06Rik	1.96	1.33	0.6	4.5e-02
Pwp2	14.56	9.47	0.6	1.2e-08
Mast1	102.46	68.24	0.6	9.4e-19
Prm1	2.49	1.64	0.6	1.3e-02
Clec18a	6.87	4.38	0.6	2.5e-03
Klhl5	68.28	45.5	0.6	1.6e-11
D930007P13Rik	5.92	3.86	0.6	8.2e-04
Mchr1	6.16	4.71	0.59	3.2e-03
Ccbe1	34.28	23.05	0.59	4.4e-04
Dact1	5.07	3.34	0.59	2.9e-04
Sipa1l3	146.41	92.82	0.59	1.0e-08
Zap70	6.66	4.53	0.59	3.6e-04
A830031A19Rik	3.7	2.46	0.59	1.5e-02
Cxxc4	101.04	66.98	0.59	1.5e-25
Sipa1l1	221.35	147.22	0.59	3.3e-65
Sgip1	660.26	443.03	0.59	5.8e-23
Grid2	2855.84	1912.48	0.59	1.7e-25
2410021H03Rik	8.82	5.84	0.59	2.9e-04
Grxcr1	3.67	2.41	0.59	3.0e-03
Dip2c	686.64	460.45	0.59	4.5e-56
Tmem35a	59.53	42.89	0.59	1.0e-04
Nipal2	112.51	76.24	0.59	1.1e-11
4930551O13Rik	3.92	2.59	0.59	9.4e-04
9030624G23Rik	5.99	4.12	0.59	1.5e-04
Cttnbp2	280.93	189.16	0.59	8.1e-17
Ccdc88b	4.31	3.09	0.59	9.8e-03
Scrt1	34.24	22.69	0.59	2.2e-13
Galnt16	195.54	129.87	0.59	2.8e-24
Inha	50.32	33.92	0.59	7.7e-15
B830042I05Rik	3.33	2.31	0.59	2.8e-02
B230217J21Rik	86.63	54.56	0.59	4.1e-06
Acvr1c	29.09	20.15	0.59	6.5e-06
5031415H12Rik	20.06	13.47	0.59	1.0e-12
Grb10	335	224.92	0.59	8.8e-18
Gabra4	53.51	36.03	0.59	6.2e-12
Gdpd2	33.9	22.32	0.59	3.1e-09
Cd46	86.96	58.66	0.59	2.7e-14
Fbxo41	73.15	48.9	0.59	3.4e-22
Fcor	13.07	8.94	0.58	6.5e-07
Xkr8	9.72	6.44	0.58	1.7e-08
A930019D19Rik	2.09	1.36	0.58	1.9e-02
Grm1	222.51	151.5	0.58	1.2e-08
Nrg2	198.44	133.93	0.58	5.5e-34
1700024B05Rik	40.05	26.89	0.58	2.8e-19
Grip1os2	22.76	15.55	0.58	1.1e-08
Syt13	94.83	63.62	0.58	2.0e-09
1700010I14Rik	12.44	8.33	0.58	9.3e-09
Pnma3	106.97	72.52	0.58	4.6e-35
Krt25	3.98	2.63	0.58	1.2e-02
A830082K12Rik	86.76	59.01	0.58	7.2e-14
Slc2a6	23.23	16.26	0.58	8.8e-13
Mical3	338.21	228.29	0.58	7.5e-27
Scarb1	76.05	50.53	0.58	1.8e-29
Map2	1137.05	761.45	0.58	2.4e-27
Ttc37	104.52	70.28	0.58	1.9e-28
Cdon	32.94	22.18	0.58	1.1e-16
Proser2	5.68	3.77	0.58	4.3e-04
Nbeal2	14.25	9.41	0.58	1.6e-11
Lrfn1	42.3	28.42	0.58	2.9e-21
Trmt10a	43.28	28.9	0.58	7.5e-13
Zbtb34	26.92	17.71	0.58	4.4e-13
Reps2	192.62	129.67	0.58	1.2e-23
Sorcs1	504.05	340.76	0.58	6.9e-09
Eps8l1	6.3	4.27	0.58	2.3e-05
Agap2	43.45	29.32	0.58	4.7e-18
4930567K20Rik	28.35	20.13	0.58	7.6e-05
Nova1	225.18	148.92	0.58	9.4e-17
Il12rb2	7.74	5.2	0.58	2.3e-06
Clcn1	8.7	6.01	0.58	3.0e-04
Selenbp2	2.43	1.65	0.58	2.2e-02
Sfmbt2	57.65	38.62	0.58	9.7e-17
Ccdc36	5.54	3.8	0.58	1.8e-04
Klhdc10	409.96	278.11	0.58	9.0e-31
Abcg4	48.31	32.21	0.58	2.4e-21
Macrod2	1504.81	1021.22	0.57	8.0e-20
9330175M20Rik	36.26	25	0.57	5.5e-11
Cdc7	70.19	47.59	0.57	1.2e-11
Mov10l1	14.62	9.94	0.57	5.0e-08
Slc8a3	200.02	135.87	0.57	3.6e-19
Lmtk3	140.46	94.11	0.57	5.0e-28
Ethe1	25.34	17.93	0.57	3.5e-08
Shisa2	2.95	2.15	0.57	6.4e-03
Cenpn	5.18	3.35	0.57	9.3e-04
Ak5	204.51	139.17	0.57	3.6e-24
Kcnj3	288.14	193.44	0.57	1.8e-22
Slc25a23	206.99	140.1	0.57	5.5e-27
Pde1a	326.12	217.69	0.57	1.9e-15
Ccdc177	12.03	8.17	0.57	7.8e-06
Ptprm	373.05	252.86	0.57	2.1e-20
Fnbp1l	183.07	124.2	0.57	1.1e-28
Dock3	564.91	388.87	0.57	2.0e-19
Mei4	55.16	37.89	0.57	3.5e-08
Radil	77.43	52.73	0.57	1.5e-17
Slc22a22	8.4	5.32	0.57	2.6e-04
Kcnj6	156.25	106.01	0.57	6.6e-35
Aunip	2.41	1.64	0.57	1.2e-02
Gck	61.08	41.94	0.57	2.2e-13
Spocd1	3.26	2.25	0.57	1.4e-02
Svop	200.56	136.42	0.57	1.6e-45
Nemp1	28.32	19.01	0.57	1.3e-16
A430090L17Rik	18.51	12.82	0.57	4.0e-09
1700080N15Rik	60.74	43.16	0.57	3.0e-13
Pim2	74.77	50.28	0.57	3.6e-32
Usp46os1	17.12	11.71	0.57	2.5e-06
Stac3	13.04	8.99	0.57	7.3e-07
Ccdc65	21.86	15.42	0.56	6.4e-13
Eps8	96.53	64.86	0.56	4.9e-12
Dner	332.25	223.45	0.56	1.1e-17
Cdyl2	110.03	75.86	0.56	8.9e-19
Tmem132b	184.4	125.04	0.56	6.9e-19
Ulk4	115.17	78.48	0.56	1.4e-17
Greb1l	164.91	113.63	0.56	4.2e-18
Actg2	2.49	1.75	0.56	2.7e-02
2010300F17Rik	8.66	6.13	0.56	3.3e-04
Garnl3	250.72	171.9	0.56	6.0e-24
Efcab1	131.02	89.09	0.56	1.9e-21
Gabra1	140.51	95.61	0.56	1.5e-16
Prelid3a	164.83	110.89	0.56	3.4e-20
Epha4	99.86	67.58	0.56	1.8e-09
Ksr2	257.43	176.76	0.56	8.4e-10
Atg9b	22.63	15.57	0.56	9.1e-11
Ttll11	133.88	91.91	0.56	3.0e-23
Cdc42ep3	33.12	22.34	0.56	9.7e-11
Dhfr	9.61	6.48	0.56	2.4e-06
Itga4	8.05	6.01	0.56	2.5e-02
Lmnb2	17.5	12.17	0.56	3.5e-12
Lrtm1	22.43	15.45	0.56	3.2e-10
Xrra1	6.92	4.66	0.56	4.8e-06
Prim2	38.27	25.65	0.56	5.7e-24
Lrrtm1	47.6	32.84	0.56	2.8e-10
Actl6b	75.96	53.26	0.56	2.5e-22
Tspan17	59.46	40.63	0.56	5.2e-28
4930444P10Rik	27.26	18.56	0.56	2.7e-09
Trmt10b	43.71	29.67	0.56	2.6e-21
Ctif	190.49	131.58	0.56	9.5e-26
Itga11	28.92	20.06	0.56	3.6e-11
Sox5os4	68.49	48.36	0.56	6.5e-08
Hspa12a	37.31	24.82	0.56	6.2e-09
Plppr2	122.92	83.5	0.56	5.0e-22
Iqce	99.66	68.16	0.56	1.7e-38
Klhl10	47.97	32.92	0.56	6.1e-11
Nol9	28.14	19.33	0.55	1.2e-12
Ahi1	1701.88	1149.78	0.55	9.5e-16
Jakmip2	239.65	165.16	0.55	9.2e-23
Sestd1	78.44	53.97	0.55	1.5e-17
Csrnp3	393.21	269.93	0.55	2.6e-22
Ntrk3	488.07	333.75	0.55	1.9e-32
Adarb1	96.72	67.03	0.55	1.1e-18
Rgl1	156.19	106.86	0.55	6.6e-26
Coq8b	80.42	54.59	0.55	6.8e-21
Abcb6	5.31	3.66	0.55	3.3e-03
Gucy1a2	347.88	242.08	0.55	5.0e-17
Reep2	109.74	75.81	0.55	2.6e-22
Rapgef4	291.36	201.51	0.55	3.6e-25
5330417C22Rik	200.74	137.47	0.55	1.1e-16
Nek3	13.67	9.24	0.55	1.8e-10
Cenpv	141.34	97.47	0.55	1.1e-19
Fbxo10	164.08	112.02	0.55	2.9e-24
Csmd2	363.73	249.56	0.55	1.3e-32
Cdh22	112.53	77.23	0.55	1.2e-14
Shank3	111.22	77.88	0.55	7.8e-15
Rab27a	84.27	57.2	0.55	8.7e-25
Unc80	468.66	319.02	0.55	8.7e-17
4930557J02Rik	2.7	2.01	0.55	2.6e-02
4933406B15Rik	5.1	3.48	0.55	6.1e-04
Spata16	8.67	6.24	0.55	7.9e-05
Crtc1	77.78	53.37	0.55	3.0e-26
E330018M18Rik	18.29	12.96	0.55	7.1e-06
Mzf1	20.82	14.63	0.55	4.0e-09
Reep6	2.45	1.64	0.55	1.9e-02
Dennd6b	116.75	80.41	0.55	4.0e-15
Negr1	1513.42	1044.63	0.55	8.3e-20
Spata2l	10.56	7.49	0.55	9.9e-07
Add2	163.26	112.32	0.55	3.1e-19
Nrg4	20.61	14.45	0.55	5.6e-13
D830024N08Rik	150.57	106.3	0.55	8.1e-15
Prrt4	14.54	9.97	0.55	6.4e-07
Cnnm1	62.81	42.86	0.55	1.1e-22
Prickle2	517.1	358.79	0.55	2.4e-21
Shkbp1	18.73	12.9	0.55	7.0e-09
Nol4l	136.13	94.34	0.55	4.2e-29
Slc6a15	79.61	54.93	0.54	2.0e-13
Entpd3	28.14	19.23	0.54	1.6e-11
Ankrd45	63.24	43.11	0.54	3.9e-10
Eftud2	95.57	65.18	0.54	2.3e-42
Nrg1	1512.99	1099.37	0.54	2.2e-06
Pkdcc	12.14	8.35	0.54	1.4e-07
Cyp11a1	1.51	1.12	0.54	4.4e-02
Rhot2	14.15	9.69	0.54	1.8e-06
Plec	75.12	51.76	0.54	4.3e-14
Tfr2	12.29	8.48	0.54	7.2e-07
Gls	301.28	207.43	0.54	3.1e-30
Hpse2	8.87	5.71	0.54	5.1e-04
Me2	49.59	34.41	0.54	1.4e-18
Kcnip4	3850.46	2663.55	0.54	3.2e-12
Plxna1	36.16	24.86	0.54	9.4e-14
Mmaa	66.74	46.35	0.54	6.4e-17
Myc	2.88	1.94	0.54	1.5e-02
Rab40b	57.48	39.4	0.54	9.2e-26
Ackr1	15.46	10.39	0.54	6.4e-06
Fut1	5.42	3.63	0.54	2.6e-02
Syt5	122.15	90.36	0.54	1.2e-07
Acoxl	2.83	1.86	0.54	2.1e-02
1500035N22Rik	28.5	19.73	0.54	6.1e-12
Oscar	4.58	3.11	0.54	2.9e-03
Cyp46a1	81.5	57.89	0.54	2.7e-14
Tmem25	45.15	31.53	0.54	4.7e-17
5730522E02Rik	208.38	143.49	0.54	4.8e-08
Stk19	83.32	57.76	0.54	3.1e-25
Pemt	8.69	6.25	0.54	7.9e-05
Zcwpw1	6.69	4.6	0.54	1.7e-04
D130043K22Rik	140.62	96.95	0.54	9.4e-13
A230087F16Rik	26.46	18.83	0.54	3.8e-06
Alox12	1.69	1.1	0.54	5.0e-02
Zfp955a	18.37	12.78	0.54	5.8e-09
Fkbp5	64.95	48.31	0.54	2.3e-04
Cgn	35.4	24.73	0.54	1.4e-17
Tanc2	776.25	542.31	0.54	2.3e-34
Lzts3	43.79	30.48	0.54	1.5e-14
Rap2b	37.74	25.98	0.54	2.4e-05
Arhgap20	97.04	67.88	0.54	9.2e-14
Gdpd5	22.67	15.74	0.54	2.3e-08
Kcnq2	119.05	82.4	0.54	1.5e-22
Plppr3	106.5	74.32	0.54	4.0e-17
Cdh18	1034.83	725.44	0.54	3.5e-06
Vps13a	244.5	170.04	0.53	7.2e-20
Cyp4x1os	3.43	2.45	0.53	6.6e-03
C1qtnf2	2.37	1.75	0.53	2.7e-02
Macrod2os1	37.89	26.59	0.53	7.5e-07
Pole2	4.04	2.75	0.53	2.8e-02
Kalrn	596.89	412.81	0.53	4.7e-47
Kcna2	43.56	30	0.53	5.0e-16
Ppp1r13b	150.36	105.43	0.53	5.9e-17
Epb41l3	289.83	202.97	0.53	6.9e-19
Dnajc6	434.25	303.03	0.53	2.4e-17
Hook1	96.96	67.6	0.53	1.9e-11
2900026A02Rik	41.09	28.76	0.53	8.2e-10
Tnip2	49.49	33.62	0.53	1.9e-23
Slc24a3	475.25	331.03	0.53	1.8e-28
Wdr66	45.11	31.42	0.53	2.6e-07
Olfr986	2.73	1.85	0.53	3.9e-02
Marveld3	5.68	3.96	0.53	1.0e-03
Msh4	2.39	1.61	0.53	3.0e-02
Cenpu	5.21	3.59	0.53	1.7e-03
Gpr1	12.47	9.16	0.53	2.6e-04
B3galt5	48.28	33.23	0.53	6.0e-18
Susd1	46.2	32.49	0.53	1.3e-14
Lclat1	93.92	65.23	0.53	3.6e-35
Tmem132c	56.01	38.69	0.53	1.1e-08
Lonrf1	27.11	19	0.53	2.4e-11
Pkd1	161.98	113.65	0.53	4.1e-25
Grip1os3	5.99	4.25	0.53	1.3e-03
Akap7	105.04	73.25	0.53	5.5e-31
4933436I20Rik	4.72	3.32	0.53	3.5e-03
Fam135b	255.43	179.96	0.53	6.7e-18
Lmln	47.43	32.82	0.53	6.7e-13
Pgr	57.06	40.1	0.52	7.6e-08
Pde1c	105.95	74.73	0.52	1.1e-08
Kcna4	21.46	15.01	0.52	7.2e-07
Pofut1	78.34	54.23	0.52	1.9e-16
Poln	13.84	9.74	0.52	9.8e-05
Hnf1b	6.81	4.79	0.52	3.1e-04
Syngap1	40.5	28.07	0.52	6.6e-14
Dclk3	17.35	12.22	0.52	4.1e-10
Tada2a	94.99	66.66	0.52	5.5e-26
Slc26a10	4.06	2.77	0.52	4.0e-03
Lrp8	115.99	82.57	0.52	1.2e-16
Lrp8os2	47.51	33.96	0.52	3.8e-15
Cacnb3	35.1	25.13	0.52	4.6e-10
C230034O21Rik	3.28	2.24	0.52	1.3e-02
Edil3	479.96	338.84	0.52	4.8e-11
Actr3b	53.42	37.63	0.52	2.0e-13
Adam8	5.09	3.66	0.52	2.0e-04
Kcnip1	348.79	246.63	0.52	5.4e-19
Shtn1	183.03	128.91	0.52	2.7e-11
Pla2g10	2.33	1.69	0.52	2.9e-02
Aagab	55.96	39.27	0.52	9.0e-22
Ppfibp1	55.42	38.59	0.52	2.1e-08
Prkag2os1	2.94	2.2	0.52	3.3e-02
Homer1	68.82	48.36	0.52	1.1e-17
Mov10	30.55	21.32	0.52	4.0e-14
Ephb2	114.65	82.58	0.52	5.6e-11
Plxna3	26.23	18.25	0.52	4.3e-14
Iqsec2	113.6	78.96	0.52	1.6e-42
Aldob	3.24	2.27	0.52	1.3e-02
Gria2	1152.08	805.87	0.52	4.8e-16
Pdzd7	9.23	6.91	0.52	1.6e-04
Prox2os	2.64	1.85	0.52	1.8e-02
Kctd1	64.29	45.28	0.52	2.6e-13
Cfap45	19.36	13.86	0.52	1.1e-03
Cldn18	13.51	9.14	0.52	3.0e-05
5330413P13Rik	10.09	7.18	0.52	3.3e-04
Whrn	52.32	36.08	0.52	3.3e-11
March1	859.38	605	0.52	3.3e-13
4921511C10Rik	76.78	52.21	0.52	1.1e-13
Klkb1	4.27	2.94	0.52	6.0e-03
Ankrd42	66.09	46.65	0.52	1.2e-13
Ncmap	13.09	9.56	0.51	1.9e-05
4930430A15Rik	3.84	2.64	0.51	3.7e-03
Bend3	7.89	5.62	0.51	3.3e-05
Tbc1d30	34.33	24.19	0.51	7.9e-12
Rfx1	32.24	22.76	0.51	1.5e-15
Veph1	2.9	1.93	0.51	4.2e-02
Rapgef4os2	3.31	2.39	0.51	3.0e-02
Fndc9	98.09	69.39	0.51	4.2e-23
Muc3a	4.38	3.14	0.51	3.5e-03
Kcns2	4.39	3.17	0.51	1.7e-02
Cdh9	87.9	61.35	0.51	4.2e-08
Eif2b3	76.29	53.36	0.51	9.3e-34
Nin	109.12	76.68	0.51	5.6e-19
Abhd6	96.26	66.89	0.51	1.5e-29
4931440J10Rik	40.14	28.31	0.51	3.1e-14
Dcun1d2	52.21	36.81	0.51	9.6e-14
Srrm3	199.36	142.84	0.51	7.4e-17
Has1	16.48	11.93	0.51	1.6e-07
Obsl1	17.05	11.89	0.51	8.5e-11
Mblac2	151.71	107.65	0.51	9.0e-17
Scn2a	380.12	265.44	0.51	1.7e-16
Xkr6	340.43	243.35	0.51	1.3e-23
Caln1	154.52	109.51	0.51	5.0e-20
Map2k4	306.77	217.49	0.51	1.8e-25
Pigk	158.61	112.16	0.51	3.4e-17
Aloxe3	15.37	11.27	0.51	8.1e-07
Rapgef4os1	80.31	58.59	0.51	2.7e-09
Sox5os3	2.01	1.45	0.51	4.0e-02
Usp49	9.86	6.93	0.51	6.5e-07
Zmiz1os1	33.02	23.88	0.51	6.9e-10
Ankar	2.25	1.54	0.51	4.1e-02
Iglon5	39.42	28.21	0.51	3.3e-13
A830052D11Rik	4.2	2.93	0.51	2.4e-03
Nova2	121.54	85.09	0.51	6.1e-21
Adra2c	8.67	6.22	0.51	3.2e-04
Slco3a1	161.66	115	0.51	5.0e-14
5830432E09Rik	2.84	1.94	0.51	2.7e-02
Stk26	11.11	7.86	0.51	4.3e-03
Rpl12	19.63	13.47	0.5	4.9e-08
Rragd	45.47	31.91	0.5	1.2e-12
Cacna1b	315.57	226.47	0.5	2.8e-15
Lrp3	41.23	28.5	0.5	3.6e-08
Csmd2os	9.52	6.71	0.5	1.3e-05
Plppr5	74.77	53.14	0.5	2.7e-23
Rapgefl1	47.79	34.6	0.5	1.5e-18
Bbs1	23.36	16.66	0.5	2.9e-11
Tctn3	24.34	17.07	0.5	2.3e-12
P3h3	76.08	55.15	0.5	2.0e-13
Pnma1	6.66	5.12	0.5	1.4e-02
Egflam	15.11	10.76	0.5	1.0e-05
Kcnk2	233.67	166.21	0.5	3.8e-09
Ppp4r4	61.75	43.69	0.5	1.9e-12
Kcnt1	85.36	60.75	0.5	1.8e-15
Pced1b	239.77	170.57	0.5	3.9e-16
Lpcat4	27.86	20.61	0.5	1.3e-06
Bicdl1	132.22	95.59	0.5	2.6e-11
Adcy5	83.42	59.32	0.5	2.2e-22
Alpk2	3.37	2.41	0.5	7.1e-03
Celf3	209.22	148.2	0.5	6.7e-13
Sgsm3	95.28	68.67	0.5	1.5e-22
Fshr	12.87	7.97	0.5	2.4e-02
St8sia2	21.87	15.18	0.5	1.4e-03
Ldb3	23.86	17.2	0.5	5.7e-06
C2	3.69	2.68	0.5	2.8e-03
Ankfn1	173.22	123.44	0.5	2.3e-10
Jakmip1	234.32	161.77	0.5	4.7e-13
Gria4	1095.11	783.35	0.5	3.2e-17
Rap2a	79.75	56.32	0.5	1.3e-13
Chka	242.85	172.59	0.5	1.4e-18
Rnps1	125.34	88.75	0.5	6.5e-31
Ttc7	24.27	17.13	0.5	7.8e-07
Sun1	110.24	78.18	0.5	2.6e-12
Dcx	71.32	51.42	0.5	2.0e-07
Jade3	38.71	27.9	0.5	5.3e-13
Gpr171	4.2	3.02	0.5	1.9e-03
Ahr	12.67	8.91	0.5	1.9e-07
Hrh2	9.19	6.64	0.5	9.6e-04
Gprasp1	153.19	110.68	0.5	8.2e-18
4931428F04Rik	25.19	17.92	0.49	1.0e-10
Nox1	27.08	19.35	0.49	1.8e-07
Chl1	211.1	146.84	0.49	9.4e-14
Ipo11	103.9	74.41	0.49	2.9e-21
Iqcm	16.27	11.88	0.49	1.2e-07
Nav3	1113.41	799.62	0.49	2.4e-18
Tek	18.92	13.14	0.49	1.3e-04
Siah3	31.46	22.59	0.49	2.3e-11
Morc1	4.59	3.23	0.49	9.7e-04
Wscd2	99.98	70.94	0.49	5.9e-31
Tspoap1	136.13	96.17	0.49	3.7e-15
Sytl4	7.52	5.7	0.49	3.4e-02
Map6	158.21	112.72	0.49	8.6e-23
Fam126b	139.11	99.62	0.49	6.2e-15
Sergef	153	109.08	0.49	1.9e-19
Grip1	711.76	509.14	0.49	1.9e-12
Pds5b	194.33	138.97	0.49	2.3e-33
Twist2	4.02	2.92	0.49	6.6e-03
Ica1l	82.5	59.31	0.49	1.6e-10
Col28a1	3.99	2.82	0.49	9.1e-03
Nucb2	40.98	30.59	0.49	1.8e-06
Rtn4rl1	19.63	14.32	0.49	6.8e-05
Lmo4	62.06	45.03	0.49	1.2e-10
Bbs5	96.95	69.59	0.49	2.9e-17
Cmtm8	6.54	4.9	0.49	3.9e-03
Slc5a4b	9.02	6.47	0.49	1.4e-04
Rock2	220.64	158.5	0.49	3.7e-27
Prkcg	81.09	58.74	0.49	1.0e-11
Afdn	226.97	163.46	0.49	1.3e-24
Tnfrsf23	5.25	3.71	0.49	3.7e-03
Nav1	261.36	187.63	0.49	2.1e-27
Kidins220	431.35	300.91	0.49	2.0e-20
Klf5	16.61	12.15	0.49	1.7e-06
Pcolce2	43.18	30.97	0.49	5.8e-09
Optn	51.56	36.69	0.49	9.3e-17
Kcnu1	8.44	6.08	0.49	1.4e-05
Shank1	196.96	141.56	0.49	9.5e-26
A330074K22Rik	17.52	13.04	0.49	9.4e-05
Lrch1	263.23	189.31	0.49	1.6e-20
Cbx8	12.25	8.85	0.48	1.7e-05
Pde4a	87.54	63.49	0.48	6.3e-10
B3gat1	47.34	33.42	0.48	1.0e-08
Dlgap3	63.63	46.21	0.48	8.8e-13
A430027H14Rik	8.75	6.6	0.48	3.0e-05
Cacna2d3	504.62	362.99	0.48	1.8e-24
Atp2b3	103.52	75.43	0.48	4.3e-13
Begain	59.7	42.79	0.48	4.7e-17
Cntln	124.18	89.13	0.48	5.8e-11
Gabrd	3.02	2.27	0.48	3.4e-02
Epb41l4b	145.87	105.84	0.48	9.3e-11
Pdzd2	90.9	65.47	0.48	3.6e-15
1110015O18Rik	5.1	4	0.48	8.9e-03
Brinp1	374.18	271.21	0.48	8.8e-13
Ltbp4	49.37	35.61	0.48	2.0e-17
Bbs9	200.14	142.98	0.48	4.0e-23
Bean1	39.09	28.87	0.48	2.9e-07
Ovgp1	9.85	7.01	0.48	2.3e-04
Ccdc112	57.47	41.5	0.48	3.5e-16
Uhrf1bp1l	107.68	77.28	0.48	2.1e-39
Tnik	710.65	517.3	0.48	4.8e-17
Csrnp2	17.6	12.82	0.48	1.9e-08
P2ry14	280.18	202.3	0.48	4.1e-28
Palm	115.84	82.32	0.48	3.3e-18
Zfp692	148.57	105.24	0.48	4.0e-14
Kcnma1	708.84	514.3	0.48	2.8e-19
Rab11fip4os1	12.46	9.37	0.48	3.4e-06
Mpzl3	6.47	4.72	0.48	2.5e-03
Utp20	39.21	27.83	0.48	1.2e-16
Ankrd13d	59.38	42.79	0.48	7.9e-17
Pcsk6	23.62	16.82	0.48	4.3e-05
Skap1	37.74	26.76	0.48	2.1e-04
Abcc1	48.22	35.16	0.48	6.5e-11
Tomm20l	18.77	13.65	0.48	1.1e-07
Vac14	30.37	21.83	0.48	4.2e-11
Ankrd13a	80.19	57.3	0.48	2.6e-13
Zwilch	11.52	8.2	0.48	1.3e-04
Cyb5r2	2.74	1.99	0.48	2.7e-02
Adgra1	102.4	74.4	0.47	1.1e-13
Srsf9	40.5	29.12	0.47	4.1e-16
Serpinb3b	5.37	3.95	0.47	2.4e-03
Med12l	248.78	180.25	0.47	1.6e-17
C030047K22Rik	15.15	11.27	0.47	8.1e-06
A230057D06Rik	673.12	480	0.47	6.6e-19
A930007I19Rik	27.35	19.65	0.47	3.4e-08
4930570G19Rik	38.75	27.87	0.47	6.2e-11
Spata48	6.18	4.56	0.47	1.3e-03
Lpar2	3.03	2.23	0.47	3.8e-02
Ube2ql1	25.93	18.54	0.47	2.3e-04
Hsf5	12.91	9.02	0.47	9.6e-06
Got1l1	3.14	2.44	0.47	2.3e-02
Rfesd	32.73	24	0.47	1.3e-16
Ankrd50	24.75	17.57	0.47	2.3e-05
4930527B05Rik	24	17.66	0.47	3.6e-07
Nvl	155	112.49	0.47	7.8e-19
Slc37a1	28.55	20.8	0.47	1.5e-10
Rtl1	55.13	40.21	0.47	3.5e-08
Ube2cbp	18.1	13.32	0.47	6.2e-07
Cabin1	152.82	110.66	0.47	3.8e-38
Anks1b	1322.39	966.87	0.47	1.4e-15
Fut8	236.17	171.17	0.47	1.7e-32
Kcnk13	50.73	37.47	0.47	1.0e-03
Mpped1	21.82	16.03	0.47	1.1e-06
Klhl29	312.18	230.18	0.47	4.8e-13
Kif17	53.81	39.1	0.47	6.5e-09
Zdhhc24	23.35	16.92	0.47	1.7e-10
Dennd3	30.71	22.63	0.47	2.0e-10
Gtpbp3	29.37	21.22	0.47	8.5e-12
Tnfaip8l1	2.93	2.16	0.47	2.0e-02
Crip3	3.08	2.33	0.47	1.3e-02
Flt3	34.4	26.84	0.47	3.6e-04
Cys1	29.47	21.17	0.47	1.3e-08
Gpr87	6.94	5.07	0.47	4.9e-03
Nmnat2	261.58	190.69	0.47	1.8e-13
Tonsl	7.28	5.06	0.47	3.7e-04
Prepl	113.52	81.52	0.47	3.2e-13
Gabra3	139.52	101.47	0.47	6.0e-23
Serpini1	111.35	83.07	0.47	1.0e-11
Hes6	22.77	17.14	0.47	1.4e-06
Kcnb1	95.93	69.47	0.47	3.7e-21
Kremen2	4.39	3.28	0.47	7.7e-03
Prkcb	365.6	259.77	0.47	2.2e-07
Adamts3	29.22	21.2	0.47	6.8e-08
Nebl	609.57	445	0.47	1.0e-18
Mboat2	143.28	102.71	0.47	4.5e-14
Gpr173	23.66	17.1	0.47	3.3e-11
Adra1b	18.08	13.05	0.47	1.4e-03
Dgkh	151.61	109.42	0.47	1.8e-14
A230050P20Rik	127.98	92.35	0.47	2.2e-12
Il17b	4.34	3.04	0.46	5.0e-03
Cx3cl1	87.15	63.29	0.46	5.6e-11
Wdr31	25.48	18.83	0.46	1.5e-07
Rgs7bp	141.98	103.51	0.46	2.0e-10
Platr2	5.03	3.62	0.46	5.8e-03
Pla2g6	35.78	24.95	0.46	2.1e-04
4931423N10Rik	6.75	4.99	0.46	6.2e-04
Taf1b	116.36	85.11	0.46	2.1e-22
Bend6	203.08	150.31	0.46	7.0e-12
Fgf14	2853.14	2097.43	0.46	1.9e-12
4930554H23Rik	2.89	2.06	0.46	3.4e-02
Kifc1	13.17	9.43	0.46	5.2e-05
Tsks	2.52	1.85	0.46	3.6e-02
Jam3	151.63	109.8	0.46	9.1e-13
Mettl4	16.06	11.67	0.46	6.2e-06
Fam98a	59.39	43.14	0.46	1.1e-14
Syn1	211.01	154.42	0.46	8.1e-21
Stk40	44.29	32.12	0.46	4.8e-09
Slc23a4	2.65	1.96	0.46	2.7e-02
Fam189b	57.46	42	0.46	4.7e-19
Ylpm1	192.13	140.47	0.46	4.1e-18
Dscam	920.21	683.75	0.46	9.1e-14
Fam57b	71.45	50.81	0.46	3.1e-11
Spock3	564.21	410.92	0.46	3.2e-11
N4bp2	84.08	61.25	0.46	2.0e-08
Acnat1	3.34	2.45	0.46	3.2e-02
Itgbl1	40.74	30.85	0.46	9.9e-05
Rrp15	26.02	19.19	0.46	5.9e-11
Sntb2	72.53	53.2	0.46	1.9e-13
1700084C06Rik	90.45	65.76	0.46	1.5e-17
Tenm3	568.44	417.69	0.46	1.3e-07
Dsg3	4.29	3.24	0.46	1.6e-02
Patj	80.15	59.48	0.46	7.8e-10
Tmem181a	216.25	157.05	0.46	7.6e-24
1700109K24Rik	28.15	20.81	0.46	1.2e-07
Pnpla3	22.92	17.48	0.46	3.2e-04
Zcchc18	533.38	395.49	0.46	2.2e-12
Plppr4	122.64	89.12	0.46	4.6e-11
Bzw2	79.95	58.77	0.46	7.1e-11
Slf2	162.19	118.19	0.46	3.2e-13
Tcte2	132.87	99.64	0.46	4.9e-08
Clstn2	317.73	230.28	0.46	5.8e-09
Ank2	1840.48	1354.16	0.46	2.2e-27
Lrrc40	46.51	34.19	0.46	3.7e-16
Ccdc7b	19.72	14.41	0.46	3.7e-06
Klhl33	34.64	25.68	0.45	1.5e-06
Trim66	21.04	15.41	0.45	1.1e-06
Ccdc57	103.79	75.75	0.45	4.9e-22
Mterf1b	8.57	6.18	0.45	1.5e-04
Dlgap1	1306.01	956.61	0.45	7.5e-31
Smarcd3	87.58	65.25	0.45	2.4e-16
Nob1	79.85	59.01	0.45	2.9e-25
Ogfod1	95.96	69.7	0.45	2.4e-14
Mindy4b-ps	4.58	3.4	0.45	1.9e-02
Sec61a2	194.49	142.43	0.45	1.2e-25
Popdc3	3.8	2.94	0.45	4.3e-02
Spata7	180.49	131.5	0.45	6.8e-11
Rims2	768.86	562.5	0.45	8.0e-17
9630028H03Rik	83.75	64.81	0.45	4.7e-04
Slc2a3	108.53	79.82	0.45	2.1e-20
D5Ertd615e	9.96	7.48	0.45	3.2e-03
Lncbate1	25.6	18.11	0.45	4.7e-03
Arrdc1	39.43	28.96	0.45	3.5e-08
Tfap2d	9.77	7.78	0.45	3.1e-03
Rcan3	66.83	49.09	0.45	1.2e-15
Fxyd7	54.91	43.67	0.45	1.6e-04
Pitpnm1	73.33	53.88	0.45	2.1e-14
Srgap3	407.71	300.51	0.45	4.4e-19
2900092C05Rik	6.25	4.56	0.45	2.0e-03
Pacsin1	336.79	249.66	0.45	1.1e-28
Dmd	1170.27	858.89	0.45	2.6e-16
Olfr643	8.79	6.35	0.45	1.1e-03
Magel2	46.58	34.28	0.45	3.3e-08
Hexdc	54.92	40.17	0.45	6.1e-12
AI854703	7.77	5.8	0.45	6.6e-04
Map3k21	3.03	2.18	0.45	3.8e-02
Plppr1	152	110.82	0.45	3.0e-13
Fndc3a	257.08	189.63	0.45	3.8e-21
5033417F24Rik	5.95	4.27	0.45	5.3e-03
Pus7	74.94	55.22	0.45	3.2e-16
Dagla	54.97	40.78	0.45	4.5e-13
A930015D03Rik	174.2	126.82	0.45	2.2e-12
Sept5	4.58	3.54	0.45	6.3e-03
4930533K18Rik	5.11	3.59	0.45	1.5e-02
Dhx32	80.03	59.27	0.45	5.1e-13
Hcn4	7.92	5.57	0.45	5.9e-03
Tfpi	7.55	5.36	0.44	1.7e-02
Zfp941	61.15	45.2	0.44	3.0e-12
4632404H12Rik	8.63	6.44	0.44	1.9e-04
Ttc39a	29.99	22.39	0.44	3.0e-13
Slc29a4	13.84	10.06	0.44	1.2e-04
Dbn1	148.53	109.92	0.44	3.1e-16
2310002D06Rik	4.28	3.26	0.44	1.7e-02
Rap1gds1	176.61	131.64	0.44	2.2e-10
Mri1	51.62	38.02	0.44	4.8e-08
Fxyd4	45.1	33.95	0.44	3.0e-06
Ppip5k1	108.55	80.42	0.44	1.8e-15
Tm6sf2	2.49	1.86	0.44	4.0e-02
Slc6a6	167.65	123.98	0.44	1.3e-11
Ociad2	53.1	40.33	0.44	1.9e-07
Tmem8	10.58	7.66	0.44	4.6e-05
Dtnb	305.14	228.79	0.44	1.6e-15
Snhg11	10780.33	8020.86	0.44	1.3e-10
Gprin1	12.22	8.73	0.44	4.5e-05
Sbf2	318.38	237.59	0.44	5.0e-17
Igfbp3	7.93	5.9	0.44	5.3e-03
Tmed8	44.07	32.02	0.44	5.6e-10
Rims1	844.65	632.14	0.44	2.0e-10
Dis3l	32.91	24.53	0.44	1.3e-09
Nrep	19.01	13.93	0.44	3.9e-06
Actr1b	126.1	94.08	0.44	5.1e-14
Gnl3	92.22	68.27	0.44	2.2e-25
Hrk	16.53	12.33	0.44	3.3e-04
B3glct	42.8	31.66	0.44	2.4e-06
Rnf157	169.62	129.14	0.44	7.1e-11
Tcea2	43.21	32.25	0.44	8.9e-09
Lbhd2	18.34	15.75	0.44	1.7e-02
Stk35	18.08	13.13	0.44	4.3e-08
Ttc21b	62.91	46.85	0.44	3.1e-14
2700038G22Rik	13.12	9.64	0.44	9.7e-06
Mmp24	65.5	48.55	0.44	3.6e-09
Mark1	83.15	61.75	0.44	1.4e-11
Twf2	41.12	30	0.44	1.7e-05
4930415O20Rik	5.12	3.83	0.44	2.6e-02
Dtnbos	104.16	76.12	0.44	3.2e-11
Nt5c3b	38.75	28.81	0.44	2.5e-07
Ccdc148	159.03	118.08	0.44	5.2e-17
Hs3st1	24.91	18.79	0.44	3.0e-08
Slc16a7	71.57	53.98	0.43	9.2e-08
Dmxl2	153.94	114.44	0.43	3.1e-25
Slc24a2	404.28	311.8	0.43	2.6e-05
Stox1	32.37	24	0.43	4.7e-09
Ftx	297.35	223.07	0.43	1.5e-09
Ppef2	7.05	5.13	0.43	6.8e-03
Trpm2	33.86	25.15	0.43	6.2e-07
Rec8	10.54	7.71	0.43	7.3e-03
Polq	9.11	6.6	0.43	7.2e-04
Col16a1	31.76	23.68	0.43	1.9e-06
Samd10	25.26	19.03	0.43	2.0e-09
Oca2	5.68	4.3	0.43	6.0e-03
Gkap1	222.33	164.07	0.43	3.6e-21
Cdc42bpa	372.2	280.79	0.43	1.1e-09
Zbbx	28.93	21.34	0.43	3.1e-03
Acsl1	80.4	59.78	0.43	6.1e-14
Zbtb17	37.33	27.13	0.43	1.4e-08
Stx2	55.24	40.95	0.43	4.6e-19
Dtwd2	13.77	10.36	0.43	4.6e-07
Grik2	1391.29	1043.37	0.43	8.5e-17
Mlxip	70.78	52.78	0.43	1.9e-06
Mfsd4b1	5.86	4.38	0.43	7.8e-03
Mcm8	9.88	7.32	0.43	3.8e-05
Csnk1g1	213.75	159.41	0.43	2.9e-24
Kdm1b	12.91	9.51	0.43	3.2e-06
Camk1d	299.5	284.53	0.43	3.7e-02
Vps37d	58.96	43.44	0.43	2.1e-07
Ankrd35	17.68	13.24	0.43	1.3e-05
Hrh3	24.8	18.42	0.43	4.6e-05
Ppm1l	160.99	118.11	0.43	3.0e-10
Trio	292.52	219.64	0.43	7.6e-22
Wdr34	87.22	64.64	0.43	3.6e-17
Mcf2l	150.45	112.24	0.43	7.9e-18
4930539E08Rik	3.89	3.02	0.43	2.7e-02
Dync1i2	301.06	224.9	0.43	6.5e-15
Tro	203.26	150.22	0.43	1.5e-15
Camk2a	268.85	199.86	0.43	5.1e-23
Dmtn	129.73	97.5	0.43	7.7e-16
Rcc1l	30.31	22.54	0.43	2.5e-07
Celsr3	37.09	27.55	0.43	2.8e-08
Mageb18	9.85	7.44	0.43	2.4e-04
C1galt1	30.21	22.47	0.43	6.0e-12
L2hgdh	29.39	22.17	0.43	2.8e-09
Krt222	43.06	32.87	0.43	4.1e-07
4930554G24Rik	5.4	4.11	0.43	3.4e-03
C130026I21Rik	8.51	6.19	0.43	1.3e-03
Ppp1r13l	2.52	1.85	0.43	4.2e-02
9430015G10Rik	31.71	23.66	0.43	3.5e-10
Trub1	38.11	28.52	0.43	8.5e-12
Gdap1	88.53	65.8	0.43	2.8e-11
Bsn	116.6	87.37	0.43	7.8e-19
Ica1	204.13	152.68	0.43	2.3e-15
Inhba	12.53	9.19	0.43	1.5e-03
Kdm4d	16.76	12.77	0.43	1.3e-03
1810043G02Rik	42.54	31.54	0.43	2.6e-13
Klhl7	212.66	157.76	0.43	3.8e-25
Dync2h1	224.05	166.46	0.43	1.8e-12
BC039966	4.15	3.41	0.43	4.3e-02
Sarm1	32.64	24.62	0.43	1.5e-08
Fam160a2	56.43	42.25	0.43	7.3e-20
Grb14	55.56	42.8	0.43	5.0e-06
Ahctf1	81.68	60.68	0.43	5.1e-13
Ndufaf6	49.78	37.45	0.43	7.4e-12
Birc5	4.72	3.44	0.43	3.7e-02
Slc17a5	73.94	55.02	0.43	2.9e-13
Kdm7a	70.99	52.71	0.43	5.4e-12
Tecpr1	90.93	67.1	0.43	8.6e-18
Naaladl2	364.82	273.81	0.43	6.3e-12
5530401A14Rik	42.43	32.11	0.43	4.7e-06
Zfr2	94.17	71.29	0.43	8.6e-14
Kcnc3	63.36	47.42	0.43	1.0e-09
Pak6	56.01	41.7	0.43	9.5e-12
Tnpo3	137.21	102.57	0.43	2.0e-42
Slc8a1	548.4	414.26	0.42	5.2e-12
Atxn7l1os1	11.07	8.71	0.42	5.5e-04
Efcab5	14.62	11.09	0.42	7.0e-05
Jdp2	29.26	21.84	0.42	3.2e-07
Ntsr1	7.5	5.63	0.42	2.1e-03
Cpsf1	18.23	13.42	0.42	1.4e-06
Add3	136	101.96	0.42	2.0e-09
Cadps	713.84	542.4	0.42	2.2e-10
Adgra2	8.59	6.55	0.42	4.9e-04
Ttbk1	56.72	42.63	0.42	6.1e-16
Tnfrsf21	76.85	58.05	0.42	1.6e-16
Mest	69.65	51.74	0.42	5.5e-07
Trim46	110.38	82.65	0.42	3.1e-17
Pabpc4	115.87	85.53	0.42	2.9e-15
4930568G15Rik	4.2	3.36	0.42	1.8e-02
Nudcd1	52.44	39.33	0.42	1.8e-16
Pxylp1	29.11	21.85	0.42	1.6e-08
Adam22	329.91	247.22	0.42	2.9e-15
Lypd1	32.99	25.55	0.42	2.4e-03
Cacna1d	507.04	382.19	0.42	2.9e-24
Hpcal4	35.45	28.72	0.42	3.7e-03
Cep78	95.29	71.26	0.42	3.0e-16
Ptprn2	882.74	669.1	0.42	6.3e-11
Telo2	48.5	35.52	0.42	2.1e-09
Nup210	38.12	28.01	0.42	7.3e-05
Alas2	26.14	20.07	0.42	3.3e-06
Zc3h6	116.99	87.88	0.42	2.0e-22
C030034L19Rik	9.58	7.21	0.42	2.6e-04
Taf1a	42.75	31.95	0.42	3.0e-12
Kcnq1	263.9	199.62	0.42	5.8e-13
Noc2l	35.68	26.84	0.42	2.0e-14
Pak3	442.36	333.09	0.42	2.4e-14
Fbxw7	117.28	87.48	0.42	8.1e-23
Camsap3	19.72	14.59	0.42	5.2e-07
BC030343	5.18	3.78	0.42	9.5e-03
Tmem131l	61.24	46.04	0.42	7.7e-10
Entpd6	71.87	54.03	0.42	5.7e-11
Baiap3	373.91	282.2	0.42	1.2e-16
Doc2g	8.68	6.72	0.42	8.0e-03
Hsf4	19.4	15.2	0.42	4.3e-05
Rhpn1	7.22	5.61	0.42	3.0e-03
Slc45a4	32.17	24.07	0.42	1.0e-09
Tdrp	10.88	8.04	0.42	2.1e-04
Rfng	40.45	30.35	0.42	3.1e-13
Mecr	110.92	84.5	0.42	3.4e-15
Rrp1b	27.96	21.02	0.42	2.5e-09
Sv2b	51.67	39.06	0.42	1.0e-14
Npas4	6.62	4.92	0.42	3.9e-02
Htra2	51.56	39.52	0.42	5.8e-13
Tenm1	610.41	459.35	0.42	7.9e-10
Asic2	2108.94	1585.11	0.42	8.7e-13
Fam13c	96.82	73.26	0.42	1.1e-11
Hells	13.38	10.13	0.42	1.2e-05
Agap1	313.16	237.26	0.42	3.1e-18
Ppfia4	51.47	38.8	0.42	1.6e-09
Nr6a1	236.25	177.15	0.42	3.1e-22
Slc22a21	16.75	12.54	0.42	2.2e-05
Senp8	132.56	98	0.42	1.3e-12
Xpr1	255.36	191.98	0.42	1.9e-19
Tmem179	138.5	105.65	0.42	7.6e-10
Ankrd27	30.04	22.42	0.42	9.1e-11
Nptn	507.99	380.97	0.42	1.3e-08
Fam117a	14.2	10.5	0.42	5.7e-05
Kif2a	146.99	110.27	0.42	2.1e-30
Eipr1	67.4	50.61	0.42	2.1e-13
Rnf126	52.19	39.62	0.42	1.4e-13
Ccdc6	63.03	46.88	0.42	5.9e-17
Nhsl2	80.47	60.84	0.41	2.6e-11
Cdk17	118.9	88.79	0.41	2.2e-12
Serac1	37.39	28.38	0.41	1.4e-08
Vldlr	40.97	30.84	0.41	3.0e-06
Xkr4	884.44	673.77	0.41	1.3e-12
Ptger2	4.04	3.15	0.41	1.2e-02
Cnbd1	9.4	7.06	0.41	3.2e-03
Arhgap18	162.18	122.84	0.41	2.7e-11
Far1os	57.27	43.49	0.41	1.2e-12
Tln2	138.6	103.99	0.41	3.8e-07
Cdkl2	58	43.65	0.41	1.6e-09
Lcor	286.12	214.13	0.41	1.7e-29
Dok3	11.48	8.86	0.41	4.7e-02
Arrb2	49.19	35.45	0.41	8.6e-06
Dzank1	193.81	146.25	0.41	2.1e-12
Speg	51.5	39.41	0.41	7.7e-11
Lrrc1	52.44	39.74	0.41	2.3e-10
Smim17	5.43	4.15	0.41	5.0e-03
Cyld	177.03	133.32	0.41	1.2e-27
Slc25a37	10.98	8.25	0.41	5.2e-05
Suds3	79.22	59.65	0.41	2.5e-12
Wdr13	50.24	37.71	0.41	1.0e-15
Ccdc120	9.74	7.63	0.41	2.7e-03
4933406F09Rik	7.62	5.89	0.41	5.4e-03
Timm9	125.73	95.55	0.41	3.3e-15
Epb41l1	191.34	144.41	0.41	2.6e-16
Fank1	21.99	16.84	0.41	1.7e-03
Adam23	260.73	195	0.41	5.3e-10
Gpatch4	27.72	20.84	0.41	3.8e-08
Lin28b	129.09	98.82	0.41	7.6e-06
Xlr5a	10.65	7.98	0.41	4.8e-05
Syt3	27.57	21.24	0.41	1.1e-05
1700111N16Rik	10.88	8.22	0.41	3.1e-04
Pappa	12.91	9.64	0.41	5.5e-05
Nle1	29.62	22.75	0.41	1.8e-06
Frmd4a	1492.7	1137.58	0.41	1.4e-12
Zmym6	115.99	87.12	0.41	1.5e-09
4930452B06Rik	16.9	12.88	0.41	4.9e-03
Ercc8	25.02	19.32	0.41	1.7e-05
Tmem63b	121.28	91.27	0.41	3.7e-34
Cntnap1	51.96	38.76	0.41	4.1e-06
Alg13	35.46	27.08	0.41	1.2e-09
Tyk2	34.86	25.78	0.41	4.4e-07
Cpeb2	75.23	57.33	0.41	5.6e-11
Klhdc9	17.86	13.76	0.41	4.7e-05
Mapkbp1	81.71	62.45	0.41	6.7e-12
Aard	13.34	10.22	0.41	5.0e-05
Zmym3	57.09	42.92	0.41	6.7e-15
Il17d	14.6	11.01	0.41	3.3e-06
Fbxl19	46.11	34.26	0.41	2.8e-12
Pcdh8	27.18	20.48	0.41	1.6e-04
Pgm2l1	81.26	61.54	0.41	2.8e-08
Aacs	47.82	36.86	0.41	4.7e-11
Cadm3	117.48	89.16	0.41	3.5e-06
Gpc1	38.08	27.88	0.41	8.8e-05
Shc2	76.17	57.6	0.41	2.2e-13
Vps50	130.51	98.35	0.41	1.4e-23
Stx3	85.22	64.68	0.41	5.4e-09
Jazf1	232.36	176.04	0.41	3.2e-14
Lrrc45	85.89	65.53	0.41	1.0e-07
Lonrf3	19.34	15.1	0.41	5.0e-03
Dnajb5	15.87	11.95	0.41	9.1e-06
Zfat	51.57	39.11	0.41	2.5e-09
Myo16	94.31	72.24	0.41	4.6e-08
Prdm10	100.44	76.66	0.41	1.2e-13
Ptbp2	192.51	144.14	0.41	4.0e-20
Zfp599	4.48	3.24	0.4	2.0e-02
AI467606	9.31	7.15	0.4	3.0e-03
Grm4	14.44	11.04	0.4	5.2e-05
Arl13a	5.65	4.33	0.4	6.4e-03
Clcn2	31.2	23.2	0.4	8.4e-08
Kif21a	429.42	325.05	0.4	9.1e-27
Dlc1	177.65	135.97	0.4	3.5e-08
Socs5	44.98	33.63	0.4	1.2e-10
Vstm5	40.14	30.67	0.4	1.6e-05
Rnf169	154.99	119.98	0.4	2.3e-09
Ercc6	32.31	24.66	0.4	2.0e-10
Rab15	41.95	31.57	0.4	6.3e-08
Mdn1	126.95	96.33	0.4	1.0e-13
Ints10	71.83	54.45	0.4	1.3e-10
Snap91	240.38	184.11	0.4	7.6e-11
Tnxb	11.16	8.52	0.4	3.8e-03
Foxk1	48.98	36.86	0.4	1.6e-08
Stxbp1	239.51	181.93	0.4	1.1e-21
Slc4a7	76.6	58.89	0.4	1.1e-09
Uggt2	124.39	95.1	0.4	9.2e-12
Tmem231	23.64	18.17	0.4	1.4e-08
Phlpp2	127.61	96.72	0.4	1.5e-10
Gramd2	12.62	9.9	0.4	2.1e-03
Hivep2	374.51	287.07	0.4	1.8e-10
Kcnab2	29.04	22.25	0.4	6.3e-07
9530036O11Rik	51.59	38.87	0.4	7.2e-04
Dph1	15.23	11.39	0.4	1.3e-05
Hacd1	109.93	84.12	0.4	3.8e-09
Enkd1	14.07	10.68	0.4	1.7e-05
Elfn2	31.49	23.89	0.4	2.7e-10
Zfp940	21.71	16.36	0.4	4.1e-06
Inpp5k	48.97	37.12	0.4	7.0e-10
Zkscan16	117.02	90.9	0.4	2.6e-08
Sox12	11.84	9.02	0.4	1.5e-04
Fam131a	76.65	57.63	0.4	4.8e-11
Zfp618	91.25	70.15	0.4	8.4e-05
Rrp12	15.29	11.56	0.4	3.0e-05
Ddx51	9.78	7.31	0.4	6.7e-04
Tmem150cos	6.91	5.28	0.4	1.9e-02
Nup93	71.61	55.33	0.4	3.8e-10
Hgh1	10.07	7.24	0.4	2.9e-03
Pnkp	60.98	46.33	0.4	4.3e-16
Wipf3	43.81	33.52	0.4	6.3e-08
Drc1	73.64	56.31	0.4	9.7e-08
Oxr1	419.33	318.07	0.4	3.7e-11
Hook2	78.77	60.92	0.4	6.7e-08
Slitrk4	24.26	18.62	0.4	7.7e-06
Adam11	59.19	44.77	0.4	3.2e-04
Bcl7c	47.96	36.25	0.4	3.8e-14
Nol4	303.72	230.69	0.4	1.1e-09
Mrnip	39.83	30.84	0.4	2.9e-06
Nusap1	20.54	15.52	0.4	2.3e-06
Sel1l2	5.13	4.01	0.4	1.0e-02
1700112M02Rik	15.64	11.44	0.4	2.0e-03
Slc25a32	34.75	26.46	0.4	5.8e-08
Rundc3b	137.09	105.2	0.4	1.4e-09
Gucy1b1	70.3	53.76	0.4	3.3e-11
Ptp4a2	112.23	83.82	0.4	1.1e-05
Smug1	15.9	11.98	0.4	4.4e-05
Abcg1	59.75	45.94	0.4	5.1e-06
Cpt1c	111.51	85.05	0.39	1.5e-17
Bop1	33.92	25.59	0.39	2.8e-09
Hapln4	29.02	23.18	0.39	1.1e-04
Cobl	97.3	75.01	0.39	4.2e-06
Zgpat	44.93	34.5	0.39	1.7e-10
Cmc2	23.63	18.32	0.39	8.0e-06
Slc1a1	77.13	58.77	0.39	1.3e-13
Rap1gap2	131.92	100.96	0.39	8.1e-17
Senp5	160.16	121.54	0.39	7.5e-19
1700105P06Rik	5.14	4.01	0.39	2.7e-02
Arhgap33	42.34	32.37	0.39	1.5e-11
Smyd5	46.09	35.93	0.39	1.8e-12
Dctd	8.14	6.18	0.39	3.8e-04
Esr2	5.9	4.6	0.39	3.9e-02
Zbtb43	22.4	17.2	0.39	1.9e-08
Gpat3	16.03	12.08	0.39	1.3e-05
Rps2	12.2	9.16	0.39	1.6e-04
B230217O12Rik	28.64	21.96	0.39	3.1e-08
Cfap61	50.98	40.62	0.39	3.9e-02
Fubp1	252.09	193.17	0.39	2.8e-19
Hhipl1	20.69	15.99	0.39	4.6e-05
Meaf6	92.32	70.91	0.39	3.3e-16
Atp9a	247.62	187.56	0.39	9.4e-17
Aff2	177.26	136.46	0.39	7.6e-08
Pnma2	40.52	30.01	0.39	2.8e-05
Bicd1	382.69	296.19	0.39	2.9e-13
Colgalt1	62.22	46.61	0.39	6.5e-07
Prmt7	78.08	60.37	0.39	7.8e-11
Stxbp6	78.66	60.91	0.39	1.3e-03
Ydjc	37.87	29.03	0.39	4.5e-06
1700126G02Rik	39.02	30.02	0.39	1.5e-06
Sema3a	23.58	17.71	0.39	3.4e-03
Syt14	97.22	75.47	0.39	1.1e-09
Exoc6	50.48	38.53	0.39	1.5e-06
Zfp575	5.09	4.14	0.39	1.6e-02
Ints6	115.61	88.39	0.39	5.4e-19
Pcgf2	41.91	31.96	0.39	2.2e-11
Scrt2	3.58	2.79	0.39	2.4e-02
Cyp2c66	15.42	11.96	0.39	3.1e-05
Rps6kc1	69.91	53.52	0.39	2.7e-16
4430402I18Rik	118.08	86.67	0.39	7.6e-09
Gnpda1	23.89	18.13	0.39	2.5e-07
Alg6	44.16	34.07	0.39	4.2e-09
Amph	208.5	160.95	0.39	3.7e-11
Pex26	13.83	10.55	0.39	7.5e-04
Slc12a9	44.1	33.88	0.39	9.0e-05
Smc2	23.46	17.79	0.39	2.0e-04
Pnpt1	93.03	71.53	0.39	6.9e-09
Plcl2	128.33	99.64	0.39	3.9e-09
Mok	93.42	70.92	0.39	3.0e-08
Nsf	377.17	290.06	0.39	1.6e-33
Cers1	25.25	19.61	0.39	4.2e-06
Mrgbp	35.2	27.38	0.39	8.0e-08
Tomm40l	16.14	12.53	0.39	3.8e-05
Mettl2	59.67	45.73	0.39	5.1e-15
Iffo2	14.86	11.39	0.39	2.2e-05
Prkg2	19.03	15.02	0.39	2.8e-03
[truncated: 17,480 more rows]
