# Supplementary material for: Cross-species analysis defines the conservation of anatomically segregated VMH neuron populations
Source: eLife journal article supplement (doi:10.7554/elife.69065), 2021-05-21
Supplement: supp [file elife-69065-supp-v1.zip › elife_poa_e69065_Supplementary_file_3.csv]

Gene	Dlk1_1	Dlk1_2	Esr1_1	Esr1_2	Esr1_3	Esr1_4	Nfib_1	Nfib_2	Nfib_3	Foxp2_1	Foxp2_2	Foxp2_3	Fezf1_1	Fezf1_2	Fezf1_3	Lepr_1	Lepr_2	Lepr_3	Lepr_4	Lepr_5	Lepr_6	Lepr_7	Lepr_8	Lepr_9
Syngr3	0	0	0	0	0	0	0	0.15	0.06	0	0	0	0.01	0	0	0	0.16	0	0	0	0	0	0	0
Phka2	0	0	0	0.28	0	0	0	0	0	0.08	0	0.13	0	0	0	0	0.26	0	0	0	0	0	0	0
Kif13a	0	0	0	0	0	0	0	0	0	0	0	0	0	0	0	0	0	0	0.36	0.07	0	0.12	0.08	0
Herc2	0.04	0.06	0	0.08	0.07	0.12	0	0	0	0	0.02	0	0	0	0	0	0	0.1	0	0	0	0	0	0
Plxna2	0	0	0	0	0	0	0	0	0	0	0	0.29	0.24	0.14	0.63	0.06	0	0.05	0.12	0	0.04	0.06	0	0.1
Usp13	0	0	0	0.1	0	0	0	0	0	0	0	0	0	0	0	0	0.18	0.2	0	0	0	0	0	0
Jakmip2	0.13	0	0.14	0	0.08	0.11	0	0	0	0	0	0	0	0	0.08	0	0	0	0	0	0.07	0	0	0
Xpr1	0.13	0	0	0	0	0	0	0	0	0	0	0	0.18	0	0.11	0	0	0.16	0.04	0	0.04	0	0.01	0.03
Adcy1	0	0.12	0.05	0	0	0	0.4	0	0.03	0.25	0	0	0	0	0	0	0.19	0	0	0	0	0	0	0
Rreb1	0	0	0	0	0.42	0	0	0	0	0	0	0.5	0	0.26	0.11	0	0	0	0.66	0.46	0.26	0.36	0	0.21
Vgll3	0	0.77	0	0	0.25	0	0	0	0	0	0	0	0	0	0	0.04	0.73	0	0	0.94	0	0	0	0.2
Relt	0	0	0	0	0	0	0.03	0.11	0	0	0	0	0	0	0	0	0.16	0	0.16	0.55	0	0	0	0
Sh3bp2	0	0.23	0	0	0.47	0	0	0.16	0.09	0.23	0.48	0	0.13	0	0	0	0.74	0	0	0	0	0.13	0	0
B230209E15Rik	0.16	0.07	0.07	0	0	0	0	0	0	0	0	0	0	0	0	0	0	0	0	0.04	0	0	0	0
Klf3	0	0	0	0	0	0	0.88	0.07	0	0	0	0.06	0	0	0	0	0	0	0	0.52	0	0	0	0.26
Phkg1	0	0	0	0.31	0	0	0	0	0	0.04	0	0	0	0	0	0	0.84	0	0	0	0	0	0	0
Lrrc8b	0	0	0	0	0.16	0	0	0	0	0.02	0.02	0	0	0	0	0	0	0	0	0	0	0	0	0
Klf4	0	0.65	0.02	0	0.97	0	0.03	0	0	0	0	0	0	0	0	0	0.76	0	0	0	0	0	0	0
Mro	0	0	0.8	0	0.17	0.32	0	0	0	0	0	0	0	0	0	0	0	0	0	0	0.29	0	0	0
Masp1	0	0.92	0.87	0.4	0	0	0.68	0	0	0	0	0	0	0	0	0	0.47	0	0	0.21	0	0	0	0
Pdzrn4	0.21	0.01	0.43	0.29	0.68	0.27	0	0	0	0	0	0	0	0	0.49	0	0.18	0	0	0	0.34	0	0	0
Kcnc4	0	0	0	0	0	0	0	0.13	0	0	0	0.46	0	0	0	0	0.06	0.28	0	0	0.18	0	0.16	0
Sez6l	0	0.08	0.05	0	0.07	0	0	0	0	0.16	0	0.04	0.08	0	0.13	0	0	0	0	0	0.2	0.14	0	0
Radil	0	0.08	0	0	0	0	0	0	0	0	0	0	0	0	0	0	0	0	0	0	0	0	0	0.19
Stt3b	0	0	0	0	0	0	0.04	0	0	0	0	0	0	0	0	0	0	0	0	0.18	0	0	0	0
Tdrd3	0	0	0	0	0	0	0	0	0	0	0	0	0	0	0	0	0	0	0.65	0	0	0	0	0
Hmcn2	0	0	0	0	0	0	0	0	0	0	0	0	0	0	0	0	0	0.38	0.85	0.2	0.07	0.63	0.94	0.86
Fads1	0	0	0	0	0	0	0.22	0	0	0	0	0	0	0	0	0	0.12	0	0	0	0	0	0.11	0
A730046J19Rik	0	0	0	0	0	0	0	0	0	0	0	0.82	0	0	0	0.97	0.19	0	0	0	0	0	0	0
Rpl41	0	0	0	0	0	0	0.03	0	0.02	0	0	0	0	0.17	0	0.01	0	0	0	0	0	0	0	0.08
Mbip	0.06	0	0	0	0.38	0	0	0	0	0	0	0	0	0	0	0	0	0	0	0	0	0	0	0
Cntnap5a	0.35	0.28	0.28	0.23	0.19	0.18	0	0	0.21	0.06	0	0	0.08	0	0.23	0	0.02	0	0	0	0	0.04	0	0
Asap1	0	0.08	0	0	0	0	0.12	0	0	0	0.01	0	0	0.14	0	0	0.23	0.16	0	0	0	0	0	0
Msln	0.17	0	0.68	0.37	0.56	0.04	0	0	0	0	0	0	0	0	0.02	0	0.31	0	0.09	0.44	0.3	0	0.03	0
Mgat5	0	0	0	0	0	0	0	0.05	0	0.01	0	0	0	0.16	0.09	0	0.02	0.11	0	0	0.17	0.03	0	0
Son	0	0	0	0	0.04	0	0	0	0	0	0	0.08	0	0.13	0.1	0	0.2	0	0.15	0.13	0	0.11	0	0
Ngef	0	0.02	0	0	0	0	0	0	0	0	0	0	0	0	0	0	0.08	0	0.17	0	0.17	0	0	0
Acadsb	0.13	0.16	0	0	0	0	0	0	0.13	0	0	0	0	0	0	0	0.2	0	0	0	0	0	0	0
Fbn1	0	0	0	0	0	0	0.18	0.7	0	0.35	0.62	0	0	0	0	0	0.1	0	0	0	0	0	0	0
Elavl4	0.15	0.13	0	0	0	0.14	0.03	0	0	0	0	0	0.06	0.21	0	0	0.13	0	0	0	0	0	0	0
Wwc1	0	0	0.28	0	0.44	0	0	0	0	0.03	0.07	0	0	0	0	0	0.03	0	0	0	0	0	0	0
Adcyap1	0	0	0.17	0.14	0	0.09	0	0	0	0.16	0	0	0	0	0	0.44	0	0	0	0	0	0	0.13	0
Pkn3	0	0	0	0	0	0	0	0	0	0	0	0	0	0	0	0.97	0	0	0	0	0.49	0	0.47	0
Htr4	0.67	0.29	0.28	0.43	0.27	0.25	0	0	0	0	0	0	0	0	0	0	0	0	0	0	0.27	0	0	0
Bmp4	0	0	0	1	0.36	0	0	0	0	0.05	0	0	0	0	0	0	0.09	0	0	0	0	0	0	0.12
Macrod1	0	0	0	0	0	0.02	0.23	0	0	0	0	0	0	0	0	0	0.33	0.21	0	0	0	0	0	0
1700111E14Rik	0.1	0.18	0	0	0	0	0	0	0	0	0	0	0	0	0	0	0.16	0	0	0	0.02	0.08	0	0
Grin2a	0	0	0	0.18	0	0.19	0.14	0	0	0	0.08	0	0	0.2	0	0.07	0	0.23	0.02	0.17	0.06	0.03	0.14	0
Junb	0	0	0	0	0	0	0	0	0	0	0	0	0	0.74	0.03	0.85	0.34	0	0	0	0	0	0	0
Prkcb	0.16	0	0.13	0	0	0	0	0	0	0	0.08	0.13	0.13	0	0	0.06	0	0	0	0	0.03	0.1	0.12	0.12
Arhgef12	0.13	0.18	0	0	0	0.02	0.11	0	0	0	0.13	0	0	0	0	0	0.2	0	0	0	0	0	0	0
Itm2b	0	0	0	0	0	0	0.2	0.14	0.2	0	0	0	0	0.1	0	0	0.16	0	0	0	0	0	0	0.13
Pld2	0	0	0.38	0.52	0	0.2	0	0	0	0	0	0	0	0.29	0.7	0	0	0	0	0	0.04	0	0.07	0
Ccdc187	0	0	0	0	0	0	0	0	0	0.83	0.68	0.58	0	0	0	0	0	0	0.2	0	0	0.02	0.65	0.6
Cpeb2	0	0	0	0	0	0	0	0	0.2	0	0	0.01	0	0	0.11	0	0	0	0	0	0.24	0	0	0
Nfia	0	0	0	0	0	0	0.99	0	0.04	0	0	0	0	0	0	0	0.5	0	0	0.04	0	0	0	0
9530026P05Rik	0	0	0.52	0	0	0	0	0	0	0	0	0	0	0.29	0.23	0	0	0	0.23	0.19	0.81	0.72	0.89	0.29
Gprc5b	0	0	0	0	0	0	0	0	0	0	0	0	0.24	0	0.51	0	0.45	0	0	0.08	0	0.09	0	0
1700012B09Rik	0.69	0.31	0	0	0	0	0.45	0	0	0	0	0	0	0	0	0	0.52	0	0.1	0.67	0	0	0	0
E130102H24Rik	0	0	0	0	0	0	0.29	0	0.11	0	0	0	0.06	0	0	0	0.03	0	0	0	0	0	0	0
Olfr920	0.33	0	0	0	0	0	0	0	0.47	0.98	0	0	0	0	0	0	0.62	0.25	0	0	0	0	0	0
Srpk2	0	0	0	0	0	0	0.01	0	0	0	0	0	0	0	0	0	0.2	0	0.07	0.07	0	0	0.12	0.16
Il34	0	0	0	0	0	0	0	0	0	0	0	0.19	0	0	0	0	0.07	0.29	0	0	0	0	0	0.21
Npas1	0	0	0	0	0	0	0	0	0	0	0	0	0	0	0	0	0	0.04	0	0	0.87	0	0	0.05
Hk2	0	0.05	0	0	0	0	0	0	0	0	0	0	0.17	0	0	0	0.56	0	0.84	0.67	0	0.33	0	0.01
Il5ra	0	0	0	0	0	0	0	0	0	0	0	0.01	0	0.35	0.02	0.7	0.07	0.22	0.34	0	0.49	0.91	0.26	0
Sema3f	0.84	0.61	0.24	0	0.67	0.39	0	0	0	0	0	0	0	0	0.28	0	0.21	0	0	0	0	0	0	0
Iigp1	0.01	0	0	0	0.99	0	0.01	0	0	0	0	0	0	0.26	0	0.25	0	0	0	0	0	0	0.03	0
4930549C15Rik	0	0	0	0	0	0	0	0.62	0.71	0	0	0	0	0	0	0	0.19	0	0	0	0	0	0	0
Mpzl1	0	0.27	0	0	0	0	0.03	0	0	0	0	0.1	0	0	0	0	0	0	0	0	0	0	0	0
Kcna1	0	0	0	0	0	0	0	0	0	0	0	0.58	0	0	0	0	0	0	0.05	0	0.79	0.11	0	0
Cacna1h	0	0	0	0	0	0	0	0	0	0	0	0.65	0	0	0.18	0	0	0	0	0.16	0.3	0.04	0	0
Sgip1	0	0	0	0	0	0	0	0	0	0	0.07	0.12	0	0	0	0	0	0	0.21	0.18	0.02	0.09	0.18	0.14
Prkch	0	0	0.05	0	0	0.16	0	0	0	0.81	0	0.39	0	0	0.12	0	0.5	0	0	0	0.23	0	0	0
Adra2a	0	0	0	0	0	0.46	0	0.34	0	0.7	0.84	0	0	0	0	0	0	0	0	0	0	0	0	0
Bcan	0	0	0	0.12	0	0	0.12	0	0.48	0	0	0	0	0	0	0	0.63	0	0	0	0	0	0	0
Twist2	0	0	0	0.64	0.79	0.27	0	0	0	0	0	0	0	0	0	0.25	0.18	0.22	0	0	0	0	0.57	0.1
Mical2	0.37	0	0.38	0.34	0.5	0.05	0	0	0	0	0	0	0.15	0	0.21	0	0.17	0	0	0	0	0	0	0
Sorcs1	0	0	0.38	0.12	0.18	0.19	0	0.32	0.35	0	0	0.44	0	0	0	0	0.18	0.23	0	0	0.34	0.18	0	0
Ptprn	0.13	0.02	0	0	0.05	0	0	0	0	0	0	0	0.05	0	0	0.11	0.19	0	0.05	0	0	0	0	0
Rxfp3	0.26	0	0	0	0.8	0	0	0	0	0	0	0.38	0	0.17	0.58	0	0.11	0	0	0	0.75	0	0	0.08
Mbd4	0	0	0	0.15	0.05	0	0	0	0	0.49	0	0.29	0	0	0	0	0.1	0	0	0	0	0	0	0
Gabrb1	0.17	0.18	0	0	0	0	0	0	0	0	0.12	0	0	0	0	0	0.02	0.2	0.25	0.24	0.16	0.24	0.21	0.23
Carmil1	0	0	0	0	0	0	0.2	0	0	0.08	0	0.02	0	0	0	0	0.13	0	0	0	0	0	0	0
Neto1	0	0	0	0	0	0.07	0	0.21	0.11	0.83	0.16	0.13	0	0	0	0.16	0	0	0	0	0.2	0	0	0
Upp2	0	0	0	0	0	0	0	0.1	0.07	0.19	0.12	0.1	0	0	0	0	0	0.14	0	0	0	0	0.07	0
Sybu	0.21	0.19	0	0	0.07	0.05	0	0	0	0	0	0	0	0	0.12	0.09	0.15	0.08	0	0.02	0	0.13	0	0.09
Ephx1	0.37	0.1	0.27	0.52	0.85	0	0	0	0	0	0	0	0	0	0	0	0	0	0	0	0.29	0	0	0.01
Tpbg	0	0	0.12	0	0	0	0	0	0.01	0	0	0.51	0.43	0.86	0.02	0	0.2	0	0	0.41	0	0.61	0	0.09
Oxtr	0	0.03	0.47	0.75	0.79	0.71	0	0	0	0	0	0	0.23	0	0.01	0	0.16	0	0	0	0.62	0	0	0
B3gnt2	0	0	0	0	0	0.11	0	0	0	0	0.05	0.28	0	0	0	0	0	0.64	0.23	0	0	0.25	0.36	0.42
Mdh1	0	0	0	0	0	0	0.1	0	0	0	0	0	0.02	0.08	0	0.09	0.08	0	0	0	0	0	0	0.12
Irak2	0.1	0.43	0	0	0	0	0	0	0	0	0	0	0.22	0	0.05	0	0.34	0	0.23	0.63	0	0.01	0	0
Ypel2	0.11	0.11	0	0	0	0	0	0	0	0	0	0	0	0.15	0.25	0	0.02	0	0	0	0.16	0	0	0
Hgf	0	0	0	0	0	0	0	0	0	0	0.11	0	0	1	0	0.46	0	0.3	0	0	0	0	0	0.1
Rgs14	0	0	0	0	0	0	0	0	0	0.54	0	0.07	0	0	0	0	0	0	0	0.4	0.26	0	0.2	0
Lhfp	0	0	0	0	0	0	0	0	0	0.89	0	0	0.7	0.76	0.62	0	0.05	0	0	0	0	0.02	0	0
Galnt12	0	0	0	0	0	0	0	0	0	0.52	0.27	0	0	0	0	0	0.02	0.55	0.24	0.29	0	0	0	0
1700080N15Rik	0	0	0	0	0	0	0	0.14	0	0	0	0	0	0	0	0	0.43	0.14	0	0	0	0	0	0
Rmdn2	0	0	0	0	0	0	0	0	0	0	0	0	0	0	0	0	0.12	0	0	0.72	0.03	0	0	0.18
Cep135	0	0	0	0.01	0	0	0	0	0	0.32	0.04	0.1	0	0	0	0	0	0	0	0	0	0	0	0
Pfkfb4	0	0	0.08	0	0.06	0	0	0	0	0	0	0	0	0	0	0	0	0	0	0	0	0	0.13	0
Dock5	0	0	0	0	0	0	0	0.03	0.09	0	0	0	0	0.96	0.56	0	0.42	0	0.1	0	0.44	0	0	0
Atp8a2	0	0	0	0	0	0	0	0	0	0	0	0	0	0	0.2	0	0	0.17	0.14	0.09	0.19	0.06	0.19	0
G930045G22Rik	0	0	0	0	0	0	0	0	0	0	0	0	0	0	0.46	0.65	0.01	0	0	0	0.95	0.75	0	0.62
Lin7a	0.15	0.28	0.14	0	0	0.2	0	0	0	0.34	0	0	0	0	0	0	0.31	0	0	0	0.54	0	0	0
Rbm26	0	0	0	0	0	0	0	0	0	0	0.03	0.17	0	0	0	0	0.18	0	0.07	0	0	0	0	0
Dgkk	0.83	0.46	0	0.33	0.93	0	0	0	0	0	0	0	0	0	0	0	0.77	0.44	0	0	0	0	0	0
Arsb	0	0	0	0	0	0	0	0.23	0	0.15	0.17	0	0	0	0	0	0	0	0	0	0	0	0	0
Dock10	0	0	0	0	0.41	0	0	0	0	0.59	0	0.31	0	0.13	0	0	0	0	0.28	0.12	0.12	0.16	0	0
Galnt18	0	0	0.03	0	0	0	0	0	0	0	0	0	0	0.29	0.28	0	0	0	0.18	0.12	0.32	0.17	0.34	0.01
Pim2	0	0	0	0	0	0	0	0	0	0	0	0	0	0	0	0	0.21	0	0	0	0	0	0	0.07
Myo5c	0	0	0.3	0.38	0.78	0	0	0	0	0	0	0	0	0	0	0	0	0	0.1	0.03	0.19	0	0	0
Aven	0	0	0	0	0	0	0	0	0	0.05	0.01	0	0	0	0	0.08	0	0.02	0.28	0.7	0	0	0	0
Tom1l1	0	0	0	0	0	0	0	0.14	0	0	0	0	0	0	0	0	0	0	0.02	0	0	0.22	0	0.14
Dync1i2	0	0	0	0	0	0	0	0	0	0.13	0	0.19	0	0	0	0	0	0	0.14	0	0	0	0	0
Klkb1	0.13	0.32	0	0.34	0	0	0	0	0	0	0	0.18	0	0	0.79	0.58	0.2	0	0	0	0.18	0.04	0	0
Lin28b	0	0.02	0	0.09	0.48	0.22	0	0	0	0	0	0	0	0	0	0	0	0	0	0	0	0	0	0
Abhd18	0.61	0.04	0	0	0.35	0	0	0	0	0.06	0.01	0.09	0	0	0.07	0	0	0	0	0	0	0	0	0
C130071C03Rik	0	0	0	0	0	0.15	0.54	0	0.15	0	0.22	0.09	0	0	0	0.15	0.09	0.19	0	0	0	0	0	0
Arap2	0.39	0.21	0	0.23	0.73	0	0	0	0	0	0	0	0	0	0.67	0	0.19	0	0	0	0.45	0	0	0
Tmem246	0	0.06	0	0	0	0	0	0	0.03	0	0	0	0	0	0	0	0.32	0	0	0	0	0	0	0
Col5a2	0	0	0	0	0.86	0	0	0	0	0	0.98	0	0	0.83	0	0	0.2	0	0	0	0	0	0	0
Vmn2r113	0	0	0	0	0.78	0.52	0	0	0	0	0.92	0	0	0	0	0	0	0	0	0	0	0.52	0.53	0
Rragd	0	0	0	0	0	0	0	0	0	0	0	0.12	0	0	0	0	0	0	0.23	0	0	0	0.1	0
Magt1	0.44	0	0	0.14	0	0	0	0	0	0	0	0	0	0	0	0	0.74	0	0	0	0	0	0	0
Asb2	0	0.34	0.49	0.48	0	0	0	0	0	0.94	0	0	0.21	0	0	0	0	0	0	0	0	0	0	0.14
Sccpdh	0	0.05	0	0	0.01	0.1	0.08	0	0.04	0	0	0	0	0	0	0	0.12	0	0	0	0	0	0	0
Sipa1l2	0	0	0	0	0	0	0	0	0	0	0	0	0.35	0	0.19	0	0.13	0.07	0	0	0.12	0.47	0	0
Elovl7	0	0	0	0	0	0	0	0	0	0	0.15	0.75	0	0	0	0	0.45	0	0	0.72	0	0	0	0
Chrm1	0	0	0.1	0	0	0	0	0.05	0.07	0.46	0.18	0.46	0	0.75	0	0	0	0	0	0	0	0	0.23	0
Pid1	0	0	0.01	0	0.17	0.35	0.11	0	0	0	0	0	0	0	0.41	0	0.05	0	0	0	0.66	0.21	0	0
Rffl	0	0	0	0	0	0	0	0	0	0	0	0	0	0	0	0	0.28	0	0	0	0	0	0	0.34
Tmprss4	0	0	0	0	0.32	0.47	0	0	0	0	0	0	0	0.24	0	0.82	0.14	0.85	0	0	0.45	0	0.59	0.11
Nedd4l	0	0	0.17	0.22	0.35	0.19	0	0	0	0	0.13	0	0	0	0.06	0	0.1	0	0	0	0	0	0.02	0
Tpo	0.55	0.27	0.07	0	0	0	0	0	0	0	0	0	0	0	0.43	0	0	0	0.16	0.32	0	0.36	0.13	0
Dlx5	0	0.06	0	0	0	0	0	0.07	0	0	0.83	0	0	0	0	0	0.98	0	0	0	0	0	0	0.55
Slc6a7	0.04	0.16	0.06	0	0.23	0.01	0	0	0	0	0.1	0	0	0	0	0	0.17	0.24	0	0	0	0	0	0
Agfg2	0	0	0	0	0	0	0	0	0	0.19	0	0.49	0	0	0	0	0	0	0	0.02	0	0	0	0
Ell2	0	0	0	0	0	0	0	0	0.9	0.28	0.33	0.02	0	0	0	0.5	0.18	0	0	0	0	0	0	0
Wdr78	0	0	0	0	0	0	0	0	0	0.06	0	0.08	0.16	0	0	0	0.02	0	0	0	0	0	0	0
Prkd2	0	0	0	0	0.02	0.09	0.25	0.13	0.66	0	0	0	0	0	0	0	0.19	0	0	0	0	0	0	0
Wdr95	0	0	0	0	0	0	0	0	0	0	0	0	0	0.29	0	0	0.33	0	0	0	0.22	0	0	0.13
Lrig1	0	0	0	0	0	0	0.37	0.63	0.62	0.03	0.35	0.47	0	0	0	0	0.24	0	0	0	0	0	0	0.03
Camk2a	0	0.03	0.14	0.18	0.2	0.1	0	0	0	0	0	0	0	0	0	0	0.11	0	0	0	0	0	0.01	0
Gramd1a	0.03	0	0	0	0	0	0	0	0	0	0	0.05	0	0	0	0.02	0.23	0	0	0	0	0	0	0
Ttc21b	0.22	0	0.02	0.05	0.3	0	0	0	0	0	0	0	0	0	0	0	0	0	0	0	0	0	0	0
Anks1b	0.21	0.07	0.19	0.19	0.23	0.21	0.2	0	0	0	0	0.16	0	0.2	0.18	0	0.14	0	0.21	0.17	0.18	0.17	0.14	0
Abracl	0	0	0.24	0	0.59	0.14	0	0	0	0.41	0	0.03	0	0	0	0	0.02	0	0	0	0.07	0	0	0
Pcyt2	0	0.17	0.02	0	0	0	0	0	0	0	0	0	0	0	0	0	0.18	0	0	0	0	0.12	0	0.17
Phf1	0.01	0	0	0.01	0	0	0	0	0.11	0	0	0	0	0	0	0	0.27	0	0	0	0	0	0	0.03
B3gnt5	0	0	0	0	0	0.87	0	0	0.92	0	0	0	0	0	0	0	0.48	0	0	0	0	0	0	0
C230014O12Rik	0	0.01	0	0	0	0	0.82	0.92	0.89	0	0.55	0	0	0	0	0.01	0.05	0	0	0	0	0	0	0
Adamts9	0	0	0.44	0	0	0	0	0	0	0	0	0	0	0	0	0	0.01	0	0.39	0.45	0.96	0.64	0.98	0.1
Map2k1	0	0	0	0	0	0	0	0	0	0	0	0.34	0	0.1	0	0	0.08	0	0.1	0	0	0.11	0	0.09
Tmem132e	0	0.07	0	0	0	0	0.24	0	0	0	0	0	0	0.02	0	0	0.05	0.3	0	0	0	0	0	0.12
Med12l	0	0	0	0	0	0	0	0	0	0	0	0.04	0	0	0	0	0	0.13	0.15	0	0.13	0	0	0.09
Sept10	0	0	0	0	0	0	0	0	0.03	0	0	0.39	0	0	0	0	0.35	0.13	0	0.05	0	0.17	0.29	0
Cmtm8	0.07	0	0	0	0.21	0	0	0	0	0	0	0	0	0.16	0	0	0.09	0	0.86	0.65	0	0	0	0.34
Kif6	0.59	0	0	0	0	0	0	0	0	0	0	0	0.79	0	0	0	0.11	0	0	0.14	0	0	0	0
Mtus2	0	0	0	0	0	0.06	0	0	0	0.02	0.13	0	0	0	0	0	0	0.22	0	0	0.1	0	0	0.15
Cdhr2	0.71	0.28	0	0	0	0	0	0	0	0	0	0	0.15	0	0	0	0.18	0	0.53	0.05	0	0	0.44	0
5330434G04Rik	0	0	0	0.01	0.09	0.03	0	0	0	0	0	0	0	0	0	0	0.12	0.16	0.09	0.19	0.15	0	0.18	0.14
Frmpd4	0	0	0.16	0.04	0	0	0	0	0	0.21	0	0.18	0	0	0	0.14	0.08	0.3	0.23	0.21	0.18	0	0	0.16
Efna5	0	0.23	0.46	0.13	0.62	0.21	0	0.17	0.5	0	0	0.31	0	0	0	0	0.29	0	0.12	0	0	0	0.46	0
Cfap58	0	0	0.43	0	0	0	0	0.94	0	0	0	0.1	0.88	0	0.24	0	0.23	0.54	0	0	0	0	0	0
Mob1b	0	0	0	0	0.28	0	0	0	0	0	0	0	0	0	0	0	0	0	0.1	0	0	0	0	0
Trim67	0	0.65	0	0	0	0	0.4	0	0.12	0	0	0	0	0	0	0.63	0.18	0	0	0	0	0.23	0	0
Acap2	0	0	0	0	0	0.08	0	0	0	0.14	0	0	0	0	0	0	0.22	0.1	0	0	0	0	0	0
Col18a1	0	0.74	0.81	0.71	0.9	0.01	0	0	0	0	0	0	0	0	0	0	0.21	0	0	0.58	0	0	0	0
Htr7	0.7	0.53	0.9	0.84	0.73	0.73	0	0	0	0	0	0	0	0	0	0	0.24	0	0	0	0	0	0	0
Synpr	0	0	0	0	0.82	0	0	0	0	0	0	0.66	0	0	0	0.84	0.7	0.7	0	0	0	0	0	0.38
Zfp536	0	0	0	0	0	0.17	0.79	0.41	0.79	0	0	0	0	0	0	0.71	0.68	0.03	0.05	0	0	0	0	0
Jakmip3	0	0.16	0	0	0	0	0	0	0.04	0	0.05	0	0	0	0	0	0	0.11	0	0	0	0	0	0
4930447A16Rik	0.78	0	0.17	0	0.79	0.41	0	0	0	0	0	0	0.01	0	0	0.21	0.11	0	0	0	0	0	0	0
Rasgrp2	0.48	0.4	0.29	0.41	0.2	0.35	0	0	0	0	0	0	0	0.1	0	0	0.14	0.42	0	0	0	0	0	0
Pard3bos3	0	0	0	0.94	0.19	0.23	0	0	0.62	0.31	0	0	0	0	0	0	0.71	0	0	0	0	0	0	0
Smarcc1	0	0	0	0	0.03	0	0	0	0	0	0	0	0	0	0	0	0.18	0	0	0	0.01	0	0	0
Bcl11a	0.17	0	0.5	0.43	0.86	0.48	0	0	0	0	0	0.16	0	0	0	0.1	0.03	0.08	0	0	0.79	0	0.76	0
Mpdz	0	0	0	0	0	0	0.05	0	0.08	0	0	0	0	0	0	0	0	0	0	0.1	0	0	0	0
Fam168a	0.18	0	0.15	0	0	0	0	0	0	0	0	0.04	0	0	0.06	0	0.08	0	0	0	0.11	0	0	0
Fstl5	0.86	0	0.68	0.3	0.63	0.4	0	0	0	0	0	0	0	0	0.49	0	0.53	0	0	0	0	0	0	0
Wnt5a	0	0	0	0	0	0	0.83	0	0	0	0	0.15	0.82	0.87	0.43	0	0	0	0.25	0.38	0	0.33	0	0
Wsb1	0	0.05	0	0	0	0	0	0	0	0.09	0.08	0	0	0	0	0	0.19	0	0	0.03	0	0	0	0
Sstr1	0	0.24	0	0	0	0	0	0	0	0	0	0	0.88	0.18	0.9	0	0.46	0	0	0.26	0	0	0.2	0
Zmym2	0.14	0	0	0	0	0	0	0	0	0	0	0.05	0	0	0	0	0.17	0	0	0	0	0	0	0
Sparcl1	0	0	0	0	0	0	0.01	0.12	0.22	0	0	0	0	0.18	0	0	0	0	0	0	0	0.09	0	0
Epha6	0.82	0.75	0	0	0.37	0	0	0	0	0	0.1	0	0.39	0	0.15	0	0.29	0.23	0	0	0	0	0	0.1
Ptgdr	0	0.38	0.72	0.94	0.58	0.84	0	0	0	0	0	0	0	0	0	0	0	0.39	0	0	0	0	0	0
Setdb2	0.32	0	0.59	0.72	0.95	0.46	0	0	0	0	0	0.03	0	0	0	0	0.13	0	0	0	0	0	0	0
Ppm1k	0	0	0	0	0	0	0.55	0.16	0	0	0	0	0	0	0	0	0.14	0	0	0	0	0	0	0
Egfem1	0	0	0	0	0	0	0	0	0	0	0	0.43	0.13	0	0	0	0.73	0.16	0.66	0.96	0	0	0	0
Pard3bos1	0	0	0.28	0.8	0.36	0.73	0	0	0.77	0	0	0	0	0	0	0	0.56	0	0	0	0	0	0	0
Neto2	0	0	0.56	0.77	0.59	0	0.07	0	0.03	0	0	0	0	0	0	0	0.39	0	0	0	0	0	0	0
Prkg1	0	0	0.16	0.21	0.29	0.21	0	0	0	0.1	0.22	0.23	0	0.22	0.2	0	0.02	0	0	0	0.23	0.18	0	0
Slit2	0	0	0.15	0	0	0	0	0	0	0	0	0	0	0	0.12	0	0.17	0	0.67	0.5	0.33	0.09	0.4	0.41
Efhc2	0.41	0	0	0.02	0	0	0	0	0	0.6	0	0	0.38	0	0	0	0.25	0	0.3	0.11	0	0	0	0
Ptk2	0	0	0.18	0	0	0	0	0	0.02	0	0	0	0	0	0	0	0.19	0	0	0	0	0	0	0
Kif14	0.94	0	0	0	0	0	0.12	0	0	0	0	0	0	0.14	0.28	0	0	0.33	0	0	0	0	0	0.32
Fhod3	0	0	0	0	0	0	0.44	0	0	0	0	0.14	0	0	0	0	0	0.1	0.23	0	0.1	0.17	0.2	0.22
Tprgl	0	0	0	0	0	0	0	0	0	0	0	0	0	0	0	0	0.03	0.37	0.03	0	0	0	0	0.53
Mmp24	0	0	0	0	0	0	0	0.03	0	0	0	0	0	0	0	0	0	0.04	0	0.06	0	0.01	0.19	0
Plxdc2	0.8	0.63	0	0	0.02	0	0	0	0	0.57	0	0.18	0	0	0.25	0	0	0	0	0	0	0	0	0
Rnf180	0	0	0	0	0	0	0	0	0	0	0	0	0	0	0	0	0	0.13	0	0	0	0.04	0.04	0.01
Col6a1	0	0	0	0	0	0	0.25	0.53	0.98	0.3	0.85	0	0	0	0	0	0.3	0	0	0	0	0	0	0
Fras1	0	0	0	0	0	0	0.21	0	0	0.88	0.74	0.89	0	0	0	0	0.66	0	0	0	0	0	0	0
Ctdspl	0.16	0	0	0	0	0	0	0	0	0	0	0.12	0.16	0	0	0	0	0	0	0	0	0	0.02	0
Spef2	0.39	0.71	0	0	0	0	0	0	0	0	0	0	0.83	0	0.61	0	0	0	0	0	0	0	0.05	0.17
Mettl27	0	0	0	0	0	0	0	0	0	0	0	0	0	0	0	0	0.12	0.06	0.72	0.59	0	0.21	0	0.05
Pde4a	0.5	0	0.11	0.03	0.34	0	0	0	0	0	0	0.03	0	0	0	0	0.01	0	0	0	0.14	0	0	0
Teddm2	0	0	0.44	0	0	0.03	0	0.05	0	0	0	0	0	0.48	0	0	0	0.17	0	0	0.67	0	0.05	0
4930570G19Rik	0.02	0.08	0	0	0	0	0	0	0	0	0	0	0	0	0.54	0	0	0	0	0	0	0.17	0	0
6430628N08Rik	0	0	0.84	0.2	0	0	0	0	0	0	0	0	0	0	0	0	0.06	0	0.34	0.86	0.79	0.03	0.2	0
St18	0	0	0	0	0	0	0.91	0	0	0	0	0	0	0	0	0	0.65	0.22	0.86	0.99	0	0	0	0
Arl15	0.19	0.15	0.13	0	0	0.14	0	0	0	0.11	0	0.36	0.18	0	0.05	0	0	0	0	0	0.18	0	0	0
Zfyve1	0	0.06	0	0	0	0	0	0	0	0	0	0	0	0	0	0	0	0	0	0.14	0	0	0	0.06
Chrm5	0	0	0	0	0	0	0.04	0.02	0	0.21	0.39	0.28	0	0	0	0.56	0	0.23	0.47	0.9	0	0	0	0
Spon1	0.02	0.36	0	0	0	0	0.66	0	0	0	0	0.06	0.07	0	0	0	0.42	0	0	0	0	0.14	0	0
Laptm4a	0	0	0	0	0	0	0.15	0	0	0	0	0	0	0	0	0	0.22	0	0	0	0	0	0	0
Sh3bgrl2	0	0	0	0.01	0.22	0.25	0	0	0	0.63	0.65	0	0	0	0	0	0.57	0.12	0	0	0	0	0	0
Mphosph9	0	0	0	0	0	0	0	0	0	0	0	0	0	0	0	0	0.06	0	0	0	0.15	0	0	0
Appl2	0	0.3	0.05	0.29	0.03	0	0	0	0	0	0	0	0.24	0	0	0	0	0	0	0	0	0	0	0
E130308A19Rik	0	0	0	0	0	0.02	0	0	0	0	0	0	0.03	0	0	0	0.36	0	0	0	0	0	0	0
Pank1	0.04	0	0.25	0	0	0.07	0	0	0	0	0	0	0	0	0	0	0	0	0	0	0	0	0	0
Cwc27	0	0	0	0	0	0	0.04	0	0.12	0	0	0	0	0	0	0	0.12	0.16	0	0	0	0	0	0
D430041D05Rik	0.13	0.17	0.2	0	0.3	0.12	0	0	0	0	0	0	0	0	0	0	0	0	0	0	0.18	0.1	0.2	0
Mapk10	0	0	0.12	0	0	0	0	0	0.04	0	0	0	0	0	0	0	0.1	0	0.15	0.11	0.12	0	0.11	0
1700019D03Rik	0	0	0	0	0	0	0	0.33	0	0	0.36	0	0	0	0	0.12	0.52	0	0	0	0	0	0	0
Rassf8	0	0	0.04	0	0	0	0	0	0	0.32	0	0.14	0	0	0	0	0	0	0	0	0	0	0	0.04
Igsf9	0.13	0.42	0.29	0	0	0	0	0	0	0	0	0	0	0	0	0	0.13	0	0	0	0	0	0	0.48
Galnt7	0	0	0	0	0	0	0.01	0	0	0.07	0	0.21	0	0.07	0	0	0	0	0	0	0	0	0	0
Nlk	0.12	0	0	0	0.18	0	0	0	0	0	0	0	0	0	0	0	0.26	0	0	0	0.01	0	0	0
Mt3	0	0	0	0	0	0	0.02	0	0	0	0	0	0	0.03	0	0	0	0	0	0	0	0	0	0.09
Kyat1	0	0.1	0	0.07	0	0.05	0.05	0	0.41	0	0	0	0	0	0	0	0.63	0	0	0	0	0	0	0
Bicc1	0	0	0	0	0	0	0	0.27	0	0	0	0	0	0	0.09	0	0.23	0	0	0	0	0.27	0.2	0
Hsd17b2	0	0	0	0	0	0	0	0	0	0	0	0	0.73	0	0.18	0.24	0	0	0	0.07	0	0.92	0.81	0.41
Lhfpl3	0	0	0	0	0.23	0	0	0	0	0	0.2	0.23	0	0	0.13	0	0	0	0.18	0.23	0.21	0.23	0.25	0.21
Lcor	0	0	0	0	0	0	0	0	0	0	0	0	0.15	0	0.07	0	0	0	0.1	0.03	0	0.01	0.14	0
Mamdc2	0.73	0	0.19	0.85	0.54	0.8	0	0	0	0	0	0	0	0	0	0	0.86	0	0	0	0	0	0	0
Krt17	0.64	0.45	0.92	0.12	0	0	0	0	0	0	0	0	0	0.08	0	0	0.13	0	0	0	0	0	0	0.52
Mlip	0	0.26	0	0	0	0	0	0	0	0	0	0	0.19	0	0	0	0	0	0.51	0.49	0	0.63	0.18	0
A830082K12Rik	0	0	0.46	0.24	0.37	0.32	0	0	0	0	0	0	0	0	0	0	0.1	0	0.88	0.51	0.54	0.58	0.37	0
Lemd1	0	0	0	0	0	0	0	0	0	0	0	0	0	0	0	0	0	0.55	0.81	0.56	0.57	0.73	0.66	0.93
Whrn	0	0	0.4	0	0	0.44	0.84	0	0	0	0	0	0	0	0	0	0	0	0.36	0.4	0.03	0.8	0.02	0
Spry4	0.1	0	0	0	0	0	0.75	0.16	0.4	0.38	0.49	0	0	0	0	0.66	0	0	0	0	0	0	0	0
Rab24	0	0	0.01	0	0	0	0	0	0	0	0	0	0	0	0	0	0.07	0	0.08	0	0	0	0	0.19
Rhoj	0	0.78	0.28	0	0.24	0	0	0	0	0	0	0	0	0	0	0	0.14	0	0.38	0	0	0	0	0
Klhl31	0	0	0	0	0	0	0	0	0	0	0	0	0.57	0	0	0	0.36	0.61	0	0.65	0.51	0	0.72	0.43
Lncbate1	0.87	0.87	0.44	0	0	0	0	0	0	0	0	0	0.04	0	0	0	0.04	0	0	0	0	0	0.19	0
Plod2	0	0	0	0	0	0	0.09	0	0.06	0.23	0	0	0.87	0	0	0	0.15	0	0	0	0	0	0	0
Pet100	0	0	0	0	0	0	0	0	0	0	0	0	0	0	0	0	0.02	0	0	0	0.01	0	0	0.41
Dpysl3	0	0	0	0	0	0	0	0.29	0.54	0.06	0.14	0	0	0.19	0	0.34	0.08	0	0	0	0	0	0	0
Cd93	0	0.39	0.5	0	0	0	0	0	0	0.52	0	0.18	0.36	0	0	0	0.29	0	0	0.96	0	0	0	0
Gls	0	0	0	0	0	0	0	0	0	0.02	0.05	0	0	0	0.09	0	0	0	0.02	0	0	0	0.01	0
Pstpip1	0	0	0.02	0	0	0	0	0.15	0	0	0	0	0	0	0	0	0.29	0	0.81	0.94	0.38	0	0	0
Tecr	0	0	0.03	0	0	0	0.13	0	0.1	0	0	0	0	0.1	0	0	0.08	0	0.01	0	0	0	0	0.18
5430403G16Rik	0	0	0	0	0	0	0.06	0	0.3	0.26	0	0	0	0	0	0.72	0.25	0.19	0	0.01	0	0	0	0
Ackr3	0	0	0.52	0.66	0	0	0.14	0	0	0	0	0	0	0	0	0	0	0	0.03	0.39	0.41	0	0.65	0.26
2510009E07Rik	0	0	0	0	0.18	0.13	0	0	0	0	0	0	0	0	0	0	0.11	0	0	0	0.41	0	0	0
Hells	0	0	0.53	0	0.66	0.01	0	0	0	0	0	0.01	0	0	0	0	0	0	0	0	0	0	0.01	0
Slc7a8	0	0	0	0	0	0	0	0	0	0	0	0	0	0.25	0	0.15	0.53	0.12	0.45	0.02	0	0.46	0.12	0
Col12a1	0.05	0	0.99	0.94	0.11	0	0	0	0	0	0	0	0	0	0	0	0.03	0	0	0	0	0	0	0
Ccdc82	0.05	0.1	0	0	0	0	0.09	0	0.31	0	0	0	0.09	0	0	0	0.04	0	0	0	0	0	0	0
Cttnbp2	0	0	0	0	0.06	0.21	0	0	0	0	0	0	0	0	0.01	0.05	0.06	0.2	0.2	0	0.21	0	0.19	0.09
Elk3	0	0	0	0	0	0	0	0	0	0	0	0.08	0	0.07	0	0	0.09	0	0.23	0.34	0	0.74	0	0
Klhdc10	0.11	0	0.13	0.01	0.17	0	0	0	0	0	0	0	0	0	0.04	0	0	0.12	0	0	0.16	0	0	0
Dennd4c	0	0	0	0	0	0	0	0	0	0.27	0	0.14	0	0	0	0	0	0	0	0	0	0	0	0.04
Stox2	0	0	0	0	0	0	0	0	0.14	0	0	0.02	0	0	0	0	0.08	0	0	0	0	0	0	0
Prlr	0.67	0.4	0.81	0.52	0.47	0.43	0	0	0	0	0.44	0	0.07	0	0.1	0	0	0	0	0	0	0	0	0
Sox1	0	0	0	0	0	0	0.13	0.11	0	0	0.25	0	0	0.06	0	0.14	0	0	0.29	0.6	0	0	0	0
Ap2a2	0	0	0	0	0	0	0.03	0	0.11	0	0	0	0	0.05	0	0	0.02	0	0	0	0	0	0	0
Ttc4	0	0.12	0	0	0	0	0.13	0	0	0	0	0	0	0	0	0	0.23	0	0	0	0	0	0	0
Snhg20	0	0	0	0	0	0	0	0	0	0	0.02	0	0.13	0	0	0.08	0.26	0.02	0	0	0	0	0	0
B230307C23Rik	0	0	0	0	0	0	0	0	0.09	0.11	0	0	0	0	0	0	0	0	0	0.02	0	0	0.2	0
Ptpn5	0	0	0	0.16	0.11	0	0.14	0	0.14	0.18	0.02	0.01	0	0.08	0	0.06	0	0	0	0	0	0	0	0
Dip2b	0	0	0.1	0	0	0	0	0	0	0	0	0	0	0	0	0	0.12	0	0.01	0	0	0	0.09	0
Cachd1	0	0	0	0.14	0	0.29	0.83	0	0	0	0	0	0	0.38	0	0.14	0.32	0.7	0	0	0	0	0	0
Asic2	0	0.22	0.06	0	0	0.15	0.22	0	0	0.23	0.2	0.24	0.17	0	0.14	0	0.15	0.02	0	0	0	0	0.23	0
Sox4	0.19	0.42	0	0	0	0	0	0	0.51	0	0	0	0	0	0	0	0.11	0	0	0	0	0.02	0	0
A230006K03Rik	0	0.02	0	0.19	0	0.19	0.02	0	0	0	0	0	0	0	0	0.08	0.14	0.19	0.01	0	0.12	0	0.14	0
Matk	0	0	0.08	0	0	0	0	0	0	0	0	0	0	0	0	0	0.16	0	0.11	0.15	0.11	0.11	0	0.2
Acvr2a	0	0	0.08	0	0	0	0	0	0	0.01	0	0.55	0.17	0	0.28	0	0	0	0	0	0.27	0.07	0	0
Nt5e	0.23	0	0	0	0	0	0	0	0	0	0	0.71	0	0	0	0.17	0.1	0	0	0	0	0	0	0
4930430E12Rik	0	0	0	0	0	0.72	0	0	0	0	0	0	0	0	0	0	0	0	0	0	0	0	0	0
Edaradd	0	0	0	0	0	0	0	0	0	0.69	0	0.97	0.44	0.46	0	0	0	0	0	0	0	0.23	0	0.89
Nxpe4	0	0	0.05	0	0	0	0	0	0	0	0	0	0	0	0	0	0.21	0	0.5	0.45	0	0	0.56	0
Zfp385b	0	0	0	0.17	0.17	0.02	0	0	0	0.46	0.18	0.11	0.21	0	0	0.19	0	0.63	0.12	0.24	0	0	0	0
Ccdc30	0	0	0.08	0	0	0	0	0	0	0	0	0	0	0	0	0	0.09	0	0	0.04	0	0	0.04	0
Zfp57	0.17	0.47	0	0	0.53	0	0	0	0	0	0	0	0.12	0	0	0.02	0.22	0	0	0	0	0	0.16	0
Lgr5	0	0	0	0	0	0	0.97	0	0.77	0	0	0	0	0.11	0	0	0	0	0.83	0.55	0	0.51	0	0
Dmd	0.23	0.2	0	0	0.19	0.21	0	0	0.13	0.23	0.1	0	0	0	0	0.18	0.03	0	0.23	0.23	0.11	0	0.21	0
Fuca1	0	0	0	0	0	0	0	0	0	0	0	0	0	0	0	0	0.05	0	0.21	0.27	0	0	0	0.72
Ajap1	0	0	0	0.16	0.08	0.01	0	0	0	0	0	0.17	0.01	0	0	0	0	0	0.05	0	0.11	0	0.26	0
Jam3	0	0	0	0	0.02	0	0	0	0	0	0	0	0	0	0	0	0	0	0.03	0.03	0.04	0	0.01	0
Slc38a2	0.08	0	0	0	0	0	0	0	0	0	0	0	0	0	0	0.03	0.03	0	0	0	0	0.01	0	0
Lncenc1	0.96	0.98	0	0	0	0	0	0	0	0	0	0	0	0	0.77	0	0.14	0	0	0	0	0	0	0
Npy5r	0	0	0.83	0.44	0	0	0	0	0	0	0	0	0	0	0	0	0.39	0	0.53	0.5	0	0.62	0	0
Dalir	0	0	0	0	0	0.85	0	0	0	0	0	0	0	0	0	0	0.39	0	0	0	0.91	0	0	0
Unc5c	0	0	0.14	0.2	0	0	0.24	0	0	0	0	0	0	0	0.17	0	0.1	0	0.19	0.19	0	0.13	0.28	0.15
Plch2	0	0.13	0	0	0	0.21	0	0	0	0	0	0	0.15	0	0.52	0	0	0	0	0	0	0	0.14	0.03
A830092H15Rik	0	0	0	0	0	0	0	0	0	0	0	0	0	0	0.01	0	0	0	0	0	0.64	0	0.36	0
Arhgef6	0	0	0.08	0	0	0.42	0	0	0.07	0	0	0	0	0	0.06	0	0.17	0	0	0.59	0	0	0	0
Nr5a1	0	0	0	0	0	0	0.53	0	0.04	0	0	0	0	0	0	0	0	0.49	0.72	0.11	0.22	0.07	0.31	0.49
Dtnbos	0	0	0	0	0	0	0	0	0	0	0	0.43	0	0.08	0	0	0.22	0	0	0	0	0	0	0
Spink10	0.06	0	0	0	0	0	0	0	0	0.1	0	0.07	0	0	0	0.11	0	0.12	0	0	0.04	0	0	0
Daam2	0.24	0.81	0	0	0	0	0	0	0	0	0	0	0.92	0	0	0	0.42	0	0	0	0.06	0	0	0.36
Ppm1m	0.5	0.27	0.54	0.25	0.53	0	0.12	0	0	0	0	0	0	0	0	0	0.17	0	0	0	0	0	0	0
Adam11	0.08	0	0.11	0.22	0.12	0.03	0	0	0	0	0	0	0	0	0	0	0.01	0	0	0	0	0	0.07	0
Syne2	0	0	0	0.36	0	0	0	0	0	0	0	0	0	0	0	0.05	0.04	0	0.31	0.24	0	0	0.52	0.12
Zar1l	0	0.38	0	0	0	0	0	0	0.49	0	0.97	0	0	0.34	0	0	0.12	0.38	0	0	0	0	0	0
Grip1os2	0	0	0.04	0	0.14	0	0	0	0	0	0	0	0	0	0	0	0.13	0	0.68	0.4	0.31	0	0.8	0
Tmem71	0	0	0.94	0	0.04	0	0	0	0	0	0	0.52	0	0.54	0	0	0	0	0	0.45	0	0	0.61	0
Lhx5	0.77	0.61	0	0	0	0	0.11	0	0.42	0.28	0.43	0	0.41	0.54	0	0.07	0	0	0	0.1	0	0	0	0
Epb41	0	0.1	0	0	0	0	0	0	0	0	0	0	0	0	0.13	0.05	0	0.15	0	0	0.1	0.04	0	0
Pbk	0	0	0	0	0	0	0	0	0	0	0	0	0.52	0	0	0.25	0.23	0	0.5	0.51	0.21	0	0.25	0.88
Slc30a6	0	0	0	0	0	0	0	0	0	0.15	0.2	0	0	0	0	0	0.01	0	0	0	0	0	0	0.11
Bach2	0.13	0.45	0	0.4	0.01	0	0.08	0.08	0	0	0	0	0.38	0	0	0.05	0.41	0	0	0	0	0	0	0
Fam20c	0	0	0	0	0	0	0	0	0	0	0	0	0	0	0	0	0.28	0	0.14	0	0	0.2	0.06	0.26
Synpo	0.01	0	0.1	0	0	0	0	0	0	0	0	0	0	0.05	0	0	0	0.28	0.05	0.62	0	0.02	0	0.04
Steap3	0	0	0	0	0	0	0.13	0	0	0	0	0.83	0	0	0	0	0	0	0.09	0.16	0.71	0.66	0.51	0.09
Atp6v1c2	0	0	0	0	0	0	0	0	0	0.77	0	0.63	0	0	0.1	0	0.04	0	0.17	0.48	0.24	0.37	0	0
Crocc	0	0.06	0	0	0.04	0	0	0	0	0	0	0	0	0	0	0	0.01	0	0	0	0.1	0	0	0
Greb1l	0	0	0	0	0.58	0	0.13	0.23	0.23	0.1	0	0	0	0.06	0	0	0	0.17	0	0	0	0	0	0
Col19a1	0	0.86	0.3	0	0	0	0	0	0	0	0.73	0	0	0	0	0	0.17	0.09	0	0	0	0	0.14	0.29
Efemp1	0	0	0	0	0.18	0	0	0	0	0	0	0	0	0	0.98	0	0.07	0.05	0	0	0.87	0	0	0.94
4930562D21Rik	0	0	0.89	0.91	0	0	0	0	0	0	0	0	0	0	0	0	0.65	0	0	0	0	0	0	0
Olfr1406	0	0	0	0	0	0	0	0	0	0.94	0.27	0.3	0	0	0	0.88	0	0.57	0	0	0.08	0.16	0	0
St8sia2	0	0.15	0	0	0	0	0	0	0	0	0	0	0	0	0	0	0.11	0	0.94	0.92	0.46	0.13	0.51	0.16
Asrgl1	0	0	0	0	0	0	0.11	0	0	0	0	0	0	0	0	0	0.06	0	0	0	0.7	0	0	0
Zfp644	0	0	0	0	0	0	0	0	0	0	0.08	0	0	0	0	0	0	0.09	0	0	0	0	0	0
Slc35f1	0.01	0	0.22	0.26	0.16	0.22	0	0.06	0	0.07	0.14	0.12	0	0.21	0.19	0.09	0.11	0.23	0	0	0.19	0	0	0
4732463B04Rik	0	0	0	0	0.44	0	0	0	0.11	0	0.05	0	0	0	0	0	0.3	0	0	0	0	0.06	0	0
Myo6	0	0	0	0	0	0	0	0	0	0	0	0	0.22	0	0	0	0.14	0	0.09	0.18	0.02	0.23	0	0
Snx29	0	0	0	0	0	0	0.09	0	0.06	0	0	0	0	0	0	0	0.18	0.13	0	0	0	0	0	0
Camk1g	0	0	0	0	0	0	0	0.1	0	0	0	0.37	0	0	0	0	0	0	0.58	0.27	0.07	0.38	0.27	0.05
Garnl3	0.07	0.07	0	0	0	0	0.23	0	0	0	0	0.15	0	0	0	0	0.06	0.12	0	0.05	0	0.16	0	0
Nol4l	0	0	0	0	0	0	0	0	0	0	0	0	0	0	0	0	0	0	0	0.08	0.2	0	0	0.02
Ptprg	0	0.23	0.17	0.19	0.21	0.23	0	0	0	0.4	0.24	0.11	0	0	0	0	0	0.21	0	0	0.09	0	0	0.04
Armcx3	0	0	0	0	0.26	0	0.07	0	0	0	0	0	0	0	0	0	0.08	0	0.28	0.02	0	0	0	0.01
C130060K24Rik	0	0.58	0	0	0	0	0	0	0	0	0	0	0.62	0.89	0	0	0.26	0.16	0	0	0	0	0	0.03
Ppp1r12c	0.13	0.15	0	0	0	0.01	0	0	0	0	0	0	0	0	0	0	0.02	0.09	0	0	0	0	0	0
Grem2	0	0	0	0	0	0	0	0	0	0	0	0.14	0.71	0	0.22	0	0.11	0.87	0	0	0	0.14	0	0
Pls3	0	0	0	0	0	0	0	0	0	0	0	0.03	0	0	0.17	0	0.25	0	0.37	0.16	0	0.42	0	0.32
Tmem132c	0.1	0	0.63	0	0.83	0	0.71	0	0	0	0	0	0.51	0	0	0	0	0	0	0	0	0.61	0	0
Pde3a	0	0	0	0	0	0	0	0	0.23	0.94	0.86	0.02	0.42	0	0	0	0.1	0	0.84	0.04	0	0	0	0
Cbln2	0.14	0.67	0.25	0.1	0.81	0	0	0	0	0	0	0	0	0.81	0	0	0.57	0	0	0	0	0	0	0
Kazn	0.03	0	0.03	0.11	0.1	0.14	0	0	0	0	0	0	0	0	0.32	0	0	0.04	0	0	0	0	0	0
Ank	0	0	0	0	0	0	0	0.05	0	0	0	0	0	0	0	0	0	0.03	0	0	0.08	0.16	0.03	0
Pou3f3	0	0	0	0	0	0.95	0	0	0	0	0.2	0	0	0	0	0	0.2	0.87	0	0	0.87	0	0	0
Atp1b2	0	0	0	0	0	0	0.18	0.31	0	0	0	0	0	0.03	0	0	0.3	0	0	0	0	0	0	0
Bag3	0	0.16	0.23	0.34	0	0	0.14	0	0	0	0	0.93	0	0	0.52	0	0.65	0	0	0	0	0.41	0	0
Lysmd4	0	0.09	0	0	0	0	0.16	0.02	0	0	0	0	0	0	0	0	0	0	0	0	0	0	0	0
Mir124-2hg	0.12	0.58	0.16	0.09	0	0.35	0	0	0	0	0.47	0	0	0	0	0.43	0.41	0.55	0	0	0.42	0	0.4	0.5
Slc8a1	0.18	0	0	0	0	0	0.06	0	0.06	0.18	0.16	0	0	0	0.22	0.07	0.04	0.08	0	0	0	0	0	0
Eps8	0.4	0	0	0	0	0	0	0	0	0	0	0	0	0	0	0	0	0	0.65	0	0.1	0.1	0.33	0
Adcy8	0.92	0.79	0	0	0	0	0.53	0	0	0.15	0	0	0.54	0.06	0.47	0.5	0.47	0	0	0	0	0	0	0
Vav2	0	0	0	0.84	0	0	0.5	0	0.4	0	0	0	0	0	0	0	0.04	0	0	0.05	0	0	0	0
Slx4ip	0.07	0	0	0	0	0	0	0	0	0	0	0	0	0	0	0	0.16	0	0	0	0	0	0	0
Aifm3	0.02	0	0	0	0	0.12	0	0	0	0	0	0	0	0.02	0	0	0.35	0.26	0	0	0	0.04	0	0
Zfp804a	0.82	0.44	0	0	0.73	0	0.7	0	0.27	0	0	0	0.21	0.44	0.67	0	0.15	0	0	0	0	0	0	0
Lpar3	0	0	0	0	0	0	0.04	0	0.4	0.12	0	0.99	0	0	0	0	0	0	0	0	0.17	0	0	0
Slc35f6	0	0	0	0	0	0	0.3	0.58	0	0	0.03	0.08	0	0.08	0	0	0.18	0	0	0.12	0	0	0	0
Syt14	0	0	0	0	0.1	0	0	0	0	0.02	0	0	0	0	0	0	0	0	0	0	0	0	0	0
Jhy	0.3	0.02	0.07	0.32	0.02	0	0	0	0.32	0.27	0.89	0	0	0	0	0	0.22	0	0	0	0	0	0	0.01
Kcnip1	0	0	0	0	0	0	0.25	0	0	0.18	0.1	0.27	0	0.18	0	0	0.19	0.23	0.22	0.29	0	0	0	0.23
Nox4	0.07	0	0.08	0	0	0.3	0	0	0	0.51	0.89	0	0.42	0	0.67	0.74	0	0	0	0	0.15	0	0	0
Scg2	0	0.2	0.16	0.11	0.05	0	0.14	0.08	0	0	0	0	0	0.2	0.03	0.19	0.19	0	0	0	0	0	0	0
Araf	0.19	0.04	0	0.05	0	0	0	0	0.17	0	0	0	0	0	0	0	0.15	0	0	0	0	0	0	0
Paip2	0.12	0	0	0	0	0	0	0	0	0.15	0	0.07	0	0	0	0	0	0	0	0	0	0	0	0
Fnbp1	0.15	0.17	0	0	0	0	0	0.05	0	0	0	0	0	0	0.08	0	0.15	0.12	0	0	0	0	0	0
6030443J06Rik	0	0	0	0	0	0	0	0	0	0	0	0.62	0	0	0	0	0.2	0	0	0	0	0	0	0
Lnx1	0	0	0	0	0	0	0.06	0	0	0	0	0	0	0	0.08	0	0.01	0	0.24	0.24	0	0.51	0	0
Wwp1	0	0	0	0	0	0	0	0.12	0	0	0	0	0	0	0	0	0	0.07	0	0	0	0.13	0.28	0.22
Galnt1	0	0	0	0	0	0	0	0	0.08	0.24	0.01	0.02	0.11	0	0	0	0	0	0	0	0	0.1	0	0
Pnpla3	0.27	0	0	0.3	0.24	0.06	0	0	0	0	0	0	0	0	0	0	0	0	0	0	0	0	0	0
Zfp618	0	0	0	0	0	0	0	0.16	0	0.12	0.16	0	0.19	0	0	0	0	0	0.07	0.14	0	0	0	0.09
Ccnd2	0.39	0	0.34	0.45	0.39	0.1	0.41	0.17	0	0	0	0	0	0.51	0.82	0	0.19	0	0	0	0	0	0	0
Ubb	0	0	0	0	0	0	0.21	0.16	0.17	0	0	0	0	0.2	0	0	0	0	0.04	0	0	0	0	0.01
Moxd1	0	0	0	0	0.94	0	0	0	0.73	0	0	0	0	0	0	0.71	0.54	0	0	0	0	0.16	0	0
Nrg3os	0	0	0	0	0	0	0	0	0	0.1	0.14	0.11	0	0	0	0	0.11	0.23	0.25	0.23	0.21	0.23	0.17	0.22
Wipf3	0	0	0	0	0	0	0	0	0	0	0	0.72	0	0	0	0	0.08	0	0	0	0.39	0	0	0
Gclc	0	0	0	0	0	0	0	0	0	0.08	0.1	0	0	0	0	0	0	0	0	0	0	0.05	0	0
Timp3	0.05	0	0	0	0	0	0.2	0	0	0	0	0	0	0	0	0	0.17	0	0	0	0	0	0	0
Nkx2-2os	0	0	0	0	0	0.49	0	0	0	0	0	0	0	0	0	0.16	0.14	0.77	0	0	0.72	0	0.19	0.91
Mhrt	0	0	0.53	0	0	0	0	0.15	0	0	0	0	0	0.55	0	0	0	0	0	0.25	0.26	0	0.01	0
Fmnl2	0	0.06	0	0	0	0	0.17	0.04	0	0.07	0.07	0	0	0.12	0.06	0	0.14	0.04	0	0	0	0	0	0
Camkk2	0	0	0	0	0	0	0.15	0.02	0	0	0	0	0	0.14	0.1	0	0	0.24	0.01	0	0.42	0.34	0	0.09
Gpr88	0.82	0.07	0	0	0.3	0.61	0	0	0	0	0	0	0	0.43	0.59	0	0	0	0	0	0.34	0	0	0.37
Fam107a	0.61	0.18	0	0.37	0.15	0	0	0	0	0	0	0	0	0	0.26	0	0.08	0	0.12	0	0.51	0	0	0
Plscr4	0	0	0	0	0.03	0.07	0	0.24	0	0.44	0	0.42	0.18	0	0	0	0.29	0	0	0	0.62	0	0	0
Syt6	0	0	0.36	0	0.62	0.54	0	0	0	0	0.15	0	0	0	0	0	0.06	0	0	0	0.94	0	0	0.04
Sh3bp5	0	0.28	0	0	0	0	0	0.11	0	0.04	0	0	0	0	0	0	0.03	0.18	0	0	0	0	0	0
Snx25	0	0	0	0	0	0	0	0	0	0	0.07	0.07	0	0	0	0	0	0.13	0	0	0.05	0	0	0
Rgs6	0	0	0	0	0	0	0	0.91	0.91	0.76	0.62	0	0	0	0	0	0.08	0	0	0	0	0	0	0
Nr1h4	0	0	0	0	0	0	0.97	0	0.96	0	0	0	0	0	0	0	0	0	0	0.12	0	0	0	0
Ino80	0	0	0	0	0	0	0	0	0	0	0	0.05	0	0	0	0	0.13	0	0	0.07	0	0	0	0
Itga7	0	0	0.89	0	0	0	0.63	0	0.25	0	0	0	0	0	0	0	0	0.13	0	0	0.36	0	0	0.37
Sorbs2os	0	0	0	0	0	0	0.1	0	0	0.11	0	0	0	0.13	0.11	0	0.01	0	0.2	0.12	0.04	0.58	0	0
A830011K09Rik	0	0	0	0	0	0	0	0	0	0	0	0.97	0.01	0	0.03	0	0	0	0	0	0.33	0.16	0.04	0.09
Cfap46	0	0	0	0	0	0	0.08	0.11	0	0	0	0	0	0	0	0	0	0.11	0.03	0.11	0	0.06	0	0
Arpp21	0	0.07	0.22	0	0	0	0	0	0	0	0.19	0	0.06	0.27	0.26	0	0	0	0	0	0.02	0.23	0.2	0.2
B630019K06Rik	0	0	0	0	0	0	0	0	0	0	0	0	0	0	0	0	0.11	0	0.08	0	0	0	0	0.75
Peli2	0.38	0	0	0	0.64	0	0.22	0	0	0	0	0	0	0	0	0	0	0	0	0	0.06	0	0	0
Dlx6os1	0	0	0	0	0	0	0	0	0	0	0	0	0	0	0	0.42	1	0	0	0	0	0	0	0
Igsf3	0.56	0	0	0.27	0.21	0.57	0	0	0	0	0	0.15	0	0	0	0	0.45	0	0	0	0.07	0	0	0
Htr2a	0	0	0.37	0	0	0.16	0	0	0.34	0	0.59	0.45	0	0	0	0	0	0	0	0	0	0.17	0	0
Sumo1	0.08	0	0	0	0	0	0	0	0	0	0	0	0	0	0.12	0	0.16	0	0	0	0	0	0	0
Esyt3	0	0	0	0	0	0	0	0	0	0	0	0	0	0	0	0	0.04	0	0.82	0.65	0.19	0.42	0.37	0.45
Dcbld2	0	0.01	0	0.04	0	0	0	0	0	0	0	0	0	0	0	0	0	0.18	0.02	0	0	0	0	0
Cyp19a1	0.54	0.86	0.27	0.81	0.91	0.14	0	0	0	0.08	0	0	0	0	0.37	0	0.51	0	0	0	0	0	0	0
Phldb1	0	0	0	0	0.17	0.02	0	0	0	0	0	0	0	0	0	0	0.26	0	0.16	0.03	0	0	0	0
Cidea	0	0.41	0	0	0	0	0.12	0	0.84	0.44	0	0.24	0.67	0	0	0	0.16	0	0	0	0	0	0	0
Whamm	0.11	0.04	0	0	0	0	0	0	0	0	0	0	0	0	0	0	0	0.13	0	0	0	0	0	0
Sirpa	0	0	0	0	0	0	0.22	0	0	0	0	0	0	0	0	0.12	0	0	0	0	0	0	0	0
Arl3	0.11	0.07	0	0	0	0	0	0	0	0	0	0	0	0	0	0	0	0	0	0	0	0	0	0
Dsel	0.09	0	0	0	0	0	0	0	0	0.62	0	0.08	0	0	0	0	0.19	0	0	0	0	0	0	0
Arhgef2	0	0	0	0	0	0	0	0	0	0	0	0	0	0	0	0	0.1	0.14	0	0	0	0	0.22	0.67
Stard5	0	0	0	0	0	0	0.79	0	0	0	0	0.68	0	0	0	0	0.2	0	0	0	0	0	0	0
Gng2	0.1	0	0	0	0.08	0	0	0	0	0.12	0	0.03	0.13	0	0	0	0	0.02	0	0	0	0	0	0
Robo2	0.22	0	0	0	0	0.18	0.16	0.09	0	0.34	0.34	0.1	0.11	0.26	0.21	0.22	0	0.23	0	0	0	0	0	0
Tbl1xr1	0	0	0	0	0	0	0	0	0	0.72	0.29	0	0	0	0.03	0	0	0	0	0	0	0	0	0
Btbd3	0	0	0	0	0	0	0	0	0.05	0	0	0	0	0	0	0	0.1	0	0	0.35	0	0	0	0
Fignl2	0.14	0.97	0.03	0	0	0	0	0	0.31	0	0.41	0.54	0	0	0	0	0.4	0	0	0	0.55	0	0	0
Tmem164	0.26	0	0	0	0.01	0	0.42	0	0.2	0.04	0.02	0.32	0	0	0	0	0.22	0	0	0	0	0	0	0
Slc8a2	0	0.05	0	0	0	0	0	0	0	0	0.06	0	0	0	0	0	0	0	0.05	0	0	0	0	0
Kcnip3	0	0	0	0	0	0	0.92	0.7	0.8	0	0.34	0	0	0.34	0	0	0	0	0	0	0	0	0	0
Esm1	0.59	0.46	0.18	0.45	0.26	0.12	0	0	0	0	0	0	0.35	0	0	0	0.2	0	0	0	0.02	0	0.12	0
Hs3st2	0	0	0	0.1	0	0	0	0.14	0	0	0.41	0	0	0	0	0.16	0.07	0	0.04	0.18	0	0.68	0.93	0
B3glct	0	0	0	0	0	0	0.09	0	0	0	0.02	0.06	0	0	0	0	0	0	0.74	0.69	0	0	0	0
Ppfibp1	0	0	0.18	0	0	0	0	0	0	0.36	0.49	0.03	0.11	0.02	0.15	0	0	0	0	0	0	0	0	0
Sgsm1	0.11	0.13	0	0.05	0.06	0	0	0	0	0	0	0	0	0	0	0	0.01	0	0	0	0	0	0	0
E230001N04Rik	0	0	0	0	0	0	0	0.2	0.04	0	0	0.56	0	0	0	0	0.14	0	0	0	0.01	0	0	0
Itm2a	0.03	0	0.82	0.54	0	0.93	0	0	0	0	0	0	0	0	0	0	0.17	0	0	0	0	0	0	0
E130307A14Rik	0.04	0.03	0	0	0.05	0	0	0.09	0	0.1	0	0.05	0	0	0	0	0.05	0.06	0	0	0	0	0	0
Izumo4	0.23	0.18	0	0	0	0	0	0	0	0	0	0	0.06	0	0	0	0.17	0	0	0	0	0	0	0
Syt1	0.24	0.19	0.21	0	0.2	0	0.19	0.23	0.21	0	0	0	0.21	0.24	0.24	0	0.19	0	0.23	0	0.22	0.22	0	0
Sema5a	0	0	0	0	0	0	0	0.76	0.24	0	0.55	0	0	0	0.04	0	0	0	0.37	0.53	0	0.43	0	0
Ltbp1	0	0	0	0	0	0	0	0.26	0.73	0	0.36	0	0	0	0	0	0.04	0	0	0	0	0.77	0.57	0.7
Rps6ka6	0.96	0.95	0	0	0	0	0	0	0	0	0	0	0.31	0	0	0	0.17	0	0	0	0	0	0	0
Adgrb2	0	0	0	0	0	0	0	0.02	0	0.09	0.05	0	0	0	0	0	0	0	0	0	0.1	0.02	0	0
Syt13	0	0	0	0	0	0	0	0	0	0	0	0	0.07	0	0.07	0	0	0.05	0	0	0.4	0.15	0.21	0.13
Trbc2	0.17	0.43	0.9	0.79	0	0	0	0	0	0	0	0	0	0	0.83	0	0.09	0	0	0	0.03	0	0	0
Dysf	0	0	0	0	0	0	0	0	0	0.56	0	0.79	0.28	0	0	0	0.14	0	0	0	0	0	0.5	0.62
Tcf20	0.08	0.02	0	0.03	0.16	0	0	0	0	0.04	0.06	0	0	0	0	0	0.14	0.01	0	0	0	0	0	0
Trib2	0.37	0.42	0.19	0	0.31	0	0.13	0	0	0	0.02	0	0	0.26	0	0.03	0.23	0	0	0	0	0	0	0
A830031A19Rik	0	0	0.17	0	0.31	0.46	0	0	0	0	0	0.8	0	0	0	0.65	0	0.85	0	0	0.59	0	0.35	0
Vgll2	0.67	0.13	0	0	0	0	0.46	0	0	0	0	0	0.43	0.92	0	0	0	0.95	0.92	0	0	0	0	0
Prim2	0	0	0	0	0	0.68	0	0	0	0	0	0	0.05	0	0	0	0	0	0	0	0.53	0	0	0
Nr2f1	0	0	0.4	0.13	0.47	0	0	0	0	0	0	0	0	0	0	0	0.06	0	0.88	0.03	0.39	0.59	0.48	0
Cdon	0	0	0	0	0	0	0	0	0	0	0	0.13	0	0	0	0	0.07	0.1	0.64	0.15	0.03	0	0	0
Prr16	0	0	0	0	0	0	0.29	0	0	0	0	0	0	0	0	0	0.1	0	0.72	0.67	0	0.74	0.83	0
Mad1l1	0	0	0	0	0	0	0	0	0	0	0	0	0	0.05	0	0	0.16	0	0	0.05	0	0	0	0.16
Itpr2	0	0	0	0	0	0	0	0	0	0	0	0	0	0	0	0	0.04	0	0	0.58	0	0	0.38	0
Gkap1	0	0	0	0	0	0	0	0	0	0	0	0	0	0	0	0	0	0	0.28	0.17	0.12	0.15	0	0
Cdk17	0	0	0.38	0	0.06	0	0	0	0	0.18	0	0.38	0	0.09	0.17	0	0	0	0	0	0	0	0	0
Snx32	0	0	0	0	0	0	0	0	0	0	0	0	0	0	0	0	0.12	0	0	0.03	0	0	0.01	0.03
Parvb	0.41	0	0	0	0	0	0.04	0	0	0	0	0	0	0	0	0	0.53	0	0	0	0	0	0	0.07
Dhx32	0	0	0	0	0	0	0	0	0	0	0	0.03	0	0	0	0	0	0.05	0.05	0	0	0.01	0	0
Sltm	0.08	0.06	0.04	0	0.16	0	0	0	0	0	0	0	0	0	0	0	0.19	0	0	0	0	0	0	0
Hmcn1	0	0	0	0	0	0.36	0	0	0	0	0	0	0	0.1	0	0.71	0.87	0.75	0	0	0	0	0	0
Grid2	0.22	0	0	0	0	0.13	0.21	0.18	0.22	0.2	0.11	0.17	0.19	0	0.04	0.23	0.01	0.22	0.23	0.08	0	0.19	0.14	0.23
Trim36	0.12	0	0.03	0.66	0.96	0.83	0	0	0	0	0	0	0	0	0	0	0	0	0	0	0.19	0	0	0
Elavl2	0.18	0.42	0.03	0.1	0.35	0.09	0	0	0.52	0	0.2	0	0	0	0	0.26	0.37	0.38	0	0	0	0	0	0
Skap2	0	0.36	0	0	0	0	0	0	0	0	0.04	0	0	0	0	0.22	0.09	0.41	0	0	0.19	0	0	0.91
Micu1	0	0	0.05	0	0	0	0	0	0	0	0	0	0	0	0.04	0	0.1	0	0	0	0	0	0	0
Slc38a1	0	0	0	0	0	0	0	0.05	0.11	0	0	0	0.06	0	0	0	0.08	0	0	0	0	0	0	0
Ifi35	0	0	0.88	0.54	0	0	0	0	0	0	0.3	0.24	0	0	0	0	0.59	0	0	0	0	0	0	0
Rapgef2	0	0	0	0	0	0	0	0	0	0	0	0	0	0	0	0	0	0.2	0.13	0	0.04	0	0	0
Limk1	0.14	0.02	0	0.03	0.11	0.46	0	0	0.19	0	0	0	0	0	0	0.09	0.13	0	0	0	0	0	0	0
Ndufs4	0.03	0	0	0	0	0	0	0.15	0	0	0	0	0.03	0	0.11	0	0	0	0	0	0	0.19	0	0
Tacstd2	0	0.17	0.08	0.24	0	0	0	0.47	0	0	0.84	0	0	0	0	0	0	0	0	0.88	0	0	0	0
Sntb1	0	0	0	0	0.04	0.27	0	0.2	0	0	0	0	0	0.44	0.45	0	0.07	0	0	0	0.28	0.26	0	0
Ptpn13	0	0	0.93	0.82	0	0	0	0	0	0.04	0	0	0	0	0	0	0.11	0	0.01	0	0	0	0	0
Lamp2	0	0	0	0	0	0	0	0	0	0	0	0	0	0	0	0	0.13	0	0	0.07	0.1	0	0	0
1700060C16Rik	0	0	0.53	0	0	0	0	0	0	0	0	0.79	0	0	0	0.95	0	0	0	0	0.01	0.22	0	0.51
Isl1	0	0	0	0	0.91	0	0	0	0	0	0	0.86	0	0.25	0	0	0.54	0.76	0	0	0	0	0	0
Grik2	0.24	0.23	0.23	0.16	0	0.22	0.22	0	0	0	0	0	0.23	0.23	0.24	0	0.18	0	0	0	0.11	0.18	0.15	0
Ubash3b	0.09	0	0	0.37	0.32	0.69	0.04	0	0	0	0	0	0	0	0	0.07	0.19	0	0	0	0.03	0	0	0
Maf	0	0	0	0	0	0	0	0	0	0	0	0	0.66	0.52	0.95	0	0.14	0	0	0	0.85	0.3	0	0.81
Ptk2b	0	0	0.08	0	0.08	0	0	0	0	0.01	0	0.63	0	0	0.01	0	0	0	0.56	0.81	0.89	0.02	0	0
Kcnj2	0.71	0.22	0.73	0.29	0	0	0	0	0	0.2	0	0	0	0.43	0.37	0	0	0	0	0	0	0	0	0
Armc2	0	0	0.01	0.01	0	0	0	0.01	0	0	0	0	0	0	0	0	0	0	0	0	0	0.03	0	0
Adssl1	0.36	0.53	0	0.07	0	0	0	0	0.43	0	0	0	0.04	0	0	0	0.32	0	0	0	0	0	0	0
Mcf2l	0.13	0.08	0	0	0	0	0	0	0	0	0	0	0	0	0.11	0	0.1	0.09	0	0	0.06	0	0	0
Ablim3	0.03	0.06	0	0	0.21	0.05	0	0	0.08	0	0	0	0	0	0	0	0.03	0	0	0	0	0	0	0
Zfp810	0	0	0.01	0	0.31	0	0	0	0	0	0	0	0	0	0	0	0.06	0	0	0	0	0	0	0
4930426D05Rik	0	0	0.94	0.94	0	0.14	0.01	0	0.82	0	0	0	0	0	0	0	0	0	0	0	0	0	0.04	0
Arid4b	0.17	0	0	0	0	0	0	0	0	0.03	0	0	0	0	0	0	0.17	0	0	0	0	0	0	0
Trmt2b	0	0	0	0	0	0	0	0	0	0	0	0	0.03	0.77	0.15	0	0.03	0	0	0.23	0	0	0	0
Evi5	0	0.01	0	0	0	0	0.17	0	0	0	0.04	0	0	0	0	0	0	0	0	0	0	0	0	0
Gdpd5	0	0	0	0	0	0	0.05	0	0	0	0	0	0	0.01	0	0	0	0.36	0.83	0.52	0	0	0	0.04
2900076A07Rik	0	0.02	0	0	0	0	0	0	0	0	0	0	0	0	0	0	0.29	0	0	0	0	0	0	0
Abca7	0.33	0	0	0.07	0.54	0	0	0	0.1	0	0	0	0	0	0	0	0.15	0.36	0	0	0.3	0	0	0
Rgs8	0	0.31	0.25	0.04	0	0	0.49	0	0	0	0	0	0	0	0	0	0	0	0	0.19	0	0	0.2	0
Gpr176	0.01	0	0	0	0	0	0.01	0.17	0	0	0	0	0.51	0	0	0	0	0	0	0	0	0	0	0
Pde4d	0	0.23	0	0.13	0	0	0.49	0.23	0.19	0.24	0.25	0	0.05	0.21	0	0.23	0.24	0.21	0	0	0	0	0	0
Efnb2	0.12	0	0.46	0.31	0.5	0	0	0	0	0.13	0.37	0	0	0	0	0	0	0	0	0	0	0	0	0
Btbd9	0	0	0	0	0	0	0	0	0	0	0	0	0	0	0	0	0.14	0.04	0.1	0.01	0	0	0.04	0
Cpne6	0	0	0.12	0.11	0	0	0	0	0	0	0	0	0	0	0	0	0.06	0	0	0	0	0	0.11	0
D430036J16Rik	0	0	0	0	0	0	0.11	0.54	0	0.66	0.16	0	0	0	0	0	0	0	0	0.19	0	0	0	0
Amz1	0	0	0.38	0.24	0.03	0	0	0	0	0	0	0	0	0	0	0	0	0.26	0.18	0.07	0.27	0	0.36	0
As3mt	0.76	0.19	0	0	0	0	0	0	0	0.39	0	0.16	0	0	0	0	0.42	0	0	0	0	0	0	0
Rhpn1	0	0	0.06	0	0	0	0	0	0	0.93	0.08	0.6	0	0	0	0	0	0	0	0	0	0	0	0
Nrep	0	0	0	0	0	0	0	0	0.05	0.47	0	0	0	0	0	0	0.14	0.11	0	0	0	0	0	0
Ampd3	0.25	0	0	0	0	0	0.28	0	0.38	0	0.01	0	0	0	0	0	0.09	0	0	0	0	0	0	0
Adgra1	0	0	0	0	0	0	0	0	0	0	0	0.03	0	0	0	0	0	0	0.3	0.28	0	0.21	0	0
Sim1	0	0	0	0.01	0.04	0	0.18	0.08	0	0	0.17	0	0	0	0	0	0.99	0	0	0	0	0	0	0
Drc1	0	0	0.03	0	0	0	0	0	0	0	0	0	0	0	0	0	0	0	0.28	0.09	0	0	0	0.14
Plch1	0	0	0.34	0.35	0	0	0	0	0	0	0	0	0	0	0	0.16	0.86	0.27	0	0	0	0	0.44	0
Herc3	0.36	0	0	0	0.02	0	0	0	0	0	0	0	0	0	0	0	0.16	0	0	0	0	0	0	0
E130114P18Rik	0	0	0	0	0	0	1	0	0	0	0	0	0	0	0	0	0.49	0	0	0.16	0	0	0	0
Mat2a	0.08	0	0	0	0	0	0	0	0	0	0	0.09	0	0	0	0	0	0	0	0	0	0	0	0.05
Nkx2-1	0.46	0	0.52	0.47	0.61	0.73	0	0	0	0	0	0	0	0	0.52	0	0.01	0	0	0	0.5	0	0	0
Cpa6	0.69	0.47	0	0.24	0	0.82	0	0	0	0	0	0	0	0	0	0	0.1	0	0	0	0	0	0	0
Fam102b	0.02	0	0	0	0	0	0.57	0	0	0	0	0	0.05	0.22	0.49	0	0.01	0	0	0	0	0	0	0
1700027H10Rik	0	0.29	0	0	0	0	0.13	0	0	0	0	0	0.07	0	0	0	0.03	0.7	0	0	0	0	0.08	0
Bbx	0.38	0.41	0	0	0.02	0	0	0	0	0.01	0	0.01	0.12	0	0	0	0.06	0	0	0	0	0	0	0
Chat	0	0	0	0	0.03	0	0	0.32	0	0	0	0.54	0	0	0	0	0.85	0.96	0	0	0	0	0	0.3
Khdrbs3	0.07	0.34	0	0	0.46	0	0	0	0	0	0	0.13	0.19	0	0	0	0	0.14	0	0	0.18	0	0	0
Kcnh3	0	0	0.52	0.05	0	0	0	0	0	0.91	0	0	0	0	0	0	0.14	0	0	0	0.89	0	0	0
Rere	0	0	0	0	0.04	0	0.07	0	0	0	0	0.05	0	0	0	0	0.22	0.12	0.12	0	0	0.19	0.12	0.11
9330179D12Rik	0.36	0	0.36	0	0.04	0.18	0.33	0.17	0	0	0	0	0	0.69	0.77	0	0.19	0	0	0	0	0.12	0	0
Tmem196	0	0	0.06	0	0	0	0	0.63	0.74	0.05	0.64	0	0	0	0	0	0.34	0	0.04	0	0	0	0.61	0
Slc25a23	0	0	0	0	0	0	0	0	0	0	0	0.03	0	0	0	0	0.1	0	0.04	0	0	0	0.08	0.02
Mtss1	0.11	0.18	0	0	0.15	0.08	0	0	0	0.1	0.12	0	0	0	0	0	0.13	0.17	0	0	0	0	0	0
Nectin3	0	0	0	0	0	0	0	0	0	0	0	0	0	0	0	0	0	0.08	0.41	0.41	0.57	0.37	0.66	0.35
Angpt1	0	0	0	0.06	0.69	0	0.82	0	0.83	0	0	0	0.82	0	0	0	0.45	0.22	0	0	0	0	0	0
Stxbp2	0.05	0	0	0	0.05	0	0	0	0	0.23	0.22	0.72	0	0	0	0	0	0	0.25	0.05	0.2	0	0.1	0.36
Tshz3	0	0.19	0	0	0	0.29	0.81	0	0	0	0	0	0	0	0	0	0.03	0	0	0	0	0	0	0
Slc22a4	0	0	0	0.13	0	0	0.23	0	0.15	0	0.14	0	0	0	0	0	0.04	0	0.17	0	0	0	0.09	0
Gfod2	0	0.13	0	0	0	0	0	0	0	0	0	0	0.11	0	0	0	0.17	0	0	0	0	0	0	0
Grm3	0	0.51	0	0	0	0	0	0	0	0.26	0.07	0.04	0	0	0	0	0.56	0.08	0	0	0	0	0	0.17
Smpd1	0	0	0	0	0	0	0	0	0.55	0	0	0	0	0.02	0	0	0.23	0	0	0	0	0	0	0
Irak3	0	0	0	0	0	0	0	0.72	0	0.93	0.66	0	0	0.06	0	0	0	0	0	0	0	0	0	0
Kirrel3	0	0.26	0	0.26	0.32	0.52	0.56	0.19	0.14	0	0	0	0	0.7	0.67	0	0.28	0	0	0	0.53	0	0	0
Pfkp	0.03	0	0	0	0	0.12	0	0	0	0.06	0.04	0.03	0	0	0	0	0.01	0	0	0	0	0	0	0.06
Abcc5	0	0	0	0.12	0.16	0	0	0	0	0	0	0	0.02	0	0	0	0.03	0	0	0	0	0	0	0
Frmd4b	0	0	0.07	0.11	0	0	0	0	0	0	0	0	0	0	0.02	0.14	0	0.67	0	0	0	0.02	0.03	0
Ttn	0.02	0.26	0	0.78	0.66	0	0	0	0	0	0	0	0	0	0	0	0.15	0	0	0	0	0	0	0
Pitpnm2	0	0	0	0	0	0	0	0	0.02	0.31	0	0	0	0	0	0	0.01	0.15	0	0	0	0	0.02	0
Prkg2	0	0.28	0.87	0	0.08	0	0	0	0	0	0	0	0	0	0.91	0	0.01	0	0	0	0.26	0	0	0
Zdhhc20	0	0.05	0	0.03	0	0	0	0	0	0.05	0	0	0	0	0	0	0.18	0.06	0	0	0	0	0	0
Nhs	0	0	0	0.1	0.27	0.18	0	0	0	0.29	0.18	0.18	0	0	0	0	0.04	0.19	0	0	0	0	0	0
Cit	0	0	0	0.07	0.1	0.01	0	0	0.08	0.03	0.14	0	0	0.13	0	0	0.12	0	0	0	0	0	0	0
Deup1	0	0	0	0	0	0	0	0	0	0	0	0	0	0	0.19	0	0.06	0.49	0	0.02	0	0	0.18	0.45
Otol1	0	0	0	0	0	0.71	0	0	0	0	0	0	0	0	0	0	0	0	0	0	0	0	0	0
4933424G06Rik	0	0.1	0.18	0	0	0	0	0	0	0	0	0	0	0	0	0	0.06	0	0.09	0	0	0	0.27	0.11
Rnasel	0	0.52	0	0.12	0.37	0.5	0.43	0.05	0	0	0.49	0	0	0	0	0.05	0.19	0.13	0	0	0	0	0	0
Il1rapl1	0.23	0.23	0	0	0	0	0.22	0	0.13	0	0	0.21	0.1	0	0.16	0	0.02	0.23	0.23	0.22	0.09	0.19	0.24	0.19
Bcor	0	0	0	0	0.18	0	0	0	0.2	0.15	0	0.02	0	0	0	0	0.13	0	0	0	0	0	0	0
Palld	0	0.75	0	0.06	0	0	0	0.58	0.02	0	0	0	0	0	0	0	0.65	0	0	0	0	0	0	0
Pde1c	0	0	0.7	0.82	0.93	0.57	0	0	0	0	0	0	0	0	0.71	0	0.38	0.01	0	0	0	0	0	0
Cacng4	0.03	0.41	0.18	0.27	0	0.23	0	0	0	0	0	0	0	0	0	0	0.12	0	0	0	0	0	0	0
Aff2	0	0	0	0.14	0.73	0.04	0.28	0	0	0	0	0	0	0	0	0.02	0.06	0	0.16	0.22	0	0	0	0
Cdc42se2	0.01	0	0	0	0.24	0	0	0	0	0	0	0	0	0	0	0	0.1	0	0	0	0	0	0	0
Sh3d19	0	0	0	0.09	0.34	0.01	0	0	0	0.07	0	0	0	0	0	0	0	0	0	0	0.05	0	0	0
March3	0	0	0	0	0	0	0.53	0	0.72	0	0	0.46	0	0	0	0	0.28	0.16	0	0	0	0	0	0
Gpr149	0	0	0	0	0	0.09	0	0	0	0	0	0	0	0	0.06	0	0	0.05	0.32	0.7	0.62	0.26	0.7	0.02
Cfap36	0.22	0	0	0	0	0	0	0	0	0	0.03	0	0	0	0	0	0.07	0	0	0	0	0	0	0
Gfra2	0	0	0.66	0	0	0	0	0	0	0	0	0	0	0	0	0	0.09	0	0.58	0.06	0.3	0	0.04	0
Gpc5	0	0.12	0.3	0.39	0.52	0.79	0	0	0	0.59	0	0.48	0	0	0	0	0.25	0	0	0	0.22	0	0	0
Gpr39	0.06	0.84	0	0.21	0	0	0	0	0	0	0	0	0	0	0.19	0	0.15	0	0.28	0.06	0	0.33	0.29	0
Sfi1	0	0	0	0	0.04	0	0	0	0	0	0	0	0	0	0	0	0.32	0	0	0	0	0	0	0
Cacnb4	0	0	0	0	0	0	0	0.04	0	0.09	0.19	0.15	0	0	0	0	0.15	0.15	0.13	0	0	0	0	0.2
Sgpp2	0	0.43	0	0	0	0	0	0	0	0	0	0.14	0	0	0	0	0	0	0	0	0	0.62	0	0.12
Rwdd3	0	0	0	0	0	0	0	0	0	0	0	0	0	0	0	0	0.18	0	0.14	0.62	0	0	0.15	0.07
Gdf6	0	0	0.97	0.79	0.56	0	0	0	0	0	0	0	0	0	0.52	0	0.3	0	0	0	0	0	0	0
Tusc3	0.1	0.17	0	0	0	0	0	0	0	0	0.11	0	0.18	0	0	0	0.02	0	0	0	0	0	0	0
Opcml	0	0	0	0	0	0	0.09	0.18	0.14	0.12	0	0.21	0	0	0	0.11	0.23	0.25	0.42	0.3	0.24	0.25	0.31	0.35
Fcho2	0	0	0	0	0	0	0	0	0	0	0	0	0	0	0	0	0.19	0	0.05	0.12	0.11	0.12	0	0
Mir670hg	0	0	0.21	0.68	0	0.36	0	0	0	0	0.36	0	0	0.09	0	0.12	0.07	0	0	0	0	0	0	0
Nsun7	0	0	0	0	0	0	0	0	0	0	0	0	0	0	0	0	0.03	0	0	0	0	0.06	0	0
Pbxip1	0	0	0	0	0	0	0	0	0	0	0	0	0	0	0	0	0.52	0	0.25	0.78	0	0	0.23	0.01
Cirbp	0	0	0	0	0	0	0.04	0.03	0.04	0	0	0	0	0	0	0	0.28	0	0	0	0	0	0	0
Cfap44	0	0	0	0	0	0	0	0	0	0.18	0	0	0	0	0	0	0	0	0.52	0.63	0	0	0.35	0.04
Ubap1l	0.38	0.49	0.09	0	0	0	0	0	0	0	0	0	0	0	0	0	0.29	0.15	0	0	0	0	0	0
Pth2r	0.93	0	0.93	0.6	0.1	0	0	0	0	0	0.41	0	0	0	0.43	0	0.18	0	0	0	0	0	0	0
Syt5	0	0	0	0	0	0	0	0	0	0	0	0	0	0	0	0	0.05	0	0	0.11	0	0	0	0
Them4	0	0.12	0.49	0	0	0	0	0	0	0	0	0	0.02	0	0	0	0.12	0	0	0	0	0	0	0
Npy2r	0	0	0.82	0.78	0	0.87	0	0	0	0	0.79	0	0	0	0	0	0.2	0	0	0	0	0	0	0
Sgcd	0.15	0.05	0	0.19	0.2	0.07	0.68	0.25	0.44	0	0	0.22	0.19	0.2	0	0	0	0.05	0	0	0	0	0	0
Prrc2c	0.07	0.15	0	0	0.02	0	0	0	0	0.07	0	0.04	0	0	0	0	0.02	0	0	0	0	0	0	0
Hs3st5	0	0	0	0	0.03	0.27	0	0	0	0.78	0.28	0.43	0	0	0.18	0	0.06	0.37	0	0	0.22	0	0	0.4
Ncald	0.5	0.18	0.17	0.13	0.42	0.18	0	0	0	0	0	0	0.19	0	0.17	0	0.05	0	0	0	0.1	0	0	0
Rcbtb1	0	0	0	0	0.22	0	0	0	0.16	0	0	0	0	0	0	0	0.05	0	0	0	0	0.03	0	0
Abca5	0	0	0	0	0	0	0	0	0.07	0	0	0	0	0	0	0	0.1	0.16	0	0	0	0	0	0
Mgat4d	0	0	0	0.87	0.86	0.44	0	0	0	0	0	0	0.32	0	0	0	0.11	0	0	0	0	0	0	0.43
Zbtb20	0	0	0	0	0	0	0.28	0.2	0.2	0.26	0	0.23	0.25	0.55	0.33	0	0.23	0	0	0	0	0	0	0
Tes	0.13	0.66	0	0	0	0	0.08	0	0	0	0	0	0	0	0	0	0.16	0	0.57	0.26	0	0	0	0
Sept4	0	0	0	0	0	0	0	0	0	0	0	0	0	0	0	0.08	0.49	0	0	0.12	0	0	0	0
Prdm6	0	0	0	0.88	0.37	0	0.06	0	0.86	0	0	0	0	0	0	0	0	0.67	0	0	0	0	0	0.65
Itpka	0	0	0.51	0	0	0	0	0	0	0.59	0	0.68	0	0	0	0.34	0.02	0	0	0.05	0.31	0	0	0
Arid1b	0	0	0	0	0.16	0	0.04	0	0	0.07	0.15	0.06	0	0	0	0	0	0	0	0	0	0	0	0
Nwd2	0.85	0.74	0	0	0	0	0	0	0	0	0	0	0	0	0.09	0.9	0.3	0.68	0	0	0	0	0	0
Ska2	0	0	0	0	0	0	0.36	0	0	0.46	0.01	0.08	0	0	0	0	0	0	0	0	0	0	0	0
Loxl2	0	0.03	0	0	0	0	0	0.79	0	0.85	0	0.14	0	0	0	0.25	0.4	0	0	0	0	0.12	0	0
Elmod1	0	0	0.02	0	0	0.13	0.25	0	0	0	0.14	0	0	0.18	0	0.14	0.15	0.07	0	0	0	0	0	0.01
Pcsk2	0	0	0.19	0	0.23	0.03	0.04	0.21	0.21	0	0	0.06	0	0.22	0	0	0	0	0	0	0.28	0.08	0	0
Far2	0	0	0	0	0.04	0	0	0	0	0	0.18	0	0	0.2	0	0	0	0	0	0	0	0	0	0
Fjx1	0	0	0	0	0	0	0.09	0.72	0.61	0	0	0	0	0.62	0.23	0	0.08	0	0	0	0	0.01	0	0.17
Smarca2	0	0	0	0	0.19	0	0	0	0.29	0	0	0	0.16	0	0	0.15	0.06	0	0	0	0	0	0	0.07
Ocrl	0	0	0	0	0	0	0	0	0	0.16	0.06	0.18	0	0	0	0	0	0	0.07	0	0	0.15	0	0
Tgfbr1	0	0	0	0	0	0	0	0	0	0	0	0	0	0	0.04	0	0.13	0	0	0.03	0.76	0	0	0.67
Scn9a	0.18	0.01	0	0	0	0	0	0	0	0.32	0.22	0	0	0	0	0	0.22	0.1	0.28	0.11	0	0	0	0.08
Pmch	0	0	0	0	0	0	0.1	0	0	0	0	0	0	0	0	0	0	0	0.02	0.15	0	0.09	0	0.15
Map4	0	0	0	0	0	0	0	0	0	0.01	0	0	0	0	0.01	0	0.15	0	0	0	0	0	0	0.18
B230334C09Rik	0	0	0	0	0.02	0	0	0	0	0	0.08	0	0	0.54	0	0	0	0	0	0	0	0	0	0
Strbp	0.06	0.12	0.14	0	0.03	0	0.17	0.2	0.09	0.05	0	0.02	0	0.14	0	0	0.2	0.13	0.03	0	0.17	0.11	0.22	0.22
Grb10	0.02	0	0.04	0	0	0	0	0	0	0	0	0	0	0	0	0	0	0	0.1	0.08	0.16	0.06	0.05	0.02
Ank1	0.21	0.23	0	0	0	0.12	0.15	0	0	0	0.08	0	0	0	0	0	0.09	0.19	0	0	0	0	0	0
Morn1	0	0	0	0	0	0	0	0	0	0	0	0	0	0	0	0	0.03	0	0.06	0.06	0	0	0	0
Ppia	0	0	0	0	0	0	0.14	0	0	0	0	0	0	0.03	0	0.03	0	0	0	0	0	0	0	0.06
Plekha1	0.13	0	0	0	0	0	0	0	0	0	0	0	0	0	0	0	0.26	0	0.05	0	0	0	0	0
Morn2	0	0	0.13	0.03	0	0.01	0	0	0	0	0	0	0	0	0	0	0.2	0	0	0	0	0	0	0
Pcdh19	0	0	0	0	0	0	0.63	0	0.36	0	0	0	0	0.35	0	0	0.17	0.07	0	0	0	0.16	0	0
Pdcd7	0.32	0.43	0	0	0	0.13	0	0.13	0	0	0	0	0	0	0	0.1	0.21	0.2	0	0	0	0	0	0
Prex2	0	0.89	0.11	0	0.01	0	0.07	0	0	0	0.43	0	0	0	0.38	0	0.62	0	0	0	0	0	0	0
C230034O21Rik	0	0.2	0.5	0.07	0.41	0	0.26	0.85	0	0	0	0	0	0.31	0.46	0	0	0	0	0	0.06	0	0	0
Csmd2	0	0.18	0	0	0.14	0	0.07	0	0	0	0	0	0	0.14	0.14	0	0	0	0	0.08	0.04	0.14	0	0
Pde4b	0.19	0.2	0.17	0	0.03	0.19	0.25	0	0	0	0	0	0	0.05	0.29	0	0.19	0.02	0	0	0.1	0	0	0
Avp	0	0	0	0	0	0	0.06	0	0	0	0	0	0	0	0	0	0	0	0	0	0	0.02	0	0.19
Cdc14a	0.11	0	0.05	0	0	0	0	0	0	0.74	0.9	0	0	0	0	0	0.65	0	0	0	0	0	0	0
Muc3a	0	0.11	0	0	0	0	0	0	0	0.78	0	0.21	0	0	0.23	0	0	0.06	0	0	0.5	0.16	0	0
Kl	0	0.08	0	0	0.65	0	0	0.1	0	0.96	0.65	0	0	0.6	0	0.09	0	0	0	0	0	0	0	0
9530003J23Rik	0	0	0	0	0	0	0	0	0	0	0	0.71	0	0	0	0.97	0	0	0	0	0	0	0	0
Rabgap1l	0	0	0.19	0	0.12	0	0	0	0	0.07	0	0	0	0	0	0	0.15	0	0.05	0	0	0	0.05	0
Egfr	0	0	0.08	0.97	0	0.06	0	0	0	0.1	0	0	0.38	0	0	0	0.15	0	0	0	0	0	0	0
Nts	0	0	0.04	0	0.59	0	0	0	0.15	0	0	0	0	0	0.78	0	0.08	0	0	0	0	0	0	0
Flt3	0	0	0	0	0	0.39	0	0	0	0	0.17	0	0	0	0	0.02	0.09	0.08	0	0	0	0	0	0.17
Zbtb46	0	0.26	0.01	0	0	0	0	0	0	0	0	0	0	0	0	0	0.1	0	0.1	0	0	0	0	0
Klhl13	0	0	0.32	0.17	0.2	0	0	0	0	0	0	0	0	0	0	0	0.3	0	0	0	0.56	0	0	0
Wscd2	0	0	0.1	0	0	0	0	0	0	0	0	0.02	0	0	0	0	0.11	0.06	0	0	0.17	0	0	0
Myo1h	0.68	0.11	0.47	0	0.74	0.05	0	0	0	0	0	0	0	0	0	0	0.35	0	0.55	0	0.05	0	0.18	0
Tmem158	0	0	0	0	0.04	0	0	0	0	0	0	0	0.04	0.23	0.02	0	0	0	0	0.01	0	0.19	0	0
Kif5a	0.08	0.18	0	0	0.08	0.15	0	0	0	0	0	0	0	0	0	0	0.08	0	0	0	0	0	0	0
Pld5	0	0	0	0	0	0	0	0	0	0	0	0.04	0.26	0.88	0.37	0.78	0.21	0.39	0	0	0	0.78	0	0.24
Gria3	0	0	0.22	0.01	0	0.22	0.16	0.19	0	0	0	0	0.12	0.26	0.4	0	0	0	0	0	0.43	0.22	0	0
2010300F17Rik	0.81	0.54	0	0.14	0	0	0	0	0	0	0	0.19	0.17	0	0.17	0	0.33	0	0	0	0	0	0	0
Gpr139	0	0	0	0.26	0	0	0	0	0.28	0	0	0	0	0	0	0	0.1	0	0	0	0	0.25	0.79	0.56
Ccdc88c	0	0	0	0	0	0	0.56	0	0.81	0.17	0.02	0	0	0	0	0	0.5	0.44	0	0	0	0	0	0
Gramd1b	0.08	0	0	0.17	0.12	0.2	0	0	0	0	0.01	0	0	0	0	0.06	0	0	0	0	0	0	0	0
Cacna1e	0	0	0	0	0	0	0.13	0	0	0	0	0.2	0	0	0	0	0	0	0.21	0.19	0.04	0.21	0.17	0
Mbnl1	0	0	0	0	0	0	0	0	0	0.06	0.14	0	0	0.09	0	0	0	0	0	0	0.06	0	0	0
Grm4	0	0	0.2	0	0	0	0.75	0	0	0	0	0	0	0	0.02	0	0	0.24	0	0.04	0.18	0	0	0
Itgb3bp	0	0	0	0	0	0	0	0	0	0	0	0	0	0	0	0	0.27	0	0	0	0	0	0	0
Etl4	0.9	0.78	0.36	0.47	0.38	0	0	0	0.04	0	0	0	0	0	0	0.32	0.43	0	0	0	0	0	0	0
Clstn1	0	0.1	0	0	0	0	0.14	0.11	0.09	0	0	0	0	0.17	0	0	0.06	0.04	0	0	0	0.01	0	0
Grik1	0	0.78	0.6	0.47	0.34	0	0	0.92	0	0.2	0	0.36	0	0	0	0.03	0.47	0.66	0	0	0	0	0	0
Manba	0.11	0.07	0	0	0	0	0	0	0	0	0	0	0	0	0	0	0.08	0	0	0	0	0	0	0
Col4a5	0.05	0	0	0	0	0.03	0	0	0	0.27	0	0	0	0	0	0.89	0.56	0.24	0	0	0	0	0	0
Rpl4	0	0	0	0	0	0	0	0.02	0	0	0	0	0	0.07	0	0	0	0	0	0	0	0	0	0.04
Pwwp2a	0	0.06	0	0	0	0	0	0	0	0	0	0	0	0	0	0	0	0	0.08	0	0	0	0	0
4933432K03Rik	0	0	0	0.62	0	0	0	0.41	0	0	0.02	0	0	0	0	0	0	0.15	0	0	0	0.86	0.72	0
Srrm4os	0	0.04	0.04	0.36	0.65	0	0	0	0	0	0	0	0	0	0	0	0	0	0	0	0	0	0	0
Slamf8	0	0.13	0.16	0	0	0	0	0	0	0.92	0.72	0.57	0.34	0	0	0.01	0.19	0	0	0	0	0	0	0
Sned1	0	0	0	0	0	0	0	0	0	0	0	0	0	0	0	0	0.09	0	0.52	0.82	0	0	0.32	0.68
Sept9	0	0	0	0	0	0.25	0.79	0.56	0	0	0	0	0	0	0	0	0.16	0	0	0	0	0.38	0	0
Sycp2	0.15	0	0.01	0.03	0.2	0	0	0	0	0	0	0	0.1	0	0	0	0.34	0	0	0	0	0	0	0
Nexmif	0	0.11	0.31	0.17	0	0	0	0	0.19	0	0	0	0	0	0	0	0.15	0	0	0	0	0	0.11	0
A930009A15Rik	0	0	0	0	0	0	0.91	0	0.23	0	0	0	0	0	0	0	0.1	0	0.55	0.31	0	0	0	0
9630028H03Rik	0	0	0	0	0	0	0	0	0	0.74	0	0.68	0	0.08	0	0	0.13	0	0	0.01	0.64	0	0	0.18
Uqcc1	0	0.01	0	0	0	0	0.02	0	0.15	0	0	0	0.05	0	0	0	0.37	0	0	0	0	0	0	0
Vwc2l	0.9	0.29	0.56	0.89	0.29	0.48	0	0	0	0.1	0	0	0.46	0	0	0	0.53	0	0	0	0	0	0	0
Grin3a	0.51	0.74	0.46	0.09	0.29	0.24	0	0	0.28	0	0	0	0	0	0	0.11	0.29	0	0	0	0	0	0	0
Lactb2	0	0	0	0	0	0	0	0	0	0.12	0	0.41	0	0	0	0	0.12	0	0.08	0	0	0	0	0.15
Olfm1	0	0.05	0	0	0	0	0	0	0.22	0	0	0	0	0.02	0	0	0.25	0	0	0	0	0	0	0
Hectd2	0	0	0	0	0.45	0	0.36	0	0	0.32	0	0.16	0	0	0	0	0.1	0	0	0	0	0	0	0
Zfp462	0.41	0.07	0	0	0	0.02	0	0	0	0.16	0	0.29	0.15	0	0.18	0	0	0.11	0	0	0	0	0	0
Slco3a1	0.07	0	0	0.06	0.08	0.15	0	0	0	0	0	0	0	0.18	0	0	0	0	0.02	0	0.17	0	0	0
Car10	0	0	0.02	0.06	0	0.17	0.22	0.2	0.2	0	0	0.12	0	0.2	0.15	0.2	0	0.24	0.09	0.17	0	0.22	0.14	0.18
Gda	0	0	0	0	0	0	0	0	0	0.47	0	0.74	0	0	0.15	0	0	0	0	0	0.32	0.16	0.31	0
4933428C19Rik	0	0	0	0.26	0.9	0	0	0.34	0	0.16	0	0.04	0	0	0	0.32	0.33	0	0	0	0	0	0.23	0.26
Trpv6	0	0.23	0.24	0	0	0	0	0.96	0	0	0	0	0.06	0	0	0	0.07	0	0	0	0.05	0	0	0
Chd7	0	0	0	0	0	0	0.92	0	0	0	0	0	0.14	0	0	0	0.66	0.06	0	0.14	0	0	0.2	0.77
Cfap74	0	0	0.23	0	0	0	0	0	0	0.02	0	0	0	0	0	0	0.05	0	0	0	0	0	0.05	0.21
Prss30	0	0	0	0	0	0	0	0	0	0.7	0	0.69	0	0	0	0	0.05	0	0.2	0.35	0	0.26	0.48	0.76
Pou6f2	0	0.1	0	0	0.93	0	0	0.78	0.77	0.42	0	0.32	0	0	0	0	0.7	0	0	0	0	0	0	0
Dgki	0.08	0.17	0	0.11	0	0.06	0	0	0	0	0	0	0	0	0	0	0.17	0.22	0.02	0	0.1	0	0.12	0
4933408N05Rik	0	0	0.39	0.11	0	0	0	0.19	0	0.55	0	0.36	0	0	0	0	0	0	0	0	0	0	0.07	0.03
Serinc5	0	0	0.34	0.33	0.3	0	0	0	0	0	0	0	0	0	0	0	0.11	0	0	0	0	0	0	0
Trps1	0	0.15	0	0	0	0.08	0	0	0	0.49	0.12	0.43	0	0	0	0	0.42	0	0	0	0	0	0	0
Srpx2	0.18	0.3	0.5	0	0	0	0.85	0	0.59	0	0	0	0	0	0	0	0	0	0	0	0	0.63	0	0
Crhr1	0.13	0.65	0.14	0.42	0.39	0.58	0	0	0	0.06	0	0	0	0	0	0.23	0.71	0	0	0	0	0	0	0
Satb2	0	0	0.93	0	0	0	0	0	0	0	0	0	0	0	0.14	0	0	0	0	0.94	0	0.92	0.91	0
Fign	0	0.75	0.56	0.72	0	0	0	0.2	0	0	0	0	0	0	0	0	0	0	0	0.36	0	0	0.95	0
Cfap65	0	0	0.16	0.17	0	0	0	0	0	0	0	0	0	0	0	0	0.1	0	0.52	0.81	0	0.46	0.28	0.42
Ddah1	0	0	0	0	0	0	0	0	0	0.02	0.12	0	0.15	0	0	0	0	0.1	0	0	0	0	0	0
Ism2	0.19	0.05	0	0	0	0	0	0	0.5	0	0.92	0	0	0.15	0	0	0	0	0	0	0	0	0	0.19
Reln	0	0	0	0	0.54	0	0.98	0	0.01	0	0	0	0	0	0	0.88	0.62	0	0	0	0	0	0	0
Mrap2	0	0.28	0	0	0	0	0	0.08	0	0	0.2	0	0.12	0.22	0	0	0.04	0.31	0	0	0	0.12	0	0
Cdh12	0.9	0.65	0	0	0.14	0.56	0	0	0	0.34	0	0.81	0	0	0	0	0.19	0	0	0	0	0	0	0
Fbxo27	0	0	0	0	0	0	0	0	0	0	0	0.35	0	0.27	0	0	0.05	0.39	0	0	0.31	0.32	0	0.34
Syndig1	0.83	0.53	0.87	0.77	0	0	0	0	0	0	0	0	0	0	0	0	0.53	0	0.07	0	0	0	0	0
Wdfy3	0.1	0.15	0	0.06	0.06	0	0	0	0	0	0	0	0.05	0	0	0	0	0	0	0	0	0	0	0
Ifi202b	0	0	0	0	0.5	0	0	0.28	0	0	0	0	0	0.97	0	0.72	0	0	0	0	0	0	0	0
Trp53bp1	0	0.08	0	0	0.04	0.02	0	0	0	0	0	0	0	0	0	0	0	0	0	0	0	0	0	0
Xkr6	0.13	0.13	0	0	0	0	0	0	0	0	0.01	0.07	0	0	0	0	0.09	0	0	0	0	0.01	0	0
Phkb	0	0	0	0.31	0	0	0	0	0	0	0	0	0	0	0	0	0.25	0.14	0	0	0	0	0	0
Epb41l4a	0.59	0	0	0.58	0.29	0.8	0	0	0.1	0	0.37	0	0	0	0	0.01	0.22	0	0.04	0	0.16	0	0	0
Cyb5r4	0	0	0	0	0	0	0	0	0	0.02	0	0.05	0.3	0	0	0	0.48	0	0	0	0	0	0	0
Zfp804b	0	0	0	0.48	0.07	0	0.83	0.13	0.74	0.76	0.13	0.28	0	0	0	0	0.29	0	0	0.16	0	0	0	0
Hsd17b14	0	0	0.78	0.96	0.75	0	0	0	0	0	0	0	0	0	0	0	0	0	0	0	0	0	0	0
Pi16	0	0	0	0	0	0	0	0	0	0	0	0	0.37	0	0.23	0	0.52	0	0.32	0.63	0	0.39	0	0.46
Cfap206	0	0	0.14	0.35	0	0	0	0	0	0.53	0	0	0	0	0	0	0.17	0	0.65	0	0	0	0.48	0.11
Lamb1	0	0	0	0.4	0.08	0	0	0.04	0	0.83	0.87	0.35	0	0	0	0	0.13	0	0	0	0	0	0	0
Cep112	0	0	0	0	0.09	0	0	0	0	0	0	0.37	0	0	0	0.09	0.32	0.19	0.08	0	0.06	0	0.02	0.14
P2ry14	0	0	0	0	0	0	0	0	0	0	0	0	0	0.17	0	0.09	0.18	0.15	0.15	0	0.15	0	0	0.16
Stard9	0	0	0	0	0	0	0	0.29	0	0	0	0.39	0	0	0	0	0	0	0	0	0.66	0.18	0.18	0.15
Rgs17	0	0	0	0	0	0	0	0	0	0.05	0.19	0	0	0	0	0	0.1	0.13	0	0	0	0	0	0
Mycbp2	0.04	0.19	0	0	0	0	0.12	0	0.03	0	0	0	0.12	0	0.03	0	0.04	0	0.02	0	0.07	0	0.07	0
Eva1b	0	0	0	0	0	0	0	0	0	0.87	0	0.69	0.02	0	0	0	0.11	0	0	0	0	0.57	0.44	0
Soga3	0.14	0.18	0	0	0	0	0	0	0	0	0	0	0	0	0	0	0.06	0	0	0	0	0	0	0
Lhpp	0	0	0	0	0.39	0	0.87	0.07	0.11	0	0	0	0	0	0	0	0.29	0	0	0	0	0	0	0
B230217J21Rik	0.39	0.36	0	0.01	0	0	0.05	0.04	0	0	0	0	0	0	0.04	0	0	0.41	0	0	0	0	0	0
Sv2b	0.7	0.6	0.58	0.23	0	0	0.72	0	0.57	0	0	0	0	0	0	0	0	0	0.43	0	0	0	0	0
Sema6a	0	0	0	0	0	0	0	0.02	0	0	0	0	0	0	0	0	0.27	0.28	0.47	0.18	0	0.26	0	0.13
Cpne5	0.04	0.38	0	0.55	0	0.04	0	0.14	0	0.86	0.79	0	0.03	0	0	0.23	0.28	0.35	0	0	0	0	0	0
Riiad1	0	0	0	0	0	0	0	0	0	0	0	0	0	0.1	0	0	0.46	0	0.53	0.45	0	0	0	0
Efcab1	0	0	0.3	0.15	0	0	0	0	0	0	0	0	0	0	0	0	0	0	0.21	0	0	0.03	0	0
Cfl2	0.03	0	0	0	0	0	0	0.2	0	0	0	0	0	0	0	0.03	0	0.06	0	0	0	0	0	0
Scn3a	0	0	0	0	0	0	0	0	0	0	0	0	0	0	0	0	0	0.2	0.17	0.12	0	0.02	0.2	0.14
Haghl	0	0	0	0	0	0.02	0	0	0	0	0	0	0	0	0	0.1	0.09	0.07	0	0	0	0	0	0.16
Smad3	0	0	0	0	0	0	0	0	0	0	0	0.06	0	0	0	0	0	0.12	0.32	0.7	0.61	0.74	0.41	0.7
Btbd11	0	0	0	0	0	0	0.19	0	0	0	0	0	0	0	0	0	0	0.17	0.16	0.08	0	0	0.17	0
Unc5b	0	0.93	0	0.21	0	0	0	0	0	0	0	0	0	0	0	0	0.38	0.47	0	0	0	0	0	0.07
St6galnac5	0	0.15	0.27	0.45	0.1	0.5	0	0	0	0	0.06	0	0	0	0	0	0.19	0.09	0	0	0	0	0.01	0.5
Plat	0	0	0.13	0	0.19	0	0	0	0	0	0	0	0	0	0	0	0.44	0	0	0	0.16	0	0.48	0
Mblac2	0.09	0	0	0	0	0	0	0	0	0	0	0.02	0	0	0	0	0.13	0.11	0	0	0	0	0	0.16
Sst	0	0.04	0.04	0.12	0	0	0.07	0	0	0	0	0	0	0.12	0	0	0	0	0	0	0	0	0	0
Btbd7	0	0	0	0	0	0	0	0	0	0	0	0.14	0.1	0	0.04	0	0	0	0	0	0	0	0	0
Cblb	0.09	0	0	0	0.09	0	0	0	0.13	0.06	0.12	0	0	0	0.04	0	0	0	0	0	0	0	0	0
Rspo3	0.56	0.49	0	0	0	0	0	0	0	0.92	0	0.15	0.13	0.91	0.43	0	0.06	0	0	0	0	0	0	0.3
Lynx1	0	0	0.1	0	0	0	0	0	0	0	0	0	0	0	0	0	0.13	0.11	0	0.06	0	0	0	0.17
Efnb3	0	0.17	0.05	0	0	0	0.02	0	0.12	0	0	0	0	0	0	0	0.13	0	0	0	0	0	0	0
Phf11c	0	0	0.11	0.73	0.98	0.05	0	0	0	0	0	0.23	0	0	0	0	0.17	0	0	0	0	0	0	0
Col2a1	0.45	0.99	0	0	0	0	0	0	0	0	0	0	0.24	0	0	0	0.18	0	0	0	0	0	0	0
Med14	0	0	0	0	0	0	0.12	0	0	0.04	0	0.28	0	0	0	0	0	0.07	0	0	0	0	0	0
Per2	0	0	0	0	0	0	0.61	0.06	0.57	0.14	0	0.04	0	0	0	0	0.18	0	0	0	0	0	0	0
Ptprm	0	0	0	0	0.47	0	0	0	0	0.28	0.22	0.45	0.44	0.09	0.33	0.22	0	0.06	0	0	0.17	0.19	0.06	0.14
Nell2	0.34	0.05	0.21	0	0.07	0	0	0	0	0	0.16	0	0.16	0	0	0	0	0.22	0	0	0	0	0	0.07
Cfap77	0	0	0	0	0	0	0	0	0	0.01	0.03	0	0	0	0.11	0	0	0	0.14	0	0	0	0	0
Tmsb4x	0	0	0	0	0	0	0.06	0	0.05	0	0	0.08	0	0.16	0.01	0.1	0	0	0	0	0	0.08	0	0
Scai	0.13	0.18	0.02	0	0.01	0	0.05	0	0	0	0	0	0	0	0	0	0.02	0	0	0	0	0	0	0
Vcan	0	0	0	0	0	0	0.36	0.34	0	0.96	0.82	0.06	0	0	0	0.85	0.03	0	0	0	0	0	0	0
Mbnl3	0	0	0.41	0	0	0	0	0	0	0.85	0.14	0	0	0	0.25	0	0.86	0	0	0	0.05	0	0	0.61
Syt16	0.08	0	0.09	0	0.22	0	0	0	0	0	0	0	0	0	0	0	0.08	0	0.05	0	0	0	0.04	0
Pik3c2a	0	0	0	0	0	0	0	0	0	0.02	0	0.09	0	0	0.15	0	0	0	0	0	0.03	0	0	0
Nin	0	0	0	0	0	0	0	0	0	0	0	0	0	0	0	0	0	0.07	0.06	0.17	0.07	0	0	0
Mapk4	0	0.05	0.16	0	0	0.03	0.91	0	0.17	0	0	0.48	0	0	0	0	0.08	0	0	0	0	0	0	0
Grik4	0	0.19	0	0	0.18	0.04	0	0	0	0	0	0	0	0	0.17	0	0	0.21	0	0	0.25	0.17	0	0
Sfmbt2	0	0.1	0.02	0.15	0.78	0	0	0	0	0.62	0.01	0.34	0	0	0	0	0.07	0	0	0	0	0	0	0
Fank1	0	0	0.02	0.22	0	0	0	0	0	0.01	0	0	0	0	0	0	0.07	0	0.2	0.21	0	0	0	0
Nrg1	0	0	0	0.2	0	0.17	0.05	0	0.1	0.28	0.35	0	0	0.17	0	0.23	0.21	0.15	0.07	0.16	0	0	0.23	0.24
Rorb	0.5	0	0	0	0.55	0	0	0	0	0	0	0	0	0	0.98	0.4	0.68	0.69	0	0	0	0	0	0.94
Dpf1	0.06	0	0	0	0.02	0.17	0	0	0	0	0	0	0	0	0	0	0	0	0	0	0	0	0	0.25
Dst	0.19	0.18	0	0	0	0.03	0.04	0	0	0	0	0	0.07	0	0.06	0	0.15	0.15	0	0	0	0	0	0
Bcl2l11	0.77	0	0	0.02	0	0	0.72	0	0.57	0	0	0	0	0	0	0.14	0.08	0	0	0.17	0	0	0	0
Dclk3	0	0.02	0.38	0.01	0	0	0	0	0	0.73	0.05	0.62	0	0	0	0	0.11	0	0	0	0.06	0	0	0
Bmp15	0	0	0	0	0	0	0	0	0	0	0	0	0	0	0	0.98	0	0	0	0	0	0	0	0
Napepld	0	0	0	0	0	0	0.68	0.07	0.01	0	0	0	0	0	0	0	0.07	0	0.73	0.26	0	0.51	0.32	0.82
Sqle	0	0.07	0	0	0	0	0	0	0	0	0	0	0	0	0	0	0.06	0	0	0	0.01	0	0	0.3
Agbl4	0.12	0	0.1	0.16	0	0.17	0	0.1	0.1	0.15	0.12	0	0.11	0.04	0.08	0	0.18	0	0	0	0	0	0.11	0
Ccdc171	0	0	0	0	0.22	0	0	0	0	0	0	0.22	0	0	0	0	0.12	0.72	0	0	0.55	0.09	0.03	0
Rbks	0.01	0	0	0	0	0	0	0	0	0.27	0.21	0.31	0	0	0	0.38	0.31	0	0	0	0	0	0	0
9530059O14Rik	0.41	0.2	0.04	0	0.12	0.31	0	0	0	0	0	0.1	0	0	0	0.14	0.26	0.14	0.02	0	0.55	0	0	0.39
Tiparp	0	0	0.19	0	0.5	0	0	0	0	0	0	0	0	0	0	0	0.61	0	0	0.05	0.2	0	0	0
Esyt2	0	0	0	0	0	0	0	0	0	0.29	0.04	0.08	0.09	0	0	0	0	0	0	0	0	0	0	0
Lca5	0	0	0	0	0.03	0.17	0	0	0	0	0	0	0	0	0	0	0.25	0	0	0	0.04	0	0.22	0
Thbs4	0.55	0.94	0	0	0	0.65	0	0.4	0	0	0	0	0.54	0	0	0	0.45	0	0	0	0	0	0.37	0
Ros1	0.61	0.01	0	0	0	0	0.52	0	0	0	0	0	0.39	0.94	0	0	0	0.92	0.88	0	0	0	0	0
Sft2d2	0	0	0	0	0	0	0	0	0	0	0	0.81	0.22	0	0.3	0.22	0.31	0	0	0.14	0	0	0	0.21
Kdm5c	0	0.1	0	0	0	0	0	0	0	0	0	0	0	0	0	0	0.25	0	0.01	0	0	0	0	0
Samd3	0	0	0	0	0	0	0	0	0	0	0.95	0	0.84	0	0.23	0	0.17	0	0	0	0.69	0	0	0.28
Rps6ka2	0	0	0	0	0	0	0	0	0	0	0	0	0	0	0	0	0	0	0.3	0.17	0.08	0.15	0.18	0.08
Pxmp4	0	0	0	0	0	0	0	0	0.02	0.34	0.33	0	0	0	0	0	0.56	0	0	0	0	0	0.05	0
Dera	0.73	0	0.46	0	0	0	0	0	0	0	0	0.88	0	0	0.5	0	0	0	0	0	0.04	0	0	0
Vmn2r38	0.56	0.82	0	0	0	0.18	0	0	0	0	0	0	0	0	0.83	0	0.08	0	0	0	0.7	0	0.44	0.43
Psmd9	0	0	0.07	0	0	0	0	0	0	0	0	0	0	0	0	0	0	0	0	0	0	0.05	0	0
Coro2a	0	0	0	0	0	0	0	0	0	0	0	0	0	0	0	0	0	0.28	0.32	0	0	0.46	0	0.03
Efcab6	0.11	0	0.14	0.25	0.33	0	0	0	0	0.6	0.36	0	0	0.24	0	0	0.03	0.12	0	0	0	0	0	0
Dscam	0.2	0.19	0.18	0.11	0.05	0.09	0	0	0	0	0	0	0.18	0	0.2	0	0.13	0.13	0	0	0.13	0.06	0.18	0
Adamts3	0	0	0.35	0	0	0	0	0	0	0.63	0.49	0.67	0.78	0	0	0	0.03	0	0	0	0	0	0	0
Slc6a15	0	0	0	0	0	0.02	0	0.28	0.05	0	0.08	0	0	0	0	0	0	0	0	0	0.03	0	0	0
Zeb1	0.1	0.03	0.19	0.17	0	0.05	0	0	0	0	0	0	0	0	0	0	0.13	0.2	0	0	0	0	0.03	0
Slitrk1	0.1	0	0	0	0.08	0	0	0	0	0.3	0	0.39	0.15	0	0.06	0	0	0	0	0	0	0	0	0
Pcca	0	0	0	0	0	0	0	0	0	0	0	0.19	0	0	0	0	0.19	0	0	0	0	0	0	0
Cdkn1c	0	0	0	0	0	0	0.45	0.39	0.97	0	0	0	0	0	0.2	0	0	0	0	0	0	0	0	0
Extl3	0	0	0	0	0	0	0	0	0	0	0	0	0	0	0	0	0.16	0	0.11	0	0	0	0	0
Cers4	0.17	0.2	0.04	0.03	0	0	0	0	0	0	0	0	0	0	0	0	0	0	0	0	0	0	0	0
Crim1	0	0	0	0	0.13	0	0	0	0	0	0	0.08	0	0.18	0	0	0	0	0.41	0.08	0	0.1	0	0
Dnah5	0	0.36	0.2	0.69	0.16	0.05	0.58	0	0.02	0	0	0	0	0	0	0	0.11	0	0	0	0	0	0	0
Asap2	0.56	0.14	0	0	0	0.08	0.12	0	0	0	0	0	0	0	0	0	0	0	0	0	0	0	0	0
1700010K23Rik	0.13	0	0	0.09	0	0.01	0	0	0.01	0.62	0.37	0.01	0.28	0	0.2	0	0.21	0	0	0	0	0	0	0
Exph5	0	0	0	0	0	0	0	0	0	0.98	0	0.43	0	0	0	0	0.58	0	0	0	0	0	0	0.46
Aig1	0	0	0	0	0	0	0.04	0.17	0.07	0.11	0.11	0.11	0.12	0	0	0	0.05	0	0	0	0	0	0	0
Mttp	0	0.02	0	0	0	0	0	0	0	0.08	0	0	0	0	0	0	0.09	0	0.05	0.01	0	0	0	0.14
Tmem219	0.4	0.25	0	0	0	0	0	0	0	0	0	0	0.19	0	0.59	0	0.12	0	0	0	0	0	0	0
Peli1	0	0	0	0	0	0	0	0	0	0	0	0	0	0	0	0	0	0	0.26	0.04	0	0	0	0.07
Nxph1	0.63	0.07	0	0	0.3	0.12	0.85	0.59	0.69	0	0	0.37	0	0	0.44	0	0	0	0	0	0.13	0	0	0
Rprm	0.61	0.11	0.53	0	0.56	0.76	0	0	0	0	0	0.26	0	0	0	0	0.1	0	0	0	0	0	0	0
Dcc	0.15	0	0	0.1	0.19	0	0.46	0.33	0.26	0	0	0	0	0.17	0	0	0.24	0	0.42	0.25	0	0	0.03	0
Gimap5	0	0	0	0	0	0	0	0	0	0	0	0	0	0	0	0.72	0	0	0	0	0	0	0	0
Utrn	0.04	0.06	0	0	0	0	0	0	0	0	0	0.05	0.8	0.8	0.95	0	0.15	0	0	0	0.33	0.34	0	0
Dsg2	0	0	0.77	0.49	0	0	0	0	0	0	0	0.44	0.06	0.37	0.85	0	0.03	0	0.22	0	0	0	0	0
Gabbr2	0	0	0	0	0	0	0	0	0	0	0	0	0	0	0.17	0	0	0.2	0.14	0.15	0.19	0.2	0	0
Rsrp1	0	0	0	0	0	0.01	0	0	0	0	0	0.07	0.04	0	0	0.13	0.2	0.08	0.09	0.11	0	0	0.08	0.23
Ptch2	0	0	0	0	0	0	0	0	0	0.71	0	0	0	0	0.42	0	0.03	0	0	0	0.94	0	0	0
Bpifb2	0	0	0.62	0	0	0	0.93	0	0.11	0	0	0	0	0.4	0	0	0.16	0	0	0.41	0	0	0	0
Lrrtm1	0.07	0.01	0	0	0	0	0	0	0	0.06	0	0	0	0	0	0	0	0.11	0.01	0	0	0	0	0
Bmp2k	0	0	0	0	0	0	0.7	0.11	0.03	0	0	0	0	0	0	0	0.17	0.1	0	0	0	0	0	0
4933431M02Rik	0	0	0	0.02	0	0	0	0	0	0	0	0	0	0.48	0	0	0	0	0.92	0.69	0	0.26	0.46	0
Bmp3	0	0	0.05	0.52	0	0.11	0	0.01	0.63	0.76	0.34	0.05	0	0	0	0.84	0.22	0	0	0.11	0	0	0	0
Hsp90b1	0	0.12	0	0	0	0	0.17	0	0.11	0	0	0	0	0.13	0	0	0.03	0	0	0	0	0	0	0
Ntrk2	0	0	0	0	0	0	0	0	0	0.17	0.17	0.17	0	0	0	0	0.21	0	0	0	0	0	0.07	0
Nrip3	0	0	0	0	0	0	0	0.59	0.13	0.07	0.2	0	0	0	0	0.17	0.11	0.12	0	0	0	0	0	0
Ddo	0	0.11	0	0	0	0	0.86	0	0	0	0	0	0.04	0	0	0	0.3	0	0.93	0.39	0	0	0.11	0.05
Stum	0	0	0	0.03	0	0	0	0	0	0.93	0.42	0.87	0	0.01	0	0	0.2	0	0	0.29	0	0.12	0	0
Slc25a30	0	0	0	0	0	0	0	0	0	0	0	0.12	0	0	0	0	0	0	0.63	0.22	0	0	0	0
Rnps1	0	0	0	0	0	0	0	0	0	0	0	0	0	0	0	0	0.07	0	0.11	0	0	0	0	0
9630041A04Rik	0	0.06	0.65	0.06	0.72	0.78	0	0	0	0	0	0	0	0	0	0	0	0	0	0	0	0.05	0	0
Npffr1	0.89	0.24	0	0	0	0	0	0	0	0	0	0	0.87	0.17	0.69	0	0	0	0	0	0.24	0	0	0
Nmrk1	0.24	0	0.09	0.2	0.89	0	0	0	0	0	0	0	0	0	0	0	0.2	0	0	0	0	0	0	0
Adgrb1	0	0	0	0	0	0	0.05	0	0	0	0	0	0	0.02	0	0	0	0	0	0.07	0	0.12	0	0
2900089D17Rik	0	0	0.16	0.29	0.83	0	0	0	0	0	0	0	0	0	0	0	0	0	0	0.25	0.13	0.29	0	0
Plppr2	0	0	0	0	0	0	0	0	0	0	0	0	0	0	0	0	0	0	0.02	0.06	0	0	0	0
Wdr76	0	0	0.08	0	0.05	0	0	0	0	0	0	0	0	0	0	0	0.53	0	0	0	0.58	0	0.02	0
Scn1a	0	0	0	0	0	0.01	0.09	0	0	0	0.12	0.06	0	0	0	0	0	0	0.06	0	0	0	0.06	0
Klf8	0	0.04	0	0.05	0.18	0	0	0	0	0.38	0	0.01	0	0	0	0	0.18	0.21	0	0	0	0	0	0
Acp7	0	0	0	0.01	0	0	0.01	0.04	0	0	0	0.36	0	0	0	0.44	0	0.99	0	0	0	0.9	0	0.09
Dnah12	0	0	0.12	0.08	0	0	0	0	0	0	0	0	0	0	0	0	0.03	0	0.84	0.6	0	0	0.86	0.95
Rragb	0.07	0	0	0	0.22	0	0	0	0	0	0.04	0	0	0	0	0	0	0.04	0	0	0	0	0	0
Ryr2	0	0.02	0.12	0.04	0	0.06	0	0	0	0.08	0	0.15	0	0	0	0	0	0.09	0	0	0.18	0.09	0.07	0
Syne1	0.21	0.16	0.12	0.11	0	0.13	0	0.16	0	0	0	0	0	0	0	0	0.13	0	0	0	0	0.06	0	0
Zar1	0.29	0.03	0	0	0	0	0	0	0	0	0	0	0	0	0.5	0	0.43	0	0.19	0	0	0.97	0.9	0
Ankrd6	0	0	0	0.05	0.09	0	0	0	0	0	0	0	0	0	0	0	0	0.04	0	0	0	0	0	0.1
Scg5	0	0.13	0.02	0	0	0	0.21	0.01	0	0	0	0	0	0.15	0.1	0.15	0.13	0.04	0	0	0	0	0	0.17
Rasgrf2	0	0	0	0	0	0	0	0	0	0.19	0.02	0.61	0.21	0	0	0	0	0.22	0.19	0.18	0	0.21	0.18	0.04
Impdh1	0	0	0	0	0	0	0	0	0	0	0	0	0.57	0	0	0.13	0.03	0	0	0	0	0	0	0
Fndc1	0	0	0	0	0	0	0	0	0	0	0	0	0	0	0	0	0	0.25	0.59	0.58	0	0.28	0.63	0.06
Galnt3	0	0	0.07	0	0	0	0	0	0	0	0	0	0	0	0.68	0	0.1	0	0.4	0.28	0.56	0.3	0	0.04
Cep83	0	0	0	0.03	0	0	0	0	0	0.29	0	0	0	0	0	0	0	0	0	0	0	0	0	0
Prkd1	0	0	0	0	0	0	0	0	0	0.54	0.68	0	0	0	0	0	0	0.6	0.78	0.44	0	0	0.67	0.91
4930527B05Rik	0	0.08	0	0	0	0.01	0.09	0	0	0.47	0	0.41	0	0	0	0	0	0	0	0	0	0	0.01	0
Gbgt1	0	0.1	0.78	0	0	0	0	0	0.28	0	0	0	0	0	0.15	0	0	0	0.79	0.48	0	0	0.71	0
Scaper	0	0	0	0	0	0	0	0	0	0	0	0	0	0	0	0	0.19	0	0.12	0.16	0	0.11	0	0.13
Bend7	0	0	0	0	0	0	0	0	0	0	0	0	0	0	0	0	0	0	0.04	0.27	0.03	0.43	0	0
6430584L05Rik	0.03	0.26	0.15	0.36	0.68	0.4	0	0	0	0.71	0.04	0.46	0	0	0.2	0.24	0.12	0	0	0	0	0	0	0
4930567K20Rik	0	0	0	0	0	0	0	0	0	0	0	0.31	0	0	0	0	0.12	0.25	0.4	0.3	0	0	0	0
Tm2d3	0	0.02	0	0	0	0	0.16	0.06	0	0	0	0	0	0	0	0	0	0.08	0	0	0	0	0	0
Nfix	0	0	0	0	0	0	0.97	0.15	0.96	0	0	0	0	0	0	0	0.26	0	0	0	0	0	0	0
D130043K22Rik	0	0	0	0	0	0	0	0	0	0.09	0	0	0	0	0	0	0.05	0	0	0	0	0	0	0
Nrcam	0	0	0	0	0	0	0	0	0	0	0	0.07	0	0	0.02	0	0.12	0	0.06	0.17	0	0.2	0.18	0
Ahi1	0.19	0.21	0.15	0.16	0.21	0.1	0.21	0	0	0.09	0	0.13	0.14	0.15	0.16	0.11	0	0	0.17	0.08	0.17	0	0.19	0
Akt3	0.13	0.17	0.06	0	0	0	0	0	0	0	0	0	0	0	0.03	0.04	0.13	0.1	0	0	0	0	0	0
Osbpl6	0.21	0.07	0.18	0	0	0	0	0	0	0	0	0.18	0	0	0.09	0	0.09	0.07	0	0	0.16	0	0	0
2410018L13Rik	0	0.86	0	0	0	0	0.16	0.34	0.45	0.1	0	0	0.3	0	0.04	0	0.5	0.24	0	0	0	0	0	0
Lsamp	0.23	0.2	0.25	0.25	0.24	0.25	0.12	0	0	0	0	0	0	0	0	0	0.24	0.23	0.24	0.24	0.25	0	0.2	0.17
Il1rapl2	0	0.92	0.36	0.76	0.41	0	0	0	0	0	0	0	0	0	0.33	0	0.66	0	0	0	0	0	0	0.16
Mycbp	0	0.09	0	0	0	0	0	0	0	0	0	0.01	0	0	0	0	0.01	0	0	0	0	0	0	0
Ctnnbl1	0	0	0	0.13	0.04	0	0	0	0	0	0	0	0	0	0	0	0.35	0	0	0	0	0	0	0
Lekr1	0	0	0	0.3	0	0	0	0	0	0	0.11	0	0	0	0	0	0	0	0	0	0	0	0	0
Hccs	0.64	0	0	0	0	0	0	0	0	0	0	0	0	0	0	0	0.13	0.14	0.79	0.72	0.36	0.05	0	0.33
Mid1	0.02	0	0	0	0	0	0.65	0	0.04	0	0	0	0	0	0	0	0	0.69	0	0.31	0	0	0	0
Far1os	0	0	0	0	0.3	0	0	0	0	0.09	0.04	0	0	0	0	0	0	0	0	0	0	0	0	0
Frrs1	0.04	0	0.25	0	0.62	0.17	0	0	0	0	0	0.51	0	0	0	0	0	0	0	0	0.74	0	0	0
Tshr	0	0	0	0	0	0	0	0.58	0.92	0.12	0.26	0	0	0.68	0	0	0	0	0	0	0	0	0	0
1700094M23Rik	0	0.79	0.14	0.79	0.3	0	0	0	0	0	0	0	0	0	0	0	0	0	0	0	0.2	0	0	0
Ccdc34	0.1	0.29	0.1	0	0	0	0	0	0	0	0.02	0	0	0	0.12	0	0.08	0	0	0	0	0	0	0
1700084F23Rik	0	0	0	0.85	0	0	0	0	0	0	0	0	0	0.43	0	0	0	0.23	0	0	0.07	0.55	0	0
Fgf13	0.04	0	0	0	0.11	0	0	0	0	0.62	0.43	0	0	0.75	0.17	0	0.34	0	0	0	0.11	0	0	0
Ankfn1	0	0	0.01	0	0	0.29	0	0	0	0	0	0.56	0	0	0	0.18	0.17	0.56	0	0	0.84	0.69	0	0
Nexn	0	0	0	0	0	0	0	0	0	0.91	0.22	0.42	0	0	0	0	0.02	0	0	0	0	0.24	0	0
Nr6a1	0	0	0	0	0	0	0	0.05	0.02	0	0	0.01	0.04	0	0	0	0.08	0.2	0.04	0.1	0	0	0	0.14
Usp20	0.02	0	0	0	0.02	0.12	0	0	0	0	0	0	0	0	0	0	0.01	0	0	0.03	0	0	0	0
Trim9	0	0	0.02	0	0	0.14	0	0	0	0	0	0	0	0	0	0	0.05	0	0	0	0.07	0	0	0
Frmd4a	0.16	0.12	0	0.02	0	0	0.14	0	0	0.04	0	0.12	0	0	0	0	0.17	0.2	0.14	0	0.18	0	0.17	0.12
Dnah7a	0	0	0.59	0	0	0	0	0	0	0	0	0	0	0.03	0	0	0	0	0	0	0.21	0	0	0
Tcaf1	0	0	0.04	0.17	0	0	0	0.04	0	0	0	0.09	0	0	0	0	0.18	0	0	0	0	0	0	0
Uvrag	0.09	0	0.03	0.03	0.11	0	0	0	0	0	0	0	0	0	0	0	0	0	0	0	0	0	0	0
Rgsl1	0	0	0.36	0	0.19	0	0	0.63	0	0	0	0	0	0	0	0	0	0	0	0	0.79	0	0.59	0
Kcnmb4	0	0	0.35	0	0	0	0.12	0.03	0	0	0	0	0.12	0.09	0	0	0	0	0	0	0	0	0	0
Arhgef15	0.34	0.43	0	0	0	0	0	0	0	0	0	0	0	0	0	0	0.33	0.28	0	0	0	0	0	0
Tmem132cos	0.16	0	0.78	0	0.88	0	0.67	0	0	0	0	0	0	0	0	0	0.02	0	0	0	0	0.54	0	0
Sv2c	0	0	0	0.37	0.57	0	0	0	0	0	0	0.61	0	0	0	0	0.62	0	0.38	0	0.41	0	0	0
Chodl	0	0.17	0	0	0	0	0	0	0	0	0	0	0.94	0.49	0.12	0.19	0.45	0.04	0	0	0	0	0	0
Ntsr1	0	0	0	0	0	0	0.69	0	0.84	0	0	0	0	0.54	0	0.8	0.17	0.44	0.28	0	0	0	0	0
Hs3st4	0.09	0	0.31	0.08	0	0	0	0	0	0	0	0	0	0	0.32	0	0	0.21	0.36	0.24	0.47	0.28	0.4	0.2
Cux1	0	0	0	0	0	0	0	0	0	0.08	0	0.15	0.03	0	0	0	0	0	0.07	0	0	0	0	0
Abr	0	0.05	0	0	0	0	0	0	0	0.08	0	0.01	0	0	0	0	0.12	0	0	0	0.05	0	0	0.01
D830024N08Rik	0	0	0	0	0.1	0	0	0	0.01	0	0	0	0	0	0	0	0	0.03	0	0	0	0	0	0
Tmem266	0.01	0.11	0	0	0.11	0	0	0	0	0	0	0	0	0	0	0	0	0	0.45	0	0	0.19	0.18	0
Spink13	0	0	0	0	0	0	0	0	0	0.64	0	0.42	0	0	0.21	0.28	0	0.16	0	0	0.41	0	0	0.23
Syn3	0.19	0	0.11	0	0.04	0	0	0	0	0.09	0	0	0	0	0	0	0.04	0.1	0	0	0.06	0	0	0
Rapgef3	0	0	0.06	0	0.12	0.36	0.1	0	0	0	0	0	0	0	0	0	0.05	0.21	0	0.12	0	0	0	0
Rprml	0.11	0	0.71	0	0	0	0	0	0	0.24	0	0.03	0	0	0.36	0	0	0	0	0	0.83	0	0	0
Egflam	0.94	0.81	0	0	0	0	0	0	0	0	0	0	0.78	0	0.94	0	0	0	0	0	0	0	0	0
Apool	0.61	0.05	0	0	0	0.03	0	0	0	0	0	0.17	0.03	0	0.32	0.23	0.51	0	0	0	0	0	0	0
Cadm1	0.1	0.11	0.22	0.2	0.23	0	0	0	0.14	0	0	0	0	0.22	0.14	0	0.24	0	0.09	0.17	0	0.19	0.17	0
Lrrc3b	0	0	0	0	0	0	0	0	0	0	0	0.2	0	0	0	0	0.3	0	0.13	0.04	0	0.11	0	0.15
Man1a2	0	0	0	0	0	0	0	0	0	0	0	0.12	0	0	0	0	0	0	0.2	0.09	0	0.12	0	0
Rasgef1a	0	0.03	0	0	0	0	0	0	0	0.13	0	0.07	0	0	0	0	0	0	0	0	0	0	0	0
Rgs16	0	0	0.63	0.02	0	0	0	0	0.15	0	0	0.75	0	0	0	0	0.23	0	0	0	0	0	0.42	0.06
Smco4	0	0	0	0	0	0	0.07	0.08	0	0	0	0	0	0.07	0	0	0	0.33	0.14	0	0.04	0.45	0.01	0
Gria1	0.11	0	0.18	0.13	0.23	0	0	0	0.1	0.17	0	0.17	0	0	0.07	0	0	0	0	0	0.22	0.16	0.16	0
Lpcat2	0	0	0	0	0	0	0	0	0	0.18	0	0.43	0	0	0	0	0.12	0	0	0	0	0	0.2	0
Pdia5	0	0	0	0	0	0	0	0	0	0.77	0	0.42	0	0	0	0	0.07	0.02	0	0	0.35	0	0	0.32
Usp6nl	0	0	0	0	0	0	0	0	0	0	0	0	0.7	0	0.2	0	0.02	0	0.13	0	0	0.33	0.19	0
Tmem63c	0	0	0	0	0	0	0	0	0	0	0	0	0	0	0	0	0.02	0.05	0	0	0	0.05	0	0.03
Atp6v0c	0.16	0.26	0	0	0.43	0	0	0	0	0	0	0	0	0	0	0	0	0	0	0	0	0	0.19	0
Tmem191c	0	0.01	0	0	0	0	0	0	0	0.11	0	0.07	0	0	0	0	0	0	0.17	0.14	0	0.14	0.15	0.11
Grik5	0.06	0	0	0	0.02	0.03	0	0	0	0	0	0	0	0	0.06	0	0.16	0	0	0	0	0.01	0	0
Rspry1	0.1	0	0	0	0.17	0	0	0	0	0	0	0	0	0	0	0	0.24	0	0	0	0	0	0	0
Fam13c	0	0	0	0	0	0	0	0	0	0.11	0.14	0.11	0	0	0	0	0	0	0	0	0	0.01	0	0
Rab38	0.05	0	0	0	0	0	0	0.72	0	0	0	0.37	0	0.07	0.3	0	0	0.26	0	0	0.88	0	0.37	0.76
Nr5a1os	0	0	0	0	0	0	0.12	0.16	0	0.08	0	0	0	0	0	0	0	0.37	0.28	0.13	0	0	0.31	0.91
Samhd1	0	0	0	0	0	0.04	0	0	0	0	0	0	0	0	0	0	0.09	0	0.31	0	0	0.07	0	0
Pdlim7	0	0	0	0	0	0	0	0	0	0	0	0	0	0	0	0	0	0	0.08	0.19	0.05	0	0	0.11
Nbea	0.2	0.19	0.17	0.16	0.02	0	0	0	0	0	0	0	0.18	0	0.13	0	0.14	0.17	0	0	0.05	0	0	0
Znrf3	0	0	0.07	0	0	0	0	0	0	0	0	0	0	0	0	0	0.1	0	0	0	0	0	0	0
Ppp1r1a	0	0	0	0	0.01	0	0	0	0	0	0	0.46	0	0	0	0	0.43	0	0	0	0	0	0.12	0
Antxr2	0	0	0	0.02	0.91	0	0.08	0.08	0	0	0	0	0	0	0	0	0.77	0	0	0	0	0	0	0
Myo1b	0	0	0	0	0	0.4	0	0	0	0	0	0.01	0.37	0.12	0.78	0.08	0.05	0	0	0	0.83	0.45	0	0.65
Ndst4	0	0	0.9	0.94	0.11	0.4	0	0	0	0	0	0	0.52	0	0.14	0	0.56	0	0	0	0	0	0	0
Ptms	0.06	0	0	0	0	0	0	0	0	0	0	0	0	0	0.09	0	0	0	0	0	0.06	0.03	0	0
Pam	0.21	0	0	0	0	0	0.14	0	0	0	0	0	0	0.21	0.18	0.13	0	0	0.29	0.24	0	0.23	0.2	0
Gucy2f	0	0.4	0	0.3	0.85	0.03	0	0.41	0	0	0	0	0	0.28	0	0.03	0.18	0.31	0	0	0.21	0	0	0
Gprin3	0	0	0	0.19	0.44	0.01	0	0	0	0.04	0.03	0	0	0	0	0	0.16	0	0	0	0	0	0	0
Ano6	0.11	0	0	0	0.22	0	0	0	0	0.09	0	0	0.15	0	0	0	0	0.07	0	0	0	0	0	0
Samd9l	0	0	0.24	0	0.95	0	0	0	0	0	0.22	0	0.03	0	0	0	0.44	0	0	0	0	0	0	0
Mroh7	0.59	0	0	0.05	0	0	0	0	0	0.02	0	0	0	0	0	0	0	0.17	0	0	0	0	0	0
Eif4ebp1	0	0	0	0.89	0	0.29	0	0	0	0.43	0.08	0	0	0	0	0.15	0.07	0	0.53	0.81	0	0	0	0
Tmem26	0.22	0	0	0	0	0	0	0.77	0	0	0	0	0.79	0.72	0.3	0	0.33	0	0	0	0	0	0	0
Slc9a7	0	0.12	0.02	0	0	0	0	0	0	0	0	0	0	0	0	0	0.31	0	0	0	0	0	0	0
Rgs20	0.03	0	0	0	0	0	0	0.32	0	0	0	0	0	0	0	0.33	0.26	0	0	0.22	0	0	0	0
Mpped2	0.3	0	0	0	0	0	0	0.33	0.16	0.87	0.54	0.84	0.5	0	0	0	0.24	0	0	0	0	0	0	0
Stx16	0.18	0.2	0	0	0.06	0	0	0	0	0	0	0	0.11	0	0	0	0.07	0.11	0	0	0	0	0	0
Asap3	0	0.48	0	0	0	0	0.44	0.25	0	0	0	0	0	0	0	0	0.16	0.09	0	0	0	0	0	0
Cntn1	0.17	0	0	0	0	0.11	0	0	0	0	0	0	0	0	0.03	0	0.12	0.2	0	0	0.08	0	0.1	0
Prdm12	0	0	0	0	0	0	0	0	0.69	0.9	0.96	0.13	0	0	0	0	0	0	0	0	0	0	0	0
4930587E11Rik	0.06	0	0.04	0	0.01	0	0	0	0	0.04	0	0.03	0	0	0.56	0	0	0	0	0	0	0	0	0
Kctd1	0	0	0	0.21	0	0	0	0	0	0	0	0.26	0	0	0	0	0.05	0	0	0.26	0	0	0.81	0
Fgf1	0	0	0	0.2	0	0	0.47	0	0	0	0	0	0.14	0	0	0.11	0.6	0	0	0	0	0	0	0
Scn8a	0.05	0	0	0	0	0	0	0	0	0	0	0	0	0	0	0	0	0.15	0	0	0.17	0	0	0
Ankrd13a	0	0	0	0	0	0	0	0.07	0	0	0	0	0	0	0	0	0.01	0	0	0	0	0.28	0	0
Shank2	0	0	0	0.07	0.14	0	0	0	0	0.01	0.07	0	0	0	0	0	0.05	0.07	0	0	0	0	0	0
Wipf1	0	0	0	0	0.36	0	0	0	0	0.21	0	0	0	0	0	0	0.06	0	0.71	0.4	0.65	0.19	0.39	0
Ldhd	0.64	0.22	0	0	0	0	0	0	0	0	0	0	0	0	0	0	0.17	0.52	0	0	0	0	0	0.01
Gpld1	0.18	0.21	0	0	0.28	0	0.02	0	0	0	0	0	0	0	0	0	0.56	0	0	0	0	0	0	0
1700025G04Rik	0	0	0	0	0	0	0.23	0	0.24	0	0.11	0.1	0.15	0	0	0	0	0.2	0	0	0	0	0	0
Adamtsl1	0	0	0	0	0.89	0.06	0.93	0	0	0	0.09	0	0	0	0	0	0.11	0	0	0.38	0	0	0	0
Map3k5	0	0	0	0	0	0	0	0	0	0	0	0	0.15	0	0.18	0	0	0	0	0	0.28	0.02	0.15	0.11
Mapk8	0	0	0	0.09	0.01	0	0	0	0	0	0	0	0	0	0	0	0.21	0	0	0	0	0	0	0
Tapt1	0	0.07	0.14	0	0	0	0	0	0	0.2	0	0	0	0	0.01	0	0	0	0	0	0.02	0	0	0
Chsy3	0	0	0	0	0.44	0	0	0	0	0.02	0	0	0.15	0	0.82	0.55	0.37	0.08	0	0	0.17	0	0	0.15
Zc3h12c	0.03	0	0	0	0	0	0	0	0	0	0	0.01	0.05	0	0.18	0	0	0	0	0	0	0	0	0
Grin2b	0	0.04	0.22	0.17	0.19	0.2	0	0	0	0.08	0.07	0.14	0	0	0.14	0	0.18	0.01	0.2	0.15	0.15	0.16	0.19	0
Nfe2l2	0	0	0.45	0	0	0	0	0	0	0	0	0	0.35	0	0	0.18	0.32	0.24	0	0	0.3	0	0	0
Chga	0	0	0	0	0	0	0	0	0.02	0	0	0	0.17	0.09	0	0	0	0	0.39	0.09	0	0.01	0	0.11
Cda	0.06	0.1	0.33	0	0	0.36	0	0	0	0	0	0	0.12	0	0	0	0.02	0	0	0	0.03	0	0	0
Apobec4	0	0	0.11	0	0	0	0	0	0	0.05	0	0.29	0	0	0	0	0.25	0	0	0	0	0	0.05	0.23
Pde1b	0	0.19	0.34	0	0	0.35	0	0	0	0	0	0	0	0	0	0	0.21	0.37	0	0	0	0	0	0
Hnrnph3	0.07	0.16	0	0	0	0	0	0.1	0.05	0	0.01	0	0	0	0	0	0.15	0	0	0.04	0	0	0	0
St8sia4	0	0	0	0	0	0.03	0	0.08	0	0.28	0	0	0	0	0	0	0.28	0.15	0.17	0	0	0	0	0
Ptch1	0	0	0	0	0	0	0	0	0	0.47	0	0.01	0	0	0	0.04	0.08	0.03	0	0	0	0	0	0
Csmd3	0	0	0.21	0.01	0.19	0.19	0.13	0	0.11	0.02	0.17	0	0	0	0	0	0.21	0.15	0.22	0.23	0.23	0	0.22	0
Shisa4	0	0	0	0	0	0	0	0	0	0	0	0	0	0	0	0	0	0	0.19	0.1	0	0.04	0	0
Twf2	0	0	0	0	0	0.23	0	0	0	0	0	0.05	0	0	0	0	0.11	0	0	0	0	0	0	0
Fyco1	0	0	0	0	0	0	0	0	0	0	0	0	0	0	0	0	0.13	0	0.05	0.21	0.31	0.03	0	0
Ppp1r14c	0	0	0	0.06	0	0.02	0.12	0.67	0.03	0.34	0.08	0	0	0	0	0.24	0.08	0	0	0	0	0	0	0
Abca8b	0	0.36	0	0	0	0	0.01	0	0.19	0.45	0.56	0	0	0	0	0	0.03	0	0	0	0	0	0	0
P3h2	0	0	0	0	0	0	0.12	0	0	0	0	0	0	0	0.36	0	0.06	0.14	0.75	0.39	0	0	0.17	0.72
Crym	0	0	0	0	0	0	0	0	0	0.94	0	0	0	0	0	0	0	0	0.07	0	0	0	0.17	0.4
Atp2c2	0.93	0	0.28	0.06	0.89	0	0	0	0.21	0	0	0	0	0	0	0	0	0	0	0	0.13	0	0	0
Gng7	0	0	0	0	0	0	0	0	0	0.4	0	0	0	0	0	0	0.08	0	0	0	0	0	0.11	0
Pou2f2	0.45	0.64	0.05	0	0.03	0	0.48	0	0	0	0	0	0.04	0	0	0	0.2	0	0	0	0	0	0	0
Loxl1	0.64	0.77	0	0	0.12	0	0	0	0	0	0	0.26	0	0	0	0	0.12	0.89	0	0	0	0	0	0
Synm	0	0	0	0	0	0	0.68	0	0.46	0	0	0.24	0	0.27	0	0	0	0	0.54	0.01	0	0	0	0
Hs3st1	0	0	0	0.18	0.3	0	0	0	0	0	0.15	0.49	0	0	0	0	0.03	0	0	0	0	0	0.73	0.23
Brinp2	0.05	0	0.54	0	0	0.03	0	0	0	0.68	0	0.24	0.1	0	0	0	0.04	0	0	0	0.13	0	0	0
Prkag2	0	0	0	0.03	0	0	0	0	0	0	0	0	0	0	0	0	0	0.11	0	0	0.29	0	0	0
Acp1	0	0	0	0	0	0	0	0	0	0	0	0.08	0	0.11	0.13	0	0	0	0	0	0.14	0.15	0.13	0.07
Slc24a2	0	0	0	0	0	0	0	0.31	0	0	0	0.2	0.17	0.1	0.2	0	0	0	0	0	0.16	0.16	0.32	0
B3gat2	0.81	0.77	0	0	0.41	0	0	0	0	0	0	0	0	0	0	0.43	0.15	0	0	0	0	0	0	0
Dock3	0	0	0	0	0	0	0.04	0	0	0	0	0	0	0	0.08	0	0	0.04	0.17	0.07	0.15	0.18	0.16	0.12
Ablim2	0	0	0	0	0	0	0	0	0	0	0	0	0	0	0	0	0	0	0.08	0.15	0.24	0	0.05	0.23
Adm	0.27	0	0	0	0	0.77	0.91	0	0	0.55	0	0	0	0	0	0	0.04	0	0	0	0	0	0	0
Kcnb2	0	0	0	0	0	0	0.35	0	0	0	0	0.13	0	0.17	0	0.23	0	0.24	0.32	0.24	0.27	0.28	0.28	0.32
Gjb3	0.24	0.48	0	0	0	0	0	0	0	0	0	0	0	0	0.28	0	0	0	0.85	0.86	0	0	0	0
Pvt1	0	0	0	0	0	0	0	0	0	0	0	0	0	0	0	0.26	0.05	0.6	0.45	0.4	0.78	0.58	0.72	0.52
1700042O10Rik	0	0	0	0.12	0	0	0	0	0	0.73	0	0.88	0	0	0	0	0.62	0	0.35	0	0	0.32	0.04	0.12
Snai2	0	0	0.91	0	0	0	0	0	0	0	0.78	0	0	0	0	0	0.6	0	0	0.38	0.49	0	0	0
Wrn	0	0.09	0	0	0	0	0	0.33	0.02	0	0	0	0	0	0	0	0.05	0.1	0	0	0	0	0	0
Pinx1	0	0	0	0	0	0	0	0	0	0.51	0.56	0	0	0	0	0	0.06	0	0	0	0	0	0	0
Gpr155	0	0	0	0	0.18	0.23	0	0	0	0	0	0	0	0	0	0	0	0	0.11	0	0.17	0	0	0
Ap1s2	0.33	0	0	0.01	0	0	0	0	0	0	0	0	0	0	0	0	0.11	0	0	0	0	0	0	0
Olfr889	0	0	0	0	0	0	0.3	0	0	0	0	0.86	0.39	0	0	0	0.1	0	0.75	0.28	0	0	0	0.17
Npas2	0.34	0	0.48	0.7	0.53	0.36	0	0	0	0.29	0	0	0	0	0	0	0.08	0	0	0	0	0	0	0
Drd2	0.17	0	0	0	0.76	0	0	0	0	0	0	0.38	0.84	0	0	0.85	0.16	0	0	0	0	0	0.57	0
Esrrg	0	0	0	0	0	0.19	0	0	0	0.04	0	0.1	0	0	0	0.1	0	0.2	0	0	0	0	0	0
Fgf10	0	0	0	0	0	0	0	0.46	0	0.9	0.8	0.47	0.68	0	0.4	0	0	0	0	0	0.7	0	0	0.29
Cobl	0	0	0.19	0	0	0.18	0	0	0	0	0.07	0	0	0	0	0	0	0	0	0	0.11	0.11	0	0
Megf11	0	0	0	0	0	0	0.31	0	0	0	0	0	0	0	0	0	0	0.49	0.95	0.86	0.52	0.86	0.47	0.6
Rap1gds1	0	0	0	0	0.13	0	0	0.04	0	0.03	0	0.17	0	0	0	0	0	0.19	0	0	0.24	0	0	0.11
Clca3a1	0	0.46	0.43	0.93	0.35	0.52	0	0	0.07	0.62	0	0	0	0	0	0	0	0	0	0	0	0	0	0
Pou2f1	0	0	0	0	0	0	0	0.03	0.09	0.04	0.13	0	0	0	0	0	0.15	0	0	0	0	0	0	0
5033406O09Rik	0.13	0	0	0	0	0	0	0	0	0	0	0	0	0	0	0.93	0.86	0	0.11	0	0	0.65	0	0.2
Rasgrp1	0	0	0.75	0.15	0	0	0	0	0	0.09	0	0	0	0	0.86	0.03	0.4	0	0	0	0	0	0	0
Arl6ip1	0	0	0	0	0	0	0.13	0.12	0.15	0	0	0	0.07	0.11	0	0.12	0.18	0	0	0	0	0	0	0
Pcdh10	0	0.2	0	0	0	0	0.15	0	0	0	0	0.04	0.06	0	0	0	0	0.5	0	0	0	0	0	0.02
Eya4	0	0	0	0	0	0	0	0.99	0.1	0	0	0	0	0	0	0	0.42	0	0	0.12	0	0	0.14	0
Adrb3	0	0	0.53	0.57	0	0	0	0	0	0	0	0	0	0	0	0	0.32	0.6	0	0	0.33	0	0.62	0.4
A330102I10Rik	0	0.16	0	0	0.14	0.13	0	0.12	0	0	0	0	0	0	0	0	0	0.13	0	0	0.23	0	0	0
Efcab12	0	0	0.48	0.07	0.25	0.02	0	0	0	0	0	0	0	0	0.31	0	0.31	0	0	0	0	0	0	0
Stard13	0	0	0	0	0	0	0.46	0	0	0.5	0.27	0.27	0.24	0.51	0	0.64	0.16	0.32	0	0	0	0	0	0
Phyh	0.29	0.03	0	0	0	0	0	0.04	0.01	0	0	0	0	0	0	0	0.13	0	0	0	0	0	0	0
Fgd3	0.02	0	0.14	0.13	0.72	0	0	0.15	0.14	0	0	0	0	0.02	0	0	0.04	0	0	0	0.26	0.28	0	0
Tenm3	0	0	0	0	0	0.24	0.26	0	0.14	0	0	0	0	0.41	0.03	0.08	0.03	0	0.12	0.63	0	0.2	0	0
Lrch1	0.13	0	0.07	0	0	0	0	0	0	0	0	0	0	0	0	0.01	0	0.12	0	0	0.12	0	0	0
Lrfn2	0.13	0.08	0.15	0	0	0	0	0	0	0	0	0	0.16	0	0.39	0	0	0	0	0	0.22	0	0	0
Soat1	0	0	0	0	0	0	0	0.17	0	0.63	0.68	0	0	0	0	0.35	0.17	0	0.03	0	0	0	0	0.06
Sema4f	0	0	0	0	0	0	0	0	0	0.54	0	0.22	0	0	0	0	0.01	0	0	0	0	0	0	0
Mctp2	0	0	0	0.65	0	0.02	0	0	0	0	0.78	0	0	0	0	0	0	0	0	0	0	0	0.04	0
Gtf2f2	0	0.04	0.07	0.1	0.39	0	0	0	0	0	0	0	0	0	0	0	0	0	0	0.33	0	0	0	0
Ptbp3	0	0	0	0	0	0	0.08	0	0	0.17	0	0.31	0	0	0	0	0	0	0.41	0.05	0	0	0	0
Vgll4	0	0	0	0.34	0.05	0.2	0	0	0	0	0.01	0.01	0	0	0	0	0.1	0	0	0	0	0	0	0
St6gal2	0	0	0.62	0.8	0.08	0.48	0	0	0	0	0	0	0	0	0	0	0.55	0	0	0	0	0	0.04	0
Mlec	0	0	0	0	0	0	0	0	0	0	0	0	0	0	0	0.03	0.26	0	0.1	0.33	0	0	0	0.27
Ablim1	0.16	0	0	0	0.13	0	0	0	0	0	0.09	0	0	0.06	0	0	0	0.21	0	0	0.13	0	0	0
Cpne4	0	0	0	0.22	0.27	0.46	0	0.47	0.47	0	0.6	0.02	0	0	0	0	0.01	0	0	0	0	0	0.41	0
Lrtm1	0	0	0	0	0	0	0.06	0	0	0	0	0	0	0.02	0.13	0	0	0	0.33	0	0.07	0.44	0.72	0
Atp8b1	0	0	0.82	0.8	0.98	0.6	0	0	0	0	0	0	0	0	0	0	0	0	0	0	0	0	0	0
Ift122	0.01	0.1	0	0	0	0	0	0	0.03	0	0	0	0	0	0	0	0.31	0	0	0	0	0	0	0
Lmo4	0	0	0	0	0	0	0	0.29	0	0.09	0	0.02	0	0.89	0	0	0	0	0.08	0	0	0.55	0	0
Bend6	0.09	0.17	0	0	0	0.13	0.06	0	0	0	0	0	0.16	0	0	0	0.18	0.18	0	0	0	0	0	0
Slc7a3	0	0.44	0.26	0.14	0	0	0.71	0	0	0	0	0	0	0	0	0	0.2	0	0	0	0	0	0	0
Cd52	0	0	0	0	0	0	0	0	0	0	0	0.67	0	0	0	0	0	0	0.41	0.06	0	0	0.15	0.31
Rapgef4os1	0	0	0.08	0	0	0.04	0	0	0	0	0	0	0	0	0	0	0.11	0	0	0	0	0	0	0
Fam114a1	0.92	0.46	0.43	0	0	0	0	0	0	0	0	0	0	0	0.71	0	0.21	0.55	0	0	0.42	0	0	0
Fam49b	0.03	0	0	0	0	0	0	0	0	0	0.11	0.09	0	0	0	0.01	0.22	0.18	0	0	0	0	0	0.04
Spag16	0	0	0	0	0	0	0	0	0	0.13	0	0	0.9	0	0	0	0.76	0	0	0	0	0	0	0
Grip1os3	0	0	0.12	0	0.64	0	0	0	0	0	0	0	0	0	0	0	0.16	0	0.53	0	0.35	0	0.6	0
Emc9	0	0	0	0	0	0	0	0	0	0	0	0	0.08	0	0	0	0.41	0	0	0	0	0	0	0
Arsk	0	0	0	0	0	0	0	0	0	0.09	0	0.35	0	0	0	0	0	0	0.51	0	0.33	0.33	0	0
Flrt2	0.34	0.04	0.35	0.15	0.48	0.38	0	0	0	0	0	0	0	0	0.68	0	0	0	0	0	0.67	0	0	0
Ppp4r1	0	0	0	0	0	0	0	0	0	0	0	0	0	0	0	0	0.16	0	0	0	0	0.14	0	0.04
Chka	0	0	0	0	0	0	0	0	0	0.03	0	0.05	0	0	0	0	0	0	0.05	0.03	0	0	0.08	0
Pde11a	0.27	0.85	0	0	0	0	0	0	0	0.28	0	0	0	0	0	0	0.23	0	0	0	0	0	0	0.04
Ccdc81	0	0	0	0	0	0	0	0.51	0	0.43	0	0	0	0	0	0	0.13	0	0.24	0.65	0	0.05	0	0
Rab40b	0	0	0.04	0	0.01	0	0	0	0	0	0.11	0.18	0	0	0	0	0.1	0	0	0	0	0	0	0
3010003L21Rik	0	0	0	0	0	0	0.01	0	0	0.95	0.56	0.12	0	0	0	0	0	0	0	0.56	0	0	0	0
Slc37a1	0	0	0	0	0	0	0	0	0	0	0	0	0.12	0	0	0	0.08	0	0	0.09	0	0	0	0
St3gal4	0	0	0	0	0.38	0.21	0.17	0.06	0	0.16	0	0	0	0	0	0	0.38	0	0	0	0	0	0	0
Cdk5	0	0	0	0	0	0	0	0	0	0	0	0	0	0	0	0	0.17	0	0	0	0	0	0	0.1
Clmp	0	0.1	0.38	0.54	0.26	0.3	0	0	0	0.33	0	0	0	0.04	0.34	0	0	0	0	0	0	0	0	0
Glrb	0	0	0	0	0	0.08	0	0	0	0	0	0	0	0	0	0	0.22	0.01	0	0	0	0	0	0
Mbp	0	0	0	0	0	0	0	0	0	0	0	0.05	0	0	0	0	0.32	0	0	0	0	0	0	0
Sntg1	0	0	0	0	0	0	0.03	0.19	0.21	0.21	0.16	0	0	0.06	0	0	0.07	0.15	0.24	0.19	0	0.05	0.22	0.13
Arhgap32	0.15	0.04	0	0	0	0.04	0	0	0	0	0	0	0.11	0	0	0	0	0	0	0	0	0.14	0	0
Cdo1	0	0	0.13	0	0.59	0	0	0	0	0	0	0.49	0	0	0	0	0	0	0	0	0	0	0	0
Trmt10a	0	0	0	0	0	0	0	0	0	0	0	0	0	0	0	0	0.05	0	0.3	0.21	0	0	0.09	0.07
Frmpd3	0	0	0	0	0	0	0	0	0.12	0	0	0	0.37	0	0	0.12	0.21	0	0.24	0.12	0	0.02	0	0.15
Atp1a1	0	0	0.09	0	0	0	0	0	0	0	0	0	0	0.2	0.02	0	0	0	0	0.03	0	0.15	0	0
Ociad2	0	0	0	0	0	0	0.57	0	0	0	0	0	0	0.31	0	0.31	0.05	0	0	0.22	0	0	0	0
Zdbf2	0.18	0.23	0	0.07	0.03	0	0	0	0	0	0	0	0.19	0	0.24	0	0.07	0	0	0	0	0	0	0
Il16	0	0	0	0.35	0	0	0	0	0	0.76	0.83	0.49	0	0	0	0	0.14	0	0	0	0	0	0	0
Plekha5	0	0	0.11	0	0	0	0	0	0.16	0.03	0.22	0.19	0.09	0.03	0	0	0.11	0.04	0	0	0	0	0.11	0
Prkca	0	0	0.21	0.02	0	0	0	0	0	0.14	0	0.04	0	0.28	0.29	0	0.07	0.17	0	0	0	0.08	0	0
Nr3c2	0	0.27	0	0	0	0	0	0	0	0.34	0.45	0.17	0	0	0	0	0.04	0.09	0	0	0	0	0	0.12
Bves	0	0	0	0	0.86	0.79	0	0	0	0	0	0	0	0	0.56	0.58	0.13	0	0	0	0	0	0	0
Cacng5	0.03	0.37	0.16	0	0	0	0	0	0	0	0.22	0	0	0	0	0.22	0	0	0	0	0.21	0	0.72	0.37
Hs3st3b1	0	0	0.52	0	0	0	0	0	0	0	0	0	0	0	0.18	0	0	0	0.9	0.95	0.15	0.43	0.85	0.19
Dscaml1	0	0	0	0	0	0	0.94	0.74	0.73	0.41	0.36	0.59	0	0.52	0	0.15	0.56	0.67	0	0	0.05	0	0	0
Eepd1	0	0	0.14	0.21	0.26	0	0	0	0.56	0	0	0	0	0	0	0	0	0.75	0	0	0	0	0.52	0
Mctp1	0.4	0	0	0	0	0	0	0	0	0.51	0.15	0.41	0.38	0	0	0	0	0	0	0	0	0	0	0
Xrcc4	0	0	0	0	0	0	0	0	0	0.4	0	0	0	0	0	0	0.01	0	0.01	0	0	0	0	0
Kit	0	0	0	0.62	0	0	0.78	0	0.19	0.32	0.33	0.05	0	0	0	0	0.34	0.1	0	0	0	0	0	0
Dchs1	0.55	0.56	0	0	0.09	0	0.38	0	0.4	0.22	0	0	0	0	0	0	0.23	0.27	0	0	0	0	0	0
Pkd1l1	0	0.64	0.28	0	0	0	0	0	0	0	0	0	0	0	0	0	0	0.01	0.57	0.02	0	0	0.52	0.71
Akap9	0.1	0.14	0	0	0.02	0	0	0	0	0	0.16	0	0	0	0	0	0.13	0	0	0	0	0	0	0
Penk	0	0	0.51	0	0	0.14	0.04	0	0	0	0	0	0	0.84	0	0	0.07	0	0	0	0.25	0	0	0
Gad2	0	0	0	0	0	0	0.46	0.57	0.82	0.01	0.32	0.22	0	0	0	0	0.76	0	0	0	0	0	0	0
Tagap	0	0	0	0	0	0	0	0.07	0	0	0	0.15	0	0.03	0	0	0.08	0	0.22	0.86	0.01	0	0.54	0
Nlgn1	0	0	0.08	0	0	0	0.16	0	0	0.21	0.1	0.22	0	0.21	0.24	0	0	0.21	0.17	0	0.25	0.24	0.24	0
C1ql3	0	0	0.52	0	0	0	0	0.66	0.52	0	0	0	0	0	0.07	0.17	0.59	0	0	0	0	0	0	0
Necab2	0	0	0	0	0	0	0	0	0	0	0	0	0	0	0	0	0.08	0	0.85	0.46	0	0	0.25	0.08
Pcnt	0	0	0	0	0	0	0	0	0	0.46	0	0.83	0	0	0	0	0	0	0	0	0	0	0	0
Fam114a2	0	0	0	0	0	0	0	0	0.07	0.05	0	0.31	0	0	0	0	0	0	0	0	0	0	0	0
Pld3	0	0	0	0	0	0	0	0	0	0	0	0	0	0	0	0.03	0.1	0.05	0	0	0	0	0	0.11
A730085K08Rik	0	0	0.23	0	0	0.65	0	0	0.4	0.56	0.9	0	0	0	0	0	0.14	0	0	0	0.09	0	0	0
Tshz1	0	0	0	0	0	0.06	0	0	0	0	0.28	0.38	0	0	0.6	0	0	0	0	0	0	0	0	0
Ankrd29	0.45	0	0	0	0	0	0.35	0.06	0	0.65	0.27	0.08	0.12	0	0	0	0.34	0	0	0	0	0	0	0
Olfm2	0	0.1	0	0.1	0.3	0.1	0	0	0	0	0	0	0	0	0	0	0	0.13	0	0	0.05	0	0	0
Rxfp1	0	0	0	0	0.95	0.42	0	0	0	0	0	0	0	0	0	0	0.87	0	0	0	0.86	0	0	0
Acvr1	0	0	0	0	0	0	0	0	0.03	0	0	0	0	0.09	0	0	0.01	0	0	0	0	0.09	0	0
Tyk2	0	0	0.09	0	0	0	0	0	0	0	0	0.19	0	0	0	0	0.16	0.08	0	0	0.12	0	0	0
Fbxl7	0	0.31	0	0	0	0	0.64	0	0	0	0	0	0	0	0	0	0.26	0	0	0	0	0	0	0
Bmp2	0	0.71	0.83	0.46	0	0.28	0.43	0	0	0.25	0	0	0	0	0	0	0.04	0	0	0	0	0	0	0
Adamts18	0	0.13	0.79	0.4	0	0	0.1	0	0	0	0	0	0	0	0	0	0.04	0	0.31	0.41	0	0	0.12	0
Calcrl	0	0	0.94	0	0	0	0	0	0	0	0	0	0	0.11	0.73	0	0.27	0	0	0	0	0	0.15	0
Rnf152	0.73	0.77	0.74	0.34	0.01	0.22	0	0	0	0	0	0	0.31	0	0.45	0	0	0	0	0	0	0	0	0
Ppm1e	0	0	0	0	0	0	0	0	0	0.17	0.02	0.2	0	0	0	0	0.14	0	0.24	0.2	0.06	0.16	0.22	0.22
Slc22a17	0	0.16	0	0	0	0	0.14	0	0	0	0	0	0.09	0	0	0	0.19	0	0	0	0	0	0	0.07
Arhgap31	0	0	0	0	0	0	0	0.88	0.44	0.11	0.34	0	0	0	0	0	0.7	0	0.28	0	0	0	0.09	0
Slc1a2	0	0	0.33	0.02	0	0	0.12	0	0	0	0	0	0	0	0.03	0	0.29	0	0	0	0.1	0	0	0
Ptprz1	0.7	0.21	0	0	0	0.1	0	0	0	0.2	0	0.25	0.39	0	0.14	0	0.28	0	0	0	0	0	0	0
Cacna2d3	0	0	0	0	0	0	0.02	0	0	0	0	0	0.07	0.19	0.31	0	0.15	0	0.32	0	0.29	0.35	0.55	0
Rgma	0	0	0	0	0	0	0.82	0	0.03	0	0	0	0	0.58	0	0	0.12	0.84	0	0	0	0	0	0
A630012P03Rik	0	0	0.08	0	0.98	0	0	0	0	0	0	0	0	0	0	0	0.85	0	0.31	0.47	0	0.77	0.07	0
Drd3	1	0	0	0	0.41	0.86	0	0	0	0	0	0	0	0	0	0	0.09	0	0	0	0	0	0	0
Mob3b	0	0	0	0	0	0	0	0.96	0.96	0	0.45	0	0	0	0	0	0	0	0	0	0	0	0	0
Rab34	0.34	0.14	0	0	0.28	0	0	0	0	0.37	0.12	0.44	0	0	0	0.09	0.3	0	0	0	0	0	0	0
Usp11	0	0.07	0	0	0	0	0.03	0	0.05	0	0	0	0	0	0	0	0.08	0	0	0	0	0	0	0
Ripor2	0.16	0	0.36	0	0.26	0	0	0	0	0	0	0.27	0	0	0	0	0	0	0	0	0	0.41	0.52	0
Ppp1r21	0.36	0.07	0	0	0.47	0	0	0	0	0	0	0	0	0	0	0	0	0	0	0	0	0	0	0
Ranbp9	0.08	0	0	0	0.11	0	0	0	0	0.11	0	0.01	0	0	0.03	0	0	0	0	0	0	0	0	0
Lrrc4	0	0	0	0	0	0	0	0	0	0	0	0	0	0	0	0	0.13	0	0.04	0.11	0.02	0	0	0
Tll2	0	0	0	0.23	0.22	0.4	0	0	0	0	0	0	0	0	0	0	0	0	0.78	0.11	0.97	0	0.29	0.91
Ccdc60	0	0	0.62	0.95	0.93	0.46	0	0	0	0	0	0	0	0	0	0	0.21	0	0	0	0	0	0	0
Vwa3a	0.35	0	0.14	0.41	0.26	0	0	0	0	0	0	0.45	0	0	0.3	0	0.05	0	0	0	0.8	0	0.23	0
Fam78b	0.08	0	0	0	0	0	0	0	0	0	0	0	0.1	0	0	0	0.07	0	0	0	0	0	0	0
Rapgef5	0.02	0.02	0.15	0	0.15	0.11	0	0	0	0	0	0	0	0	0	0	0	0.14	0	0	0.2	0	0	0
Myo16	0	0.04	0	0	0	0.05	0.37	0.57	0.13	0.53	0.16	0.56	0	0	0	0	0	0.23	0	0	0	0	0	0.24
Spcs1	0	0	0	0.05	0	0	0.07	0.08	0	0	0	0	0	0.12	0	0	0	0	0	0	0	0	0	0
Alms1	0	0	0	0	0	0	0	0	0.01	0	0	0	0.14	0	0	0	0	0	0.13	0	0	0	0	0
Pbx4	0	0	0.19	0	0	0	0	0	0	0	0	0	0	0	0	0	0.02	0	0	0	0	0	0	0
Akap8l	0.02	0.15	0	0	0	0	0	0	0	0	0	0	0	0	0	0	0.2	0	0.02	0	0	0.09	0.07	0
Ankmy1	0.04	0	0	0.59	0.38	0.11	0	0	0	0	0	0	0	0	0	0	0	0	0	0	0.09	0	0	0
A230077H06Rik	0	0	0.68	0.5	0.33	0	0	0	0	0	0	0.56	0	0	0.14	0	0	0.32	0	0	0	0	0	0
Wwox	0	0	0.05	0	0	0.03	0.01	0.18	0	0	0	0	0	0.01	0	0	0	0	0	0	0.04	0.14	0.1	0.13
Abcg2	0.24	0.72	0.24	0	0	0.12	0	0	0.18	0	0	0	0.67	0	0	0	0.52	0	0	0	0	0	0	0
Id4	0.18	0	0	0.61	0.6	0.25	0	0	0	0	0	0	0	0	0	0	0.36	0	0	0	0	0	0	0
Olfr553	0	0	0.94	0	0.66	0	0	0	0	0	0	0	0	0	0	0	0	0	0	0	0	0	0	0
Large1	0	0	0	0	0	0	0	0	0	0	0	0.22	0	0	0	0	0	0.08	0.24	0.21	0.22	0.22	0.14	0.24
Tln2	0	0	0.09	0	0	0	0	0	0	0.03	0	0	0	0	0	0	0	0	0	0	0	0.15	0.05	0.14
Cfap61	0	0	0	0	0	0	0	0	0	0	0	0	0.13	0.47	0	0	0	0	0.35	0.35	0	0.4	0.39	0
Atp11a	0	0.06	0	0	0	0	0	0	0.15	0.07	0	0	0	0	0	0	0	0.09	0	0	0	0	0	0
Itih5	0	0	0	0	0	0	0	0.04	0	0	0.97	0	0.53	0	0.24	0	0.19	0	0	0	0	0	0	0
Nox1	0	0	0	0	0	0	0	0	0	0	0	0	0.16	0	0.77	0	0	0	0	0.17	0.04	0.16	0	0
Lingo4	0.75	0.29	0.8	0.08	0	0.22	0	0	0.26	0	0	0	0.08	0	0.34	0.61	0	0	0	0	0	0	0	0
Eml6	0	0.16	0.19	0.14	0.24	0.08	0	0	0	0	0	0	0	0	0.02	0	0.06	0.06	0	0	0	0	0.18	0
Msh3	0	0	0	0	0	0	0	0	0	0	0	0	0	0	0	0	0	0.34	0.31	0.01	0.23	0.17	0	0.03
Ccdc65	0	0	0.45	0.09	0	0.2	0	0	0	0	0	0	0	0	0	0	0.1	0	0	0	0	0	0.02	0
Ndrg4	0	0	0	0	0	0	0	0	0	0.13	0.17	0	0	0.09	0	0	0	0.01	0	0	0	0	0	0
Fggy	0.13	0	0	0	0	0	0	0	0	0.13	0	0	0	0	0	0	0	0.01	0	0	0	0	0	0
Plcxd3	0.42	0.19	0	0	0	0	0	0	0.13	0.36	0	0.2	0	0	0.08	0	0.08	0	0	0	0.16	0.21	0	0.25
Las1l	0	0	0	0	0	0	0	0	0	0	0	0	0.06	0	0	0.18	0.15	0	0	0	0	0	0	0
Cers6	0	0	0	0	0	0	0	0	0	0.07	0.31	0.41	0	0	0.09	0	0.22	0	0	0	0	0	0	0
Spint2	0	0	0	0	0	0	0	0.43	0	0	0	0	0	0	0	0	0	0	0	0.03	0	0	0	0.07
Fam167a	0.72	0.12	0.32	0.51	0	0.39	0	0	0	0	0	0	0	0	0	0	0.4	0	0	0	0	0	0	0
Dgkz	0.29	0	0	0	0	0	0.51	0	0	0	0.05	0	0	0	0	0	0.25	0.02	0	0	0	0	0	0
Snap25	0	0	0	0	0.17	0	0.2	0	0.23	0.1	0.08	0	0	0.15	0	0.02	0	0	0.22	0.08	0	0	0.15	0.2
Zfp827	0.01	0	0	0	0	0	0	0	0	0.28	0	0.5	0.1	0	0	0	0	0	0	0	0	0	0	0
Glg1	0.06	0.11	0	0	0	0	0.09	0	0	0	0	0	0	0	0	0	0.11	0	0	0	0	0	0.04	0
Rab37	0	0	0.02	0.58	0.6	0	0	0	0	0	0	0	0	0	0	0.92	0.74	0	0	0	0	0	0	0
Hcrt	0	0	0	0	0	0	0.07	0	0.08	0	0	0	0	0	0	0	0	0	0	0.05	0	0	0	0
Tmem145	0	0	0	0	0	0	0.34	0	0	0	0	0	0	0	0	0	0	0.33	0.38	0.16	0	0	0.44	0.66
Mrps11	0	0	0	0	0	0	0.59	0	0.06	0	0	0	0	0.07	0	0	0.05	0	0	0.24	0	0	0	0
Ska1	0	0	0	0	0	0	0.23	0	0	0	0	0.26	0.4	0	0	0.97	0	0	0	0.66	0	0	0	0
2810459M11Rik	0	0	0.65	0.07	0.06	0	0	0	0	0	0	0	0	0	0	0	0.12	0	0.06	0.09	0.43	0	0.7	0
Phlda1	0	0	0	0	0	0	0.15	0	0	0.02	0	0.45	0	0.12	0	0.86	0.16	0	0.1	0.01	0	0.01	0	0.12
Tenm2	0	0	0	0	0	0	0.24	0	0	0	0	0	0.02	0.24	0.24	0	0.05	0.25	0.25	0.25	0.24	0.25	0.25	0.24
Cdh4	0.06	0	0	0	0.16	0.16	0.37	0	0	0	0	0	0	0	0	0	0	0.34	0.25	0.4	0.26	0.18	0.22	0.2
2610035D17Rik	0	0.08	0	0	0	0	0.22	0	0.18	0	0	0	0	0	0	0	0.2	0	0	0	0	0	0	0
4930402H24Rik	0.16	0.04	0	0.05	0.04	0.09	0	0	0	0.05	0	0	0	0	0	0	0.19	0	0.06	0.01	0	0	0.08	0
Npr3	0.97	0.02	0.57	0	0.25	0	0	0	0	0	0	0	0	0	0	0	0.56	0	0	0	0	0	0	0
Tmem176a	0	0	0	0	0	0	0.2	0.85	0.77	0	0.01	0	0	0	0	0	0.15	0	0	0	0	0	0	0
Cdh2	0.34	0	0	0	0	0.19	0	0	0	0	0	0	0.18	0	0.25	0	0.21	0	0	0	0.07	0	0	0
C2cd2	0	0	0.03	0.02	0.08	0	0	0	0	0.17	0	0	0	0	0	0	0.14	0	0	0	0	0	0	0
Ctnna1	0	0.16	0.08	0	0	0	0	0	0	0	0	0	0	0	0	0	0.32	0.23	0	0	0	0	0	0
Nhsl1	0	0	0	0	0	0	0	0	0	0	0	0.18	0.97	0	0.08	0	0.28	0	0	0	0	0	0	0
Zkscan16	0.2	0.18	0	0	0	0	0	0	0.02	0	0	0	0	0	0	0	0	0	0	0	0	0	0	0
Slc45a4	0.01	0	0	0	0	0	0	0	0	0	0	0	0	0.12	0	0	0	0	0	0	0.51	0.05	0	0
D430019H16Rik	0	0	0	0	0	0	0	0	0.26	0.29	0	0.22	0.25	0	0	0	0	0	0	0	0	0	0	0
Zfyve28	0	0	0.01	0	0	0	0	0	0	0	0	0	0	0	0	0	0	0	0	0	0	0	0	0.12
Lonrf3	0	0	0	0	0	0	0	0	0	0	0	0.27	0.51	0	0	0	0.01	0	0.07	0.04	0.16	0.24	0.32	0.36
Olfr1426	0	0	0	0.94	0	0.93	0	0	0	0	0	0	0	0	0	0	0	0	0	0	0	0	0	0
Sel1l3	0	0	0	0	0	0	0	0	0	0	0	0.67	0	0.01	0	0	0	0	0.17	0	0.61	0.09	0.88	0.87
4933406I18Rik	0	0	0	0.08	0	0	0	0	0	0	0	0	0	0	0	0	0.28	0	0	0	0	0	0	0
Igsf21	0.17	0	0	0	0	0	0.6	0	0	0	0	0	0	0.38	0.34	0	0	0.67	0	0	0	0.59	0.04	0
Nsun2	0	0	0	0	0	0	0	0	0	0	0	0.03	0	0	0	0	0.03	0	0	0.01	0.3	0.04	0	0
Kctd16	0	0.74	0.32	0	0	0	0	0	0	0	0.05	0.24	0	0	0	0	0.53	0.77	0	0	0	0	0.29	0
Spata1	0	0	0	0	0	0	0	0	0	0	0	0.17	0	0	0	0	0.03	0	0.54	0	0	0.04	0	0
Crb1	0	0	0	0	0.35	0	0	0	0.21	0	0	0	0	0	0	0.01	0.11	0	0.81	0	0	0	0.48	0
Nespas	0.93	0.24	0	0	0.07	0	0	0	0	0.01	0	0	0.46	0	0	0	0.2	0	0	0	0	0	0	0
C130026L21Rik	0.06	0.06	0	0	0	0	0	0	0	0	0	0	0.08	0	0.01	0	0	0	0	0	0.04	0	0.02	0
Mfap3	0	0	0	0	0	0.08	0	0	0	0.08	0	0.13	0	0	0	0.02	0	0	0	0	0.07	0	0	0
Pdgfc	0	0	0	0.24	0.58	0.44	0	0	0	0	0	0	0	0	0	0	0.01	0	0.29	0.23	0.32	0.2	0.79	0
Kcnj6	0.08	0.28	0.29	0.34	0.17	0.19	0	0	0	0	0	0	0	0	0	0	0	0	0	0	0	0	0	0
Fam117a	0	0	0	0	0.5	0	0	0	0	0	0	0	0	0.13	0	0	0	0.61	0	0	0	0.8	0	0
Polr2a	0.01	0.01	0	0	0.07	0	0	0	0	0	0	0	0	0	0	0	0.29	0	0	0	0	0	0	0
Alk	0.96	0.62	0.72	0.64	0.53	0.46	0	0	0	0	0	0	0.4	0.03	0	0.29	0.05	0	0	0	0	0	0	0
Ccbe1	0	0	0	0	0	0	0.96	0	0	0	0	0	0	0.93	0	0	0	0	0.56	0.83	0	0.83	0	0
Prrg1	0	0	0	0	0	0	0	0.79	0	0.73	0.45	0	0	0	0	0	0.16	0	0	0	0.02	0	0	0
Flot1	0	0	0	0	0.1	0	0	0	0	0	0	0	0	0	0	0	0.06	0.05	0	0	0	0	0	0.18
Spats2l	0.49	0	0	0	0	0	0	0	0	0	0	0.83	0.49	0.48	0.49	0	0.03	0	0	0	0.07	0.18	0	0
Fam111a	0	0	0	0	0	0	0	0	0	0	0	0	0	0	0	0.01	0.46	0	0	0.02	0	0	0.18	0
Mamld1	0	0	0	0.29	0.51	0	0	0	0	0.21	0	0.16	0	0	0	0	0	0	0	0	0	0	0	0
Lrrc1	0	0	0	0	0	0	0	0	0	0.87	0.16	0.76	0.1	0	0	0	0	0	0	0	0	0.01	0	0
A330008L17Rik	0	0	0	0	0	0.12	0	0	0	0.77	0.92	0	0	0	0	0	0.23	0	0	0	0	0	0.07	0.71
Sult2b1	0	0	0.31	0	0.73	0	0	0	0	0	0	0	0	0.06	0.09	0	0.02	0.09	0	0	0	0	0	0
4833422C13Rik	0.09	0.03	0.18	0.6	0.01	0	0	0	0	0	0	0.12	0	0	0	0	0	0	0	0	0	0	0	0
Rras2	0	0.35	0.16	0.03	0.24	0	0	0	0	0.27	0	0.48	0	0	0	0	0.08	0	0	0	0	0	0	0
Tbc1d9	0	0	0	0	0	0	0	0	0	0	0	0	0	0	0	0	0	0	0	0.08	0	0.21	0	0
Gusb	0	0	0	0	0	0	0.66	0	0.37	0	0	0	0	0	0	0	0.11	0	0.17	0.33	0	0.22	0	0
4930445B16Rik	0	0	0	0.04	0	0.08	0	0.24	0.28	0.61	0	0	0	0	0	0	0.39	0	0	0	0	0	0	0
Ddr1	0	0.07	0	0	0	0	0	0	0	0	0.11	0	0	0	0	0	0.39	0	0.01	0	0	0	0	0
Fam83b	0	0	0	0	0	0	0	0.64	0	0	0	0	0	0	0	0.18	0	0	0.49	0.98	0.91	0.22	0	0.35
Ano3	0	0	0	0	0	0	0	0	0	0	0	0	0	0.22	0	0	0	0.2	0.44	0	0.82	0.58	0.64	0.5
A330074K22Rik	0	0	0.14	0	0.29	0.27	0	0	0	0	0	0	0	0	0	0	0.03	0	0	0	0.06	0	0	0
Gabrg2	0	0	0	0	0	0	0	0	0	0	0	0	0	0	0.14	0.09	0	0.21	0	0.05	0	0.16	0	0.13
Tnnt2	0.12	0	0.9	0.94	0	0	0	0	0	0	0	0.3	0	0	0	0	0.34	0	0	0	0	0	0	0
Ehhadh	0.2	0.37	0	0	0	0	0	0	0	0.73	0	0.85	0	0	0.21	0	0.73	0	0	0	0	0	0	0
Kcnc2	0.49	0.23	0.19	0	0	0.2	0	0.33	0	0	0.21	0.26	0.3	0	0	0.14	0.11	0	0	0.14	0	0	0	0
Smap1	0	0	0	0	0	0	0	0	0	0	0	0	0	0	0	0	0	0	0.23	0.05	0	0.13	0	0
Zap70	0.72	0.33	0.69	0.83	0.58	0.05	0	0	0	0	0	0	0	0	0	0	0.17	0	0	0	0	0	0	0
Igsf11	0.47	0	0	0	0.71	0	0	0	0	0	0	0	0	0	0	0.21	0	0	0.16	0	0	0	0	0
Mylip	0.66	0.68	0	0.38	0.02	0.1	0	0	0	0	0	0	0.41	0	0	0	0	0	0	0	0	0	0	0
Sytl2	0.29	0.54	0.35	0.62	0	0.01	0.17	0	0	0	0	0	0	0	0	0.11	0.31	0	0	0	0	0	0.02	0
Sik3	0.08	0	0	0	0	0	0.02	0	0	0	0	0	0	0	0	0	0.21	0.14	0.02	0	0	0	0.14	0
Rab31	0	0	0	0	0	0	0	0	0	0	0	0	0.09	0.65	0.27	0	0.27	0	0	0	0.07	0	0	0.33
Tbkbp1	0	0	0	0	0	0	0	0	0	0	0	0.32	0.27	0	0	0	0	0	0	0	0.15	0	0	0
Spred3	0	0	0	0	0	0	0.17	0	0	0	0.04	0	0.35	0	0.04	0	0.2	0	0	0	0	0	0	0
Sphkap	0.05	0	0	0.08	0.52	0.91	0.5	0.36	0.53	0	0	0	0	0	0	0	0.36	0	0	0	0	0	0	0
Srsf1	0	0	0	0	0	0	0	0	0	0.04	0	0.01	0.02	0	0	0	0.21	0	0	0	0	0	0	0
Qpct	0	0	0	0	0	0	0.1	0	0.34	0	0	0	0	0	0	0	0.16	0	0	0	0	0	0	0
Tm6sf1	0	0	0	0.07	0	0	0	0	0	0	0	0	0	0	0	0	0.59	0	0	0	0	0	0.5	0
Cdh8	0.1	0.15	0	0	0	0.21	0	0	0	0.48	0.78	0	0	0	0	0.18	0.3	0.18	0	0	0	0	0.07	0.49
Acvr1c	0	0	0	0	0	0	0	0	0	0	0	0	0	0	0	0	0	0.63	0.94	0.91	0	1	0	0.38
Sema3c	0	0	0.83	0.72	0	0.53	0	0	0	0	0	0.19	0	0	0.29	0	0.37	0	0	0	0.43	0	0	0
Pofut1	0	0	0	0	0	0	0	0	0	0	0	0	0	0	0	0	0.25	0.04	0	0	0	0	0	0
Trmt1	0	0	0	0	0.02	0	0	0	0	0	0	0.06	0	0	0	0	0.05	0	0	0.01	0	0	0	0
Megf10	0.28	0	0	0.25	0	0.7	0	0	0	0	0	0	0	0	0.36	0	0.24	0	0	0	0.22	0	0	0
Cdh9	0.56	0.35	0	0	0.5	0.09	0	0	0.57	0	0	0	0.56	0	0	0.63	0	0	0	0	0	0	0	0
D3Ertd751e	0.02	0	0	0	0	0	0	0	0	0	0	0	0	0	0	0	0.26	0	0	0	0	0	0	0.11
Osbpl3	0	0	0	0	0.55	0	0	0.1	0	0	0	0	0	0.31	0.85	0	0.36	0	0	0.36	0.51	0.79	0.05	0
Ckmt1	0	0	0	0.04	0.34	0.2	0	0	0	0	0	0	0	0	0	0	0.13	0	0	0	0	0	0	0
Mapk15	0	0	0.51	0	0	0.04	0	0	0	0.34	0	0	0	0	0	0	0.08	0	0.02	0.29	0.28	0.05	0	0.25
Myo3b	0	0.34	0.1	0	0	0	0	0.56	0	0	0	0.7	0	0	0	0.11	0.51	0	0	0	0	0.49	0	0
Limk2	0.28	0	0	0	0	0	0	0	0	0.16	0.04	0	0	0	0	0	0	0	0	0	0	0	0	0
Kalrn	0.22	0.18	0	0.06	0.15	0	0	0	0	0.03	0	0.17	0	0	0	0	0.02	0.11	0.02	0	0.12	0	0.11	0
Ppp4r4	0	0	0	0	0	0.04	0	0	0	0	0	0	0	0	0.6	0	0	0	0.01	0	0	0.05	0	0
Cavin4	0	0	0	0	0	0	0.08	0	0	0.08	0	0.81	0	0	0	0	0.03	0	0.7	0.3	0	0.45	0.33	0.53
Cntnap5b	0.71	0.21	0.29	0	0	0	0.22	0	0.26	0	0	0	0	0	0.01	0	0	0.13	0	0	0.38	0	0.1	0
B4gat1	0	0	0	0	0	0	0.07	0	0.2	0	0	0	0	0	0.03	0	0	0	0	0	0	0	0	0
Lrriq1	0	0	0.12	0	0	0	0	0	0	0	0	0	0	0	0	0	0.06	0	0.57	0	0	0	0.01	0.02
Trpm4	0.11	0	0	0.19	0	0.1	0	0	0.32	0	0	0	0.01	0	0	0.05	0.53	0.51	0	0	0	0	0	0.02
Tgfbr3	0	0	0	0	0	0	0.03	0	0.3	0	0	0	0	0	0	0	0	0	0.49	0.76	0.01	0.16	0.6	0.41
Scn5a	0	0	0	0.01	0.54	0.6	0	0	0	0	0	0	0	0	0	0	0	0.84	0	0.05	0	0	0.19	0.75
Spata6	0	0	0	0.21	0	0.12	0	0.04	0	0	0	0	0	0	0	0	0.5	0.84	0.08	0	0	0	0	0.82
Mug1	0	0	0	0.2	0.94	0	0	0	0	0	0.56	0	0	0	0.65	0	0	0	0	0	0	0.13	0	0
Tspan18	0.51	0.42	0.56	0.81	0.07	0.08	0	0	0	0.54	0	0	0.25	0	0	0	0.2	0	0	0	0	0	0	0
Fam71e1	0.12	0.18	0	0.54	0	0	0	0.17	0	0	0	0	0	0	0	0	0.15	0	0	0	0	0	0	0
Itga5	0	0.45	0	0	0	0.22	0.46	0.09	0	0.26	0	0	0	0.2	0	0	0.04	0.03	0	0	0	0	0	0
Caln1	0	0	0	0.08	0.22	0	0	0	0	0.36	0.35	0.3	0	0.04	0	0	0.07	0	0	0	0.09	0.2	0	0
Fam196b	0	0	0	0.44	0.34	0.04	0	0	0	0	0.19	0	0	0	0	0	0	0	0	0	0	0.04	0	0
Jmjd1c	0	0	0	0	0	0	0	0	0	0	0	0	0	0.01	0.05	0	0.19	0	0	0	0	0	0	0
Aldh2	0	0	0	0	0.27	0.33	0	0	0	0	0	0	0	0	0	0.05	0.01	0.36	0.01	0	0	0	0	0
Ank2	0.02	0	0	0	0.02	0	0	0	0	0.15	0	0.18	0	0	0	0.1	0.2	0.23	0.24	0.2	0.24	0.2	0.24	0.19
Numa1	0.06	0.18	0	0.06	0.02	0	0	0	0	0	0	0	0	0	0	0	0	0.03	0	0	0	0	0	0
Hdac3	0	0	0	0	0	0	0	0	0.05	0	0	0	0	0	0	0	0.31	0	0	0	0	0	0	0.1
Pcdh11x	0.81	0.56	0	0	0	0.17	0.37	0.53	0.09	0.34	0.56	0	0	0.28	0.11	0	0.13	0.21	0.13	0	0	0	0	0
Pdss2	0	0.09	0	0.02	0	0	0	0	0	0	0	0	0	0	0	0	0.19	0	0.04	0	0	0	0	0
Cyp4f17	0.86	0.91	0.27	0	0	0	0.5	0	0	0	0	0	0	0.04	0	0	0.4	0	0	0	0	0	0	0
Reck	0	0	0	0	0	0	0	0	0	0	0.07	0	0	0	0	0	0.12	0	0.59	0.47	0	0.14	0.53	0
Rarb	0	0	0.01	0.75	0	0	0	0	0	0.14	0	0.82	0	0	0	0	0.4	0	0.04	0	0	0	0	0
Hecw2	0	0	0.2	0	0.2	0	0.19	0	0	0	0	0	0	0	0	0	0	0	0	0	0.16	0.11	0.13	0
Begain	0.03	0	0	0	0	0.08	0	0	0	0	0	0	0	0	0	0	0.14	0	0	0.31	0	0	0	0
Nrsn1	0.12	0.25	0.31	0	0.27	0	0	0	0	0	0	0	0.08	0	0	0.01	0.32	0	0	0	0	0	0	0
Uhrf2	0.18	0.15	0	0	0	0	0	0	0	0	0.09	0	0	0	0	0	0.12	0	0	0	0	0	0	0
Dtnb	0.01	0	0	0	0	0	0	0	0	0	0	0.35	0	0	0	0	0.13	0	0	0	0	0	0	0
Pkm	0	0	0	0	0	0	0	0	0	0	0	0	0	0.14	0	0.04	0.04	0	0	0	0	0	0	0.1
Fam172a	0	0	0.02	0	0	0	0	0	0	0	0	0.07	0	0	0	0	0.02	0	0	0	0.1	0	0	0
BC024139	0	0	0.92	0	0	0.83	0	0	0	0.38	0	0	0	0	0	0	0.12	0	0	0	0	0	0.34	0
Arhgef26	0	0	0.33	0.19	0	0.53	0	0	0	0.44	0.51	0.28	0	0	0	0	0.06	0.21	0	0	0.95	0	0.35	0
Dlc1	0	0.05	0	0	0	0	0	0	0	0.15	0.01	0	0	0	0	0	0	0	0	0.22	0	0.11	0.13	0.02
Dlgap2	0	0	0.18	0	0	0	0	0	0	0	0	0	0	0	0.09	0	0	0	0.23	0.24	0	0	0.22	0
Btbd16	0	0	0.87	0.5	0.18	0	0	0	0	0	0	0	0	0	0	0	0.33	0	0	0	0	0	0.61	0
Prickle1	0	0	0	0	0	0	0	0	0	0	0	0	0	0	0.1	0	0.04	0	0.23	0.21	0.14	0.24	0.21	0.13
Optn	0	0	0	0	0	0	0	0	0	0	0	0.05	0	0	0	0	0.02	0	0.05	0.32	0	0.03	0.67	0.22
Ttc39aos1	0	0	0	0	0	0	0	0	0.16	0	0	0	0	0	0	0	0.36	0	0	0	0	0	0	0.26
Selplg	0.15	0.03	0.39	0.23	0.47	0	0	0	0	0.13	0.27	0.11	0	0	0	0	0	0.14	0	0	0	0	0	0
Tsc22d1	0	0	0.08	0.02	0.07	0	0	0	0	0	0	0.03	0	0	0	0	0.11	0	0	0	0	0	0	0
Rps6ka3	0.6	0	0	0.09	0.54	0.73	0	0	0	0	0	0	0.04	0	0	0	0.11	0	0	0	0	0	0.08	0
Sgk3	0	0	0.06	0	0.4	0	0	0	0	0.87	0.35	0.66	0	0	0	0	0	0	0	0	0.57	0	0	0
Sntg2	0.41	0	0.55	0	0	0	0	0	0	0	0	0	0.29	0	0.31	0	0	0	0	0	0	0.15	0.74	0.09
Lamp5	0	0	0.12	0	0.87	0.27	0	0	0	0	0	0.96	0	0	0	0	0.2	0	0	0	0.24	0	0	0
Slc20a2	0.01	0	0	0	0	0	0	0	0	0.03	0	0	0	0	0.34	0	0	0.63	0	0	0.01	0	0.11	0
Ror2	0	0	0.06	0	0.6	0	0	0	0	0.91	0.21	0.7	0.25	0	0	0	0	0	0	0	0	0	0.18	0
Slc4a4	0	0	0	0	0	0	0	0	0	0	0	0.49	0	0	0	0	0.47	0	0.08	0	0	0.11	0.5	0
Dab1	0.18	0	0.23	0.22	0.23	0.23	0	0.24	0.22	0.19	0.01	0	0	0	0	0	0	0.08	0.13	0	0.07	0	0.05	0
Rimbp2	0	0	0	0	0	0	0	0	0	0	0	0.12	0	0	0	0	0	0.01	0.03	0.03	0	0.09	0	0.03
Mthfs	0	0	0	0	0	0	0	0	0.08	0	0	0	0	0	0	0	0.03	0	0	0.02	0	0	0	0
Prtg	0	0	0	0	0	0.04	0	0	0	0	0	0	0.47	0	0.03	0	0.47	0	0.08	0.58	0	0.17	0	0
Kcnd3	0	0	0	0	0	0	0	0	0	0	0	0	0	0.23	0	0	0.17	0.12	0.43	0.35	0	0	0	0.12
Sgms1	0	0	0	0	0	0	0.17	0.27	0	0	0	0.08	0	0	0	0	0.17	0.02	0	0	0	0	0	0
Sostdc1	0	0	0.82	0	0	0	0.16	0	0.89	0	0	0	0	0	0	0	0.06	0	0.1	0	0	0	0	0
Csmd1	0.18	0.1	0.2	0.08	0.16	0.21	0.08	0.21	0.16	0.09	0	0.1	0	0	0	0.09	0.11	0	0	0.21	0.24	0.25	0.17	0
Zfp609	0.16	0.03	0	0	0	0	0	0	0.01	0	0	0.03	0.16	0	0	0	0.19	0	0	0	0	0	0	0
Ptprn2	0	0.1	0	0	0	0	0.19	0	0.02	0.11	0	0.01	0	0	0	0	0.15	0.16	0.02	0	0	0	0.11	0.05
Pparg	0	0	0	0	0.03	0	0	0	0.97	0.07	0	0.39	0	0	0	0	0.12	0	0	0	0.17	0	0	0
Dlx1	0	0	0.22	0	0	0	0	0	0	0	0	0.21	0	0	0.59	0	0.96	0	0	0	0	0	0	0
Pde7b	0	0	0	0	0.37	0.25	0	0.18	0.44	0.43	0	0.52	0	0	0	0	0.06	0.57	0	0	0.02	0	0	0.44
Snrnp70	0.17	0.03	0	0	0	0	0.15	0	0	0	0	0	0	0	0	0	0.24	0	0.1	0.15	0.03	0.07	0.06	0.08
Ftx	0	0	0	0	0	0	0.08	0.08	0.1	0.13	0.03	0	0	0	0	0	0.15	0.1	0	0	0	0	0	0
Casp1	0	0	0.42	0	0	0	0	0	0.51	0.9	0.77	0	0	0	0	0	0.42	0	0	0	0	0	0.08	0
Ahr	0	0	0	0	0	0	0	0	0	0	0	0	0	0.1	0	0	0	0	0.11	0.28	0	0	0.4	0.17
Ptprj	0	0	0	0.01	0	0.16	0	0	0	0.07	0	0.12	0	0	0	0	0	0.17	0	0	0	0	0	0
Tbx3	0	0	0	0	0	0.46	0	0	0	0.72	0	0.96	0	0	0	0	0.76	0	0	0	0	0	0	0
Tle4	0.78	0.29	0	0	0	0	0	0	0	0	0.73	0.02	0.12	0	0	0	0.02	0.03	0	0	0	0	0	0
Umodl1	0	0	0	0	0	0	0	0	0	0	0	0	0	0	0.01	0	0	0	0.89	0.71	0	0.36	0.68	0.89
Mc4r	0	0.96	0.36	0.25	0.39	0	0	0	0	0.1	0.3	0.93	0	0	0	0	0	0	0	0	0	0	0	0
Rnf121	0	0	0.15	0.04	0	0	0	0	0	0	0	0	0	0.16	0	0	0.14	0	0	0.11	0	0.07	0	0
Osbpl8	0	0	0	0	0.47	0	0	0	0	0.4	0.1	0	0	0	0	0	0	0	0	0	0	0	0	0
Caprin2	0	0	0	0	0	0.19	0.13	0	0.32	0	0	0	0	0.07	0	0	0.48	0	0	0	0	0	0	0
C79798	0	0	0	0	0.27	0	0	0	0	0	0	0.34	0	0	0	0	0.73	0	0	0	0.38	0	0.34	0.22
Sun1	0	0	0	0	0	0	0	0.03	0	0	0	0.21	0	0	0	0	0	0	0	0	0	0	0	0
Mast2	0	0	0	0	0	0	0.21	0.06	0.15	0.16	0	0	0	0	0	0	0.07	0	0	0	0	0	0	0
Atrnl1	0	0	0	0	0	0	0	0.24	0	0	0	0	0	0.21	0.11	0.21	0	0.23	0.07	0.17	0.05	0.17	0.17	0.2
Prex1	0	0	0.09	0	0	0	0.1	0.11	0	0	0	0	0	0	0	0	0.4	0	0	0.01	0	0	0.35	0
Eml1	0	0.07	0	0.06	0	0.08	0	0	0	0	0	0	0	0	0	0	0	0.31	0	0	0	0	0	0
Oprd1	0	0	0	0	0	0	0	0	0	0	0	0	0	0	0.09	0	0.11	0	0.49	0.77	0.94	0.29	0	0.41
Zmiz1	0.06	0	0	0	0.16	0.21	0.4	0	0	0	0	0	0	0	0	0	0	0	0	0	0	0	0	0
Pctp	0	0.48	0	0	0.07	0	0	0	0	0.2	0	0.77	0.67	0	0	0.38	0.42	0	0	0.03	0	0.92	0	0
Csf1	0.19	0.53	0.05	0	0	0	0.09	0	0.13	0	0	0	0.08	0	0	0	0.17	0	0	0	0	0	0.1	0
Macf1	0.16	0.04	0.07	0	0.06	0	0	0	0	0	0	0	0	0	0	0	0.22	0.09	0.14	0.1	0.13	0	0.22	0.08
Col9a3	0.65	0	0	0.19	0	0	0	0	0.54	0.36	0	0	0	0	0	0	0.93	0	0	0	0	0	0	0
Cep120	0	0.22	0	0	0	0	0	0	0	0	0.11	0.02	0	0	0	0	0	0	0	0	0	0	0	0
Lgmn	0	0	0	0	0	0	0.28	0.15	0.05	0	0	0	0	0	0	0	0.09	0	0	0	0	0	0	0
Gpr179	0	0.24	0	0	0	0	0.04	0	0.81	0	0	0.03	0	0.29	0	0	0.93	0	0	0	0	0	0	0
Mirg	0	0	0	0.07	0	0.16	0	0	0	0	0	0.02	0.01	0.03	0	0	0	0	0	0	0	0	0.02	0.12
Cntnap2	0	0	0	0	0	0	0.02	0.03	0.17	0.13	0	0	0	0	0	0	0.25	0.24	0.25	0	0	0	0.25	0.25
Ankrd42	0	0.08	0	0	0	0	0	0	0	0	0	0	0	0	0	0	0	0	0	0	0	0	0	0
Mroh1	0.02	0	0	0	0	0.17	0	0	0	0	0	0	0	0	0	0	0.28	0	0	0	0	0	0	0
Gk5	0.38	0.28	0	0.11	0.37	0	0	0.24	0	0.05	0	0	0	0	0	0	0.09	0	0	0	0	0	0	0
Sorcs2	0	0	0	0	0	0	0.55	0	0	0.75	0	0.08	0	0	0	0.31	0.13	0	0	0.53	0.12	0	0	0.13
Cntn4	0	0	0	0	0	0	0	0	0	0	0	0.16	0.22	0.59	0.42	0.31	0.04	0.19	0.23	0	0.52	0.85	0.22	0.13
Nr5a2	0	0	0	0	0	0	0	0.12	0	0.04	0	0	0	0	0	0.97	0.4	0	0	0	0	0	0	0
Nmbr	0.36	0	0	0	0	0.13	0	0	0	0	0	0	0	0.93	0.92	0	0.32	0	0	0	0	0.26	0	0
Amph	0.14	0.21	0.12	0	0	0	0.01	0	0	0	0	0	0	0	0.12	0	0	0	0	0	0	0	0.03	0
9630002D21Rik	0	0	0	0	0.81	0.25	0	0.13	0	0	0	0	0	0	0	0	0.04	0.02	0	0	0.8	0	0	0
Coro6	0.67	0.44	0.28	0.29	0	0.62	0	0	0	0	0	0.48	0	0	0	0.64	0.38	0.04	0	0	0.05	0	0	0
Xkr4	0.02	0.18	0.18	0.07	0.26	0.19	0	0	0	0	0	0	0	0	0	0	0.17	0.13	0.18	0.11	0	0	0.2	0
Dusp15	0.04	0	0	0.26	0	0	0	0	0	0	0	0	0	0	0	0	0.04	0	0.18	0	0	0	0	0
Arhgap10	0	0	0.05	0.55	0	0	0	0	0	0.45	0.12	0	0	0	0	0	0	0	0.37	0.06	0	0	0.1	0.18
Hpgd	0	0	0	0	0	0	0	0	0	0.9	0.73	0	0.16	0	0	0	0.1	0.02	0.08	0	0	0	0.36	0.77
Sirt5	0	0	0	0	0	0	0	0	0	0	0	0.01	0	0	0	0	0.44	0	0	0	0	0	0	0.55
Usp46	0	0	0	0	0	0	0	0	0	0	0	0	0	0	0	0	0	0	0	0.09	0	0	0	0
Gfod1	0	0	0	0.43	0.44	0	0	0	0	0	0	0.04	0	0	0	0	0.04	0	0	0	0	0	0	0
Duox2	0	0	0	0	0	0	0.05	1	0.21	0	0	0	0	0	0	0	0.26	0	0.14	0	0	0	0.16	0
Ust	0	0	0.24	0	0	0	0	0.89	0.61	0.83	0.62	0.89	0	0	0	0	0	0	0	0	0	0	0	0
Zfand3	0.15	0	0	0	0.08	0.06	0	0	0	0	0	0	0	0	0	0	0	0.04	0	0	0.02	0	0	0
Fut1	0	0	0.26	0.39	0.44	0.4	0	0	0	0.56	0.17	0	0	0	0	0	0	0	0	0	0	0	0	0.25
Kcnh5	0	0.01	0	0	0.37	0	0	0	0	0	0.04	0.08	0.09	0	0.36	0	0	0	0	0	0.64	0	0	0
Lepr	0	0	0	0	0	0	0	0	0	0	0	0	0	0	0	0	0.26	0	0.97	0.69	0.15	0.1	0.86	0.28
Trim62	0.6	0.44	0	0	0.07	0	0	0	0	0	0	0	0	0	0	0	0	0	0	0	0	0	0	0
Eva1c	0	0.75	0.64	0.87	0	0.69	0	0	0	0	0	0	0	0	0	0	0.44	0	0	0	0	0	0	0
Trpc7	0	0	0	0.41	0.31	0	0.89	0	0	0	0	0.64	0	0.26	0	0	0.1	0.39	0	0	0	0	0	0
Mras	0	0	0	0	0	0	0	0	0	0	0	0	0.13	0	0.3	0	0.06	0	0	0	0	0	0	0.3
Magi1	0	0	0.17	0.03	0.13	0	0	0	0	0	0	0.12	0	0	0	0	0.03	0	0.1	0.14	0.21	0.21	0.23	0
Gabbr1	0	0	0	0	0	0	0	0.02	0	0.06	0.02	0.09	0.05	0.07	0.02	0	0	0	0	0	0	0	0	0
Kcnk12	0	0	0	0	0	0	0	0.73	0.7	0	0	0.42	0	0	0	0	0.09	0	0	0	0	0	0.01	0
Ppp1r13b	0	0	0	0	0	0.11	0	0	0	0	0	0	0.02	0	0	0	0	0	0.04	0	0	0	0	0
Nr3c1	0	0	0	0	0	0	0	0.27	0.28	0	0.12	0	0	0	0	0	0	0	0	0	0	0.12	0	0
Reep3	0.01	0	0	0	0	0	0	0	0	0	0	0	0	0.02	0	0	0.27	0	0.06	0	0	0	0	0
Deptor	0	0	0	0	0	0	0	0	0	0	0	0	0	0.27	0.16	0.38	0	0	0.41	0.4	0.15	0.34	0	0.42
Magi2	0	0	0	0	0.14	0.14	0	0	0	0.24	0.23	0.17	0	0	0.2	0.05	0.24	0.22	0.01	0	0.24	0.13	0.15	0
March1	0.21	0.25	0	0	0	0	0.08	0	0.12	0.2	0.02	0	0.24	0	0	0.16	0.09	0	0.23	0.21	0	0	0.02	0
Usp3	0	0	0	0	0	0	0	0	0	0	0	0	0	0	0	0	0.37	0.11	0.72	0	0	0	0	0
Cap2	0.01	0	0	0	0	0	0	0	0	0.3	0	0.24	0.18	0.17	0.37	0	0	0	0	0	0.01	0.35	0	0
Pigk	0	0.18	0.14	0.3	0.06	0.28	0	0	0	0	0.09	0	0	0	0	0	0.21	0.12	0	0	0	0	0	0.19
Rabif	0	0	0	0	0	0	0	0	0	0	0	0	0	0	0	0	0.42	0	0.14	0	0	0	0.02	0.45
Traip	0	0	0	0	0	0	0	0	0	0	0	0.26	0	0	0	0	0	0	0.6	0.37	0.04	0	0.38	0.25
Unc80	0.02	0.09	0	0	0	0	0.05	0	0	0.14	0	0.04	0	0	0.13	0	0	0.11	0	0	0.07	0	0	0
Vwa1	0	0.51	0.13	0	0	0	0.73	0	0.04	0	0	0	0.15	0	0	0.07	0.19	0	0	0	0	0	0	0
Gng4	0	0	0	0.07	0.28	0.16	0	0	0	0.14	0.16	0	0	0	0	0	0.15	0	0	0	0	0	0	0
Cdh7	0.41	0	0	0	0	0	0	0.73	0.48	0.88	0.7	0.86	0.18	0	0	0	0	0	0	0	0	0	0	0
Susd2	0.04	0	0	0.06	0	0.18	0	0	0	0	0	0	0	0	0	0	0.2	0	0.04	0.14	0	0	0	0.03
Miat	0.15	0.06	0.12	0	0.07	0.12	0	0	0	0	0	0	0.02	0	0	0	0	0	0.05	0.01	0.22	0	0	0.2
Tnrc6a	0.04	0.22	0	0	0	0	0	0	0	0	0.11	0.02	0	0	0	0	0	0.04	0	0	0	0	0	0
Prkdc	0	0	0	0	0	0	0	0	0	0.11	0.32	0	0	0	0	0	0.27	0	0	0	0	0	0	0
Pitpnc1	0	0	0	0	0	0	0	0	0	0	0.29	0.05	0	0.12	0	0.11	0.32	0.18	0.27	0.16	0	0.34	0	0.39
Camk2g	0.17	0.05	0	0	0.01	0	0	0	0	0	0	0	0	0	0	0	0.23	0.09	0.1	0	0	0	0	0
Dnah10	0.18	0.12	0	0.53	0.42	0.12	0	0	0	0	0	0	0.2	0	0	0	0.26	0	0	0	0	0	0	0
Arhgef33	0.04	0.04	0	0.04	0	0	0	0	0	0	0	0	0	0	0	0	0.04	0	0	0	0	0	0.02	0
Fgf12	0	0.05	0	0	0	0	0	0.12	0	0.14	0	0.16	0	0	0.04	0	0	0.16	0	0	0.05	0	0.07	0
Fmn1	0	0	0.36	0.7	0.7	0.49	0	0	0	0	0	0	0	0	0	0	0.28	0	0	0	0.14	0	0.11	0
Skap1	0.86	0.5	0	0.38	0	0.29	0	0	0	0	0	0.26	0.08	0	0.13	0	0.16	0	0	0	0	0	0	0
4921534H16Rik	0	0	0	0	0	0	0.59	0.57	0.4	0.61	0.48	0	0	0	0	0	0	0.41	0	0	0	0	0	0.41
Lrrfip1	0	0	0	0	0	0	0.03	0	0	0	0	0	0	0.12	0.06	0	0	0.16	0.18	0.1	0	0	0.05	0.13
Gck	0	0	0	0	0	0	0	0	0	0	0	0	0	0	0.13	0	0.01	0	0.55	0.42	0	0.14	0.06	0.72
Sash1	0.31	0.2	0.25	0.23	0	0.38	0	0	0	0	0	0.68	0.07	0	0	0	0.37	0.32	0	0	0	0	0	0
Crebrf	0	0.07	0	0	0	0	0	0	0	0.03	0.07	0	0	0	0.05	0	0	0	0	0	0	0	0	0
Sik2	0	0	0	0	0	0	0.07	0	0	0.06	0	0	0	0	0	0	0	0	0	0	0	0	0	0
Wtip	0	0.22	0	0	0.29	0	0	0	0	0	0	0.48	0	0	0	0	0	0	0	0	0	0	0	0
Rcbtb2	0.02	0	0	0	0	0	0	0	0.08	0	0	0	0	0	0	0	0.4	0	0	0	0	0	0.15	0
Slc22a3	0	0	0.06	0.18	0	0	0	0	0	0.05	0.62	0.6	0	0	0	0	0.07	0	0	0	0	0	0.96	0
Igf1r	0	0	0	0	0.28	0	0.01	0	0.12	0	0	0.22	0	0	0	0	0.15	0	0	0	0.01	0	0	0
Lrrtm4	0	0.23	0	0	0.2	0.19	0	0.24	0.24	0.39	0.28	0.08	0	0.23	0	0.25	0.22	0.25	0	0	0	0	0	0.15
Kcnn2	0.11	0.11	0	0.12	0.16	0.13	0.04	0	0	0	0	0	0.11	0.11	0.26	0	0.25	0.19	0	0	0	0	0	0
Dach2	0	0	0	0	0	0	0	0.27	0.9	0.48	0.48	0.05	0	0	0	0	0.34	0	0	0	0.32	0	0	0
Phactr2	0.6	0	0.3	0.55	0.72	0.69	0	0	0	0	0	0	0	0	0	0	0.36	0	0	0	0	0	0.02	0
H2-Q2	0	0.29	0.59	0.17	0	0	0	0	0	0	0	0	0	0	0.2	0	0	0	0.67	0.82	0.07	0.05	0.51	0
Ankdd1a	0.06	0	0.11	0.37	0	0.39	0	0	0.02	0.16	0	0	0	0	0	0	0.17	0	0	0.01	0	0	0	0
Ubl3	0.35	0.28	0	0	0	0	0	0	0	0	0	0	0	0	0	0	0.01	0.03	0	0	0	0	0	0
Prkacb	0	0	0	0	0	0	0.03	0	0.06	0	0	0.11	0.06	0.1	0	0	0	0	0	0	0	0	0	0
Slc24a5	0.1	0.01	0	0	0.11	0	0	0	0	0	0.03	0	0	0	0	0	0.2	0	0	0.07	0	0	0	0
Arhgap36	0.94	0	0	0	0	0	0	0	0	0	0	0	0	0	0.12	0.54	0.17	0.17	0.25	0	0	0	0	0.16
Snca	0.35	0	0	0	0.5	0	0	0	0	0	0	0	0	0	0.71	0	0.06	0	0	0	0.17	0.04	0	0
Slc17a8	0	0	0	0	0	0	0.98	0	0.99	0	0	0	0	0	0	0.02	0.08	0	0	0	0	0	0	0
Suclg2	0.27	0	0	0	0	0	0	0	0	0	0	0	0	0	0	0	0.05	0	0.15	0	0.47	0	0.36	0
Dhcr24	0	0	0.1	0	0	0	0	0	0	0	0	0	0	0	0	0	0.04	0	0	0	0	0	0.11	0
Fam227a	0.02	0	0	0.27	0	0	0	0	0	0	0	0	0	0	0	0	0	0	0	0	0	0	0	0
Slco5a1	0	0.89	0	0	0.14	0	0	0	0	0.07	0	0	0.06	0	0.36	0	0.16	0	0.31	0	0	0	0	0
Sox5os2	0	0	0	0	0	0	0.1	0	0	0	0	0	0.81	0	0	0.04	0.01	0.54	0.81	0.96	0	0	0	0.75
B430010I23Rik	0	0	0	0.09	0.04	0	0	0	0.19	0	0	0	0	0	0	0	0.19	0	0.03	0	0	0	0.06	0
Evl	0.18	0.12	0	0	0.16	0.04	0	0	0	0	0	0.02	0	0	0	0	0.17	0	0	0	0	0	0	0
Fam185a	0	0	0	0	0	0	0	0	0	0	0	0	0.02	0	0	0	0	0	0.02	0.37	0	0.15	0.61	0.32
Col24a1	0.73	0	0	0	0	0	0.03	0	0	0	0	0	1	0	0	0	0	0.11	0	0	0	0.13	0	0
Aldh1l2	0.51	0.19	0	0	0.03	0	0	0	0	0	0	0	0.43	0	0	0.16	0.15	0.12	0	0	0	0	0	0
F2r	0.29	0	0.33	0	0	0	0	0	0	0	0	0	0	0	0	0	0.14	0	0.09	0.6	0	0	0.07	0
Nefl	0	0	0	0	0	0	0	0	0	0	0	0	0	0.22	0.04	0	0	0	0	0	0	0	0	0
Rac3	0.08	0.05	0	0	0	0	0	0	0	0	0	0	0	0	0	0	0	0.11	0	0	0	0	0	0.07
Pld1	0	0	0	0	0	0	0	0	0	0.74	0.46	0.26	0	0.05	0	0.33	0.8	0	0	0	0	0	0	0
Dennd5b	0.09	0.14	0	0	0	0	0.08	0	0	0	0	0	0	0	0	0	0.19	0.09	0	0	0	0	0	0
Ctnna3	0.01	0.2	0	0	0.07	0	0	0.22	0.25	0	0.19	0	0.18	0	0	0.16	0.08	0.21	0	0	0	0.07	0	0.19
Rxrg	0	0	0	0	0.04	0.29	0	0	0	0	0	0.81	0	0	0	0	0	0	0	0	0.54	0	0.78	0
Echdc2	0	0	0	0	0	0	0	0	0	0.92	0.96	0.52	0	0	0	0.58	0.15	0	0	0	0	0	0	0
Actb	0	0	0	0	0	0	0.16	0	0.12	0	0	0	0	0.11	0	0	0	0	0	0	0	0	0	0.03
Pcbp4	0.1	0.16	0	0	0	0	0	0	0	0	0	0	0	0	0	0	0.29	0	0	0	0	0	0	0
Ivd	0	0.11	0	0	0	0	0.27	0	0.01	0	0	0	0	0	0	0	0	0	0	0	0	0	0	0
Cyp4x1	0	0.32	0	0	0	0.03	0	0	0	0	0	0	0	0	0	0	0.09	0	0	0	0	0.04	0	0.15
Mcc	0.1	0	0	0.64	0.93	0.09	0	0	0	0	0	0	0	0	0	0	0.47	0	0	0	0	0	0	0
Pygb	0.06	0	0	0	0	0	0	0	0	0	0	0	0	0	0	0	0.04	0.11	0	0	0	0	0	0
Lmo3	0	0	0	0	0	0	0	0	0	0	0	0.93	0.29	0.72	0.43	0	0	0	0	0	0.45	0.36	0.1	0.55
Trpc6	0	0	0	0.69	0.48	0	0	0	0	0.62	0.05	0.4	0	0	0	0.27	0.11	0	0	0	0	0	0	0
Atxn7l1	0	0	0.09	0.02	0.16	0	0	0	0	0	0.08	0.07	0	0	0	0	0	0	0	0	0.05	0	0.05	0
Corin	0.06	0	0	0.95	0	0.07	0	0	0	0	0	0	0	0	0	0	0.17	0	0	0	0	0.89	0	0
Cdc42ep3	0	0	0	0	0	0	0	0	0	0	0	0	0	0	0	0	0	0	0	0	0	0	0.43	0
Gpr1	0.06	0.74	0.37	0.03	0	0.01	0	0	0	0	0	0	0	0	0	0	0	0.28	0	0	0	0	0	0
Pus7	0.07	0	0	0	0	0	0	0	0	0	0	0	0	0	0	0	0	0	0	0	0	0	0	0
Mei4	0.44	0.17	0	0	0	0.47	0.08	0	0	0	0	0	0	0	0	0	0.23	0.64	0	0	0	0	0	0
Clasp1	0.19	0	0.08	0	0.15	0.13	0	0	0	0.04	0.05	0	0	0	0	0	0.11	0	0	0	0	0	0	0
Btg1	0	0	0	0	0	0	0	0.64	0.32	0	0.01	0	0.01	0	0	0	0	0	0.04	0	0	0	0	0
AI593442	0.39	0.11	0	0	0.63	0.77	0	0	0	0	0	0	0	0	0	0	0.21	0	0	0	0	0	0	0
Nt5c2	0.12	0.1	0	0	0	0	0	0	0	0	0	0	0	0	0	0	0.12	0.01	0	0	0	0	0	0
Galntl6	0.23	0.09	0	0.24	0.56	0.46	0	0.07	0	0.16	0.14	0.13	0	0	0.2	0.11	0.24	0.21	0	0	0.28	0	0	0
Rasal2	0.39	0.1	0.09	0	0.06	0.15	0	0	0	0	0	0.12	0.1	0	0	0	0.18	0	0	0	0	0	0	0
Fam163b	0	0	0.03	0.42	0.2	0.22	0	0	0.1	0.03	0	0	0	0	0	0	0.41	0	0	0	0	0	0.15	0
Cdkl1	0.23	0.15	0	0	0	0.14	0	0	0	0	0	0	0	0	0	0	0.08	0	0	0	0	0	0	0
Slc26a11	0	0	0	0	0	0	0	0	0	0	0	0	0	0	0	0	0.07	0	0	0	0	0	0	0.26
Srgap1	0.57	0.58	0	0	0	0.09	0	0	0	0.28	0.08	0	0	0	0	0	0.36	0	0	0	0	0	0	0.07
Cacna1i	0	0	0	0	0.25	0.13	0	0	0	0	0	0	0	0	0.52	0	0	0	0	0.07	0.23	0	0	0
Zfp280d	0.1	0	0	0	0.04	0	0	0	0.15	0	0	0	0	0	0	0	0	0.15	0	0	0	0	0	0
Pkia	0.04	0.02	0	0	0	0	0	0.07	0.17	0	0.16	0	0	0	0	0	0.11	0	0	0	0	0	0	0
Rsph3a	0	0	0	0	0	0	0	0	0	0	0	0	0	0	0	0	0	0	0.5	0.63	0	0.12	0.47	0.22
Zdhhc14	0	0	0	0	0.06	0	0	0	0	0.77	0.46	0.59	0	0	0	0	0.24	0	0	0	0	0	0	0
Cfap45	0.02	0	0.02	0.18	0	0	0	0.03	0	0	0	0	0.24	0	0	0	0	0	0	0.22	0	0	0	0
Cdkl3	0	0.02	0	0	0	0	0	0	0.06	0.28	0	0.15	0.03	0	0	0	0.37	0	0	0	0	0	0	0
Klc2	0	0	0	0.05	0	0.06	0	0.05	0	0	0	0	0	0	0	0.15	0.15	0	0	0	0	0	0	0
Defb1	0.04	0	0	0	0	0	0	0	0	0	0	0	0	0	0	0	0	0	0.71	0	0.09	0.23	0	0.94
Kcnt1	0	0	0	0	0	0	0.01	0	0.19	0.09	0.18	0	0	0	0	0	0	0	0	0	0	0	0	0
Pkd1l2	0.38	0.23	0.03	0	0	0	0	0	0	0	0	0	0	0	0	0	0.17	0.93	0	0	0.22	0	0	0
Syt2	0	0	0.48	0	0	0	0	0	0	0	0	0	0	0	0.32	0	0	0.86	0	0.35	0.86	0	0	0
Stxbp6	0	0.47	0.74	0.19	0	0	0	0	0	0	0	0	0	0	0	0	0.08	0	0.78	0.8	0	0.54	0.74	0
Fbxo48	0	0	0	0	0.2	0	0	0	0.54	0	0.93	0.14	0	0	0	0	0.06	0.85	0	0	0	0	0	0
Ak5	0	0.07	0.18	0.08	0	0	0.05	0	0.18	0	0.11	0	0	0.18	0	0.07	0.04	0	0	0	0.03	0.07	0	0.07
Kcnt2	0.15	0	0	0.05	0.22	0.49	0	0.13	0.31	0	0.2	0	0	0	0	0.4	0.65	0.02	0	0	0	0	0	0
Ssbp2	0.03	0.07	0.18	0.2	0.13	0.08	0	0	0.06	0.13	0.17	0.25	0.11	0	0	0	0.11	0	0	0	0	0	0	0
Trp53i11	0	0	0	0.02	0	0	0	0.24	0	0	0	0	0	0.06	0	0.7	0.15	0	0	0	0	0	0.04	0
4933407I08Rik	0.11	0.16	0.85	0.83	0.04	0.1	0	0	0	0	0	0	0	0	0	0.44	0.33	0	0	0	0	0	0	0
Tsix	0.13	0	0.13	0	0.65	0	0	0.02	0	0	0	0	0	0	0	0	0	0	0	0	0	0	0	0
Sdk2	0.77	0.46	0	0	0	0.19	0.72	0	0	0.01	0	0.3	0	0	0	0	0.33	0.39	0	0	0	0	0	0
Runx2os1	0	0	0.88	0	0	0.04	0	0	0	0	0	0	0	0	0	0.33	0	0	0.02	0.31	0.66	0	0	0
Tmem215	0	0	0.13	0	0.81	0	0	0	0.12	0.23	0.19	0	0	0	0	0	0	0	0.13	0	0	0	0.24	0.45
Dzip1l	0	0.04	0.03	0	0	0.28	0	0	0	0	0	0	0	0	0	0	0.09	0.17	0	0	0	0	0	0
Shroom3	0.94	0	0.72	0	0	0	0.18	0	0	0	0.29	0.33	0	0	0	0	0.28	0	0	0	0	0	0	0
Ppp1r17	0	0.21	0	0	0	0	0.49	0	0	0	0	0	0	0.11	0.09	0	0.24	0	0.76	0	0	0	0	0.15
Myo9a	0.12	0.05	0.07	0.09	0	0	0	0	0	0	0.07	0	0	0	0	0	0.19	0	0.02	0	0	0	0	0
App	0.22	0.22	0.1	0	0	0	0.1	0.06	0	0	0	0	0	0.04	0.23	0	0.01	0	0	0	0	0.19	0.18	0
Mthfd1l	0	0	0	0	0	0	0	0.35	0.36	0	0.05	0.03	0	0.09	0	0	0.13	0	0	0	0	0	0	0
1500035N22Rik	0	0	0	0	0	0	0	0	0	0	0	0	0	0	0.07	0	0.13	0	0	0	0	0.4	0.04	0.75
Ivl	0	0.98	0	0	0	0	0	0	0	0	0	0	0	0	0	0	0	0	0	0	0	0	0	0
Myrip	0	0	0	0	0.08	0	0	0	0	0	0	0	0	0	0.01	0	0	0.09	0.28	0	0.34	0.1	0	0
Ssbp3	0.15	0.02	0	0	0	0.03	0	0	0	0	0	0.09	0	0	0	0	0	0	0	0	0	0	0	0
Pitpnm3	0	0	0	0	0	0	0	0	0	0	0	0	0	0	0	0	0	0.24	0.29	0	0	0.45	0.03	0
Greb1	0	0	0.27	0.84	0.96	0.5	0	0	0	0	0	0	0	0	0	0	0.59	0	0	0	0.05	0	0	0
Rftn1	0	0.69	0	0	0.01	0	0	0.11	0	0.02	0.2	0	0.47	0	0	0	0.19	0	0.33	0.4	0	0	0	0
Shisa9	0	0	0	0	0	0	0	0	0	0	0	0	0	0	0	0	0	0.31	0.25	0.13	0.39	0.23	0.48	0.27
Parp8	0.16	0.23	0	0.07	0	0	0	0	0	0	0	0	0	0	0	0	0.05	0	0	0	0	0	0	0
Slc9a5	0	0	0.19	0.03	0	0	0.25	0	0	0	0	0	0	0	0	0	0	0	0	0	0.05	0	0	0
Scmh1	0	0	0	0	0	0	0.03	0	0.08	0.18	0.06	0.15	0.14	0	0	0	0.18	0.05	0	0	0	0	0	0
Sys1	0.17	0.38	0	0.01	0	0.03	0	0.5	0	0.12	0.01	0.04	0	0	0	0	0.27	0	0	0	0	0	0	0
Lrmda	0	0.11	0	0.53	0.76	0.56	0	0	0	0	0	0	0	0	0	0	0.21	0	0	0	0	0	0	0
Gpx7	0	0	0	0.1	0.23	0	0	0	0	0.76	0	0	0	0	0	0	0.5	0	0	0	0	0	0	0
Sh3bp4	0.33	0	0	0.35	0	0	0.24	0	0.18	0.25	0	0	0	0.86	0.02	0	0	0.07	0	0	0	0	0	0
Atp11c	0	0	0	0	0	0	0.08	0	0	0.56	0	0	0	0.3	0	0	0.08	0	0	0	0	0	0	0
Mbnl2	0	0	0	0	0	0	0	0.19	0.22	0.26	0.2	0.14	0	0	0	0	0	0	0.15	0	0	0	0.1	0.08
Zdhhc1	0	0	0.06	0	0	0	0	0	0	0	0	0	0	0	0	0	0.03	0	0.04	0.01	0.09	0	0.05	0
Cacna1g	0.43	0.14	0.5	0.37	0.43	0.53	0	0	0.04	0	0	0	0	0	0	0	0	0.24	0	0	0	0	0	0
Anxa6	0.08	0	0.3	0	0.41	0.06	0	0	0	0.15	0	0	0	0	0	0	0.16	0	0	0	0	0	0	0
Ubxn11	0	0	0	0	0	0	0	0	0	0	0	0	0	0	0	0	0	0	0.1	0.09	0	0	0	0.06
Col26a1	0	0	0.39	0.01	0	0	0.06	0	0	0	0	0	0	0	0	0	0.05	0	0.82	0.63	0	0.69	0	0
Wfs1	0	0	0	0	0	0	0	0	0	0	0	0.02	0	0.21	0	0	0.11	0	0	0	0	0.67	0	0
B3galt5	0	0	0	0	0	0	0	0	0	0	0	0.01	0	0	0	0	0.14	0	0	0	0	0	0.15	0
Luzp2	0.51	0	0.26	0	0	0.06	0.39	0.19	0.12	0.04	0.2	0	0.39	0	0.35	0.23	0	0	0	0.27	0	0.24	0	0
Msra	0	0	0	0	0	0	0.69	0.18	0	0	0	0	0	0.74	0	0	0.02	0.39	0	0	0	0	0	0
Glra2	0.3	0	0.08	0.48	0.7	0.47	0	0	0	0.11	0	0	0	0	0	0	0.53	0.03	0	0	0	0	0	0
Dach1	0	0	0	0	0	0	0.92	0.18	0.96	0.09	0	0	0	0	0	0	0.09	0	0.06	0	0	0	0	0
1700112D23Rik	0	0	0.13	0.73	0.25	0.03	0	0	0	0	0.08	0	0	0	0	0.29	0	0	0	0	0	0	0	0
Col15a1	0	0.21	0.96	0.16	0.85	0.47	0	0	0	0	0	0	0	0	0	0	0.38	0	0	0	0.28	0	0	0
Prkar2b	0	0	0	0	0	0	0	0	0	0	0	0	0	0	0	0	0	0.03	0.69	0.43	0	0	0	0
Tmtc1	0	0	0.02	0	0.17	0	0	0	0	0	0	0	0	0	0	0	0	0	0.09	0	0.21	0.1	0	0
Nos1ap	0.07	0	0	0	0	0	0.2	0	0	0	0	0	0	0	0.05	0	0	0	0	0.5	0.06	0.08	0	0
A330084C13Rik	0	0	0.31	0.76	0.51	0.84	0	0	0	0	0	0	0.14	0.01	0.35	0	0	0	0	0	0	0	0	0
Slc1a1	0	0	0	0	0	0	0	0	0	0	0	0	0	0	0	0.08	0	0.03	0.03	0	0	0	0	0
Adgre5	0	0	0	0	0	0.23	0	0.12	0	0.72	0.88	0.34	0	0	0	0	0.02	0	0.11	0	0	0	0	0
Ldb2	0	0	0	0	0	0	0.15	0.52	0.15	0	0.12	0.11	0	0.26	0	0	0	0.23	0.31	0.19	0	0.4	0.36	0.08
Chst8	0	0	0	0	0	0	0	0.17	0	0.47	0.09	0.11	0.18	0.25	0.12	0	0	0.2	0	0	0.43	0	0	0.4
Prkcg	0.4	0.09	0.41	0.28	0.4	0.36	0	0	0	0	0	0.02	0	0	0	0	0	0.1	0	0	0	0	0	0
Cpne8	0	0.4	0.29	0.24	0.38	0.57	0	0	0	0	0.39	0	0	0	0.47	0	0	0	0	0	0	0.34	0.5	0
Scube1	0.59	0.52	0.43	0.09	0.92	0	0	0	0	0	0	0	0	0	0	0	0.27	0.43	0	0	0	0	0	0
Nkain3	0.62	0.15	0.49	0.43	0.81	0.22	0	0	0	0.03	0	0.09	0	0	0.6	0	0.17	0	0	0	0	0	0	0
Arglu1	0	0.01	0.1	0.14	0	0.08	0	0	0	0	0.06	0	0	0	0	0	0	0.17	0	0	0	0	0.04	0
Ahnak	0.84	0.32	0.63	0	0	0	0	0	0	0	0	0	0	0	0.33	0	0.19	0	0	0.24	0	0	0	0
Pnma3	0.17	0	0.03	0.02	0.08	0.09	0	0	0	0	0	0	0.05	0	0.01	0	0.18	0	0	0	0	0	0	0
Cerkl	0	0.35	0.71	0	0	0	0	0	0	0	0	0	0	0	0.56	0	0	0	0	0.94	0	0.46	0	0
Kcnq4	0.52	0.66	0	0	0	0	0	0	0	0.54	0.14	0	0	0	0	0	0.52	0.46	0	0	0	0	0	0
Igsf8	0	0	0	0	0	0	0	0	0.02	0	0	0	0	0.02	0.11	0	0.08	0	0	0	0	0	0	0
Dlk1	0.96	0.87	0	0	0	0	0	0	0	0	0	0	0.1	0	0	0	0.63	0	0	0.22	0	0	0	0
Tepp	0.35	0.9	0	0	0	0	0	0	0	0	0.05	0	0	0	0	0	0.6	0	0.78	0.05	0	0	0	0
Scube2	0.94	0.62	0	0	0	0	0	0	0.78	0.27	0.03	0.09	0	0	0	0	0.19	0	0	0	0	0	0	0
Col6a6	0	0.77	0	0	0	0	0	0	0.98	0.02	0	0	0	0	0	0	0.07	0	0	0	0	0	0	0
Crispld1	0	0	0	0	0	0	0.03	0.24	0.13	0.25	0.95	0	0.09	0	0	0	0.36	0	0	0	0	0.35	0	0
Itpkb	0	0	0	0	0	0	0	0	0	0.44	0	0	0	0	0	0	0.13	0.05	0	0	0	0	0	0
Slc50a1	0.21	0.12	0	0	0	0	0	0	0	0	0.04	0	0	0	0	0.11	0.27	0.06	0	0	0	0	0	0
Fermt1	0	0	0	0	0	0	0	0	0	0.57	0	0	0.38	0	0	0	0	0	0.84	0	0	0.33	0	0.4
Arrdc1	0	0	0	0	0	0	0	0	0	0	0	0	0	0	0	0.18	0.08	0.21	0	0	0	0	0.14	0
Ttc3	0.19	0.19	0.15	0	0.05	0	0.22	0.2	0.09	0.15	0.08	0.06	0.12	0.1	0.18	0	0.13	0	0.17	0	0	0	0.21	0.05
Nf1	0.09	0.01	0	0	0.12	0.01	0.02	0.03	0	0	0	0	0	0	0	0	0.22	0	0	0.02	0	0	0	0
Susd1	0	0	0	0	0	0	0.25	0	0	0	0	0.83	0	0	0	0	0	0	0	0	0	0.54	0	0
Epsti1	0	0	0	0	0	0	0	0	0	0	0	0	0	0.65	0.73	0	0	0.73	0.8	0	0	0.94	0.47	0
Dock9	0.1	0	0	0	0	0	0	0	0	0	0	0	0	0	0.11	0	0	0.14	0	0	0	0	0.06	0.02
Etv1	0	0	0	0.01	0	0	0	0.01	0	0.86	0	0.99	0	0	0.07	0	0.28	0	0	0	0	0	0	0
Pcsk2os1	0	0	0.2	0	0.19	0	0	0	0.08	0	0	0	0	0	0	0	0	0	0	0	0.2	0	0	0
Map2k4	0.15	0.14	0.11	0	0.14	0	0	0	0	0	0	0	0.1	0	0	0	0	0	0	0	0	0	0	0
Sema5b	0	0	0	0.41	0.38	0.03	0	0	0	0.12	0	0	0	0	0	0	0.17	0.71	0	0	0	0	0.06	0.51
Tcerg1l	0	0	0	0	0	0	0.5	0	0	0	0	0	0	0	0	0	0	0	0	0	0	0	0.84	0
Daglb	0	0	0	0	0	0	0.01	0	0	0	0	0	0	0	0	0	0.09	0	0.04	0.01	0	0	0	0.02
Dennd6b	0	0	0	0	0	0	0	0	0	0	0	0	0.03	0	0	0.02	0.13	0.02	0	0	0	0.03	0	0.02
Usp25	0	0.06	0.06	0	0	0.25	0	0	0	0	0	0.11	0.19	0.17	0.28	0	0.11	0.11	0	0	0	0	0	0
Enox2	0.48	0	0	0.1	0.13	0	0.39	0	0.19	0	0	0	0	0	0	0	0.48	0	0	0	0	0	0	0
Flrt3	0	0	0	0	0	0	0	0	0	0	0	0	0	0	0	0	0.27	0.18	0	0	0	0	0	0
Gsdme	0	0	0	0	0	0	0.39	0	0	0	0	0	0	0	0	0.17	0.28	0.07	0	0.25	0	0.09	0	0
Amigo2	0	0	0	0	0	0	0	0	0	0	0	0	0	0	0	0	0	0.45	0.76	0.29	0	0.14	0.74	0.34
Casz1	0	0	0	0	0	0	0	0	0	0	0	0	0	0	0	0.54	0	0	0.12	0	0	0	0	0
Gabra2	0.34	0.06	0.17	0.13	0.23	0	0	0	0	0	0	0.07	0	0.14	0.19	0	0	0	0.12	0	0.19	0.05	0	0
BC005561	0.14	0.02	0.05	0.05	0.14	0	0	0	0	0	0	0	0	0	0	0.05	0.16	0	0	0	0	0	0	0
Cpq	0	0	0	0	0	0	0	0	0	0	0	0	0	0	0	0	0.56	0	0	0	0	0	0	0
1700010I14Rik	0.24	0	0	0.03	0	0.23	0	0	0	0.2	0	0	0	0	0	0	0.05	0	0	0	0.22	0	0.06	0
Ptpra	0	0	0	0	0	0	0.06	0	0.13	0	0	0	0	0	0	0	0	0	0.03	0.04	0	0	0	0
Mkx	0.25	0.2	0	0	0	0	0.38	0.15	0.08	0	0	0	0	0	0	0	0	0	0.02	0	0	0.51	0.31	0.79
Grk3	0	0	0	0.01	0	0	0	0	0	0	0	0	0	0	0	0.12	0	0.07	0.03	0	0	0.08	0	0.04
Abhd14b	0.08	0.01	0	0	0	0.01	0	0	0	0	0	0	0	0	0	0.1	0.1	0	0	0	0	0	0	0
Acsl1	0	0	0	0	0	0	0	0	0	0	0	0	0	0.06	0	0	0	0	0	0	0	0.1	0	0
Rnf165	0	0	0	0	0	0	0	0	0	0	0	0.56	0	0	0	0	0	0	0	0	0	0	0	0
Nckap5	0.16	0.56	0	0	0	0	0	0.34	0	0	0.21	0	0.27	0.25	0.1	0	0.19	0	0	0	0	0	0.02	0
Cyld	0	0	0.11	0	0.04	0	0	0	0	0.06	0	0	0	0	0	0	0	0	0	0	0	0.11	0	0
Dgkb	0.09	0	0	0	0	0.14	0	0	0	0.22	0	0.16	0	0.02	0	0	0	0.24	0.21	0.23	0.14	0.2	0.1	0.22
Tacc1	0	0	0	0	0	0	0	0	0	0	0	0	0	0	0	0	0.11	0.08	0.34	0	0	0	0	0
Fam171b	0.17	0.01	0.25	0	0	0	0	0	0.04	0	0	0	0	0	0	0	0	0	0	0	0	0	0	0
Lancl1	0	0	0	0	0	0	0	0	0	0	0	0	0.02	0	0	0	0.04	0	0	0	0	0	0	0.05
Tle2	0	0	0.42	0.37	0.33	0	0	0	0	0	0	0	0	0	0	0	0	0.06	0	0	0.14	0	0	0.05
Tyro3	0	0	0	0	0	0	0.69	0.2	0	0	0	0.09	0	0	0.21	0.05	0.16	0	0	0	0	0	0	0
Scd2	0.04	0	0	0	0	0	0.1	0	0	0	0	0	0	0	0.02	0	0	0	0	0	0	0	0	0
Klhl24	0	0.07	0	0	0	0	0	0	0	0	0	0	0.05	0.11	0.12	0	0.19	0	0	0	0	0	0	0
Nrgn	0	0	0.65	0.07	0.54	0.23	0	0	0	0	0	0.44	0	0	0.51	0	0	0	0	0	0.84	0	0	0
Cadm3	0	0	0.09	0.06	0	0	0	0	0	0.08	0.08	0	0	0	0	0	0	0.15	0	0	0	0	0	0.01
5530401A14Rik	0	0	0	0	0	0	0.21	0	0	0.54	0.2	0.45	0	0	0	0	0	0	0	0	0	0	0.02	0
P4ha3	0.38	0	0.2	0	0	0	0	0	0	0	0	0	0	0	0	0	0	0	0	0	0.85	0	0.12	0
Glt8d2	0	0.94	0	0	0	0	0	0	0.27	0.9	0	0	0	0	0	0	0	0	0	0	0	0	0	0
Tcf4	0	0	0	0	0	0	0.94	0.81	0.71	0	0.12	0	0	0	0	0	0.19	0	0	0.37	0	0	0	0
4933406F09Rik	0	0	0	0	0	0	0.7	0	0	0	0	0	0.16	0	0	0	0	0.25	0	0.2	0	0	0	0
4932435O22Rik	0	0	0.04	0	0	0	0	0.2	0.52	0.89	0	0	0	0	0	0	0.58	0	0	0	0	0.36	0.73	0
Fcho1	0	0	0	0	0	0	0	0	0	0	0	0	0	0	0	0	0.17	0	0	0	0	0	0	0.08
Arhgef28	0	0	0	0	0	0	0.05	0	0	0	0	0.05	0	0.07	0	0	0.11	0.01	0	0.53	0	0.19	0	0
Astn1	0.18	0.14	0.03	0	0.06	0	0	0	0	0.11	0	0.09	0	0	0	0	0.02	0	0	0	0	0	0	0
Rnf19a	0	0	0	0	0.45	0	0	0	0	0	0	0	0	0	0	0	0	0	0	0	0	0	0	0
Gpc3	0	0	0.04	0	0.97	0	0	0	0	0	0	0	0	0	0	0	0.78	0	0.42	0	0	0.92	0.02	0
Dgkh	0.13	0	0	0	0.11	0	0	0	0	0	0	0.08	0.15	0	0.16	0	0	0	0	0.03	0	0.11	0	0.08
Shroom4	0	0	0.78	0.22	0.23	0	0	0	0	0	0	0	0	0	0	0.01	0.2	0	0.22	0.28	0	0	0	0
1110015O18Rik	0	0	0	0.26	0	0.36	0	0	0	0	0	0	0	0	0	0.09	0.06	0.73	0.62	0.35	0	0.28	0.44	0.28
Stxbp5l	0.18	0.11	0.18	0	0.19	0.05	0	0	0	0.01	0.09	0.04	0	0	0	0	0.02	0	0	0	0.01	0	0.04	0
Trim2	0.15	0.08	0	0.01	0.03	0	0	0	0	0	0.02	0	0	0	0	0	0.12	0	0	0	0.01	0	0.03	0
Tanc2	0.13	0.17	0.17	0.12	0.21	0	0	0	0	0	0	0	0	0	0.17	0	0.09	0	0.14	0	0.13	0	0.17	0
Mdga2	0	0	0	0.18	0	0.23	0.1	0	0	0.19	0.19	0.22	0	0	0	0.22	0.21	0.15	0.06	0	0.21	0	0.19	0.22
Far2os1	0.74	0	0	0	0.44	0	0	0	0	0	0	0	0	0	0	0	0.49	0	0	0	0	0.09	0	0
Trim17	0	0	0	0	0	0	0	0	0	0	0	0	0	0.05	0	0	0.09	0	0	0	0	0	0.16	0.77
Klhl14	0	0	0.89	0.94	0	0.33	0.01	0	0.73	0	0	0	0	0	0	0	0	0	0	0	0	0	0.13	0
Susd4	0	0.09	0	0	0	0	0	0	0	0	0	0	0	0.23	0	0	0	0	0.06	0.01	0.19	0.1	0.11	0.17
Lingo1	0	0.02	0.17	0	0	0	0	0	0	0	0	0.13	0	0	0	0	0	0	0	0	0	0	0	0
Slc38a11	0	0	0	0	0	0	0	0	0	0	0	0	0	0.36	0	0.34	0.5	0.98	0.05	0	0	0	0	0.14
Slc22a23	0	0	0	0	0	0	0	0	0	0	0	0	0	0	0	0	0	0.14	0	0	0.07	0.09	0.01	0
Pkp4	0	0	0	0.28	0.24	0	0	0	0	0	0	0.35	0	0	0	0	0.2	0	0.16	0	0	0	0.01	0
Dalrd3	0	0	0	0	0	0	0	0	0	0	0	0	0	0	0	0	0	0	0.08	0	0	0.07	0	0
Spag5	0.02	0	0.06	0.04	0.16	0	0	0	0	0	0	0.1	0	0	0	0	0.26	0	0	0	0	0	0	0.16
Tmem44	0.13	0.36	0.43	0.64	0.37	0.73	0	0	0.15	0	0	0	0.1	0	0	0	0.21	0	0	0	0	0	0	0
Cxxc4	0	0	0	0	0	0	0	0	0	0	0.11	0	0	0	0.05	0	0	0.12	0	0	0	0	0	0
Rspo1	0.16	0.86	0.43	0	0.11	0	0	0	0	0	0	0	0.02	0	0.14	0	0.29	0	0	0.78	0	0	0.27	0
Col6a3	0.14	0	0	0.49	0	0	0.58	0.13	0.05	0	0	0	0	0	0	0	0	0	0.44	0.16	0	0	0	0
Serpina12	0	0	0.91	0.95	0	0	0	0	0	0	0	0	0	0	0	0	0.45	0	0	0	0	0	0	0
C1galt1	0	0	0.01	0	0	0.08	0.06	0.27	0	0	0	0.01	0	0	0	0	0	0	0	0	0.04	0	0	0
Psap	0	0	0	0	0	0	0.14	0.08	0.16	0	0	0	0	0.13	0.07	0	0.16	0	0	0	0	0	0	0.14
Cygb	0	0	0	0	0	0	0	0	0.23	0	0.22	0.42	0	0	0	0	0.13	0.47	0	0	0	0	0	0
Glipr1	0	0	0.07	0.28	0.04	0	0	0	0	0	0	0	0	0	0	0	0.07	0	0	0.85	0.15	0	0.93	0.16
Glipr2	0	0	0	0	0	0	0	0	0	0	0	0	0	0	0.5	0	0	0	0.86	0.92	0	0.27	0	0.16
Dchs2	0	0	0	0	0	0	0	0	0.34	0.65	0	0.71	0	0	0	0	0	0	0	0	0	0	0	0
Asxl3	0.51	0.23	0	0	0.07	0	0	0	0	0.74	0.67	0	0	0	0	0.01	0.08	0	0	0	0	0	0	0
Cngb1	0	0	0	0	0	0	0	0	0	0	0	0	0.55	0	0	0	0.67	0	0.69	0.37	0	0	0	0.41
Thsd7a	0	0.07	0	0	0	0	0.59	0	0	0.17	0.09	0.5	0	0	0	0	0.63	0	0	0.08	0	0	0	0
Setx	0	0	0	0	0	0	0	0	0	0.06	0.14	0.13	0	0	0	0	0.19	0	0	0	0	0	0	0
Myrfl	0	0	0.77	0	0	0.9	0	0	0	0	0.1	0	0	0	0.28	0	0	0	0	0	0.31	0.51	0	0
Nup35	0.15	0	0.37	0.04	0.33	0.32	0	0	0	0	0	0	0	0	0	0	0.06	0	0	0	0	0	0	0
5031425E22Rik	0.15	0	0	0	0.04	0	0	0	0	0	0	0	0	0	0	0	0	0	0	0	0	0	0	0
Clstn2	0	0	0	0	0	0	0.53	0.31	0.28	0.46	0.41	0.14	0.17	0.05	0	0.09	0.14	0.33	0	0	0	0	0	0.2
Stk26	0	0	0.33	0	0.66	0.2	0	0	0	0	0	0.17	0	0	0.93	0	0.15	0	0.12	0.03	0.59	0	0	0
Cpne9	0.84	0.47	0.31	0.65	0.02	0.19	0	0	0	0	0	0	0	0	0	0	0.18	0	0	0	0	0	0	0
Amy1	0	0	0	0	0	0	0.08	0	0.08	0	0	0	0	0	0	0	0.21	0.01	0	0	0	0	0	0
Kcnc1	0.08	0	0	0	0	0	0	0	0	0	0	0	0	0	0	0	0.11	0.17	0	0	0	0	0	0
Npm2	0	0	0	0	0	0	0	0	0	0	0	0	0.3	0	0	0	0.08	0.12	0.66	0.41	0	0.2	0.48	0.11
Grin1	0.1	0	0.05	0	0	0.13	0	0	0	0	0	0	0	0	0.04	0	0.1	0	0.07	0.16	0.14	0	0.12	0.14
Fat4	0	0	0.69	0	0.7	0.48	0.17	0.75	0	0	0	0	0	0	0.57	0	0.15	0	0	0	0.08	0	0	0
Kdr	0.4	0	0.01	0.72	0	0.12	0	0.94	0.31	0.3	0	0.12	0	0.71	0	0	0	0	0	0	0	0	0	0
Phactr3	0.16	0	0.04	0.07	0.05	0.1	0	0	0	0	0	0	0.15	0.07	0	0	0.01	0	0	0	0	0	0	0
Car11	0	0	0	0	0	0	0	0	0	0	0	0	0	0	0	0	0.02	0	0	0.19	0	0.04	0	0.51
Ppargc1b	0	0	0	0	0	0.11	0	0	0	0	0.08	0	0	0	0	0	0	0.06	0	0	0.05	0	0	0
Coch	0	0	0.1	0.63	0.86	0.15	0	0	0	0	0	0	0	0	0	0	0.02	0	0	0.11	0	0	0.08	0
Vwa5b2	0.17	0.14	0.07	0	0	0.11	0	0	0	0	0	0	0	0	0.12	0.01	0.04	0	0	0	0.11	0	0	0.18
Kif23	0	0	0	0	0	0	0	0.31	0	0.78	0.18	0.15	0	0	0	0.03	0.18	0	0	0	0.1	0	0	0.09
Limch1	0	0	0	0.09	0.01	0	0.13	0	0	0	0	0	0	0.07	0	0	0	0.05	0	0	0	0	0.17	0
Unc13b	0.03	0	0.13	0	0	0	0	0	0	0	0	0	0.01	0	0	0	0.22	0.05	0	0	0	0	0	0
Pgr	0	0	0	0.75	0.72	0.15	0	0.23	0	0	0	0.26	0	0	0	0	0.3	0	0	0	0	0	0	0
Olfr558	0	0	0.96	0	0	0	0	0	0	0	0	0	0	0	0	0	0	0	0.62	0	0	0	0	0
Fam126a	0	0	0	0	0	0	0	0	0	0	0	0	0.01	0.66	0.05	0	0	0.38	0.18	0	0.36	0	0.03	0.35
Kcnab1	0	0	0	0	0	0	0	0	0	0	0	0	0	0	0.02	0	0.02	0.48	0.75	0	0.05	0	0	0.11
Pcgf5	0	0	0.1	0.14	0.06	0.08	0	0	0.07	0	0	0	0	0	0	0	0.29	0	0	0	0	0	0	0
Tial1	0.02	0.15	0	0	0	0	0	0	0	0.06	0.05	0.1	0	0	0	0	0.09	0	0	0	0	0	0	0
Srrm4	0.1	0.16	0.17	0.21	0.37	0	0	0	0	0	0	0	0	0	0	0	0	0	0.22	0.04	0	0	0	0
Camk1d	0	0	0.21	0.19	0.15	0.18	0	0.07	0	0	0.09	0	0	0	0.09	0	0	0	0	0	0	0	0	0
Dnah7b	0	0	0	0	0	0	0	0.02	0	0	0	0	0.11	0.2	0	0	0.08	0.02	0.12	0.08	0.19	0.32	0.32	0.5
9330182L06Rik	0.03	0.13	0	0	0	0	0	0	0	0.35	0	0	0	0	0	0	0.01	0.07	0	0	0	0	0	0
Pcdh15	0	0	0	0	0	0.22	0	0	0	0.2	0	0.02	0	0	0.22	0	0.09	0	0.25	0.2	0	0.23	0.2	0.22
Slc35b3	0	0	0	0	0	0	0	0	0	0	0	0	0	0	0	0	0.15	0	0.45	0	0	0	0.12	0.29
Map2k6	0	0	0	0	0	0	0.39	0	0.33	0.1	0	0.01	0	0	0	0	0	0	0	0	0	0	0	0
Stk39	0	0	0	0	0	0	0	0	0	0	0	0	0	0	0	0	0.01	0.16	0.12	0	0	0	0	0.02
Txndc15	0	0	0	0	0	0	0.05	0.02	0.08	0	0	0	0	0	0	0	0.23	0	0	0	0	0	0	0
Nt5dc3	0	0	0	0	0	0	0.2	0	0	0	0.44	0.27	0	0	0	0.19	0.05	0.27	0	0	0	0	0	0
Capn2	0	0.03	0	0	0	0.08	0	0	0	0	0	0	0	0	0	0.21	0.24	0.05	0	0	0	0	0	0
Klhl5	0	0	0	0	0	0	0.02	0	0	0.07	0.18	0.42	0.14	0.35	0	0	0	0.52	0.25	0.04	0	0.13	0	0.04
Tspear	0	0.49	0	0	0.5	0.48	0	0	0	0	0	0	0	0	0.03	0	0.23	0	0	0	0	0	0	0.29
Arhgef40	0.23	0.2	0	0	0	0	0	0	0	0	0	0	0	0	0	0	0.04	0	0	0	0	0	0	0
Ipo11	0	0	0	0	0	0	0	0	0	0	0	0	0	0	0	0	0.16	0	0	0	0	0	0.01	0
Ankrd34b	0	0	0	0	0	0	0	0	0	0	0	0.08	0	0.06	0	0	0	0.03	0.59	0.37	0.4	0.6	0.2	0.88
Lurap1	0.2	0	0	0.04	0	0	0	0	0.02	0	0.28	0	0	0.13	0	0.21	0.47	0	0	0	0	0	0	0
Atp7a	0	0	0	0	0.17	0	0.06	0	0	0	0	0	0	0	0	0	0.18	0	0.34	0	0	0	0	0
Kank4	0	0	0	0	0	0.07	0.97	0	0	0	0.07	0	0	0	0	0	0.09	0	0	0	0	0	0	0
Dynll1	0	0	0	0	0	0	0	0	0	0	0	0	0.03	0	0	0	0	0	0	0	0.01	0	0	0.14
Dip2c	0.22	0.02	0	0	0.19	0	0	0	0	0	0	0	0	0	0.11	0	0	0.06	0	0	0.11	0	0	0
Pkp2	0.01	0	0	0	0	0	0	0	0	0.03	0	0.32	0	0	0.39	0	0	0	0.21	0	0.38	0.34	0	0
Gsg1l	0	0.31	0	0	0	0	0.83	0	0.22	0	0	0	0	0	0	0	0.1	0	0	0.01	0	0	0	0
Myt1l	0	0	0.11	0	0.12	0	0	0	0	0	0.12	0.23	0	0	0	0	0.06	0	0	0	0.21	0	0.16	0.18
Cd274	0	0.11	0	0.19	0	0	0	0.54	0	0	0.82	0	0	0	0	0.08	0.18	0	0.62	0.34	0	0	0	0
Necab1	0	0	0.86	0.98	0.08	0.6	0	0	0	0	0	0.01	0	0	0	0	0.44	0	0	0	0	0	0	0
Tgfb2	0	0.44	0.07	0	0	0	0.05	0	0	0	0	0	0	0	0	0	0.11	0	0	0	0.05	0	0.55	0
Stn1	0	0	0.6	0.54	0.44	0.2	0	0	0	0	0	0	0	0	0	0	0.06	0	0	0	0	0	0	0
Ralgapa2	0	0	0	0.16	0	0	0	0	0	0.09	0	0	0	0	0	0	0	0	0.13	0	0	0.19	0.29	0
Maged1	0	0	0	0	0	0	0.04	0	0	0	0	0	0	0.04	0	0	0	0	0	0	0	0	0	0.17
Cep85l	0	0	0	0	0	0	0	0	0.4	0.68	0.29	0.04	0	0	0	0.12	0	0	0	0	0	0	0	0
Chd6	0.06	0.11	0.1	0	0	0.02	0	0	0	0	0	0	0	0	0.01	0	0	0.08	0	0	0.14	0	0	0
Hlf	0	0	0	0	0	0	0.02	0	0.84	0	0	0	0	0	0.66	0	0.26	0	0	0	0	0	0	0.02
Ptpn4	0	0	0	0	0.25	0	0	0	0	0.07	0	0.07	0	0	0	0	0	0	0	0	0	0	0	0
Uchl1os	0	0	0	0	0.16	0	0	0	0	0	0	0	0	0	0	0	0.22	0	0.41	0.18	0	0	0	0.01
C1ql2	0	0	0	0	0	0	0.63	0	0	0	0	0	0.9	0.75	0	0.77	0	0	0.05	0	0	0.61	0	0
Ppm1l	0	0	0	0	0	0	0.7	0.21	0	0	0	0	0	0.14	0	0	0	0	0.04	0.38	0	0.39	0	0
Pld6	0.34	0	0	0.13	0	0	0.02	0	0.29	0.28	0	0	0.45	0	0	0.1	0.37	0	0	0	0	0	0	0
Ptprr	0	0	0	0	0	0	0	0	0	0.27	0	0.06	0	0	0	0	0	0	0	0	0.13	0.08	0.3	0.06
Mrpl4	0	0	0	0	0	0	0	0	0	0	0.19	0	0	0	0	0	0.29	0	0	0	0	0	0	0
Sorbs1	0	0	0	0	0.04	0	0	0	0	0	0.15	0	0	0	0	0	0.07	0	0.08	0.12	0.08	0	0.18	0.13
Smoc1	0	0.33	0	0	0	0	0.8	0.21	0.68	0	0	0	0	0	0	0	0.27	0	0.14	0	0	0	0	0
Cacna2d1	0	0	0	0	0	0	0.24	0.22	0.23	0.24	0.22	0.21	0.17	0.24	0.06	0	0	0	0.24	0.24	0.12	0.24	0.21	0
Kbtbd11	0	0	0	0	0	0	0	0	0	0.31	0.16	0	0	0.04	0	0	0	0	0	0.02	0	0	0	0
Arhgap22	0	0	0	0	0	0	0	0	0	0	0	0.1	0	0	0	0	0.06	0.33	0.87	0.69	0	0	0.13	0.4
Tmem178b	0	0	0.04	0.07	0.13	0	0	0	0	0	0	0	0	0	0	0	0	0.12	0.2	0.17	0	0.13	0.2	0
Traf3	0	0.12	0	0	0	0	0	0	0	0	0	0	0.02	0	0	0	0	0	0	0	0	0	0.06	0
P3h4	0	0	0	0	0	0	0.38	0.13	0.28	0	0	0	0	0	0	0	0.34	0	0	0	0	0	0	0
Birc2	0	0	0.04	0.02	0	0	0	0.01	0.07	0	0	0	0	0	0	0	0	0	0	0	0	0	0	0
Igf1	0.06	0.85	0	0	0.01	0	0	0	0	0.43	0	0.92	0	0.98	0	0	0.35	0	0	0	0	0	0	0
Galr1	0	0	0	0	0	0	0	0.64	0.42	0.24	0.89	0	0	0	0	0	0.16	0	0	0.02	0	0.77	0.6	0
Tdrd7	0.02	0	0	0	0.45	0	0	0	0	0	0	0	0	0	0	0	0.14	0	0	0	0	0	0	0
Tenm4	0	0	0	0	0	0	0	0	0	0	0	0	0.14	0.01	0.2	0	0	0.11	0.28	0.32	0.12	0.23	0.06	0.07
Prdx6	0	0	0	0	0	0	0	0	0	0	0	0	0	0	0	0	0	0	0.28	0	0	0	0	0
Shc3	0	0	0	0	0	0.11	0	0	0	0	0	0	0.28	0.36	0.24	0.06	0.02	0	0	0	0	0	0	0
4930555F03Rik	0	0	0	0	0	0.23	0.42	0.08	0.15	0	0	0	0	0.66	0	0.2	0.21	0	0.14	0.77	0	0.22	0	0
Rcn2	0	0	0	0	0	0	0.08	0.07	0.18	0	0	0	0	0	0	0	0.04	0	0	0	0	0	0	0
Catsperg1	0	0.64	0.26	0.44	0	0	0	0	0	0.01	0	0	0.01	0	0	0	0.15	0	0.07	0	0	0	0	0
Aldh1a2	0.02	0	0	0	0	0	0	0	0	0.94	0.85	0	0	0	0	0	0.29	0	0	0.05	0	0	0	0
Pla2g4f	0	0	0.62	0.96	0.93	0	0	0	0	0	0	0	0	0.06	0	0	0.13	0	0	0	0	0	0	0
Maml2	0.48	0	0	0.1	0.48	0	0	0	0	0.36	0	0.36	0	0	0	0.03	0.25	0	0	0	0	0.09	0.47	0
Shtn1	0.12	0	0	0	0	0	0.16	0.19	0.24	0	0.12	0	0.04	0	0	0	0	0.33	0	0	0	0	0	0
Nptx1	0	0	0	0	0	0.07	0	0	0	0	0	0	0.03	0	0.37	0	0	0.58	0	0	0.79	0	0	0
Chst9	0	0	0	0.58	0.94	0.72	0	0	0.78	0	0	0	0	0	0	0	0.08	0	0	0	0	0	0	0
Nr4a1	0	0	0	0.35	0	0.04	0	0	0	0.09	0.26	0	0.72	0	0.01	0	0.11	0	0	0	0	0	0	0
Srgap2	0.08	0.05	0.06	0	0	0.15	0.01	0	0	0	0	0	0	0	0	0	0.06	0	0	0	0	0	0	0
Ankrd55	0.06	0	0	0	0	0	0	0	0	0.24	0.16	0.09	0.2	0.11	0.04	0.16	0	0	0	0	0	0.06	0	0
Icam5	0	0	0	0	0.07	0	0	0	0	0.05	0	0	0	0	0.3	0	0.11	0	0.04	0.02	0	0.29	0	0
Celf5	0	0	0	0	0.05	0	0	0	0	0	0	0	0	0	0	0	0	0	0.07	0	0.07	0	0	0
Mok	0	0	0	0	0	0	0	0	0	0.05	0	0	0.01	0	0	0	0.18	0	0.02	0.09	0	0	0	0
Apcdd1	0	0	0	0	0	0	0	0	0	0.84	0	0.26	0.04	0.77	0.65	0	0	0	0	0	0	0	0	0
Alcam	0.49	0.25	0.44	0.35	0.36	0.19	0	0	0	0.14	0.3	0.16	0.09	0.07	0.54	0	0	0	0	0	0	0.19	0	0
Sh3pxd2a	0	0	0.28	0.3	0	0.05	0	0	0.24	0.07	0.03	0.02	0	0	0	0	0.29	0	0	0	0	0	0.01	0
Grm8	0	0.35	0.49	0.45	0.21	0.38	0.13	0	0	0	0	0	0	0.3	0.19	0	0.1	0	0.14	0	0.2	0.39	0	0
Rerg	0	0	0	0	0	0	0.18	0	0	0	0	0	0	0.18	0	0.08	0	0	0.25	0.18	0	0.26	0	0
Epb41l2	0.24	0.74	0.55	0.15	0	0	0	0	0	0	0	0	0.12	0	0	0	0	0	0	0	0	0	0	0
4930590L20Rik	0	0	0	0	0	0.06	0	0.22	0.33	0	0	0	0	0	0	0.59	0.67	0	0	0	0	0	0	0
Nos1	0	0	0.74	0.67	0.89	0.77	0	0	0	0	0	0	0	0	0	0	0.15	0	0	0	0	0	0	0
1700024B18Rik	0.27	0.27	0.24	0	0.24	0	0	0	0	0	0	0	0	0	0	0	0.35	0	0	0	0	0	0	0
Atp2b1	0	0	0.01	0	0.25	0.09	0.15	0	0	0.18	0.19	0	0	0	0	0	0.21	0	0	0.04	0	0	0	0
Cyp7b1	0	0	0	0	0	0	0	0	0	0.61	0.59	0.58	0	0	0	0	0.12	0	0	0	0	0	0	0
Bcl2	0	0	0	0	0	0	0.49	0.17	0.55	0	0	0	0.07	0.22	0	0.19	0.31	0	0	0	0	0	0	0
Isyna1	0	0	0	0	0	0	0	0	0	0	0	0	0	0	0	0	0.02	0	0.41	0.16	0.22	0	0.01	0.44
Inpp4b	0	0.04	0.02	0	0.27	0	0	0	0	0	0.18	0.46	0	0	0.09	0	0.23	0.2	0	0	0	0.56	0.57	0.47
Htr1f	0	0	0	0.25	0	0.08	0	0	0	0	0.43	0.14	0	0	0	0.11	0	0.25	0	0	0	0	0	0
Mmd2	0	0	0	0	0	0	0.37	0	0.13	0	0	0.51	0	0	0.1	0	0.06	0	0	0	0	0	0.12	0.31
Palmd	0	0	0	0	0	0	0	0	0	0.51	0	0.24	0.13	0	0	0	0	0	0	0	0.04	0.13	0.29	0.09
Mrgprx2	0.64	0	0	0	0	0.61	0	0	0	0	0	0.62	0.62	0	0	0	0	0	0	0	0.94	0	0.04	0
Vat1l	0	0	0.15	0.15	0	0	0	0	0	0.2	0	0.41	0.09	0	0	0	0	0	0	0	0.02	0	0.02	0
Kcnq3	0	0	0	0	0	0	0.02	0.19	0.09	0.28	0.11	0.35	0.14	0.15	0.14	0	0	0	0	0	0.17	0.19	0.2	0
Itpr1	0	0	0	0	0	0	0	0	0.05	0	0.11	0.52	0	0	0	0	0	0	0.49	0.44	0	0.19	0.67	0.44
Ptp4a1	0	0	0	0.37	0.61	0.11	0	0	0	0	0	0	0	0	0	0.15	0	0	0	0	0	0	0	0
Mllt3	0.09	0.05	0.11	0.19	0.32	0	0	0	0	0	0	0	0	0	0	0	0.04	0	0	0	0	0	0.03	0
Rph3a	0	0	0	0	0	0	0.7	0	0	0	0	0	0	0.47	0.01	0	0.61	0.46	0.06	0	0	0	0.16	0.08
Plxdc1	0.17	0.05	0.25	0	0	0	0.04	0	0	0	0	0	0	0	0	0	0	0	0	0	0	0	0	0
Pcbp3	0	0	0	0.03	0.05	0	0.15	0	0.26	0	0	0	0	0	0	0	0.03	0	0	0	0	0	0	0
Emc10	0	0	0	0	0	0	0.03	0	0.1	0	0	0	0	0.03	0	0	0.15	0	0	0	0	0	0	0
Dcbld1	0.06	0	0	0	0	0	0	0	0	0.04	0	0.17	0	0.17	0	0	0.15	0.25	0.61	0	0	0	0	0
Tjp1	0.08	0	0	0.07	0.15	0	0	0	0	0	0	0	0	0	0	0	0.11	0.08	0.07	0.08	0	0.06	0.14	0
Rtl4	0	0	0.29	0.31	0.42	0.37	0	0	0	0	0	0	0	0.2	0.58	0.06	0.34	0	0	0	0	0.37	0.19	0
Gphn	0.18	0	0.2	0.1	0.2	0.11	0.15	0	0	0	0	0.05	0	0	0.2	0	0.1	0	0.12	0	0.12	0	0.13	0
Zan	0	0	0	0.04	0	0.35	0	0	0	0	0.41	0	0	0	0	0	0.15	0.81	0	0	0	0	0.34	0
Csrp2	0.62	0	0.03	0.22	0	0	0	0.07	0.33	0	0.03	0	0	0	0	0	0.1	0	0	0	0	0.03	0	0
Dock7	0	0	0	0	0	0	0.09	0.17	0	0	0.01	0.07	0	0	0	0	0.04	0.02	0	0	0	0	0	0
Lrrc49	0.28	0.05	0.15	0	0.01	0	0	0	0	0	0	0	0	0	0	0	0.12	0	0	0	0	0	0	0
Ptchd4	0	0	0	0	0.37	0.16	0.25	0	0.47	0	0.15	0	0	0.15	0	0	0.15	0	0	0	0.14	0	0	0
Cntrl	0	0	0	0	0.05	0	0	0	0	0.06	0	0	0	0	0	0	0	0	0.62	0.27	0	0	0.15	0
Alkal2	0	0	0	0	0	0	0	0	0	0.9	0	0	0	0.59	0	0.71	0	0	0	0	0	0	0	0
Onecut2	0	0	0	0	0	0	0	0	0	0	0	0	0	0	0	0	0.78	0	0.58	0.92	0	0	0	0
3110021N24Rik	0.11	0.13	0	0	0	0	0.25	0.04	0.27	0	0	0	0	0	0.03	0	0.1	0.1	0	0	0	0	0	0
Gpx3	0	0	0	0	0	0	0	0	0	0	0	0	0	0	0	0	0.16	0	0.17	0	0	0	0	0.62
5330417C22Rik	0	0	0	0	0.1	0	0	0	0	0.17	0.2	0.15	0	0	0.08	0	0.17	0	0	0	0.05	0	0	0
4930599N23Rik	0	0	0	0	0	0	0	0.15	0.03	0.24	0	0	0	0	0	0	0	0	0	0	0	0	0	0
Trpc4	0	0	0	0.52	0.83	0.37	0.57	0	0	0	0	0.46	0	0.29	0	0	0.32	0	0	0	0	0	0	0
Itgav	0	0	0.09	0	0.46	0	0	0	0	0	0	0	0.02	0.32	0	0.84	0.59	0	0	0	0	0	0	0
Runx1t1	0.52	0.46	0.33	0.09	0.8	0.71	0	0	0	0	0	0.75	0	0	0	0	0.42	0	0	0	0	0	0	0
Fam219a	0.15	0	0	0	0.05	0	0	0	0	0	0	0	0	0	0.05	0	0	0	0	0	0	0	0	0
Aldoa	0	0	0	0	0	0	0.12	0	0	0	0	0	0	0.08	0	0.07	0	0	0	0	0	0	0	0.15
Prag1	0	0	0	0	0	0	0	0	0	0	0	0	0	0	0	0	0.13	0.31	0.79	0	0.06	0.76	0.7	0.1
Crtc3	0	0	0	0	0	0	0	0	0	0	0	0	0	0	0	0	0	0.12	0.05	0.14	0	0	0	0
Tom1l2	0	0	0	0	0.12	0	0	0	0	0	0	0	0	0	0	0	0.23	0	0	0	0	0	0	0
Slc13a1	0	0.68	0	0	0	0	0.36	0	0	0	0	0	0.73	0	0	0.91	0.14	0.29	0	0	0	0	0	0
Rbfox1	0	0	0	0	0	0	0	0	0	0.21	0	0.24	0	0.23	0.2	0	0	0.24	0.24	0.23	0.25	0.25	0.24	0.25
4732471J01Rik	0.1	0	0	0.1	0	0	0	0.05	0	0.08	0	0	0	0	0	0	0	0.05	0	0	0	0	0	0
Cmbl	0	0	0	0	0	0	0	0	0	0	0	0	0	0	0	0	0	0	0.82	0.56	0	0.09	0.66	0.12
Wwtr1	0	0	0.03	0	0	0	0.79	0	0	0.51	0	0.91	0	0	0	0	0.29	0	0	0	0.69	0	0	0
Snx7	0	0	0	0	0	0	0	0	0	0.88	0.62	0	0	0	0	0	0.11	0	0	0	0	0	0	0
Irf1	0	0	0	0	0	0	0.23	0	0	0	0	0	0	0	0	0	0.44	0	0.85	0.61	0	0.08	0.13	0
Nsg1	0	0	0	0	0	0	0.11	0	0.02	0	0	0	0	0	0	0.1	0	0	0	0	0	0	0	0.16
Chrdl2	0.93	0	0.73	0	0.63	0	0	0	0	0.09	0	0	0	0	0	0	0.2	0	0	0	0	0	0	0
A130030D18Rik	0.9	0	0	0.49	0.34	0	0.76	0	0	0	0	0	0	0.13	0.05	0	0	0	0	0	0	0	0	0
Rab3d	0	0	0	0.27	0	0	0	0	0	0	0	0	0	0	0	0	0.23	0.75	0.35	0.19	0	0	0	0.87
Ammecr1	0.03	0	0	0	0	0	0.31	0	0.35	0	0	0.14	0	0	0	0	0.24	0	0	0	0	0	0	0
Ppil6	0	0	0.11	0	0	0	0	0	0	0	0	0	0	0	0	0	0	0	0	0.28	0	0	0	0
Tdrd5	0	0	0	0	0	0	0	0	0	0.13	0.24	0.27	0	0	0	0	0	0.41	0	0	0	0	0.27	0.86
G6pc	0	0	0	0	0	0.71	0	0	0	0	0	0	0	0	0	0	0	0	0	0	0	0	0	0
Kcng3	0	0	0.74	0.23	0.49	0	0	0	0	0.28	0	0.38	0	0	0.26	0	0.14	0	0	0	0.5	0	0	0
Klhl1	0	0	0	0	0.76	0	0	0	0.25	0	0	0	0	0	0.52	0	0.53	0	0	0	0.94	0	0	0
Cpeb3	0	0	0.05	0	0	0	0	0.12	0.03	0	0	0.12	0	0	0	0	0.18	0	0	0.07	0	0	0.1	0.19
Dcx	0.42	0.16	0	0	0	0	0	0	0	0	0	0	0	0	0	0	0.02	0.07	0	0	0	0	0	0
Ube2cbp	0	0	0	0	0	0	0	0	0	0	0	0.36	0	0.61	0.14	0	0.09	0.14	0	0.31	0	0.37	0	0
Retn	0	0	0	0	0	0	0	0	0	0	0	0.82	0	0	0	0.14	0.12	0	0.64	0.58	0.67	0	0.41	0.38
Arl8a	0	0.06	0	0	0	0	0	0	0	0	0	0	0	0	0	0	0	0	0.18	0.19	0	0.06	0	0
Stx8	0	0	0	0	0.08	0	0	0	0	0	0	0	0	0	0	0	0	0	0	0	0	0	0	0.11
Drp2	0	0	0	0	0.08	0	0	0	0	0	0	0.18	0	0	0.19	0	0	0	0.48	0.49	0	0.23	0	0
Lama3	0	0.09	0.13	0	0	0	0	0	0	0.6	0.74	0	0.37	0	0	0	0.15	0	0	0	0	0	0	0.01
Ednra	0	0	0	0	0	0	0	0	0.89	0	0	0.08	0.8	0	0	0	0.39	0	0.5	0	0.01	0	0	0.61
Lancl3	0.3	0	0	0	0	0	0	0	0	0.25	0.35	0.11	0.24	0	0	0	0	0	0	0	0	0.83	0	0.25
Rapgef6	0	0.14	0	0	0	0	0	0	0	0	0	0.05	0	0	0.09	0	0.08	0.14	0	0	0.06	0.08	0	0
Layn	0	0	0.53	0.25	0.89	0.69	0	0	0	0	0	0	0	0	0	0	0	0.26	0	0	0	0	0	0.19
5031415H12Rik	0	0	0.28	0	0.51	0	0	0	0	0	0	0.39	0	0.6	0	0	0.08	0	0	0	0	0	0.27	0
Ckap5	0	0	0	0	0	0	0	0	0.04	0	0	0	0	0	0	0	0.16	0	0.08	0	0	0	0	0
Katnal2	0.29	0.06	0.2	0.12	0	0	0	0	0	0	0	0	0	0	0.01	0	0.09	0	0	0	0	0	0	0
Mcu	0	0	0	0	0	0	0	0	0	0.09	0	0.04	0	0.13	0.15	0	0	0	0	0	0	0	0	0
Plcb4	0	0	0	0	0	0	0.21	0	0.4	0.32	0	0.55	0	0.12	0	0	0	0	0.28	0.35	0	0.25	0.49	0
Nsmaf	0.14	0	0	0	0	0	0	0	0	0	0	0	0	0	0	0	0	0.03	0	0	0.1	0	0	0
Gabra5	0	0	0	0	0	0	0	0	0	0	0.02	0.18	0	0	0	0	0	0.19	0.23	0.03	0.07	0.19	0.22	0.05
Rnd1	0.34	0	0	0.27	0.34	0.1	0	0.04	0.29	0	0	0	0.01	0	0	0	0.18	0	0	0	0	0	0	0
4930415C11Rik	0	0	0	0	0	0	0	0	0	0	0	0	0	0.05	0	0	0.4	0	0	0	0	0	0	0.03
Phf24	0	0	0	0	0.08	0.1	0.09	0	0	0.05	0.15	0	0	0	0	0	0.07	0.2	0	0	0	0	0	0
Snhg11	0.24	0.23	0.24	0.05	0.24	0.1	0.24	0.18	0.15	0.21	0.08	0.24	0	0.18	0.22	0	0.25	0.18	0.25	0.24	0.25	0.24	0.25	0.25
Cd200	0	0	0	0	0	0	0.04	0	0.1	0	0	0	0.16	0	0	0.12	0.13	0	0	0	0	0	0	0.12
Scml4	0.56	0.43	0.16	0	0.7	0	0	0	0	0	0	0.27	0.07	0	0	0	0.24	0	0	0	0	0	0	0
Emb	0	0.08	0	0.25	0.17	0.11	0	0	0	0	0	0	0	0	0.15	0	0.07	0	0	0	0	0	0	0
Pcdh9	0	0.01	0.17	0.15	0	0	0.2	0.21	0.22	0.22	0.21	0	0	0	0	0.18	0.24	0.24	0	0.23	0	0	0.36	0.26
Etnk2	0	0	0	0	0	0	0	0	0	0	0	0	0	0	0	0	0	0	0.84	0.7	0.05	0.07	0.14	0.14
Strip2	0	0	0	0	0	0	0	0	0	0	0	0.56	0	0	0.29	0	0	0.28	0	0	0.4	0.3	0	0.87
Clvs1	0.03	0	0	0	0.02	0	0	0	0	0.11	0	0	0.02	0	0	0	0	0.05	0	0	0	0	0	0.01
Nrbp2	0.33	0.06	0.11	0	0	0.05	0	0	0	0.12	0.18	0	0	0	0	0	0	0	0	0	0	0	0	0
Grm5	0.2	0	0	0	0	0	0	0.23	0.12	0.23	0.15	0.25	0.2	0.23	0.24	0.2	0.03	0.22	0	0	0.24	0.24	0.25	0.25
Megf6	0	0	0.08	0	0.37	0	0	0	0	0	0	0	0	0	0	0	0.05	0	0	0	0.01	0	0.21	0
Skor2	0	0.98	0	0	0	0	0	0	0	0	0	0	0	0	0.66	0	0.75	0	0	0	0	0	0.19	0
Ildr1	0	0.04	0.23	0.58	0.96	0	0	0	0	0	0	0	0.89	0	0.54	0	0.1	0	0	0	0	0	0	0
Rims1	0.08	0.2	0	0.15	0.14	0.17	0.21	0	0	0.08	0	0.15	0.12	0	0.17	0	0.18	0.14	0	0	0.05	0	0	0
Adra1a	0.82	0	0.2	0	0	0	0	0	0	0	0	0	0.57	0.4	0.58	0	0.18	0	0	0	0.54	0	0	0.08
H2-D1	0.02	0.18	0.06	0	0	0	0.05	0	0	0	0	0	0	0	0	0	0.42	0	0	0	0	0	0	0
Cntnap4	0.6	0.35	0	0	0	0.14	0.33	0	0	0.15	0.1	0	0.44	0.28	0.72	0.21	0.08	0	0	0	0	0.36	0	0
Thbs3	0.3	0	0	0	0.38	0	0	0	0	0.01	0	0.14	0	0	0	0	0.09	0	0	0	0	0	0	0
Stk19	0	0	0.02	0	0	0	0	0	0	0	0	0	0	0	0	0	0	0	0	0	0.09	0	0	0
Hmgcs1	0	0.09	0.06	0	0	0	0	0	0	0	0	0	0.03	0	0	0.08	0	0	0	0	0	0	0	0.54
Lrp3	0	0	0	0	0	0	0	0	0	0	0	0	0	0	0	0	0	0.1	0.22	0	0	0.32	0.13	0
D10Wsu102e	0	0	0	0	0	0	0	0	0	0.06	0	0	0	0	0	0	0	0.11	0	0	0	0	0	0
Trpc5	0	0	0.43	0.5	0.71	0.54	0	0	0	0	0	0.02	0	0.49	0.61	0	0.23	0	0	0	0	0	0	0
Osbpl9	0	0	0	0	0	0	0	0.02	0.19	0.06	0.16	0	0	0.17	0	0	0	0.17	0.15	0	0.04	0.16	0	0.22
2810471M01Rik	0	0.99	0	0	0	0	0	0	0	0	0	0	0	0	0	0	0	0	0	0	0	0	0	0
Sh3bgrl	0	0	0	0	0	0	0.07	0	0	0.26	0.01	0	0	0	0	0.54	0.17	0	0	0	0	0	0	0
Gnai1	0	0	0.32	0.12	0	0.14	0	0	0	0	0.01	0	0.13	0	0	0	0.1	0	0	0	0	0	0	0
Stag2	0	0	0	0	0	0	0.01	0.23	0.09	0	0	0	0	0	0	0	0.14	0	0	0	0	0	0	0
Pcmtd1	0	0	0	0	0	0	0	0	0	0.2	0	0.1	0	0	0	0	0.22	0	0	0	0	0	0	0
Wasf1	0	0.21	0	0	0	0	0	0	0	0.27	0	0	0	0	0	0	0	0	0	0	0	0	0	0
Apc	0	0	0	0	0	0	0	0	0.08	0.14	0.09	0.12	0	0	0	0	0	0.04	0.11	0.01	0	0	0.07	0.09
Prkaa2	0.38	0	0	0.07	0.05	0.13	0	0	0	0	0.24	0	0.17	0	0	0	0	0	0	0	0	0	0	0
Hydin	0	0	0	0	0	0	0	0	0	0.47	0	0	0	0	0	0	0	0	0.89	0.81	0.02	0.31	0.73	0.74
Fxyd6	0	0	0	0	0	0	0.44	0.33	0.11	0	0	0	0	0	0	0	0.23	0	0	0	0	0	0	0
Shh	0	0.25	0	0	0	0	0.1	0	0	0	0	0.33	0	0	0	0	0	0.82	0.06	0	0	0.13	0.21	0.06
Ppfibp2	0	0	0	0	0	0	0	0	0.63	0	0	0	0	0.6	0.72	0	0	0	0	0	0.8	0	0.23	0
Kcnv1	0	0	0	0	0	0	0	0	0	0	0	0	0	0	0	0.08	0	0	0.62	0	0.28	0	0.21	0.87
Map4k4	0	0.09	0	0.07	0.1	0	0	0	0	0	0	0	0	0	0	0	0	0	0	0	0	0	0	0
Cyp20a1	0	0	0	0	0	0	0	0	0	0	0	0	0	0	0	0	0.07	0	0.6	0.02	0	0	0	0.08
Klf7	0	0.03	0	0	0	0	0	0	0.32	0.07	0	0.02	0	0	0	0	0.15	0	0	0	0	0	0	0
Ptp4a2	0	0	0	0	0	0	0	0	0	0.01	0	0.12	0	0	0	0	0	0	0.13	0.28	0	0	0	0
Ip6k1	0	0	0	0	0	0	0	0	0	0	0	0.2	0	0	0	0	0	0	0	0	0	0	0	0
Slc43a2	0	0.05	0	0	0.17	0	0	0	0.04	0	0	0	0	0	0	0	0.23	0	0	0	0	0	0	0
Gabre	0.7	0.82	0	0	0	0	0	0	0	0	0	0.15	0.28	0	0.24	0	0.32	0	0	0	0	0	0	0
Rgs9	0.33	0.4	0	0.11	0.25	0	0	0	0	0.42	0	0	0	0	0	0	0	0	0	0	0	0	0	0
Ivns1abp	0	0.27	0	0	0	0	0	0	0	0	0	0	0	0	0	0	0.02	0.12	0	0	0	0	0.09	0
Kcnh1	0.13	0	0.05	0.18	0	0.31	0	0	0	0.27	0	0.38	0	0	0	0	0	0.18	0	0	0.51	0	0	0
Atp7b	0.94	0.17	0	0	0	0	0	0	0	0.19	0	0.43	0	0	0.63	0	0	0	0	0	0	0	0	0
D030068K23Rik	0	0	0	0	0	0.17	0	0.21	0	0	0.17	0	0	0	0	0.1	0	0.26	0.34	0	0.7	0.42	0.04	0
Ttc39c	0	0	0	0	0	0	0	0	0	0.38	0	0.6	0	0.04	0	0	0	0	0	0	0.05	0	0.11	0
E430024P14Rik	0	0	0	0	0	0	0	0	0	0	0	0	0	0	0	0	0	0.09	0.58	0.43	0	0.01	0.44	0
Tet2	0	0	0	0	0.07	0	0	0	0	0.17	0.05	0	0	0	0	0	0.21	0	0	0	0	0	0	0
Diaph3	0	0	0	0.16	0.06	0	0	0	0	0.08	0	0	0	0	0	0	0.14	0	0.42	0	0	0	0.23	0
Ifi27l2a	0	0	0	0	0	0	0	0.83	0.82	0.06	0.46	0.63	0	0.57	0	0	0	0	0	0	0	0.37	0	0
Slitrk5	0	0	0.18	0.3	0	0.05	0	0	0	0	0	0	0	0	0	0	0	0	0.01	0	0	0	0	0
Dpp10	0	0	0.24	0.23	0	0.18	0.21	0.26	0	0.13	0	0.16	0.17	0	0.17	0	0.14	0.24	0.2	0	0	0	0	0
Eya1	0	0	0	0	0	0	0	0.99	0	0	0.53	0.89	0	0	0	0	0	0	0	0	0	0	0	0
Amelx	0.87	0	0	0	0	0	0	0	0	0	0	0	0	0	0	0	0.4	0.1	0.84	0.74	0.59	0.31	0	0.15
Ccdc85a	0	0	0	0	0.09	0	0	0	0	0.19	0.18	0.18	0.01	0.05	0.14	0.18	0	0	0	0	0	0	0	0.17
Siah3	0	0	0	0	0	0.13	0.44	0	0.04	0	0	0	0.22	0	0	0.05	0.11	0	0	0	0	0	0	0
Pbx1	0	0	0	0	0	0	0	0	0.22	0.27	0.08	0.22	0.22	0	0	0	0.05	0	0	0.01	0	0.02	0.23	0.18
Arhgap24	0	0	0.47	0.06	0.02	0.42	0.5	0	0	0	0	0	0	0	0.09	0	0.28	0	0.39	0	0.08	0	0	0
Hdac4	0	0	0.11	0	0.11	0	0	0.2	0	0.01	0	0	0	0	0	0	0	0	0	0	0	0	0	0
Tex47	0	0	0	0.4	0	0	0.81	0	0.91	0.77	0	0	0	0	0	0.27	0.21	0	0	0	0	0	0	0
Stk40	0	0	0	0	0	0	0	0	0	0	0	0.25	0	0	0	0.03	0	0	0	0	0.35	0	0	0.16
Rhbdl3	0	0	0	0	0	0	0	0	0	0.16	0.2	0	0.07	0.1	0	0	0	0.2	0	0	0.2	0	0	0.1
Pacs1	0.09	0.04	0	0.05	0	0	0	0	0	0.06	0	0	0	0	0	0.02	0.04	0.13	0	0	0	0	0	0
Gadd45g	0.07	0	0.01	0.52	0	0	0	0	0	0	0	0.09	0	0	0	0	0.29	0	0	0	0	0	0	0
Abat	0	0	0	0	0	0	0	0	0	0	0	0.05	0	0	0	0	0.12	0.09	0.16	0.1	0	0	0	0.12
Pag1	0	0	0	0	0	0	0	0	0	0	0	0	0	0	0	0	0	0.12	0.06	0.04	0	0	0	0
Lrrn1	0	0	0	0	0	0	0	0.24	0	0	0	0	0	0.38	0.63	0	0	0	0	0	0.02	0.8	0.25	0
Chrna4	0	0	0	0	0	0	0	0	0	0	0	0	0.05	0	0	0	0	0.34	0.29	0	0.36	0.86	0.27	0.64
Map1b	0	0.1	0	0	0	0	0	0	0	0	0	0.21	0	0	0.1	0	0.15	0	0.2	0.14	0.13	0.18	0.18	0.19
Parva	0	0	0	0	0	0	0.73	0	0	0	0	0	0	0.79	0	0	0.02	0.68	0	0	0	0	0	0
Necab3	0.17	0	0	0	0	0	0.01	0	0	0	0	0	0	0	0	0	0.06	0.12	0	0	0.17	0.03	0	0
Plcz1	0	0	0	0	0	0	0	0	0	0	0.22	0	0	0	0	0	0.26	0.32	0.63	0.75	0.1	0.13	0	0.43
Chrm2	0	0	0	0	0	0.36	0.61	0.31	0.68	0	0	0	0	0	0	0	0.48	0.52	0.72	0	0	0	0	0.34
Dennd3	0	0	0.07	0.38	0.26	0	0	0	0	0	0	0	0	0	0	0	0.26	0.17	0	0	0	0	0	0
Nrip1	0	0.16	0	0.08	0	0	0	0	0.26	0	0	0	0	0	0	0	0.1	0.42	0	0	0	0	0	0
Ush1c	0.35	0	0.91	0.79	0.85	0	0	0	0	0	0	0	0	0	0.49	0	0.14	0	0	0	0	0	0	0
Ttll3	0.2	0	0	0	0	0	0	0	0	0	0	0	0	0	0	0	0.51	0	0.52	0.05	0	0	0.11	0.11
Itfg1	0	0	0.04	0	0	0	0.03	0.15	0.09	0.03	0	0	0	0	0	0	0.25	0	0	0	0	0	0	0
Gpr83	0	0	0.78	0.84	0	0.59	0	0	0	0	0.57	0	0	0	0	0	0	0	0	0	0	0	0	0
Plcxd2	0	0	0	0	0	0	0	0.08	0	0	0	0.29	0	0	0	0	0	0.13	0	0	0.09	0	0.57	0.12
Mb	0	0	0	0	0	0	0	0	0.13	0.14	0	0.64	0.91	0	0.68	0	0	0	0.07	0	0	0	0	0
Vmn1r52	0	0	0	0	0	0	0	0	0	0.68	0	0	0	0	0	0	0	0	0	0	0	0	0	0
Epha4	0.32	0	0	0	0	0.15	0.22	0.07	0	0.46	0	0.14	0.09	0.08	0	0.28	0	0.02	0	0	0.34	0	0	0.05
Ttc37	0	0	0	0	0	0	0	0	0	0	0	0.26	0	0	0	0	0.13	0	0	0	0.04	0	0	0
Paqr8	0.09	0	0	0	0	0	0	0	0	0.15	0	0.84	0	0	0	0	0	0	0	0	0	0	0	0.08
Nrp1	0.65	0.5	0	0	0	0	0.27	0.31	0.86	0.21	0	0.57	0.5	0	0	0.56	0.69	0	0	0	0	0	0	0
Ar	0.29	0.27	0.41	0.03	0.54	0	0	0	0	0	0	0.21	0.08	0	0.44	0	0	0	0	0	0.17	0	0	0
Nrxn3	0.17	0.2	0	0	0.09	0	0.16	0	0.28	0.08	0	0.38	0.1	0	0.09	0.1	0.55	0	0	0	0	0.21	0.17	0.05
Nfib	0	0	0	0	0	0	0.97	0.84	0.96	0	0	0	0	0.11	0	0	0.31	0	0	0	0	0	0	0
Srebf2	0	0	0.1	0	0	0	0	0	0	0	0	0	0	0	0	0	0	0	0	0	0	0	0	0
Hunk	0.86	0.95	0.07	0	0	0	0.54	0	0.57	0	0	0	0.54	0	0	0	0.36	0	0	0	0	0	0	0
Aff3	0.05	0	0.06	0	0	0.05	0	0	0	0	0	0.19	0	0.08	0.17	0	0	0	0	0	0	0.15	0.11	0
Cc2d2a	0	0	0	0	0	0	0.41	0	0	0	0	0	0	0	0	0	0.03	0.09	0	0	0	0	0.06	0
Slc4a7	0	0	0	0.05	0	0	0.2	0.15	0.05	0	0.05	0	0	0	0	0	0	0	0	0	0	0	0	0
Dpp6	0	0.05	0	0	0	0	0.21	0.05	0.04	0	0.02	0	0	0.13	0.2	0	0.21	0.21	0.18	0.17	0	0.15	0	0.01
Parp4	0	0	0	0	0.46	0	0	0	0.17	0	0	0.46	0	0	0	0	0.99	0	0	0	0	0	0	0
Phf20l1	0	0	0	0	0	0	0	0	0	0.16	0.02	0.02	0	0	0	0	0	0	0	0	0	0	0	0
Egfl6	0.98	0.83	0	0.31	0	0.73	0	0	0	0	0.15	0	0	0	0	0	0.13	0	0	0	0	0	0	0
Nova1	0.17	0.19	0	0	0	0	0.05	0.08	0	0	0	0.08	0.12	0.05	0.18	0.08	0	0.2	0	0	0	0.09	0	0
Xk	0	0	0	0	0	0	0	0	0	0	0	0	0	0.17	0	0	0	0	0	0	0.01	0.51	0.19	0.41
Nrp2	0	0	0.47	0.46	0.59	0	0.41	0.24	0.64	0	0	0.16	0	0	0	0	0.33	0	0	0	0	0	0	0
Atp1b3	0	0	0	0	0	0	0.17	0	0.08	0	0	0	0	0	0	0	0	0	0	0	0	0	0	0
Plcl1	0.72	0.19	0	0	0.05	0	0	0	0	0.17	0	0.37	0.23	0	0.54	0	0	0	0	0	0.08	0	0	0
Stx3	0.2	0.08	0.04	0	0	0	0	0	0	0.04	0	0.21	0	0	0.12	0	0	0	0	0	0.07	0.05	0	0
Abcg1	0	0	0	0	0	0	0	0.02	0	0	0	0	0	0	0.02	0	0	0	0.12	0	0	0	0	0
Pcdh17	0.43	0.24	0.45	0.45	0.73	0.45	0	0	0	0	0	0	0	0	0	0	0.23	0	0.09	0	0.07	0	0	0
Gnas	0.22	0.17	0.16	0	0	0	0.21	0.03	0.12	0	0.12	0.17	0.13	0.04	0.07	0	0.22	0	0	0	0	0	0	0
Sema3e	0	0	0	0.64	0.22	0.95	0	0	0	0	0.08	0.02	0	0	0	0	0.19	0	0	0	0	0	0	0
A730049H05Rik	0	0	0.24	0	0	0	0	0	0	0	0	0	0	0	0	0	0	0	0.51	0.12	0.91	0.78	0.86	0.24
AY036118	0	0	0	0	0	0	0.09	0	0.01	0	0.41	0	0	0	0.14	0	0	0	0	0	0	0	0	0
Nebl	0.15	0.06	0.18	0.07	0.22	0.12	0	0	0	0	0	0.17	0.14	0	0.22	0	0	0	0	0	0.17	0.1	0.16	0
Lrrc43	0	0.07	0.32	0	0	0.21	0	0.18	0	0	0	0	0.15	0	0	0	0.41	0	0	0	0	0.17	0	0.27
Uck2	0	0	0	0	0	0	0	0.11	0	0.28	0	0.69	0	0	0	0	0.15	0	0	0	0	0	0.26	0
Arntl2	0	0	0	0	0.04	0	0	0	0	0	0	0	0	0	0	0	0.01	0	0.4	0.02	0	0	0.37	0
Gad1os	0	0.1	0	0.52	0	0	0	0.35	0	0	0.01	0	0	0	0	0	0.97	0	0	0	0	0	0	0
Patj	0	0	0	0	0	0.03	0.53	0	0.6	0	0	0.19	0	0	0	0	0	0	0	0	0	0	0	0
9130015G15Rik	0	0	0.34	0	0.52	0	0	0	0	0	0	0	0	0	0	0	0.01	0	0.63	0.47	0.77	0	0.09	0
Dpyd	0	0.15	0.16	0	0	0	0	0	0	0	0	0	0	0	0	0	0.14	0	0.42	0.3	0.19	0.38	0.55	0.35
Npl	0	0	0.09	0	0	0	0	0	0	0.17	0.56	0	0	0	0	0.05	0	0	0	0	0	0	0.21	0.28
Casr	0	0	0.47	0.84	0.84	0	0	0	0	0	0.23	0	0	0	0	0.56	0	0.45	0	0	0	0.1	0	0.07
Sil1	0	0	0	0	0	0	0	0	0	0	0	0	0	0	0	0	0.14	0	0.1	0	0	0	0	0
Doc2b	0	0	0	0	0	0	0.46	0	0	0	0	0.06	0	0	0	0	0	0.33	0.26	0.13	0	0.12	0.63	0.7
Tnxb	0	0	0	0	0	0	0	0	0	0.31	0.05	0.01	0.81	0	0	0	0.24	0	0	0.59	0	0.5	0.27	0.12
Spint1	0	0.4	0.79	0	0	0	0	0	0	0.12	0	0.6	0	0	0	0	0	0	0.21	0.14	0.65	0	0.55	0
C230004F18Rik	0.07	0.03	0.08	0	0.13	0	0	0	0	0.09	0	0	0	0	0	0	0	0.03	0	0	0	0	0.1	0
Heca	0	0	0	0	0.28	0	0	0	0.24	0.34	0.35	0	0	0	0	0	0.04	0	0	0	0	0	0	0
Tmem47	0.02	0	0	0	0	0	0	0	0	0.17	0	0	0	0	0.04	0	0.11	0	0	0	0.05	0	0	0
Grk5	0.3	0	0	0	0	0	0	0	0	0.31	0.4	0	0	0	0	0.15	0.05	0	0	0.02	0	0	0	0
A430090L17Rik	0.52	0	0.06	0	0	0	0	0	0	0	0	0.15	0.08	0	0	0	0.04	0	0	0	0.18	0.08	0	0
Tbc1d12	0	0	0.18	0.15	0.11	0.06	0	0	0	0	0	0	0	0	0	0	0	0	0	0	0	0	0	0
Ago3	0.14	0	0	0	0.24	0.03	0	0	0	0	0	0	0	0	0	0	0.21	0	0	0	0.01	0	0	0
Tmem131	0.13	0.11	0	0	0	0.03	0	0	0	0	0.02	0	0	0	0	0	0	0	0	0	0	0	0	0
Epha8	0	0	0	0	0	0	0.11	0	0	0	0	0.83	0	0	0	0	0.16	0.3	0	0	0.2	0	0	0.76
Thoc2	0	0	0	0	0	0	0.11	0.08	0.1	0	0	0.07	0	0	0	0	0	0	0	0	0	0	0	0.02
Adgrl2	0	0	0.15	0.12	0	0.02	0	0	0	0	0.04	0	0	0	0	0	0	0.03	0.02	0	0.16	0	0.43	0.18
Sh2d1a	0	0.38	0.81	0.29	0.1	0.03	0	0	0	0.03	0	0.41	0	0	0	0	0.2	0	0	0	0	0	0	0
Nsdhl	0	0.49	0	0	0	0	0	0	0	0	0	0	0	0	0.06	0	0.1	0	0	0	0	0	0.21	0.11
Usp29	0	0	0.21	0.02	0.18	0	0.06	0	0	0	0	0	0	0	0.17	0	0.17	0	0.22	0.17	0.18	0.09	0.21	0
Tmem28	0	0	0	0.4	0.53	0.06	0.08	0	0.06	0	0	0	0	0.12	0.14	0	0.17	0	0	0	0	0.05	0	0
Anapc16	0	0	0	0	0	0	0.08	0	0.01	0	0	0	0	0.04	0	0	0.31	0	0	0	0	0	0	0
Adgb	0	0	0	0	0	0	0	0	0	0	0	0	0	0	0	0	0.21	0	0.94	0.8	0.08	0	0.15	0.55
Gpr158	0.18	0.1	0	0	0	0	0.09	0.07	0.16	0.08	0.02	0.15	0.17	0.15	0.09	0	0.12	0.02	0	0	0	0	0	0
Kif26a	0	0	0	0.31	0	0	0.22	0.04	0	0	0.79	0	0	0	0	0	0	0.14	0	0.22	0	0	0	0.5
Psd3	0	0	0.09	0	0	0.01	0	0	0	0	0	0	0	0	0	0.06	0.03	0.19	0.01	0	0	0	0.56	0.07
Tinag	0.07	0	0.48	0	0	0	0	0	0.23	0	0	0.18	0.75	0	0	0.94	0	0	0	0	0	0.15	0	0
5830432E09Rik	0	0.29	0.24	0.74	0.21	0.27	0	0	0	0	0	0	0	0	0.06	0	0	0	0	0.27	0.63	0	0	0
Snrnp48	0	0	0	0	0	0	0	0	0	0	0	0	0	0	0	0	0.17	0	0.09	0	0	0	0.02	0.14
Adgrg4	0	0	0	0	0	0	0	0	0	0	0	0	0	0.98	0.88	0	0	0	0	0	0.42	0.42	0	0.35
C530008M17Rik	0.12	0.03	0	0	0	0	0	0.15	0	0.2	0.16	0.13	0	0	0	0	0	0	0	0	0	0.13	0	0
Ndn	0	0	0	0	0	0	0.2	0.17	0.16	0	0	0	0	0.18	0	0	0	0	0	0	0	0	0	0.06
Adgrv1	0	0	0	0	0	0	0	0	0	0	0	0	0	0	0.05	0	0.17	0.4	0.77	0.76	0.37	0.47	0	0.05
Gas2l3	0	0	0	0	0	0	0.93	0	0.64	0	0	0	0	0	0	0	0	0	0	0	0	0	0.53	0
A230050P20Rik	0	0	0.05	0	0	0.04	0	0	0	0	0	0	0	0	0	0	0	0	0	0	0	0	0	0.12
Sept11	0	0	0	0	0	0	0	0	0	0	0	0	0	0	0	0	0	0.12	0.45	0.28	0.16	0.08	0.15	0.37
Cyth1	0	0	0	0	0	0	0	0	0	0	0.07	0.37	0	0	0	0	0	0	0	0	0	0	0	0
Slc44a5	0	0.49	0.44	0.36	0.42	0.23	0	0	0	0	0	0	0	0	0	0	0.35	0	0	0	0	0	0	0
D630023F18Rik	0	0	0	0	0	0	0	0	0	0	0	0	0.32	0	0.04	0	0.15	0	0.12	0.86	0.27	0.27	0.34	0
Pds5b	0	0	0	0	0	0	0	0	0.1	0.19	0.2	0	0	0.04	0	0	0	0.22	0	0	0	0	0	0
Sytl4	0	0	0	0	0	0	0.42	0	0	0	0	0	0.16	0	0.06	0	0.1	0.87	0.23	0	0	0.84	0	0.75
Cdh24	0.35	0.45	0	0	0.52	0	0.59	0	0	0	0	0	0.29	0.11	0.34	0	0.05	0	0	0	0	0	0	0
Cdkl5	0	0	0	0.11	0.41	0	0.6	0.04	0.49	0.15	0.35	0	0	0	0	0	0.08	0	0	0	0	0	0	0
Frmd5	0	0.08	0.18	0.21	0.18	0	0.02	0	0	0	0	0	0	0	0	0	0.14	0.2	0.17	0	0.18	0	0.01	0
Tmem167	0.04	0	0	0	0	0	0	0	0	0.22	0	0.01	0	0	0	0	0	0	0	0	0	0.02	0	0
Elovl2	0	0	0.45	0.26	0.68	0.2	0	0	0	0	0	0.14	0	0	0	0	0.17	0	0.23	0.29	0	0	0	0
Lix1	0	0.35	0	0	0.48	0	0	0	0	0.87	0	0.34	0.59	0	0.14	0	0.19	0	0	0	0	0	0	0
Mapk3	0	0	0	0	0	0	0	0	0	0	0	0	0	0	0	0	0.01	0	0.15	0.6	0	0.09	0	0.27
Filip1	0	0	0	0	0	0	0	0	0	0.21	0.55	0.12	0	0	0	0	0.1	0	0.45	0.04	0	0.3	0.65	0
Setd7	0	0	0	0	0.01	0	0	0	0	0	0	0	0	0	0	0	0.08	0	0.16	0.17	0	0	0	0
Snrpn	0	0	0	0	0	0.18	0.15	0	0	0	0	0.11	0.07	0.06	0.04	0.15	0.08	0.17	0	0	0.05	0	0	0
Tspoap1	0	0.02	0	0	0	0	0	0	0	0	0.04	0	0	0	0	0	0	0	0	0	0.12	0	0	0
Cntnap3	0	0	0	0	0	0	0.11	0	0	0.99	0	0.79	0	0	0	0	0.12	0	0	0	0	0	0	0
Rcan2	0	0	0	0.09	0	0	0	0	0	0	0	0.12	0.08	0	0	0	0.24	0	0	0	0	0	0	0.04
Sh3d21	0	0.23	0	0	0	0	0	0	0	0.81	0	0.79	0	0	0.66	0	0.26	0	0	0	0	0	0	0
Senp8	0.11	0.09	0.12	0	0	0	0	0	0	0	0	0	0	0	0	0	0.23	0	0.2	0	0	0	0	0
Atp1b1	0	0	0	0	0	0	0.17	0.12	0.2	0	0	0	0	0.18	0.16	0.11	0.11	0	0	0	0	0	0.09	0.12
Best3	0	0	0	0	0.95	0.47	0	0	0	0	0	0	0	0	0	0	0.24	0	0	0.46	0.48	0	0	0
Abtb2	0	0	0	0.37	0.95	0.27	0	0	0	0	0	0	0	0	0	0.02	0.33	0	0	0	0	0	0	0
1700016K05Rik	0	0	0	0	0.63	0	0	0	0	0.08	0.29	0.11	0.63	0	0	0.45	0	0	0	0	0.02	0	0	0
Cd1d1	0.42	0.49	0.15	0.79	0.52	0	0	0	0	0	0	0	0	0	0	0	0.6	0	0	0	0	0	0	0
Gstt2	0	0.32	0.23	0.19	0	0	0.79	0	0.54	0	0	0	0	0.05	0.07	0	0.14	0.06	0	0	0	0	0	0
Tox3	0	0	0	0	0	0	0.19	0	0.47	0	0	0	0	0.11	0	0	0	0	0	0	0.13	0.03	0	0.14
Evc2	0	0	0	0	0.13	0	0	0	0	0.41	0	0.05	0	0	0	0	0.05	0	0	0	0.31	0.88	0.45	0.28
Dnah9	0	0	0	0	0	0	0	0	0	0	0	0	0	0	0	0	0.33	0	0.54	0	0.07	0.25	0	0.61
Rab33a	0	0	0	0	0	0	0.23	0.1	0.03	0.04	0.19	0	0	0.02	0	0	0.05	0.59	0	0	0	0.48	0	0
Cadps2	0.2	0	0	0	0	0	0.56	0.09	0	0	0	0	0.32	0.41	0.23	0.2	0	0.24	0.08	0.21	0.2	0.23	0	0
Faah	0	0	0	0	0	0	0	0	0	0	0	0	0	0	0	0	0.01	0	0.57	0.32	0	0	0	0
Lrrc4c	0	0	0.1	0.22	0	0.22	0.1	0.23	0.23	0.25	0.09	0.24	0	0	0	0	0.25	0.02	0	0	0.06	0	0.1	0.01
Adam23	0.13	0.25	0	0	0	0	0	0	0	0	0	0.02	0.21	0.03	0.24	0	0	0	0	0	0	0	0	0
Tm7sf3	0	0	0	0	0	0	0	0	0	0	0	0	0	0	0	0	0.02	0	0	0	0	0.01	0	0
[truncated: 1,742 more rows]
