# Supplementary material for: Cross-species analysis defines the conservation of anatomically segregated VMH neuron populations
Source: eLife journal article supplement (doi:10.7554/elife.69065), 2021-05-21
Supplement: supp [file elife-69065-supp-v1.zip › elife_poa_e69065_Supplementary_file_5.csv]

Gene	Bead	Sup	Enrichment	P
Gm14236	7.94	0.2	5.18	4.0e-16
Gm7695	8.23	1.07	3.63	7.6e-03
Gm26917	2061.58	156.33	3.53	1.1e-169
Gfp_L10a	464.37	62.04	3.02	1.1e-03
Bahcc1	258.52	41.08	2.59	2.4e-84
Prlh	2.72	0.43	2.57	3.0e-04
Gucy2c	1.24	0.25	2.31	2.7e-02
Yeats2	130.78	28.17	2.16	1.9e-04
Tnrc18	561.54	123.85	2.1	5.3e-56
H2-T-ps	6.94	1.8	1.96	7.0e-07
Lipg	1.78	0.53	1.81	3.0e-02
Acp7	2.74	0.79	1.8	4.8e-03
Nr5a1	176.43	51.93	1.76	4.9e-54
Fezf1	200.51	58.66	1.74	3.5e-42
Nr5a1os	2.64	0.77	1.73	9.7e-03
Lbhd2	84.65	26	1.72	8.2e-28
Nms	2.06	0.66	1.69	2.5e-02
Adcyap1	179.07	57.75	1.65	4.5e-44
Foxa1	5.47	1.65	1.62	6.3e-04
C130093G08Rik	61.66	20.1	1.61	3.9e-27
H2-Bl	7.61	2.52	1.6	1.4e-05
Neurod6	2.22	0.78	1.59	3.1e-02
Pitx2	13.36	4.81	1.57	1.6e-07
Nrgn	425.16	147.16	1.56	1.7e-29
H2-Q2	50.36	17.27	1.54	2.8e-22
Krt18	13.68	4.82	1.51	7.6e-08
C1ql2	32.8	11.66	1.51	2.9e-14
Barhl1	6.66	2.08	1.5	7.6e-04
Nptx2	76.79	27.2	1.5	3.5e-25
Gm12408	3.68	1.32	1.49	5.8e-03
Rasl11a	9.26	3.33	1.49	8.1e-06
Bdnf	29.95	10.78	1.48	2.1e-14
Rprml	20.49	7.53	1.47	2.5e-10
Gt(ROSA)26Sor	10.11	3.76	1.47	8.3e-06
Cd36	3.82	1.4	1.46	6.6e-03
Calca	4.64	1.73	1.43	3.1e-03
Tnfrsf8	30.82	11.61	1.42	2.2e-13
Prr19	3.52	1.28	1.4	1.5e-02
Irx6	3.42	1.42	1.34	2.2e-02
Umodl1	6.75	2.86	1.34	1.0e-03
Nr0b1	12.16	4.81	1.33	5.6e-06
Grhl1	49.56	19.85	1.32	1.0e-16
C130021I20Rik	11.55	4.29	1.31	4.7e-05
Chst8	32.57	13.31	1.31	7.3e-11
Cbln1	243.43	98.22	1.29	1.8e-22
Sox14	19.49	7.82	1.29	1.9e-06
Pdyn	125.95	51.81	1.28	3.4e-23
Shox2	6.08	2.48	1.27	4.4e-03
Nkd2	41.03	17.12	1.26	1.0e-13
Rasd1	25.05	10.38	1.26	2.9e-09
Neurod2	4.15	1.8	1.26	2.1e-02
Rpusd1	122.99	52.18	1.25	9.1e-20
Nxph4	17.87	7.65	1.25	3.7e-07
Fxyd7	93.55	40.09	1.24	2.2e-16
Slc17a6	243.55	103.11	1.24	1.8e-30
2010204K13Rik	103.24	43.86	1.24	7.5e-22
Rtn4r	11.3	4.78	1.23	3.9e-05
Lamb3	22.53	9.71	1.23	7.4e-08
Ccdc42	5.62	2.42	1.23	4.2e-03
Nrn1	32.08	13.68	1.23	4.2e-11
Gm8420	6.83	3.2	1.23	2.0e-03
Chrm5	29.31	12.8	1.22	1.3e-09
Uqcr11	52.09	22.97	1.22	9.3e-12
Hspa1b	2.96	1.3	1.21	4.9e-02
Rin1	22.96	9.9	1.21	2.9e-08
Rerg	84.92	36.51	1.21	9.8e-19
Shh	6.2	2.68	1.21	4.2e-03
Flpo	56.51	24.6	1.2	2.1e-15
Igbp1b	3.45	1.47	1.2	4.1e-02
Tac1	66.75	29.12	1.2	1.1e-16
Bcor	74.49	32.6	1.2	1.9e-17
Aldh3b2	19.67	8.76	1.18	4.8e-07
Doc2b	460.31	203.29	1.18	5.8e-31
A830011K09Rik	5.17	2.32	1.18	7.9e-03
Mc3r	14.44	6.37	1.18	7.1e-06
Gse1	190.08	81.22	1.18	2.3e-21
Rai14	23.98	10.62	1.18	1.7e-08
Itpka	23.97	10.62	1.17	5.4e-08
Cmbl	49.54	22.28	1.17	1.5e-12
Barx2	9.86	4.43	1.16	3.4e-04
Cckbr	15.94	7.17	1.16	7.0e-06
Atp6v1c2	10.87	4.86	1.15	1.4e-04
Dctn1	1076.59	491.1	1.15	7.2e-24
Rnf208	321.86	147.39	1.15	1.3e-24
Tmem35a	123.27	55.65	1.14	1.6e-20
Doc2a	71.09	32.44	1.14	4.0e-15
Rgs14	38.5	17.44	1.14	1.4e-09
Sf3b5	46.38	22.23	1.14	2.1e-08
6430628N08Rik	5.95	2.86	1.14	8.5e-03
Uncx	8.09	3.82	1.14	1.6e-03
Camkv	866.58	394.03	1.14	1.5e-26
Gpr6	4.46	2.08	1.13	2.6e-02
C1qtnf4	66.53	33.34	1.13	5.8e-10
Selenom	134.62	65.91	1.13	5.8e-11
Gm13394	55.33	24.05	1.13	1.7e-11
Kncn	5.18	2.37	1.12	1.1e-02
Prdm8	4.55	2.17	1.12	2.3e-02
Hk2	20.61	9.49	1.12	5.3e-07
Nov	11.01	5.09	1.1	2.6e-04
Vgll2	3.92	1.96	1.1	4.7e-02
Camk1g	185.41	86.19	1.1	1.6e-21
Baiap2	175.99	81.79	1.1	4.6e-17
Smim18	10.83	5.07	1.1	3.6e-04
Hes6	58.32	27.73	1.1	4.3e-11
Fam110a	33.97	16.2	1.08	1.8e-08
Nhlh2	23.19	10.95	1.08	3.7e-07
Nbdy	76.29	35.98	1.08	7.2e-14
Hs3st4	135.87	65	1.07	5.1e-19
Ccnjl	7.09	3.4	1.06	4.5e-03
Stx1a	150.63	73.77	1.06	3.4e-13
9130024F11Rik	3.72	1.78	1.06	4.7e-02
Gm10605	8.65	4.09	1.06	2.2e-03
Egflam	5.1	2.52	1.06	2.1e-02
Mif	52.79	26.47	1.05	2.1e-09
Hcrtr1	9.62	4.67	1.05	1.2e-03
Rab26	54.89	26.83	1.05	2.6e-10
Atpif1	77.53	37.61	1.05	3.1e-13
Elob	65.08	32.54	1.05	4.6e-11
Nop10	65.27	31.53	1.05	1.9e-12
Wdr83os	17.83	8.71	1.04	1.7e-05
Adamts2	45.19	21.99	1.04	1.8e-10
Phyhip	537.88	262.27	1.04	2.3e-24
Chchd10	152.5	77.51	1.04	1.5e-13
Ppp1r11	155.8	76.35	1.04	1.1e-16
Dph2	26.08	12.71	1.04	3.2e-07
Arxes1	16.98	8.14	1.04	3.2e-05
Plvap	27.52	13.28	1.04	4.1e-07
Spint1	5.07	2.47	1.04	2.2e-02
Hrh1	30.06	14.75	1.03	6.3e-08
Oaz1	40.04	19.89	1.03	6.2e-08
Sema4f	93.34	45.89	1.03	1.0e-12
Gng3	246.51	121.63	1.03	2.7e-20
Hint1	179.85	88.34	1.03	3.8e-15
Ube2ql1	401.27	198.46	1.03	9.7e-21
Myh7	19.83	9.71	1.03	5.7e-06
Rpl37	23.98	12.2	1.03	6.5e-06
Crip2	149.19	74.91	1.02	1.2e-13
Ndufa4	146.86	72.5	1.02	3.2e-13
Gm15487	15.96	7.97	1.02	6.3e-05
Aard	17.77	8.68	1.02	5.1e-05
Cox7c	6.37	3.28	1.02	1.5e-02
Pomc	27.53	13.61	1.02	2.5e-07
Rai1	238.57	120.91	1.02	1.3e-11
Egr3	11.79	5.84	1.01	4.5e-04
Nr4a2	16.3	7.65	1.01	3.0e-04
Nell2	230.41	114.11	1.01	1.6e-20
6330403K07Rik	2675.61	1331.23	1.01	1.0e-21
Mtfp1	95.91	48.23	1.01	1.3e-11
Gm13446	6.21	3.07	1.01	1.4e-02
2310033P09Rik	19.67	10.17	1.01	7.0e-05
Gpr149	38.74	19.23	1	5.8e-09
Edf1	46.96	23.76	1	1.6e-09
Hapln4	172.95	86.43	1	4.5e-16
Pcsk4	8.74	4.6	1	6.7e-03
Snrpn	961.31	480.17	1	2.9e-24
Fabp3	15.52	7.89	1	1.3e-04
Ass1	74.99	37.54	1	5.8e-13
Mrpl36	33.99	17.02	1	3.5e-08
Prss12	4.31	2.13	1	4.9e-02
Samd11	11.51	5.78	1	7.0e-04
Rasal1	143.05	71.83	1	1.2e-15
Calb2	675.57	339.7	1	5.1e-17
Plxdc1	36.67	18.52	1	7.7e-08
Lmx1b	7.43	3.59	1	9.7e-03
Ccdc124	58.23	29.73	1	2.6e-10
Rplp1	181.51	91.93	1	4.5e-13
Bag1	172.07	86.38	0.99	3.7e-18
Tekt5	46.14	23.52	0.99	1.9e-08
Satb2	19.2	9.79	0.99	1.9e-05
Etnk2	49.31	24.81	0.99	3.1e-09
Tesc	11.2	5.7	0.99	1.1e-03
Ndufa7	102.05	52.11	0.98	4.4e-12
Snrpb	107.24	55.19	0.98	1.2e-11
Ubl5	77.83	39.86	0.98	8.7e-11
Fam43b	57.79	30.39	0.98	4.7e-08
Rab40b	23.4	11.8	0.98	7.8e-06
Rhov	41.35	21.23	0.98	5.6e-08
Lhx5	31.33	16.82	0.98	1.3e-05
Rac3	95.64	49.45	0.98	9.0e-11
C3	5.98	3.18	0.98	2.6e-02
Syt5	159.5	82.16	0.98	1.4e-14
Rxrg	75.22	38.06	0.98	2.2e-11
Zfp428	38.15	20.91	0.98	8.4e-06
Trh	126.82	62.71	0.97	1.2e-09
Nxph3	6.63	3.43	0.97	1.5e-02
Bok	38.27	19.82	0.97	9.1e-08
Uqcrq	124.6	65.36	0.97	4.3e-11
Ap2s1	268.63	138.89	0.97	8.9e-15
Myo5b	25.84	12.93	0.97	4.2e-06
Ctxn1	319.61	166.06	0.97	1.8e-15
Habp4	526.51	269.99	0.97	2.1e-19
Nab2	17.09	8.98	0.96	3.0e-04
Slit3	50.59	25.92	0.96	6.7e-10
Gm26805	9.15	4.76	0.96	3.4e-03
Fbxo9	315.9	162.32	0.96	1.7e-17
Rps25	32.13	16.38	0.96	3.6e-07
Tmem163	46.86	23.83	0.96	6.3e-09
Gm1673	39.77	22.26	0.96	1.4e-06
Fkbp1a	725.14	370.42	0.96	5.6e-19
Ankrd34a	151.3	79.39	0.96	1.2e-12
Gpr150	7.61	3.96	0.96	1.0e-02
Cnih3	62.41	31.57	0.96	3.9e-09
Slc6a16	5.51	2.84	0.96	2.7e-02
Arl6ip4	46.34	24.74	0.95	3.1e-07
Gm2464	5.16	2.72	0.95	3.7e-02
Rps7	39.47	20.77	0.95	2.3e-07
1110008P14Rik	47.48	25.47	0.95	3.1e-07
Rps19	67.53	35.51	0.95	4.1e-10
Pcp4	80.45	41.39	0.95	8.9e-12
Scrt2	15.51	8.02	0.95	2.1e-04
Pid1	121.21	62.68	0.94	4.7e-14
Gemin6	4.7	2.49	0.94	4.9e-02
Prr12	282.46	150.88	0.94	2.2e-11
Wdr83	30.53	16.08	0.94	1.9e-06
Calb1	728.36	375.59	0.94	2.4e-20
Gm7964	4.69	2.44	0.94	4.6e-02
Srrm4	172.39	89.85	0.94	2.2e-16
Ptk2b	103.17	54.22	0.94	2.1e-12
Cyb5r1	22.14	11.58	0.93	1.4e-05
Trmt61a	34.59	18.22	0.93	3.1e-07
Naa38	18.61	9.79	0.93	6.7e-05
Rpl39	39.36	20.45	0.93	7.3e-08
Ssbp4	131.17	71.23	0.93	3.7e-10
Angptl6	6.77	3.65	0.93	1.9e-02
Tmem198	29.73	16.18	0.93	1.1e-05
Bex2	492.52	257.86	0.93	5.1e-16
March9	52.16	27.73	0.93	1.3e-08
Rrad	21.65	11.48	0.93	2.7e-05
Polr2i	10.9	5.85	0.92	2.6e-03
Tmem215	10.16	5.28	0.92	3.4e-03
Dctpp1	6.75	3.59	0.92	1.9e-02
Gm14597	7.68	4.06	0.92	1.1e-02
Rps15	207.46	111.13	0.92	4.1e-15
Ube2l6	7.32	3.86	0.92	1.7e-02
Nhp2	18.86	10.2	0.92	1.8e-04
Crtc1	431.7	228.84	0.92	2.7e-18
Praf2	21.84	11.6	0.92	2.8e-05
Sim2	4.93	2.62	0.92	4.5e-02
Ebf3	50.76	25.6	0.92	4.8e-07
Rpl3-ps1	13.79	7.31	0.92	6.4e-04
Rab24	38.85	20.54	0.92	5.2e-07
Spint2	58.17	31.49	0.92	4.6e-08
D630023F18Rik	12.63	6.77	0.91	1.1e-03
Wbp11	211.3	112.49	0.91	3.3e-14
Spata2l	21.71	11.59	0.91	4.0e-05
1700001L19Rik	30.59	16.23	0.91	1.2e-06
Gm2694	8.65	4.62	0.91	1.2e-02
Ndufs5	8.7	4.66	0.91	7.7e-03
Prdx5	219	119.54	0.91	6.5e-11
Ccdc106	18.57	9.97	0.91	1.4e-04
Mn1	92.54	50.34	0.91	8.3e-11
Cox7a2	187.76	99.62	0.91	3.7e-14
Tomm7	56.44	30.22	0.91	5.9e-09
Sstr3	27.02	14.45	0.9	9.9e-06
Fam19a2	90.16	47.79	0.9	3.9e-10
Kctd13	147.89	80.95	0.9	9.0e-11
Pak6	132.5	71.08	0.9	2.6e-13
Krt77	32.51	17.37	0.9	1.0e-06
Sfrp2	8.19	4.39	0.9	9.9e-03
Brd9	81.93	43.96	0.9	3.9e-11
Matk	149.49	81.63	0.9	1.6e-11
Rps28	10.42	5.7	0.9	4.4e-03
Prr7	20.14	12.01	0.9	1.1e-03
Coro1a	97.87	53.63	0.89	1.6e-08
Nr2f6	27.87	16.03	0.89	1.2e-04
Myl12b	207.45	111.98	0.89	3.4e-15
Unc119	98.6	53.23	0.89	7.0e-12
Txn1	100.92	54.24	0.89	7.1e-11
Rpl18	30.34	17.12	0.89	5.2e-05
Tppp3	322.88	177.2	0.89	3.7e-09
Itpa	27.32	14.67	0.89	8.3e-06
Thy1	335.97	183.67	0.89	9.1e-14
Rbm43	61.99	33.38	0.89	1.6e-09
Eef1b2	189.39	101.97	0.89	1.6e-14
Ttc9b	61.6	34.35	0.89	2.9e-07
Nop16	27.34	14.88	0.89	1.9e-05
Rps19bp1	24.53	13.31	0.89	1.9e-05
Tmem9	74.06	40.21	0.89	1.0e-08
Rtl8c	181.95	100.01	0.89	3.3e-12
Rpl38	11.94	6.67	0.89	4.3e-03
Bex3	241.91	131.11	0.89	1.9e-15
Armcx6	9.57	5.17	0.88	6.7e-03
Lrguk	35.53	18.25	0.88	4.3e-05
Tubb2a	640.19	349.44	0.88	1.6e-15
Oxtr	14.77	7.97	0.88	7.6e-04
Fsd1	79.83	43.63	0.88	3.5e-10
Dpysl4	62.66	34.09	0.88	3.4e-08
Nol8	45.98	25.01	0.88	4.9e-08
F730043M19Rik	11.84	6.44	0.88	3.9e-03
Dad1	57.35	31.94	0.88	1.3e-07
Polr2f	34.57	19.61	0.88	2.5e-05
Esyt3	37.64	20.53	0.88	1.2e-06
Smco4	11.81	6.42	0.88	2.5e-03
Larp1b	24.82	13.55	0.88	2.0e-05
Sssca1	32.37	17.98	0.88	8.3e-06
Rps14	193.52	108.78	0.87	1.6e-10
Mgst3	43	23.98	0.87	7.2e-07
Acyp1	10.36	5.58	0.87	6.3e-03
Hs3st2	6.71	3.67	0.87	2.6e-02
Lmna	66.79	37.24	0.87	1.9e-08
Igfbp3	23.17	12.62	0.87	4.2e-05
Ano3	25.25	14	0.87	2.2e-05
Dmrtc1a	23.03	12.65	0.87	4.7e-05
Nr2f2	233.71	127.43	0.87	4.0e-13
Morf4l2	341.29	186.44	0.87	1.2e-16
Tubb3	922.55	514.89	0.87	2.3e-14
Cox6b1	264.41	144.89	0.87	1.5e-15
Homez	46.62	25.38	0.87	1.4e-07
1700037H04Rik	255.63	143.33	0.87	1.4e-11
Scn1b	157.13	87.07	0.87	3.9e-12
Atp6v0e2	418.33	229.65	0.87	3.7e-17
Ankrd34b	182.67	99.36	0.87	1.4e-13
Prpf8	639.93	350.38	0.87	3.5e-17
Il34	27.73	15.28	0.86	1.4e-05
Tubb5	1421.75	786.84	0.86	7.6e-16
Rem2	8.84	4.86	0.86	1.0e-02
Tbca	76.03	41.52	0.86	1.5e-09
Ebf2	7.55	4.16	0.86	1.9e-02
Pdlim7	39.22	22.78	0.86	3.0e-05
Rnaseh2c	23.08	13.3	0.86	5.3e-04
Entpd6	85.57	47.18	0.86	2.5e-10
Rpl22l1	16.2	8.89	0.86	5.7e-04
Ly6h	246.15	140.83	0.86	1.1e-11
Zfp239	91.53	50.7	0.86	8.2e-11
Rbmxl1	13.56	7.47	0.86	1.6e-03
Arxes2	57.12	30.92	0.86	6.6e-08
Hs3st5	23.63	12.99	0.86	6.5e-05
Mrps12	57.33	32.32	0.86	2.4e-07
Izumo4	23.55	12.99	0.86	4.6e-05
Rpl41	76.96	43.28	0.86	3.6e-08
Tmem28	72.93	40.33	0.86	4.0e-09
Mrpl20	40.45	22.32	0.86	4.7e-07
Hspbp1	161.38	91.04	0.86	2.0e-10
Ddn	123.69	68.13	0.86	3.5e-11
Ntng1	55.68	30.64	0.86	6.0e-08
Ncdn	2320.19	1298.12	0.85	1.6e-14
Chst1	198.3	109.71	0.85	2.9e-14
Rpl27a	61.2	33.83	0.85	6.3e-09
Uqcrb	25.55	14.11	0.85	2.6e-05
Rprm	37	20.92	0.85	1.0e-05
Cox14	83.38	46.78	0.85	1.0e-07
Mpnd	132.14	73.76	0.85	2.0e-11
Rps3a1	75.55	41.56	0.85	3.8e-09
Ankrd33b	9.97	5.58	0.85	7.2e-03
Fnta	159.62	88.75	0.85	4.0e-13
Prrt1	77.58	44.33	0.85	1.1e-08
Zfp553	58.61	32.71	0.85	3.0e-08
Ets2	313.05	173.46	0.85	8.9e-15
Cxxc1	66.57	37.07	0.85	1.5e-08
Hras	155.1	87.16	0.85	1.6e-10
Sowaha	57.93	32.33	0.85	3.4e-08
Rpl28	12.22	6.85	0.85	3.2e-03
Surf2	39.28	21.87	0.84	7.9e-07
Chchd2	106.28	59.1	0.84	2.6e-10
Cox5a	150.1	83.2	0.84	2.5e-11
Zcchc12	1017.51	566.45	0.84	2.4e-17
Necab2	97.02	54.9	0.84	2.0e-08
Znhit1	48.39	27.51	0.84	7.7e-07
Ubl4a	151.03	84.15	0.84	7.6e-13
Kcnab1	123.82	68.82	0.84	6.5e-12
Ajap1	61.89	35.05	0.84	7.2e-08
Tceal6	72.5	40.39	0.84	2.1e-09
Mrpl34	33.19	18.91	0.84	8.3e-06
Mien1	33.09	18.35	0.84	1.5e-05
Eno3	8.41	4.72	0.84	1.5e-02
Rpl23	36.82	20.53	0.84	1.7e-06
Khdrbs1	261.67	145.63	0.84	2.9e-13
Iscu	94.81	53.98	0.84	1.8e-09
Ndfip1	415.96	232.75	0.84	1.6e-15
Atox1	52.1	29.25	0.84	9.8e-08
Rps8	48.09	26.95	0.84	1.6e-07
Fam131a	218.09	123.23	0.84	3.0e-10
Snrnp25	11.53	6.48	0.84	5.3e-03
Brd3os	60.21	33.71	0.84	9.0e-08
Gpx3	247.07	139.64	0.84	1.5e-12
Mrpl54	22.37	13.07	0.84	4.3e-04
Uqcrh	145	81.22	0.83	1.6e-11
Cstb	27.7	15.64	0.83	1.2e-04
Tmem132a	54.62	31.01	0.83	1.1e-07
Atp5d	254.79	147.44	0.83	1.4e-10
Mettl26	66.4	37.84	0.83	1.4e-07
Rps18	19.22	10.8	0.83	2.8e-04
Icam5	24.94	14.03	0.83	5.1e-05
Nefm	174.65	98.5	0.83	5.5e-12
Polr2e	50.75	28.96	0.83	9.7e-07
Rpp21	20.65	11.96	0.83	7.1e-04
Atp5k	10.21	5.73	0.83	7.8e-03
Klhdc8a	99.2	56.63	0.83	2.7e-09
Zcchc17	125.56	70.73	0.83	2.2e-10
Impdh1	81.17	45.94	0.83	5.1e-08
Mrps14	58.32	32.59	0.83	2.5e-07
Cdh13	133.57	74.69	0.83	8.9e-11
Nedd8	129.03	72.91	0.83	2.9e-11
Svop	201.4	114.25	0.83	2.7e-12
Adgra1	130.21	73.31	0.83	4.6e-11
Rrp7a	110.52	62.49	0.83	8.3e-11
Snrpa	46.06	26.31	0.83	1.6e-06
Ngb	217.26	124.08	0.83	2.8e-10
Atp5g3	456.94	256.22	0.83	4.0e-12
Nme1	122.29	68.95	0.82	4.6e-11
Tprgl	349.65	197.65	0.82	4.9e-14
Aip	167.45	95.09	0.82	1.1e-11
Pcdhga9	7.55	4.26	0.82	2.9e-02
Gng13	9.92	5.71	0.82	1.1e-02
Mrpl14	29.54	17.31	0.82	2.7e-04
Cacnb3	224.36	127.76	0.82	1.6e-12
A430005L14Rik	27.16	15.42	0.82	7.3e-05
Shisa2	12.42	7.03	0.82	4.1e-03
E430024P14Rik	14.46	8.22	0.82	2.2e-03
Ak5	146.14	82.77	0.82	4.7e-12
Fbxw7	198.53	111.14	0.82	1.1e-12
Ubald1	101.76	59.44	0.82	7.8e-08
Chrm3	29.24	16.35	0.82	3.2e-05
Atp1a1	345.87	196.16	0.82	1.3e-14
Galnt17	105.73	59.95	0.82	1.1e-10
Ntsr1	22.69	12.84	0.82	1.4e-04
Rplp2	86.6	49.6	0.82	6.0e-09
Josd1	85.44	48.17	0.82	1.3e-08
Pvalb	10.63	6.29	0.82	2.1e-02
H1fx	35.39	21.42	0.82	1.5e-04
Susd2	34.18	19.44	0.81	6.8e-06
Pcdhga5	6.78	3.92	0.81	4.8e-02
Pgrmc1	425.61	243.88	0.81	1.2e-13
Mrpl55	22.48	12.88	0.81	2.1e-04
Hnf1b	7.22	4.09	0.81	3.2e-02
Cabp1	28.59	16.55	0.81	4.8e-05
Adam15	36.58	21.16	0.81	1.0e-05
Chpf	106.89	62.53	0.81	1.4e-08
Fam133b	40.55	22.66	0.81	8.6e-06
Pi16	14.2	8.27	0.81	3.0e-03
Ctxn2	58.48	33.37	0.81	5.9e-08
Resp18	274.13	156.32	0.81	7.6e-14
Grcc10	23.26	13.5	0.81	1.7e-04
Ypel3	215.86	125.12	0.81	3.1e-11
Cby1	45.74	26.67	0.81	8.1e-06
Macrod1	22.18	12.91	0.81	5.9e-04
AC121965.1	44.91	25.78	0.81	1.8e-06
Alkbh7	30.38	17.55	0.81	3.2e-05
Ldha	229.69	132.19	0.81	3.7e-12
Cmss1	13.65	7.78	0.8	3.1e-03
Egr4	8.82	5.14	0.8	1.9e-02
Ly6e	82.99	47.78	0.8	5.6e-09
Krtcap2	34.85	20.22	0.8	2.3e-05
Fam241b	64.17	37.18	0.8	2.3e-07
Cend1	403.1	232.93	0.8	3.4e-13
Gm9866	91.23	52.74	0.8	2.1e-09
Sema6b	123.64	71.58	0.8	1.9e-10
Chac1	20.06	11.63	0.8	5.5e-04
Scamp3	29.66	17.22	0.8	4.1e-05
Ccdc137	45.68	26.26	0.8	9.1e-07
Mrpl22	10.59	6.09	0.8	9.1e-03
Timm13	45.53	26.6	0.8	7.3e-06
Efcab10	6.46	3.68	0.8	4.5e-02
H2afz	8.52	5.03	0.8	2.7e-02
Hn1	119.07	68.98	0.8	8.2e-10
Sqstm1	1154.49	671.56	0.8	1.3e-12
Ap1s1	292.74	168.3	0.8	5.3e-11
Mapk3	315.33	181.56	0.8	2.4e-13
Cited4	9.48	5.96	0.8	2.6e-02
Amigo2	95.45	54.47	0.8	3.4e-09
Tmem160	20.2	12.65	0.8	4.2e-03
Rps21	61.47	36.3	0.8	5.0e-06
Zcchc18	1066.36	613.14	0.8	8.6e-16
Tpbg	18.85	10.84	0.8	5.9e-04
Gm13205	12.59	7.41	0.8	7.4e-03
Mrps28	13.74	8.16	0.8	6.0e-03
Pop5	35.23	20.36	0.8	1.4e-05
Snca	112.6	64.89	0.8	8.0e-08
Sox3	6.91	4.03	0.8	4.8e-02
Mdga1	85.47	49.42	0.8	5.1e-09
Trp53i11	161.38	92.82	0.8	1.1e-11
Gm6472	31.64	18.08	0.8	6.7e-05
Rps11	100.42	58.06	0.79	8.4e-10
Ppfia4	278.89	162.09	0.79	9.6e-12
Car10	180.95	103.59	0.79	1.5e-10
Thra	1236.05	717.38	0.79	1.2e-13
Sh3bgrl3	62.56	37.21	0.79	2.2e-06
Tmem179	259.05	151.03	0.79	5.8e-11
Kcnip1	182.48	105.13	0.79	1.6e-11
Atp5j	82.7	48.35	0.79	2.9e-08
Rps16	18.85	11.42	0.79	1.7e-03
Klc2	433.55	254.54	0.79	5.6e-11
Cenpv	25.08	14.49	0.79	1.3e-04
Noct	100.81	58.36	0.79	7.2e-09
Srsf2	111.81	64.85	0.79	6.7e-09
Vps72	45.91	26.89	0.79	6.4e-06
Nfil3	20.29	11.78	0.79	4.9e-04
Pebp1	132.31	77.83	0.79	6.9e-09
Fbxl15	21.38	13.51	0.79	3.0e-03
Bola1	9.98	6.18	0.79	2.2e-02
Arf5	175.87	105.15	0.79	5.1e-08
Junb	31.82	18.93	0.79	6.1e-05
Dohh	33.8	20.31	0.79	1.6e-04
Sdhaf4	27.34	15.76	0.79	8.2e-05
Arhgdig	131.14	77.64	0.79	8.0e-09
Igsf8	149.79	88.74	0.79	2.4e-09
Jakmip1	139.9	81.7	0.79	2.2e-09
Snx16	50.05	28.74	0.78	9.6e-07
Zrsr1	149.15	86.57	0.78	3.3e-11
Snrpd2	40.43	23.95	0.78	2.7e-05
Ndufb6	45.67	26.34	0.78	2.3e-05
Cd3eap	26.03	15.13	0.78	1.0e-04
6820408C15Rik	7.72	4.46	0.78	3.5e-02
Itm2c	601.16	354.61	0.78	5.1e-11
Pcsk1	66.62	39.16	0.78	4.2e-07
Arl2	119.45	70.94	0.78	1.7e-08
Cenpt	18.51	10.8	0.78	9.2e-04
C530005A16Rik	9.13	5.34	0.78	1.8e-02
Selenoh	32.69	19.29	0.78	1.3e-04
Pnmal1	559.06	325.17	0.78	1.2e-14
Ccdc85b	60	38.17	0.78	8.2e-05
Ten1	27.24	16.1	0.78	3.5e-04
Ctu1	28.28	16.86	0.78	2.6e-04
Ccne1	13.45	7.87	0.78	4.5e-03
Cdadc1	111.68	66.11	0.78	1.6e-08
Sertm1	45.42	26.58	0.78	3.4e-06
Rbfox3	240	141.4	0.78	7.7e-11
Nefl	456.51	267.95	0.78	6.7e-14
BC037034	112.44	66.14	0.78	2.5e-09
Sncb	471.64	280.67	0.78	4.2e-11
Rp9	56.04	32.79	0.78	4.9e-07
Tlnrd1	81.86	49.39	0.78	5.8e-07
Erc2	251.01	145.65	0.78	2.5e-12
Crlf2	14.1	8.4	0.77	4.3e-03
Zbtb17	34.91	20.62	0.77	5.6e-05
Camkk2	168.84	98.48	0.77	3.3e-11
Mycn	9.81	5.78	0.77	1.6e-02
Chga	144.68	84.83	0.77	9.6e-11
Pld3	376.87	221.62	0.77	2.6e-13
Mrpl12	57.34	33.94	0.77	1.6e-06
Prkch	10.19	5.94	0.77	1.5e-02
Hpca	255.43	150.5	0.77	2.0e-12
2410002F23Rik	84.45	49.59	0.77	1.2e-08
Zbtb7c	47.92	28.09	0.77	1.4e-06
Lynx1	396.65	232.97	0.77	1.3e-13
Dynll1	180.19	105.83	0.77	2.7e-10
Atp6v1f	82.48	48.68	0.77	6.8e-08
Ssna1	40.69	24.3	0.77	5.7e-05
Magee1	556.4	327.64	0.77	5.9e-14
Mrps16	37.68	22.26	0.77	3.1e-05
Coro6	7.47	4.36	0.77	3.9e-02
Atp5o	206.06	121.39	0.77	1.9e-11
Flywch1	900.38	539.61	0.77	1.9e-11
Bloc1s4	14.72	9.19	0.77	9.6e-03
Igsf21	27.57	16.99	0.77	6.8e-04
Camk2n2	257.02	154.57	0.77	1.2e-10
Mrpl41	66.95	39.71	0.76	1.0e-06
2010107E04Rik	67.93	39.72	0.76	2.9e-07
Cyb561	97.86	57.68	0.76	4.9e-09
Gabra5	100.78	59.44	0.76	3.2e-09
Map1lc3a	250.91	153.83	0.76	4.8e-08
Hcfc1r1	76.93	45.91	0.76	4.3e-07
Trappc2l	68.84	40.74	0.76	2.8e-07
9430015G10Rik	12.32	7.26	0.76	7.4e-03
Lrrc24	13.15	7.89	0.76	6.8e-03
Itpr1	411.34	242.68	0.76	1.7e-13
BC029722	100.92	59.89	0.76	5.7e-09
Ndufb7	31.68	18.72	0.76	4.8e-05
Actn2	10.91	6.43	0.76	1.4e-02
Extl1	26.54	15.68	0.76	1.8e-04
Ier3	8.68	5.24	0.76	3.0e-02
Ak6	10.3	6.13	0.76	1.5e-02
Pfdn6	33.41	19.84	0.76	5.4e-05
Atp6v1g2	529.4	313.2	0.76	1.0e-12
Nme5	14	8.3	0.76	4.5e-03
Tmem145	31.82	18.89	0.76	6.0e-05
Atp6v1e1	508.07	299.75	0.76	1.2e-13
Zfp575	16.48	9.76	0.76	2.2e-03
Phf1	122.93	73.03	0.76	9.6e-10
Klhl7	187.76	109.93	0.76	1.2e-10
Rnf219	37.68	22.02	0.76	2.2e-05
Pam	451.76	267.08	0.76	1.5e-13
Psmd3	253.29	150.99	0.76	2.2e-11
Cdip1	737.94	436.2	0.76	3.1e-14
Gpx1	94.26	57.72	0.76	3.8e-06
3110040N11Rik	16.42	9.73	0.76	2.3e-03
Dctn3	108.1	64.15	0.76	5.6e-09
Cox8a	205.7	124.9	0.76	6.4e-10
Rps26	35.32	21.32	0.76	7.2e-05
Fam216a	43.13	25.54	0.76	5.4e-06
Hint2	27.31	16.35	0.75	2.5e-04
G3bp2	424.48	250.78	0.75	6.9e-13
Ndufs7	131.68	81.44	0.75	6.4e-07
Cox7b	133.77	79.28	0.75	5.0e-10
Rpl37a	31.93	18.86	0.75	7.8e-05
Fam69b	35.32	21.25	0.75	8.3e-05
Snx15	46.54	28.43	0.75	4.1e-05
Cox5b	53.33	32.09	0.75	2.7e-06
Bex1	121.5	72.35	0.75	5.0e-09
Tenm2	193.99	115.44	0.75	4.4e-11
Banf1	50.66	30.17	0.75	2.7e-06
Stub1	110.92	68.73	0.75	1.7e-06
Cptp	62.81	37.37	0.75	3.6e-07
Stac2	28.46	16.93	0.75	1.2e-04
Cacnb1	233.61	140.43	0.75	5.0e-10
Ndufs6	39.86	23.75	0.75	1.5e-05
Atg16l2	17.53	10.42	0.75	2.0e-03
BC022687	30.39	18.21	0.75	1.7e-04
Lyrm1	16.19	9.7	0.75	2.9e-03
Ppdpf	30.62	19	0.75	5.5e-04
Cbx4	81.85	49.26	0.75	2.2e-07
Higd2a	86.37	52.11	0.75	1.7e-07
Smarcd3	95.98	58.32	0.75	3.4e-07
Eno2	1947.15	1164.37	0.75	1.2e-12
Enc1	548.14	326.49	0.75	2.0e-13
Mpc2	76.49	46.72	0.75	7.2e-06
Tuba1b	106.21	63.29	0.75	1.9e-08
Tmem25	31.96	19.13	0.75	7.6e-05
Arhgap36	228.67	136.4	0.75	1.6e-11
Gm13889	37.79	23.57	0.75	2.3e-04
Pop7	28.83	17.69	0.74	6.2e-04
Mlf2	542.65	328.05	0.74	5.3e-11
Epdr1	117.37	69.88	0.74	1.4e-08
Stk32c	185.12	111.87	0.74	4.5e-09
Stmn3	715.92	440.94	0.74	1.4e-09
Rpl8	455.03	278.12	0.74	8.5e-10
Zfp444	90.04	54.18	0.74	6.0e-08
Vstm5	24.75	14.81	0.74	3.3e-04
Mrpl27	26.08	15.6	0.74	2.6e-04
Fank1	16.71	10	0.74	2.5e-03
Prss36	7.71	4.66	0.74	4.4e-02
Becn1	136.93	81.77	0.74	1.3e-09
Akr7a5	47.53	29.44	0.74	3.3e-05
Tmem14c	30.1	18.25	0.74	3.3e-04
Tomm34	179.21	107.03	0.74	3.5e-10
Cactin	43.95	26.82	0.74	3.0e-05
Scand1	23.69	15.72	0.74	1.9e-03
1500009C09Rik	192.7	117.06	0.74	1.1e-08
Mtch1	1029	626.39	0.74	3.8e-11
Spcs1	59.49	35.63	0.74	6.9e-07
Ckmt1	435.87	262.62	0.74	2.5e-10
Mfsd12	25.08	15.05	0.74	3.2e-04
Rpl14	78.43	46.92	0.74	1.3e-07
Mmp17	85.2	51.13	0.74	4.1e-08
2900011O08Rik	452.88	271.39	0.74	6.4e-13
Rps10	25.88	15.82	0.74	5.4e-04
Plch2	56.25	34.18	0.74	4.7e-06
H2-T22	10.66	6.33	0.74	2.0e-02
Tmem91	45.85	27.91	0.74	2.0e-05
Rps6ka4	72.58	43.8	0.74	8.0e-07
Kcnj12	20.53	12.32	0.74	9.9e-04
Tagln3	290.32	174.75	0.74	5.4e-11
Cdkl4	26.31	15.95	0.74	3.6e-04
Cx3cl1	211.08	127.08	0.74	2.2e-10
Abhd8	503.22	311.68	0.74	3.4e-09
Rps5	416.37	251.46	0.74	6.3e-11
Raly	132.62	80.06	0.74	2.4e-08
1110004E09Rik	25.22	15.22	0.73	4.6e-04
Gfra4	63.48	38.89	0.73	4.6e-06
Gstm4	26.86	16.12	0.73	3.0e-04
Myl6	55.21	33.35	0.73	2.6e-06
Tmsb10	10.69	6.56	0.73	2.0e-02
Gck	45.85	27.64	0.73	8.1e-06
Grina	247.19	150.04	0.73	1.2e-10
Sybu	204.62	122.95	0.73	6.9e-10
Khdrbs2	27.54	16.41	0.73	5.8e-04
Galnt18	22.54	13.54	0.73	6.8e-04
Reep2	89.44	54.21	0.73	1.1e-07
Bod1	123.03	74.07	0.73	1.2e-07
Syngr3	201.66	122	0.73	1.3e-10
Romo1	20.98	13.75	0.73	5.1e-03
Grin1	154.54	94.24	0.73	4.0e-09
Rnf112	235.11	141.7	0.73	1.6e-09
Coprs	88.19	53.67	0.73	5.9e-07
Eif2b5	129.86	78.47	0.73	3.1e-09
Mrps11	24.78	15.08	0.73	7.4e-04
Blcap	306.89	185.46	0.73	1.0e-10
Rgs4	265.48	160.89	0.73	5.1e-11
Emc10	122.48	75.73	0.73	1.9e-07
Asb16	33.14	20	0.73	6.9e-05
Gskip	90.89	54.58	0.73	4.9e-08
Tada3	47.05	28.93	0.73	3.8e-05
Pnmal2	2480.45	1506.62	0.73	1.0e-12
Rbfa	33.55	20.78	0.73	2.7e-04
Syp	435.15	265.29	0.73	4.4e-11
Hsf4	39.78	24.8	0.73	1.1e-04
Smim12	33.75	20.74	0.73	2.2e-04
Hsf2	47.73	28.8	0.73	6.0e-06
Rpl7	89.24	54.16	0.73	7.5e-08
Prkg2	20.37	12.36	0.73	1.3e-03
Rab3a	1000.14	610.91	0.72	1.0e-11
Tceal9	142.44	85.02	0.72	4.3e-08
Arpc3	65.39	39.63	0.72	8.0e-07
Atp1a3	1946.62	1188.85	0.72	4.7e-12
Rrs1	24.16	14.79	0.72	8.4e-04
Hrh3	77.67	48.71	0.72	1.5e-05
Fam189b	32.71	20.14	0.72	2.5e-04
Gtpbp3	43.42	26.55	0.72	6.7e-05
Ppp1r35	19.53	12.72	0.72	5.8e-03
Trir	77.66	47.65	0.72	9.6e-07
H2afx	32.01	19.55	0.72	1.2e-04
Pdap1	55.86	33.82	0.72	7.1e-06
Efnb1	16.67	10.24	0.72	4.5e-03
Lmo3	264.53	155.2	0.72	1.6e-08
Chrm1	23.96	14.42	0.72	1.0e-03
Isyna1	106.48	66.4	0.72	9.2e-07
Cisd3	18.31	11.27	0.72	3.3e-03
Commd4	33.41	20.38	0.72	1.2e-04
Ndufb5	133.96	81.33	0.72	2.9e-09
Tcerg1l	55.31	33.6	0.72	2.3e-06
Gm47163	51.12	31.44	0.72	9.9e-06
Tmem268	27.19	16.55	0.72	3.3e-04
Fam131c	21.35	13.57	0.72	3.3e-03
Mrpl49	57.26	34.83	0.72	1.9e-06
Scg2	481.33	291.55	0.72	2.2e-11
Slc9a5	29.5	17.95	0.72	1.9e-04
Tceal3	154.79	93.74	0.72	6.5e-09
Babam1	121.88	75.05	0.72	1.4e-07
Irf2bp1	152.86	95.68	0.72	2.8e-07
Atp1b1	727.28	441.85	0.72	6.7e-13
Rbfox1	341.94	206.92	0.72	5.7e-11
Fam13b	269.79	165.61	0.72	2.9e-10
Ndufb4	12.86	7.81	0.72	1.0e-02
Naa20	35.59	21.62	0.72	5.6e-05
Ethe1	23.27	14.26	0.72	9.7e-04
Nupl2	16.89	10.28	0.72	3.4e-03
Ndufb3	31.78	19.42	0.72	1.7e-04
Cox4i1	283.87	173.54	0.72	2.4e-10
Trappc4	67.37	41.03	0.72	6.4e-07
AI413582	32.65	20.47	0.72	4.1e-04
Irf2bpl	185.74	116.98	0.72	2.0e-07
Mypop	46.55	28.95	0.72	1.2e-04
Chrna4	61.46	37.48	0.72	1.3e-06
Plppr2	109.02	66.97	0.72	7.8e-08
Scn5a	50.48	30.76	0.71	6.4e-06
Ube2a	54.06	33.12	0.71	3.7e-06
Ap4s1	63.21	38.37	0.71	1.4e-06
Chmp4b	284.69	173.62	0.71	2.0e-10
Cebpzos	13.61	8.12	0.71	1.6e-02
Sdr39u1	43.25	26.7	0.71	3.8e-05
Caly	186.17	115.82	0.71	2.1e-08
Klf16	70.11	43.15	0.71	3.5e-06
Mea1	76	46.85	0.71	1.5e-06
Prelid1	92.06	58.36	0.71	6.3e-06
Fam173a	48	29.99	0.71	3.5e-05
Lysmd2	78.32	48.26	0.71	7.9e-06
Wdr54	17.27	10.53	0.71	3.5e-03
Cited2	66.98	40.97	0.71	1.3e-05
Srrm3	65.78	40.86	0.71	3.2e-06
Timm17b	34.92	21.51	0.71	1.0e-04
Cox6c	126.26	77.05	0.71	2.9e-08
Rpl3	16.89	10.12	0.71	2.1e-02
Jakmip2	119.33	72.81	0.71	1.0e-08
Skp1a	592.77	360.75	0.71	4.0e-12
Ifitm10	35.53	22.3	0.71	1.6e-04
Cpne6	180.05	110.88	0.71	8.5e-09
Mrpl13	65.14	39.4	0.71	4.6e-06
Mir22hg	14.97	9.06	0.71	7.6e-03
Rpl4	698.16	427.15	0.71	1.5e-12
Rbm28	53.09	32.28	0.71	7.0e-06
Cinp	45.3	27.69	0.71	1.4e-05
Borcs8	26.65	16.32	0.71	4.0e-04
Dclk3	47.04	28.79	0.71	1.1e-05
Ccdc160	10.4	6.35	0.71	2.3e-02
Mrpl52	22.67	13.85	0.71	9.6e-04
Prkar1b	1630.41	1006.81	0.71	3.1e-11
Rnf19b	97.41	59.68	0.71	5.6e-08
Mllt11	495.19	302.61	0.71	5.3e-11
Kcnab2	380.96	235.19	0.71	3.0e-10
Eif3m	75.52	46.17	0.71	3.8e-07
Atp5e	93.9	58.27	0.71	9.7e-06
Fkbp1b	17.77	10.89	0.71	4.4e-03
Aen	42.9	26.31	0.71	4.1e-05
Glrx	45.2	27.58	0.71	1.9e-05
Stoml2	38.18	23.39	0.71	9.5e-05
Tuba4a	569.82	351.31	0.71	1.5e-10
Rpl35a	36.33	22.26	0.71	6.7e-05
Prelid3a	60.52	37.18	0.71	1.3e-05
Ndufb8	107.74	67.09	0.71	4.6e-07
H2afy2	25.73	16	0.71	7.3e-04
Ccdc107	8.91	5.52	0.7	3.9e-02
Dand5	9.37	5.75	0.7	3.3e-02
Ube2g2	58.9	36.32	0.7	6.8e-06
Znhit3	24.83	15.17	0.7	7.7e-04
Brk1	163.86	100.77	0.7	3.9e-09
Nsg1	421.93	259.83	0.7	3.1e-11
Txndc17	35.78	22.02	0.7	8.5e-05
Taf11	57.37	35.17	0.7	4.0e-06
Dcaf4	38.45	23.63	0.7	5.2e-05
Eif5a	270.41	167.63	0.7	3.2e-08
Tfpt	22.34	13.85	0.7	1.4e-03
Pithd1	268.77	165.53	0.7	5.0e-10
Nol4	218.2	133.39	0.7	1.4e-09
Cited1	36.4	22.5	0.7	8.3e-05
Avpi1	18.71	11.61	0.7	3.1e-03
Btbd19	18.65	11.43	0.7	3.9e-03
Prdx2	250.81	154.85	0.7	3.3e-09
Pqlc1	21.26	13.12	0.7	1.6e-03
Hmga1	19.48	12.17	0.7	2.7e-03
Srp14	110.44	68.02	0.7	9.1e-08
Amn	8.51	5.29	0.7	4.7e-02
Znrd1	11.86	7.33	0.7	1.9e-02
Ndufa1	39.6	24.66	0.7	1.3e-04
Ssu72	73.61	45.48	0.7	1.4e-06
Mrap2	39.62	24.42	0.7	6.0e-05
Slc26a11	9.06	5.57	0.7	3.8e-02
Actn1	53.14	32.65	0.7	7.9e-06
Rnf6	118.48	72.62	0.7	7.3e-08
Bahd1	68.3	42.37	0.7	4.0e-06
Slc25a22	349.32	217.29	0.7	1.2e-09
Vdac1	697.89	430.35	0.7	5.3e-12
Egln2	124.74	79.28	0.7	2.6e-06
Pfdn5	93.91	58.56	0.7	5.2e-07
Ndufa6	96.21	59.36	0.7	7.6e-07
Adar	536.17	331.15	0.7	9.7e-12
Mrps21	13.77	8.62	0.7	1.3e-02
Pard6a	25.69	16.1	0.69	9.3e-04
Dynlrb1	97.28	60.6	0.69	4.9e-07
Mrps26	67.01	42.03	0.69	7.3e-06
Ppp2r5b	272.43	169.13	0.69	4.4e-10
Lor	21.78	13.9	0.69	2.8e-03
Tmem208	10.2	6.3	0.69	2.9e-02
Pld5	41.85	25.86	0.69	3.7e-05
Ssb	94.82	58.41	0.69	1.3e-07
Yipf1	28.45	17.62	0.69	4.1e-04
Pcsk2	185.53	114.73	0.69	1.6e-09
Arfrp1	45.24	27.84	0.69	3.0e-05
Cyth2	72.49	44.83	0.69	1.3e-06
Wdr55	13.05	8.11	0.69	1.4e-02
Rangap1	572.19	356.47	0.69	9.5e-10
Stk25	345.81	214.48	0.69	6.4e-10
Fgfr1	103.8	64.35	0.69	9.1e-08
Pusl1	13.86	8.66	0.69	1.1e-02
Mettl22	27.76	17.43	0.69	1.0e-03
Prr13	70.25	43.79	0.69	2.6e-06
Caprin1	529.19	326.83	0.69	2.0e-11
Calm2	917.36	562.51	0.69	1.6e-10
Efna3	23.92	14.88	0.69	1.1e-03
Sumo3	202.59	125.42	0.69	1.2e-09
Tmem14a	16.33	10.14	0.69	7.3e-03
Nptx1	213.89	131.03	0.69	5.4e-06
Rtl8b	94.39	58.68	0.69	3.8e-07
Tubb4b	234.57	146.72	0.69	4.8e-08
Arf1	293.62	183.08	0.69	1.3e-08
Prnp	425.2	263.51	0.69	3.9e-11
Mapre3	372.31	232.57	0.69	1.5e-09
Mrps34	16.5	10.6	0.69	7.4e-03
Crhbp	13.06	8.12	0.69	1.4e-02
Cap2	191.82	119.39	0.69	2.2e-09
Nsg2	705.57	438.17	0.69	1.2e-11
Rps24	70.48	43.81	0.69	1.5e-06
Phf13	53.51	33.3	0.69	1.4e-05
Glra1	38.27	23.87	0.69	8.6e-05
Eef1akmt1	20.54	12.74	0.69	2.2e-03
Rnf185	74.93	46.43	0.69	1.1e-06
Pmvk	53.89	33.56	0.69	9.6e-06
Them6	26.95	17.46	0.69	2.4e-03
Aplp1	832.6	524.46	0.69	5.3e-10
Ccdc115	15.13	9.41	0.69	8.5e-03
Bysl	43.09	26.81	0.69	4.0e-05
Kctd17	103.9	65.08	0.69	5.9e-07
Fam19a1	25.26	15.64	0.69	8.3e-04
Frat1	49.92	31.52	0.69	6.8e-05
Tsen34	65.57	42.52	0.69	7.9e-05
Naa60	110.66	68.85	0.69	6.4e-08
Galnt16	259.58	161.15	0.69	2.0e-09
Rgl1	243.64	151.61	0.68	4.7e-10
Tm2d3	35.61	22.31	0.68	1.8e-04
Gm15631	20.18	12.7	0.68	3.4e-03
Cox7a2l	110.35	68.65	0.68	6.9e-08
Hist1h3e	13.18	9.2	0.68	3.5e-02
Coil	35.64	22.17	0.68	1.8e-04
Timm22	60.31	37.71	0.68	8.3e-06
Zfp653	13.94	8.77	0.68	1.3e-02
Polr2g	73.09	45.52	0.68	1.2e-06
Akt1	343.24	216.06	0.68	3.0e-09
Rap2b	67.25	41.8	0.68	2.2e-06
Gpank1	12.29	7.72	0.68	1.9e-02
P4htm	53.68	33.71	0.68	1.4e-05
Acd	45.57	28.64	0.68	6.6e-05
Hipk4	39.42	24.64	0.68	7.8e-05
Nup98	114.05	71.39	0.68	8.3e-08
Pdxp	187.22	118.61	0.68	3.6e-08
Cdh22	71.75	46.41	0.68	4.0e-05
Unc5a	63.91	40.27	0.68	7.0e-06
Map2k1	539.53	335.85	0.68	3.1e-10
Ndufa11	86.6	56.68	0.68	2.8e-05
Bex4	9.53	5.94	0.68	3.8e-02
Magoh	21.71	13.45	0.68	4.3e-03
Plekhj1	28.47	18.07	0.68	1.1e-03
AI837181	86.51	54.92	0.68	4.0e-06
Ociad2	60.04	37.53	0.68	5.4e-06
Rxrb	103.8	65.43	0.68	3.0e-07
Mrpl28	60.91	38.51	0.68	2.6e-05
Slc30a9	399	250.41	0.68	2.0e-10
Tmem120a	10.88	6.85	0.68	2.8e-02
Fndc9	38.54	24.18	0.68	1.5e-04
Pa2g4	101.24	62.95	0.68	4.6e-07
Dtd1	122.86	76.97	0.68	1.1e-07
Larp7	20.94	12.96	0.68	3.5e-03
Hspa8	288.95	181.6	0.67	4.5e-10
Lin7b	28.38	18.43	0.67	2.0e-03
Gas8	16.54	10.4	0.67	7.1e-03
Pcbd2	11.39	7.29	0.67	3.6e-02
Zfp146	43.52	27.34	0.67	4.9e-05
Anapc5	239.75	150.43	0.67	1.5e-09
Kctd2	111.75	70.22	0.67	1.2e-07
Dgkg	151.14	94.85	0.67	1.5e-08
Bud23	30.85	19.5	0.67	7.5e-04
Lyrm4	43.07	26.94	0.67	7.0e-05
Arpc4	156.89	98.72	0.67	8.0e-08
Abhd11	32.7	20.77	0.67	4.8e-04
Ggact	25.91	16.48	0.67	1.6e-03
Aprt	35.43	22.41	0.67	2.7e-04
Efhd2	290.23	185.78	0.67	2.5e-08
Sf3b4	25.67	16.18	0.67	2.4e-03
Rpl6	42.11	26.7	0.67	1.2e-04
Vps37d	42.24	27.69	0.67	6.6e-04
Ino80b	17.69	11.95	0.67	1.5e-02
Fam81a	142.01	90	0.67	4.2e-08
Rpl32	96.24	60.49	0.67	5.5e-07
Ndufc1	56.95	35.77	0.67	5.6e-05
Snrpe	19.39	12.25	0.67	3.8e-03
Sf3a2	41.72	26.88	0.67	2.7e-04
Serp2	95.45	61.59	0.67	1.5e-05
Nucb1	82.36	51.94	0.67	1.2e-06
Zfp341	11.66	7.3	0.67	2.8e-02
Cacna2d1	288.17	185.56	0.67	1.4e-08
Lrp11	127.19	80.03	0.67	6.0e-08
Cdh4	78.41	49.55	0.67	1.7e-06
Mlx	29.32	18.38	0.67	6.5e-04
Elof1	92.49	58.37	0.67	5.9e-07
Tro	487	306.94	0.67	8.9e-11
Agap2	687.99	436.3	0.67	3.2e-10
Rad9a	15.5	9.75	0.67	1.1e-02
Ranbp1	67.74	42.83	0.66	9.9e-06
Khnyn	66.69	42	0.66	5.7e-06
Lrrtm1	59.28	37.65	0.66	2.1e-05
Ak4	99.03	62.37	0.66	3.1e-07
Cfl1	554.01	351.81	0.66	7.7e-09
Npdc1	142.79	93.03	0.66	4.4e-06
Paxx	34.27	21.83	0.66	4.5e-04
Tuba1a	226.79	142.46	0.66	3.9e-09
Syn1	681.69	431.34	0.66	4.5e-10
Ubb	316.74	201.73	0.66	3.2e-09
Ppfia2	202.58	128.56	0.66	6.3e-09
Eml2	450.29	290.94	0.66	4.0e-08
Ndufa8	131.55	84.14	0.66	1.6e-06
Spats2l	69.99	43.92	0.66	1.4e-05
2210016L21Rik	199.54	127.17	0.66	2.0e-08
Ntpcr	29.23	18.55	0.66	9.9e-04
Prpf19	427.36	270.42	0.66	2.1e-10
Ndufaf3	53.65	34.19	0.66	3.2e-05
Pigyl	18.67	12.09	0.66	1.1e-02
Tmem43	30.55	19.25	0.66	8.5e-04
Cdc42ep3	16.98	10.78	0.66	7.3e-03
Mettl1	28.01	17.72	0.66	1.0e-03
Lzts3	231.68	148.26	0.66	8.5e-08
Arpc5l	122.79	77.5	0.66	7.1e-07
Mcts1	62.92	39.69	0.66	7.6e-06
Pgk1	25.9	16.48	0.66	1.2e-03
Stmn1	21.05	13.32	0.66	3.1e-03
Cnih2	162.54	108.49	0.66	2.0e-05
Pwwp2b	18.11	11.48	0.66	5.8e-03
Tfcp2	61.24	38.81	0.66	1.0e-05
Ndufa13	41.87	27.43	0.66	4.6e-04
2410015M20Rik	56.3	35.71	0.66	1.6e-05
Cbx8	23.5	14.98	0.66	2.3e-03
1810043G02Rik	62.37	39.88	0.66	3.2e-05
Gm42433	10.5	6.76	0.66	3.5e-02
Swi5	120.76	76.74	0.66	1.9e-07
Pnma3	106.93	67.61	0.66	6.0e-07
Vps28	181.3	115.55	0.66	4.2e-08
Sec61b	18.53	11.75	0.66	5.6e-03
Zdhhc7	48.62	30.86	0.66	4.4e-05
B4gat1	77.94	49.77	0.66	5.7e-06
Ccdc85a	139.44	88.07	0.66	8.9e-08
Eid2b	64.19	40.71	0.66	7.0e-06
Wbp4	94.81	60.18	0.66	5.7e-07
Lingo3	27.12	17.63	0.66	2.4e-03
Polr2h	12.35	7.87	0.66	2.4e-02
Ppp3r1	704.95	442.66	0.66	3.4e-10
Tfg	95.48	60.61	0.66	8.1e-07
2410004B18Rik	32	20.33	0.66	4.8e-04
Bccip	41.57	26.23	0.66	1.2e-04
Trappc1	32.86	20.86	0.66	3.9e-04
Apopt1	26.93	17.07	0.66	1.1e-03
Sra1	84.26	53.57	0.65	4.0e-06
Hpcal4	1351.6	859.26	0.65	2.6e-11
Capns1	334.38	213.16	0.65	2.8e-09
Mcfd2	95.68	60.74	0.65	6.5e-07
Cuta	36.93	23.93	0.65	4.6e-04
Wars	200.12	127.34	0.65	2.8e-08
Atp6v0b	89.85	58.25	0.65	1.3e-05
Slc35g2	32.35	20.58	0.65	4.2e-04
Pygo2	92.49	58.93	0.65	3.2e-06
Rab1b	260.72	166.8	0.65	1.9e-08
Bad	32.69	21.4	0.65	2.0e-03
Particl	22.19	14.21	0.65	3.1e-03
Tbrg1	54.01	34.37	0.65	2.3e-05
Eef1g	81.01	51.54	0.65	3.3e-06
Coa3	73.44	47.31	0.65	3.7e-05
Zbtb11	159.29	102.25	0.65	7.0e-08
Tmem141	17.91	11.41	0.65	8.1e-03
Cops7a	187.44	119.85	0.65	6.8e-08
Dcaf12l1	278.19	177.01	0.65	5.6e-08
Trim37	751.41	478.34	0.65	8.3e-11
Dkk3	59.65	38.12	0.65	1.5e-05
Gpr12	20.46	13.05	0.65	4.2e-03
Ydjc	31.66	20.38	0.65	6.8e-04
Pcp4l1	63.52	40.46	0.65	9.3e-06
Mon1a	26.55	17.43	0.65	4.7e-03
Begain	190.19	125.05	0.65	1.3e-06
Cit	381.53	243.79	0.65	1.3e-09
Pdrg1	55.13	35.17	0.65	3.7e-05
Srsf5	67.52	43.23	0.65	1.0e-05
Mrpl21	29.52	18.81	0.65	7.9e-04
Cotl1	112.79	72.83	0.65	5.4e-06
Cib2	88.21	56.62	0.65	4.0e-06
Snx8	61.12	39.07	0.65	1.4e-05
Stoml1	51.53	33.17	0.65	7.5e-05
Slc1a6	24.93	16	0.65	2.8e-03
Pja1	561.11	358.12	0.65	3.5e-10
F2r	19.64	12.52	0.65	4.8e-03
Ywhab	1596.06	1015.37	0.65	5.4e-11
Pomp	158.06	100.54	0.65	2.5e-07
Aurkaip1	82.75	53.61	0.65	1.8e-05
Mrps25	42.58	27.19	0.65	1.9e-04
Kcns2	32.49	20.88	0.65	5.9e-04
Ier5l	11.96	8.06	0.65	4.5e-02
Tdrp	59.11	37.75	0.65	1.6e-05
C2cd2l	120.05	77.09	0.65	2.7e-07
Commd9	48.9	31.46	0.65	8.8e-05
Nudt18	75.94	48.61	0.65	1.3e-05
Ache	155.12	101.28	0.65	1.1e-06
Akr1a1	607.64	391.92	0.65	4.1e-08
Ypel4	58.36	37.33	0.65	1.9e-05
Arpc1a	231.68	148.94	0.65	1.3e-07
Rasd2	197.39	125.97	0.64	1.6e-08
Cd83	91.05	58.24	0.64	1.2e-06
Qpctl	19.66	12.63	0.64	5.6e-03
Fbll1	94.96	62.43	0.64	1.4e-05
Clpp	67	43.32	0.64	2.9e-05
Astn2	66.63	42.64	0.64	8.6e-06
Lrrc73	58.03	38.14	0.64	1.2e-04
Lemd1	20.89	13.36	0.64	4.0e-03
Tmem251	11.91	7.6	0.64	2.9e-02
Ssx2ip	215.97	136.85	0.64	5.3e-08
Bsg	181.54	117.91	0.64	9.4e-07
Mrps17	77.01	49.35	0.64	3.8e-06
Ndufs8	73.08	47.41	0.64	1.2e-05
Fkbpl	11.11	7.12	0.64	3.7e-02
Uchl1	1140.18	739.34	0.64	3.4e-09
Gpr162	116.67	75.94	0.64	3.6e-06
Ppp3ca	887	563.26	0.64	7.1e-10
Rab11fip1	11.82	7.61	0.64	2.9e-02
Bola2	33.96	22.14	0.64	8.2e-04
Ghitm	549.74	350.78	0.64	8.0e-10
Khdrbs3	84.15	53.97	0.64	6.5e-06
Alkbh6	38.9	25.52	0.64	7.6e-04
Gabarapl1	1211.1	776.07	0.64	8.7e-11
Slc22a17	578.57	382.07	0.64	1.4e-07
Fuca1	26.66	17.22	0.64	1.7e-03
Eid2	73.39	47.89	0.64	3.5e-05
Zbtb8b	13.91	8.93	0.64	1.9e-02
Zfpl1	23.01	14.97	0.64	4.7e-03
Wrnip1	129.74	83.17	0.64	3.8e-07
Rab3ip	50.91	32.52	0.64	1.4e-04
Fam136a	46.46	29.68	0.64	9.6e-05
Tmem199	64.8	41.64	0.64	1.3e-05
Srf	73.44	47.23	0.64	6.3e-06
Mboat7	250.89	161.15	0.64	7.0e-09
Ormdl3	47.22	30.65	0.64	1.8e-04
Atp6v0c	24.64	16	0.64	2.4e-03
Ubtf	128.57	83.07	0.64	1.3e-06
Gspt2	75.26	48.21	0.64	6.6e-06
Prkcg	86.98	56.35	0.64	5.9e-06
Spryd3	397.26	258.75	0.64	5.2e-08
Acvr1c	19.37	12.8	0.64	1.1e-02
Ost4	16.31	10.61	0.64	1.8e-02
Evl	207.47	134.54	0.64	7.1e-08
Chmp5	105.21	67.82	0.64	7.9e-07
Stk19	21.9	14.21	0.64	5.8e-03
Faah	25.49	16.44	0.64	2.1e-03
Camta2	282.42	183.11	0.64	8.0e-08
Zfp771	36.6	26.45	0.64	5.0e-03
Sema3a	10.1	6.61	0.64	4.8e-02
Cpne7	64.04	41.44	0.64	1.6e-05
Relt	21.63	14.03	0.64	5.6e-03
Pnck	439.96	284.81	0.64	1.1e-08
Otp	106.01	68.13	0.64	1.1e-06
Sh2d5	96.51	62.26	0.64	5.4e-06
Lcmt1	121.76	78.32	0.64	7.9e-07
Incenp	12.28	7.9	0.64	2.7e-02
Ssr2	33.78	21.97	0.64	1.0e-03
Slbp	43.27	27.78	0.64	1.5e-04
Tubg2	89.95	58.61	0.64	1.0e-05
Sumo1	37.24	23.84	0.64	3.4e-04
Fam171a2	55.69	36.58	0.64	6.1e-05
Med9	80.57	52.08	0.64	6.8e-06
Oaz2	137.37	88.55	0.64	1.2e-06
Chn1	371.16	238.18	0.64	2.3e-09
2700062C07Rik	13.37	8.6	0.64	2.2e-02
Haghl	71.04	46.54	0.63	3.6e-05
B4galnt1	41.89	27.69	0.63	6.5e-04
Arhgap6	114.02	74.42	0.63	2.6e-06
Ppil1	17.03	11.08	0.63	1.4e-02
Tpd52l1	39.92	25.65	0.63	2.6e-04
Cyb561d2	14.65	9.45	0.63	1.7e-02
Atp5a1	1466.6	944.77	0.63	4.6e-10
Borcs6	36.01	23.46	0.63	7.0e-04
Arhgef25	120.91	78.99	0.63	3.2e-06
Gpx4	61.04	39.91	0.63	1.6e-04
Fkbp8	521.25	345.92	0.63	2.0e-07
Ube2e3	108.41	69.46	0.63	1.2e-06
Timm10	28.72	18.64	0.63	3.2e-03
Hist3h2ba	28.68	19.3	0.63	4.4e-03
Oprl1	165.95	106.94	0.63	8.9e-08
Rnps1	53.64	34.6	0.63	3.8e-04
Zfp414	22.34	14.63	0.63	4.8e-03
Gstm6	28.61	18.48	0.63	1.2e-03
Sh3yl1	19.09	12.35	0.63	7.1e-03
Snx3	179.67	116.12	0.63	2.6e-07
Vstm2l	65.26	45.01	0.63	3.6e-04
Acot7	527.77	344.37	0.63	1.3e-08
Sorcs3	62.22	40.21	0.63	2.0e-05
Got2	119.18	77.08	0.63	1.6e-06
Cdipt	85.36	55.76	0.63	1.1e-05
Tmem59l	182.74	119.81	0.63	3.2e-07
Iqsec2	155.22	101.48	0.63	9.8e-07
Stk26	14.2	9.22	0.63	2.0e-02
Ruvbl1	16.05	10.37	0.63	1.3e-02
Rpl13a	21.92	14.18	0.63	4.3e-03
Gabarapl2	55.57	35.83	0.63	7.3e-05
Hp1bp3	513.43	331.09	0.63	2.8e-09
Polr1d	33.53	21.68	0.63	6.0e-04
Dpy30	24.84	16.07	0.63	2.9e-03
Serpini1	84.71	55.12	0.63	4.8e-06
Srp9	59.23	38.15	0.63	9.0e-05
Pnma1	21.61	14.12	0.63	6.2e-03
Crmp1	366.38	237.28	0.63	3.6e-08
Syt4	203.56	132.25	0.63	4.0e-08
Slc24a4	15.06	9.75	0.63	1.6e-02
Yars2	17.48	11.34	0.63	1.1e-02
Hdgfl2	99.35	64.8	0.63	3.2e-06
Atp6v1a	1026.18	662.44	0.63	4.1e-10
Mrpl43	66.62	43.58	0.63	4.3e-05
Gtf2f2	16.05	10.33	0.63	1.5e-02
Ndufb11	81.58	53.66	0.63	5.9e-05
Rxfp3	14.54	9.35	0.63	2.4e-02
Lrp3	109.54	72.24	0.63	1.6e-05
Slc8a2	96.33	62.48	0.63	1.9e-06
Vsnl1	751.91	487.18	0.63	4.7e-10
Napepld	54.53	35.17	0.63	7.3e-05
Kti12	10.94	7.11	0.63	4.2e-02
Rpl26	42.97	27.88	0.63	1.9e-04
Sprn	55.11	35.75	0.63	5.4e-05
Ndufa2	92.34	61.45	0.62	5.6e-05
Trim32	417.76	270.94	0.62	2.6e-09
Pkd2l2	25.1	16.28	0.62	2.5e-03
Nat9	18.39	11.92	0.62	8.9e-03
Rps4l	29.15	20.04	0.62	4.0e-03
Ccdc92	241.79	159.39	0.62	2.8e-07
Mrps18a	46.03	29.93	0.62	1.9e-04
Necab3	22.82	14.95	0.62	6.3e-03
Armcx5	43.84	28.18	0.62	4.3e-04
Psd	300.06	198.12	0.62	1.4e-07
Kctd4	45.3	29.11	0.62	2.0e-04
Lypla2	105.16	70.49	0.62	8.0e-05
Utp23	10.51	6.8	0.62	4.8e-02
Nyap1	271.03	178.61	0.62	1.8e-07
Gsk3a	232.32	151.67	0.62	2.6e-07
Snph	357.71	234.42	0.62	5.2e-07
Aldoa	1743.49	1148.45	0.62	1.2e-08
1110059E24Rik	33.29	21.6	0.62	7.4e-04
Pik3r2	117.84	78.28	0.62	1.9e-05
Txnrd2	14.34	9.35	0.62	2.3e-02
Hexdc	28.6	18.59	0.62	2.1e-03
Zfp831	40.86	27.03	0.62	3.6e-04
A730017C20Rik	517.28	336.75	0.62	1.6e-09
Tusc2	114.65	74.64	0.62	1.2e-06
Clns1a	95.67	62.26	0.62	2.4e-06
Gpatch4	22.11	14.55	0.62	1.1e-02
Chd3os	300.52	195.23	0.62	1.0e-08
Nim1k	37.13	24.07	0.62	6.0e-04
Trappc2	24.79	16.32	0.62	3.1e-03
Cant1	71.64	46.7	0.62	1.3e-05
Cyb5rl	11.51	7.49	0.62	4.1e-02
Spire2	64.52	42.48	0.62	9.2e-05
Dmap1	42.3	27.56	0.62	2.4e-04
Selenow	330.05	222.51	0.62	9.2e-06
Pcdhga12	12.83	8.35	0.62	2.9e-02
Prmt2	313.18	204.37	0.62	9.4e-09
Cdc42bpb	335.51	218.64	0.62	2.3e-08
Zfr2	106.29	70.4	0.62	9.5e-06
Vamp2	1650.43	1080.34	0.62	3.2e-09
Smc1a	69.09	45.55	0.62	5.3e-05
Zdhhc22	85.19	55.66	0.62	9.1e-06
Nrsn2	196.32	128.87	0.62	1.0e-07
Rps3	294.4	192.2	0.62	1.3e-08
Sod1	234.55	154.47	0.62	7.2e-07
Rps6ka2	192.71	125.33	0.62	1.2e-07
Chst2	105.14	68.38	0.62	1.4e-05
Htra2	23.85	15.71	0.62	4.4e-03
Cnot7	106.95	68.88	0.62	2.9e-06
Aloxe3	12.65	8.35	0.62	3.6e-02
1110065P20Rik	19.99	14.21	0.62	2.6e-02
Arl1	78.27	51.04	0.62	8.6e-06
Tmem101	12.63	8.33	0.62	4.0e-02
Mrm2	21.27	13.94	0.62	7.9e-03
Cpne4	88.21	57.61	0.62	4.7e-06
Abcg4	67.54	44.02	0.62	2.1e-05
Preb	103.47	67.56	0.62	1.9e-06
Usmg5	39.79	25.9	0.62	4.7e-04
Lsm4	33.95	22.83	0.62	3.1e-03
Nhlrc1	52.39	34.21	0.61	8.3e-05
Rhof	87.22	57.01	0.61	6.1e-06
Pfdn1	74.32	48.72	0.61	2.8e-05
Sh3gl2	371.84	242.82	0.61	6.4e-09
Ndel1	195.14	127.36	0.61	2.0e-07
Dnajc30	27.11	17.83	0.61	4.1e-03
Dmac1	22.95	15.01	0.61	4.7e-03
Zfp628	30.44	20.35	0.61	3.0e-03
Cfap20	52.81	34.58	0.61	1.1e-04
Tctex1d2	14.77	9.6	0.61	2.7e-02
Ndn	1349.63	881.42	0.61	4.3e-07
Snrpd1	33.9	21.99	0.61	9.7e-04
Nol12	34.47	22.53	0.61	7.4e-04
Nap1l2	244.91	159.62	0.61	4.1e-08
Map7d1	405.38	268.29	0.61	4.6e-08
Trnp1	79.03	54.23	0.61	2.8e-04
Oprd1	12.32	8.05	0.61	3.4e-02
Prcc	106.06	70.13	0.61	9.7e-06
Tmem147	45.96	30.51	0.61	1.1e-03
Tmem106c	49.7	32.57	0.61	1.3e-04
1110038F14Rik	12.23	8.09	0.61	4.6e-02
Hebp1	29.65	19.5	0.61	4.9e-03
Anapc11	78	51.45	0.61	6.4e-05
Get4	49.65	32.77	0.61	1.7e-04
Slit2	102.8	67.92	0.61	4.2e-06
Slc2a6	12.37	8.15	0.61	3.6e-02
Coq5	81.07	53.08	0.61	8.3e-06
Nifk	33.03	21.41	0.61	1.4e-03
Snap25	1988.09	1299.83	0.61	4.0e-10
Arl6ip5	84.55	55.41	0.61	9.4e-06
Uck1	31.57	20.82	0.61	1.7e-03
Adap1	193.11	127.67	0.61	7.3e-07
Maged1	1753	1153.85	0.61	2.2e-09
Emc4	32.67	21.4	0.61	1.1e-03
Ndufc2	73.53	48.44	0.61	9.7e-05
Ewsr1	117.33	76.94	0.61	1.5e-06
Txnl4a	22.95	15.03	0.61	4.7e-03
Cisd1	89.8	59.84	0.61	6.8e-05
Dleu7	25.22	16.5	0.61	4.0e-03
Sidt1	19.51	12.79	0.61	8.4e-03
Adra2a	50.42	32.67	0.61	1.6e-04
Bhlhe41	108.12	70.36	0.61	6.7e-06
Atp5j2	22.02	14.76	0.61	8.2e-03
Usf1	81.17	53.53	0.61	1.9e-05
Nrxn2	480.35	319.41	0.61	5.6e-08
Pde8b	162.67	106.57	0.61	2.5e-07
Rnf220	242.04	159.24	0.61	5.2e-08
Riok1	24.01	15.85	0.61	4.4e-03
Hagh	90.93	60.33	0.61	2.2e-05
Nt5c	41.6	27.51	0.61	9.1e-04
Pacsin1	666.34	441.75	0.61	3.0e-08
Lpcat4	35.27	23.42	0.61	1.0e-03
Rnf126	53.61	36.67	0.61	8.2e-04
Triap1	17.72	11.57	0.61	1.3e-02
Rgmb	100.69	66.12	0.61	3.3e-06
Tatdn2	83.91	55.12	0.61	8.7e-06
Twf2	42.87	28.93	0.61	1.3e-03
Agfg2	75.94	50.38	0.61	5.9e-05
Lrrc14	53.45	35.46	0.61	2.1e-04
Atg9b	31.97	21.32	0.61	1.9e-03
Umad1	89.01	58.41	0.61	6.5e-06
Fndc10	42.69	28.19	0.61	3.4e-04
Gpat4	96.86	63.74	0.6	6.5e-06
Tomm22	69.37	45.63	0.6	2.6e-05
Chchd1	31.92	20.87	0.6	1.4e-03
Celf3	175.57	116.03	0.6	3.8e-07
Spout1	24.27	16.15	0.6	6.2e-03
Arl6	48.09	31.62	0.6	1.8e-04
Pef1	142.88	94.03	0.6	5.9e-07
Commd8	77.78	51.54	0.6	1.6e-05
Ehbp1l1	46.53	31.37	0.6	7.1e-04
Gnl2	56.92	37.5	0.6	7.4e-05
Npnt	13.47	8.75	0.6	3.5e-02
Mrgpre	32.94	21.95	0.6	1.7e-03
Gamt	20.74	13.81	0.6	8.9e-03
Wbp2	591.31	393.1	0.6	4.7e-08
Wasl	279.38	183.6	0.6	3.9e-08
Dync1i1	266.84	175.95	0.6	4.4e-08
Clec2l	24.28	16.2	0.6	6.8e-03
Sult4a1	707.12	470.17	0.6	2.2e-07
Abhd17a	93.93	64.46	0.6	1.2e-04
Herpud1	71.32	47.42	0.6	5.0e-05
Hnrnpk	267.94	175.66	0.6	6.1e-08
Stmn2	784.95	517.82	0.6	2.5e-09
Tspan17	29.41	19.58	0.6	2.9e-03
Chmp2b	78.89	51.87	0.6	1.6e-05
Aamp	227.27	150.56	0.6	1.7e-07
Syt3	36.3	24.15	0.6	1.1e-03
Tmem143	26.1	17.45	0.6	5.0e-03
Yrdc	25.34	16.72	0.6	4.0e-03
Tor2a	11.27	7.47	0.6	4.9e-02
Cmas	213.75	141.1	0.6	1.1e-07
Pdzd11	36.46	24.07	0.6	7.5e-04
Tusc3	115.08	75.87	0.6	4.7e-06
Prkar1a	1866.83	1230.11	0.6	2.2e-09
Adarb1	430.76	284.42	0.6	9.9e-09
Cdkn2d	90	59.85	0.6	2.5e-05
Timm50	31.28	21.12	0.6	3.6e-03
Fbxo27	13	8.59	0.6	3.6e-02
Rrp36	20.85	13.81	0.6	9.4e-03
Eid1	300.46	194.71	0.6	3.6e-07
Tmem109	27.17	18.08	0.6	3.5e-03
Pim2	71.52	47.44	0.6	3.7e-05
Slit1	159.67	106.13	0.6	2.6e-06
Gatd1	54.66	36.26	0.6	1.5e-04
Pcnx3	64.53	42.74	0.6	4.9e-05
Srpr	52.14	34.45	0.6	1.7e-04
Exosc9	32.55	21.6	0.6	1.3e-03
1700003E16Rik	42.98	28.75	0.6	6.7e-04
Dtx3	243.46	163.74	0.6	1.8e-06
Mrfap1	245.09	162.63	0.6	6.9e-07
Atp9a	398.59	265.25	0.6	7.9e-08
Wipf3	47.01	31.19	0.6	2.4e-04
Gpr165	161.26	106.8	0.6	4.5e-07
Elfn1	28.59	19.14	0.6	3.8e-03
Thop1	48.07	32.39	0.6	6.3e-04
Rraga	252.94	167.36	0.6	8.7e-08
Myl6b	42	27.91	0.6	4.5e-04
Ina	373.16	246.63	0.6	8.7e-08
Mtcl1	123.24	82.71	0.6	1.6e-05
Tmem50a	52.75	35.32	0.6	3.7e-04
Adgrb2	209.24	140.63	0.6	1.4e-06
Polr2c	13.18	8.78	0.6	3.5e-02
Snx2	113.9	75.85	0.59	5.4e-06
Btbd11	173.28	114.73	0.59	3.4e-07
Snrnp27	30.18	20.05	0.59	2.1e-03
Sbds	61.85	41.01	0.59	8.2e-05
Chchd4	85.41	56.11	0.59	3.3e-05
Zfp358	46.86	31.3	0.59	3.5e-04
Pcbd1	77.03	50.97	0.59	2.1e-05
Chmp1a	127.63	85.23	0.59	6.9e-06
Pianp	152.72	102.37	0.59	3.1e-06
Cnrip1	89.18	59.31	0.59	1.0e-05
Ccdc28a	49.84	33.23	0.59	3.5e-04
Rbck1	150.13	100.72	0.59	7.3e-06
Imp3	37.41	24.76	0.59	8.1e-04
Slmap	192.72	127.96	0.59	2.4e-07
Pex6	115.69	77.66	0.59	1.3e-05
Mapk11	37.52	25.25	0.59	1.7e-03
Cadm3	340.74	226.14	0.59	5.7e-08
Mydgf	26.34	17.52	0.59	3.7e-03
Pisd	20.58	13.65	0.59	1.1e-02
Bmyc	13.66	9.36	0.59	4.0e-02
B630019K06Rik	332.04	220.66	0.59	8.3e-08
Crls1	37.6	24.76	0.59	9.1e-04
Vps9d1	43.26	28.81	0.59	6.0e-04
Ier3ip1	31.02	20.39	0.59	2.0e-03
Ldb2	86.27	57.07	0.59	1.2e-05
Nop9	16.95	11.18	0.59	3.6e-02
Fbxo44	154.74	103.2	0.59	7.3e-06
Sirt3	44.91	29.82	0.59	4.8e-04
Lhfpl5	16.38	10.88	0.59	1.9e-02
Sdhd	120.81	80.24	0.59	4.6e-06
Rita1	22.12	14.94	0.59	1.1e-02
Dusp14	20.14	13.36	0.59	9.6e-03
Kcnip2	98.94	65.44	0.59	8.8e-06
Vstm2b	31.34	21.5	0.59	6.0e-03
Jph4	486.77	328.42	0.59	6.5e-07
Cbarp	813	549.37	0.59	2.4e-08
Qrsl1	17.53	11.61	0.59	1.5e-02
Kif3c	465.18	309.46	0.59	3.1e-08
Porcn	16.5	11.09	0.59	2.5e-02
Sdhc	138.9	92.84	0.59	1.1e-05
0610012G03Rik	45.1	30.57	0.59	1.2e-03
Pin1	100.49	67.42	0.59	2.0e-05
Pdcd7	63.7	42.52	0.59	1.0e-04
Bid	25.18	16.7	0.59	4.6e-03
Dmtn	538.33	361.33	0.59	1.4e-07
Mrm3	24.07	15.97	0.59	5.8e-03
Amz1	42.91	28.64	0.59	6.1e-04
Tpra1	31.05	20.66	0.59	1.9e-03
Asns	166.39	110.78	0.59	5.8e-07
Fkbp5	67.61	44.98	0.59	4.6e-05
Lingo1	76.46	51.55	0.59	5.6e-05
Gsto1	67.74	45.17	0.59	6.7e-05
Shd	61.54	41.65	0.59	2.8e-04
Cdo1	60.72	40.11	0.59	2.6e-04
Rnf187	541.9	369.83	0.59	9.0e-07
Sf1	222.37	148.16	0.59	2.5e-07
B4galnt4	61.4	41.15	0.59	1.1e-04
Rpl13	28.01	18.65	0.59	4.8e-03
Lyplal1	14.57	9.7	0.59	2.8e-02
Mthfsd	32.86	21.87	0.59	1.6e-03
Med19	59.02	39.11	0.59	1.4e-04
Cfdp1	89.03	59.29	0.59	1.3e-05
Matr3	659.84	437.01	0.59	1.0e-08
Rpusd4	12.89	8.56	0.59	4.3e-02
Dmac2	64.19	43.05	0.59	2.7e-04
Sephs2	67.77	44.98	0.59	6.3e-05
Atp5h	49.75	33.04	0.59	2.5e-04
Cox6a1	83.07	60.63	0.59	2.1e-03
Iffo1	51.42	34.65	0.59	7.5e-04
Yipf4	39.92	26.66	0.59	1.1e-03
Adprh	94.48	64.01	0.59	5.3e-05
Arpc5	118.75	78.38	0.59	1.1e-05
Actl6b	70.81	47.38	0.59	5.0e-05
Nob1	41.85	28.12	0.59	1.7e-03
Armc7	17.91	11.94	0.59	1.6e-02
Fam58b	21.47	14.49	0.59	1.2e-02
Mospd3	28.26	19.59	0.58	1.2e-02
Hprt	311.69	208.51	0.58	7.2e-08
Lmo4	69.1	45.76	0.58	5.0e-04
Galnt9	33.98	22.73	0.58	1.5e-03
Cbr1	96.85	65.26	0.58	2.3e-05
Phf20	175.75	116.92	0.58	6.6e-07
Eif1	143.49	95.71	0.58	1.4e-06
Eif1b	166.41	111.07	0.58	1.1e-06
Rap2a	299.3	199.71	0.58	7.2e-08
Uqcc2	86.49	58.55	0.58	2.4e-04
Zwint	2999.66	2001.54	0.58	2.0e-09
Rtl8a	42.3	28.51	0.58	7.4e-04
Coq7	25.33	16.94	0.58	4.9e-03
Gpr88	26.65	17.14	0.58	1.3e-02
1110012L19Rik	13.42	8.91	0.58	4.3e-02
Aup1	23.05	15.36	0.58	7.1e-03
Clptm1l	79.96	53.25	0.58	4.8e-05
Rab2a	381.27	253.67	0.58	6.2e-08
Zbtb12	13.61	9.07	0.58	3.7e-02
Klhl29	110.03	73.52	0.58	6.9e-06
Cpne8	15.38	10.21	0.58	2.6e-02
Fam103a1	20.32	13.43	0.58	1.5e-02
Dstn	196.94	131.43	0.58	4.0e-07
Vcp	78.32	52.43	0.58	5.2e-05
Bud31	24.17	16.13	0.58	6.3e-03
Yeats4	32.48	21.66	0.58	2.3e-03
Ddx24	395.3	264.38	0.58	3.8e-08
Tk2	109.4	73.12	0.58	8.7e-06
Ndufs4	80.02	53.26	0.58	3.0e-05
Chmp6	29.05	19.5	0.58	4.5e-03
Ubr3	305.36	205.16	0.58	1.4e-07
Ap1s2	229.04	153.38	0.58	2.4e-07
Tecr	180.76	123.08	0.58	7.2e-06
Hnrnpc	199.32	133.54	0.58	4.1e-07
Cabp7	39.4	26.28	0.58	3.7e-03
Hnrnpa2b1	227.81	152.81	0.58	8.3e-06
Prkcz	190.87	127.65	0.58	1.2e-06
C2cd4c	78.92	53.49	0.58	5.6e-05
6030419C18Rik	150.49	102.79	0.58	2.8e-05
Atg7	42.06	28.18	0.58	6.7e-04
Zc3h10	26.9	18.1	0.58	5.3e-03
Mdh2	445.37	301.6	0.58	2.2e-06
Vopp1	63.06	42.37	0.58	1.2e-04
Nptn	250.13	166.87	0.58	4.5e-07
Usp21	49.88	33.54	0.58	4.8e-04
Lyrm7	16.19	10.88	0.58	2.3e-02
Ndufa5	31.5	21.13	0.58	3.3e-03
Cdk20	18.05	12.1	0.58	1.7e-02
Foxp4	97.67	66.55	0.58	4.3e-05
Sord	25.75	17.29	0.58	5.0e-03
Smyd2	57.66	39.01	0.58	3.9e-04
Ak1	181.42	122.41	0.58	9.4e-06
Meis3	45.81	31.03	0.58	6.5e-04
Psap	747.54	503.19	0.58	3.8e-08
Arl8a	254.77	172.06	0.58	1.0e-06
Atp6v1h	265.61	178.47	0.58	1.8e-07
Uqcr10	82.61	55.71	0.58	4.1e-05
Ptms	326.23	228.25	0.58	2.3e-05
Jph2	13.36	8.91	0.58	4.1e-02
Bcs1l	29.43	19.74	0.58	3.1e-03
Traip	15.86	10.55	0.58	3.0e-02
Evpl	32.4	22.01	0.58	3.3e-03
Sim1	50.03	34.61	0.58	8.3e-04
Rtca	30.11	20.33	0.58	3.2e-03
Pafah1b3	70.49	48.01	0.58	1.3e-04
Mrpl11	53.31	35.79	0.58	2.3e-04
Tesk1	59.43	40.35	0.57	3.0e-04
Cyp46a1	61.22	41.45	0.57	2.8e-04
Mrps23	58.09	38.77	0.57	7.0e-04
Med21	30	20.18	0.57	2.9e-03
Psmb10	47.98	33.54	0.57	2.3e-03
Eif4g1	380.61	255.48	0.57	1.7e-06
Hcrtr2	13.73	9.28	0.57	3.9e-02
Terf2ip	194.9	131.22	0.57	8.8e-07
Tunar	113.46	76.2	0.57	7.9e-06
Ndufa3	57.61	38.89	0.57	3.4e-04
Ube2j2	31.8	21.64	0.57	4.4e-03
Atg101	30.67	20.95	0.57	5.2e-03
Med30	18.47	12.43	0.57	2.0e-02
Casz1	27.47	19.2	0.57	1.0e-02
Carns1	15.49	10.45	0.57	2.9e-02
Rabac1	112.06	80.86	0.57	4.7e-04
Trmt10a	13.61	9.04	0.57	4.2e-02
Mark4	122.61	83.26	0.57	2.2e-05
Cops8	176.88	119.12	0.57	1.3e-06
Rps9	133.95	91.32	0.57	1.2e-05
Surf1	61.3	41.49	0.57	2.0e-04
Naca	40	26.87	0.57	1.2e-03
Mib2	168.13	114.89	0.57	6.1e-06
Ptprr	22.51	15.04	0.57	9.8e-03
Sema4g	39.97	26.78	0.57	1.3e-03
Capn1	15.15	10.25	0.57	4.3e-02
Tmub1	15.87	10.66	0.57	2.7e-02
Lamtor2	29.45	20.04	0.57	5.0e-03
Kcnq2	463.63	312.68	0.57	5.3e-08
Otud5	180.2	121.49	0.57	1.5e-06
R3hdm4	67.25	45.66	0.57	1.9e-04
Rpp25	18.85	12.96	0.57	2.4e-02
Cep19	78.6	52.96	0.57	4.3e-05
Fbxw5	117.62	79.65	0.57	1.5e-05
B4galt3	17.21	11.59	0.57	2.2e-02
Med28	134.58	90.27	0.57	1.2e-05
Nipsnap1	133.06	89.78	0.57	5.4e-06
Gas6	64.52	43.77	0.57	3.0e-04
Sdc2	77.27	52.02	0.57	4.9e-05
Psmg1	26.89	18.11	0.57	5.5e-03
Slc25a38	49.67	33.7	0.57	5.7e-04
App	803.3	542.92	0.57	6.4e-08
Srm	54.33	37.12	0.57	4.2e-04
Lrrc27	18.05	12.2	0.57	1.9e-02
Ttll1	84.89	57.42	0.57	3.8e-05
Limd2	43.65	29.68	0.57	9.8e-04
Agap3	417.79	285.87	0.57	7.9e-07
Zfp941	138.46	93.17	0.57	3.7e-06
Camk1	105.73	71.55	0.57	1.3e-05
Chmp2a	97.76	66.38	0.57	3.8e-05
Rpl15	108.52	73.61	0.57	1.1e-05
Rpl7a	28.53	19.27	0.57	4.2e-03
Mrpl42	33.35	22.36	0.57	3.6e-03
Sharpin	56.41	38.39	0.57	3.9e-04
Fmc1	22.06	15.24	0.57	2.4e-02
Cnpy3	45.83	31.12	0.57	6.8e-04
Lamtor4	30.7	21.08	0.57	5.7e-03
Tspan7	448.74	303.15	0.57	7.2e-08
Gm16286	163.18	110.82	0.57	7.0e-06
Gripap1	100.36	67.97	0.57	2.1e-05
Dnajc14	62.17	42.01	0.57	1.4e-04
Tsfm	26.57	18.2	0.56	8.6e-03
Itgb1bp1	33.28	22.38	0.56	2.6e-03
Ankrd46	364.17	245.96	0.56	1.5e-07
1500011B03Rik	97.51	65.96	0.56	1.8e-05
Fam92a	60.17	40.66	0.56	1.8e-04
Pfn1	136.82	96.07	0.56	2.2e-04
Thoc3	85.27	57.72	0.56	4.1e-05
Tspyl1	516.68	349.42	0.56	5.7e-08
Cdr2	41.81	28.29	0.56	1.3e-03
Fam217b	194.97	132.2	0.56	1.0e-06
Rps4x	59.67	40.45	0.56	2.0e-04
Dbndd1	65.88	44.89	0.56	1.6e-04
Gtf2h1	63.5	43.14	0.56	1.5e-04
Optn	48.98	32.92	0.56	9.5e-04
Fam162a	35.48	24	0.56	2.0e-03
Gaa	930.36	635.74	0.56	6.8e-08
Cmc1	25.67	17.19	0.56	7.7e-03
Arhgef3	53.16	35.94	0.56	3.6e-04
Tmub2	39.88	27.07	0.56	1.2e-03
Rnaseh2a	27.54	18.65	0.56	5.2e-03
Alad	35.81	24.68	0.56	4.1e-03
Slc29a4	26.4	18.34	0.56	1.2e-02
Dnal4	56.85	39.16	0.56	8.3e-04
Elp5	82.18	55.91	0.56	6.7e-05
Thap3	19.53	13.42	0.56	2.0e-02
Emd	54.02	36.77	0.56	4.3e-04
Cmc2	14.14	9.56	0.56	4.1e-02
Gnaz	235.47	160.48	0.56	1.7e-06
Tmem191c	44.27	31.13	0.56	3.7e-03
Tcf25	1185.61	805.69	0.56	2.7e-08
Grk6	104.56	71.24	0.56	3.2e-05
Kif21a	599.01	406.77	0.56	5.3e-08
Tmem55b	108.2	73.68	0.56	3.9e-05
Rtraf	35.68	24.22	0.56	2.5e-03
Rac1	292.57	198.19	0.56	3.7e-06
Tceal5	28.92	19.8	0.56	5.3e-03
Gm42517	44.33	30.84	0.56	1.3e-03
Gls2	43.67	29.77	0.56	1.0e-03
Ift22	127.41	86.63	0.56	9.7e-06
Plekhg5	49.55	34.19	0.56	1.5e-03
Syngap1	297.71	202.03	0.56	8.4e-07
Hspe1	21.96	14.69	0.56	1.5e-02
Mkrn1	169.07	114.5	0.56	7.4e-06
Mmachc	24.98	16.96	0.56	7.6e-03
Gpn3	23.78	16.16	0.56	9.1e-03
Dxo	18.28	12.71	0.56	2.7e-02
Kcnj3	54.48	37.47	0.56	3.8e-04
Mrpl2	30.87	21.5	0.56	8.2e-03
Kifc2	242.49	165.5	0.56	1.6e-06
Saraf	196.17	133.67	0.56	1.4e-06
Tpi1	592.76	406.38	0.56	2.0e-06
Ran	161.29	109.59	0.56	3.7e-06
Eif3f	188.83	128.34	0.56	1.5e-06
Adam11	83.14	56.82	0.56	7.2e-05
Ralyl	131.64	89.41	0.56	6.9e-06
Cnpy2	25.82	17.62	0.56	7.4e-03
Dap3	101.93	69.14	0.56	3.6e-05
Htr1b	37.59	25.57	0.56	1.6e-03
Gpr173	35.08	24.05	0.56	3.7e-03
Tm2d2	33.62	23	0.56	3.3e-03
Sfpq	178.24	121.32	0.56	1.9e-06
Lin37	22.05	15	0.56	1.2e-02
Sub1	284.07	193.13	0.56	3.8e-07
Arpp21	76.92	52.44	0.56	7.4e-05
Rnf113a1	13.68	9.35	0.56	4.6e-02
Zfand2a	129.47	88.15	0.55	7.2e-06
D030056L22Rik	31.7	21.5	0.55	3.8e-03
Pkm	1163.2	798.54	0.55	5.5e-07
Fam207a	42.69	29.38	0.55	2.4e-03
E530011L22Rik	17.38	11.84	0.55	2.5e-02
AI854703	79.9	54.48	0.55	9.2e-05
A230050P20Rik	66.63	46.06	0.55	3.4e-04
Maneal	41.87	28.53	0.55	1.1e-03
Sppl3	68.71	46.86	0.55	2.3e-04
Sirt5	19.87	13.56	0.55	1.8e-02
Prmt8	43.93	29.92	0.55	9.2e-04
Txn2	138.74	95	0.55	7.4e-05
Ccdc32	66.49	45.31	0.55	1.6e-04
Cdk4	49.26	33.83	0.55	1.3e-03
Map2k5	44.72	30.5	0.55	8.7e-04
Scoc	93.76	64.59	0.55	4.2e-05
Nol3	38.5	26.85	0.55	3.0e-03
Mtfr1l	120.23	81.97	0.55	2.2e-05
Krt1	23.85	16.32	0.55	1.2e-02
Slc35c2	41.54	28.46	0.55	1.3e-03
Tceal1	72.17	49.39	0.55	3.8e-04
5730409E04Rik	171.07	116.96	0.55	5.5e-06
Peg13	972.86	663.15	0.55	4.4e-08
Mgat3	285.72	194.99	0.55	4.7e-07
Kdelr2	26.85	18.31	0.55	6.9e-03
Tbcb	104.27	71.8	0.55	6.9e-05
Zmiz2	316.47	217.97	0.55	1.3e-06
Morn2	13.53	9.24	0.55	4.9e-02
Wdr36	60.67	41.69	0.55	3.1e-04
Btf3	47.4	32.33	0.55	7.2e-04
Rusc1	157.22	107.45	0.55	4.6e-06
B4galt7	24.16	16.5	0.55	9.5e-03
Guk1	105.79	72.67	0.55	8.4e-05
Chpf2	33.06	22.68	0.55	3.7e-03
Suclg1	149.48	102.02	0.55	5.5e-06
Asna1	98.48	67.55	0.55	6.4e-05
Pqbp1	69.97	47.97	0.55	1.8e-04
Coro2a	88.81	60.5	0.55	5.4e-05
Fbxl16	589.35	405.37	0.55	4.4e-07
Adcy5	327.71	224.14	0.55	4.0e-07
Ndrg4	1933.58	1324.65	0.55	2.2e-07
Ube2q1	178.96	122.09	0.55	2.9e-06
Gdap1l1	127.3	87.4	0.55	1.9e-05
Acsl5	33.71	23.21	0.55	7.7e-03
Sh3glb2	211.66	147.62	0.55	2.2e-05
Rsl1d1	85.96	59.03	0.55	6.0e-05
Rpl30	18.2	12.47	0.55	2.3e-02
Fam20c	45.43	31.36	0.55	1.1e-03
Gm13509	17.63	12.02	0.55	2.6e-02
Epn1	419.45	293.84	0.55	9.4e-06
Smyd5	73.82	50.47	0.55	1.2e-04
Synpr	62.33	41.72	0.55	1.2e-03
Gga3	133.06	90.87	0.55	1.6e-05
Srrm1	129.06	88.17	0.55	1.3e-05
Cntn4	27.69	19.01	0.55	6.2e-03
Lamtor5	28.29	19.29	0.55	6.4e-03
Ctsb	346.94	237.35	0.55	3.5e-07
Glra3	76.13	53.44	0.55	3.3e-04
Ppfia3	200.42	139.16	0.55	1.9e-05
Med16	76.41	52.73	0.55	2.3e-04
Xbp1	97.78	66.49	0.55	1.9e-04
Rpp25l	23.15	16.16	0.55	2.1e-02
Lgals8	94.55	63.9	0.55	8.4e-05
Armcx1	90.76	61.9	0.55	5.4e-05
Pdzd4	180.45	123.84	0.55	6.7e-06
Mesd	63.32	43.32	0.55	2.3e-04
Ptges2	40.85	28.33	0.55	3.0e-03
Naxe	50.55	35.01	0.55	9.3e-04
Mrps6	35.81	24.44	0.55	2.9e-03
Dynlt3	168.79	114.9	0.55	4.2e-06
Ppp1ca	227.86	156.42	0.55	3.5e-06
Fam98b	43.72	30.02	0.55	1.1e-03
Ppa1	136.05	93.13	0.55	8.7e-06
Arsa	28.43	19.33	0.55	6.7e-03
Tmem258	13.71	9.38	0.55	5.0e-02
Mrpl4	42.33	29.37	0.55	2.7e-03
Disp3	50.79	34.92	0.54	7.5e-04
Numbl	156.02	108.95	0.54	2.7e-05
Enox1	44.09	30.21	0.54	1.1e-03
Prrc2b	1359	935.03	0.54	3.9e-07
Mef2d	355.11	243.89	0.54	5.8e-07
Cwf19l1	24.1	16.46	0.54	1.2e-02
Pgp	85.61	63.42	0.54	1.6e-03
Ensa	468.16	320.92	0.54	2.8e-07
Mfsd14b	59.37	40.82	0.54	3.3e-04
Eif2b3	30.2	20.48	0.54	6.1e-03
Tmem65	215.75	145.65	0.54	2.8e-05
Pcbp1	227.44	160.43	0.54	7.9e-05
Gap43	756.67	519.62	0.54	5.0e-07
Dalrd3	55.84	39.1	0.54	1.2e-03
Dut	39.2	26.98	0.54	4.4e-03
Ywhah	587.43	403.61	0.54	4.1e-07
Mrpl38	67.38	46.78	0.54	3.2e-04
Ntmt1	32.83	23.03	0.54	8.9e-03
Rasgrf2	1025.64	708.29	0.54	8.5e-08
Borcs5	48.2	33.21	0.54	3.4e-03
Tor1a	27.11	18.69	0.54	7.7e-03
Triqk	44.62	31.16	0.54	1.5e-03
Bcat1	368.89	253.45	0.54	3.9e-07
Wfs1	77.93	53.76	0.54	1.3e-04
Plk3	24.04	16.67	0.54	1.4e-02
Ptpa	430.51	297.87	0.54	2.2e-06
Cnnm1	98.55	67.85	0.54	4.2e-05
Ccdc6	244.36	167.43	0.54	1.8e-06
Vwa5b2	46.12	31.83	0.54	1.1e-03
Ndufv1	212.09	147.24	0.54	4.3e-05
Gpr135	28.81	19.8	0.54	6.3e-03
Dlgap3	176.13	124.2	0.54	5.0e-05
Dnaja2	255.58	174.66	0.54	2.3e-06
Ip6k2	144.14	99.65	0.54	2.8e-05
Ndufv3	85.36	58.95	0.54	1.2e-04
Ncs1	912.53	627.77	0.54	1.4e-07
Kifap3	503.77	348.56	0.54	3.3e-07
Ndufv2	205.23	141.92	0.54	4.7e-06
Pgam1	19.86	13.79	0.54	2.5e-02
Rnd1	43.65	29.91	0.54	1.4e-03
Arl16	43.88	30.19	0.54	1.3e-03
Fxr2	243.03	169.14	0.54	2.1e-05
Ptprn	387.29	268.2	0.54	6.4e-07
Zfp365	366.01	252.29	0.54	5.0e-07
Inafm1	60.76	43.31	0.54	1.9e-03
Fgf9	30.67	20.98	0.54	5.3e-03
Eif3k	108.09	74.67	0.54	3.8e-05
Smn1	21.4	14.74	0.54	1.9e-02
Arhgap33	95.82	66	0.54	4.9e-05
Zfp954	20.58	14.17	0.54	1.8e-02
Zbtb45	40.51	28.31	0.54	3.3e-03
Trim3	153.25	107.02	0.54	3.9e-05
Ftsj3	38.94	26.82	0.54	2.1e-03
Tonsl	16.94	11.7	0.54	3.2e-02
Hps6	22.43	15.6	0.54	1.6e-02
Abhd12	162.29	111.77	0.54	1.1e-05
Rnf41	195.04	134.53	0.54	1.3e-05
Wsb2	231.91	160.2	0.54	3.8e-06
Slc25a3	504.57	348.12	0.54	6.2e-07
Nop2	44.66	30.89	0.54	1.7e-03
Fastk	61.99	43.45	0.54	9.6e-04
Use1	69.31	49.3	0.54	1.6e-03
Dda1	84.91	59.46	0.54	2.4e-04
Mrpl37	47.44	32.85	0.54	1.5e-03
Dpm2	29.25	20.2	0.54	6.4e-03
Eif2ak1	76.23	52.49	0.54	1.5e-04
Rex1bd	30.84	21.72	0.54	7.9e-03
Cltb	240.53	166.74	0.54	3.6e-06
Tmem151a	104.77	73.94	0.54	2.4e-04
Ufsp2	44.93	31.09	0.53	1.3e-03
Ctbp1	379.25	263.86	0.53	4.5e-06
Slc25a19	44.51	30.77	0.53	1.8e-03
Noa1	32.1	22.17	0.53	4.7e-03
Calcr	28.88	19.32	0.53	3.4e-02
Ndufb10	79.42	55.1	0.53	1.1e-03
Ciapin1	106.25	73.57	0.53	8.7e-05
Exosc4	24.82	17.68	0.53	2.1e-02
Pnpo	104.35	72.01	0.53	4.0e-05
Dhps	53.14	36.9	0.53	8.0e-04
Rab15	271.35	187.43	0.53	4.9e-06
Cs	404.81	278.94	0.53	1.5e-06
Chrna7	21.13	14.63	0.53	1.9e-02
Slc25a39	171.79	120.71	0.53	1.0e-04
Timm9	39.44	27.29	0.53	2.2e-03
Hpcal1	209.65	142.83	0.53	6.8e-06
Gmip	24.59	17.03	0.53	2.7e-02
Ablim2	164.71	114.77	0.53	4.2e-05
Bag2	18.77	12.97	0.53	2.7e-02
Arfip2	138.41	95.67	0.53	2.8e-05
Podxl2	156.87	110.68	0.53	4.3e-05
Rbm15b	106.95	74.1	0.53	4.3e-05
Tango2	136.98	94.8	0.53	3.2e-05
Snap47	850.93	589.17	0.53	2.9e-07
Ifngr2	45.08	31.09	0.53	2.0e-03
Emc9	20.45	14.38	0.53	2.7e-02
Zfp667	54.14	37.31	0.53	6.8e-04
2310022A10Rik	49.91	34.73	0.53	1.8e-03
Dpp10	158.62	111.05	0.53	1.8e-05
Rnf25	65.23	45.12	0.53	3.5e-04
Armc6	46.33	32.78	0.53	3.4e-03
Eif3h	129.15	89.27	0.53	2.8e-05
Ankrd9	17.35	12.4	0.53	4.4e-02
Pcmt1	258.34	178.62	0.53	1.8e-06
Rtn3	1007.38	698.88	0.53	1.8e-07
Tmem234	46.49	32.19	0.53	1.2e-03
Nt5m	51.79	36.24	0.53	2.3e-03
Clstn1	590.64	410.57	0.53	5.7e-07
Sh3rf1	109.98	76.14	0.53	3.6e-05
Snrpd3	88.84	61.37	0.53	1.4e-04
Nicn1	223.88	155	0.53	2.8e-06
L1cam	180.74	125.17	0.53	5.7e-06
Clta	251.39	175.7	0.53	8.8e-06
Hnrnpr	118.41	81.79	0.53	2.9e-05
Ppme1	280.19	194.17	0.53	1.8e-06
Mrpl10	95.29	66.17	0.53	1.4e-04
Smpd1	74.57	51.77	0.53	2.0e-04
Rrp1	360.48	252.34	0.53	6.9e-06
Smg5	150.08	103.92	0.53	1.1e-05
Ilf3	172.94	119.81	0.53	6.9e-06
Tcf7l2	44.4	30.84	0.53	1.6e-03
Mzt2	22.13	15.42	0.53	1.9e-02
Gal3st3	19.89	13.94	0.53	2.5e-02
Fam185a	43.16	29.81	0.53	1.8e-03
Srxn1	206.88	143.63	0.53	7.9e-06
Smim7	83.58	57.87	0.53	1.2e-04
Ring1	21.14	14.89	0.53	2.3e-02
Dok4	20.31	14.22	0.53	2.5e-02
Mrto4	24.52	17.03	0.53	1.3e-02
Large1	102.69	71.08	0.53	6.0e-05
Chchd6	73.2	51.88	0.53	1.8e-03
Fuom	26.87	18.74	0.53	1.4e-02
Rasgef1c	22	15.39	0.53	2.2e-02
Camsap2	539.88	380.36	0.53	2.9e-06
Rwdd2a	91.86	63.67	0.53	9.5e-05
Fam220a	42.09	29.26	0.53	2.2e-03
D17H6S53E	17.77	12.31	0.53	3.2e-02
Vdac3	59.43	41.07	0.53	5.4e-04
Chtf8	89.96	62.53	0.53	1.3e-04
Gadd45gip1	31.12	22.01	0.53	7.7e-03
Rab4a	65.77	45.96	0.53	5.7e-04
Znhit2	36.54	26.28	0.53	7.2e-03
Klhdc3	213.69	150.99	0.53	6.9e-05
Dctn5	118.76	82.48	0.53	3.1e-05
Dapk1	205.54	142.72	0.53	4.5e-06
Gtf2f1	46.34	32.24	0.53	1.4e-03
Nprl2	39.33	27.36	0.53	2.7e-03
Utp4	40.21	27.96	0.53	2.4e-03
Cgref1	25.74	17.78	0.53	1.2e-02
Ctnna2	251.28	174.52	0.53	2.5e-06
Dlk2	22.5	15.93	0.52	2.2e-02
Pnkd	228.03	160.43	0.52	2.1e-05
Mtx2	53.24	36.97	0.52	8.7e-04
Ppp3cb	421.59	293.78	0.52	7.3e-07
Gdi1	1030.05	715.81	0.52	2.1e-07
Ccdc71	68.27	47.5	0.52	3.2e-04
Pex26	39.22	27.29	0.52	2.8e-03
Klhdc8b	86.53	61.08	0.52	7.7e-04
Ola1	122.9	86.6	0.52	5.4e-05
Hspd1	79.87	55.43	0.52	1.9e-04
Uros	37.43	25.99	0.52	3.8e-03
Hsp90ab1	1775	1235.34	0.52	5.3e-07
Dynll2	1228.8	856.18	0.52	8.1e-07
Spats2	38.47	26.7	0.52	3.8e-03
Car11	29.49	20.84	0.52	1.3e-02
Rcan1	119.63	83.4	0.52	8.3e-05
Nelfb	134.28	93.59	0.52	3.7e-05
Hap1	2360.28	1657.61	0.52	2.2e-06
Elk1	88.12	61.2	0.52	2.0e-04
Ift20	44.95	31.35	0.52	1.8e-03
Klhl2	119.32	82.45	0.52	1.9e-04
Ppp1r12c	135.32	96.28	0.52	1.5e-04
Nell1	65.9	45.8	0.52	4.5e-04
Osbpl10	34.38	24.38	0.52	8.3e-03
Zc3h13	85.35	59.54	0.52	1.5e-04
Siah2	26.98	18.8	0.52	1.2e-02
Syt6	112.6	78.68	0.52	7.9e-05
Emc6	46.27	32.64	0.52	3.9e-03
Wdr73	43.2	30.07	0.52	2.5e-03
Eef1a2	1446.54	1020.4	0.52	1.9e-06
Snd1	149.9	105.73	0.52	7.6e-05
Srek1ip1	37.77	26.22	0.52	3.6e-03
Mrpl40	23.46	16.38	0.52	1.7e-02
Gm20604	26.57	18.55	0.52	1.1e-02
Cdc5l	51.38	35.98	0.52	1.1e-03
Ccndbp1	95.08	66.28	0.52	1.0e-04
Gpd1l	202.13	140.99	0.52	6.7e-06
Emb	34.75	24.44	0.52	4.8e-03
Arel1	113.64	79.48	0.52	5.0e-05
Syngr1	514.79	360.19	0.52	7.4e-07
Dhcr24	99.35	69.81	0.52	1.2e-04
Arfgap1	144.19	101.31	0.52	4.0e-05
Pepd	57.98	40.47	0.52	1.3e-03
Ndufa12	36.15	25.19	0.52	5.0e-03
Dgcr2	109.74	76.63	0.52	6.9e-05
Rnft2	85.99	60.41	0.52	2.4e-04
Tpgs1	49.87	36.92	0.52	6.3e-03
Ubac1	50	34.93	0.52	1.5e-03
Napg	316.15	220.96	0.52	2.0e-06
Rtn1	995.43	697.21	0.52	4.1e-07
Thap4	31.22	21.93	0.52	7.5e-03
Daxx	39.89	27.93	0.52	3.1e-03
Tcea2	33.06	23.1	0.52	6.1e-03
Slc25a42	45.76	32.02	0.52	1.9e-03
1500011K16Rik	26.11	18.28	0.52	3.6e-02
Crcp	35.12	24.51	0.52	4.9e-03
Ube2e1	61.53	43.03	0.52	5.9e-04
Rab11b	86.16	60.3	0.52	2.1e-04
Pom121	54.86	38.53	0.52	1.2e-03
Pgls	31.58	23.12	0.52	1.6e-02
Nudt10	54.34	37.67	0.52	1.3e-03
Uspl1	69.45	48.78	0.51	4.2e-04
Poldip2	131.61	92.19	0.51	3.7e-05
BC005624	50.34	35.27	0.51	1.4e-03
Wdr6	1494.46	1059.07	0.51	1.1e-05
Kif3a	253.02	177.44	0.51	4.4e-06
Comt	61.2	42.92	0.51	6.6e-04
Tspan13	91.31	63.9	0.51	2.3e-04
Lrrc59	169.05	118.35	0.51	1.6e-05
Agpat1	105.45	74.86	0.51	2.0e-04
Dgkd	159.66	111.6	0.51	2.1e-05
Sh3bp5l	94.73	66.93	0.51	2.8e-04
Slc4a10	143.32	100.46	0.51	2.5e-05
Arhgdia	653.57	461.56	0.51	3.1e-06
Smim10l2a	54.98	38.48	0.51	1.0e-03
Parp6	142.26	99.94	0.51	3.0e-05
Knop1	24.99	17.43	0.51	1.5e-02
Htr2a	26.4	18.71	0.51	1.3e-02
9330102E08Rik	19.8	14.19	0.51	3.6e-02
Ogfod2	25.93	18.79	0.51	3.4e-02
Flywch2	32.8	23.15	0.51	6.8e-03
Rab12	145.98	102.11	0.51	2.7e-05
Rapgefl1	150.91	106.42	0.51	4.2e-05
Sdf2	31.25	22.06	0.51	8.5e-03
Pmm1	123.64	87.85	0.51	1.5e-04
Rrp12	85.96	60.29	0.51	2.1e-04
Fbxl19	86.72	61.15	0.51	2.1e-04
Ppp4c	45.73	32.29	0.51	4.6e-03
Atp6ap1	172.22	120.89	0.51	1.6e-05
Psmb3	23.48	16.59	0.51	2.1e-02
Mrps7	58.45	41.11	0.51	9.2e-04
Wnt5a	26.05	18.18	0.51	2.6e-02
Trim45	43.1	30.4	0.51	5.3e-03
Vamp4	243.29	171	0.51	5.5e-06
Tmem222	66.41	46.78	0.51	5.7e-04
Sphk2	57.98	41.11	0.51	1.5e-03
Tmsb4x	455.37	317.78	0.51	1.2e-05
Higd1a	48.55	33.88	0.51	2.2e-03
Faim2	772.55	545.6	0.51	1.7e-06
Btbd2	156.06	110.26	0.51	3.4e-05
Entpd3	17.1	12.01	0.51	4.3e-02
Ssr4	26.21	18.5	0.51	1.6e-02
Stk16	70.35	49.82	0.51	9.1e-04
Agk	16.76	11.7	0.51	4.6e-02
Txndc5	58.57	41.17	0.51	1.1e-03
Nkrf	98.37	70.63	0.51	4.4e-04
Abt1	29.23	20.68	0.51	1.3e-02
Rbbp7	150	104.88	0.51	3.3e-05
Pycr2	33.95	23.94	0.51	6.4e-03
Hnrnpa0	269.32	190.5	0.51	5.0e-05
Mcee	16.32	11.47	0.51	4.7e-02
Grem2	42.37	29.77	0.51	4.1e-03
Shf	33.98	24.34	0.51	8.3e-03
Rabl6	227.63	160.66	0.51	2.5e-05
Gnb5	159.74	112.54	0.51	2.9e-05
Shisa6	18.53	13.04	0.51	3.5e-02
Lrtm2	71.51	50.39	0.51	4.4e-04
Scyl1	107.56	76.33	0.51	2.1e-04
Unc45a	42.24	30.13	0.51	4.1e-03
Mrpl30	63.35	44.54	0.51	8.1e-04
Bloc1s6	67.82	47.64	0.51	5.3e-04
Tkfc	22.01	15.62	0.51	2.8e-02
Ankrd11	319.52	224.78	0.51	5.4e-06
Cd200	153.29	108.14	0.51	3.0e-05
Cacybp	137.76	96.89	0.51	3.8e-05
Edc3	61.32	43.14	0.51	8.3e-04
Plppr3	71.27	50.91	0.51	9.2e-04
Pex14	26.47	18.91	0.51	1.9e-02
Zrsr2	64.23	44.96	0.51	9.3e-04
Med4	22.25	15.67	0.51	2.3e-02
G3bp1	161.58	113.72	0.51	2.6e-05
Eef1a1	1223.87	862.92	0.51	9.8e-07
4931428F04Rik	38.8	27.35	0.51	4.3e-03
Tsg101	42.18	29.67	0.51	3.7e-03
Dtx1	237.13	170.78	0.51	6.8e-05
Bcl11a	42.74	29.99	0.51	3.8e-03
Lancl1	202.88	142.48	0.5	2.6e-05
Tmem63b	62.57	44.47	0.5	1.5e-03
Atat1	53.35	37.61	0.5	1.3e-03
Prpsap2	32.29	22.76	0.5	7.6e-03
Stim1	144.9	102.24	0.5	4.5e-05
Rtf1	146.92	103.5	0.5	3.4e-05
Pcdh8	35.12	25.18	0.5	8.3e-03
Dgcr6	52.9	37.72	0.5	2.8e-03
Nip7	30.72	21.63	0.5	9.5e-03
Klc1	657.4	466.15	0.5	1.8e-06
Prps1	125.36	88.51	0.5	5.9e-05
Maf1	86.47	61.61	0.5	6.3e-04
Sept5	378.61	269.05	0.5	1.8e-05
Pgs1	99.96	71.08	0.5	2.4e-04
Chmp7	185.54	131.04	0.5	3.7e-05
Rheb	161.81	114.24	0.5	4.1e-05
Gabarap	195.09	137.88	0.5	1.5e-05
4930539E08Rik	23.37	16.67	0.5	2.3e-02
Ppif	35.68	25.16	0.5	5.8e-03
Gda	563.77	403.49	0.5	2.3e-06
Rexo1	65.6	46.63	0.5	8.7e-04
Gabbr2	167.47	117.57	0.5	7.1e-05
Ppp6r1	190.49	134.39	0.5	1.6e-05
Fam174b	21.39	15.06	0.5	2.9e-02
Usp14	302.04	213.62	0.5	4.6e-06
Klhl12	68.46	48.25	0.5	5.7e-04
Arf4	186.5	131.69	0.5	1.7e-05
Smg9	24.9	17.73	0.5	1.9e-02
Ing2	28.79	20.15	0.5	1.6e-02
Nova2	190.53	134.75	0.5	1.8e-05
Rtf2	78.54	55.78	0.5	1.4e-03
Carmil2	58.65	42.66	0.5	2.8e-03
Cox19	56.6	39.99	0.5	1.2e-03
Ltbp4	40.34	29.04	0.5	7.4e-03
Ebna1bp2	73.4	51.7	0.5	7.2e-04
Psmd8	104.44	73.96	0.5	1.8e-04
Efcc1	23.03	16.4	0.5	2.5e-02
Micu3	214.06	149.58	0.5	1.8e-05
Wdr47	262.08	185.49	0.5	7.0e-06
Zmat2	156.61	110.71	0.5	3.0e-05
Mat2b	88.39	62.11	0.5	3.8e-04
Lmtk3	128.1	92.42	0.5	2.1e-04
[truncated: 51,805 more rows]
