# Supplementary material for: Cross-species analysis defines the conservation of anatomically segregated VMH neuron populations
Source: eLife journal article supplement (doi:10.7554/elife.69065), 2021-05-21
Supplement: supp [file elife-69065-supp-v1.zip › elife_poa_e69065_Supplementary_file_6.csv]

Gene	Bead	Sup	Enrichment	P
Olfr263	0.61	0.06	3.7	5.3e-06
Apol7e	0.96	0.1	3.33	1.3e-07
4930405L22Rik	0.28	0.03	3.28	1.3e-03
Nr5a1os	17.31	2.1	3.12	2.2e-43
Hmcn2	92.79	11.06	3.08	9.6e-160
Tll2	29.47	3.66	3.07	1.9e-64
Nr5a1	39.39	6.08	2.94	4.2e-35
Gpr149	262.42	35.51	2.91	1.6e-196
Gpx6	0.81	0.14	2.84	6.0e-07
Umodl1	7.49	1.03	2.83	2.4e-39
Gjb3	0.79	0.1	2.83	7.1e-07
Cib3	0.71	0.1	2.69	3.7e-05
Rai14	74.42	12.57	2.65	2.2e-49
Prss30	13.36	2.21	2.65	2.2e-70
Hs3st3b1	17.98	2.95	2.63	1.8e-87
Olfr313	0.19	0.04	2.6	4.6e-02
Megf11	344.78	58.57	2.54	8.3e-221
Rab38	8.49	1.49	2.51	9.6e-55
Tmem61	0.52	0.08	2.5	4.5e-03
Kank4os	2.01	0.37	2.45	2.6e-11
Ankrd33b	22.93	4.28	2.44	2.1e-55
Retn	11.48	2.23	2.44	2.0e-35
Trim40	0.43	0.07	2.41	3.7e-03
Acp7	5.44	1.02	2.41	2.8e-27
Ccnjl	51.99	9.92	2.39	4.1e-62
7330404K18Rik	0.52	0.1	2.35	1.4e-03
Cryge	1.69	0.34	2.33	8.9e-08
Slit3	880.12	170.22	2.33	3.6e-138
Fam83b	7.11	1.55	2.32	4.0e-22
Lemd1	120.61	23.81	2.31	1.0e-120
4933431M02Rik	3.26	0.69	2.29	1.5e-14
Zfp831	51.17	10.5	2.29	3.6e-129
U90926	0.25	0.04	2.28	4.5e-02
A730049H05Rik	8.4	1.74	2.22	2.7e-25
Akr1cl	5.02	1.14	2.19	5.6e-14
1700037F24Rik	1.41	0.31	2.19	2.9e-07
Tnfrsf8	24.71	5.65	2.18	7.6e-52
Acaa1b	4.85	1.19	2.17	3.3e-18
Hs3st4	1123.19	259.51	2.12	1.8e-201
Wnt8a	0.31	0.07	2.1	2.2e-02
Fabp6	0.63	0.13	2.09	1.2e-02
Hsd17b2	8.52	2.01	2.08	7.6e-24
Satb2	90.82	21.77	2.08	6.8e-68
Ssxb3	0.41	0.12	2.06	2.3e-02
Unc45b	11.01	2.45	2.06	2.0e-08
Glra1	140.28	33.51	2.05	6.3e-196
Lama1	94.29	22.93	2.05	1.2e-122
A830029E22Rik	0.45	0.11	2.04	6.9e-03
Mcemp1	1.17	0.33	2.03	9.3e-06
Cfap73	14.27	3.58	2.02	1.5e-34
Psg29	0.27	0.08	2.01	3.7e-02
Wnt10b	0.64	0.15	2	1.3e-03
Il23a	0.85	0.22	1.99	1.3e-04
Foxn1	0.63	0.18	1.99	4.1e-04
Tyr	1.5	0.45	1.95	1.9e-06
Adamts9	78.85	20.11	1.94	3.1e-60
Rin1	8.24	2.12	1.94	1.0e-27
Hipk4	32.13	8.52	1.92	4.3e-82
Spink7	0.35	0.09	1.91	2.3e-02
Fermt1	20.36	5.52	1.91	2.6e-60
Olfr1406	1.46	0.38	1.9	2.7e-06
Mst1r	5.13	1.4	1.9	2.1e-20
Fndc1	136.2	35.81	1.88	2.6e-77
She	2.1	0.57	1.87	9.7e-05
E330035G20Rik	0.41	0.1	1.86	2.8e-02
Steap3	27.84	7.56	1.85	6.7e-25
Oprd1	32.33	8.73	1.84	1.5e-58
Oosp3	0.38	0.12	1.84	2.9e-02
Disp3	105.69	29.76	1.84	5.4e-125
Espnl	0.34	0.1	1.83	2.1e-02
Hydin	164.01	45.62	1.83	4.0e-36
Lcorl	612.65	174.22	1.83	1.5e-175
4933415A04Rik	1.53	0.44	1.81	2.4e-07
Vmn2r38	3.27	0.87	1.8	6.8e-11
Rbfox1	7287.83	2110.81	1.78	0.0e+00
Kcnv2	6.57	1.87	1.77	5.4e-18
AU017674	1.34	0.39	1.77	2.7e-05
1700031A10Rik	0.47	0.14	1.76	2.3e-02
Slc9b2	44.73	13.3	1.76	7.7e-87
Spint1	7.27	2.23	1.74	9.3e-16
Cdh4	700.95	211.18	1.74	5.3e-116
Ankrd34b	53.08	16.08	1.72	1.9e-26
Catsperg2	9.06	2.76	1.72	1.4e-13
Nptx2	60.46	21.49	1.71	3.0e-18
Qrfpr	62.4	19.73	1.7	2.6e-35
Nectin3	158.59	48.34	1.7	1.2e-133
Tenm2	6805.79	2109.27	1.7	2.0e-95
2310075C17Rik	0.66	0.23	1.69	2.9e-03
4930556I23Rik	0.63	0.17	1.68	1.0e-02
Kcnb2	2092.17	655.37	1.67	7.2e-204
Cnr1	148.09	44.86	1.66	3.5e-36
Dscc1	1.28	0.42	1.65	5.1e-05
Glipr1	29.48	9.65	1.64	1.4e-45
Adrb3	7.52	2.5	1.64	3.0e-21
G930045G22Rik	1.7	0.42	1.64	1.1e-04
Gpr150	15.9	5.19	1.64	1.4e-18
Gcsam	1.05	0.35	1.64	2.5e-04
Cacna2d1	1513.05	484.47	1.64	1.6e-136
B930018H19Rik	4.51	1.33	1.63	2.7e-07
Traip	58.27	18.86	1.63	1.1e-51
Lrrn4	3.48	1.14	1.61	2.4e-09
Kcna10	0.86	0.28	1.61	6.4e-04
Banf2	146.52	48.36	1.61	7.4e-85
Samd7	5.59	1.83	1.6	1.1e-11
1700057H21Rik	0.76	0.25	1.6	6.2e-03
Gypa	12.74	4.29	1.6	9.5e-26
BC051537	0.97	0.31	1.6	1.6e-03
D630023F18Rik	20.72	6.73	1.6	4.8e-53
A26c2	0.75	0.28	1.59	1.4e-03
Neurod4	0.43	0.14	1.59	2.9e-02
Rerg	171.19	56.63	1.59	7.5e-156
2310034O05Rik	0.44	0.15	1.59	2.0e-02
Ttll2	0.73	0.27	1.58	6.4e-03
Rasal1	80.8	26.76	1.58	6.9e-86
Opcml	2942.28	997.74	1.58	4.2e-75
Fer1l4	2.09	0.48	1.58	2.0e-03
Rtp4	18.15	6.39	1.57	3.3e-14
C030017D09Rik	0.89	0.3	1.57	6.5e-04
9230117E06Rik	2.8	0.96	1.56	2.7e-09
Camkv	386.01	137.5	1.56	4.7e-85
Nr0b1	6.01	2.34	1.55	1.6e-08
Chrna7	74.33	25.4	1.54	2.3e-32
Sstr3	7.41	2.61	1.54	2.1e-15
Wnt1	1.41	0.53	1.54	7.6e-05
6430628N08Rik	12.44	4.2	1.54	6.9e-14
Sntg2	160.28	54.82	1.53	2.0e-125
4930401O12Rik	0.47	0.16	1.53	3.9e-02
Clrn1	4.48	1.59	1.53	5.6e-15
Doc2b	96.26	32.54	1.53	2.4e-46
Klhl31	2.03	0.67	1.53	1.2e-05
Gda	189.12	67.09	1.52	3.6e-55
D430036J16Rik	22.41	7.77	1.51	2.4e-47
Sct	1.1	0.47	1.51	2.0e-03
B020011L13Rik	0.75	0.29	1.51	2.4e-02
Tespa1	9.76	3.49	1.51	3.7e-11
Slc44a4	2.18	0.75	1.5	2.2e-03
4933413L06Rik	41.79	15.5	1.5	9.5e-44
Actn2	38.21	13.69	1.5	1.5e-65
Prr16	439.35	157.69	1.5	3.1e-41
Hsh2d	1.29	0.46	1.49	5.2e-03
Tgfbr3	154.98	55.25	1.49	2.1e-128
Adamdec1	0.6	0.18	1.49	3.7e-02
Olfr889	16.29	10.07	1.48	4.6e-08
4933440M02Rik	1.07	0.45	1.48	1.6e-03
Prkd1	291.32	103.6	1.48	2.7e-96
Gbgt1	2.13	0.7	1.48	4.4e-05
Vgll2	7.01	2.41	1.47	2.1e-06
Ldb2	601.76	214.95	1.47	2.3e-126
Zswim2	1.69	0.59	1.47	5.5e-06
Glra3	226.89	81.89	1.47	7.7e-62
Nek10	129.68	46.71	1.47	1.6e-108
Ap1m2	0.77	0.25	1.46	9.5e-03
Mhrt	12.27	4.37	1.46	7.0e-13
Hcrtr2	96.76	35.59	1.45	1.8e-45
Kir3dl2	22.99	8.41	1.45	4.3e-54
Apol8	6.21	2.41	1.45	7.2e-18
Ybx2	8.62	3.13	1.45	8.4e-20
Esyt3	83.2	30.96	1.45	6.8e-72
Defb23	1.7	0.66	1.44	3.7e-05
Pvt1	285.62	104.99	1.43	1.0e-74
4933428C19Rik	2.13	0.73	1.43	1.1e-04
Pate4	0.64	0.26	1.42	1.2e-02
Lamb3	22.36	8.57	1.42	3.0e-20
H2-Q2	40.97	17.39	1.42	3.3e-17
Adamts18	75.5	27.83	1.42	4.7e-85
Cdc20b	14.97	5.44	1.42	2.5e-12
Arpp21	505.43	189.35	1.42	3.9e-106
Cd96	1.92	0.73	1.42	1.1e-05
Pkp2	56	20.91	1.41	1.4e-71
Palmd	47.47	18.06	1.41	3.6e-29
Slc4a11	2.92	1.01	1.41	1.4e-06
Ano3	107	40.25	1.41	2.0e-110
9530026P05Rik	339.98	125.51	1.4	2.4e-61
E430024P14Rik	142.68	53.34	1.4	2.0e-68
Itpr1	269.63	101.5	1.4	2.7e-133
D030068K23Rik	160.07	59.68	1.4	3.0e-43
Gcm1	2.55	0.68	1.39	1.5e-02
Cnih3	53.03	20.36	1.39	1.1e-60
Pdia2	0.79	0.3	1.39	2.0e-02
Vmn2r84	4.5	1.68	1.39	1.9e-06
Chst8	104.67	40.52	1.39	2.4e-81
Camk1g	46.65	17.4	1.39	2.1e-32
Muc15	2.29	0.96	1.38	9.0e-05
Sel1l3	53.04	20.43	1.38	7.6e-77
Hs3st2	19.97	7.67	1.38	5.1e-16
Nkd2	13.83	5.26	1.37	3.1e-29
Slc24a4	47.7	17.63	1.37	3.0e-25
Zbtb7c	208.95	80.1	1.37	3.1e-102
Epsti1	12.44	4.98	1.37	1.1e-15
Kcnj5	12.1	4.77	1.37	3.2e-15
Chil3	2.14	0.79	1.36	1.2e-04
Atp6ap1l	4.15	1.81	1.36	1.2e-07
Lmo3	187	72.8	1.36	1.8e-84
Rasgrf2	433.83	165.95	1.36	6.8e-56
Kng1	1.56	0.56	1.36	2.1e-02
Acvr1c	46.14	18.7	1.36	1.2e-22
Ptpn3	54.17	22.01	1.36	1.6e-29
Mcm10	5.25	2.08	1.35	2.7e-08
Cdh13	1012.5	395.29	1.35	0.0e+00
Nr0b2	0.77	0.23	1.35	3.5e-02
Galnt18	304.47	119.06	1.35	9.2e-79
Kcnh7	924.53	363.82	1.34	1.6e-119
Ccdc187	37.29	14.64	1.34	1.8e-35
Rsph3a	147.18	57.8	1.33	1.9e-64
Rgs11	151.1	60.55	1.33	2.1e-84
Chrm5	2.36	1	1.32	1.6e-04
Adam33	6.39	2.6	1.32	2.4e-13
Krt18	4.62	2.15	1.32	5.3e-06
Rnf207	36	14.58	1.32	2.2e-19
Tcam1	1.46	0.55	1.32	4.5e-03
Hcn1	466.18	187.91	1.31	1.1e-238
Vsig2	0.53	0.22	1.31	3.6e-02
Cntn6	444.59	178.09	1.3	3.5e-42
Grm5	2223.48	902.16	1.3	2.1e-123
Amigo2	47.6	21.63	1.3	3.9e-15
Hcrtr1	9.86	4.3	1.3	1.6e-14
Galnt17	552.98	224.67	1.3	4.9e-250
Slc5a12	0.66	0.27	1.3	4.4e-02
Lgr5	28.93	11.54	1.3	8.3e-25
Trdc	0.62	0.23	1.29	4.2e-02
Plcz1	4.88	2.03	1.29	3.7e-10
Gabra5	170.53	70.47	1.29	2.6e-78
Atp6v1c2	15.83	6.44	1.29	1.8e-24
Tdrd5	19.54	7.9	1.29	7.6e-21
Btla	7.4	2.98	1.28	1.0e-07
Cckbr	15.77	6.47	1.28	7.2e-21
Fezf1	37.43	17.59	1.27	1.8e-13
A930003O13Rik	5.73	2.46	1.27	7.1e-13
Rgs14	12.13	5.13	1.27	1.0e-14
Angpt4	3.3	1.42	1.27	6.6e-06
Fam189a1	414.65	172.93	1.27	1.9e-159
Htr1b	24.96	10.24	1.27	7.1e-24
Shisa9	435.2	175.46	1.26	1.3e-80
Adgrl2	258.06	108	1.26	1.4e-148
Cryga	0.75	0.36	1.26	1.3e-02
Slc5a4a	0.76	0.35	1.26	1.2e-02
Kctd19	0.77	0.34	1.26	3.8e-02
Il5ra	2.77	1.14	1.26	5.9e-05
Sox5os2	22.93	9.87	1.26	1.0e-35
Etnk2	64.34	24.44	1.26	1.6e-17
Abhd12b	1.5	0.52	1.26	1.0e-02
P4ha3	47.55	19.1	1.26	3.3e-20
Dgkg	273.75	114.75	1.25	1.1e-162
Catsperz	1.84	0.75	1.25	3.1e-04
4930484H19Rik	1.47	0.6	1.25	5.4e-04
Nlrp9c	3.35	1.39	1.25	4.6e-07
Prss54	0.93	0.37	1.25	6.5e-03
Sox14	13.27	5.6	1.25	2.3e-12
Fbxo27	12.62	5.51	1.25	5.2e-19
Cylc1	0.66	0.27	1.24	4.1e-02
Myh7	18	8.08	1.24	2.0e-20
Cavin4	18.91	7.72	1.24	5.8e-20
Tcerg1l	116.61	47.81	1.23	1.5e-38
Fam126a	94.97	40.66	1.23	7.0e-59
Synpo	32.8	13.76	1.23	7.4e-34
Prmt8	45.19	19.09	1.23	6.0e-44
Galnt14	109.37	46.03	1.22	8.5e-35
4931419H13Rik	1.75	0.65	1.22	2.7e-03
Ddn	11.11	4.96	1.22	3.2e-08
Dpyd	477.91	207.08	1.22	1.6e-79
Gstm2	1.55	0.78	1.21	1.2e-03
Wbscr25	1.37	0.65	1.21	9.6e-04
4933432K03Rik	5.12	2.18	1.21	3.0e-09
Rab11fip1	9.66	4.09	1.21	8.4e-19
Edaradd	8.95	4.29	1.2	4.6e-07
Kcnq3	799.76	350.37	1.2	2.7e-155
Slc9a2	13.43	6.01	1.2	8.7e-13
Slit2	595.05	260.65	1.2	6.3e-35
Cntn4	1029.53	448.43	1.2	2.7e-35
Tmem145	218.7	95.49	1.2	2.0e-54
Naip1	0.9	0.39	1.2	2.3e-02
Scn5a	50.46	21.8	1.2	3.9e-26
Rxrg	48.22	21.37	1.2	1.5e-24
4933417O13Rik	1.83	0.83	1.19	3.9e-04
3100003L05Rik	4.92	2.28	1.19	3.9e-07
Mgst2	1.13	0.52	1.19	7.2e-03
Nrg3	5739.91	2529.12	1.19	3.6e-65
Ptprr	262.37	114.96	1.19	4.8e-58
Kcnn3	161.58	71.35	1.19	7.4e-128
Ros1	27.02	11.67	1.19	1.7e-19
Nrg3os	666.69	294.77	1.18	4.0e-65
Mcidas	1.35	0.54	1.18	2.4e-03
Deptor	174.86	77.64	1.18	1.8e-41
4930488N15Rik	1.14	0.45	1.17	1.0e-02
Atp4a	4.01	1.92	1.17	4.6e-06
St8sia2	33.21	14.39	1.17	6.9e-13
Napepld	45.32	20.13	1.17	1.4e-35
Rnf182	65.31	28.74	1.16	6.4e-37
Btbd11	266.31	118.93	1.16	1.5e-177
Deup1	15.97	7.09	1.16	1.1e-26
4933424G06Rik	63.14	28.76	1.16	9.3e-80
Camkk2	123.93	55.43	1.16	7.3e-90
Strip2	22.27	10.15	1.16	5.3e-27
Sgcz	3849.24	1736.69	1.16	3.3e-55
Smpdl3b	23.23	10.34	1.15	6.6e-17
Tvp23bos	1.42	0.61	1.15	2.9e-03
6820408C15Rik	26.51	12.08	1.15	1.1e-21
Ptpn18	17.55	8.13	1.14	1.5e-13
Car10	1216.78	552.83	1.14	1.8e-97
Mkx	38.85	17.77	1.14	8.4e-11
Kcnv1	6.88	3.18	1.14	1.0e-07
Zmat4	340.81	158.89	1.13	2.4e-35
Dll4	2.33	1.06	1.13	2.1e-04
Pbk	12.93	6.03	1.13	3.0e-07
Chrna4	9.96	4.55	1.13	1.4e-11
Taf7l	43.1	19.66	1.13	1.5e-27
Pifo	89.71	41.49	1.13	1.2e-65
Atrnl1	363.1	168.59	1.12	1.9e-82
Atp8a2	425.71	197.4	1.12	1.7e-99
Cdh6	112.39	51.62	1.12	7.8e-41
Tagap	9.6	4.15	1.12	4.0e-06
Ptk2b	29.81	14.21	1.12	2.3e-07
9530020I12Rik	0.93	0.4	1.12	3.2e-02
Sox5os4	96.02	46.76	1.11	5.4e-26
Kcnip2	79.09	36.49	1.11	1.3e-59
A730045E13Rik	1.07	0.47	1.11	3.1e-02
1110015O18Rik	7.48	3.83	1.11	2.1e-08
BC016579	3.78	1.69	1.11	1.0e-04
Macrod2os2	0.99	0.53	1.1	1.8e-02
Nr2f2	159.57	72.88	1.1	1.6e-40
3110009E18Rik	21.39	9.24	1.1	1.4e-12
Tekt5	11.73	5.87	1.1	1.6e-05
Nmur2	46.88	22.49	1.1	1.7e-35
Tenm4	969.93	453.74	1.1	2.3e-51
A730090N16Rik	9.3	4.23	1.1	1.7e-13
Itpka	12.84	5.77	1.1	2.3e-10
Rps6ka2	208.83	97.9	1.1	6.6e-146
Fam81a	52.51	24.71	1.09	1.0e-30
Cmbl	29.45	14.89	1.09	7.4e-17
Sept11	140.61	66.23	1.09	6.7e-72
1700003L19Rik	2.37	1.1	1.09	3.8e-03
Crhr2	13.84	6.3	1.09	3.0e-13
Vmn2r85	20.06	9.36	1.09	2.1e-13
Kcnh5	134.77	63.86	1.09	2.6e-79
Rasl11a	9.25	4.72	1.08	1.1e-04
Slc9b1	9.18	4.4	1.08	4.6e-07
A330015K06Rik	106.14	49.29	1.08	7.5e-29
Zan	11.25	5.4	1.08	1.1e-07
Iqgap2	68.13	32.51	1.08	9.0e-25
Kir3dl1	10.28	4.93	1.08	7.4e-10
Srrm4os	44.91	21.65	1.08	4.2e-28
Hs6st3	851.65	407.32	1.08	4.9e-71
Fhod3	231.83	110.81	1.08	1.8e-58
Mfsd13b	18.26	8.32	1.07	3.3e-12
Runx2os1	3.67	1.68	1.07	6.5e-05
Tox3	155.83	75.51	1.06	4.3e-33
A830092H15Rik	22.26	10.76	1.06	2.3e-18
Oprk1	45.89	21.75	1.06	4.5e-14
Pcsk4	34.6	15.91	1.06	1.7e-25
Efcc1	20.28	9.96	1.06	3.9e-20
Grhl1	25.18	11.94	1.06	9.3e-22
Terb2	0.97	0.47	1.05	2.0e-02
Baiap2	156.57	75.19	1.05	1.8e-74
Pebp4	8.55	4.09	1.05	6.9e-08
Lhfpl3	1198.04	578.19	1.05	5.9e-79
Myo1h	11.59	5.49	1.05	1.2e-08
Cdca7l	6.92	3.37	1.05	1.0e-04
Npm2	7.99	3.7	1.05	5.2e-07
Vmn2r86	1.88	0.88	1.05	1.6e-02
Atp10a	64.33	31.49	1.05	1.1e-23
Ajap1	100.26	48.18	1.05	2.5e-53
Tgm3	2.48	1.23	1.04	1.5e-03
Myo1b	49.29	23.99	1.04	8.2e-53
Zfp459	2.72	1.44	1.04	2.9e-04
Large1	830.86	405.63	1.04	8.3e-221
Tmeff1	159.03	77.71	1.04	1.3e-90
Grm7	2065.68	1018.82	1.03	1.1e-104
C430042M11Rik	0.65	0.34	1.03	5.0e-02
Pdgfc	72.11	35.29	1.03	1.8e-45
Asprv1	1.15	0.5	1.03	4.7e-02
Col8a1	42.67	20.46	1.03	3.4e-13
Piwil2	2.48	1.01	1.03	2.3e-02
Adamts17	118.65	58.03	1.03	4.1e-50
Tmco5	1.28	0.59	1.03	5.5e-03
Plekhg4	5.96	3.01	1.02	2.9e-09
Myc	3.77	1.91	1.02	3.9e-05
Tmem132d	411.03	203.07	1.02	7.3e-107
Pde8b	416.72	206.27	1.02	4.5e-151
Drp2	50.45	24.79	1.02	1.3e-26
Aanat	12.82	6.46	1.02	1.8e-10
Bdnf	43.26	22.08	1.01	9.8e-17
Ccdc88b	5.7	3	1.01	1.7e-05
4930447M23Rik	1.48	0.7	1.01	1.7e-02
Ltbp1	25.03	10.99	1.01	1.3e-06
Grip1os2	30.26	15.35	1.01	9.1e-25
Srrm4	294.01	149	1.01	2.9e-45
Rgsl1	3.81	1.82	1.01	5.1e-04
Grin2a	408.94	205.4	1.01	7.2e-59
Gabra4	70.77	35.69	1.01	6.4e-32
Tmem213	1.14	0.6	1.01	1.0e-02
Rreb1	173.03	85.93	1.01	1.3e-21
4930551O13Rik	5.2	2.57	1	9.7e-08
Gabrd	4.12	2.2	1	1.5e-05
Fgf9	27.77	14.06	1	2.5e-22
Cacna1e	665.49	337	0.99	3.7e-136
Spink13	11.89	5.61	0.99	3.1e-08
Sox5os3	2.83	1.41	0.99	2.1e-04
4921539E11Rik	3.62	1.88	0.99	9.3e-05
Rab26	78.48	40.83	0.99	2.7e-44
Faah	69.3	35.2	0.99	1.5e-55
Sorcs3	488.51	248.86	0.99	1.4e-60
Six4	1.56	0.83	0.99	8.9e-03
4930461C15Rik	1.21	0.61	0.98	1.2e-02
Barx2	11.49	6.04	0.98	5.9e-06
Gdnf	1.09	0.59	0.98	4.4e-02
Ccdc169	1.78	0.95	0.98	3.9e-03
Ryr2	532.6	268.12	0.98	3.6e-77
Evpl	18.12	8.98	0.98	5.3e-18
Dlgap2	649.47	333.48	0.98	1.7e-127
Sytl5	27.75	14.01	0.98	8.7e-22
Col26a1	45.15	23.31	0.98	2.7e-26
Pkd1l2	6.56	3.54	0.98	1.5e-04
Fxyd5	18.52	9.81	0.97	1.2e-10
Cacna1h	49.44	25.12	0.97	2.2e-40
Chil5	19.47	9.7	0.97	3.4e-12
Pcdh15	1749.14	909.49	0.97	1.5e-32
Zdhhc2	238.55	121.32	0.97	1.1e-32
L3mbtl4	60.61	31.53	0.96	8.3e-20
Msh3	99.61	51.01	0.96	1.6e-62
1700093K21Rik	3.87	2.03	0.96	8.6e-05
Gabrb3	1195.17	618.41	0.96	1.1e-178
2210420H20Rik	4.85	2.55	0.96	1.0e-05
Slc17a6	184.51	94.83	0.96	2.8e-31
Adcyap1	73.49	40.91	0.96	1.0e-13
A830011K09Rik	7.71	4	0.95	4.3e-11
Astn2	1168.2	603.01	0.95	4.2e-108
Cfi	1.7	0.86	0.95	3.0e-03
Pde6a	24.31	12.88	0.95	1.4e-17
Zfp385b	288.65	151	0.95	1.1e-19
Cadps2	462.19	237.17	0.94	1.1e-44
Pdzd3	1.47	0.78	0.94	7.6e-03
Hrh1	35.93	18.68	0.94	1.9e-17
Stard9	206.26	106.22	0.94	6.3e-69
A830082K12Rik	111.52	58.8	0.94	8.2e-29
Kcnab1	188.55	96.63	0.94	2.0e-43
Lingo2	3930.58	2079.79	0.94	6.3e-73
Fate1	1.16	0.63	0.94	2.5e-02
Fstl3	5.96	3.11	0.94	2.5e-05
Ppm1e	443.51	231.1	0.94	9.5e-76
Vill	5.17	2.64	0.93	1.4e-06
Grik4	297.07	155.33	0.93	8.8e-53
Chrm1	13.98	7.19	0.93	3.6e-08
9130409I23Rik	1.58	0.78	0.93	4.5e-02
Runx2	83.69	43.52	0.93	1.2e-27
Fstl4	397.75	201.67	0.93	2.5e-42
Atp6v1b1	1.2	0.68	0.93	2.5e-02
Ptger3	8.5	4.63	0.93	2.7e-10
Rnd3	52.75	27.69	0.92	3.2e-13
Gsg1	7.65	4.1	0.92	9.1e-09
Myrip	115.34	61.69	0.92	1.7e-48
Plcxd2	39.85	20.61	0.92	3.2e-17
1700034H15Rik	10.11	5.42	0.92	7.3e-09
Slc25a30	17.23	9.26	0.92	1.6e-19
Teddm2	11.63	5.79	0.92	6.6e-06
Lepr	29.14	16.66	0.92	4.8e-08
Wnt5a	17.03	9.07	0.92	8.2e-11
Noxred1	8.81	4.56	0.91	5.1e-08
Isyna1	79.85	44.57	0.91	2.0e-33
Prickle1	539.85	288.81	0.91	2.6e-48
Susd4	238.98	127.04	0.91	1.4e-93
Il1rapl1	2832.5	1520.61	0.91	7.9e-105
Gipc2	26.55	14.37	0.91	9.2e-21
Meox1	1.06	0.6	0.91	2.6e-02
Slc16a9	17.06	9.3	0.91	2.3e-08
4930401C15Rik	1.99	1.02	0.91	6.3e-03
Susd2	23.37	12.83	0.91	9.3e-22
Tmem266	53.57	28.32	0.91	3.4e-17
Fam185a	56.38	30.14	0.91	3.6e-54
Wdr95	21.44	11.83	0.9	1.1e-13
B430218F22Rik	1.15	0.67	0.9	2.1e-02
Pcsk6	31.59	16.48	0.9	2.1e-13
Tmem191c	310.42	165.82	0.9	6.0e-127
Epha5	841.19	450.74	0.9	5.6e-65
Dpysl4	57.12	30.76	0.9	9.1e-52
C130026L21Rik	44.3	23.76	0.9	1.9e-15
Amz1	33.57	17.75	0.9	3.4e-16
Phactr1	1146.84	621.03	0.9	1.7e-86
Kcnk4	6.24	3.42	0.89	1.8e-05
Ano5	75.07	40.89	0.89	2.4e-20
Cntn5	1885.44	1009.85	0.89	2.1e-43
Crybg2	2.03	1.04	0.89	8.7e-03
Polr3g	15.48	8.34	0.89	6.9e-16
Ddx4	3.52	1.82	0.89	1.1e-04
Hmgb4	1.15	0.67	0.89	3.8e-02
Nab2	12.05	6.53	0.89	1.4e-07
H2-T22	31	16.48	0.88	4.4e-11
AY358078	1	0.51	0.88	3.7e-02
Pstpip1	6.07	3.13	0.88	9.0e-05
Smco4	19.8	10.96	0.88	1.0e-09
Tmem30c	3.1	1.84	0.88	7.3e-04
Slc27a2	30.93	17.13	0.88	1.7e-23
Hes6	29.54	16.73	0.88	2.5e-17
Col20a1	7.57	3.97	0.88	7.1e-06
Prx	7.12	4.32	0.88	2.7e-04
Tnfrsf4	1.66	0.9	0.88	1.1e-02
Lrrd1	8.51	4.91	0.87	6.4e-09
Gpr119	1.97	1.16	0.87	4.0e-03
Coro2a	70.79	39.18	0.87	3.7e-46
Pde3a	31.68	17.22	0.87	2.8e-10
Slc16a11	174.38	97.94	0.87	6.0e-53
Sorbs2os	187.82	104.76	0.87	7.4e-42
Cyp2s1	5.9	3.28	0.87	2.6e-06
Lrrc37a	2.34	1.16	0.86	4.1e-02
Marveld2	8.55	4.6	0.86	3.5e-09
Il4	8.37	4.66	0.86	2.8e-08
Gabrb1	1754.75	967.91	0.86	2.1e-50
Tmem108	537.79	296.7	0.86	4.6e-118
Slc39a2	5.97	3.28	0.86	3.3e-04
Cdhr2	7.65	4.27	0.86	1.2e-09
Stxbp2	18.77	10.1	0.86	6.5e-17
Cacna1i	52.62	29.25	0.86	3.8e-35
Tspan17	72.77	40.75	0.86	7.0e-64
Grem2	36.4	20.16	0.85	5.1e-17
Mir124a-1hg	138.99	77.72	0.85	1.1e-28
Rbfox3	364.41	198.85	0.85	3.5e-64
Lrrfip1	249.27	138.69	0.85	1.1e-77
Cpne8	98.56	54.29	0.85	1.2e-27
Fcor	16.01	9.01	0.85	8.3e-14
Cabyr	10.99	5.82	0.85	2.3e-06
Plcb4	378.4	209.7	0.85	1.4e-39
Sh3rf3	143.16	80.21	0.85	3.9e-46
Grip1	912.23	504.2	0.85	2.2e-39
Tmem215	6.67	4.09	0.85	1.6e-04
Plch2	22.62	12.82	0.85	7.9e-12
Sh3gl3	124.35	68.47	0.85	2.9e-22
Apobec4	97.44	54.17	0.85	2.6e-56
Cmtm8	8.33	4.82	0.85	5.5e-06
Brinp3	1338.86	741.65	0.85	7.9e-61
Gas2	105.18	59.18	0.85	1.1e-43
Nlgn1	3808.7	2132.76	0.85	6.3e-73
Kif26b	181.58	102.35	0.84	4.5e-64
Ankar	2.92	1.53	0.84	1.7e-03
Rad18	41.32	23.17	0.84	1.6e-27
Matk	345.46	194.64	0.84	2.2e-67
Zfp46	23.99	13.04	0.84	4.4e-20
Mlip	22.58	12.83	0.84	2.8e-10
Cacna1c	720.2	406.32	0.84	4.1e-74
Tbc1d4	70.84	39.3	0.84	5.3e-23
Dapk1	294.9	165.68	0.84	3.1e-72
Serpina10	1.61	0.91	0.84	9.8e-03
Sec14l3	1.89	1.09	0.84	6.5e-03
D930020B18Rik	15.27	8.08	0.84	9.5e-11
2010300C02Rik	67.49	37.62	0.84	1.5e-39
Aven	49.27	27.64	0.84	4.8e-13
Ank3	2603.84	1472.15	0.84	4.6e-65
A330102I10Rik	163.34	94.46	0.84	8.0e-17
4930555F03Rik	489.49	275.7	0.83	1.5e-36
C130073E24Rik	563.84	317.6	0.83	8.0e-40
Xk	18.74	10.48	0.83	5.1e-12
B130046B21Rik	15.14	8.46	0.83	4.4e-10
Pcsk2os2	19.31	10.83	0.83	1.6e-11
Pcsk2os1	38.95	21.96	0.83	3.3e-18
Rph3al	36.53	20.51	0.83	7.7e-20
Sytl4	9.41	5.59	0.83	2.0e-04
Arsk	46.96	25.77	0.83	1.9e-13
Dgkb	1273.12	720.99	0.83	1.1e-31
Mycn	4.02	2.35	0.83	1.5e-03
Khdrbs2	645.98	364.84	0.83	1.8e-33
Map3k5	140.5	78.54	0.83	7.0e-34
Sema5a	145.54	81.53	0.82	8.5e-17
1700084F23Rik	3.52	1.95	0.82	5.3e-04
Asb12	2.34	1.45	0.82	2.2e-03
Fig4	65.39	36.34	0.82	8.0e-30
Tmem163	199.43	110.57	0.82	3.6e-26
BC018473	4.66	2.63	0.82	2.6e-03
Gpr39	7.05	3.99	0.82	2.1e-07
Aunip	2.87	1.65	0.82	8.9e-04
Nell2	254.44	144.64	0.82	1.8e-23
Sgpp2	41.17	23.98	0.82	1.0e-19
Plxna2	138	78.73	0.81	3.4e-38
Arntl2	79.43	45.1	0.81	1.0e-26
A630075F10Rik	1.54	0.85	0.81	2.3e-02
Defb1	1.59	1.04	0.81	3.2e-02
Syt7	103.13	59.59	0.81	2.4e-33
Pitpnm3	79.67	45.6	0.81	1.8e-29
Msc	2.01	1.14	0.81	8.4e-03
Tpo	8.26	4.83	0.81	4.0e-05
4930513D17Rik	7.36	4.36	0.81	3.5e-06
Trank1	258.32	148.44	0.81	8.9e-53
Flnb	189.36	108.54	0.8	9.9e-66
Pdlim7	193.04	112.36	0.8	1.1e-104
Rnf112	149.67	86.25	0.8	3.5e-60
Celf2	1461.68	845.68	0.8	3.5e-88
Pcnx2	144.18	83.39	0.8	1.1e-67
B230307C23Rik	48.32	28.17	0.8	8.3e-27
Kcnmb4os2	9.35	5.45	0.8	5.3e-10
Cstad	5.18	2.9	0.8	3.0e-03
Olfr691	4.56	2.7	0.8	6.7e-04
Gck	72.26	42.28	0.8	1.3e-21
Veph1	3.6	1.93	0.79	1.2e-02
A230108P19Rik	3.85	2.24	0.79	9.9e-04
4930428E07Rik	29.43	17.43	0.79	4.9e-12
Tmem91	225.84	131.3	0.79	4.1e-39
Kcna1	48.4	28.45	0.79	6.9e-12
Msln	3.08	1.72	0.79	2.8e-03
Cdr1	4.89	2.94	0.79	1.1e-04
Tmem200a	62.71	36.73	0.79	1.3e-17
Slc8a2	65.54	37.37	0.79	3.9e-19
Vmn2r87	46.21	27.1	0.79	2.8e-25
Pam	765.04	442.15	0.79	4.8e-40
Mmp9	2.33	1.36	0.79	7.0e-03
D330050G23Rik	8.12	4.79	0.79	2.8e-07
Shisa7	76.12	44.3	0.78	7.5e-32
Mc3r	3.72	2.13	0.78	3.6e-03
Tmcc3	588.49	338.87	0.78	6.1e-17
Lrfn2	192.19	114.47	0.78	1.1e-40
4930515L19Rik	1.83	1.04	0.78	1.9e-02
C1ql2	25.01	14.89	0.78	4.9e-09
Togaram2	45.53	26.84	0.78	1.1e-11
Spaca3	1.39	0.79	0.78	3.4e-02
Il34	39.83	23.63	0.78	1.1e-20
1700121C08Rik	4.57	2.76	0.78	1.1e-03
Slitrk5	57.13	33.6	0.78	1.7e-42
Olfr1564	2.71	1.63	0.78	3.3e-03
Gfral	2.31	1.32	0.78	3.1e-02
Nptx1	37.84	22.25	0.78	6.1e-08
Erc2	898.18	525.19	0.77	9.6e-55
Myo5b	17.82	10.39	0.77	1.0e-09
Htr4	83.85	48.87	0.77	4.2e-16
Ablim2	226.4	132.18	0.77	4.9e-33
Grip1os3	7.26	4.27	0.77	2.5e-04
Syt6	48.69	28.43	0.77	2.8e-11
Icam5	34.56	20.33	0.77	2.5e-16
Hnf1b	8	4.81	0.77	2.6e-06
Trmt10a	50.41	29.4	0.77	1.7e-22
Grb14	69.14	42.12	0.77	1.3e-15
Card9	4.51	2.58	0.77	8.7e-04
Lrtm1	26.73	15.59	0.76	1.4e-12
9130204K15Rik	2.33	1.26	0.76	1.5e-02
Slc22a21	20.86	12.36	0.76	3.1e-12
Npas1	20.57	14.12	0.76	6.2e-03
Insl5	5.43	3.29	0.76	1.7e-03
Dhfr	11.17	6.56	0.76	1.6e-07
Slit1	135.08	80.25	0.76	7.8e-21
Eps8l1	7.14	4.33	0.76	1.4e-06
4933412O06Rik	26.01	15.81	0.76	5.2e-13
Grem1	7.89	4.64	0.76	1.8e-06
Bmp8a	1.67	0.92	0.76	4.5e-02
Megf6	25.42	15.27	0.76	4.9e-13
Ccdc157	48.09	28.12	0.76	1.4e-16
4930444P10Rik	31.36	18.8	0.76	3.0e-19
Catsperd	15.37	9.17	0.76	1.3e-12
4930486F22Rik	7.99	5.06	0.76	5.7e-04
Unc79	423.71	252.15	0.76	1.3e-56
Hsd3b3	4.26	2.48	0.75	1.0e-03
Cttnbp2	322.35	192.79	0.75	2.3e-37
Zim1	94.44	56.63	0.75	9.5e-25
Meiob	2.31	1.45	0.75	5.3e-03
Hdac7	141.43	84.75	0.75	6.8e-48
Pfkfb4	96.64	57.18	0.75	5.2e-48
Twist2	4.89	2.92	0.75	1.1e-04
Myo1a	1.64	0.99	0.75	3.2e-02
Plxdc1	53.89	31.84	0.75	7.8e-19
Dlk2	55.72	32.88	0.75	1.2e-28
Thsd7b	272.89	164.49	0.75	1.4e-10
Smpd4	40.58	24.43	0.75	1.1e-23
C86187	1.65	0.9	0.75	3.6e-02
Nbeal2	16.36	9.58	0.75	3.4e-14
Eps8	110.73	65.7	0.75	1.4e-19
Kcnj4	5.44	3.14	0.75	7.6e-05
Gssos1	2.17	1.33	0.74	1.8e-02
Mfap3l	50.78	30.14	0.74	1.0e-23
Grin1os	19.86	11.82	0.74	1.4e-13
Bpifc	1.6	0.92	0.74	2.7e-02
Map3k21	3.78	2.16	0.74	3.1e-03
Gria3	475.59	284.3	0.74	1.5e-83
Morc2b	14.54	8.77	0.74	2.1e-09
Amelx	17.6	10.35	0.74	3.8e-07
Ttc39c	62.84	36.41	0.74	1.4e-16
Kctd1	75.85	45.62	0.74	1.9e-32
Myo5c	3.05	1.93	0.74	2.7e-03
St6galnac5	135.04	82.44	0.74	5.0e-22
Shh	9.75	6	0.74	6.3e-06
Myt1l	735.11	443.54	0.74	3.8e-47
A230087F16Rik	30.6	19.08	0.74	2.8e-10
Tbc1d10c	2.53	1.52	0.74	6.1e-03
4732496C06Rik	8.2	5	0.74	3.0e-06
Actn1	104.11	62.4	0.74	5.3e-42
Reep6	2.86	1.67	0.74	7.4e-03
Spocd1	3.81	2.28	0.74	2.4e-03
A930024N18Rik	2.06	1.34	0.74	1.4e-02
Cdon	37.53	22.66	0.73	9.8e-17
Rims4	59.71	35.51	0.73	2.6e-24
Car11	92.69	56.97	0.73	8.4e-23
B3gnt2	10.27	6.46	0.73	2.9e-03
Fam155a	2738.1	1656.2	0.73	5.8e-72
Hecw1	364.88	223.36	0.73	4.8e-31
Rapgef4os2	3.75	2.41	0.73	2.1e-02
Gdpd5	25.83	15.97	0.73	1.2e-10
Sorbs2	486.14	292.47	0.73	2.8e-37
4930500F10Rik	3.14	1.88	0.73	3.9e-03
Scn3a	248.02	150.06	0.73	9.4e-43
Arhgap22	25.84	15.64	0.73	1.5e-06
Olfr323	15.12	9.21	0.73	1.5e-06
Slc7a6	155.1	93.89	0.72	8.1e-44
D430041D05Rik	279.45	170.93	0.72	2.2e-60
A630023P12Rik	4.73	2.61	0.72	1.8e-03
Mindy4b-ps	5.3	3.41	0.72	1.1e-03
P3h2	52.95	32.37	0.72	3.8e-08
Frmpd4	686	420.51	0.72	1.6e-38
Btbd16	9.14	5.68	0.72	4.6e-07
2010007H06Rik	2.2	1.39	0.72	1.2e-02
Grin1	473.15	289.83	0.72	1.3e-62
Slc5a4b	10.73	6.48	0.72	8.0e-06
Xylb	9.4	5.61	0.72	2.6e-07
Stx1a	69.7	42.88	0.72	9.4e-29
AI467606	11.12	7.09	0.72	1.3e-05
Enox1	457.87	281.63	0.72	7.0e-39
Tfpi	9.34	5.27	0.72	3.8e-04
Gpr26	17.25	10.33	0.71	1.8e-06
Krt77	5.77	3.82	0.71	3.5e-04
Ryr3	298.41	184.64	0.71	1.8e-17
Muc16	3.79	2.42	0.71	8.3e-04
Tshz2	665.12	406.61	0.71	1.7e-38
4933404O12Rik	16.46	10.08	0.71	2.1e-12
9330198N18Rik	20.09	12.37	0.71	1.8e-12
Meg3	15636.33	9400.61	0.71	5.1e-20
Grm1	250.26	155.68	0.71	2.4e-21
Syt13	106.38	65.32	0.71	9.4e-16
Kcnh1	137.61	84.65	0.71	4.7e-53
Kank3	25.77	15.41	0.71	7.5e-15
Slitrk3	25.28	15.37	0.71	1.5e-11
Mtus2	217.98	135.41	0.71	1.8e-22
Zdhhc23	14.61	8.94	0.71	1.8e-07
1700125G02Rik	4.07	2.46	0.71	2.9e-03
Rfx3	327.2	202.11	0.71	9.0e-29
Eqtn	2.56	1.58	0.71	1.0e-02
R3hdm1	576.04	353.42	0.71	1.3e-96
Pla2g6	43.41	25.07	0.71	1.8e-07
Optn	59.95	36.86	0.71	5.4e-39
Slc28a3	3.9	2.75	0.71	4.1e-02
C1qtnf12	27.67	17.32	0.71	7.4e-11
Cenpi	2.35	1.34	0.71	2.1e-02
Lrp3	47.77	28.87	0.7	1.2e-16
4930567K20Rik	31.9	20.57	0.7	8.3e-08
Ptpn12	183.97	113.49	0.7	5.4e-44
Unc5c	866.36	533.97	0.7	2.1e-26
Sptlc3	16.29	10.72	0.7	3.3e-04
2410021H03Rik	9.79	6.05	0.7	6.5e-05
C78859	56	34.88	0.7	2.8e-12
Sntg1	1189.15	743.09	0.7	2.1e-31
Lyrm9	41.7	26.05	0.7	1.8e-21
Hspa1l	2.16	1.31	0.7	5.0e-02
A830031A19Rik	4.14	2.55	0.7	5.0e-03
C030034L19Rik	11.63	7.18	0.7	7.1e-08
Myoz3	2.25	1.24	0.7	4.3e-02
Macrod2	1686.7	1045.58	0.7	1.5e-33
1500035N22Rik	32.17	20.03	0.7	1.7e-19
Adgrl3	1679.28	1041.34	0.7	8.8e-80
Cntn3	419.68	259.7	0.7	8.4e-13
Galnt13	716.4	440.04	0.7	1.0e-26
Plxna4os3	24.09	15.24	0.7	1.4e-11
Wdr66	51.13	31.8	0.7	4.0e-15
Zmynd10	16.32	9.84	0.7	1.6e-06
B830012L14Rik	40.3	25.46	0.69	5.3e-18
Macrod2os1	43.79	26.99	0.69	3.4e-08
Tmem178b	884.85	551.86	0.69	4.0e-60
Dnhd1	7.67	4.8	0.69	5.7e-05
A930019D19Rik	2.33	1.41	0.69	1.9e-02
Upk1a	2.18	1.32	0.69	1.5e-02
Akap12	102.29	63.71	0.69	1.0e-24
Kcns2	5.07	3.19	0.69	1.1e-03
Sdr42e1	16.66	10.54	0.69	2.9e-09
Rgs7	509.97	319.35	0.69	3.6e-45
Prkce	482.82	300.03	0.69	4.6e-62
Ppp3ca	939.87	583.67	0.69	4.0e-85
Mapk15	21.03	15.09	0.69	9.1e-06
Zdhhc1	136.91	84.58	0.69	1.6e-38
Ripor2	152.22	96.27	0.69	2.4e-27
Igsf9b	129.92	80.77	0.69	1.9e-35
Acp1	316.74	195.12	0.68	6.9e-60
Krt25	4.37	2.73	0.68	2.4e-03
Nphp4	53.12	33.24	0.68	9.3e-22
9030612E09Rik	2.79	1.72	0.68	4.8e-02
Slc4a10	284.2	175.62	0.68	3.2e-20
Cstf2	96.3	60.08	0.68	2.5e-40
Nek3	15.12	9.43	0.68	2.0e-09
Csmd3	1805.91	1142.06	0.68	2.2e-29
5330439A09Rik	5.93	3.78	0.68	2.1e-04
Pwp2	15.89	9.76	0.68	2.9e-09
Rab36	112.78	70.11	0.68	7.9e-34
A530046M15Rik	23.88	14.87	0.68	3.4e-08
Abca12	6.96	4.03	0.68	7.1e-04
Bend3	8.92	5.7	0.68	3.4e-06
Xrra1	7.74	4.79	0.68	6.2e-06
Dact1	5.58	3.44	0.67	1.0e-04
2310030G06Rik	5.5	3.49	0.67	4.5e-04
C630028M04Rik	1.91	1.21	0.67	4.3e-02
4932413F04Rik	4.87	2.94	0.67	4.1e-03
Dcdc2c	1.95	1.37	0.67	3.9e-02
A530016L24Rik	3.35	2.01	0.67	2.5e-02
Tex50	52.21	32.66	0.67	3.9e-10
Kcnmb4	37.05	23.26	0.67	9.1e-13
Plec	83.56	52.64	0.67	1.3e-20
Vwa5b2	155.27	98.02	0.67	5.6e-20
C230004F18Rik	538.8	343.73	0.67	7.9e-33
Ralgapa2	223.21	142.14	0.67	4.2e-34
Cacna2d3	582.39	365.98	0.67	7.0e-56
Sidt1	101.29	64.43	0.67	1.1e-41
Samd15	17.47	11.34	0.67	2.0e-11
Tbc1d1	103.65	65.54	0.67	1.4e-48
Dffb	49	31.2	0.67	3.1e-17
Gpr82	2.36	1.58	0.67	3.2e-02
Psg16	11.19	7.21	0.66	1.1e-05
Rell2	72.47	45.86	0.66	6.3e-35
Vstm2a	80.48	50.81	0.66	3.9e-14
Stxbp6	94.79	60.72	0.66	2.1e-11
Cacng8	92.07	58.43	0.66	1.2e-29
Ckmt2	10.54	6.67	0.66	8.3e-07
Siae	29.4	18.76	0.66	5.4e-18
Shcbp1l	11.47	7.31	0.66	1.0e-08
Sult2b1	6.41	3.98	0.66	9.8e-04
Ahr	14.2	9.07	0.66	6.5e-08
Clnk	16.78	10.67	0.66	1.1e-09
Sema3a	28.8	17.61	0.66	3.0e-05
Celf5	169.39	107.48	0.66	1.8e-72
B230317F23Rik	9.54	6.19	0.66	4.9e-07
Pcdha1	1.78	1.2	0.66	3.9e-02
Ctnna2	2185.06	1388.04	0.66	5.3e-27
Otof	26.77	17.23	0.66	1.2e-06
Plcxd3	322.85	204.52	0.66	1.1e-24
4933424L21Rik	4.17	2.68	0.66	3.4e-03
Cbln1	29.46	18.98	0.66	4.3e-05
Htr1a	2.48	1.72	0.66	3.9e-02
Kifc2	173.64	110.8	0.66	1.1e-55
Kcnip1	392.04	250.38	0.66	4.4e-48
Zfyve28	75.11	47.95	0.66	8.8e-31
Nsun7	109.12	69.83	0.66	6.1e-40
Cyp4x1os	3.73	2.51	0.66	1.2e-02
Cyp11a1	1.75	1.13	0.66	3.7e-02
Adcy6	36.88	23.27	0.66	1.4e-16
Scn1a	288.89	185.08	0.65	1.1e-20
Lsmem1	4.28	2.6	0.65	3.0e-03
Ctif	209.46	134.77	0.65	6.0e-46
Tdrp	12.77	8.02	0.65	4.3e-08
Lynx1	115.32	73.5	0.65	2.5e-30
Ccdc116	3.63	2.33	0.65	8.1e-03
Zfp697	72.24	46.38	0.65	7.1e-26
Oaz3	8.73	5.58	0.65	1.6e-05
Slc1a6	61.24	39.55	0.65	4.5e-14
Prkg1	1327.57	861.9	0.65	2.9e-34
Eps8l3	2.94	1.84	0.65	1.8e-02
Igsf21	48.62	31.01	0.65	5.1e-10
Mtfr2	5.57	3.46	0.65	1.1e-03
Cntnap5c	202.44	129.8	0.65	7.8e-06
Kcna2	48.13	30.68	0.65	4.2e-16
Hfm1	30.31	20.06	0.65	4.4e-11
Coro1a	30.43	20.64	0.65	4.0e-06
Dync1i1	467.79	299.76	0.65	1.8e-41
Pdk3	34.11	21.84	0.65	4.5e-17
Csmd1	2472.57	1589.77	0.65	1.2e-28
Atg9b	24.6	15.96	0.65	1.1e-11
Zar1	8.8	6.22	0.65	2.7e-03
Cdc42ep3	36.13	23.02	0.64	8.2e-15
Atoh7	6.77	4.43	0.64	3.4e-05
Ankfn1	195.86	125.29	0.64	1.7e-15
Tango2	223.85	144.87	0.64	1.0e-53
Cfap61	60.92	40.17	0.64	2.8e-04
Vac14	34.39	22.03	0.64	1.3e-18
Proser2	5.9	3.91	0.64	1.1e-03
Ubxn11	121.41	78.34	0.64	4.4e-30
Prkar2b	76.49	49.17	0.64	1.6e-29
Klhl3	118	75.84	0.64	2.7e-32
Btbd19	6.05	3.75	0.64	5.1e-03
Morn1	142.63	91.41	0.64	3.3e-54
Kcnd3os	4.85	3.02	0.64	3.4e-03
Alg8	41.78	26.92	0.64	2.6e-23
Prm1	2.68	1.7	0.64	2.6e-02
Ptchd4	211.93	137.34	0.63	3.1e-25
Raver2	34.47	22.82	0.63	5.4e-06
Ero1lb	55.15	35.21	0.63	5.1e-33
Mmp24	75.14	48.96	0.63	5.0e-27
Rhbdl3	73.65	47.44	0.63	2.2e-14
Ttc37	112.09	72.51	0.63	2.7e-38
Chia1	4.62	3.07	0.63	1.0e-03
Slc9a5	32.04	21.03	0.63	5.0e-17
Crybb3	3.78	2.49	0.63	2.6e-03
AB041806	9.74	6.18	0.63	8.5e-04
Armc9	275.24	178.88	0.63	1.0e-40
Pcsk2	520.88	331.56	0.63	3.6e-18
4930532I03Rik	37.43	24.74	0.63	2.5e-16
A230006K03Rik	545.3	359.49	0.63	2.2e-17
Spata48	6.86	4.64	0.63	5.5e-04
Col6a3	4.04	2.58	0.63	1.3e-02
Olfr239	6.77	4.32	0.63	9.2e-04
Lancl3	23.51	15.03	0.63	6.6e-07
Usp29	1261.34	826.4	0.63	4.6e-27
Tnip2	54.23	34.49	0.63	4.3e-23
Tmem63c	84.31	54.98	0.63	2.2e-23
Nell1	329.14	217.4	0.63	8.0e-09
Samd11	14.16	9.76	0.63	2.1e-05
Mirg	295.46	192.53	0.63	4.1e-18
Hcn4	9.08	5.61	0.63	4.3e-04
Poln	15.5	10.01	0.63	3.0e-05
Ndfip1	420.93	273.17	0.63	1.2e-39
Rimbp2	267.71	175.75	0.62	5.0e-43
Fam196b	53.68	35.41	0.62	2.2e-13
Camk2b	237.94	154.95	0.62	5.8e-62
Nkx2-1	39.8	27.34	0.62	1.1e-06
Agfg2	74.41	47.83	0.62	8.1e-13
Rcor1	88.75	57.35	0.62	8.8e-38
Miat	234.26	151.97	0.62	2.6e-25
Spata2l	11.24	7.68	0.62	2.2e-06
D5Ertd615e	11.1	7.55	0.62	6.2e-04
Nol4l	147.91	96.73	0.62	1.1e-44
Mmp17	27.29	17.95	0.62	4.9e-13
Carmil3	92.42	60.42	0.62	1.9e-34
Rab27a	91.44	58.68	0.62	5.0e-27
Rragd	50.27	32.51	0.62	1.5e-17
Gpr155	45.24	29.31	0.62	2.9e-13
Ethe1	26.87	18.36	0.62	3.6e-09
Lonrf3	22.7	14.87	0.62	2.2e-06
4933406B15Rik	5.46	3.6	0.62	3.8e-04
Alpk2	3.89	2.43	0.62	2.2e-02
Hecw2	342.73	227.9	0.62	2.2e-19
Pofut1	85.95	55.53	0.62	7.3e-32
B3gat1	52.27	34.09	0.62	8.5e-16
Dtwd2	15.83	10.4	0.62	1.2e-09
Radil	83.25	54.39	0.62	7.7e-29
Il12rb2	8.19	5.4	0.62	2.4e-05
Ccdc36	5.79	3.93	0.62	1.1e-03
Rasgef1a	153.58	100.43	0.62	1.8e-54
Slc22a3	8.18	5.51	0.62	3.3e-04
B3glct	48.43	31.89	0.62	1.9e-15
Unc5a	39.07	24.91	0.62	2.2e-08
Lnx1	91.65	59.92	0.62	1.2e-18
Spata9	4.99	3.24	0.62	4.3e-03
Magi1	787.86	519.97	0.62	4.8e-51
Slc25a37	12.72	8.27	0.62	4.2e-07
Htr2a	21.09	13.66	0.62	8.0e-07
Adra2c	9.58	6.35	0.62	1.9e-04
Gstz1	191.39	124.48	0.61	3.0e-41
Plxna4	356.22	235.14	0.61	7.1e-44
Scrt1	36.6	23.56	0.61	4.9e-15
Syt16	283.46	186.64	0.61	1.7e-33
Gabra1	150.92	99.01	0.61	4.4e-17
Adgrb2	81.71	53.18	0.61	7.6e-20
Ppfia2	589.05	393.96	0.61	1.5e-23
Slc35f3	74.06	49.29	0.61	1.7e-23
Ccdc177	13.01	8.41	0.61	4.3e-05
Mroh8	17.2	11.81	0.61	5.6e-06
Ppargc1b	73.77	49.11	0.61	8.9e-21
Fgf12	889.89	572.39	0.61	8.8e-33
Ankrd45	68.61	44.39	0.61	1.1e-10
C530008M17Rik	394.02	261.34	0.61	4.7e-58
Dock3	601.09	401.18	0.61	1.8e-31
Reep2	117.3	78.03	0.61	6.5e-29
Knl1	7.89	5.18	0.61	8.9e-03
P2rx5	3.21	2.02	0.61	3.1e-02
Efcab1	139.82	91.91	0.61	7.6e-33
Tmem35a	62.19	44.08	0.61	1.1e-05
Ntrk3	523.9	344.43	0.61	6.8e-68
Zcwpw1	7.21	4.73	0.61	7.5e-05
Plxna1	38.76	25.65	0.61	5.1e-16
Tiam1	127.85	83.31	0.6	4.3e-19
Bcl11a	85.24	56.37	0.6	2.8e-09
Pate2	48.89	32.2	0.6	3.4e-17
Ankrd13b	45.26	29.28	0.6	3.4e-20
Cyb5r2	3.06	2.01	0.6	1.3e-02
Mpp4	5.51	3.78	0.6	2.5e-03
Usp46os1	18.58	12.1	0.6	4.4e-08
Cntnap5b	373.83	243.34	0.6	9.8e-08
Filip1	42.32	27.77	0.6	2.0e-10
Tle2	59.3	37.97	0.6	3.0e-12
Gabrg2	224.46	150.74	0.6	5.8e-13
Aff3	266.06	176.22	0.6	8.5e-22
Iqce	105.91	70.28	0.6	3.3e-41
Map2	1196.4	789.32	0.6	1.5e-40
Cask	286.81	188.92	0.6	2.2e-34
Ncmap	14.14	9.75	0.6	2.8e-05
Morc1	5.1	3.3	0.6	3.9e-03
Cpne6	50.7	33.2	0.6	4.6e-15
Dusp23	15.66	10.56	0.6	2.0e-09
Slc29a4	15.6	10.13	0.6	2.5e-05
Abcc1	53.62	35.71	0.6	1.2e-18
Msantd3	19.2	12.82	0.6	1.8e-06
Elfn1	20.24	13.38	0.59	4.8e-07
Myadml2os	5.76	3.93	0.59	2.8e-03
Gabra2	429.79	284.53	0.59	1.4e-34
Sptbn4	216.48	145.63	0.59	6.4e-29
Itga8	11.45	8.07	0.59	4.2e-03
Diras2	28.64	18.72	0.59	1.3e-12
Slc2a6	23.97	16.83	0.59	1.4e-09
Tas1r1	6.96	4.68	0.59	2.3e-03
Marveld3	6.12	4.07	0.59	1.0e-03
Fnbp1l	192.82	128.68	0.59	2.6e-25
Pm20d2	6.97	4.57	0.59	1.2e-04
Hap1	480.32	325.88	0.59	1.1e-24
Lsamp	7939.69	5364.67	0.59	5.2e-32
Cd164l2	3.93	2.64	0.59	1.5e-02
E130006D01Rik	4.36	3	0.59	4.6e-03
Sox5	416.36	273.87	0.59	4.0e-20
Cd46	91.19	61.01	0.59	1.5e-17
Zbtb34	28.31	18.39	0.59	4.7e-11
4931440J10Rik	43.84	28.89	0.59	4.9e-20
Calb1	183.82	131.84	0.59	1.5e-07
Spock1	460.22	304.95	0.59	9.8e-26
5330434G04Rik	730.24	491.87	0.59	1.2e-24
Gpr171	4.49	3.09	0.59	2.7e-03
Nipal2	117.2	79.31	0.59	1.9e-14
Selenbp2	2.54	1.72	0.59	3.9e-02
Ssh3	34.35	22.67	0.59	9.1e-13
Ctdspl	147.52	98.68	0.59	8.7e-44
Adgra1	112.26	75.74	0.59	5.7e-14
Doc2a	24.36	17.47	0.58	8.0e-07
Syt9	77.39	51.89	0.58	6.7e-28
Add3	153.07	102.15	0.58	1.7e-25
Reps2	200.99	134.59	0.58	3.9e-30
Cenpv	148.97	100.7	0.58	8.1e-25
Rap2b	39.88	26.76	0.58	2.0e-08
A830052D11Rik	4.68	2.99	0.58	3.5e-03
Grb10	348.06	234.23	0.58	3.9e-28
Hrk	18.49	12.43	0.58	2.4e-05
Kcnip4	4092.2	2745.55	0.58	2.0e-25
Ccdc30	209.27	139.52	0.58	1.4e-33
Evc2	10.55	7.16	0.58	8.3e-05
Dchs2	61.93	41.43	0.58	1.6e-13
Gabrb2	222.3	150.19	0.58	9.2e-11
Rgl1	164.35	110.1	0.58	3.6e-27
Zmym1	93.99	60.5	0.58	5.3e-16
Scn8a	243.75	164.22	0.58	8.6e-27
Cdc7	72.94	49.63	0.58	3.5e-18
Klhl5	70.58	47.13	0.58	5.3e-15
Sgip1	681.36	461.74	0.58	6.1e-25
Epb41l4b	159.19	107.9	0.58	7.7e-23
Tk1	5.92	4.03	0.58	5.6e-03
Lrrtm1	49.73	33.98	0.58	2.2e-10
Tbc1d2	7.03	4.55	0.58	9.4e-03
Vps13a	259.9	175.44	0.58	2.2e-34
D930007P13Rik	6.53	3.95	0.58	2.1e-02
Oscar	4.88	3.22	0.57	1.0e-02
Rnf165	66.57	45.43	0.57	5.4e-19
Lbhd2	20.17	15.58	0.57	3.3e-03
Fgfr1	100.92	68.53	0.57	1.9e-21
Ccbe1	35.1	23.87	0.57	9.2e-06
Cxxc4	103.64	69.9	0.57	9.2e-26
B3galt5	51.16	34.18	0.57	3.6e-18
Hspa12a	39.32	25.74	0.57	4.1e-07
Vldlr	46	31.09	0.57	3.0e-11
Spink10	78.3	51.39	0.57	8.8e-09
Adam8	5.42	3.77	0.57	5.3e-04
Nox1	29.3	19.78	0.57	1.6e-05
Nin	116.34	78.46	0.57	6.3e-20
Larp1b	93.95	63.74	0.57	2.1e-32
Itgae	14.19	8.99	0.57	2.3e-02
Rrh	2.49	1.68	0.57	3.0e-02
Slc25a23	214.81	145.69	0.57	2.5e-35
Dctd	9.21	6.21	0.57	1.8e-05
Efnb1	12.8	9.01	0.57	1.3e-04
Kidins220	466.84	309.01	0.57	3.3e-30
Tmc4	42.51	28.58	0.57	2.5e-17
Adarb1	100.75	69.35	0.57	7.1e-15
Fam71d	12.57	8.6	0.57	9.0e-05
Lmtk3	145.11	98.01	0.57	1.7e-43
Ptch2	16.57	11.38	0.57	6.6e-05
Hrh3	27.44	18.67	0.56	4.4e-07
Nrg4	21.3	14.9	0.56	1.0e-09
Tmem132b	192.22	130	0.56	2.5e-26
Lrfn1	43.74	29.46	0.56	1.9e-16
Rtn4r	7.39	4.95	0.56	1.4e-03
Zwilch	12.56	8.38	0.56	1.1e-05
Mmaa	69.75	47.99	0.56	1.6e-19
Zfhx2os	2.14	1.45	0.56	4.5e-02
Rmi2	4.88	3.48	0.56	4.7e-03
Gucy1a2	361.52	250.42	0.56	6.8e-19
Ppp1r16b	107.57	72.72	0.56	7.4e-07
Syt2	28.64	19.67	0.56	2.2e-08
Fanca	4.53	3.07	0.56	3.8e-02
Fam57a	51.07	34.61	0.56	1.2e-21
Cyp2j11	3.21	2.27	0.56	2.7e-02
Tonsl	7.8	5.17	0.56	4.3e-04
Nucb2	44.18	31.09	0.56	4.1e-08
Pim2	78.73	52.21	0.56	5.9e-22
4921511C10Rik	81.77	54.05	0.56	7.5e-18
D10Wsu102e	69.92	46.64	0.56	5.1e-10
Crtc1	81.02	55.2	0.56	9.3e-22
Lmln	49.96	33.81	0.56	2.3e-09
Entpd3	29.46	19.91	0.56	1.3e-11
Brinp1	402.66	277.35	0.56	1.8e-18
Ube3a	1630.84	1120.1	0.55	5.3e-25
Snrpn	213.38	148.35	0.55	3.6e-06
Shisa2	2.98	2.2	0.55	4.0e-02
Ank2	2002.69	1374.57	0.55	8.6e-63
Ccdc65	22.43	15.97	0.55	2.5e-08
1700094M23Rik	2.88	2.06	0.55	3.3e-02
Sntb2	78.76	54.11	0.55	1.1e-16
Nrgn	72.37	50.56	0.55	4.7e-07
Jph1	22.16	15.51	0.55	1.6e-03
Ptp4a2	125.55	83.97	0.55	3.2e-10
Fign	83.07	58.42	0.55	1.3e-06
Tbc1d30	36.18	24.84	0.55	2.2e-11
Rmdn2	24.23	17.07	0.55	2.1e-10
Uhrf1bp1l	115.27	78.96	0.55	5.2e-38
Sez6l	221.54	151.79	0.55	1.7e-23
Pip5kl1	11.58	7.84	0.55	2.3e-04
Nol9	29.01	20.1	0.55	1.1e-09
Bend4	22.55	15.39	0.55	2.3e-08
Dennd6b	121.32	83.33	0.55	1.6e-20
Usp35	28.08	19.14	0.55	2.5e-13
Msh4	2.59	1.66	0.55	4.7e-02
Grip1os1	8.87	6.03	0.55	3.5e-03
Tnfaip8l1	3.3	2.17	0.55	1.9e-02
Tada2a	99.35	68.67	0.54	4.4e-31
9530036O11Rik	58.5	39.23	0.54	1.5e-04
Abca14	3.6	2.68	0.54	4.1e-02
Ipo11	110.32	76.33	0.54	1.4e-33
Rps6ka4	13.98	9.69	0.54	2.1e-04
Pbx4	89.47	61.7	0.54	2.6e-24
Vmn2r56	3.31	2.35	0.54	1.6e-02
Ltk	18.04	12.78	0.54	3.0e-07
Galnt16	198.65	135.58	0.54	1.2e-23
Arhgap20os	12.41	8.6	0.54	1.9e-05
Adcy5	88.06	60.87	0.54	4.3e-22
Xkr8	9.7	6.75	0.54	5.5e-05
Ankrd42	69.76	48.03	0.54	5.8e-19
Nrg2	200.84	139.69	0.54	3.9e-26
Sh3gl2	205.67	140.05	0.54	7.3e-18
Tub	86.99	59.81	0.54	1.0e-22
Whrn	54.5	37.24	0.54	1.8e-11
P2ry14	299.73	206.61	0.54	2.2e-48
Suclg2	31.54	21.61	0.54	5.5e-07
Abhd6	100.8	68.79	0.54	6.6e-30
Stk19	86.16	59.76	0.54	2.6e-22
Bean1	41.92	29.48	0.54	8.8e-10
Prrt4	15.08	10.3	0.54	6.2e-05
Kifc1	14.16	9.64	0.54	1.3e-05
Abca17	6.72	4.76	0.54	4.7e-03
Eif2b3	80.12	54.95	0.54	1.6e-29
Ets2	35.05	24.86	0.54	3.7e-04
Ksr2	256.75	185.18	0.54	7.8e-10
Gpr12	9.89	7.1	0.54	4.1e-04
Pemt	9.03	6.44	0.54	1.1e-03
Ppp1r13b	156.78	108.88	0.54	5.8e-32
1700010I14Rik	12.71	8.67	0.54	2.1e-06
Trmt10b	45.04	30.8	0.54	5.9e-11
Stxbp5l	415.79	290.6	0.54	1.1e-34
Slc37a1	30.16	21.2	0.54	1.8e-13
B830042I05Rik	3.58	2.4	0.53	3.6e-02
Tln2	153.93	105.45	0.53	4.9e-11
Robo2	351.52	240.69	0.53	2.8e-16
Prkag2os1	3.19	2.24	0.53	2.8e-02
Mical3	341.89	238.22	0.53	2.1e-22
Lrp8os2	49.84	34.95	0.53	1.0e-13
Tns3	60.87	43.91	0.53	2.0e-03
Cenpu	5.36	3.71	0.53	5.4e-03
Fam135b	264.81	185.92	0.53	9.3e-22
Pde5a	5.68	3.97	0.53	2.7e-03
Gkap1	242.02	166.34	0.53	5.7e-24
1700080N15Rik	62	44.58	0.53	2.7e-16
Jph4	107.56	74.21	0.53	9.2e-29
Nav2	823.65	575.36	0.53	8.2e-22
Pde6h	5.34	3.61	0.53	9.3e-03
Csrnp2	18.92	13.12	0.53	3.3e-07
Gria1	940.64	651.86	0.53	1.8e-61
Gpr87	7.51	5.17	0.53	4.9e-03
Tnxb	12.08	8.53	0.53	6.7e-05
4931428F04Rik	26.44	18.39	0.53	1.9e-10
Smug1	17.49	12.07	0.53	4.0e-06
Rbm24	56.15	38.65	0.53	3.6e-12
Csrnp3	401.39	279.97	0.53	2.2e-30
Ephb1	174.91	122.22	0.53	8.5e-11
Cfap206	27.55	19	0.53	3.7e-03
9630001P10Rik	3.34	2.22	0.53	2.8e-02
Rpl12	20.47	13.88	0.53	4.7e-09
Pappa	14.08	9.78	0.53	1.0e-05
Adgrg4	11.91	7.65	0.53	1.1e-02
Pdzd4	291.78	204.48	0.53	1.8e-31
Stac3	13.34	9.33	0.53	7.1e-05
Fbxo41	73.67	51.16	0.53	3.3e-19
Iglon5	41.07	29.01	0.53	6.6e-15
Impdh1	51.38	35.43	0.53	3.2e-15
Zim3	27.03	18.73	0.52	1.8e-07
Cyp46a1	83.89	59.92	0.52	1.3e-25
Ttc7	25.56	17.57	0.52	1.0e-05
Flrt2	121.55	84.17	0.52	3.9e-07
Mast1	102.29	71.57	0.52	3.6e-19
Pxylp1	31.65	22.14	0.52	5.3e-11
Rab40b	59.04	40.8	0.52	2.9e-18
Jam3	161.98	111.93	0.52	9.3e-13
Grin2b	936	654.09	0.52	1.4e-29
Uchl1os	17.17	12.2	0.52	7.9e-04
Rassf8	185.25	127.55	0.52	5.0e-25
Zbbx	31.17	21.73	0.52	8.2e-05
Rab3d	5.85	3.67	0.52	2.2e-02
Epha10	85.43	61.92	0.52	4.2e-07
Nrg1	1555.39	1133.8	0.52	2.2e-06
Gtpbp3	31.27	21.65	0.52	3.9e-10
Aagab	57.87	40.53	0.52	1.7e-16
2700038G22Rik	14.06	9.87	0.52	1.2e-05
Kcnj3	290.3	202.34	0.52	9.9e-27
Nup93	78.76	55.89	0.52	3.4e-18
Oca2	6.08	4.37	0.52	2.9e-03
Ulk4	116.41	82.03	0.52	1.4e-18
D7Ertd443e	13.54	9.82	0.52	4.5e-02
Epb41l3	297.7	210.21	0.52	3.9e-20
Syt5	123.92	92.91	0.52	1.0e-06
Pi16	18.37	12.77	0.52	1.4e-05
Iqsec2	117.48	81.47	0.52	2.1e-29
Rap1gap2	145.41	101.85	0.52	1.4e-32
Agap1	340.82	240.04	0.52	3.4e-29
Lrrn1	46.47	33.03	0.52	6.3e-08
Plppr2	125.08	87.02	0.52	2.1e-19
Akap13	111.89	80.24	0.52	9.6e-06
Mfsd4b1	6.44	4.43	0.52	1.9e-03
Med12l	262.04	184.66	0.52	3.2e-24
Tctn3	25.01	17.6	0.52	5.5e-11
Nell1os	40.99	29.22	0.52	9.8e-06
Exd2	90.11	63.61	0.52	2.2e-18
Zfp108	3.76	2.61	0.52	3.2e-02
Exoc6	55.82	38.73	0.52	5.7e-11
4930587E11Rik	47.38	32.73	0.52	1.3e-04
Drc1	80.49	56.68	0.52	2.3e-11
Cgn	36.34	25.6	0.52	2.8e-10
Fbxo10	167.27	116.71	0.51	4.0e-28
Lpcat4	29.07	21.1	0.51	5.8e-06
Fndc3a	274.68	193.28	0.51	9.9e-24
Plxna3	27.18	18.89	0.51	1.1e-08
Coq8b	81.57	56.76	0.51	9.0e-17
Cbx8	12.62	9.09	0.51	2.0e-04
Fndc9	101.58	71.69	0.51	9.3e-20
Gls	305.93	215.56	0.51	1.0e-26
Osbpl6	409.22	289.78	0.51	2.1e-28
Ccdc148	171.34	119.99	0.51	2.9e-23
Nox4	15.54	11.08	0.51	1.1e-02
Nkx2-2	16.52	11.63	0.51	5.7e-05
Nfkbid	5.84	3.93	0.51	1.1e-02
Tspoap1	141.4	99.31	0.51	6.8e-18
Fzd3	97	67.74	0.51	5.5e-11
Susd1	46.91	33.6	0.51	1.6e-10
Fndc8	11.74	8.06	0.51	3.1e-04
Abcg4	48.87	33.6	0.51	7.4e-11
Dnajc6	445.28	314.42	0.51	4.6e-27
Zdhhc24	24.94	17.33	0.51	4.1e-10
Cdc42bpa	399.3	284.78	0.51	4.2e-13
Ppfia4	55.78	39.34	0.51	2.3e-12
Syn3	322.96	228.88	0.51	3.9e-19
Dis3l	35.05	25.07	0.51	2.1e-09
BC039966	4.45	3.43	0.51	4.9e-02
Gpr139	9.52	6.83	0.51	2.5e-03
Mboat2	151.07	104.96	0.51	1.2e-19
Fam98a	62.78	44.2	0.51	1.8e-18
Syt1	1660.15	1164.12	0.51	2.1e-22
Fbxl5	139.92	98.79	0.51	3.7e-19
Tek	19.67	13.67	0.51	2.9e-05
Fyco1	73.14	50.52	0.51	6.6e-06
Fam117a	15.51	10.62	0.51	5.7e-05
Nefm	47.51	33.85	0.51	1.8e-08
Mettl27	11.85	8.66	0.51	1.7e-03
Cldn18	14.15	9.46	0.51	1.0e-03
Lmo4	64.24	46.33	0.51	2.0e-11
Lrp8	119.9	85.27	0.51	3.2e-20
Mlec	91.61	60.54	0.51	1.4e-05
Trim17	18.6	13.31	0.51	4.5e-06
Olfr690	4.93	3.4	0.51	1.3e-02
Grm8	458.81	326.18	0.51	4.7e-08
Slx1b	34.09	24	0.51	2.2e-11
Dab1	1270.14	895.17	0.51	1.0e-46
Ttll11	134.72	95.86	0.51	7.6e-25
Ube2cbp	19.03	13.66	0.51	8.0e-07
Rapgef4	294.44	209.51	0.51	3.4e-31
Rock2	230.43	162.5	0.5	1.9e-36
Hook2	85.86	61.6	0.5	2.2e-17
Klhdc10	409.15	290.58	0.5	6.0e-29
Rnps1	129.62	91.64	0.5	1.8e-38
Begain	62.47	43.96	0.5	1.2e-15
Mblac2	155.95	111.18	0.5	8.7e-23
Clvs1	193.57	138.91	0.5	7.5e-11
Zfp692	156.26	108.51	0.5	5.2e-20
5330413P13Rik	10.16	7.35	0.5	3.0e-04
Rap2a	81.99	57.95	0.5	1.1e-11
A430027H14Rik	9.14	6.75	0.5	1.7e-04
Plppr3	108.07	77.25	0.5	1.3e-19
Spata16	8.84	6.45	0.5	1.8e-03
Nemp1	27.94	19.99	0.5	8.3e-11
Cacna1d	542.96	387.99	0.5	6.4e-28
Ppp4r4	63.62	45.09	0.5	1.1e-12
Prickle2	521.6	372.21	0.5	9.0e-20
Lmnb2	17.52	12.7	0.5	1.5e-06
Tfr2	12.4	8.82	0.5	1.9e-05
Ssx2ip	46.61	32.86	0.5	9.6e-06
Ankrd50	26.16	18.03	0.5	1.2e-04
Ccdc57	110.23	77.31	0.5	5.1e-20
Fshr	13.83	8.36	0.5	2.7e-02
Atp2b3	107.85	77.61	0.5	1.1e-20
Fank1	23.94	16.99	0.5	2.6e-04
Actl6b	75.89	55.28	0.5	3.1e-16
9430038I01Rik	14.22	9.87	0.5	4.4e-04
Gabbr2	269.4	193.97	0.5	2.1e-15
March11	50.9	36.41	0.5	4.0e-15
Celf3	215.24	153.23	0.49	2.2e-21
Dlc1	192.06	137.65	0.49	2.4e-11
Grid2	2814.05	2009.2	0.49	3.2e-20
Arhgap17	70.78	51.19	0.49	2.1e-05
Sorcs1	507.46	357.21	0.49	3.5e-07
Shkbp1	18.92	13.44	0.49	4.8e-06
B230209E15Rik	210.04	149.74	0.49	2.5e-36
Cntln	128.68	92.01	0.49	2.1e-16
Pgbd5	47.5	33.54	0.49	1.5e-10
Ccdc15	24.46	17.37	0.49	5.7e-05
Camsap3	21.07	14.84	0.49	3.1e-08
Glt1d1	78.02	55.51	0.49	8.0e-16
Clec18a	7.05	4.61	0.49	2.5e-02
Rfx1	33.29	23.49	0.49	9.7e-12
Kcnq2	120.32	85.79	0.49	1.0e-23
Spock3	590.83	421.85	0.49	4.2e-18
A930007I19Rik	28.03	20.25	0.49	2.8e-07
Plppr5	76.49	54.91	0.49	1.1e-22
Mecr	117.7	85.78	0.49	8.0e-12
Cd163l1	7.22	5.3	0.49	3.9e-03
Rprml	14.67	10.66	0.49	2.0e-03
Kcnb1	99.78	71.27	0.49	7.2e-21
Dhx32	84.72	60.6	0.49	3.4e-20
Rcan3	70.32	50.22	0.49	3.6e-13
Acsl1	85.15	60.91	0.49	5.1e-22
Rrp15	27.16	19.63	0.49	1.7e-08
E330018M18Rik	18.24	13.48	0.49	1.1e-05
Tmem25	45.29	32.85	0.49	2.5e-14
Tanc2	779.45	563.23	0.48	4.7e-35
Slc45a4	34.2	24.46	0.48	1.9e-10
Wwp1	130.5	92.84	0.48	7.8e-12
Gpat3	17.55	12.21	0.48	2.3e-05
Crip3	3.36	2.35	0.48	4.5e-02
Palm	119.2	84.56	0.48	5.7e-19
Slc6a15	79.02	57.28	0.48	5.1e-10
Rps2	13.16	9.3	0.48	6.2e-05
Abcc8	24.01	17.45	0.48	3.5e-07
Serpini1	114.76	85.26	0.48	3.5e-09
Mapk3	41.61	31.02	0.48	4.5e-06
Rap1gds1	185.84	133.89	0.48	1.6e-18
Afdn	233.12	168.27	0.48	2.6e-30
Smc2	25.36	18.05	0.48	2.0e-06
Smad3	25.78	18.34	0.48	3.1e-03
1700024B05Rik	38.8	28.35	0.48	3.1e-09
Zbtb17	39.74	27.79	0.48	5.0e-10
Rasgef1b	195.77	144.01	0.48	6.2e-10
Plcl2	138.27	100.75	0.48	6.5e-11
Platr2	5.22	3.75	0.48	1.8e-02
Wdr31	26.36	19.32	0.48	1.0e-06
Rhbdf1	7.53	5.31	0.48	5.1e-03
Lrrc3b	86.14	63.05	0.48	1.4e-13
Kcnk2	238.75	171.38	0.48	2.4e-07
Mb21d2	64.2	46.96	0.48	9.5e-11
Zfp599	4.71	3.29	0.48	2.1e-02
Gfra2	55.18	39.78	0.48	8.5e-07
Sipa1l3	139.32	99.93	0.48	2.2e-15
Atp23	17.86	12.45	0.48	3.1e-06
Dip2c	668.73	483.78	0.48	4.6e-55
Csmd2os	9.67	6.96	0.48	1.9e-03
Hexdc	57.53	41.09	0.48	5.3e-09
Dlgap3	66.06	47.56	0.48	2.5e-09
Nr6a1	250.92	179.93	0.48	2.6e-33
Pls3	75.82	54.66	0.48	2.2e-16
Bbs9	205.21	147.41	0.48	4.8e-23
Samd10	26.32	19.44	0.48	2.2e-09
Dmd	1217.02	879.34	0.47	4.2e-18
Actr3b	53.65	39	0.47	5.7e-11
Slf2	168.67	121.46	0.47	8.2e-15
Mark1	87.28	63.1	0.47	1.2e-10
Srrm3	202.15	147.73	0.47	8.1e-19
Svop	197.58	142.62	0.47	7.0e-36
Slc35b3	49.25	35.23	0.47	4.6e-11
Reck	56.86	40.34	0.47	2.4e-15
Fhit	283.47	202.23	0.47	4.3e-11
Xylt1	174.26	126.16	0.47	5.7e-20
1700027H10Rik	12.24	8.8	0.47	4.2e-04
Zfp955a	18.4	13.33	0.47	2.0e-06
Dner	326.44	235.05	0.47	1.2e-18
Gdpd2	33.36	23.5	0.47	2.1e-05
Jade3	39.89	28.81	0.47	1.1e-11
Sec61a2	202.11	146.04	0.47	1.4e-26
Arhgap27os2	7.5	5.24	0.47	2.9e-02
Mpzl3	6.82	4.87	0.47	2.2e-02
Lonrf1	27.2	19.76	0.47	1.7e-08
2900026A02Rik	40.9	29.88	0.47	6.2e-07
Nova2	123.72	87.95	0.47	4.6e-15
1700012I11Rik	4.14	3.19	0.47	2.4e-02
A230050P20Rik	131.94	95.29	0.47	8.2e-21
Slc35f4	156.92	112.68	0.47	9.6e-08
Arhgap20	96.88	70.76	0.47	2.8e-15
Gpr165	21.58	14.79	0.47	3.0e-05
Jakmip2	236.04	172.62	0.47	1.5e-20
Sun1	111.46	81.02	0.47	1.5e-17
D130043K22Rik	139.75	101.39	0.47	7.7e-16
Rimkla	24.09	17.4	0.47	2.1e-08
C2	3.57	2.76	0.47	2.7e-02
Chka	246.44	178.8	0.47	1.2e-32
Csmd2	361.12	260.91	0.47	3.4e-29
Sox12	12.79	9.18	0.47	5.5e-04
Smap1	116.88	85.11	0.47	2.3e-24
Il17b	4.47	3.12	0.47	3.2e-02
Obsl1	17.58	12.28	0.47	8.5e-05
Hpcal4	37.68	28.72	0.47	9.6e-04
Gria2	1156.96	839.38	0.47	2.5e-21
Mov10l1	14.4	10.47	0.47	1.1e-04
Nusap1	21.99	15.83	0.47	2.3e-07
Slc6a6	174.76	126.29	0.47	2.6e-14
Pced1b	242.76	176.56	0.46	2.3e-19
Sema4f	33.73	25.04	0.46	2.9e-07
2900092C05Rik	6.38	4.7	0.46	6.7e-03
E230001N04Rik	18.21	14.17	0.46	4.6e-03
Slco3a1	162.98	119.11	0.46	2.9e-13
Abcg1	63.73	46.35	0.46	1.5e-06
Cnnm1	62.13	44.81	0.46	4.3e-15
Cdh22	111.18	80.68	0.46	2.9e-12
Gprin1	12.72	8.92	0.46	7.6e-05
Slc7a14	152.76	110.79	0.46	2.0e-09
Fancd2	10.38	7.53	0.46	8.6e-03
Kcnu1	8.66	6.25	0.46	1.8e-03
Stk40	45.99	32.93	0.46	2.4e-07
Pde1a	315.31	230.18	0.46	1.5e-19
Arl13a	5.92	4.41	0.46	1.4e-02
Vstm5	42.32	31.37	0.46	2.0e-08
Mettl4	16.46	12.01	0.46	7.7e-06
Slc12a9	47.16	34.22	0.46	5.8e-06
Fbxw7	122.87	89.07	0.46	4.2e-23
Syngap1	39.94	29.18	0.46	8.2e-08
Ube2ql1	26.39	19.15	0.46	2.5e-04
Disc1	35.13	25.32	0.46	6.3e-07
Ccdc81	17.75	13.31	0.46	2.6e-05
Chn1os3	4.52	3.14	0.46	4.7e-02
Adgrb3	2089.56	1532.71	0.46	2.3e-27
Ankrd13d	60.64	44.15	0.46	4.1e-13
Garnl3	245.64	180.08	0.46	8.1e-26
9330104G04Rik	4.25	3.34	0.46	2.7e-02
Tmem132a	55.57	40.52	0.46	2.0e-10
Dmc1	11.02	8.01	0.46	4.5e-03
Prim2	37.1	26.92	0.46	1.1e-12
Unc80	458.9	335.07	0.46	2.6e-22
Tomm20l	18.59	14.09	0.46	3.9e-06
Slc8a3	195.22	142.74	0.45	9.3e-14
Zfp618	96.66	71.5	0.45	2.8e-10
Smarcd3	89.04	66.94	0.45	2.3e-12
Arrdc1	40.54	29.76	0.45	1.9e-07
Dnm3	636.36	465.44	0.45	4.0e-23
Inha	48.55	35.79	0.45	6.7e-11
4921534H16Rik	58.8	43.14	0.45	9.8e-09
Pkd1	160.71	118.21	0.45	3.7e-25
Taf1b	119.46	87.41	0.45	6.5e-25
Jakmip1	236.35	168.39	0.45	1.0e-11
D830024N08Rik	147.51	110.9	0.45	7.2e-14
Ccdc120	10.34	7.76	0.45	7.6e-04
Dmtn	135.14	99.63	0.45	8.7e-15
9630028H03Rik	86.7	65.91	0.45	3.9e-05
Kcnt1	85.35	62.93	0.45	1.9e-14
Rab11fip4os1	12.48	9.63	0.45	1.1e-03
Xpr1	266.61	195.45	0.45	2.1e-17
Tmem150cos	7.33	5.4	0.45	2.8e-02
Slc25a13	36.08	27.16	0.45	3.6e-05
Hapln4	30.14	23.54	0.45	3.2e-04
Fkbp5	64.97	49.45	0.45	8.2e-05
Arrb2	51.28	36.41	0.45	9.2e-09
Ppef2	7.22	5.27	0.45	2.9e-02
C530050E15Rik	4.71	3.7	0.45	3.0e-02
Me2	48.64	35.95	0.45	1.1e-10
Mcm8	10.14	7.5	0.45	5.0e-04
Ndufaf6	51.99	38.27	0.45	1.1e-12
Wscd2	101.22	73.33	0.45	5.4e-24
Shtn1	180.89	134.2	0.45	3.4e-10
Foxk1	51.84	37.49	0.45	4.6e-10
Scn2a	379.96	276.64	0.45	3.2e-18
Rfesd	33.1	24.67	0.45	6.4e-10
Tenm3	587.72	429.65	0.45	1.2e-08
Map6	158.52	116.53	0.45	8.9e-26
Kndc1	80.25	59.06	0.45	2.6e-11
Ociad2	54.95	41.09	0.45	1.3e-08
Spata32	5.47	4.28	0.45	2.2e-02
Polq	9.29	6.8	0.45	3.8e-03
Dpp10	784.59	583.18	0.45	8.4e-19
Bcl7c	50.97	36.8	0.45	1.1e-11
Atp6v0a4	11.86	8.71	0.45	3.4e-04
4430402I18Rik	124.13	88.74	0.45	1.1e-13
Tnpo3	142.03	104.82	0.45	1.1e-36
Lcor	298.96	217.97	0.45	1.3e-30
Ephb2	113.69	85.83	0.45	2.0e-09
Wdr13	52.28	38.47	0.45	2.7e-15
Kdm1b	13.36	9.73	0.45	5.4e-05
Rnf150	134.14	99.07	0.45	8.9e-16
Kcng2	9.91	7.34	0.44	2.8e-02
Lrch1	265.08	195.49	0.44	1.2e-22
Rims2	785.46	579.42	0.44	4.0e-27
Prelid3a	159.86	116.74	0.44	6.0e-14
Noc2l	37.03	27.42	0.44	9.9e-12
Rapgef4os1	80.05	60.73	0.44	1.5e-12
Klhl33	35.27	26.45	0.44	1.1e-07
Nav1	262.74	193.95	0.44	8.9e-24
Hectd3	32.46	23.89	0.44	6.2e-10
Eme2	11.01	7.82	0.44	1.8e-03
0610040F04Rik	16.49	12.39	0.44	1.3e-03
Scaper	365.01	270.12	0.44	3.6e-22
Zfp972	15.95	11.66	0.44	1.2e-03
Fut8	238.06	176.38	0.44	2.1e-30
Pet100	64.14	48.43	0.44	6.1e-12
Dcx	71.29	53.42	0.44	2.7e-08
Stk26	11.2	8.17	0.44	2.0e-02
Apba1	295.96	220.73	0.44	2.7e-14
Socs5	47	34.2	0.44	7.3e-09
Lrrc7	735.5	549.62	0.44	5.0e-14
Slc1a1	80.93	59.8	0.44	2.0e-13
Dcun1d2	51.79	38.36	0.44	1.8e-10
Brdt	53.68	39.37	0.44	8.6e-16
Cdh11	120.16	88.99	0.44	9.5e-11
Enkd1	15.34	10.79	0.44	7.9e-05
4930570G19Rik	39.17	28.69	0.44	1.3e-08
Itga10	10.95	7.85	0.44	1.6e-02
Mri1	53.32	39.03	0.44	3.5e-08
Bbs5	97.21	72.01	0.44	7.3e-19
Mterf1b	8.87	6.35	0.44	3.3e-03
Ankrd13a	80.21	59.17	0.44	8.0e-12
Oacyl	7.79	5.84	0.44	3.8e-02
Add2	158.73	117.68	0.44	7.0e-18
Lclat1	92.62	67.94	0.44	1.7e-18
Riox2	16.09	12.02	0.44	1.8e-05
Scarb1	73.07	53.25	0.44	1.8e-11
Ydjc	39.43	29.61	0.44	8.0e-09
Ovgp1	9.79	7.28	0.44	3.6e-03
Masp2	11.07	8.32	0.44	3.2e-03
Fam189b	58.24	43.19	0.44	1.5e-13
Tunar	10.44	7.6	0.44	6.1e-03
Srsf9	41.01	30.04	0.44	2.6e-11
Stk35	18.57	13.45	0.44	6.5e-06
Pnma1	6.78	5.22	0.44	1.1e-02
Hsf4	20.76	15.41	0.44	4.1e-06
Atxn7l1os1	11.7	8.82	0.44	1.0e-03
Sbspon	18.23	13.2	0.44	3.5e-05
Zfp367	21.18	16.14	0.44	2.8e-04
Tecpr1	93.75	68.79	0.43	1.5e-17
Tgfa	16.27	11.86	0.43	8.6e-03
Sgsm3	94.34	71.19	0.43	1.6e-16
Kcnab2	30.15	22.64	0.43	4.7e-06
Tpbg	28.45	21.29	0.43	1.0e-03
Usp49	9.8	7.19	0.43	6.3e-04
Usp46	95.57	71.38	0.43	3.1e-22
Timm9	130.32	97.63	0.43	3.2e-24
Tmem8	10.83	7.87	0.43	1.3e-03
1700016K05Rik	11.51	8.27	0.43	5.9e-03
Cabp1	35.14	26.74	0.43	2.4e-09
Akap7	103.06	76.38	0.43	1.0e-18
Pitpnm1	74.36	55.31	0.43	4.5e-14
Gprasp1	152.37	114.6	0.43	5.5e-17
Cyp4x1	31.93	23.93	0.43	9.1e-07
Tnfrsf23	5.04	3.86	0.43	1.8e-02
Krt222	44.86	33.62	0.43	4.4e-10
Mov10	30.16	22.17	0.43	3.4e-07
Syn1	212.5	159.15	0.43	1.9e-20
Dmxl2	157.13	117.23	0.43	8.4e-25
Dnm3os	7.44	5.62	0.43	1.4e-02
Dph2	6.11	4.38	0.43	1.1e-02
Gpr173	23.98	17.59	0.43	3.8e-07
Nsun2	52.9	39.86	0.43	3.5e-08
Nfil3	6.8	5.03	0.43	2.1e-02
Cntnap1	53.2	39.91	0.43	2.9e-09
Trim66	21.26	15.88	0.43	2.7e-06
Kcnc3	65.58	48.57	0.43	2.6e-10
Kcnq1	272.78	204.2	0.43	8.3e-19
Commd10	67.37	49.89	0.43	2.6e-10
Il17d	15.18	11.23	0.43	2.0e-04
Gpatch4	28.27	21.27	0.43	1.3e-05
Adgra2	9.06	6.66	0.43	2.1e-03
Cers1	26.43	19.88	0.43	1.2e-06
Sdad1	35.57	26.6	0.43	1.2e-10
Dok3	12.08	8.92	0.43	2.2e-02
Pigk	156.99	116.95	0.43	6.8e-19
Klhl10	46	34.67	0.43	9.1e-08
Mapkbp1	84.55	63.73	0.43	3.6e-16
Prepl	112.9	84.32	0.43	1.5e-14
Mak	17.39	12.95	0.43	1.4e-04
Nmnat2	263.34	197.21	0.43	3.0e-13
Map7	224.39	169.07	0.43	3.0e-11
Ddx31	32.39	23.82	0.43	7.9e-08
Lingo3	10.09	7.5	0.43	1.2e-02
March1	844.61	628.53	0.43	2.5e-08
Slc24a3	462.31	346.14	0.43	4.6e-23
9130015G15Rik	13.55	9.91	0.43	6.0e-03
Lzts3	42.36	31.98	0.43	1.9e-09
Eftud2	91.3	68.43	0.43	2.5e-22
Tmem181a	218.09	162.34	0.43	1.4e-26
Lypd1	34.16	26.03	0.43	6.8e-04
Gabra3	140.03	104.65	0.42	1.3e-14
Ak5	195.48	146.45	0.42	1.4e-17
Gamt	14.26	11.45	0.42	1.2e-02
Vps37d	60.44	44.68	0.42	1.1e-07
Pus7	75.35	56.83	0.42	1.5e-14
Kcnd3	194.82	145.51	0.42	7.2e-14
Tex10	50.2	37.31	0.42	2.2e-11
Sipa1l1	208.68	155.68	0.42	4.8e-28
Pld5	158.81	117.78	0.42	1.3e-07
Nvl	155.87	116.25	0.42	1.6e-16
A430090L17Rik	17.82	13.44	0.42	5.1e-04
A930015D03Rik	176.53	131.02	0.42	2.9e-16
Trio	298.12	225.03	0.42	3.1e-18
Celsr3	37.58	28.31	0.42	9.3e-08
A230057D06Rik	674.57	498.37	0.42	3.6e-22
Dglucy	29.02	21.36	0.42	2.9e-06
Tomm40l	17.15	12.71	0.42	2.7e-04
Mzf1	19.84	15.33	0.42	8.8e-05
Stk39	134.53	101.16	0.42	2.9e-20
Tnik	705.94	534.69	0.42	5.6e-18
L3mbtl1	30.3	22.56	0.42	2.3e-05
Ppm1l	164.66	121.23	0.42	5.0e-09
Naaladl2	371.34	280.67	0.42	9.9e-14
4930545L23Rik	35.29	25.63	0.42	7.6e-06
9430015G10Rik	32.05	24.26	0.42	1.6e-06
Wee1	19.23	14.27	0.42	9.3e-04
Clcn2	32.17	23.69	0.42	1.4e-05
Dgkh	152.08	112.8	0.42	6.6e-09
Lins1	14.95	11.35	0.42	2.4e-04
Ylpm1	192.28	144.97	0.42	4.1e-17
Xkr6	331.9	253.06	0.42	2.5e-17
Suds3	81.42	61.03	0.42	5.0e-13
Trub1	38.9	29.28	0.42	3.9e-08
Prag1	39.2	30.11	0.42	5.4e-04
Slc24a2	413.23	318.26	0.42	2.0e-06
Relt	17.48	13.43	0.42	3.0e-05
Zdhhc22	37.68	29.07	0.42	8.7e-05
Cpsf4l	30.86	23.44	0.42	8.1e-07
Tmem179	141.05	108.18	0.42	3.6e-09
Mok	97.93	72.09	0.42	9.4e-10
Necab2	25.71	19.08	0.42	1.4e-03
Ccdc112	56.75	43.01	0.42	1.1e-11
Ipo5	44.54	33.23	0.42	2.0e-06
Habp4	76.64	58.15	0.42	2.0e-09
Mast4	428.61	325.92	0.42	1.6e-05
Supt3	149.75	113.54	0.42	2.4e-16
Klhl23	44.91	33.66	0.42	6.3e-10
Prss36	35.12	26.9	0.41	2.5e-07
Plekha6	143.32	108.7	0.41	7.5e-14
Ankrd27	31.39	22.93	0.41	1.3e-06
Slc25a32	35.87	26.97	0.41	2.6e-05
C130026I21Rik	8.72	6.38	0.41	3.6e-03
Ncam2	1035.1	780.65	0.41	5.1e-12
Rpl27	4.75	3.91	0.41	4.1e-02
Dagla	55.8	41.89	0.41	7.4e-08
Abcc4	31.07	23.38	0.41	1.2e-02
Cdk20	12.35	9.29	0.41	5.4e-04
Kalrn	574.47	432.23	0.41	3.3e-25
Rpl9	22.48	16.8	0.41	2.8e-06
Zcchc18	534.98	407.51	0.41	1.3e-13
Ahi1	1625.32	1213.34	0.41	8.0e-15
Sept6	50.95	38.47	0.41	1.1e-09
Exosc2	24.21	18.92	0.41	2.3e-03
Ntng1	341.78	255.02	0.41	1.9e-04
Ptbp2	197.09	147.38	0.41	3.5e-24
BC065403	8.68	6.97	0.41	3.9e-02
Map2k4	298.65	226.4	0.41	8.6e-19
Casz1	26.06	19.25	0.41	6.7e-06
Hook1	93.79	70.89	0.41	1.9e-08
Fam126b	136.78	103.48	0.41	1.4e-11
Twf2	41.58	30.74	0.41	9.8e-06
Arhgap33os	21.93	16.31	0.41	2.3e-02
Hrh2	8.97	6.91	0.41	7.2e-03
Kif2a	150.14	112.77	0.41	4.9e-24
Tfap2d	10.01	7.92	0.41	2.3e-02
9030624G23Rik	5.65	4.33	0.41	2.9e-02
Mtor	80.6	60.47	0.41	1.8e-15
Pabpc4	117.72	88.1	0.41	9.8e-13
Adgb	37.46	28.77	0.41	1.9e-02
Actr1b	127.26	96.89	0.41	2.3e-15
Zfp941	61.35	46.59	0.41	5.4e-08
D630045J12Rik	96.24	73.24	0.41	2.7e-13
Trpm2	34.09	25.85	0.41	4.8e-05
Dnah7b	51.76	38.94	0.41	5.6e-05
Mctp1	220.38	169.9	0.41	3.9e-07
Klhdc9	18.21	14.07	0.41	8.4e-04
Kif22	11.31	8.36	0.41	2.3e-02
Ppip5k1	108.69	82.95	0.41	5.7e-14
Telo2	48.77	36.54	0.41	5.2e-07
Zmym6	118.46	89.35	0.4	1.2e-09
Fyb2	14.12	10.24	0.4	1.3e-02
P3h3	73.44	57.41	0.4	1.2e-07
Ccdc6	63.65	47.96	0.4	4.6e-15
Fbxl19	47.2	35.06	0.4	4.7e-09
Ltbp4	49.03	36.9	0.4	2.5e-09
Cyld	180.8	136.39	0.4	5.9e-18
Gjd2	4.23	3.2	0.4	4.5e-02
Nob1	80.15	60.8	0.4	1.9e-15
Peli1	90.04	67.94	0.4	9.9e-10
Bzw2	79.34	60.85	0.4	5.4e-13
Shank3	105.97	81.76	0.4	1.4e-09
Nhsl2	81.31	62.28	0.4	9.2e-10
1700003E16Rik	12.93	9.53	0.4	6.7e-04
Rnf126	53.46	40.51	0.4	1.5e-12
Stx2	55.22	42.07	0.4	2.1e-10
Arntl	77.89	59.97	0.4	5.9e-09
Decr2	34.71	26.07	0.4	2.1e-09
Nt5c3b	38.79	29.62	0.4	6.2e-07
Cbx4	35.2	26.36	0.4	9.7e-07
5730522E02Rik	197.87	151.26	0.4	6.1e-06
Atp9a	253.9	191.91	0.4	3.4e-21
Slc26a11	41.26	30.28	0.4	7.4e-08
Acvr2a	87.43	66.36	0.4	5.9e-13
Lrrc4	150.15	113.46	0.4	1.8e-22
Tmem241	47.28	36.06	0.4	6.4e-08
Gab3	46.42	35.15	0.4	6.4e-08
Tmem120b	40.19	30.03	0.4	2.3e-10
Cabin1	150.16	114.51	0.4	1.8e-19
Gnl3	92.42	70.34	0.4	4.9e-15
Flt3	33.98	27.64	0.4	2.0e-03
Agap2	40.98	30.96	0.4	6.1e-10
Mtmr12	46.7	34.66	0.4	1.7e-07
Prmt3	43.03	32.52	0.4	1.9e-09
Ica1l	80.45	61.65	0.4	1.4e-07
Cep78	96.1	73.22	0.4	7.5e-15
Mta3	114.49	87.43	0.4	2.4e-16
Has1	16.23	12.39	0.4	1.7e-04
Pkd1l1	7.52	5.48	0.4	3.1e-02
B3galnt2	42.16	32.16	0.4	5.4e-07
Mettl2	61.34	46.6	0.4	6.4e-11
Senp5	163.96	124.06	0.4	4.8e-19
Fn3k	27.6	21.17	0.4	1.0e-04
Dbn1	149.01	112.91	0.4	3.5e-19
Trim37	168.51	128.65	0.4	4.7e-18
Tmem231	24.16	18.57	0.4	8.3e-07
Lnpk	160.94	123.18	0.4	2.6e-10
A330074K22Rik	16.89	13.54	0.4	2.0e-03
Pak6	56.74	42.81	0.4	2.6e-08
Ankrd55	120.65	92.87	0.4	6.1e-09
Micu2	152.44	115.89	0.4	5.3e-14
Ogfod1	95.77	72.22	0.39	1.3e-13
Frmd4a	1514.04	1163.93	0.39	2.1e-15
4933406F09Rik	7.63	6.08	0.39	1.5e-02
Tcte2	131.49	102.64	0.39	2.3e-06
Thrb	290.96	221.58	0.39	4.9e-20
Psmd9	98.47	74.97	0.39	2.4e-20
Dnaaf5	21.36	15.98	0.39	7.9e-06
Kcnk10	82.28	62.86	0.39	2.1e-07
Ogfod2	16.65	12.4	0.39	3.5e-04
Rhot2	13.83	10.21	0.39	2.5e-03
Slc17a5	74.06	56.53	0.39	1.2e-07
Dab2ip	68.41	51.92	0.39	2.1e-07
Bahcc1	44.41	33.78	0.39	9.8e-07
Galnt9	46.99	36.19	0.39	2.8e-05
Nlrc3	17.39	13.63	0.39	3.2e-04
5031415H12Rik	18.87	14.26	0.39	4.2e-04
1700111N16Rik	11.39	8.39	0.39	5.0e-03
Tab3	20.25	15.57	0.39	2.2e-04
Ugcg	52.36	40.11	0.39	1.5e-08
Trmt1	87.53	67.32	0.39	2.2e-13
Mapk14	111.04	84.43	0.39	2.0e-10
B230217O12Rik	29.18	22.41	0.39	4.8e-07
Krr1	19.84	14.99	0.39	1.6e-03
Rapgef2	201.96	154.88	0.39	6.1e-10
Pds5b	189.26	144.53	0.39	1.6e-20
Pdzd2	88.69	68.01	0.39	3.6e-13
Entpd6	72.56	55.38	0.39	3.0e-09
Frmpd3	121.95	94.73	0.39	3.4e-08
4931423N10Rik	6.62	5.15	0.39	3.6e-02
Vps50	132.76	100.78	0.39	3.7e-20
Ahctf1	82.06	62.55	0.39	8.2e-17
Fhl2	7.84	5.99	0.39	1.4e-02
Ier5l	12.43	8.77	0.39	4.3e-02
Zbtb43	22.81	17.54	0.39	5.2e-05
Cacna1b	305.06	236.06	0.39	3.4e-14
Utp20	38.48	28.89	0.39	3.6e-08
Snhg11	10776.17	8274.05	0.39	6.8e-13
Syt14	98.98	76.93	0.39	1.1e-08
Tyk2	34.94	26.47	0.39	2.7e-06
Extl1	10.97	8.18	0.39	3.1e-02
Rtl1	54.12	41.78	0.39	2.4e-07
Pigl	37.55	29.51	0.39	1.9e-05
Neto1	83.66	64.53	0.39	4.4e-07
Nptn	512.12	391.31	0.39	3.1e-08
Tro	202.34	155.14	0.39	5.7e-17
Rasgef1c	13.39	10.49	0.39	1.8e-02
Itga11	28.07	21	0.39	5.7e-05
Lrp1b	2807.68	2171.38	0.39	2.0e-10
Fam131a	78.31	58.94	0.39	4.9e-10
Sacs	55.82	42.59	0.39	1.5e-10
Rrp12	15.53	11.87	0.39	6.2e-04
Pcolce2	42.2	32.31	0.39	7.6e-06
Mageb18	10.07	7.62	0.39	5.1e-03
Senp8	133.4	100.82	0.39	1.7e-10
Bicdl1	126.51	99.64	0.39	4.2e-08
Dock9	185.26	143.92	0.38	1.4e-08
Trim46	110.67	84.94	0.38	2.1e-14
Cadps	716.3	556.79	0.38	7.4e-11
Nme4	14.6	11.16	0.38	1.1e-03
Eipr1	67.58	51.91	0.38	2.8e-09
Meaf6	94.41	72.28	0.38	7.2e-16
Adgrb1	106.83	82.44	0.38	2.0e-14
L2hgdh	29.22	22.83	0.38	3.5e-07
Gdap1	88.41	67.82	0.38	5.2e-10
Spata24	28.65	21.72	0.38	3.5e-06
Rnf157	168.95	132.84	0.38	9.3e-09
Speg	51.93	40.41	0.38	1.2e-10
Zc3h6	117.51	90.32	0.38	1.1e-19
Smim14	85.19	66.47	0.38	1.8e-08
Tbc1d9	88.91	68.42	0.38	4.3e-14
4930478K11Rik	7.54	5.85	0.38	1.7e-02
Tmem63b	122.69	93.61	0.38	7.4e-22
Ablim1	227.11	176.42	0.38	6.3e-09
Cys1	28.76	21.99	0.38	7.8e-05
Ccdc7b	19.63	14.95	0.38	8.5e-03
Arhgap1	39.56	29.93	0.38	1.2e-06
Atxn7l1os2	7.29	5.49	0.38	1.6e-02
Efcab6	16.74	13.04	0.38	7.4e-04
Pnma3	99.23	76.57	0.38	1.4e-14
Cpt1c	113.1	87	0.38	1.1e-14
Zgpat	46.3	35.19	0.38	4.0e-08
Mapre2	208.33	159.84	0.38	8.0e-23
Bsn	116.69	89.86	0.38	5.8e-13
Arhgef7	125.89	96.66	0.38	3.1e-09
Stox1	32.29	24.69	0.38	1.9e-06
Ankef1	22.61	17.46	0.38	4.4e-06
Yeats2	130.75	101.15	0.38	9.0e-13
A230077H06Rik	10.5	8.26	0.38	5.0e-03
Klhl32	149.11	116.03	0.38	1.3e-10
Wdr34	86.7	66.56	0.38	1.0e-14
Sdk1	347.57	275.66	0.38	4.1e-09
Crtc3	164.92	127.36	0.38	1.1e-17
Dnmt3aos	6.48	4.88	0.38	2.3e-02
Tcea2	42.33	33.4	0.38	8.0e-07
Pacsin1	332.86	257.99	0.38	9.1e-34
1810043G02Rik	42.6	32.43	0.38	3.9e-07
Mcmdc2	19.18	14.44	0.38	4.4e-03
Serac1	37.02	29.07	0.38	1.0e-04
Rabep1	325.48	249.76	0.38	4.1e-26
1700084C06Rik	89.31	68.1	0.38	5.0e-10
Sympk	89.6	69.3	0.38	2.3e-15
Crocc2	11.89	9.28	0.38	3.1e-03
4632404H12Rik	8.51	6.65	0.38	1.3e-02
Nudcd1	52.51	40.4	0.38	2.7e-10
Ndrg1	33.53	25.8	0.38	6.5e-04
Arhgap33	43.29	33.15	0.38	3.5e-09
Sbf2	315.91	244.7	0.38	6.2e-21
Spata7	177.85	136.3	0.37	1.6e-08
Zfr2	93.68	73.29	0.37	2.7e-08
Fam13c	96.84	75.17	0.37	1.6e-10
Frg2f1	9.87	7.52	0.37	3.4e-03
Ppih	21.71	17.24	0.37	4.5e-04
Lin37	18.23	14.81	0.37	1.4e-03
Aacs	48.02	37.8	0.37	4.1e-09
Dalrd3	120.03	92.54	0.37	6.8e-15
Lrrcc1	70.44	54.95	0.37	4.4e-11
Bcs1l	50.69	38.92	0.37	6.1e-10
Sprtn	16.57	12.94	0.37	3.1e-03
Xkr4	884.93	690.83	0.37	2.3e-09
Dync1i2	297.72	231.63	0.37	4.6e-12
Trpv2	44.29	33.74	0.37	2.1e-07
Rpl35	7.19	5.6	0.37	1.5e-02
Dnajc11	80.82	62.36	0.37	9.8e-09
Hs3st1	24.63	19.37	0.37	1.5e-04
Nr2f1	31.38	24.56	0.37	1.0e-04
Lamc1	58.78	45.1	0.37	3.9e-09
Fam124a	32.93	25.7	0.37	8.2e-04
Dync2h1	221.78	171.75	0.37	1.0e-11
Cog1	38.86	30.21	0.37	1.8e-07
Sergef	147.62	113.69	0.37	2.7e-10
Nle1	29.35	23.42	0.37	4.4e-04
Lrrc1	52.63	40.61	0.37	1.0e-06
Top1mt	15.35	12.06	0.37	1.5e-03
Cyp2c66	15.7	12.23	0.37	2.7e-04
1600020E01Rik	72.43	56.39	0.37	2.3e-11
Ak4	17.4	13.07	0.37	2.4e-04
Nup210	37.58	29.07	0.37	1.1e-05
Ankrd39	6.07	4.47	0.37	4.4e-02
Wdr7	178.07	138.61	0.37	4.9e-23
1700126G02Rik	39.25	30.7	0.37	2.1e-05
Deaf1	55.82	43.54	0.37	1.1e-08
Epb41	135.09	106	0.37	5.1e-14
Fxyd4	45.12	35.09	0.37	1.2e-04
Mcph1	86.37	67.88	0.37	1.8e-10
Taf5l	20.58	16.08	0.37	1.2e-04
Dennd3	30.13	23.48	0.37	2.4e-05
Map3k12	68.6	53.75	0.37	2.5e-12
Kcnq1ot1	480.29	366.98	0.37	5.0e-09
Klhl7	210.61	162.59	0.37	4.5e-19
Stxbp5	162.81	127.62	0.37	1.7e-08
Chl1	203.85	154.01	0.37	5.8e-07
Apc	443.29	347.12	0.37	8.6e-10
Pcgf6	61.26	48.23	0.37	8.7e-09
Lrrc8c	43.84	34.19	0.37	6.7e-05
Cep104	38.07	28.93	0.37	1.8e-07
Dscam	897.3	707.46	0.37	4.4e-12
Gsta3	7.33	5.82	0.37	2.2e-02
Slitrk1	63.53	49.5	0.37	1.3e-08
Polr3a	49.68	38.52	0.37	1.2e-09
Mthfr	37.06	29.08	0.37	2.8e-08
Plppr4	119.52	92.62	0.37	4.5e-10
Ackr1	14.43	11.05	0.37	2.6e-03
Jdp2	29.39	22.47	0.37	1.5e-03
Uggt2	124.76	97.56	0.37	6.6e-10
Ints10	71.71	56.07	0.37	1.5e-11
Apoa1	12.77	9.76	0.37	7.5e-03
Cx3cl1	84.78	65.84	0.37	5.6e-08
Nav3	1063.18	835.15	0.37	2.6e-15
Tmem161b	121.7	95.08	0.37	1.3e-18
Rnf32	46.72	36.89	0.37	2.5e-07
Ercc8	24.84	19.82	0.37	9.7e-05
Prrg3	13.67	10.62	0.37	1.0e-02
Bbs1	22.38	17.35	0.37	4.9e-05
Palm2	151.77	118.39	0.37	6.2e-12
Igdcc4	67.02	52.09	0.37	3.9e-12
Phex	6.64	5.31	0.37	3.1e-02
Ica1	201.42	157.47	0.36	6.4e-14
Cfap65	24.36	19.17	0.36	9.9e-03
Pnpt1	94.22	73.19	0.36	1.9e-08
Ttbk1	56.12	43.86	0.36	2.9e-09
Cntrl	40.16	31.19	0.36	4.2e-04
Cacnb3	33.48	26.26	0.36	2.2e-05
Taf1a	41.89	32.85	0.36	2.5e-06
Fgf14	2769.56	2178.02	0.36	4.4e-11
Acvr1b	36.93	28.7	0.36	9.8e-07
Tmem150c	70.08	54.38	0.36	7.2e-07
Dzank1	192.82	150.51	0.36	3.9e-12
Arhgef33	49.97	38.82	0.36	3.3e-06
Malt1	45.02	34.33	0.36	4.0e-06
Mrgbp	35.5	28	0.36	2.0e-06
Letmd1	39.92	31.72	0.36	1.4e-08
Srgap3	397.46	310.75	0.36	2.8e-19
Crb1	24.19	18.55	0.36	9.4e-03
Hhipl1	20.91	16.34	0.36	9.5e-04
Sema6a	167.19	129.11	0.36	8.4e-07
Eefsec	110.21	85.4	0.36	2.0e-13
Lrrc40	45.43	35.41	0.36	6.1e-09
Mlxip	69.95	54.23	0.36	3.5e-08
Cmtm4	70.79	55.32	0.36	4.8e-13
Odf2l	43.4	33.81	0.36	3.0e-06
Ttc39a	29.45	23.12	0.36	3.7e-07
Sppl2a	71.42	55.3	0.36	3.1e-06
Hmgcr	80.78	62.83	0.36	7.2e-07
Atp1a3	489.92	380.71	0.36	4.2e-13
Dhcr24	41.92	32.27	0.36	1.4e-07
Rps6kb2	72.23	55.52	0.36	3.8e-10
Tspan5	183.11	143.49	0.36	1.4e-20
Colgalt1	62.55	47.9	0.36	4.8e-06
Fam160a2	55.62	43.54	0.36	1.5e-10
Mcf2l	147.91	115.81	0.36	2.3e-13
Rtbdn	35.77	27.94	0.36	3.4e-03
Ppfibp1	52.23	40.37	0.36	9.6e-05
4933431E20Rik	22.18	16.96	0.36	2.6e-04
Angpt2	34.38	26.91	0.36	2.8e-06
Jakmip3	91.88	73.09	0.36	5.1e-07
Cutc	15.04	11.47	0.36	1.1e-02
Efna3	19.2	15.77	0.36	1.4e-03
Ssbp4	347.27	268.04	0.36	1.1e-04
Ccdc159	19.8	15.7	0.36	6.2e-04
Polr1a	41.89	32.69	0.36	8.3e-06
Armc6	36.61	28.11	0.36	5.4e-05
Skida1	36.23	28.58	0.36	9.2e-07
Nebl	587.98	461.4	0.36	5.9e-12
4930554G24Rik	5.38	4.26	0.36	4.6e-02
Cwf19l1	10.72	8.56	0.36	4.6e-03
Fopnl	56.14	44.13	0.36	4.3e-11
Wipf3	44.26	34.32	0.36	1.1e-06
Catsper2	51.93	40.36	0.36	1.9e-04
Nova1	204.68	159.01	0.36	1.3e-07
Ltbp3	48.11	37.54	0.36	5.6e-07
Zmat1	78.33	61.12	0.36	6.9e-10
Grik5	154.19	120.11	0.36	3.4e-19
Csnk1g1	211.34	164.29	0.36	3.5e-17
Abcb9	43.26	34.17	0.36	6.3e-07
Usp21	17.6	13.66	0.36	8.9e-04
Fgf10	26.58	20.29	0.36	2.2e-02
Spats2l	95.07	74.94	0.36	1.2e-05
Hsf5	12.29	9.43	0.36	3.3e-03
Nars2	49.16	38.69	0.36	2.2e-08
Cobl	97.2	77.07	0.36	4.4e-06
Spata1	58.13	45.6	0.36	1.0e-05
Ppp2r2c	92.51	72.42	0.36	2.4e-08
Hs3st5	221.85	173.66	0.35	1.8e-03
Nr6a1os	53.51	41.48	0.35	7.7e-06
Lss	13.02	10.5	0.35	6.8e-03
Map3k15	12.25	9.7	0.35	6.9e-03
Chd1l	14.34	11.17	0.35	9.2e-03
Ank	143.07	111.82	0.35	1.7e-14
Cmc2	23.62	18.86	0.35	1.1e-03
Parpbp	7.26	5.81	0.35	3.4e-02
Tbl3	43.9	33.66	0.35	6.2e-05
Hnrnpm	130.74	102.1	0.35	2.4e-11
Porcn	37.14	29.36	0.35	8.8e-06
Zdhhc8	78.75	60.92	0.35	2.1e-07
Rnaseh2b	19.51	15.34	0.35	7.3e-04
Scpep1os	10.61	8.39	0.35	5.2e-03
2010009K17Rik	6.9	5.42	0.35	4.3e-02
Alg13	35.22	27.8	0.35	9.9e-06
Zc3h7b	94.63	73.84	0.35	1.2e-10
Camk2a	263.59	206.55	0.35	8.7e-21
Ptprn2	871.69	688.73	0.35	5.1e-10
Bend7	45.07	34.91	0.35	1.6e-03
Dpp7	20.86	16.59	0.35	3.1e-04
Zfp799	119.6	93.66	0.35	5.4e-18
Ttc14	357.66	273.41	0.35	1.3e-11
Prmt7	78.33	61.8	0.35	1.4e-09
Shank1	188.19	147.85	0.35	5.1e-14
Hacd1	109.2	86.5	0.35	1.5e-08
Dusp15	42.12	33.23	0.35	2.6e-05
Rpusd1	24.46	20.23	0.35	2.3e-04
Mbnl2	413.08	326.05	0.35	3.3e-16
Dhdds	128.63	100.5	0.35	3.0e-14
Rcc1l	29.62	23.4	0.35	2.3e-06
Bop1	33.73	26.3	0.35	1.0e-06
Stxbp1	237.34	186.99	0.35	2.9e-24
Fxyd7	52.74	44.77	0.35	7.1e-03
Cpsf4	27.15	21.24	0.35	8.8e-05
Osbpl9	418.09	330.29	0.35	9.8e-13
Sdhaf3	35.89	28.77	0.35	4.7e-05
2810049E08Rik	15.25	12.47	0.35	6.9e-03
Morn4	39.83	30.85	0.35	1.1e-07
Zfp408	42.8	32.98	0.35	1.7e-07
[truncated: 17,480 more rows]
