# Supplementary material for: Cross-species analysis defines the conservation of anatomically segregated VMH neuron populations
Source: eLife journal article supplement (doi:10.7554/elife.69065), 2021-05-21
Supplement: supp [file elife-69065-supp-v1.zip › elife_poa_e69065_Supplementary_file_7.csv]

Gene	QRFPR	ESR1_1	ESR1_2	NFIB_1	NFIB_2	FOXP2_2	LEPR
A1BG	0	0.45	0.39	0	0	0	0
AACS	0	0	0.03	0	0	0	0
AAMDC	0	0.53	0	0	0	0	0
AARS1	0	0	0	0	0	0	0
AASS	0.39	0	0	0	0.56	0	0
AATK	0.01	0	0	0	0	0	0
ABAT	0	0	0	0.15	0	0.05	0
ABCA1	0	0.88	0.29	0	0	0	0
ABCA12	0	0	0.69	0.34	0	0	0
ABCA3	0.01	0	0	0	0	0	0
ABCA5	0	0	0	0	0	0.07	0
ABCA6	0	0.05	0	0.27	0	0.24	0.02
ABCB1	0.26	0	0	0	0	0	0.04
ABCB7	0	0	0	0.38	0	0.04	0
ABCC1	0	0.17	0.38	0.03	0	0	0
ABCC10	0.03	0	0	0	0	0	0
ABCC3	0	0	0.15	0.78	0	0	0.11
ABCC4	0	0	0.3	0	0	0	0.07
ABCC5	0	0	0	0	0	0	0.2
ABCC6	0	0.89	0.48	0	0	0	0
ABCC8	0	0	0	0.11	0.11	0	0.16
ABCD2	0	0.02	0.27	0	0	0	0
ABCD3	0	0.14	0	0	0	0	0
ABCD4	0.11	0	0	0	0	0.06	0
ABCG1	0	0	0	0.09	0	0	0
ABHD12B	0	0	0.47	0	0	0	0.52
ABHD17B	0	0	0.1	0	0	0	0
ABHD2	0	0	0.01	0.05	0.12	0	0
ABHD3	0.54	0	0	0	0	0	0
ABHD6	0	0.18	0	0	0	0	0.01
ABI3BP	0	0	0	0.91	0	0.64	0
ABLIM1	0	0.03	0	0.2	0	0	0
ABLIM2	0	0	0.09	0.06	0	0.2	0.05
ABLIM3	0	0.05	0	0	0	0	0
ABO	0.4	0	0.27	0	0	0	0
ABTB2	0	0.67	0.05	0	0	0	0
ACACA	0.02	0	0	0	0	0	0
ACAP3	0	0	0	0	0	0	0
ACBD6	0	0.15	0	0.01	0	0	0
ACER2	0	0.41	0.33	0	0	0	0
ACER3	0	0.06	0	0	0	0	0
ACOT11	0	0	0.22	0	0.58	0	0
ACSL3	0.02	0	0	0	0	0	0
ACSM4	0	0.08	0.1	0	0	0	0
ACSS3	0.2	0	0.11	0	0	0	0
ACTA2	0	0	0	0.23	0.34	0	0
ACTC1	0.18	0	0.28	0	0	0	0.64
ACTL6B	0	0.19	0.05	0	0	0	0
ACTN1	0	0	0	0	0	0	0.21
ACTN2	0	0.55	0.14	0	0	0	0.07
ACTR1B	0	0	0.08	0	0	0	0
ACVR1	0	0	0	0	0	0	0.46
ACVR1B	0	0	0	0	0.11	0	0.07
ACVR1C	0	0	0	0	0.03	0	0.93
ACVR2A	0	0	0	0	0	0	0
ACY1	0	0.02	0.1	0.06	0	0	0
ACYP2	0	0	0	0	0	0	0
ADAL	0.04	0.02	0.06	0	0	0	0
ADAM11	0.06	0	0.19	0	0	0	0.05
ADAM12	0.29	0	0	0	0	0	0.36
ADAM19	0.25	0.5	0.11	0	0	0	0
ADAM22	0	0	0.08	0.2	0	0.16	0
ADAM23	0	0	0	0	0	0	0
ADAM28	0	0	0	0.29	0.24	0.32	0.25
ADAM9	0	0	0	0	0.17	0	0.07
ADAMTS10	0	0.04	0.23	0	0	0	0
ADAMTS12	0	0.68	0	0	0.81	0	0
ADAMTS13	0	0	0.51	0	0	0	0
ADAMTS14	0.05	0	0	0	0.17	0	0.71
ADAMTS16	0	0	0	0	0.24	0	0.72
ADAMTS17	0.08	0.9	0.31	0	0	0	0
ADAMTS18	0	0.68	0.48	0	0	0	0
ADAMTS19	0	0	0	0	0.4	0.65	0
ADAMTS2	0	0.01	0.26	0	0	0	0.63
ADAMTS20	0	0.16	0.72	0	0	0	0
ADAMTS3	0	0	0	0	0.92	0	0.03
ADAMTS5	0.12	0	0.66	0	0.33	0	0
ADAMTS6	0	0	0.73	0	0	0.21	0
ADAMTS7	0.08	0.3	0.53	0	0	0	0
ADAMTS9	0	0	0	0.03	0	0.14	0.42
ADAMTSL1	0	0.55	0.09	0	0	0.85	0
ADAMTSL3	0	0	0.13	0.17	0	0	0
ADAR	0	0	0	0	0	0	0
ADARB1	0	0	0.06	0	0	0	0
ADARB2	0	0	0.47	0	0	0	0
ADCK1	0	0	0.25	0	0	0	0
ADCY1	0	0	0	0.46	0.51	0.83	0.17
ADCY2	0	0.07	0.47	0	0	0.2	0
ADCY5	0	0	0	0	0	0	0.11
ADCY8	0	0.12	0.4	0	0.51	0	0
ADCY9	0	0	0	0.13	0	0	0
ADCYAP1	0	0.34	0.08	0	0	0	0
ADCYAP1R1	0	0.07	0	0	0	0	0
ADD3	0	0.08	0	0	0	0	0.02
ADGRA1	0	0	0.3	0	0	0	0.09
ADGRA2	0.2	0	0.74	0	0	0	0
ADGRA3	0	0	0	0.31	0	0.04	0.22
ADGRB2	0	0	0	0	0.06	0	0.22
ADGRB3	0.25	0	0.24	0	0.12	0.17	0.22
ADGRD1	0.39	0	0.21	0.54	0	0	0
ADGRD2	0	0	0	0	0.93	0.05	0.27
ADGRF4	0.75	0.28	0	0	0	0	0
ADGRG1	0.06	0.03	0	0.03	0	0.17	0
ADGRG2	0.7	0	0	0	0	0	0
ADGRG5	0.36	0	0.72	0	0	0	0
ADGRG6	0	0	0	0	0.01	0	0.59
ADGRL2	0	0.1	0	0	0	0	0
ADGRL3	0.24	0	0.24	0	0.17	0.2	0.13
ADGRV1	0.24	0	0	0	0.03	0	0.25
ADK	0.15	0.11	0.16	0	0	0.03	0.02
ADORA1	0	0.03	0.35	0.35	0.21	0	0
ADRA1A	0	0	0	0.27	0.59	0	0.26
ADRA1B	0.14	0	0	0.74	0	0	0
ADRA1D	0	0	0	0	0.72	0	0
ADRB1	0	0.11	0.12	0	0.72	0	0
AEBP2	0	0.03	0	0	0	0	0
AEN	0	0	0	0.25	0	0	0.11
AFAP1	0	0.04	0	0.01	0	0.33	0
AFDN	0	0	0	0	0	0	0
AFF1	0.1	0	0	0	0	0	0.01
AFF2	0.45	0.01	0	0	0	0	0
AFF3	0.23	0.13	0.19	0	0	0.11	0
AGA	0	0.02	0.27	0	0	0	0
AGAP1	0.17	0.15	0.24	0	0	0.15	0.23
AGBL1	0	0	0	0	0	0	0.59
AGFG2	0	0	0	0	0	0	0.29
AGGF1	0.11	0	0	0.03	0	0.09	0
AGK	0	0.15	0.02	0	0	0	0
AGL	0	0	0	0.02	0	0	0.21
AGPAT4	0	0	0	0.04	0	0.13	0
AGPAT5	0	0	0	0	0.18	0	0
AGPS	0	0	0	0.07	0	0	0
AGRN	0.51	0.3	0.38	0	0	0	0
AGTPBP1	0.07	0	0	0	0	0.06	0
AGXT2	0	0.55	0.43	0	0	0.14	0
AHCTF1	0	0.09	0	0	0	0	0
AHCYL2	0	0.18	0.15	0	0	0	0.13
AHI1	0.05	0	0.07	0	0.17	0.13	0.26
AIG1	0.2	0	0	0	0	0	0.05
AIRE	0	0	0	0.31	0	0.11	0
AJAP1	0	0.14	0.41	0	0	0	0
AK4	0	0	0	0	0	0	0.48
AK5	0	0	0	0	0.24	0	0.13
AK7	0	0.3	0	0	0	0	0.22
AK8	0	0.02	0.06	0	0	0	0
AK9	0	0	0	0.04	0	0	0.57
AKAP12	0	0	0	0	0.02	0	0.33
AKAP13	0	0	0	0	0	0.32	0
AKAP6	0.22	0	0.19	0.12	0.05	0.06	0.1
AKAP7	0	0	0	0.07	0	0.13	0
AKAP9	0.1	0.01	0.21	0.03	0	0.14	0
AKR1B1	0	0.56	0.06	0	0	0	0
AKR1B10	0	0.8	0.16	0	0	0	0
AKT3	0.17	0	0.04	0.23	0.05	0.21	0.07
ALCAM	0	0.65	0.45	0.25	0	0	0
ALDH1A1	0.08	0	0	0	0.35	0.57	0
ALDH3A2	0	0.13	0.22	0	0	0	0
ALDOA	0	0	0	0	0	0.17	0
ALDOC	0	0.02	0.06	0	0	0	0
ALG12	0	0.02	0.09	0	0	0	0
ALK	0.58	0.51	0	0	0.49	0	0
ALOX12	0	0.39	0.3	0.28	0	0	0
ALOX12B	0	0.59	0.39	0	0	0	0
ALOX15	0.1	0.69	0.16	0	0	0	0
ALOX5	0	0.59	0.41	0	0	0	0
ALOXE3	0	0.14	0.61	0	0	0	0.01
ALS2	0	0	0	0	0	0	0
AMELX	0	0	0	0	0.08	0	0.6
AMIGO2	0	0	0	0.51	0.02	0.33	0.31
AMMECR1	0.02	0	0	0	0	0	0
AMOTL1	0	0	0	0.28	0.4	0.44	0
AMOTL2	0.01	0.06	0.07	0	0.38	0	0
AMPH	0	0.48	0.19	0	0	0	0
AMZ2	0	0.05	0	0.01	0	0	0
ANAPC5	0	0.14	0	0	0	0	0
ANGPT1	0.82	0	0	0	0	0.22	0.04
ANGPT2	0	0.01	0	0	0	0	0.11
ANGPTL1	0	0.5	0	0	0	0	0
ANGPTL6	0	0.15	0.35	0	0	0	0
ANK1	0.25	0.24	0.28	0	0	0	0
ANK2	0.23	0.06	0.23	0	0.13	0.19	0.24
ANK3	0.18	0	0.2	0	0.15	0.11	0.22
ANKAR	0	0	0	0.18	0	0	0
ANKDD1B	0	0	0	0	0	0.28	0.54
ANKFN1	0	0	0	0	0	0	0.39
ANKH	0	0	0	0	0	0	0.09
ANKIB1	0	0.11	0.07	0.04	0	0.06	0
ANKMY1	0	0.31	0.08	0	0	0	0
ANKRD10	0	0	0	0	0	0	0
ANKRD12	0	0.09	0	0.18	0	0	0
ANKRD13D	0	0	0.04	0	0	0	0
ANKRD18B	0	0	0	0	0	0	0.02
ANKRD24	0	0	0.09	0	0	0	0
ANKRD27	0	0	0	0	0	0.05	0.02
ANKRD31	0	0	0	0.05	0	0	0.15
ANKRD33B	0	0.95	0.19	0	0	0	0
ANKRD34B	0.08	0	0	0	0.25	0.21	0.57
ANKRD44	0.47	0	0	0	0	0.22	0
ANKRD46	0	0.13	0.16	0	0	0	0
ANKRD50	0.19	0	0	0.08	0	0.21	0
ANKRD55	0.02	0	0	0.05	0	0	0
ANKRD6	0	0	0	0.08	0	0	0.06
ANKS1A	0	0.17	0	0	0	0	0
ANKS1B	0.24	0.21	0.25	0	0	0.13	0.21
ANO3	0.11	0	0	0	0	0	0.36
ANO4	0	0.43	0.41	0	0	0	0
ANO5	0	0.19	0	0	0.04	0	0
ANO6	0	0.52	0.04	0.13	0	0	0
ANO7	0.39	0.4	0.22	0	0	0	0
ANOS1	0.13	0	0.47	0	0	0.27	0
ANTXR1	0	0.08	0	0.28	0.78	0	0
ANTXR2	0	0	0.47	0	0	0.56	0
ANXA11	0.33	0.38	0.4	0	0	0	0
ANXA3	0.55	0.55	0	0	0	0.02	0
ANXA5	0.53	0	0	0	0	0.08	0
ANXA7	0	0	0	0	0	0	0
AOPEP	0	0	0.01	0.2	0	0	0.14
AOX1	0.23	0.72	0	0	0.43	0	0
AP3B1	0	0	0	0.14	0	0	0
AP3B2	0	0	0	0	0	0	0
APBA1	0	0.01	0	0.09	0	0.21	0
APBA2	0	0	0	0.08	0.16	0	0
APBB1	0	0.12	0.04	0	0	0	0
APBB1IP	0.36	0	0	0	0	0.95	0
APBB2	0.25	0	0	0	0	0.13	0.01
APC	0	0	0	0.07	0.18	0	0.06
APLF	0	0	0	0	0	0	0.24
APLP2	0	0.13	0	0	0.01	0	0
APOL2	0	0	0	0	0.72	0	0
APP	0.21	0	0.17	0	0.11	0	0.21
APPL2	0	0.26	0	0	0	0	0
AR	0.3	0	0	0	0.26	0	0.04
ARAP1	0	0.09	0.03	0	0	0	0
ARAP2	0.36	0	0	0	0	0.5	0
ARAP3	0.08	0	0.27	0	0	0	0
ARF3	0	0	0.04	0	0	0	0.27
ARFGAP3	0.09	0.03	0	0	0	0	0
ARFGEF1	0	0	0	0.12	0	0	0
ARFGEF3	0	0	0	0	0	0	0
ARG2	0	0	0.22	0	0	0	0
ARHGAP1	0	0	0	0	0	0	0.03
ARHGAP12	0	0.05	0	0.28	0	0.05	0
ARHGAP18	0.02	0	0	0.35	0.33	0	0
ARHGAP20	0	0.04	0.05	0	0	0	0
ARHGAP21	0.08	0	0.08	0	0	0	0
ARHGAP22	0	0	0	0	0	0	0
ARHGAP23	0	0	0.16	0	0	0	0
ARHGAP24	0.08	0.48	0	0	0	0	0.3
ARHGAP25	0.2	0	0	0	0	0	0.74
ARHGAP26	0.13	0.13	0.23	0	0.17	0	0.04
ARHGAP29	0.58	0	0	0	0.79	0	0
ARHGAP31	0	0.13	0	0.98	0	0	0
ARHGAP35	0	0	0	0	0	0	0.16
ARHGAP36	0	0	0.37	0	0	0	0.43
ARHGAP4	0	0.16	0	0.36	0	0	0.31
ARHGAP40	0	0	0.45	0	0	0	0.47
ARHGAP42	0	0.83	0.02	0.37	0	0.18	0
ARHGAP44	0.07	0.11	0.17	0.07	0	0.07	0
ARHGAP45	0	0.51	0.49	0	0	0	0
ARHGAP5	0	0	0	0	0	0	0.1
ARHGAP6	0	0	0	0	0.06	0	0.42
ARHGEF10	0	0	0	0	0	0	0.5
ARHGEF10L	0	0	0	0	0	0.15	0
ARHGEF11	0	0	0	0.1	0	0	0
ARHGEF12	0	0	0	0	0	0	0
ARHGEF26	0.11	0	0.64	0	0	0	0
ARHGEF28	0	0	0.62	0	0	0	0
ARHGEF3	0	0	0	0.39	0.43	0.22	0
ARHGEF37	0	0.51	0.3	0	0	0	0
ARHGEF7	0	0	0	0	0	0.04	0
ARID1B	0.12	0	0.19	0	0	0	0.07
ARID2	0	0.07	0	0.13	0	0	0
ARID5B	0	0	0	0.43	0.09	0	0
ARL15	0	0.19	0	0	0.11	0.07	0
ARL2BP	0	0.13	0	0	0	0	0
ARL6	0	0	0	0	0	0	0
ARL6IP6	0	0	0.19	0	0	0	0
ARMC2	0	0	0	0	0	0.04	0
ARMC4	0	0.27	0.35	0	0	0	0.24
ARMC9	0	0	0	0	0	0	0
ARMH1	0.14	0	0	0	0	0	0.38
ARMH3	0	0	0	0.09	0	0.15	0
ARMH4	0.04	0	0	0	0	0.25	0
ARNT	0	0	0	0.14	0	0.04	0
ARNT2	0	0	0	0.24	0.01	0	0
ARNTL	0.08	0	0	0	0	0	0
ARNTL2	0	0.1	0	0	0	0	0
ARPC1B	0	0	0.02	0	0	0	0
ARPP21	0.44	0	0	0	0.03	0.27	0
ARRB1	0	0	0	0	0	0	0
ARRDC4	0	0	0	0.67	0	0	0.27
ARSD	0.08	0.41	0.06	0	0	0	0
ARSE	0	0.58	0	0.06	0	0.46	0
ARSG	0	0.56	0.11	0	0	0	0
ARSH	0	0.96	0.19	0	0	0	0
ASAH1	0	0	0	0.19	0	0.24	0
ASAP1	0	0.04	0	0.14	0	0	0
ASAP2	0.18	0	0	0	0	0	0.06
ASAP3	0	0	0	0	0	0.1	0.72
ASCC3	0	0.11	0	0	0	0	0
ASIC2	0.13	0	0	0.44	0	0	0.08
ASL	0	0.1	0	0	0	0	0
ASNS	0	0	0.23	0	0	0	0.05
ASPA	0	0	0	0.12	0.08	0	0.52
ASPG	0	0.4	0.6	0	0	0	0
ASPH	0	0.15	0	0	0	0	0
ASPHD1	0	0.17	0.09	0	0	0	0
ASTN1	0.12	0	0	0.07	0	0	0.09
ASTN2	0	0	0	0.46	0	0.52	0.09
ASXL3	0	0.22	0	0	0	0	0
ASZ1	0.21	0.89	0.12	0	0	0	0
ATAD2	0	0	0	0.02	0	0	0.57
ATAD2B	0	0	0	0	0	0	0
ATCAY	0	0	0	0	0	0	0
ATF7	0	0	0	0.09	0	0	0
ATF7IP	0	0.12	0	0	0	0	0
ATF7IP2	0	0	0	0.71	0	0.39	0
ATG13	0	0	0	0.15	0	0	0
ATG16L1	0	0.31	0.02	0	0	0	0
ATG7	0	0	0	0	0	0	0
ATL2	0	0	0	0	0	0	0.13
ATP10A	0	0	0	0	0.13	0	0.86
ATP11A	0	0	0.03	0	0	0	0
ATP11B	0	0	0	0	0	0	0
ATP11C	0.53	0	0	0.01	0	0.3	0
ATP12A	0	0	0	0.93	0	0	0
ATP13A3	0	0	0.04	0	0	0	0
ATP1A1	0	0	0	0	0	0.53	0
ATP1B1	0	0	0	0.14	0	0.29	0
ATP2B1	0	0	0.02	0	0.19	0	0
ATP2B2	0.08	0	0	0	0.01	0.2	0
ATP2B4	0	0	0	0	0.01	0	0.29
ATP2C1	0	0.17	0	0	0.06	0	0
ATP5PO	0	0	0	0	0	0	0
ATP6V0A1	0.18	0	0.15	0	0.1	0	0.1
ATP6V0D1	0	0.15	0	0	0	0	0
ATP6V1C2	0	0	0.6	0	0	0	0
ATP7A	0.15	0	0	0.05	0.11	0	0
ATP7B	0	0	0	0	0	0	0.23
ATP8A1	0.05	0.04	0.23	0	0	0	0
ATP8A2	0.16	0	0.1	0.13	0.07	0.19	0.18
ATP8B1	0	0.61	0	0	0	0	0.13
ATP8B2	0	0	0	0	0	0	0
ATP8B4	0	0.03	0	0	0.79	0	0
ATP9B	0	0.11	0	0	0	0	0
ATRNL1	0	0	0.08	0.25	0.27	0.17	0
ATRX	0	0	0.01	0.2	0	0.04	0
ATXN1	0.09	0	0	0	0	0	0
ATXN7L1	0.05	0.12	0	0	0	0.11	0
AUH	0	0.18	0.04	0	0	0	0
AUTS2	0	0	0	0	0	0.5	0
AVEN	0	0	0	0.03	0	0	0.45
AVPR1A	0	0.49	0.56	0	0	0	0
AZIN2	0	0.4	0.07	0	0	0	0
AZU1	0.35	0.28	0.14	0	0	0	0
B2M	0	0.08	0.03	0.53	0	0	0
B3GALNT2	0	0.01	0	0	0	0	0
B3GALT5	0.37	0	0.03	0	0	0	0
B3GAT2	0.29	0.06	0	0.86	0	0	0
B3GLCT	0	0.41	0.17	0	0	0	0.3
B3GNT7	0.73	0	0	0.09	0	0	0
B4GALNT3	0	0.19	0.31	0	0	0	0.26
B4GALNT4	0	0	0.05	0	0	0	0
B4GALT5	0	0	0	0	0	0	0
B4GAT1	0	0	0	0.03	0	0.17	0
BAALC	0.13	0	0	0	0.02	0	0
BABAM2	0	0	0.09	0	0	0	0.05
BACE2	0.59	0.28	0	0	0	0	0
BACH2	0	0.17	0.09	0	0	0	0
BAG3	0	0.73	0.57	0	0	0	0
BAHD1	0	0	0.15	0	0	0	0.22
BAIAP2	0	0	0	0	0	0	0.12
BANK1	0	0	0	0	0	0.09	0.22
BANP	0	0.16	0	0	0	0	0
BATF	0.57	0.3	0	0	0	0	0.2
BATF2	0	0.31	0.4	0	0	0	0
BAZ2B	0.05	0	0	0.19	0	0	0
BBS2	0	0.09	0.2	0	0	0	0
BBS7	0	0	0.04	0	0	0	0
BBS9	0	0.1	0	0	0	0	0
BCAM	0.54	0	0.6	0	0	0	0
BCAR3	0	0	0	0	0	0	0.65
BCAS3	0.02	0	0.09	0	0	0.04	0
BCAT1	0.16	0	0.28	0	0	0	0
BCL11A	0	0.59	0.67	0	0	0	0
BCL11B	0	0	0	0.69	0	0.98	0
BCL2	0.12	0.39	0	0	0.12	0.34	0
BCL2L1	0	0.02	0	0	0	0	0
BCL6	0	0	0.33	0	0	0	0
BCL9	0.1	0	0	0	0	0	0
BCLAF3	0	0.27	0.01	0	0	0	0
BCR	0	0	0	0	0	0	0.02
BDH2	0.27	0	0	0.15	0.12	0.36	0
BDNF	0	0.11	0.39	0	0.12	0	0
BEAN1	0.14	0	0.14	0	0	0	0.23
BEGAIN	0	0	0.17	0	0	0	0.19
BEND4	0	0	0	0.4	0	0.36	0.06
BEND5	0.17	0	0.21	0.24	0.19	0.21	0.23
BEND6	0	0.14	0	0	0	0	0
BEND7	0	0	0	0	0	0.03	0.29
BHLHE40	0	0	0	0	0.14	0.18	0.68
BICC1	0	0	0	0.12	0.02	0.36	0.17
BICD1	0.04	0	0.11	0	0	0.14	0
BIN1	0	0	0	0	0	0	0
BIRC2	0	0	0	0.19	0	0	0
BIRC3	0	0.63	0.33	0	0	0	0
BLCAP	0	0	0	0	0	0	0
BLM	0.04	0.42	0	0	0	0	0
BMERB1	0	0.18	0.09	0	0	0.02	0
BMP2	0	0	0	0	0.61	0	0
BMP3	0	0	0	0.39	0.33	0.73	0
BMP4	0	0.92	0.22	0	0	0	0
BMP6	0	0.91	0.17	0	0	0	0.12
BMP7	0.46	0	0	0	0.96	0	0
BMPER	0	0	0.3	0	0.66	0	0
BMPR1B	0.2	0	0	0	0	0	0.69
BMPR2	0.13	0	0.12	0	0	0	0.03
BMS1	0.06	0	0	0	0	0.08	0.15
BMT2	0	0	0	0.02	0	0	0
BNIP3L	0	0	0.16	0	0	0	0
BORCS5	0	0	0.01	0	0	0	0
BRAF	0	0.21	0	0.09	0	0	0
BRCA1	0.28	0	0	0	0	0.15	0.17
BRF1	0	0	0	0	0	0	0.14
BRINP1	0	0	0	0.51	0	0.3	0.41
BRINP2	0.65	0	0.01	0.4	0	0	0
BRINP3	0.35	0	0.38	0	0	0.17	0
BTBD1	0	0.07	0.04	0	0	0	0
BTBD11	0.06	0	0	0	0.14	0	0.54
BTBD16	0	0	0.73	0	0	0	0
BTBD17	0	0	0	0.15	0	0	0.14
BTBD3	0	0	0	0.16	0	0	0.32
BTBD9	0	0	0.16	0.04	0	0	0
BTG1	0	0	0	0	0.24	0	0.13
BTG2	0	0	0	0	0.29	0.43	0.31
BTN2A2	0	0.49	0.04	0	0	0	0
BTNL8	0	0	0	0	0	0.14	0.64
BVES	0	0.14	0	0	0	0	0.58
BZW2	0	0	0	0	0	0	0.16
C10H20orf194	0.14	0	0.07	0	0	0	0.07
C10orf107	0	0	0	0.5	0	0	0
C11H12orf29	0	0	0.18	0	0	0	0
C11H12orf40	0	0.54	0.19	0	0	0	0
C11H12orf56	0.33	0.22	0	0	0	0	0
C11H12orf66	0.1	0	0	0	0	0	0
C12H2orf80	0.06	0	0.3	0	0	0	0
C12orf42	0	0	0	0	0.07	0	0
C12orf5	0	0.3	0.09	0	0	0	0
C13H2orf15	0	0.21	0.23	0	0	0	0
C14H11orf49	0	0	0	0	0	0	0.07
C14H11orf87	0.11	0.65	0.25	0	0	0	0
C14orf179	0	0	0	0	0	0	0
C15H9orf24	0	0.4	0.11	0	0	0	0
C15orf41	0	0	0	0	0	0	0.12
C16orf7	0	0.05	0.07	0	0	0	0
C17orf79	0.17	0	0	0	0	0.06	0
C1GALT1	0	0.01	0.22	0	0	0	0
C1H1orf141	0.53	0.64	0	0	0.01	0	0
C1H1orf159	0	0.13	0.14	0	0	0	0
C1H1orf21	0.22	0.19	0.49	0	0	0.02	0
C1H1orf87	0	0	0	0.45	0	0.8	0.12
C1orf216	0.14	0	0	0	0	0	0.18
C1QL2	0.15	0.17	0	0	0	0.02	0.03
C1QTNF7	0.64	0	0	0	0.32	0	0
C1RL	0	0	0	0	0.66	0.32	0
C20H16orf54	0	0	0	0.06	0	0	0.71
C2CD3	0	0	0	0	0	0	0
C2CD5	0	0.16	0.13	0	0	0	0
C2H3orf70	0	0	0.12	0	0	0.06	0
C2orf50	0	0	0	0.38	0.5	0.4	0
C2orf91	0	0	0	0.99	0	0	0
C3H21orf62	0.67	0	0	0	0.02	0	0.22
C3H21orf91	0	0.35	0.15	0	0	0.3	0
C3H7orf50	0	0	0	0	0	0	0
C3H7orf57	0	0	0	0.03	0.39	0.45	0
C3orf67	0	0	0.13	0	0	0	0.36
C4H6orf132	0	0	0.6	0	0	0.43	0
C4H6orf141	0	0	0	0	0.99	0.13	0
C5H4orf27	0	0.19	0.1	0	0	0	0
C5H4orf45	0	0.17	0	0	0	0	0.23
C5orf58	0	0	0.08	0.84	0	0	0
C6	0.05	0	0	0	0.11	0	0.08
C6H5orf30	0	0	0	0	0	0	0.4
C7H14orf39	0	0	0	0.65	0	0.95	0
C8H8orf34	0.68	0	0	0	0	0	0.02
C8H8orf88	0.18	0	0	0	0	0.45	0
CA10	0.14	0	0	0	0.19	0	0.2
CA11	0.07	0	0.01	0	0	0	0
CA2	0	0.23	0.59	0	0	0	0
CA3	0	0.69	0.64	0	0	0	0
CA4	0.15	0.77	0.38	0	0	0	0
CA8	0	0	0	0	0	0	0.63
CAB39	0	0	0	0	0	0	0
CABIN1	0	0	0	0	0	0	0
CABLES1	0	0.3	0.31	0	0	0	0
CABP1	0	0	0.33	0	0	0	0
CABYR	0	0	0.25	0	0	0	0.05
CACHD1	0	0	0.18	0.51	0.11	0	0
CACNA1A	0.17	0	0.05	0	0.25	0.09	0.08
CACNA1B	0.14	0.16	0.18	0	0	0	0.19
CACNA1C	0.19	0	0	0.03	0.14	0.2	0.23
CACNA1D	0.04	0.01	0.06	0	0	0	0
CACNA1E	0	0.07	0.01	0	0	0	0.3
CACNA1F	0	0.42	0.43	0	0	0	0
CACNA1G	0.06	0.3	0.57	0.22	0	0	0
CACNA1I	0	0	0.11	0.07	0	0	0
CACNA2D1	0.16	0	0	0.27	0.22	0.16	0.21
CACNA2D2	0	0	0.09	0	0	0.25	0
CACNA2D3	0	0	0	0.59	0.34	0.75	0
CACNB2	0.03	0	0	0.2	0.21	0.19	0.18
CACNB3	0.06	0	0	0	0	0.06	0
CACNB4	0	0	0.2	0	0	0	0
CACNG2	0	0	0.13	0	0	0	0
CACNG3	0	0	0.59	0	0	0.08	0.05
CACNG8	0	0.01	0	0	0	0	0
CADM1	0.04	0.23	0.14	0.06	0	0	0.15
CADM2	0.12	0	0.14	0.17	0.22	0.21	0.21
CADM4	0.38	0	0.06	0	0	0	0
CADPS2	0.12	0	0	0.09	0.41	0	0.19
CALB1	0.2	0.73	0.08	0	0	0	0
CALB2	0.34	0	0	0	0.2	0	0.41
CALCOCO2	0	0	0	0.02	0	0	0
CALCR	0.88	0	0.5	0	0	0	0
CALCRL	0	0	0	0.19	0	0.58	0.41
CALD1	0.01	0.53	0.42	0	0	0	0
CALHM2	0	0	0.62	0.02	0	0	0
CALHM3	0	0.49	0.15	0	0	0	0
CALN1	0.04	0.22	0.21	0.11	0.12	0.13	0
CALY	0.02	0	0	0.02	0.06	0.1	0
CAMK1D	0	0.07	0.14	0	0.1	0	0
CAMK1G	0	0.03	0	0	0	0	0.19
CAMK2A	0	0	0	0	0	0.12	0.04
CAMK2G	0	0	0.08	0	0	0	0
CAMK2N1	0.03	0	0.1	0	0	0	0
CAMK4	0	0.18	0	0	0.54	0.04	0
CAMKMT	0	0	0	0	0	0	0.11
CAMTA1	0.19	0	0.23	0.05	0.02	0.12	0.24
CAMTA2	0	0	0.02	0	0	0	0
CAP2	0	0	0	0	0.08	0	0
CAPN1	0	0	0.24	0	0	0	0
CAPN12	0	0.15	0.62	0	0	0	0
CAPN14	0	0	0.48	0	0	0	0
CAPN2	0	0	0	0.12	0	0	0.02
CAPN3	0	0.23	0.12	0	0	0	0
CAPN9	0	0.2	0.32	0	0	0	0
CARHSP1	0	0.43	0.17	0.21	0	0	0
CARMIL1	0	0.19	0.09	0	0	0	0
CARMIL2	0	0.39	0.24	0	0	0	0
CARMIL3	0	0	0	0	0	0	0.18
CARS1	0	0	0.06	0	0	0	0
CARTPT	0	0	0.03	0.95	0	0	0
CASC1	0	0	0	0.2	0	0	0
CASK	0.01	0.11	0	0	0	0.03	0.12
CASP3	0	0	0	0	0.17	0	0
CASP6	0	0	0.06	0	0	0	0
CASP8	0	0	0.18	0	0.07	0	0
CAST	0	0	0	0.14	0.17	0.43	0
CATSPERE	0	0.11	0	0	0	0	0
CATSPERG	0	0	0.26	0	0	0	0.22
CBFA2T2	0	0	0	0	0	0.12	0
CBFB	0	0	0	0	0.26	0	0
CBLB	0	0	0	0.13	0	0	0
CBLN1	0	0.03	0.24	0	0	0.07	0.32
CBLN2	0	0	0	0	0	0.81	0
CBLN4	0	0	0.9	0.01	0	0	0
CBR1	0.03	0	0.25	0	0	0	0
CBX3	0	0	0	0	0	0	0
CC2D1A	0	0	0.21	0	0	0	0
CCBE1	0	0	0	0.2	0.48	0	0.63
CCDC107	0	0.22	0.03	0	0	0	0
CCDC134	0	0.75	0	0	0.09	0	0
CCDC136	0.03	0	0	0	0	0	0
CCDC146	0	0	0	0.21	0	0.2	0.18
CCDC148	0	0	0	0	0.03	0	0
CCDC157	0	0.03	0.13	0	0	0	0
CCDC171	0	0.01	0	0.41	0	0.11	0
CCDC187	0	0.24	0.5	0	0	0	0.39
CCDC192	0.04	0.06	0	0.7	0	0.03	0
CCDC198	0	0	0	0	0	0	0.74
CCDC24	0.04	0	0.24	0	0	0	0
CCDC3	0	0.45	0	0	0	0	0.23
CCDC33	0	0.57	0.43	0	0	0	0
CCDC39	0	0	0	0	0	0.29	0
CCDC6	0	0.1	0.05	0	0	0	0
CCDC60	0	0.71	0.36	0	0	0	0
CCDC65	0.01	0	0.16	0	0	0	0.37
CCDC7	0	0.11	0.05	0	0	0	0
CCDC77	0	0.24	0.25	0	0	0	0
CCDC85A	0	0	0	0	0	0.02	0.47
CCDC85C	0	0	0.45	0	0	0	0
CCDC88A	0.15	0	0.08	0.01	0	0	0.03
CCDC88B	0.19	0.47	0.19	0	0	0	0
CCDC91	0	0	0	0.13	0	0.13	0
CCDC92	0	0.05	0	0	0	0	0
CCDC93	0	0	0	0.22	0	0	0
CCKBR	0.53	0.28	0.21	0	0	0	0
CCL25	0	0.07	0.16	0.02	0	0	0
CCM2	0	0	0	0	0	0.09	0.05
CCN2	0	0	0	0	0.51	0.36	0.47
CCNC	0	0	0	0.16	0	0	0
CCND3	0	0.16	0.14	0	0	0	0
CCNI	0	0	0	0	0	0	0
CCNJL	0	0	0	0.37	0	0	0.16
CCS	0	0.06	0.11	0	0	0	0
CCSER1	0.2	0.08	0.25	0.21	0.12	0.12	0.17
CCSER2	0	0.06	0.07	0	0	0	0
CCT6B	0	0	0	0	0	0.1	0
CD163	0	0.33	0.12	0.25	0	0.14	0
CD163L1	0	0.18	0	0.08	0	0	0
CD247	0	0.04	0.33	0	0	0	0
CD276	0	0.26	0.07	0	0	0	0
CD2AP	0.14	0	0	0	0	0	0.02
CD36	0	0	0	0	0	0.17	0.81
CD40	0	0.11	0.12	0.28	0.23	0.1	0
CD46	0	0.14	0	0	0.03	0	0
CD47	0	0.04	0.05	0	0	0	0
CD58	0	0.02	0.04	0	0	0	0.07
CD6	0.35	0	0.19	0	0	0	0.59
CD70	0	0.84	0.1	0	0	0	0
CD81	0	0	0	0.19	0	0	0
CD86	0	0	0	0	0.8	0.08	0
CD96	0	0.55	0.64	0	0	0	0
CDAN1	0.1	0	0.17	0	0	0	0
CDC14B	0	0.3	0	0	0.35	0	0
CDC25B	0	0	0	0.71	0	0	0
CDC42BPA	0.14	0	0.16	0.16	0	0.05	0.16
CDC42EP3	0	0	0	0	0.12	0	0
CDH10	0	0	0	0.57	0.56	0.72	0
CDH11	0.57	0	0	0	0	0.89	0
CDH12	0	0	0	0.88	0	0	0.24
CDH13	0	0	0	0.19	0.26	0	0.32
CDH18	0.1	0	0	0.22	0	0.23	0.15
CDH2	0.2	0	0	0	0	0.12	0
CDH20	0	0	0	0.58	0.15	0	0.05
CDH22	0	0	0	0	0.13	0	0.07
CDH23	0.67	0	0.21	0	0.22	0	0
CDH4	0	0.4	0.36	0	0	0	0.42
CDH5	0.12	0.84	0.39	0	0	0	0
CDH6	0.08	0	0	0.81	0.27	0	0
CDH7	0.55	0	0	0	0	0	0
CDH8	0	0	0.6	0	0	0.48	0
CDH9	0	0	0	0.54	0.62	0.85	0.11
CDHR3	0	0.81	0.18	0	0	0	0
CDK14	0	0	0	0.21	0.18	0.13	0
CDK16	0.03	0	0	0	0	0.02	0.06
CDK17	0	0	0	0	0	0	0.02
CDK18	0.16	0	0.56	0	0	0	0
CDK19	0	0	0	0.01	0	0	0.33
CDK5R1	0	0	0	0	0.01	0.01	0
CDK5RAP2	0	0	0.04	0	0	0	0
CDK5RAP3	0.07	0.16	0.16	0	0	0	0
CDK6	0.17	0	0.12	0	0	0.09	0.6
CDKAL1	0	0	0	0.2	0.15	0.3	0
CDKL1	0	0	0.3	0	0	0	0.22
CDKN2B	0.75	0	0	0	0	0	0
CDON	0	0	0.16	0	0	0	0
CDR2	0.1	0.42	0.16	0	0	0	0
CDS1	0	0	0.07	0	0	0	0
CDT1	0.37	0	0.14	0.05	0.18	0	0
CDYL	0	0	0	0	0	0	0.04
CDYL2	0	0	0	0	0	0	0.35
CECR2	0	0.48	0.35	0	0	0	0
CELF2	0.2	0	0	0	0.23	0	0.21
CELF4	0.14	0	0	0	0	0.1	0.1
CELF6	0	0.09	0	0.02	0	0	0
CELSR1	0.57	0	0	0	0	0.27	0.07
CEMIP	0	0	0	0	0.59	0.12	0
CEMIP2	0.22	0	0.17	0	0.07	0	0
CENPC	0	0	0	0.59	0	0.25	0
CENPI	0	0.67	0.32	0	0	0	0
CENPP	0	0.33	0.28	0	0	0	0
CENPW	0	0	0.37	0	0.53	0	0
CEP104	0	0	0	0	0	0	0
CEP112	0	0	0	0.2	0.18	0.19	0.05
CEP128	0	0.05	0.01	0.13	0.43	0	0
CEP170	0	0.04	0.05	0	0	0	0
CEP44	0	0.1	0	0	0	0	0
CEP70	0	0	0.34	0	0	0	0
CEP72	0	0.2	0.39	0	0	0	0
CEP83	0	0	0	0.05	0.06	0.34	0
CEP85L	0	0	0	0.15	0.21	0	0
CEP89	0	0.08	0.03	0	0	0	0
CERK	0.14	0	0	0	0	0	0
CERKL	0	0.04	0	0.42	0.28	0	0
CERS4	0	0	0	0	0	0	0
CERS6	0	0.19	0.01	0	0.07	0.15	0
CFAP100	0	0.01	0.52	0	0.04	0	0
CFAP299	0	0	0	0	0	0.18	0
CFAP43	0	0	0	0	0	0.2	0.14
CFAP54	0	0	0	0.28	0	0.34	0
CFAP57	0	0.42	0.34	0	0	0	0
CFAP58	0	0	0	0	0.63	0.01	0
CFAP61	0	0.23	0.02	0.01	0	0	0
CFAP69	0	0	0	0	0.17	0	0
CFAP70	0	0	0	0	0	0	0.06
CFAP73	0	0	0.14	0	0	0	0.51
CFAP77	0	0	0	0	0	0	0.53
CFLAR	0	0	0	0.09	0.15	0	0.44
CFTR	0.62	0.19	0.17	0	0	0	0
CGNL1	0.73	0	0	0	0	0	0.57
CHAT	0	0.57	0.66	0	0	0	0
CHCHD10	0	0	0.16	0	0	0	0
CHD3	0	0.1	0.16	0	0	0	0
CHD4	0.09	0	0	0	0	0	0.04
CHD6	0.06	0	0	0	0.14	0.05	0
CHD7	0	0	0	0.25	0.9	0	0
CHD9	0.09	0	0	0.18	0.18	0.15	0.02
CHFR	0	0	0.02	0	0	0	0
CHGA	0	0.5	0.11	0	0	0.02	0
CHGB	0	0	0	0.08	0.31	0	0
CHKA	0	0	0	0	0	0	0
CHL1	0.16	0.46	0	0	0.17	0	0
CHM	0	0	0	0.11	0	0	0
CHN1	0	0	0	0.15	0.14	0.1	0
CHN2	0	0	0	0.35	0.64	0	0.02
CHODL	0	0	0	0	0.24	0.8	0
CHP1	0	0.1	0	0	0	0	0
CHRM3	0.01	0.55	0	0	0.07	0	0
CHRM5	0	0	0	0.3	0	0	0.49
CHRNA7	0	0.54	0.01	0	0	0	0.12
CHRNB3	0	0	0	0.04	0	0	0.73
CHST1	0	0	0.05	0	0	0	0.16
CHST11	0	0.45	0.25	0	0	0.02	0
CHST12	0.03	0	0.05	0	0	0.07	0
CHST15	0	0.34	0.17	0.41	0	0.36	0
CHST2	0.56	0	0	0	0.11	0	0
CHST8	0	0	0	0	0	0	0.68
CHST9	0.71	0	0	0	0.23	0.05	0
CHSY1	0	0	0	0	0	0	0.15
CHSY3	0	0.08	0	0	0	0	0.2
CIT	0	0	0	0	0	0	0
CITED1	0	0	0	0.06	0.1	0	0
CKB	0	0	0	0.29	0	0	0
CKMT2	0	0	0	0.06	0	0	0.26
CLASP1	0.15	0.07	0.11	0.1	0	0.03	0
CLCN4	0	0	0	0	0	0	0
CLDN11	0	0.22	0.34	0	0	0	0
CLDN16	0	0.21	0.43	0	0.25	0	0
CLDN3	0	0.08	0	0	0.65	0	0
CLEC4G	0	0.91	0.31	0	0	0	0
CLIC2	0	0.03	0	0.78	0	0	0
CLIC5	0.38	0	0	0	0.11	0	0
CLIP1	0	0	0	0	0	0	0
CLIP2	0	0	0	0	0	0	0
CLIP4	0	0	0	0	0	0	0
CLMN	0	0.83	0.09	0	0	0	0.15
CLMP	0	0	0	0	0.57	0	0.59
CLPB	0	0.07	0.17	0	0	0	0
CLRN1	0	0	0	0	0	0	0.75
CLSTN2	0.02	0.1	0.04	0.13	0	0	0
CLTCL1	0	0	0.47	0	0	0	0.02
CLU	0	0	0	0.18	0.19	0	0
CLVS1	0	0	0	0.08	0	0	0
CLYBL	0.26	0	0	0	0	0	0.25
CMIP	0	0	0.12	0.1	0	0	0.09
CMSS1	0	0	0	0.12	0	0	0
CMTM2	0	0	0	0	0	0	0.27
CMTM7	0.23	0.25	0.1	0	0.15	0	0
CMTM8	0.3	0.42	0.32	0	0.18	0	0
CMYA5	0	0	0.23	0	0	0	0.62
CNBD1	0	0	0	0	0	0	0.63
CNIH3	0.47	0.1	0.15	0	0	0	0
CNKSR2	0.05	0	0	0	0	0	0
CNKSR3	0	0	0	0.86	0	0.63	0
CNN3	0	0.06	0.05	0	0	0	0
CNNM1	0	0	0.03	0	0	0	0
CNOT4	0.21	0	0	0	0	0	0
CNOT6L	0	0	0	0	0	0	0
CNR1	0	0	0	0	0	0.17	0.25
CNTFR	0.05	0	0.06	0	0	0	0
CNTLN	0	0	0	0	0	0.12	0.15
CNTN1	0.08	0	0	0.18	0	0.06	0.02
CNTN2	0	0.06	0.1	0	0	0	0
CNTN3	0	0	0	0.42	0.54	0	0
CNTN4	0.05	0	0.47	0	0	0	0
CNTN5	0.12	0	0	0	0	0.2	0.84
CNTN6	0	0	0.03	0.32	0	0	0
CNTNAP1	0	0	0	0	0	0	0
CNTNAP2	0.11	0	0	0.25	0.19	0.25	0.24
CNTNAP4	0.74	0	0.16	0	0	0	0
CNTNAP5	0	0.27	0	0.19	0.22	0.24	0
CNTRL	0	0.07	0.31	0	0	0	0
COA1	0	0	0	0	0	0	0
COBL	0	0	0	0	0.6	0	0.46
COBLL1	0	0	0	0.8	0	0	0.26
COCH	0.07	0.5	0.13	0	0	0	0
COG5	0	0	0	0	0	0.09	0
COG6	0	0	0	0	0	0	0
COL11A1	0	0	0	0.6	0.56	0.41	0
COL12A1	0	0	0	0	0.12	0.86	0
COL14A1	0	0	0	0.59	0.69	0.34	0.15
COL16A1	0.34	0	0	0	0.54	0	0
COL18A1	0.22	0	0.72	0	0	0	0
COL19A1	0.45	0	0	0	0	0.28	0
COL20A1	0	0.66	0.2	0	0	0	0
COL21A1	0.8	0	0	0	0.39	0	0
COL23A1	0	0.79	0.46	0	0.35	0	0
COL24A1	0	0	0.39	0	0.66	0	0
COL25A1	0.46	0.57	0.25	0	0	0	0
COL26A1	0.61	0	0	0	0.02	0	0
COL4A1	0.09	0	0	0	0	0	0.41
COL4A2	0	0	0	0	0.11	0	0.31
COL4A4	0.7	0	0	0.23	0	0	0
COL4A5	0	0.5	0.31	0	0	0	0
COL5A3	0.09	0.38	0.38	0	0	0	0
COL6A2	0	0.82	0.6	0	0	0	0
COL6A5	0	0.97	0	0	0	0	0
COL8A1	0.22	0	0	0	0.02	0.67	0
COL9A1	0.35	0.07	0	0	0	0	0
COL9A2	0	0	0.73	0	0	0.38	0
COLGALT2	0.63	0	0	0	0	0.05	0
COP1	0	0.11	0	0.04	0.02	0.03	0
COPG	0	0.07	0.04	0	0	0	0
COPG2	0.13	0.04	0	0	0.01	0	0
COPS6	0	0.02	0.1	0	0	0	0
COQ10A	0	0	0.16	0	0	0	0
COQ8B	0	0	0.22	0	0	0	0
CORO1C	0	0	0.01	0.12	0	0	0
CORO2A	0	0	0.24	0	0	0	0
CORO2B	0	0	0	0	0	0.03	0.05
CORO6	0	0	0.2	0	0	0	0
COTL1	0	0.15	0	0	0.07	0	0
CPAMD8	0	0	0	0.97	0	0	0.26
CPD	0	0.08	0	0	0	0.07	0
CPE	0	0	0	0	0.06	0.1	0
CPEB1	0	0	0	0	0	0	0.04
CPEB2	0	0.12	0.07	0	0	0	0
CPEB3	0.03	0	0	0.21	0	0.07	0
CPEB4	0	0	0	0.07	0	0	0.04
CPLANE1	0	0.12	0.13	0	0	0	0
CPLX1	0.53	0	0	0.06	0	0	0
CPNE4	0	0	0	0	0	0	0.88
CPNE5	0	0	0	0.25	0	0	0.22
CPNE7	0.21	0.57	0.54	0	0	0	0
CPNE8	0.49	0	0	0	0	0.09	0.51
CPNE9	0	0	0.62	0	0	0	0
CPPED1	0.03	0	0	0	0	0.4	0.18
CPQ	0	0.11	0	0	0	0	0
CPT1A	0	0.22	0.23	0	0	0	0.25
CPZ	0.63	0.08	0.4	0	0	0	0
CR1	0.11	0.37	0.09	0	0.1	0	0
CR1L	0	0.49	0.02	0	0	0	0
CR2	0.47	0.42	0	0	0	0	0
CRADD	0	0	0	0.36	0	0	0
CRB1	0	0	0	0.89	0	0	0
CREB3L1	0.15	0.85	0.44	0	0	0	0
CREB3L2	0	0.14	0.43	0	0	0	0
CREB5	0.16	0	0	0.7	0	0	0
CREG2	0.06	0	0	0	0	0	0.02
CRHBP	0	0.93	0.27	0	0	0	0
CRHR1	0	0.22	0.74	0	0	0	0
CRHR2	0	0	0.12	0	0.18	0	0.71
CRIM1	0	0	0.27	0	0	0	0
CRIP2	0	0	0	0	0	0	0.28
CRISP3	0	0	0	0	0.98	0	0
CRISPLD1	0.69	0	0	0	0	0	0.4
CRMP1	0	0	0	0	0	0	0
CROCC	0	0	0	0	0.06	0	0.43
CROCC2	0	0	0	0.12	0	0	0.56
CROT	0	0	0	0	0	0.05	0.53
CRPPA	0	0	0	0	0.02	0	0.08
CRTAC1	0	0	0.15	0.27	0	0.04	0
CRY1	0	0	0	0	0.25	0	0
CRY2	0.17	0	0	0	0	0	0
CRYBB3	0	0	0.66	0.01	0	0	0
CRYL1	0	0.2	0.03	0	0	0	0
CRYM	0	0	0	0	0	0.49	0.67
CRYZ	0	0	0	0.05	0.04	0	0
CS	0	0	0	0	0	0	0
CSAD	0	0.29	0.22	0	0	0	0
CSDC2	0.27	0	0.12	0	0	0	0
CSDE1	0	0.36	0	0	0	0	0
CSGALNACT1	0.65	0	0.07	0	0	0	0
CSMD1	0.22	0.2	0.12	0.22	0.25	0.24	0.21
CSMD2	0.11	0	0.18	0.07	0.22	0	0.2
CSMD3	0.18	0	0.23	0	0.13	0.21	0.23
CSRNP1	0	0.07	0	0	0.58	0	0
CSRNP3	0	0	0	0	0.07	0	0.11
CSRP2	0	0	0.09	0.22	0	0.46	0
CST3	0	0	0	0	0	0	0
CTBP1	0	0	0	0	0	0	0.02
CTBP2	0	0	0	0.45	0.33	0.31	0.24
CTDSPL	0	0	0	0	0.09	0	0
CTHRC1	0	0.45	0.36	0	0	0	0
CTNNA2	0.24	0.1	0.22	0.22	0.15	0.08	0.21
CTNNA3	0	0.01	0.28	0	0	0	0
CTNNAL1	0	0	0	0	0.24	0	0.08
CTNND2	0	0	0.22	0.18	0	0.21	0.22
CTPS2	0	0	0	0.36	0	0.06	0.05
CTSC	0	0	0	0.3	0	0	0.4
CTSD	0.13	0	0	0.17	0	0	0
CTSL	0	0	0	0.2	0	0	0
CTSO	0.01	0.12	0.11	0.06	0	0	0
CTSV	0	0	0	0.42	0.72	0.07	0.11
CTTN	0.03	0	0	0	0	0	0
CTTNBP2	0	0	0	0	0	0	0.03
CUL4A	0	0	0	0	0	0	0
CUTC	0	0	0.53	0	0	0	0
CUX1	0.13	0	0.09	0	0	0	0.13
CUX2	0	0	0	0.65	0.18	0.08	0
CWC27	0	0	0	0.1	0	0.32	0
CWH43	0.18	0.89	0	0	0	0	0
CXADR	0	0	0	0	0	0	0
CXCL17	0	0	0.47	0	0	0	0
CXXC4	0.19	0	0	0	0	0	0.3
CXXC5	0.04	0	0	0	0	0	0.43
CYB561	0	0	0	0	0	0.02	0.29
CYB5B	0	0.05	0	0	0	0	0
CYB5D2	0	0.04	0.22	0	0	0	0
CYB5R4	0	0	0.11	0	0	0	0
CYBA	0	0	0.25	0.19	0	0.84	0
CYFIP1	0	0.5	0.64	0	0	0	0
CYGB	0	0.06	0.17	0.63	0	0.07	0
CYLD	0	0	0	0.01	0	0	0.1
CYP19A1	0	0.45	0	0	0	0	0.6
CYP26A1	0	0.17	0.74	0	0	0	0
CYP27A1	0	0.35	0.08	0	0.18	0	0
CYP2A26	0	0.35	0.27	0	0	0	0
CYP2C18	0	0.25	0.35	0	0	0	0.03
CYP2C76	0	0.05	0.29	0	0	0	0
CYP2C8	0	0.36	0.37	0	0	0	0.16
CYP39A1	0	0	0	0.21	0.39	0	0
CYP46A1	0	0	0	0	0	0	0
CYP7B1	0	0	0	0	0.03	0.14	0
CYTH1	0	0	0	0	0	0	0
CYTH3	0	0.09	0	0	0	0	0
CYTIP	0	0	0	0	0.6	0	0.62
CYTL1	0.12	0.75	0.53	0	0	0	0
CYYR1	0	0	0	0	0.05	0	0
DAAM1	0	0	0	0	0.19	0	0
DAB1	0.17	0	0.11	0.15	0	0.17	0
DAB2	0.49	0	0.21	0	0	0	0
DAB2IP	0	0	0.26	0.04	0	0	0
DACH1	0.05	0	0	0.81	0.57	0	0
DACH2	0.02	0.42	0	0	0	0	0
DACT1	0	0	0.67	0.3	0	0	0
DACT3	0.09	0	0	0	0	0	0
DAGLA	0	0	0.22	0	0	0	0
DAP3	0	0.1	0	0	0	0	0
DAPK1	0	0	0	0	0	0	0.43
DARS1	0	0.12	0.03	0	0	0	0
DBN1	0	0.03	0	0	0	0	0
DCAF6	0	0	0	0	0	0	0
DCBLD1	0	0	0	0	0	0	0.3
DCBLD2	0.27	0	0	0	0.07	0	0
DCC	0	0.31	0	0.58	0.23	0.49	0
DCDC1	0	0	0	0	0	0.07	0.08
DCDC2	0.65	0	0	0	0.41	0	0
DCDC2C	0.21	0.41	0.66	0	0	0	0
DCHS2	0	0	0	0.64	0	0.57	0
DCLK1	0.21	0	0.22	0	0.14	0.02	0.15
DCLK2	0.01	0	0	0.15	0.16	0.07	0
DCLK3	0.34	0	0.19	0	0	0	0.04
DCUN1D2	0	0	0	0	0	0	0
DCUN1D3	0	0	0	0	0	0	0.27
DCX	0	0	0	0	0	0	0
DDAH1	0	0	0	0.41	0	0	0.15
DDAH2	0	0	0	0.36	0	0.78	0
DDHD1	0	0.12	0.04	0	0	0	0
DDN	0	0	0	0.2	0	0	0.48
DDX10	0	0	0.03	0	0	0	0
DDX17	0	0	0	0	0.02	0.11	0
DDX4	0	0.51	0.07	0	0	0	0.07
DDX60	0	0	0	0.28	0.77	0	0
DDX60L	0	0	0	0	0.6	0.32	0
DECR1	0	0	0	0.35	0	0	0.04
DECR2	0	0	0.09	0	0	0	0
DEF6	0	0.3	0.4	0	0	0	0
DENND11	0	0.1	0.06	0	0	0	0
DENND1A	0	0	0	0.17	0.12	0	0.12
DENND1B	0	0	0	0.22	0	0.05	0
DENND2A	0.1	0	0	0.25	0.09	0	0
DENND2B	0	0	0	0.02	0.16	0	0
DENND3	0	0.01	0.31	0	0	0	0
DENND4A	0	0	0	0	0	0	0
DENND4C	0	0	0	0	0	0.07	0
DENND5A	0	0	0	0	0	0.19	0
DENND5B	0	0	0	0.11	0.1	0.03	0
DEPDC1B	0	0.66	0.2	0	0	0	0.1
DEPTOR	0	0	0.02	0.33	0.04	0	0.02
DERA	0	0	0	0.07	0.08	0	0.47
DERL3	0	0.51	0.08	0.01	0	0	0.05
DESI2	0	0.27	0.09	0	0	0	0
DEUP1	0	0	0	0	0	0	0.1
DGKB	0	0	0	0.07	0.33	0	0.41
DGKD	0	0	0	0.41	0.3	0	0
DGKG	0	0	0	0	0	0	0.21
DGKH	0	0	0	0	0	0.2	0.25
DGKI	0.03	0	0.31	0	0	0	0
DGKK	0	0	0.33	0	0	0	0.56
DGKZ	0.16	0	0	0	0	0	0.05
DGLUCY	0	0.02	0	0	0	0	0
DHDH	0	0.36	0.24	0	0	0	0
DHRS11	0	0.68	0.23	0	0	0	0
DHRS2	0	0	0.74	0	0	0	0
DHRS3	0	0.04	0.66	0	0	0	0.39
DHRS4	0	0	0.17	0	0	0	0.19
DHRS7B	0	0	0.08	0	0	0	0
DHX30	0	0	0	0	0	0	0
DHX58	0.33	0.06	0.34	0	0	0	0
DIAPH2	0	0	0	0	0	0.38	0.59
DIAPH3	0	0	0	0	0	0	0.3
DIP2B	0.08	0	0.01	0	0	0	0
DIP2C	0	0.08	0.07	0	0	0	0
DIPK2A	0	0	0	0.16	0.22	0	0
DIRAS2	0	0	0.19	0	0	0	0.23
DIRAS3	0	0	0.09	0.45	0.05	0	0
DIS3L	0	0	0	0	0	0	0.21
DIS3L2	0	0	0	0.03	0	0.08	0
DISC1	0	0.35	0	0	0	0	0.42
DISP1	0.27	0	0	0	0	0	0
DISP3	0	0	0	0.13	0.24	0	0.6
DKK1	0.19	0.51	0.62	0	0	0	0
DKK2	0	0.71	0	0	0	0.41	0
DKK3	0	0	0	0	0	0	0
DLC1	0	0.18	0.32	0	0	0	0
DLG1	0.06	0	0	0	0	0	0
DLG2	0.24	0	0.25	0	0.22	0.24	0.25
DLG4	0	0	0	0	0	0	0
DLG5	0	0	0	0	0	0	0.08
DLGAP1	0.17	0	0	0.1	0.18	0	0.2
DLGAP2	0	0	0.16	0	0.14	0.07	0.24
DLGAP3	0.02	0	0	0	0	0	0.03
DLGAP4	0	0	0.02	0	0	0	0
DLK1	0.01	0	0.33	0	0.05	0	0.52
DMAC1	0.11	0	0	0	0.23	0	0
DMD	0	0	0	0.12	0.07	0.33	0.1
DMPK	0	0	0.03	0	0	0	0
DNA2	0	0	0.01	0	0	0	0
DNAAF4	0	0	0	0	0	0	0
DNAH1	0.25	0	0.24	0	0.15	0	0
DNAH10	0	0.03	0.21	0	0	0	0
DNAH3	0	0	0.16	0	0	0	0.81
DNAH6	0	0	0	0	0	0.12	0
DNAH8	0	0.8	0.2	0	0	0	0
DNAH9	0	0.14	0	0	0	0	0.52
DNAJB13	0	0.25	0.33	0	0	0	0
DNAJC15	0.06	0	0	0	0	0	0
DNAJC3	0	0.23	0.02	0	0	0	0
DNAJC6	0.01	0	0	0	0	0	0.08
DNER	0.4	0	0	0	0	0	0
DNM1	0.15	0	0.15	0	0	0	0
DNM3	0.17	0	0	0.23	0.08	0.24	0.17
DNMBP	0	0	0.02	0.4	0	0	0
DNMT3A	0	0	0	0	0	0	0
DOCK1	0	0.56	0.2	0	0	0	0
DOCK10	0	0.5	0.03	0	0	0	0.06
DOCK11	0.37	0	0	0	0	0.59	0
DOCK2	0	0.53	0.43	0	0	0	0.02
DOCK3	0.22	0.19	0.24	0.12	0.08	0.17	0.22
DOCK4	0	0	0.04	0.29	0	0.16	0
DOCK5	0	0	0	0	0	0	0.75
DOCK6	0	0.56	0.2	0.06	0	0	0
DOCK7	0	0	0	0.22	0	0.13	0
DOCK9	0	0.12	0	0	0	0	0
DOK5	0	0	0.04	0	0.28	0	0
DOK6	0	0	0	0	0	0.36	0.19
DOK7	0.72	0	0	0	0	0.29	0
DOP1B	0.02	0.24	0.28	0	0	0	0
DPF1	0	0	0	0	0	0	0.09
DPF3	0	0	0	0	0.89	0	0.37
DPH6	0	0	0	0.09	0	0.12	0
DPP10	0.19	0	0.2	0	0	0	0.12
DPP4	0	0	0.41	0	0	0.63	0
DPP6	0.05	0	0.07	0.28	0.03	0.22	0.1
DPY19L2	0	0	0	0	0.35	0	0.1
DPYD	0	0.21	0.22	0	0	0.13	0.17
DPYS	0.65	0	0	0	0	0.14	0
DPYSL2	0.09	0	0	0	0	0.15	0.14
DPYSL3	0.24	0.21	0.09	0	0	0	0
DPYSL4	0	0	0.13	0	0	0.2	0
DPYSL5	0	0.08	0	0	0	0	0
DRAM1	0.52	0	0	0	0.52	0	0
DRD2	0	0	0	0.13	0.62	0	0.31
DRD3	0.72	0	0.42	0	0.09	0	0
DSC2	0	0	0	0.18	0	0.87	0
DSCAM	0.25	0	0.23	0	0.22	0.21	0.24
DSCAML1	0	0.46	0.61	0.6	0	0.38	0
DSEL	0.35	0	0	0	0	0.38	0.01
DST	0.21	0.03	0.18	0	0.1	0	0.21
DTD1	0	0	0	0	0	0	0
DTNA	0	0.03	0.24	0	0	0.08	0
DTNB	0.17	0	0	0	0	0	0
DUOX1	0	0.31	0.29	0.13	0.08	0	0
DUSP10	0	0	0	0	0	0.74	0
DUSP16	0	0	0	0.41	0	0	0
DUSP22	0	0	0.28	0	0	0	0
DUSP4	0.22	0	0	0	0.68	0	0
DUSP6	0.37	0.14	0	0	0.6	0	0
DYNC1I1	0.12	0.24	0.01	0	0.08	0	0.09
DYNC1I2	0	0.32	0.12	0	0	0	0
DYNC2H1	0	0	0	0.14	0.08	0	0
DYSF	0.19	0	0.12	0	0	0	0.25
DZANK1	0	0.06	0.16	0	0	0	0
DZIP1L	0	0	0	0.42	0.49	0	0.22
E2F3	0	0	0	0	0	0.1	0.03
EBF4	0.08	0	0.12	0.53	0	0.02	0
EBPL	0	0.47	0.01	0	0	0	0.12
ECD	0	0	0	0	0	0	0
ECE1	0	0	0	0	0	0	0.28
ECEL1	0	0.6	0.19	0.34	0	0	0
ECHDC2	0	0.1	0.34	0.51	0	0	0
ECHDC3	0	0.16	0.17	0	0	0	0
EDA	0.08	0.48	0.33	0	0	0.1	0
EDARADD	0	0	0	0.04	0.23	0	0
EDIL3	0.4	0	0	0.13	0	0	0
EEF2K	0	0	0	0	0	0.13	0
EEPD1	0	0	0	0.44	0.31	0.17	0
EFCAB13	0.1	0	0.33	0	0.4	0	0
EFCAB2	0	0	0	0.18	0	0	0
EFCAB8	0.02	0.39	0.16	0	0	0	0
EFCC1	0	0	0.48	0	0	0	0.14
EFEMP2	0.19	0.25	0.11	0	0.19	0.13	0
EFHB	0	0	0.15	0.27	0	0	0
EFHC2	0	0	0.29	0	0	0.03	0
EFHD2	0.3	0	0.3	0	0.12	0	0.04
EFNA1	0	0.11	0.52	0	0	0	0
EFNA5	0	0	0	0.28	0	0.25	0
EFNB1	0	0.27	0.45	0	0	0	0
EFNB2	0.09	0.4	0.3	0	0	0	0
EFNB3	0	0	0	0	0	0	0.2
EFR3A	0	0	0.11	0	0	0	0
EFR3B	0	0	0	0.09	0	0	0
EGFL7	0.06	0.44	0.38	0	0	0	0
EGFL8	0.33	0	0.03	0	0	0	0
EGFR	0	0	0	0.61	0.78	0	0.23
EGLN1	0	0.26	0	0	0	0	0
EGR4	0	0	0	0	0.62	0	0.41
EHBP1	0	0.15	0	0	0	0	0
EHD3	0.2	0	0.34	0	0	0	0
EIF2AK1	0.07	0	0.04	0	0	0	0
EIF2AK2	0	0	0.02	0	0	0	0
EIF2AK3	0.2	0	0.21	0	0	0	0
EIF2AK4	0	0	0	0	0	0	0.03
EIF2B3	0	0.11	0.04	0.2	0	0	0
EIF4E	0	0	0	0	0	0	0.06
EIF4E3	0	0	0	0	0	0	0
EIF4EBP1	0.16	0.57	0.17	0.07	0	0	0
ELAVL2	0.52	0	0	0	0	0.5	0
ELAVL4	0	0	0	0.37	0	0	0
ELF2	0	0.13	0.08	0	0	0	0
ELFN1	0.05	0	0.7	0	0	0	0
ELK3	0	0	0	0	0	0	0.12
ELL	0	0.1	0.17	0	0	0	0
ELMO1	0.22	0.25	0	0.59	0	0	0
ELMO2	0	0	0	0.28	0	0	0
ELMOD1	0	0	0	0.05	0.36	0.42	0
ELMOD2	0.11	0	0	0.05	0	0	0
ELMSAN1	0	0	0	0	0	0	0.31
ELN	0	0	0.19	0.86	0.1	0.49	0
ELOA	0	0	0	0	0	0	0
ELOVL2	0	0	0	0.66	0	0.07	0
ELOVL5	0	0	0	0	0	0.25	0
ELOVL6	0	0	0	0	0	0	0
EMB	0	0	0	0	0	0	0
EMCN	0.72	0.29	0.35	0	0	0	0
EMID1	0.13	0.69	0.35	0	0	0	0
EML1	0	0	0	0	0	0	0.18
EML3	0	0.83	0	0	0	0.43	0
EML4	0	0.12	0	0	0	0	0
EML5	0	0	0	0.14	0.18	0.1	0
EML6	0	0	0	0	0.29	0	0.44
EMP2	0	0.13	0	0.66	0	0	0.4
EMSY	0	0	0.02	0	0	0	0
ENAH	0	0	0	0	0	0	0
ENC1	0	0	0	0	0.09	0	0.27
ENDOU	0	0	0.61	0	0	0	0
ENO1	0	0	0	0.24	0	0	0
ENOSF1	0	0	0	0.24	0.01	0.06	0.28
ENOX1	0.15	0.4	0	0.11	0	0.11	0
ENOX2	0	0	0	0	0	0	0.67
ENPP1	0.23	0	0	0	0.06	0	0.08
ENSA	0	0	0	0	0	0	0
ENSMMUG00000000167	0	0.05	0.01	0.11	0	0	0
ENSMMUG00000000353	0	0	0	0	0	0	0.36
ENSMMUG00000000397	0.06	0	0.03	0	0	0	0
ENSMMUG00000000404	0	0.97	0.3	0	0	0	0
ENSMMUG00000000758	0	0	0	0	0.15	0	0.34
ENSMMUG00000001522	0.08	0	0.08	0	0	0	0.69
ENSMMUG00000001948	0.59	0	0	0.3	0.11	0	0
ENSMMUG00000002011	0	0.14	0.17	0	0	0	0
ENSMMUG00000002133	0	0	0	0	0.3	0	0.21
ENSMMUG00000002273	0	0	0	0	0.11	0	0
ENSMMUG00000002320	0	0	0	0.07	0	0.19	0
ENSMMUG00000002508	0	0	0	0	0	0	0
ENSMMUG00000003002	0	0.22	0.2	0.01	0	0	0
ENSMMUG00000003119	0	0.14	0.07	0	0	0	0
ENSMMUG00000003130	0	0	0	0	0.01	0	0
ENSMMUG00000003289	0	0	0.44	0	0.53	0	0
ENSMMUG00000003419	0	0	0.05	0	0	0	0
ENSMMUG00000003532	0.73	0	0	0	0	0	0
ENSMMUG00000004100	0.57	0	0.2	0	0.06	0	0
ENSMMUG00000004296	0.12	0	0	0	0.1	0	0.05
ENSMMUG00000004431	0.04	0.12	0	0.38	0	0.57	0
ENSMMUG00000004529	0	0	0	0	0	0	0.22
ENSMMUG00000005028	0.36	0	0.69	0	0	0	0
ENSMMUG00000005355	0	0	0	0	0	0	0.35
ENSMMUG00000005482	0	0	0	0.11	0	0.12	0
ENSMMUG00000005880	0	0	0	0	0	0	0.43
ENSMMUG00000005964	0	0.01	0.2	0	0	0	0
ENSMMUG00000006018	0.16	0	0.18	0	0	0.28	0
ENSMMUG00000006343	0	0	0.24	0	0	0	0
ENSMMUG00000006472	0	0	0.32	0	0	0	0
ENSMMUG00000006499	0	0	0	0	0	0	0
ENSMMUG00000006738	0	0	0	0	0	0	0
ENSMMUG00000006778	0	0.09	0.06	0	0	0	0
ENSMMUG00000006803	0.09	0	0	0	0	0	0
ENSMMUG00000007004	0	0.2	0	0	0.47	0	0
ENSMMUG00000007870	0	0	0	0	0	0	0
ENSMMUG00000007970	0	0	0	0	0	0	0.14
ENSMMUG00000008199	0	0	0	0.04	0	0	0
ENSMMUG00000008247	0.2	0.91	0.16	0	0	0	0
ENSMMUG00000008346	0	0	0	0.06	0	0	0
ENSMMUG00000008383	0	0.02	0	0	0	0	0.08
ENSMMUG00000008466	0	0	0	0.36	0.72	0	0.17
ENSMMUG00000008587	0	0.33	0.15	0	0	0	0
ENSMMUG00000008670	0	0.47	0	0.58	0.58	0	0
ENSMMUG00000008718	0	0	0	0	0.05	0	0
ENSMMUG00000008797	0.14	0	0	0.83	0	0	0
ENSMMUG00000009114	0	0	0.25	0	0.48	0	0.03
ENSMMUG00000009264	0	0.01	0.34	0	0	0	0
ENSMMUG00000009810	0.19	0	0	0	0	0.11	0.16
ENSMMUG00000010266	0.23	0.2	0.15	0	0.2	0.11	0
ENSMMUG00000010683	0	0	0	0.02	0	0.26	0.11
ENSMMUG00000010783	0	0.25	0.08	0	0	0	0
ENSMMUG00000010926	0	0	0	0	0	0	0.69
ENSMMUG00000011310	0	0	0	0	0	0.29	0.29
ENSMMUG00000011408	0	0	0	0	0.13	0	0.71
ENSMMUG00000011863	0	0.26	0.38	0.27	0	0	0
ENSMMUG00000011868	0	0	0	0	0.25	0	0.41
ENSMMUG00000012140	0	0	0.06	0	0	0	0
ENSMMUG00000012203	0	0	0.02	0	0.24	0	0.03
ENSMMUG00000012309	0.58	0	0.25	0	0	0	0.1
ENSMMUG00000012407	0	0.32	0	0	0	0	0
ENSMMUG00000012440	0	0.19	0.25	0	0	0	0
ENSMMUG00000012564	0	0	0	0	0.04	0	0
ENSMMUG00000012690	0	0	0	0	0.82	0	0.33
ENSMMUG00000012777	0.34	0	0	0	0.1	0.55	0
ENSMMUG00000012972	0	0	0.3	0	0	0	0
ENSMMUG00000013779	0	0	0.36	0	0	0	0.58
ENSMMUG00000014208	0	0.4	0	0	0	0.25	0
ENSMMUG00000014256	0	0	0	0	0	0.23	0
ENSMMUG00000014885	0.12	0	0	0	0	0	0.75
ENSMMUG00000015270	0	0	0	0	0	0	0
ENSMMUG00000015274	0	0	0.06	0	0	0	0
ENSMMUG00000015513	0	0	0	0	0	0	0
ENSMMUG00000016712	0	0	0	0	0.46	0.94	0
ENSMMUG00000016859	0	0.21	0.71	0	0	0	0
ENSMMUG00000017266	0	0	0	0	0	0.07	0
ENSMMUG00000017270	0	0	0	0.13	0	0	0
ENSMMUG00000017966	0	0	0	0.75	0.48	0.01	0
ENSMMUG00000018474	0	0	0	0	0.06	0	0
ENSMMUG00000018581	0	0.34	0.35	0	0	0	0
ENSMMUG00000018687	0	0.42	0.13	0.19	0	0.02	0
ENSMMUG00000019011	0	0	0	0	0	0	0.44
ENSMMUG00000019858	0	0	0	0	0	0	0.73
ENSMMUG00000020716	0	0.23	0.31	0	0	0	0
ENSMMUG00000020930	0	0	0	0	0	0.34	0
ENSMMUG00000021254	0	0.02	0.35	0	0	0	0
ENSMMUG00000021491	0.12	0	0	0	0.09	0	0.6
ENSMMUG00000021539	0	0	0	0	0	0	0.03
ENSMMUG00000021588	0.11	0.01	0.03	0	0	0	0
ENSMMUG00000021772	0	0	0	0.26	0	0	0
ENSMMUG00000022459	0	0.86	0.21	0.14	0	0	0
ENSMMUG00000022610	0.06	0	0	0	0	0	0.26
ENSMMUG00000022614	0	0	0	0.25	0	0.02	0
ENSMMUG00000022874	0	0.44	0.16	0.57	0	0	0
ENSMMUG00000023152	0	0.13	0.07	0	0	0	0.16
ENSMMUG00000028941	0	0	0	0.9	0	0	0.08
ENSMMUG00000029059	0	0	0	0.31	0	0.03	0
ENSMMUG00000029083	0	0.85	0	0.14	0	0	0
ENSMMUG00000029348	0.28	0.05	0.29	0	0	0	0
ENSMMUG00000029619	0	0	0	0.36	0.68	0.4	0
ENSMMUG00000030384	0	0	0.18	0	0	0	0
ENSMMUG00000031000	0.18	0	0.69	0	0	0	0
ENSMMUG00000031100	0	0	0.03	0	0	0	0.17
ENSMMUG00000031412	0.2	0	0	0.49	0	0	0
ENSMMUG00000031438	0.2	0	0.21	0.19	0.15	0.14	0.16
ENSMMUG00000031594	0	0.31	0.78	0	0	0	0
ENSMMUG00000031833	0	0	0	0	0	0.33	0.79
ENSMMUG00000031902	0.19	0	0.2	0	0	0	0.14
ENSMMUG00000032143	0.44	0	0	0	0.09	0	0
ENSMMUG00000032231	0	0	0	0	0.27	0	0.03
ENSMMUG00000038051	0	0.97	0	0	0	0	0
ENSMMUG00000038867	0	0	0	0	0	0	0.38
ENSMMUG00000038943	0	0	0	0	0	0	0.64
ENSMMUG00000039301	0	0	0.25	0	0	0	0
ENSMMUG00000040079	0	0.88	0.13	0	0	0.2	0
ENSMMUG00000041688	0.1	0.14	0.01	0	0	0	0
ENSMMUG00000042475	0.31	0	0.62	0	0	0	0
ENSMMUG00000043246	0.03	0	0	0	0	0	0.39
ENSMMUG00000043859	0.32	0	0	0	0	0	0.53
ENSMMUG00000043952	0	0	0	0	0	0	0
ENSMMUG00000043974	0.06	0	0	0	0	0	0
ENSMMUG00000044585	0	0.1	0.16	0	0	0	0
ENSMMUG00000045944	0.08	0.34	0.15	0	0	0	0
ENSMMUG00000046135	0	0.44	0.34	0	0	0	0
ENSMMUG00000046228	0	0.87	0.53	0	0	0	0
ENSMMUG00000046479	0.35	0.69	0.19	0	0	0	0
ENSMMUG00000047393	0.11	0	0	0	0.21	0	0.59
ENSMMUG00000047533	0	0	0.57	0	0	0	0
ENSMMUG00000047632	0	0	0	0	0	0.07	0.02
ENSMMUG00000047978	0	0.34	0.14	0.15	0	0	0
ENSMMUG00000048215	0	0	0	0	0	0	0
ENSMMUG00000048694	0.36	0.06	0.4	0	0	0	0
ENSMMUG00000049177	0	0	0.17	0	0	0	0
ENSMMUG00000049398	0.03	0	0	0.3	0.68	0	0
ENSMMUG00000049422	0	0	0.04	0	0	0.07	0.26
ENSMMUG00000049544	0	0	0.18	0.09	0	0	0
ENSMMUG00000049560	0	0	0	0.33	0	0	0.05
ENSMMUG00000049789	0	0.35	0.07	0	0	0	0.04
ENSMMUG00000049799	0	0.26	0.26	0	0	0	0
ENSMMUG00000049809	0	0	0.06	0	0	0	0.48
ENSMMUG00000049996	0	0.02	0.18	0	0	0	0
ENSMMUG00000050001	0	0	0	0	0	0.08	0.33
ENSMMUG00000050007	0.13	0.01	0	0.52	0.25	0	0
ENSMMUG00000050185	0	0	0.02	0	0	0.11	0.47
ENSMMUG00000050280	0	0	0	0.16	0	0	0.28
ENSMMUG00000050291	0	0	0	0.14	0.6	0.41	0
ENSMMUG00000050342	0	0	0	0.07	0	0	0
ENSMMUG00000050371	0	0.44	0.1	0	0	0	0
ENSMMUG00000050507	0.65	0	0	0	0.17	0	0
ENSMMUG00000050670	0.05	0	0.03	0	0	0	0
ENSMMUG00000050758	0.47	0	0	0	0	0	0.61
ENSMMUG00000050989	0	0.24	0	0	0	0	0
ENSMMUG00000051180	0.74	0	0.28	0	0	0	0
ENSMMUG00000051265	0.1	0	0.1	0	0.06	0	0.13
ENSMMUG00000051386	0	0	0	0	0	0.49	0.45
ENSMMUG00000051392	0	0	0	0	0	0	0.04
ENSMMUG00000051498	0	0.14	0.08	0	0	0	0
ENSMMUG00000051870	0	0	0	0.96	0	0	0.18
ENSMMUG00000051928	0	0.03	0.12	0	0	0	0
ENSMMUG00000051957	0	0.47	0	0	0	0.03	0
ENSMMUG00000051977	0	0.93	0	0	0	0	0
ENSMMUG00000052132	0.12	0	0.02	0	0	0	0
ENSMMUG00000052136	0	0.62	0.3	0	0	0	0
ENSMMUG00000052196	0.58	0	0.76	0	0	0	0
ENSMMUG00000052333	0	0.9	0.16	0	0	0	0
ENSMMUG00000052421	0	0.67	0	0	0	0	0
ENSMMUG00000052424	0	0.2	0	0.01	0.17	0.13	0
ENSMMUG00000052511	0	0.44	0.39	0	0	0	0
ENSMMUG00000052822	0.43	0.4	0.33	0	0	0	0
ENSMMUG00000052876	0.61	0.21	0	0	0	0	0
ENSMMUG00000052891	0	0.9	0.24	0	0	0	0
ENSMMUG00000053060	0.22	0.02	0.26	0	0	0	0
ENSMMUG00000053116	0.24	0	0	0	0	0	0
ENSMMUG00000053145	0.09	0.18	0.71	0	0	0	0
ENSMMUG00000053163	0	0.39	0.14	0	0	0	0
ENSMMUG00000053391	0	0	0	0	0.19	0	0.15
ENSMMUG00000053397	0.11	0	0	0	0.08	0.05	0.56
ENSMMUG00000053723	0.16	0.36	0.61	0	0	0	0
ENSMMUG00000053733	0	0.01	0.13	0.23	0	0	0
ENSMMUG00000054069	0	0	0	0	0	0	0.03
ENSMMUG00000054125	0	0	0	0	0	0.09	0.61
ENSMMUG00000054212	0	0.3	0	0	0	0	0.13
ENSMMUG00000054335	0	0	0	0.25	0	0.08	0.28
ENSMMUG00000054348	0	0.72	0	0	0.34	0	0
ENSMMUG00000054501	0	0.92	0	0	0	0	0
ENSMMUG00000054512	0	0.68	0	0	0	0	0
ENSMMUG00000054520	0.2	0	0	0.01	0	0.33	0.31
ENSMMUG00000054531	0	0	0	0	0.63	0	0.57
ENSMMUG00000054948	0	0	0.06	0	0.35	0	0.02
ENSMMUG00000054965	0	0.05	0.23	0.36	0	0	0
ENSMMUG00000055013	0	0.51	0.06	0	0	0	0
ENSMMUG00000055077	0	0	0.23	0	0	0	0
ENSMMUG00000055079	0	0.41	0.14	0	0	0	0.03
ENSMMUG00000055197	0	0	0.11	0	0	0	0.36
ENSMMUG00000055263	0	0.02	0.14	0.42	0	0	0
ENSMMUG00000055590	0	0.5	0.41	0	0.32	0	0
ENSMMUG00000055664	0.3	0	0.51	0	0	0	0.04
ENSMMUG00000055690	0.21	0	0.18	0.23	0.23	0.24	0.21
ENSMMUG00000055901	0.68	0	0.28	0	0	0	0
ENSMMUG00000055946	0	0	0.37	0	0.01	0	0
ENSMMUG00000055986	0.7	0.3	0	0	0.27	0	0
ENSMMUG00000056022	0	0.93	0	0	0	0	0
ENSMMUG00000056174	0.12	0	0	0	0.04	0	0.2
ENSMMUG00000056325	0.46	0	0	0	0	0.08	0.09
ENSMMUG00000056441	0	0.65	0.41	0	0	0	0
ENSMMUG00000056485	0	0.93	0	0	0	0	0
ENSMMUG00000056532	0	0	0.36	0	0	0	0.43
ENSMMUG00000056553	0	0	0	0	0.11	0.38	0.44
ENSMMUG00000056576	0	0	0	0.33	0.21	0.44	0.12
ENSMMUG00000056646	0	0	0.01	0	0	0	0.06
ENSMMUG00000056683	0	0.05	0.01	0	0	0	0
ENSMMUG00000056728	0	0.37	0.66	0	0	0	0
ENSMMUG00000056811	0.01	0	0	0	0	0	0.22
ENSMMUG00000056920	0.11	0	0	0.55	0	0.69	0
ENSMMUG00000057005	0	0	0	0	0	0.17	0.73
ENSMMUG00000057465	0	0	0	0	0.42	0	0.65
ENSMMUG00000057523	0	0	0.08	0	0	0	0
ENSMMUG00000057609	0	0.69	0.27	0	0	0	0
ENSMMUG00000057710	0	0.38	0.27	0	0	0	0
ENSMMUG00000058325	0.04	0.74	0.16	0	0	0	0
ENSMMUG00000058553	0	0.32	0.27	0	0	0	0
ENSMMUG00000058881	0.24	0.55	0.22	0	0	0	0
ENSMMUG00000059139	0	0	0.16	0	0.55	0	0.05
ENSMMUG00000059177	0.15	0	0.14	0.19	0	0	0
ENSMMUG00000059206	0	0	0	0.05	0.63	0	0
ENSMMUG00000059343	0	0.01	0	0	0	0	0.52
ENSMMUG00000059505	0.26	0.43	0.43	0	0	0	0
ENSMMUG00000059510	0	0.71	0.15	0	0	0	0
ENSMMUG00000059616	0	0	0	0.09	0	0	0.57
ENSMMUG00000059728	0	0.02	0.17	0.36	0.3	0	0
ENSMMUG00000059779	0	0	0	0.32	0.25	0.37	0.12
ENSMMUG00000059833	0.4	0	0	0	0.58	0	0
ENSMMUG00000059924	0	0.17	0	0	0	0	0
ENSMMUG00000060140	0.1	0	0	0	0.44	0	0.03
ENSMMUG00000060287	0	0	0	0.16	0	0.18	0
ENSMMUG00000060369	0	0.92	0	0	0	0	0
ENSMMUG00000060382	0.17	0	0	0	0.07	0	0.64
ENSMMUG00000060600	0	0	0	0	0.53	0.43	0
ENSMMUG00000060622	0	0.93	0	0	0	0	0.18
ENSMMUG00000060677	0.51	0.09	0.31	0	0	0	0
ENSMMUG00000060794	0	0	0	0	0	0	0.23
ENSMMUG00000061038	0	0	0.08	0.38	0	0.09	0
ENSMMUG00000061047	0	0	0	0	0	0.4	0.74
ENSMMUG00000061079	0.07	0.18	0	0	0	0	0
ENSMMUG00000061185	0.22	0	0	0	0	0.15	0.75
ENSMMUG00000061205	0	0.38	0.36	0	0	0	0
ENSMMUG00000061249	0	0.16	0	0	0	0	0.4
ENSMMUG00000061637	0	0	0.07	0	0	0	0.65
ENSMMUG00000061812	0.16	0	0	0	0	0	0.25
ENSMMUG00000061908	0	0.44	0.3	0	0	0.07	0.23
ENSMMUG00000062040	0	0.07	0	0.88	0	0	0
ENSMMUG00000062066	0.03	0	0.06	0.39	0	0	0
ENSMMUG00000062077	0.18	0	0.1	0.22	0.2	0.23	0.16
ENSMMUG00000062305	0.11	0.3	0	0	0	0	0
ENSMMUG00000062346	0	0	0	0	0	0	0.7
ENSMMUG00000062356	0	0	0	0.24	0.42	0	0
ENSMMUG00000062541	0	0	0.15	0	0	0.03	0.1
ENSMMUG00000062565	0	0.9	0	0.21	0	0	0
ENSMMUG00000062573	0	0.05	0.04	0	0	0	0
ENSMMUG00000062652	0	0	0	0	0.16	0	0.64
ENSMMUG00000062783	0	0.15	0	0	0.71	0	0
ENSMMUG00000062792	0	0.43	0	0.46	0	0.33	0
ENSMMUG00000062803	0	0.67	0.32	0	0	0	0
ENSMMUG00000062842	0	0.33	0.39	0	0	0	0
ENSMMUG00000062930	0	0	0	0	0	0	0.31
ENSMMUG00000062960	0	0.02	0	0	0	0	0.71
ENSMMUG00000063058	0.08	0	0	0	0	0.24	0.67
ENSMMUG00000063274	0.33	0.51	0	0	0	0	0
ENSMMUG00000063312	0	0.06	0.07	0	0	0	0
ENSMMUG00000063348	0.15	0	0.13	0	0	0	0
ENSMMUG00000063453	0	0	0	0.41	0.14	0.31	0
ENSMMUG00000063541	0	0	0.13	0	0	0	0
ENSMMUG00000063556	0	0.84	0.11	0	0	0	0
ENSMMUG00000063574	0.23	0.12	0.26	0	0	0	0
ENSMMUG00000063611	0	0	0	0	0.34	0	0.72
ENSMMUG00000063628	0	0.06	0.03	0	0	0	0
ENSMMUG00000063831	0	0	0	0	0	0.14	0.71
ENSMMUG00000063852	0	0.04	0.04	0	0	0	0
ENSMMUG00000063874	0	0	0.52	0	0.55	0	0
ENSMMUG00000064071	0	0	0	0.13	0.1	0.19	0
ENSMMUG00000064139	0	0	0	0.03	0.34	0	0
ENSMMUG00000064140	0	0.5	0.44	0	0	0	0
ENSMMUG00000064188	0	0	0	0.2	0.73	0	0
ENSMMUG00000064543	0	0.29	0.19	0.17	0	0	0
ENSMMUG00000064922	0	0	0.17	0	0	0	0.14
ENSMMUG00000064964	0	0.4	0.13	0	0	0.1	0
ENSMMUG00000065034	0	0	0	0.55	0	0.04	0.39
ENSMMUG00000065072	0.26	0.15	0.35	0	0	0	0
ENSMMUG00000065089	0	0	0	0	0	0	0
ENSMMUG00000065142	0	0	0	0.33	0	0.13	0.24
ENSMMUG00000065172	0.43	0	0	0	0.25	0.07	0.19
ENSMMUG00000065261	0.08	0.02	0.1	0	0	0	0
ENTPD2	0	0.43	0.4	0	0	0	0
ENTPD3	0.02	0	0.23	0	0	0	0
ENTPD4	0	0	0.09	0	0	0	0
EP400	0	0.13	0	0	0	0	0
EPAS1	0	0	0.06	0.88	0	0	0
EPB41	0	0	0	0.17	0.07	0.24	0
EPB41L2	0.13	0	0	0	0	0	0.21
EPB41L3	0	0.1	0	0	0	0	0.1
EPB41L4A	0	0.3	0.56	0	0	0	0
EPB41L4B	0	0	0.09	0	0	0	0
EPDR1	0	0	0	0	0.11	0	0
EPHA3	0.39	0.69	0.15	0	0	0.07	0
EPHA4	0.29	0	0.28	0	0	0	0
EPHA5	0	0	0	0.44	0	0.31	0.02
EPHA6	0	0	0	0.36	0.05	0.53	0
EPHA7	0.02	0	0	0	0.04	0.74	0.05
EPHB1	0.07	0.04	0.32	0	0	0	0
EPHB2	0	0	0	0	0	0	0
EPHB4	0.15	0	0	0	0	0	0
EPHB6	0.06	0	0.29	0	0.16	0	0
EPHX2	0.2	0	0	0.24	0.26	0	0
EPS15	0	0	0	0.1	0	0	0.19
EPS8	0	0.24	0.03	0	0	0	0
EPS8L2	0.33	0.03	0.5	0	0	0	0
EPSTI1	0.23	0	0.16	0	0	0	0
ERAL1	0.05	0.13	0.11	0	0	0	0
ERAP2	0	0	0.45	0	0	0.06	0
ERBB4	0.33	0.11	0	0	0.33	0	0
ERBIN	0	0	0	0	0.04	0	0
ERC1	0.12	0.13	0.16	0.2	0.2	0.17	0.16
ERC2	0.14	0	0.11	0.1	0.24	0	0.17
ERLEC1	0	0	0.03	0	0	0	0
ERN1	0	0.54	0.39	0	0	0	0
ERO1B	0	0.31	0.22	0	0	0	0
ESR1	0	0.65	0.75	0	0	0	0
ESR2	0	0.04	0.7	0	0	0	0
ESRRG	0	0	0	0	0	0	0.02
ESYT2	0	0	0.02	0	0	0	0
ESYT3	0.13	0.08	0.36	0	0	0	0
ETNK1	0	0.22	0.14	0	0	0	0
ETS2	0	0	0	0	0.39	0	0.25
ETV1	0	0.12	0.36	0.53	0	0	0
ETV5	0	0	0	0.22	0.48	0	0
ETV6	0	0	0	0	0	0	0.68
EVA1C	0	0.56	0.22	0	0	0	0
EVC	0	0.57	0	0	0	0	0
EVI5	0	0	0	0.17	0	0.06	0
EVL	0	0.14	0.05	0	0	0	0
EXOC1	0	0.13	0	0	0	0	0
EXOC2	0	0	0	0	0	0	0.01
EXOC3L1	0	0.08	0	0.83	0	0.58	0
EXOC4	0.13	0	0.13	0.06	0	0.19	0.07
EXOC6	0	0.13	0	0	0	0	0
EXOC6B	0.11	0	0.13	0.28	0.19	0.04	0.17
EXOC7	0	0	0.05	0	0	0	0
EXOG	0	0	0	0	0.09	0	0
EXT1	0	0.19	0	0.2	0.14	0	0
EXT2	0	0.19	0	0	0	0	0
EYA1	0	0	0	0.97	0	0.1	0
EYA2	0.06	0.59	0.33	0.63	0	0	0
EYA4	0	0	0.74	0	0.12	0	0
EYS	0	0.37	0	0	0	0	0
F10	0	0	0.15	0	0	0	0.12
F11R	0.06	0.48	0.4	0	0	0	0
F12	0	0.28	0.42	0	0	0	0
F13A1	0	0.68	0.49	0	0	0	0
F2R	0	0.55	0.03	0.68	0	0	0
F2RL2	0	0	0	0.61	0.36	0.34	0
F3	0.07	0.84	0	0	0.13	0	0
FABP3	0	0.01	0.04	0	0	0	0
FABP5	0	0.72	0	0	0	0	0
FADS1	0	0.19	0	0	0	0	0
FADS2	0	0.47	0.1	0	0	0	0
FADS3	0.06	0	0.07	0	0	0	0
FAIM	0	0	0	0	0	0	0
FAM102B	0	0	0	0	0	0.29	0
FAM107A	0.02	0	0	0	0	0.03	0.07
FAM107B	0	0	0	0.55	0.63	0.02	0
FAM110B	0	0	0	0	0.01	0	0
FAM114A1	0	0	0	0.31	0.74	0	0.43
FAM122B	0	0	0	0.65	0	0	0
FAM122C	0	0	0.05	0.2	0	0	0
FAM124A	0	0	0	0	0.27	0	0.53
FAM126A	0	0	0	0	0.16	0	0.55
FAM135A	0	0	0	0.03	0	0	0
FAM135B	0.04	0	0	0	0	0	0.07
FAM13A	0	0	0	0	0	0	0
FAM13B	0	0.28	0.21	0	0	0	0
FAM13C	0	0	0	0	0.02	0	0
FAM149A	0	0.12	0	0	0	0	0.04
FAM149B1	0	0	0.07	0.09	0	0	0
FAM151A	0	0	0.39	0	0.31	0	0
FAM155A	0.25	0.18	0.25	0	0.24	0.24	0.25
FAM162A	0	0	0	0.19	0	0.05	0
FAM162B	0	0.84	0	0	0	0.11	0
FAM166C	0	0	0	0	0	0.21	0.7
FAM168A	0.08	0	0.04	0	0.04	0	0
FAM171A1	0	0	0	0.05	0	0.11	0
FAM171B	0	0	0	0	0	0	0
FAM172A	0	0.08	0.09	0	0	0	0.04
FAM178A	0	0	0	0.01	0	0	0.07
FAM184A	0	0	0	0	0.03	0	0
FAM184B	0	0	0.07	0	0	0	0.08
FAM189A1	0	0	0	0	0.13	0	0.01
FAM189A2	0	0	0.07	0	0	0.7	0
FAM189B	0.18	0.43	0.05	0	0	0	0
FAM199X	0	0	0	0	0	0.2	0
FAM19A5	0	0	0	0	0	0	0.19
FAM20A	0	0.89	0	0	0.07	0	0
FAM20C	0.05	0	0.06	0	0	0.3	0
FAM214A	0	0	0	0.19	0	0	0
FAM216A	0	0	0.01	0	0	0	0.06
FAM227A	0	0	0.03	0	0	0.02	0.08
FAM3C	0.26	0.41	0	0	0	0	0
FAM49A	0	0	0	0.27	0	0	0
FAM49B	0.05	0	0	0.04	0.04	0.12	0
FAM53A	0	0.41	0	0	0	0	0.05
FAM78B	0	0	0	0	0	0	0.15
FAM81A	0	0.12	0	0	0	0	0
FAM83B	0	0	0.09	0	0	0.04	0.69
FAM83C	0.02	0	0	0.89	0	0	0
FAM92B	0	0	0	0	0	0.07	0.53
FAM98A	0.18	0	0.06	0	0	0	0
FANCA	0	0	0.18	0	0	0	0
FANCC	0	0.14	0.09	0.19	0	0.09	0
FANCD2	0.02	0.34	0.28	0	0	0	0
FAR2	0	0	0	0.37	0.11	0	0
FARP1	0	0.05	0.42	0	0	0.05	0
FARP2	0	0	0	0	0	0	0.21
FARS2	0	0	0	0	0	0	0
FASTKD1	0	0	0	0	0	0.08	0
FAT1	0	0	0.65	0	0	0.32	0
FAT3	0.82	0	0	0	0	0.09	0.33
FAT4	0	0	0.69	0	0.03	0	0
FAXC	0	0	0	0	0	0	0
FBLIM1	0.12	0.72	0.3	0	0	0	0
FBLN5	0.18	0	0	0	0	0	0.56
FBN1	0	0.08	0	0.62	0.75	0.05	0
FBN2	0	0.5	0	0	0.59	0.54	0
FBN3	0	0.56	0.41	0	0	0	0.48
FBXL13	0	0	0	0.1	0	0.1	0
FBXL19	0	0.04	0.26	0	0	0	0
FBXL3	0	0.42	0	0	0	0	0
FBXL7	0	0	0	0.66	0	0.26	0.54
FBXO15	0	0.15	0.17	0	0	0	0
FBXO16	0	0	0	0	0	0	0
FBXO2	0.19	0.1	0.29	0	0	0	0
FBXO21	0	0	0	0	0	0	0.01
FBXO32	0	0	0	0	0	0.37	0.56
FBXO42	0	0	0	0	0	0	0
FBXW7	0	0.05	0	0	0	0	0.04
FCHO2	0	0.48	0.24	0	0	0	0
FCHSD2	0.16	0	0.18	0	0.11	0	0.19
FCRL6	0	0.44	0	0	0.33	0	0
FDFT1	0.08	0.1	0	0	0	0	0
FDPS	0.05	0.42	0.06	0	0	0	0
FECH	0	0	0.07	0	0	0	0
FER	0	0.2	0.04	0.06	0	0	0
FER1L6	0	0.59	0.43	0	0	0	0
FERMT1	0.1	0	0	0.46	0.17	0.81	0
FERMT2	0	0.11	0	0.72	0	0.18	0
FEZ2	0	0	0.1	0	0	0	0.01
FEZF1	0.39	0.51	0.18	0	0	0	0
FFAR4	0	0.2	0.01	0	0	0	0.59
FGD3	0.6	0	0	0.04	0	0	0
FGD4	0.23	0	0	0.06	0	0	0.09
FGD5	0.11	0	0	0	0	0	0.54
FGD6	0	0.4	0.12	0	0	0	0.02
FGF1	0.29	0	0.11	0	0.07	0	0.51
FGF10	0.33	0	0	0	0.03	0	0.55
FGF11	0	0.93	0	0	0	0	0
FGF12	0.02	0	0	0	0	0	0.11
FGF13	0.57	0.54	0	0	0	0	0
FGF14	0.08	0	0.21	0.17	0.2	0.1	0.27
FGF5	0	0	0	0	0.92	0	0
FGF9	0	0.06	0.03	0	0	0	0.6
FGFR1	0	0	0	0.59	0	0	0
FGFR2	0.32	0	0	0	0.59	0	0
FGFRL1	0.2	0.88	0.17	0	0	0	0
FGGY	0	0.13	0	0	0	0	0
FHAD1	0	0.62	0.15	0	0	0	0
FHIT	0.11	0	0	0	0	0.78	0
FHL1	0	0	0.12	0	0	0	0
FHOD1	0	0.55	0.27	0	0	0	0
FHOD3	0	0.1	0	0.12	0.23	0.14	0
FIBCD1	0	0	0.74	0	0	0	0.13
FIG4	0	0	0	0	0	0	0.18
FIGN	0	0	0	0.48	0.37	0	0.39
FILIP1L	0.24	0	0.24	0.13	0.22	0.21	0.24
FKBP14	0	0	0	0.06	0	0.12	0.15
FKBP1B	0.26	0	0.26	0	0	0	0.24
FKBP5	0	0.17	0.35	0	0	0	0.17
FLI1	0	0.17	0.15	0	0	0.61	0
FLNA	0	0.4	0.3	0	0	0	0
FLNB	0	0	0	0	0	0	0
FLVCR2	0.45	0.42	0.02	0	0	0	0
FMN1	0	0	0	0.15	0.11	0.03	0.42
FMN2	0.1	0	0.14	0.16	0	0	0.09
FMNL2	0	0.21	0	0.12	0.2	0	0.04
FNBP1	0	0.22	0.06	0.07	0	0.1	0
FNBP1L	0	0.16	0	0.14	0	0	0
FNDC11	0	0.26	0.7	0	0	0	0
FNDC3A	0	0	0	0	0.17	0	0.09
FNDC3B	0	0.02	0	0.4	0	0	0
FNIP1	0.16	0	0.07	0.22	0.17	0.16	0.04
FNIP2	0	0	0	0	0	0.05	0
FNTB	0	0	0	0.05	0	0	0
FOCAD	0.23	0	0.2	0	0	0	0.2
FOSB	0	0	0	0	0.71	0.38	0
FOSL2	0	0	0.56	0	0.41	0	0
FOXA3	0.12	0.92	0	0	0	0	0
FOXN2	0.15	0	0	0	0	0	0
FOXN3	0	0	0	0.11	0	0	0
FOXO1	0	0	0	0.61	0.39	0.59	0.34
FOXO3	0	0	0	0.01	0	0.06	0
FOXP1	0	0	0.07	0	0	0.11	0
FOXP2	0	0	0	0	0	1	0
FRAS1	0.93	0	0	0	0	0	0
FREM2	0.32	0	0	0.68	0	0	0
FRMD3	0.02	0.39	0.51	0	0	0	0
FRMD4A	0.23	0	0.24	0.2	0.24	0.2	0.24
FRMD4B	0.1	0.47	0.42	0	0	0	0.17
FRMD5	0	0.22	0.19	0.15	0	0	0
FRMD6	0	0	0.65	0	0.1	0	0
FRMPD2	0.07	0	0	0	0	0	0.68
FRMPD3	0	0	0	0	0	0	0.54
FRMPD4	0	0	0	0	0.66	0.21	0.32
FRY	0.15	0.07	0.18	0	0	0	0
FRYL	0	0	0	0.12	0.03	0	0
FSD1	0	0	0.18	0	0	0	0
FSD1L	0	0.07	0.29	0	0	0	0
FSIP1	0	0	0	0.31	0	0.3	0
FST	0.23	0	0.73	0	0	0.07	0
FSTL1	0	0.32	0	0.67	0	0.07	0
FSTL4	0	0	0	0	0	0.88	0
FSTL5	0	0.07	0	0.18	0.72	0	0
FTO	0.13	0	0.06	0.18	0.16	0	0.11
FUT8	0	0	0	0.04	0	0.01	0
FUT9	0	0	0.05	0	0	0	0.13
FXYD5	0.03	0.31	0.1	0	0	0	0
FXYD7	0	0.14	0.13	0	0	0	0
FYN	0	0	0	0	0	0.06	0.05
FZD6	0	0.64	0.16	0.12	0.09	0	0
G0S2	0	0	0	0	0.54	0	0.24
GAA	0	0.01	0.22	0	0	0	0
GAB1	0	0	0	0.63	0	0.21	0
GAB2	0	0	0	0	0	0	0.06
GAB3	0	0.58	0.22	0.37	0	0	0
GABBR1	0	0	0	0	0	0	0
GABBR2	0	0	0	0	0.19	0.14	0
GABPB2	0	0.32	0	0.13	0	0	0
GABRA1	0.01	0	0	0	0.01	0	0
GABRA2	0.2	0.33	0.18	0	0	0	0
GABRA3	0.22	0	0	0	0	0	0
GABRA4	0	0	0.49	0	0	0	0
GABRA5	0	0	0	0	0	0	0.59
GABRB2	0	0	0.38	0	0.05	0	0
GABRB3	0.2	0	0.23	0.21	0.12	0.12	0.19
GABRB3.1	0.15	0	0.07	0	0.16	0	0.2
GABRD	0	0	0	0.79	0	0.44	0.33
GABRG1	0.18	0	0	0	0	0	0
GABRG2	0	0	0	0.16	0	0	0
GABRG3	0	0	0.11	0.26	0	0.33	0
GABRQ	0	0	0.33	0	0	0	0.62
GAD1	0.48	0	0	0	0	0.48	0
GAD2	0.22	0.03	0	0	0	0.57	0
GADD45A	0	0	0	0.16	0.49	0	0
GADD45B	0	0.46	0.42	0	0	0	0
GADD45G	0	0	0.39	0	0.34	0	0.2
GADL1	0	0	0	0	0	0.53	0.59
GALC	0	0.12	0.11	0	0	0	0
GALNT1	0	0	0	0	0	0	0
GALNT10	0.1	0	0.02	0	0	0.05	0
GALNT11	0	0	0	0	0	0	0
GALNT13	0.38	0.01	0	0	0	0	0.19
GALNT14	0.08	0.66	0.39	0	0.41	0	0
GALNT16	0	0	0	0.14	0	0	0
GALNT17	0	0	0	0.18	0.38	0	0.21
GALNT18	0	0	0	0.05	0.35	0	0
GALNT2	0	0	0	0	0.21	0.01	0.1
GALNT3	0	0	0	0	0.35	0	0.53
GALNT6	0	0.72	0	0	0.2	0	0
GALNT7	0	0	0.62	0	0	0	0
GALNTL6	0.17	0.25	0.39	0	0	0	0
GALR1	0	0	0	0.82	0.06	0	0
GANC	0	0	0.23	0	0	0	0
GAP43	0	0	0	0	0	0	0.02
GAPDH	0	0	0	0.03	0	0.04	0
GAREM1	0.26	0	0	0	0	0	0
GAS2	0.14	0.02	0.4	0	0	0	0
GAS2L1	0.15	0.28	0.3	0	0	0	0
GAS6	0.16	0	0.01	0	0	0	0
GAS7	0	0	0	0	0.15	0	0.05
GAS8	0	0.01	0.08	0	0	0	0
GATA4	0.34	0	0.12	0.58	0.28	0	0
GATAD1	0	0	0	0	0.03	0	0
GATAD2B	0	0	0	0	0	0	0
GBE1	0	0	0	0	0.27	0	0
GBF1	0	0	0	0.09	0	0.02	0
GCFC2	0	0	0	0.12	0	0.14	0
GCH1	0	0	0	0	0.02	0	0.46
GCK	0.31	0	0.06	0	0.08	0	0.48
GCLC	0	0	0.02	0	0	0	0.14
GCNT2	0	0.52	0	0	0	0	0
GCSH	0	0.31	0	0.13	0	0	0
GDA	0	0	0	0.15	0	0	0.1
GDAP1L1	0	0	0	0	0	0	0
GDF10	0	0.82	0.58	0	0	0	0
GDPD1	0	0	0.21	0	0	0	0
GEM	0.35	0	0	0	0.8	0	0
GFPT2	0.06	0	0.7	0	0	0	0
GFRA1	0	0	0	0.64	0.63	0.25	0
GFRA2	0	0	0	0	0.12	0	0.73
GFRAL	0.42	0.47	0	0	0	0	0
GGA2	0	0	0	0	0	0	0.02
GGH	0.1	0.18	0.23	0	0	0	0
GGT7	0	0	0	0	0	0	0
GHR	0	0	0.65	0	0	0	0.09
GHSR	0	0	0	0.3	0	0	0.65
GIPC1	0	0	0.18	0	0	0	0
GIPC2	0	0.07	0	0	0	0	0.69
GIT2	0	0	0.01	0	0	0	0
GJA8	0	0.94	0	0	0	0	0
GLB1L3	0	0.89	0.44	0	0	0	0
GLCCI1	0	0	0	0.41	0	0	0
GLCE	0	0.01	0	0	0	0.09	0
GLDC	0	0	0	0.52	0	0	0.33
GLDN	0	0	0	0	0	0	0.55
GLG1	0	0	0.06	0	0	0	0
GLIPR1L2	0	0	0.11	0	0	0.34	0
GLIPR2	0.15	0	0	0	0	0.64	0
GLIS1	0	0.01	0.04	0.85	0	0	0
GLIS3	0	0	0	0.9	0	0	0.45
GLO1	0	0	0.1	0	0	0	0
GLRA1	0	0.8	0.68	0	0	0	0
GLRA2	0.12	0	0	0	0	0	0.41
GLRA3	0	0	0	0.18	0	0.32	0
GLRB	0	0.08	0	0.08	0	0	0
GLS	0	0	0	0	0	0	0.05
GLS2	0.16	0	0	0	0	0	0.17
GLT8D2	0	0.05	0.33	0	0	0	0
GLTP	0	0	0.16	0	0	0	0
GLUD1	0	0	0	0	0	0	0
GLUL	0	0	0	0	0.18	0	0.26
GMDS	0	0.22	0.21	0	0	0	0.12
GMIP	0.24	0.2	0.63	0	0	0	0
GMPR	0.28	0	0	0	0.29	0.8	0
GMPS	0	0.27	0.2	0	0	0	0
GNA14	0	0	0	0.31	0.76	0	0.09
GNAI1	0.27	0	0	0	0	0	0
GNAL	0	0	0	0	0	0	0.53
GNAO1	0	0	0	0	0.07	0.09	0.04
GNAQ	0.15	0	0	0	0.14	0.1	0.18
GNG12	0	0	0.37	0.16	0	0	0
GNG2	0	0	0	0	0	0	0
GNG4	0.53	0	0.17	0	0	0	0
GNMT	0.24	0	0.39	0	0	0	0
GNS	0	0.02	0	0	0	0	0
GOLGB1	0	0	0	0	0	0	0
GOLIM4	0.16	0.05	0.66	0	0	0	0
GOLM1	0	0	0	0.11	0	0.7	0
GOPC	0	0.06	0	0	0	0	0
GPALPP1	0	0	0	0	0	0	0
GPAT3	0	0	0	0	0.01	0	0.38
GPC3	0	0	0	0	0.2	0	0.72
GPC4	0	0.73	0.79	0	0	0	0
GPC5	0.63	0.29	0	0	0	0	0
GPC6	0	0	0.03	0	0	0	0.36
GPD2	0	0	0.04	0	0	0	0
GPHA2	0.01	0.88	0.04	0	0	0.15	0
GPHN	0.23	0	0.22	0.2	0.23	0.17	0.24
GPLD1	0	0.21	0.19	0	0	0	0
GPM6A	0.04	0	0.07	0.22	0.1	0.15	0.09
GPM6B	0	0	0	0	0	0	0.09
GPR101	0	0.72	0.59	0	0	0	0
GPR107	0	0	0.02	0	0	0	0
GPR137B	0	0.5	0	0	0	0	0
GPR137C	0.02	0.29	0.3	0	0	0	0
GPR139	0.08	0.36	0.19	0	0	0	0
GPR143	0.47	0	0.17	0	0.1	0	0.26
GPR149	0	0	0	0	0	0	0.74
GPR153	0.71	0	0.42	0	0	0	0
GPR155	0.05	0	0	0.38	0	0.54	0
GPR156	0	0.6	0.09	0.11	0	0	0
GPR158	0	0	0	0.31	0.25	0.38	0
GPR171	0	0	0	0	0.07	0	0.63
GPR176	0	0	0.11	0.02	0	0.06	0
GPR39	0	0	0	0	0	0.12	0.66
GPR63	0.24	0.29	0.38	0	0	0	0
GPRC5B	0	0	0	0	0.1	0	0.23
GPRC5C	0	0.96	0.04	0	0	0	0
GPRIN3	0	0.25	0.09	0.09	0	0	0
GPT2	0	0	0	0.01	0	0.25	0
GPX3	0.61	0	0	0	0	0	0
GRAMD1B	0	0.06	0.02	0	0	0	0
GRAMD1C	0.09	0	0	0.37	0	0.49	0
GRAMD2A	0	0	0	0.07	0	0	0.2
GRAP2	0	0.88	0.23	0.11	0	0	0
GRB10	0	0	0	0	0	0	0
GREB1	0	0	0.07	0.32	0	0.14	0
GREB1L	0	0.33	0.46	0	0	0	0
GRHL1	0	0	0	0	0	0	0.32
GRIA1	0.23	0.06	0.21	0	0	0.13	0.2
GRIA2	0.23	0.23	0.23	0.08	0.09	0.2	0
GRIA3	0	0.35	0.34	0	0	0	0.02
GRIA4	0.2	0	0.23	0.23	0.2	0	0.04
GRID1	0	0.22	0.2	0.22	0.22	0.22	0
GRID2	0.21	0	0.23	0.21	0.25	0.23	0.25
GRIK1	0	0	0.13	0	0	0.52	0
GRIK2	0.25	0	0.24	0.24	0	0.16	0.15
GRIK3	0.66	0.38	0.19	0	0.76	0	0
GRIK4	0.01	0.09	0.17	0	0.09	0	0.02
GRIN2A	0	0	0	0	0.65	0	0
GRIN2B	0.14	0	0.08	0.12	0.06	0.18	0.11
GRIN2C	0	0.43	0.32	0	0	0	0
GRIN2D	0.08	0.23	0.25	0.14	0	0	0
GRIN3A	0	0	0	0	0	0.04	0.72
GRIP1	0	0.13	0.03	0.19	0	0	0
GRIP2	0	0	0	0.08	0	0	0.2
GRK3	0	0.6	0.12	0	0	0	0
GRM1	0.1	0	0	0	0	0	0.64
GRM2	0.32	0	0.7	0	0	0	0
GRM3	0.41	0	0	0	0	0	0
GRM4	0.38	0	0.37	0	0.08	0	0
GRM5	0.16	0	0.04	0	0	0.2	0.21
GRM7	0	0	0.22	0.2	0	0.2	0.2
GRM8	0	0.26	0	0	0.04	0	0
GRP	0	0.72	0.51	0	0	0	0
GRTP1	0.26	0	0	0	0.07	0.49	0
GSAP	0	0	0	0	0.03	0	0
GSDME	0	0	0.09	0	0.31	0	0
GSE1	0	0	0	0	0	0.08	0
GSG1L	0.1	0.23	0.31	0	0	0	0
GSK3B	0.05	0	0.12	0.15	0	0	0
GSN	0	0.04	0.66	0	0	0	0
GSTA3	0	0	0	0.96	0	0.4	0
GSTA4	0	0	0	0.17	0	0.02	0
GSTM2	0.02	0	0.02	0	0.16	0	0
GSTM3	0	0.04	0.2	0	0	0	0
GSTO2	0	0	0	0	0.58	0	0.08
GSTT1	0.36	0	0.48	0	0	0	0
GSTZ1	0.13	0.1	0.17	0	0	0	0
GTDC1	0	0	0	0	0	0	0.1
GTF2F2	0	0	0.01	0	0	0	0.03
GTF2IRD1	0	0.05	0	0	0	0	0
GTF3C2	0	0	0.08	0	0	0	0
GUCY1A1	0	0.23	0	0.23	0	0	0
GUCY1A2	0.38	0.13	0	0.05	0	0	0
GUCY1B1	0	0	0	0.33	0	0	0
GULP1	0.66	0	0	0	0	0.91	0
GVQW2	0	0.01	0.59	0	0	0	0
GYG2	0.01	0.54	0.13	0	0	0	0
HACD1	0.29	0	0	0	0	0.07	0
HACD2	0	0	0	0	0	0	0
HACD4	0.18	0	0.26	0	0	0	0.14
HACL1	0	0	0.01	0	0	0	0
HAPLN2	0	0.49	0.38	0.41	0	0	0
HAPLN4	0	0	0.3	0.77	0	0.28	0
HAS2	0	0.82	0.16	0.5	0	0	0
HAUS6	0	0.01	0.2	0	0	0	0
HAUS7	0	0.03	0.24	0	0	0	0
HBB	0	0.84	0.2	0	0	0.15	0
HBP1	0	0	0	0.24	0.01	0.03	0
HBS1L	0	0.03	0	0.03	0	0	0
HCFC1R1	0	0	0.1	0	0	0	0
HCN1	0.15	0	0	0	0.09	0	0
HCRTR2	0	0	0.05	0	0.52	0	0.29
HDAC1	0	0.09	0	0.55	0.22	0.34	0
HDAC10	0	0	0.03	0	0	0	0
HDAC4	0	0.08	0.11	0.18	0	0	0
HDAC9	0.2	0	0	0	0	0.44	0.3
HDC	0	0	0	0.69	0.45	0.24	0
HEATR5A	0	0	0.06	0	0	0	0
HEBP1	0	0	0	0	0	0.22	0.29
HECA	0	0.09	0.37	0	0	0	0
HECTD2	0.06	0.18	0.4	0	0.05	0	0
HECW1	0	0.1	0.39	0	0	0	0
HECW2	0	0	0	0	0	0.08	0
HEG1	0.41	0.2	0.41	0	0	0	0
HELLS	0	0	0.17	0	0	0	0
HEMGN	0	0.73	0.43	0	0	0	0
HEPH	0	0	0	0.12	0.13	0	0.66
HERC1	0.1	0	0.01	0	0	0	0
HERC2	0	0	0	0	0	0	0
HERC3	0	0	0.03	0.05	0	0	0
HES4	0.65	0	0.54	0	0	0.01	0
HEXD	0	0	0	0	0	0	0.1
HEY2	0	0.03	0	0.91	0.01	0.14	0
HFM1	0	0	0	0	0.33	0	0
HGSNAT	0.12	0	0.03	0.04	0.03	0.17	0
HHIPL1	0	0	0.63	0	0.26	0	0
HIBCH	0	0	0	0.07	0	0	0
HIC1	0	0	0	0	0.14	0	0.69
HIF1AN	0	0	0	0	0	0	0
HIP1	0.12	0	0	0.12	0	0	0
HIP1R	0.02	0	0	0	0	0.2	0
HIPK2	0	0.32	0.12	0	0	0	0
HIPK4	0	0.06	0.27	0	0	0	0.3
HIVEP1	0.19	0	0	0	0.03	0	0
HIVEP3	0	0.01	0.03	0	0	0.04	0
HLCS	0	0.13	0.04	0	0	0	0
HLF	0	0	0	0.66	0	0	0
HLTF	0	0	0	0.08	0	0	0
HMBOX1	0	0	0	0.15	0.05	0.02	0
HMCN2	0	0.14	0.72	0	0	0	0.02
HMGA2	0.5	0.93	0	0	0	0	0
HMGB1	0.02	0.2	0.12	0	0	0	0
HMGCLL1	0	0	0.03	0	0	0	0
HMGCS1	0.09	0.37	0	0	0	0	0
HMGN3	0	0	0	0.2	0.26	0.06	0
HMOX1	0	0	0	0.87	0.03	0.08	0
HNMT	0	0	0	0.28	0	0	0.02
HNRNPA2B1	0	0	0	0.06	0.03	0.06	0
HNRNPA3	0	0	0	0	0	0	0
HNRNPD	0	0	0	0.02	0	0	0
HNRNPDL	0	0.02	0	0	0	0	0
HNRNPK	0	0.12	0.05	0	0	0	0
HNRNPLL	0	0	0.02	0	0	0	0.14
HOMER1	0	0	0	0	0	0	0
HOMER2	0	0.01	0	0	0	0	0
HOOK2	0.11	0	0.34	0	0	0	0
HOPX	0.48	0	0	0	0	0	0
HPCA	0.47	0	0.47	0	0	0	0
HPCAL1	0	0	0.3	0	0	0	0
HPGD	0	0	0	0.38	0	0	0.6
HPS3	0	0.24	0.05	0	0	0	0
HPSE2	0	0	0	0	0	0	0.14
HRH1	0.07	0	0	0	0	0	0.84
HRH2	0	0.55	0.67	0	0	0	0
HS2ST1	0	0.07	0	0	0	0	0
HS3ST1	0	0.32	0.59	0	0	0	0
HS3ST2	0	0.56	0	0	0.75	0	0.29
HS3ST3B1	0.23	0.94	0	0	0	0.02	0
HS3ST4	0.21	0.08	0.22	0	0	0.05	0.19
[truncated: 2,725 more rows]
