# Supplementary material for: Cross-species analysis defines the conservation of anatomically segregated VMH neuron populations
Source: eLife journal article supplement (doi:10.7554/elife.69065), 2021-05-21
Supplement: supp [file elife-69065-supp-v1.zip › elife_poa_e69065_Supplementary_file_8.csv]

Gene	Esr1_1	Esr1_2	Esr1_3	Dlk1_1	Dlk1_2	Fezf1_1	Fezf1_2	Lepr_1	Lepr_2	Lepr_3	Nfib_1	Nfib_2	Foxp2_1	Foxp2_2	Doublets_1	Doublets_2	Doublets_3
Slc19a2	0	0.41	0	0.35	0	0	0.3	0	0.01	0	0	0	0	0	0	0.4	0
Syngr3	0	0	0	0	0.06	0	0	0.23	0	0	0	0	0	0	0.14	0	0
Msantd2	0	0	0.04	0	0.07	0	0	0.22	0	0	0	0	0	0	0.1	0.01	0.09
Phka2	0.09	0	0	0.18	0	0	0	0	0	0	0	0	0.27	0.38	0	0.01	0
Kif13a	0	0	0	0	0	0	0	0	0.64	0.4	0.04	0.21	0	0	0	0	0
Herc2	0	0.25	0.09	0	0	0	0.15	0	0	0	0	0	0	0	0	0.1	0
G3bp2	0	0.09	0	0	0	0	0.03	0	0	0	0	0	0	0	0	0.19	0
Plxna2	0.11	0	0	0	0.11	0.1	0.52	0.01	0.07	0.13	0	0	0	0.34	0.12	0	0.28
Rab9	0.05	0	0	0	0.43	0	0	0.74	0	0	0	0	0	0	0.04	0	0.5
Usp13	0	0.01	0	0	0	0	0	0	0	0	0	0	0	0	0.27	0.1	0
Jakmip2	0.12	0.19	0.12	0.16	0	0.05	0.19	0	0	0	0	0	0	0	0	0.19	0
Npr2	0	0.11	0	0	0	0	0	0	0	0	0	0	0	0	0	0.16	0
Zc3h12a	0	0	0	0	0	0	0.59	0	0	0	0.76	0	0	0	0	0	0.89
Xpr1	0	0	0	0.08	0	0	0.2	0	0.12	0	0.09	0.02	0	0	0	0.18	0
Cd83	0	0	0	0	0.14	0	0.05	0.41	0	0	0	0	0	0	0	0.03	0
Adcy1	0	0	0	0	0	0	0	0	0.06	0.04	0.8	0.49	0.79	0.44	0.13	0.17	0
Echdc3	0	0.94	0.48	0	0	0	0.58	0	0	0	0.02	0	0	0	0	0.49	0
Rreb1	0	0	0.09	0	0	0.6	0	0.71	0.64	0.19	0	0	0	0.64	0.31	0	0.67
Acer2	0	0.84	0.65	0	0	0.06	0.34	0	0	0	0	0	0	0	0	0.28	0
Obsl1	0	0.13	0	0.06	0	0	0.27	0	0	0	0	0	0	0	0	0.16	0
Relt	0	0	0	0	0	0	0.08	0	0.39	0	0.27	0	0	0	0.13	0.06	0
Slc13a4	0	0.33	0.01	0.08	0	0	0.33	0	0	0	0	0	0.07	0.13	0	0	0
Nbeal2	0	0.27	0	0	0	0	0	0	0.07	0.2	0	0	0.06	0	0	0.11	0
Sox10	0	0.73	0	0.7	0	0	0.27	0	0.02	0	0	0	0	0	0	0.3	0
Ptger4	0.51	0.03	0.1	0.22	0.45	0	0	0.01	0	0	0	0	0	0	0.12	0	0
Klf3	0	0.02	0	0	0	0.08	0	0	0.47	0.19	0.67	0	0	0	0	0.3	0
Adgrf3	0	0.86	0.33	0.08	0	0	0.66	0	0.06	0	0	0.17	0	0	0	0.55	0
Thop1	0	0.26	0	0.06	0	0	0.3	0	0.11	0	0	0	0	0	0	0.22	0
Ascc1	0	0.5	0	0.02	0	0	0.43	0	0	0	0	0	0	0	0	0.2	0
Lrrc8b	0	0	0	0	0	0	0	0.06	0.2	0.12	0	0	0.46	0	0	0.06	0
Klf4	0	0.79	0.87	0	0	0	0	0	0	0	0.24	0	0	0	0	0.41	0
Mro	0.82	0	0.54	0	0	0.61	0	0	0	0	0	0	0	0.13	0.36	0	0
Espn	0.51	0	0	0.15	0.75	0	0	0.38	0	0	0	0	0	0	0.76	0.07	0.3
Wdr54	0	0.77	0.31	0	0	0	0.28	0	0.12	0	0	0.09	0	0	0	0.13	0
Masp1	0.71	0.41	0.52	0	0.9	0	0	0	0	0	0.55	0	0	0	0	0.18	0
Pdzrn4	0.59	0	0.33	0.17	0.57	0.58	0.36	0.02	0	0	0	0	0	0	0	0	0
Aspn	0	0.44	0	0.63	0.1	0.54	0.35	0	0	0	0	0	0	0	0	0.44	0
Hacd2	0	0	0	0	0	0	0	0.08	0	0	0	0	0	0	0.06	0	0
Cnrip1	0.06	0	0	0	0.05	0	0	0.58	0	0	0	0	0	0	0.06	0	0.07
Kcnc4	0	0	0	0	0	0.21	0	0.33	0.01	0	0	0	0	0.17	0.58	0.04	0
Opa3	0	0.16	0.37	0	0	0	0.03	0	0	0	0	0	0	0	0	0.34	0
Ttc34	0.5	0	0	0.42	0.37	0.64	0	0.07	0	0	0	0.26	0	0	0	0	0
Sez6l	0	0.28	0	0	0	0.19	0.37	0	0.11	0	0	0	0	0	0	0.18	0
Radil	0	0	0	0	0.46	0	0	0.36	0	0.16	0	0	0	0	0.22	0	0.06
Tsc2	0	0.46	0	0	0	0	0.28	0	0	0	0	0	0	0	0	0.06	0
Tmem181a	0	0	0	0	0.15	0.09	0	0.13	0.02	0	0	0	0.05	0	0.02	0	0
Zyg11b	0	0.1	0.13	0	0	0	0.17	0	0	0	0	0	0	0	0	0.1	0
Cacul1	0	0.19	0	0	0	0	0	0	0	0	0	0	0	0	0	0.11	0
Tmem70	0	0	0	0	0	0	0	0.65	0	0	0	0	0	0	0	0	0
Stt3b	0	0	0	0	0	0.04	0	0	0.44	0	0.25	0	0	0	0	0.01	0
Tdrd3	0	0.09	0.13	0	0	0	0	0	0.25	0	0	0.15	0.16	0	0	0.13	0
Hmcn2	0	0.05	0	0	0	0.32	0	0.97	0.75	0.84	0	0	0	0	0.14	0	0
Suco	0	0.32	0	0	0	0	0	0	0	0	0	0	0	0	0	0	0
Tceal7	0	0.88	0	0	0	0	0.18	0	0	0	0.06	0.16	0	0	0	0.6	0
Olr1	0.01	0.84	0.08	0	0	0	0.28	0	0.01	0.08	0	0	0	0.11	0	0.25	0
Anxa11	0	0.98	0.55	0.06	0	0.22	0.81	0	0	0	0	0	0	0	0	0.09	0
Arl4c	0.44	0	0	0	0.8	0	0	0.8	0.01	0	0	0	0	0	0.36	0	0
Fads1	0	0.37	0.17	0	0	0	0.14	0	0	0	0	0	0	0	0	0.14	0
Cir1	0	0.09	0	0	0	0	0	0	0	0	0	0.1	0	0	0	0.1	0.09
Nedd4	0.03	0	0	0	0.41	0.15	0	0.61	0	0	0	0	0	0	0.24	0	0.42
Mbip	0	0.39	0	0.13	0	0	0.1	0	0	0	0	0	0	0	0	0	0
Cmtm6	0	0.19	0	0	0	0	0.55	0	0.06	0	0.08	0	0	0	0	0.86	0
Tmed10	0	0	0	0	0.1	0	0	0.09	0	0	0.01	0	0	0	0	0	0.03
Asap1	0	0	0	0.05	0.08	0	0	0	0	0	0.13	0	0	0	0.17	0.18	0.16
Nr2c2ap	0.08	0	0	0	0.57	0	0	0.72	0.09	0.06	0	0	0	0	0.04	0	0.09
Mgat5	0	0	0	0	0	0.18	0.23	0	0	0.02	0	0.15	0.06	0	0	0.2	0.03
Son	0	0	0	0	0.15	0.13	0	0.32	0.07	0	0.06	0	0	0.17	0.2	0	0.34
Hdac11	0	0	0	0	0.12	0	0	0.45	0	0	0	0	0	0	0.31	0	0
Gadd45b	0.31	0.72	0.65	0	0	0	0	0	0	0	0	0	0	0	0	0	0.23
Ngef	0	0.18	0	0.03	0	0.1	0	0	0	0	0	0	0	0	0	0.04	0
Acadsb	0	0	0	0.19	0.15	0	0	0.06	0	0	0	0	0	0	0	0	0
Slc15a2	0.04	0	0.22	0	0.34	0	0	0.04	0	0	0	0	0	0	0.49	0.18	0.15
Ubtd1	0.2	0	0	0	0	0	0.17	0	0	0	0	0	0	0	0.72	0.01	0
Fbn1	0	0	0	0	0	0	0	0	0	0	0.84	0.76	0.59	0	0	0.08	0
Elavl4	0	0	0	0.29	0	0	0	0	0	0	0.08	0.14	0	0	0	0.06	0.34
Cgrrf1	0	0.3	0	0	0	0	0.12	0	0	0	0	0.06	0	0	0	0.03	0
Wwc1	0.22	0.45	0.38	0.01	0	0	0.14	0	0	0	0	0	0	0	0	0.07	0
Zfp655	0	0.36	0	0	0	0	0.25	0	0	0	0	0	0	0	0	0.22	0
Ppt2	0	0.15	0	0	0	0	0.56	0	0	0	0	0	0	0	0	0.03	0
Prr14	0	0	0	0	0.12	0.03	0	0.47	0	0	0	0	0	0	0.22	0	0.23
Trio	0	0.24	0.1	0	0	0	0.2	0	0.12	0	0	0.04	0	0	0	0.17	0
Adcyap1	0.12	0.49	0.08	0	0	0	0.13	0	0.01	0	0	0	0.28	0	0	0	0
Htr4	0.5	0.14	0.49	0.64	0.43	0.55	0.49	0	0	0	0	0	0	0	0.05	0.02	0
Bmp4	0.96	0.63	0.53	0	0	0	0	0	0	0	0	0	0	0	0	0.01	0
Macrod1	0	0	0	0	0	0	0	0	0	0	0.46	0	0	0	0.55	0	0.09
Grin2a	0.28	0	0	0	0	0.09	0	0.43	0	0	0.42	0	0	0	0.43	0	0.41
Junb	0	0	0	0	0.12	0.19	0	0.1	0	0	0	0	0	0.03	0.68	0.08	0.94
Gfra4	0.38	0	0	0	0.41	0.08	0	0.7	0	0	0	0	0	0	0.1	0	0.05
Hpcal4	0	0.11	0	0	0	0	0.09	0	0	0	0	0	0	0	0	0	0
Klhl3	0.14	0.3	0.4	0.01	0	0	0	0	0	0	0	0	0	0	0	0	0
Rbm10	0	0	0	0	0.05	0	0	0.18	0	0	0	0	0	0	0.17	0.02	0.46
Hmgcll1	0	0	0.04	0.11	0	0.03	0	0.15	0	0	0	0	0	0	0.07	0	0.05
Fzd4	0.07	0.26	0	0.12	0	0	0.27	0	0	0	0	0.44	0.17	0	0	0.43	0
Ect2l	0	0.31	0	0	0	0	0.18	0	0.45	0.26	0.16	0	0	0	0	0.27	0
Usp19	0	0	0	0	0.55	0.08	0	0.58	0	0	0	0	0	0	0.43	0	0.02
Ddx52	0	0.44	0	0	0	0	0.28	0	0	0	0	0	0	0	0	0.31	0
Hps1	0	0	0.05	0.07	0.44	0	0	0.24	0	0	0	0	0	0	0.04	0	0
Prkcb	0.23	0	0	0	0.08	0.18	0	0.26	0	0	0	0	0.05	0.21	0.21	0	0.18
Ube2j1	0	0	0	0	0	0	0	0.24	0	0	0	0	0	0	0.06	0	0
Arhgef12	0	0.16	0	0.17	0	0	0	0	0	0	0.06	0	0	0	0	0.19	0
Dok7	0.1	0	0	0.6	0	0	0.49	0	0	0	0	0	0	0.8	0	0.1	0
Itm2b	0	0	0	0	0.21	0	0	0.38	0	0.14	0.25	0.18	0	0.05	0.26	0	0.29
Nadsyn1	0	0.48	0.46	0	0	0	0.29	0	0	0	0	0	0	0	0	0.15	0
Pld2	0.78	0.03	0	0	0	0.31	0.04	0.44	0	0	0	0	0	0	0	0	0.69
Pex14	0	0.1	0	0	0	0	0	0	0	0	0	0	0	0	0	0.06	0
Ccdc187	0	0	0	0	0	0	0	0.96	0.34	0.74	0	0	0.92	0.64	0	0	0
Dnajb14	0	0.32	0	0	0	0	0.31	0	0	0	0	0.05	0	0	0	0.13	0
Cpeb2	0	0.08	0	0	0	0.39	0.13	0	0	0	0	0.03	0	0	0	0	0
Nfia	0	0	0	0	0	0	0	0	0	0	0.99	0.38	0	0	0	0.05	0
Rwdd2a	0	0	0	0.04	0.51	0	0	0.15	0	0	0	0	0	0	0.39	0	0.01
Sec24b	0	0.01	0	0.11	0	0	0.01	0	0	0	0	0	0	0	0	0.13	0
Gprc5b	0	0	0	0	0	0	0.21	0	0.5	0	0	0	0	0	0	0.25	0
Tmem80	0	0.39	0	0.18	0	0	0.41	0	0	0	0	0	0	0	0	0.01	0
Ten1	0.28	0	0	0.04	0.42	0	0	0.75	0	0	0	0	0	0	0	0	0
Srpk2	0	0.09	0	0	0	0	0.12	0.05	0.16	0.2	0.15	0	0	0	0	0.18	0
Il34	0	0.03	0	0	0	0	0	0	0	0.15	0	0	0	0.21	0.15	0	0
Spatc1l	0.89	0.64	0.37	0	0	0	0.39	0	0	0	0	0	0	0	0	0	0
Oxnad1	0	0.34	0	0.05	0	0	0.47	0	0	0	0	0	0	0	0	0.49	0
Ehmt2	0	0	0	0	0.15	0	0	0.02	0	0	0	0	0	0	0	0	0.03
Laptm5	0	0.29	0	0	0	0.33	0	0	0.49	0.21	0.15	0	0	0.11	0	0.22	0
Npas1	0	0	0	0	0	0.92	0	0	0.04	0.09	0	0	0	0	0.51	0	0.4
Hk2	0.17	0	0.09	0	0.39	0	0	0	0.74	0.15	0.04	0	0	0	0	0.26	0
Il5ra	0	0.85	0.12	0	0	0.42	0.17	0	0	0	0	0	0	0	0	0.31	0.33
Sema3f	0.39	0.56	0	0.51	0.59	0.27	0.34	0	0	0	0	0	0	0	0	0.01	0
Tomm40	0.09	0	0	0	0	0	0	0.48	0	0	0	0	0	0	0.54	0	0.56
Polr2j	0	0	0	0	0.19	0	0	0.44	0	0	0	0	0	0	0	0	0.42
Nr1i2	0	0.44	0	0	0	0	0.73	0	0	0.16	0.15	0.15	0	0	0	0.44	0
Klc4	0	0.28	0	0	0	0	0.19	0	0	0.02	0	0.03	0	0	0	0.38	0
Stau1	0	0.16	0	0	0	0	0	0	0	0	0	0	0	0	0	0.26	0
Dydc2	0	0.44	0.39	0	0	0	0	0	0	0	0	0	0	0	0	0.05	0
Mpzl1	0	0	0	0	0.18	0	0.03	0	0	0	0	0	0	0.05	0	0.17	0
Kcna1	0	0	0	0	0	0.79	0	0.39	0.14	0.17	0	0	0	0.6	0.62	0	0.66
Miga1	0	0.17	0	0	0	0	0.04	0	0	0	0	0	0	0	0	0.07	0
Cacna1h	0	0	0	0	0.22	0.43	0	0.3	0.1	0	0	0	0	0.66	0	0	0.14
Sgip1	0	0.02	0	0.05	0	0.19	0.15	0.23	0.18	0.13	0	0	0.16	0.2	0.08	0	0
Prkch	0.31	0.28	0.11	0.76	0	0.29	0.36	0	0	0	0	0	0.43	0	0	0	0
Mxi1	0	0.08	0	0	0	0	0	0	0	0	0.09	0.48	0.25	0	0	0.19	0
Adra2a	0.12	0	0	0	0	0	0	0.02	0	0	0	0.61	0.92	0	0.08	0	0.08
Bcan	0.39	0	0	0	0	0	0	0	0	0	0.08	0.23	0	0	0.11	0.23	0
Spns1	0	0	0	0	0.31	0.18	0	0.83	0	0	0	0	0	0	0.45	0	0.09
Polb	0.14	0	0	0	0	0.04	0	0.32	0	0	0	0	0	0	0.2	0	0
Mical2	0.56	0.01	0.23	0.23	0.07	0.2	0.04	0.02	0	0	0	0	0	0	0	0	0
Ace	0	0.75	0.15	0.09	0	0	0.47	0	0	0	0	0	0	0	0	0.48	0
Sorcs1	0.22	0.41	0.14	0	0.14	0.64	0	0	0.05	0.19	0	0.19	0	0.34	0.15	0	0
Pak2	0	0.28	0.04	0	0	0	0.02	0	0	0	0	0	0	0	0	0.23	0
H2-Eb2	0	0.85	0.12	0.1	0	0	0.74	0	0.13	0	0	0.11	0	0	0	0.54	0
Ptprn	0	0	0	0	0.28	0	0	0.28	0	0	0	0	0	0	0.23	0	0.06
Aktip	0	0	0	0	0.03	0	0	0.15	0	0	0	0	0	0	0.14	0	0
Zc3h6	0.01	0	0.12	0.08	0.17	0	0	0.08	0	0	0	0	0	0	0.16	0	0
Dydc1	0.11	0.37	0.57	0	0	0	0.32	0	0.03	0	0.09	0	0	0	0	0.42	0
Gpr68	0	0	0	0.15	0.78	0	0	0.72	0.13	0	0	0	0	0	0.02	0	0
Mbd4	0	0.14	0	0	0	0	0.1	0	0.05	0	0	0	0.28	0	0	0.11	0
Ccdc177	0	0	0	0	0.12	0.18	0	0.35	0	0.19	0	0	0	0	0.73	0	0.5
Fam92a	0	0.07	0	0.07	0	0	0.15	0	0	0	0	0	0	0	0	0	0
Carmil1	0	0.44	0.3	0	0	0	0	0	0	0.12	0	0	0	0	0	0.24	0
Neto1	0	0.18	0	0	0	0.48	0	0	0	0	0	0	0.81	0.28	0	0.56	0.05
Arf1	0	0	0	0	0	0	0	0.01	0	0	0.19	0	0	0	0.05	0	0.33
Rgs10	0	0	0	0	0.23	0.14	0	0.05	0	0	0	0.41	0.29	0	0.13	0.18	0
Upp2	0.06	0	0	0	0.51	0.03	0	0.78	0	0	0	0	0.2	0.16	0.49	0	0.54
Sybu	0	0.23	0.15	0.23	0.13	0	0.23	0	0.17	0.16	0	0	0.04	0	0.03	0.11	0
Ephx1	0.45	0.42	0.51	0.06	0	0.17	0	0	0	0	0	0	0	0	0	0	0
Tpbg	0.29	0	0	0	0	0	0.08	0	0.24	0.05	0.21	0	0	0.73	0.02	0	0.96
Bco1	0	0.61	0	0.37	0	0	0.37	0	0	0	0	0.13	0	0	0	0.43	0
Oxtr	0.7	0.06	0.81	0	0.22	0.87	0	0	0	0	0	0	0	0.03	0	0.1	0
Snx30	0	0.16	0	0	0	0	0	0	0	0	0	0	0	0	0	0.08	0
Hpf1	0	0	0.09	0	0.02	0.1	0	0	0	0	0	0	0	0	0.02	0	0.06
Tspyl4	0	0	0	0	0.55	0	0	0.33	0	0	0.08	0	0	0	0.12	0	0.46
Snx19	0	0.28	0	0	0	0	0.14	0	0	0	0	0	0	0	0	0.07	0
B3gnt2	0	0	0.22	0	0	0	0	0.33	0.1	0.21	0	0	0	0	0.11	0.15	0
Rcl1	0	0	0	0	0	0	0	0	0.03	0	0.08	0	0	0	0	0	0.33
Mdh1	0	0	0	0	0	0	0	0.17	0	0.07	0.15	0	0	0	0.18	0	0.26
Cep164	0	0	0.08	0.03	0.04	0	0	0	0	0	0	0	0	0	0.02	0	0.05
Irak2	0	0.19	0	0.1	0.05	0	0.31	0	0.34	0	0	0	0	0	0	0.13	0
Oaz2	0	0	0	0	0.11	0	0	0.23	0	0	0	0	0	0	0.18	0	0
Zfp398	0	0	0	0	0	0.11	0	0.43	0	0	0	0	0	0	0.13	0	0
Ypel2	0	0	0	0	0.06	0.12	0.22	0	0	0	0	0	0	0	0	0	0.16
Hgf	0	0	0	0	0	0	0	0	0	0.38	0	0	0	0	0.36	0	1
Arfgap1	0.12	0	0	0	0.24	0.14	0	0.34	0	0	0	0	0	0	0.33	0	0.08
Nova2	0	0	0	0	0.19	0	0	0.29	0	0	0	0	0	0	0.03	0	0
Rgs14	0	0.11	0.24	0	0	0.19	0	0	0.49	0.2	0	0	0.25	0	0	0	0
Mta3	0	0.22	0.03	0	0	0	0.09	0	0	0	0	0	0	0	0	0	0
AI661453	0	0.9	0.17	0	0	0	0.37	0	0	0	0	0	0.48	0.58	0	0	0
Slc38a4	0	0.15	0.89	0.15	0.25	0	0	0.05	0	0	0	0	0.78	0	0	0	0
Dnajc5	0	0	0	0	0.06	0	0	0.55	0	0	0	0	0	0	0.25	0	0
Shank3	0.08	0	0	0	0.15	0.07	0	0	0	0	0	0	0	0	0.12	0	0
Lhfp	0.56	0.88	0.87	0	0	0	0	0	0	0	0	0	0.34	0	0	0	0.54
Galnt12	0.02	0.29	0	0	0	0	0.33	0	0.44	0	0	0	0	0	0	0.43	0
Cnot3	0	0	0	0	0	0.21	0	0.35	0	0	0	0	0	0	0	0	0.23
Kdm1a	0	0.12	0	0.09	0	0	0.08	0	0	0	0	0	0	0	0	0.12	0
Ggh	0	0.59	0.23	0	0	0	0.45	0	0	0	0	0	0	0	0	0.13	0
Slc12a8	0.12	0.54	0.68	0	0.21	0	0	0	0	0	0	0	0	0	0	0.18	0
Ndufb3	0	0	0	0	0.22	0	0	0.65	0	0	0	0	0	0	0.5	0	0.72
Pfkfb4	0.12	0	0	0	0.04	0	0	0.46	0	0	0	0	0	0	0.01	0	0
Dock5	0	0	0	0	0	0.1	0	0	0.89	0.51	0	0	0	0	0	0	0.93
Kctd17	0.01	0	0	0	0.18	0	0	0.69	0	0	0	0	0	0	0.15	0	0
Atp8a2	0	0.2	0	0	0	0.18	0.24	0	0.17	0.16	0	0	0	0	0	0.16	0
Lin7a	0.4	0.17	0.14	0.3	0.05	0.51	0	0	0	0	0	0	0	0	0	0.1	0
Igflr1	0	0.64	0.29	0.26	0	0	0.72	0	0	0	0.01	0	0	0	0	0	0
Ino80c	0	0.37	0	0	0	0	0.52	0	0.42	0.12	0.08	0.14	0	0	0	0.39	0
Mrps12	0	0	0	0	0.49	0	0	0.51	0	0	0	0	0	0	0.18	0	0.3
Insig2	0	0	0	0	0.14	0	0	0.51	0	0	0	0	0	0	0	0	0
Phtf1	0.1	0.09	0.16	0	0	0	0	0	0	0	0	0	0	0	0	0.03	0
Kri1	0	0	0	0.08	0.38	0.03	0	0.64	0	0	0	0	0	0	0.01	0	0
Casc1	0	0.76	0	0	0	0	0.62	0	0.04	0	0.02	0.35	0.08	0	0	0.63	0
Dgkk	0	0.84	0.78	0	0	0.02	0	0	0.26	0.61	0	0	0	0	0	0.7	0
Coq5	0	0	0	0	0.5	0	0	0.84	0	0	0	0	0	0	0.25	0	0.34
Bcl2l13	0	0.35	0	0	0	0	0	0	0	0	0	0	0	0	0	0.23	0
Arsb	0	0	0	0	0	0.21	0	0.24	0	0	0	0.07	0.37	0	0	0	0.06
Dock10	0	0.07	0.49	0	0	0.16	0	0	0.49	0	0	0	0.36	0.28	0	0	0.25
Galnt18	0	0	0	0	0	0.2	0.25	0.27	0.22	0.08	0.28	0	0	0	0	0	0.29
Pim2	0	0	0	0	0.48	0.23	0	0.69	0.02	0	0	0	0	0	0.52	0	0
Myo5c	0.22	0	0.4	0	0	0	0	0	0.72	0.39	0	0	0	0	0	0	0
Aven	0	0.45	0	0	0	0	0	0	0.78	0.22	0	0.07	0.08	0	0	0.33	0
Zfp672	0	0	0	0	0.56	0	0	0.47	0	0	0	0	0	0	0.61	0	0.36
Tom1l1	0	0.22	0	0	0	0	0.31	0	0	0.19	0	0	0	0	0	0	0
Dync1i2	0.04	0.06	0.22	0	0	0.12	0	0.12	0.16	0.04	0	0	0.13	0.2	0.02	0	0
Klkb1	0	0.25	0.62	0	0.12	0.07	0.09	0	0	0	0	0	0	0	0	0.18	0
Phf21b	0	0.85	0	0	0	0.14	0	0	0.48	0.21	0.64	0.74	0	0	0	0.62	0
Wnt2	0	0.93	0.99	0.65	0	0	0.27	0	0	0	0	0	0	0	0	0	0
Mtrr	0	0.71	0	0	0	0	0.56	0	0.05	0	0	0	0	0	0	0.62	0
Lin28b	0.22	0	0.55	0.13	0.06	0	0	0.2	0	0	0	0	0	0	0.06	0	0
Nnmt	0	0.98	0.94	0	0	0	0	0	0.17	0	0	0	0	0	0	0	0
Slc4a9	0	0.3	0.26	0.16	0	0	0.72	0	0	0	0	0.05	0	0.16	0	0.41	0
Med27	0	0.25	0	0	0	0	0.07	0	0	0	0	0	0	0	0	0.11	0
Abhd18	0	0.08	0.32	0.48	0	0	0.12	0	0	0	0	0	0.06	0.14	0	0	0
Arap2	0	0.03	0.05	0.77	0	0	0.82	0	0	0	0	0	0.24	0.08	0	0.67	0
Tmem246	0	0	0	0	0.45	0	0	0.21	0	0	0	0	0	0	0.25	0	0.05
Col5a2	0	0.2	0.67	0	0	0	0.17	0	0	0	0	0	0.78	0	0	0.2	0.7
D16Ertd472e	0	0.58	0.41	0	0	0	0	0	0	0	0	0	0.7	0	0	0.14	0
Rragd	0	0	0	0	0	0	0	0.14	0.33	0	0	0	0	0.12	0	0	0
Armcx2	0	0	0	0	0.01	0	0	0	0.11	0	0.02	0	0	0	0.48	0	0.39
Agt	0	0	0	0	0	0	0	0.29	0	0	0.03	0	0	0.37	0	0	0.43
Pgd	0	0.44	0.1	0	0	0	0	0	0.02	0	0	0	0	0	0	0.1	0
Magt1	0.01	0.06	0	0.26	0	0	0	0	0	0	0	0	0	0	0	0.54	0
Asb2	0	0.69	0	0	0	0	0.48	0	0.1	0	0	0	0.45	0	0	0.11	0
Sccpdh	0	0.32	0.16	0	0	0	0.03	0	0	0	0	0.14	0	0	0	0.06	0
Dym	0	0.33	0.14	0	0	0	0.13	0	0	0	0	0	0	0	0	0.21	0
Glcci1	0	0.84	0.05	0.09	0	0	0.43	0	0.02	0	0.06	0.72	0	0	0	0.51	0
Rtl5	0	0	0	0	0.19	0	0	0.31	0	0	0	0	0.1	0.38	0	0.08	0.42
Erbb3	0	0.65	0	0	0	0	0.25	0	0.15	0.03	0	0.01	0	0	0	0.82	0
Sipa1l2	0	0.54	0.8	0.15	0	0	0.57	0	0	0	0	0	0	0.11	0	0.54	0
Elovl7	0	0	0.4	0	0	0	0	0	0.24	0.11	0	0	0	0.64	0	0.3	0
Zfp329	0.15	0	0	0	0.25	0.19	0	0.39	0	0	0	0	0	0	0.13	0	0
Tpi1	0	0	0	0	0.1	0	0	0.46	0	0.1	0	0	0	0	0.15	0	0
Jcad	0.27	0	0	0.28	0	0	0.73	0	0.48	0.01	0.34	0	0	0	0	0.03	0
Chrm1	0.14	0	0	0	0	0.19	0	0.83	0	0	0	0.12	0.61	0.56	0	0	0.97
Ffar4	0	0.69	0.38	0.09	0	0	0.18	0	0.71	0.17	0	0	0	0	0	0.71	0
Sgsh	0.15	0.32	0	0	0	0	0.32	0	0	0	0.16	0.07	0.1	0	0	0.32	0
Pid1	0	0.04	0	0.09	0	0.79	0.47	0	0	0	0.14	0	0	0	0.03	0	0
Rffl	0	0	0.04	0.28	0	0	0.01	0	0	0.05	0	0	0	0	0	0.31	0
Tmprss4	0	0.25	0.29	0	0	0.48	0	0.31	0	0	0	0	0	0	0.9	0.14	0.45
Nedd4l	0.29	0.48	0.36	0.17	0	0.02	0.15	0	0	0	0	0	0	0	0	0.01	0
Tpo	0.24	0	0	0.3	0.91	0	0.13	0.75	0.17	0	0	0	0	0	0	0	0.48
Dlx5	0	0	0	0	0.2	0	0	0	0	0	0	0	0.71	0	0.16	0.98	0
Heatr5a	0	0.14	0.02	0.01	0	0	0	0	0	0	0	0	0	0	0	0.02	0
Irf3	0	0	0	0	0	0.24	0	0.37	0	0	0	0	0	0	0.78	0.13	0.17
Slc6a7	0.3	0.24	0.24	0.02	0.11	0	0	0	0	0	0	0	0	0	0.15	0	0.05
Agfg2	0	0	0	0	0	0.17	0	0.26	0.21	0	0	0	0.12	0.55	0	0	0
9430015G10Rik	0	0.48	0.3	0	0	0	0	0	0	0	0	0	0	0	0	0.17	0
Wdr78	0.07	0.31	0.25	0	0	0	0.06	0	0	0	0	0	0	0	0	0.01	0
Fads3	0	0.38	0	0.57	0	0	0.21	0	0	0	0	0	0	0	0	0.05	0
Prkd2	0	0.09	0.03	0	0	0	0	0	0	0	0.51	0.29	0	0	0	0.17	0
Ccdc17	0	0.77	0.03	0	0	0	0.78	0	0.07	0	0	0	0	0	0	0.69	0
Sppl3	0	0.11	0	0.01	0	0	0.11	0	0	0	0	0	0	0	0	0.04	0
Crbn	0	0.23	0	0	0	0	0.31	0	0	0	0	0	0	0	0	0.06	0
Zc3hc1	0	0.35	0	0	0	0	0.07	0	0	0	0	0	0	0	0	0.08	0
Tubgcp5	0	0	0	0	0.04	0	0	0.04	0	0	0	0	0	0	0.02	0	0.4
Spesp1	0.27	0.59	0.36	0	0	0	0.72	0	0.08	0	0	0	0	0	0	0.43	0
Eri1	0	0.28	0	0.05	0	0	0.34	0	0	0	0	0.03	0.07	0	0	0.42	0
Trmt44	0	0.68	0	0.12	0	0	0.26	0	0	0	0	0	0	0	0	0.37	0
Fhl1	0	0.26	0	0	0	0	0	0	0	0.07	0	0	0	0	0	0.19	0
Lrig1	0	0	0	0	0	0	0	0	0	0	0.84	0.85	0.02	0.06	0	0.09	0
Serpine3	0	0	0	0	0	0.15	0	0.52	0	0	0	0	0	0.16	0.44	0	0.01
Camk2a	0.21	0	0.02	0	0.18	0.1	0	0.17	0	0	0	0	0	0.15	0	0	0.05
Prrxl1	0.92	0	0	0	0	0	0	0.73	0	0	0	0	0	0	0.57	0	0
Pcgf3	0	0.43	0	0	0	0	0	0	0	0	0	0	0	0	0	0.22	0
Wdr6	0.05	0	0	0	0.17	0	0	0.06	0	0	0	0	0	0.08	0	0	0
Gramd1a	0	0	0	0.04	0.1	0	0	0.14	0	0	0	0	0	0.13	0.18	0	0.05
Ankrd28	0	0.06	0	0	0	0	0.13	0	0	0	0	0	0.05	0	0	0.27	0
Ptpn6	0	0.47	0.26	0.09	0	0	0.55	0	0.17	0	0.03	0.16	0	0	0	0.24	0
Zfp819	0	0.86	0.08	0	0	0	0.47	0	0.15	0	0	0	0	0.06	0	0.52	0
Ttc21b	0	0.39	0.32	0.13	0	0	0	0	0	0	0	0	0	0	0	0.09	0
Cast	0	0.45	0	0	0	0	0.17	0	0.14	0.13	0.11	0.33	0.35	0.17	0	0.71	0
Anks1b	0.24	0.25	0.24	0.24	0	0.21	0.25	0	0.24	0.03	0.11	0	0	0.19	0	0.17	0.1
Abracl	0.41	0.12	0.7	0	0	0.24	0	0	0	0	0	0	0.42	0	0	0.08	0.28
Ttll7	0	0.3	0	0	0	0	0.15	0	0	0	0	0.05	0	0	0	0.19	0
Pcyt2	0.07	0	0	0	0.48	0	0	0.72	0	0.15	0	0	0	0	0.41	0	0.12
Slc26a4	0.84	0.17	0	0	0	0.4	0	0.76	0	0.1	0	0	0	0	0	0.4	0
Capn12	0.3	0.72	0.38	0.14	0	0.5	0.31	0	0	0	0	0	0	0	0	0.12	0
Mrpl42	0	0.14	0.16	0	0	0	0	0	0	0	0	0	0	0	0	0.01	0
Hira	0	0.72	0	0.11	0	0	0.29	0	0	0	0	0	0	0	0	0.39	0
Phf1	0	0	0	0.12	0	0	0	0	0	0.03	0	0	0	0	0.04	0	0
B3gnt5	0	0.79	0.44	0	0	0.06	0.37	0	0.12	0	0	0	0	0	0	0.38	0
Zfp82	0	0.72	0	0	0	0	0.78	0	0.06	0	0	0	0	0	0	0.41	0
Taf1d	0	0.39	0	0	0	0	0.07	0	0	0	0	0	0	0	0	0.05	0
Xpo1	0	0.08	0	0	0	0	0	0	0	0	0	0.1	0	0	0	0.09	0
Car1	0	0	0	0.11	0	0.25	0	0.3	0	0	0.35	0	0	0	0.43	0	0.82
Adamts9	0.36	0	0	0	0	0.97	0	1	0.62	0.44	0	0	0	0	0	0	0
Map2k1	0	0	0	0	0	0	0	0	0.03	0	0	0	0	0.38	0.04	0	0.23
Tespa1	0.02	0	0	0	0	0.76	0	0.81	0	0.41	0.15	0	0	0	0.75	0	0
Ttc23l	0	0.72	0	0	0	0	0.37	0	0.17	0.08	0.12	0.24	0	0	0	0.58	0
Tmem132e	0	0	0	0.29	0.56	0	0	0.23	0	0.39	0.43	0	0	0	0.75	0	0.16
Med12l	0	0	0	0	0	0.15	0	0	0.46	0.3	0	0	0	0	0	0.07	0
Sept10	0.22	0	0	0	0.04	0	0	0.84	0	0.02	0	0	0	0.51	0.57	0.11	0
Aup1	0.09	0	0	0	0.37	0	0	0.14	0.08	0.1	0	0	0	0	0.71	0	0.48
Arhgap21	0	0.33	0	0	0	0	0.25	0	0	0	0	0	0	0	0	0.19	0
Mat1a	0	0.76	0.64	0	0	0	0	0	0.11	0	0.13	0	0.05	0	0	0.41	0
Ndrg2	0.13	0	0	0	0.24	0	0	0.45	0	0	0	0	0	0.17	0.19	0	0.41
Jup	0	0.82	0.48	0.04	0	0	0.07	0	0.1	0	0	0	0	0	0	0.11	0
Gatb	0	0.07	0	0	0	0	0.08	0	0	0	0	0	0	0	0	0.33	0
Cmtm8	0	0.61	0.77	0.6	0	0	0.41	0	0.34	0	0	0	0	0	0	0.6	0
Kif6	0	0.41	0	0.33	0	0	0.71	0	0.06	0	0	0	0	0	0	0.39	0
Batf	0	0	0.44	0	0	0.36	0.94	0	0	0.16	0	0	0	0	0	0.2	0
Fam207a	0	0.35	0	0.04	0	0	0.2	0	0	0	0.03	0	0	0	0	0.13	0
Rsbn1l	0	0	0	0	0	0	0	0	0	0	0.09	0.03	0	0	0	0.05	0
Mtus2	0	0.33	0	0	0	0.06	0	0	0	0.16	0	0	0	0	0	0.2	0
Cdhr2	0	0	0	0.51	0.77	0	0	0.67	0.57	0	0	0	0	0	0	0	0
Inpp1	0	0	0	0.03	0	0	0.06	0	0	0	0	0.01	0	0	0	0.46	0
Gabpb1	0	0.17	0	0	0	0	0.05	0	0	0	0	0	0	0	0	0.11	0
Acp6	0	0	0	0	0	0	0	0.6	0	0.17	0	0	0	0.45	0.05	0.02	0.02
Hace1	0	0.12	0.25	0	0	0	0	0	0	0	0	0	0	0	0	0.21	0
Mettl4	0	0.23	0.05	0	0	0	0.55	0	0	0	0	0	0.02	0	0	0.37	0
Tti1	0	0.06	0	0	0	0	0.23	0	0	0	0	0	0	0	0	0.23	0
Frmpd4	0	0	0	0	0	0.23	0	0.13	0.48	0.31	0	0	0.25	0.21	0.45	0.22	0.18
Efna5	0.2	0.19	0.37	0	0.09	0	0	0.26	0	0	0	0.48	0	0.37	0	0.26	0
Tbpl1	0	0.17	0	0	0	0	0.17	0	0	0	0	0	0	0	0	0.28	0
Zdhhc23	0.14	0	0.41	0	0.3	0.18	0	0.66	0.02	0	0	0	0	0	0	0	0
Cfap58	0	0.3	0	0	0	0	0.03	0	0	0.1	0.8	0	0	0.12	0	0.44	0
P2ry1	0	0.72	0.23	0	0	0	0	0	0	0	0	0	0.3	0	0	0.06	0.83
Yjefn3	0	0.18	0	0	0	0	0	0	0	0	0	0.03	0	0	0	0.03	0
Trim67	0.17	0.01	0.03	0.23	0	0	0	0	0	0	0.32	0	0	0	0	0.17	0
Exoc3	0	0	0	0	0.19	0	0	0.21	0	0	0	0	0	0	0.16	0	0.3
Acap2	0	0.33	0	0	0	0	0.17	0	0	0	0	0.11	0.08	0	0	0.28	0
Psmb4	0	0.24	0	0	0	0	0.2	0	0	0	0	0.02	0	0	0	0.03	0
Krtcap2	0.02	0	0	0	0	0	0	0.34	0	0	0.22	0	0	0	0.07	0	0.38
Wdr35	0	0.17	0	0	0	0	0	0	0	0	0	0	0	0	0	0.11	0
Rmnd1	0	0.22	0	0.02	0	0	0.03	0	0	0	0	0	0	0	0	0.1	0
Col18a1	0.88	0.91	0.4	0.1	0.89	0	0	0	0	0	0	0	0	0	0	0	0
Cox8a	0	0	0	0	0.3	0	0	0.63	0	0	0.11	0	0	0	0.42	0	0.55
Prkcq	0.7	0.29	0.02	0.5	0	0	0.34	0	0.12	0	0	0	0	0	0	0.71	0
Eloc	0	0	0	0	0.22	0.11	0	0.46	0	0	0	0	0	0	0.33	0	0.73
Mrpl41	0.01	0	0	0.12	0.2	0	0	0.8	0	0	0	0	0	0	0.53	0	0.07
Ptprc	0	0.83	0.5	0	0	0	0	0	0	0	0	0	0	0	0	0.42	0
Htr7	0.91	0.21	0	0.65	0.5	0	0.67	0	0.4	0	0	0	0	0	0	0.1	0
Wdr20	0	0.05	0	0	0	0	0	0	0	0	0	0.1	0	0	0	0.1	0
Synpr	0	0.75	0.82	0	0	0.15	0	0	0	0	0	0	0	0.6	0.53	0.59	0
Zfp444	0	0	0.01	0	0.21	0	0	0.29	0	0	0	0	0	0	0.04	0	0
Zfp536	0	0	0	0	0	0	0.78	0	0	0	0.79	0.89	0	0	0	0.89	0.03
Gtf2h2	0	0.19	0	0	0	0	0.13	0	0	0	0	0	0	0	0	0.15	0
Hras	0	0	0	0	0	0	0	0.28	0	0	0.01	0	0	0	0.05	0	0
Tinf2	0	0.55	0	0.04	0	0	0.24	0	0.04	0	0	0	0	0	0	0.33	0
Eif3e	0	0.02	0	0	0	0	0.02	0	0	0	0	0	0.03	0	0	0.14	0
Rasgrp2	0.58	0.02	0	0.7	0.43	0.04	0.1	0	0	0	0	0	0	0	0.39	0.08	0.42
Ilf2	0.23	0	0	0	0.22	0	0	0.39	0	0	0	0	0	0	0.23	0	0
Naa60	0	0.8	0	0.09	0	0	0.8	0	0.07	0	0.08	0.05	0	0	0	0.74	0
Sez6l2	0	0.2	0.18	0	0	0	0.02	0	0	0	0	0	0	0	0	0	0
Smarcc1	0	0.02	0.07	0	0	0	0	0	0	0	0	0	0	0	0	0.08	0
Bcl11a	0.58	0.8	0.8	0	0	0.78	0	0.71	0	0	0	0	0	0.22	0.04	0	0
Mpdz	0	0.3	0	0	0	0	0.12	0	0.06	0	0.31	0.12	0	0	0	0.24	0
Fam168a	0.2	0.09	0	0.2	0	0.19	0.19	0.08	0	0	0	0	0	0.03	0	0.04	0
Akap10	0	0	0	0.16	0	0	0	0	0	0	0	0	0	0	0	0	0
Fstl5	0.5	0.32	0.27	0.31	0	0	0	0	0	0	0.09	0	0	0	0	0.6	0
Cep192	0	0.4	0.03	0	0	0	0.15	0	0	0	0	0	0	0	0	0.51	0
Tpr	0.03	0	0	0	0	0	0	0.22	0	0	0	0	0	0	0.16	0	0.05
Nphp4	0	0.21	0	0	0	0	0	0	0	0	0	0	0	0	0	0	0
Mapk9	0	0.34	0	0.1	0	0	0.19	0	0	0	0	0	0	0	0	0.11	0
Phtf2	0	0.17	0	0	0	0	0	0	0	0	0	0	0	0	0	0.16	0
Inpp5b	0	0.02	0	0.07	0	0	0	0	0	0	0	0	0	0	0	0.08	0
Wnt5a	0	0	0	0	0	0	0.33	0	0.55	0	0.89	0	0	0.54	0	0	0.92
Wsb1	0	0.12	0	0	0	0	0	0	0.08	0	0.03	0.07	0.14	0	0	0.11	0
Gps2	0	0	0	0	0.29	0	0	0.33	0	0	0	0	0	0	0.26	0	0.01
Piezo2	0.53	0.96	0.88	0	0	0	0	0	0	0	0	0.03	0	0	0	0.21	0
Sstr1	0	0	0	0	0.04	0	0.75	0.75	0.06	0	0	0	0	0	0	0	0.72
Ttc22	0	0.79	0.14	0	0	0.12	0	0	0	0	0	0	0.23	0	0	0	0
Epdr1	0	0.01	0	0	0	0	0.05	0	0	0	0.1	0	0	0	0	0.3	0
Hyls1	0	0.54	0.08	0.08	0	0	0.17	0	0	0	0	0	0.02	0	0	0.27	0
Ttll11	0	0.13	0	0	0	0	0.19	0	0	0	0	0	0	0	0	0.16	0
Rcan1	0.08	0	0	0	0.5	0.1	0	0.33	0	0	0	0	0	0	0.01	0	0.62
Zmym2	0	0.27	0.06	0.12	0	0	0.17	0	0	0	0	0	0	0	0	0.13	0
Sparcl1	0	0	0	0	0.09	0	0	0.39	0	0	0.16	0.35	0	0	0.08	0	0.52
Epha6	0	0.16	0.17	0.82	0.63	0	0.28	0	0	0.08	0	0	0.2	0	0.22	0.28	0
Ptgdr	0.91	0.15	0.85	0	0.61	0	0	0	0	0	0	0	0	0	0	0	0.53
Slk	0	0	0	0	0	0	0	0	0	0	0.04	0	0.02	0.16	0	0.07	0
Setdb2	0.37	0.53	0.89	0.05	0	0	0.22	0	0	0	0	0	0	0	0	0.11	0
Atp13a5	0.08	0	0	0	0.26	0	0	0	0	0.01	0	0	0.17	0.43	0.05	0	0
Ppm1k	0	0.61	0	0	0	0	0.19	0	0	0	0.04	0.1	0	0	0	0.33	0
Cecr2	0.88	0.22	0.45	0.2	0	0	0.07	0	0	0	0	0	0	0	0	0.43	0
Rpn2	0	0	0	0	0.06	0	0	0.03	0	0	0.05	0	0	0	0.01	0	0.18
Csgalnact2	0	0.44	0.1	0	0	0	0.23	0	0	0	0.01	0.03	0	0	0	0.56	0
Prkar1b	0	0.19	0	0.14	0	0.05	0.2	0	0	0	0	0	0	0	0	0.14	0
Neto2	0.79	0.24	0.46	0	0	0	0	0	0	0.35	0.28	0	0	0	0	0.45	0
Prkg1	0.23	0.25	0.24	0	0	0.24	0.24	0	0.15	0	0.19	0	0	0	0	0.24	0.14
Ttyh1	0	0	0	0	0.07	0.14	0	0.61	0	0.11	0	0	0	0.1	0.52	0	0.37
Prkar1a	0	0	0	0	0.06	0	0	0.02	0	0.07	0.12	0	0	0	0	0	0.05
Rxfp2	0	0.56	0.06	0	0	0.01	0.29	0	0.28	0.61	0	0.18	0	0	0	0.07	0
Slit2	0	0.25	0	0	0	0.44	0.2	0.23	0.75	0.47	0	0	0	0	0	0.25	0
Srsf6	0	0.1	0	0	0	0	0.01	0	0	0	0	0	0	0	0	0.05	0
Efhc2	0	0.62	0	0	0	0	0	0	0.05	0.01	0	0	0.38	0	0	0.25	0
Eml4	0.04	0.16	0.12	0	0	0.13	0.03	0	0	0	0	0	0	0	0	0.17	0
Glb1	0	0	0	0	0	0	0	0	0	0	0	0	0	0	0	0.09	0
Wbp2nl	0.53	0.64	0	0	0	0.44	0.04	0	0.43	0.1	0.17	0	0	0	0	0	0
Ptk2	0.04	0.27	0	0	0	0	0.16	0	0	0	0	0.13	0.01	0	0	0.24	0
Taldo1	0	0.25	0	0	0	0	0	0	0	0	0	0	0	0	0	0.04	0
Parn	0.08	0.46	0.15	0	0	0	0	0	0	0	0	0	0	0	0	0.12	0
Fhod3	0	0	0	0	0	0.02	0	0	0.09	0.25	0.37	0	0	0.14	0	0.16	0
Nup214	0	0.38	0	0	0	0	0.18	0	0	0	0	0	0	0	0	0.31	0
Ei24	0	0	0	0	0.34	0.03	0	0.45	0	0	0	0	0	0	0	0	0.03
Inpp5f	0.15	0.32	0	0.17	0	0	0.24	0	0	0	0	0.05	0	0	0	0.09	0
Gpatch8	0	0.06	0	0	0	0.1	0.22	0	0.09	0.18	0.05	0	0.08	0	0	0.22	0
Tprgl	0	0	0	0	0	0	0	0.23	0.1	0.44	0	0	0	0	0.85	0	0.3
Ap3m1	0	0	0	0	0	0.29	0	0.6	0	0	0	0	0	0	0.38	0	0.3
Zfp473	0	0.69	0.1	0	0	0	0.52	0	0	0.16	0.07	0	0	0	0	0.34	0
Tnfaip3	0	0.71	0.81	0	0	0	0	0	0	0	0	0	0	0	0	0.48	0
Atp8b2	0	0.57	0	0	0	0	0.37	0	0.04	0	0	0	0	0	0	0.29	0
Ppat	0	0.45	0.63	0	0	0	0.02	0	0	0	0	0	0	0	0	0.04	0
Ahcyl1	0	0	0	0	0.08	0	0	0.01	0	0	0	0	0	0	0.16	0	0
Tnks2	0.12	0	0	0	0.2	0	0	0.06	0	0	0	0	0.06	0	0	0	0
Trim69	0	0.34	0	0	0	0.04	0.57	0	0	0	0.09	0.22	0.72	0	0	0	0
Lamtor2	0	0	0	0	0.5	0	0	0.31	0	0	0	0	0	0	0.32	0	0.54
Mmp24	0	0	0	0	0	0	0	0.31	0	0	0	0	0	0	0	0	0
Vps13d	0.06	0.12	0	0	0	0.06	0	0	0	0	0	0	0	0	0	0.12	0
E130311K13Rik	0	0.1	0	0	0	0	0.1	0	0	0.01	0	0.1	0	0	0	0.11	0
Sart3	0	0.38	0.01	0	0	0	0.14	0	0	0	0	0	0	0	0	0.09	0
Abo	0.05	0.94	0	0.42	0	0	0.95	0	0	0	0	0	0	0	0	0.68	0
Plxdc2	0	0	0.07	0.47	0.13	0	0.25	0	0	0	0.22	0	0.32	0	0	0.24	0
Net1	0	0.21	0.3	0	0	0	0	0	0.25	0	0.15	0.07	0	0	0	0.27	0
Dhcr7	0.36	0	0	0	0.21	0.03	0	0.32	0	0.29	0	0	0	0	0.25	0	0
Rnf180	0	0.04	0	0	0	0	0	0	0	0.02	0	0	0	0	0	0.1	0
Glmp	0	0	0	0	0.07	0.22	0	0.35	0	0.13	0.19	0	0	0	0.5	0	0.63
Gpatch2l	0	0.26	0	0.09	0	0	0.38	0	0	0	0	0	0	0	0	0.4	0
Chpt1	0.03	0	0	0	0.04	0	0	0.09	0	0	0	0	0	0	0.01	0	0
Zfp1	0	0	0	0	0.2	0.11	0	0.12	0	0	0	0	0	0	0.22	0	0
Nfs1	0	0	0	0	0.13	0	0	0.36	0	0	0	0	0	0	0.18	0	0
Col6a1	0	0	0	0	0	0	0	0	0	0	0.49	0.99	0.81	0	0	0.25	0
Fras1	0.05	0.1	0	0.76	0	0	0.99	0	0	0	0	0	0.38	0	0	0.64	0
Ctdspl	0	0	0	0	0	0.08	0.1	0.08	0	0	0	0	0	0.14	0	0	0
Spef2	0	0.42	0	0.07	0	0	0.49	0	0.03	0	0	0	0.01	0	0	0.49	0
Pde4a	0.34	0.08	0.05	0.54	0	0.2	0.14	0	0	0	0	0	0	0	0	0	0
Amz2	0	0.53	0.1	0	0	0	0.13	0	0	0	0	0	0	0	0	0.36	0
Btbd10	0	0.12	0.03	0	0	0	0	0	0	0	0	0	0.1	0	0	0.13	0
Ctbs	0	0	0	0	0.47	0.04	0	0.33	0	0	0	0	0	0	0.47	0	0.24
Paxip1	0	0.28	0	0	0	0	0	0	0	0	0	0	0	0	0	0.1	0
Smchd1	0	0.14	0.07	0.07	0	0	0.13	0	0	0	0	0	0	0	0	0.26	0
6430628N08Rik	0.92	0	0	0	0	0.91	0	0.57	0.62	0	0	0	0	0	0	0	0
Utp6	0	0.23	0.17	0	0	0	0.22	0	0	0	0	0	0	0	0	0.36	0
St18	0	0	0	0	0	0	0	0	0.99	0.21	0.91	0	0	0	0	0.45	0
Arl15	0.09	0.15	0.05	0.22	0	0.22	0.2	0	0	0	0	0	0.08	0.34	0	0.13	0
Tarsl2	0	0.43	0	0	0	0	0.37	0	0.02	0	0	0	0	0	0	0.29	0
Zfyve1	0	0	0	0	0.35	0	0	0.46	0.06	0	0	0	0	0	0.06	0	0
Nacc2	0.28	0.08	0.47	0	0	0	0	0	0	0	0	0	0	0	0.32	0	0
Chrm5	0	0.11	0	0	0	0	0	0	0.72	0.15	0	0.28	0.45	0	0.18	0.22	0
Alg2	0	0	0	0	0.25	0	0	0.29	0	0	0.29	0	0	0	0	0	0.43
Tmem59	0	0	0	0	0.24	0.03	0	0.4	0	0	0.13	0	0	0	0.22	0	0.21
Rcsd1	0	0	0	0	0	0	0	0	0.74	0.85	0.09	0	0	0.15	0	0.38	0
Clcn6	0	0.1	0	0.05	0	0	0.24	0	0	0	0	0	0.01	0	0	0	0
Chchd7	0	0	0	0	0.59	0	0	0.44	0	0	0	0	0	0	0.4	0	0.67
Otulin	0	0	0	0	0.14	0.22	0	0.21	0	0	0	0	0	0	0.02	0	0.06
Emilin1	0	0.69	0	0.21	0	0	0.37	0	0.3	0	0	0	0	0	0	0.33	0
Cpeb4	0	0.13	0	0	0	0	0.02	0	0	0	0	0	0	0	0	0.16	0
Epn2	0	0.08	0	0	0	0	0.02	0	0	0.15	0	0	0	0	0	0.1	0
Spon1	0.01	0.06	0.56	0.03	0	0	0.1	0	0	0	0.65	0	0	0.05	0	0	0
Laptm4a	0	0	0	0	0.11	0	0	0.28	0	0	0.19	0	0	0	0.18	0	0.26
Sh3bgrl2	0.12	0.76	0	0	0	0	0.3	0	0.29	0	0	0	0	0	0	0.39	0
Lrba	0	0	0.1	0	0	0	0	0.1	0	0	0	0.04	0.14	0.13	0	0.01	0
Mphosph9	0	0.21	0.06	0	0	0.02	0	0	0	0	0	0	0	0	0	0	0
Ly6d	0	0	0	0	0	0	0.23	0	0.22	0	0	0	0	0	0	0	1
Dnali1	0	0.58	0.02	0	0	0	0.68	0	0	0	0.21	0.18	0	0	0	0.14	0
Tex22	0	0.42	0	0	0	0.12	0.24	0	0.07	0	0	0	0	0	0	0.38	0
Appl2	0	0.42	0.42	0	0	0	0.63	0	0	0	0	0	0	0	0	0.05	0
E130308A19Rik	0.02	0.16	0	0	0	0	0	0.02	0	0	0	0	0	0	0	0.08	0
Gcc2	0	0.15	0	0	0	0	0	0	0	0	0	0.08	0.08	0	0	0.26	0
Cwc27	0	0	0	0	0.08	0	0	0	0	0	0.11	0.18	0	0.16	0.14	0	0
D430041D05Rik	0.06	0.29	0.22	0	0	0.22	0.2	0.09	0	0	0	0	0	0	0	0	0
Ephx3	0	0.79	0.08	0.24	0	0	0.49	0	0.18	0.14	0	0	0	0	0	0	0
Plekhm1	0.23	0.19	0.18	0	0	0.1	0	0	0	0	0.07	0	0	0	0	0.13	0
Ssh2	0.02	0.17	0	0.12	0.07	0	0.21	0	0.06	0	0	0.02	0	0	0	0.11	0
Mapk10	0.2	0.23	0	0	0	0.11	0.23	0	0.16	0	0.04	0	0	0	0	0.21	0
Tgfbr2	0	0.24	0	0.11	0	0	0.57	0	0	0.1	0	0	0	0	0	0.85	0
Ppp2r3a	0.14	0	0.14	0.09	0	0	0	0.04	0	0	0.01	0	0	0	0.01	0	0
Mvb12b	0	0.27	0.15	0	0	0	0.08	0	0	0	0	0	0	0	0	0.07	0
Mcm9	0	0	0	0	0	0	0.12	0	0	0	0.05	0.02	0	0	0	0.35	0
1700019D03Rik	0	0	0	0	0	0	0	0	0	0	0	0.33	0.6	0	0.12	0.23	0
Aacs	0	0.21	0.02	0	0	0	0	0	0	0	0	0	0	0	0	0.1	0
Rassf8	0	0	0	0	0.18	0.07	0	0.36	0	0.32	0	0	0.31	0.09	0.15	0	0.13
Ift43	0	0.01	0	0.04	0	0	0.03	0	0	0	0	0	0	0	0	0.06	0
Zfp451	0	0.2	0	0	0	0	0.13	0	0	0	0	0	0	0	0	0.23	0
Ano7	0	0.59	0.34	0.76	0	0	0.44	0	0	0	0	0	0	0	0	0.45	0
Chpf	0.03	0	0	0.03	0.26	0	0	0.06	0	0	0.15	0	0	0	0.04	0	0.06
Igsf9	0.46	0	0.16	0.36	0.57	0	0	0	0	0.38	0	0	0	0	0	0	0.4
Opa1	0	0.23	0	0.02	0	0	0.11	0	0	0	0	0	0	0	0	0.24	0
Galnt7	0.08	0.52	0	0	0	0	0	0	0	0	0	0	0	0.28	0	0	0
Tuft1	0	0.28	0.07	0	0	0	0.08	0	0	0	0.4	0	0	0	0	0.61	0
Nlk	0	0.14	0.12	0.19	0	0.16	0	0	0	0	0	0	0	0	0	0.19	0
Bsn	0	0	0	0	0.25	0.28	0	0.52	0	0	0	0	0	0.13	0.37	0	0.22
Mt3	0	0	0	0	0.25	0.03	0	0.78	0	0.16	0.04	0	0	0	0.31	0	0.53
Bicc1	0	0	0	0	0	0	0	0	0.24	0.23	0.04	0.24	0.14	0	0	0.03	0
Hsd17b2	0	0	0	0	0	0.36	0.41	0.98	0.38	0.47	0	0	0	0.37	0	0	0
Lhfpl3	0	0	0	0	0	0.24	0.24	0.3	0.24	0.24	0	0	0.22	0.24	0	0.23	0
Mamdc2	0.11	0.82	0.29	0.19	0	0	0.44	0	0.18	0	0	0.1	0	0	0	0.53	0
Ttc9b	0.14	0	0	0.04	0	0	0	0	0	0.01	0	0	0	0.14	0.09	0	0.79
Cth	0	0.13	0	0.48	0	0	0.1	0	0	0	0.45	0.11	0	0	0	0.8	0
Mlip	0	0	0	0	0.37	0	0	0.21	0.55	0	0.76	0	0	0	0	0.11	0.03
Tcaf2	0.27	0.49	0.83	0	0	0	0	0	0	0	0	0	0	0	0	0.66	0
Whrn	0.53	0	0	0	0	0.16	0	0.41	0.66	0	0.88	0	0	0	0	0	0.15
Dcun1d3	0	0	0	0	0	0	0	0	0	0	0	0	0	0	0	0.25	0
Trp53	0	0	0	0	0.36	0.05	0	0.54	0.08	0	0	0	0	0	0.44	0	0.14
Fasn	0	0	0	0	0	0.19	0	0.87	0	0	0	0	0	0	0.44	0	0
Csnk2a1	0	0.35	0	0	0	0	0.1	0	0	0	0	0	0	0	0	0.13	0
Cherp	0	0	0	0	0.38	0.02	0	0.27	0	0	0	0	0	0	0	0	0
Exoc7	0	0.18	0	0	0	0	0	0	0	0	0.01	0	0	0	0	0.08	0
Pml	0	0.19	0	0.1	0	0	0.25	0	0	0	0	0	0	0	0	0.42	0
Vps50	0	0	0	0	0	0.11	0	0.21	0	0	0	0	0	0	0	0	0
Spry4	0	0.11	0	0.08	0	0	0	0	0	0	0.84	0.36	0	0	0	0.95	0
Rab24	0.07	0	0	0	0	0.01	0	0.42	0.05	0.08	0	0	0	0	0.05	0	0
Map4k3	0	0.26	0.12	0	0	0	0.13	0	0	0	0	0.11	0	0	0	0.33	0
Klk14	0	0.55	0.05	0	0	0.1	0.13	0	0.26	0.24	0	0.19	0	0	0	0.55	0
Rhoj	0.24	0	0.06	0	0.96	0	0	0	0.11	0	0	0.05	0	0	0	0.12	0
Zfp697	0.01	0	0	0	0.32	0.5	0	0.81	0	0	0	0	0	0	0.27	0	0.09
Ddhd2	0	0	0	0	0.22	0.15	0	0.38	0	0	0	0	0.03	0	0.26	0	0.32
Rps6kc1	0	0.34	0	0	0	0	0.15	0	0.06	0	0	0	0	0	0	0.24	0
Plod2	0	0.34	0	0	0	0	0.62	0	0	0	0	0.13	0.06	0	0	0.79	0
Dpysl3	0	0	0	0	0.09	0	0	0	0	0	0	0.32	0.13	0	0.4	0	0.62
Mesd	0	0	0	0	0.31	0	0	0.18	0.08	0	0	0	0	0	0	0	0
Cyb5d2	0	0.25	0	0	0.11	0	0.08	0	0	0	0	0	0	0	0	0.14	0
Taf4	0	0.04	0	0.03	0	0	0.11	0	0	0	0	0	0	0	0	0.08	0
Gls	0	0	0	0	0	0.06	0.16	0.09	0.12	0	0	0	0.13	0.04	0	0	0
Bcat2	0	0.09	0.03	0	0	0	0.04	0	0.04	0	0	0	0	0	0	0.29	0
Cnot6l	0	0	0	0	0	0	0	0	0	0	0	0	0	0	0	0.15	0
P2rx4	0	0.18	0	0	0	0	0.03	0	0	0	0	0	0	0	0	0.08	0
Akip1	0	0.65	0.42	0.14	0	0	0.32	0	0	0	0	0.03	0	0	0	0.53	0
Birc3	0	0.93	0.83	0	0	0	0	0	0	0	0	0	0	0	0	0.3	0
Atg4c	0	0.29	0	0	0	0	0	0	0	0	0	0	0	0	0	0.18	0
Ltn1	0	0.07	0	0	0	0	0	0	0	0	0	0	0	0	0	0.1	0
Arl6ip5	0	0	0	0	0	0	0	0.14	0	0	0	0	0	0	0	0	0.03
Fndc4	0	0	0	0	0.33	0	0	0.46	0	0	0	0	0	0	0.02	0	0.16
Pstpip1	0.17	0	0	0	0	0.46	0	0.56	0.74	0.25	0	0	0	0	0	0	0
Cenpw	0	0.75	0	0	0	0.15	0	0	0	0	0.25	0	0.29	0	0	0.53	0
Nqo1	0.13	0.31	0.17	0	0	0	0.48	0	0	0	0	0	0	0	0	0.38	0
Tecr	0.15	0	0	0	0.26	0.03	0	0.54	0	0.11	0.13	0	0	0	0.38	0	0.5
Ackr3	0.81	0	0	0	0	0.45	0	0.9	0.36	0.52	0.13	0	0	0	0	0	0
2510009E07Rik	0	0.43	0.02	0	0	0.07	0	0	0	0	0	0	0	0	0	0.19	0
Hells	0.38	0.55	0.52	0	0	0	0	0	0	0	0	0	0	0	0	0.14	0
Fam104a	0	0	0	0	0.15	0	0	0.35	0	0	0	0	0	0	0.74	0	0.07
Cmtr1	0	0.69	0	0.03	0	0	0.43	0	0.06	0	0	0	0.01	0	0	0.39	0
Slc7a8	0	0	0	0	0	0.31	0	0.54	0.29	0.08	0	0	0	0	0.63	0.13	0.12
Mre11a	0	0.47	0.75	0	0	0.01	0	0	0	0	0	0	0	0	0	0	0
Bank1	0	0.24	0	0	0	0	0.31	0	0.29	0.23	0	0.11	0.4	0	0	0.46	0
Pcsk7	0.03	0	0	0	0.05	0	0	0.23	0	0	0	0	0	0	0	0	0
Zbtb43	0	0.2	0	0	0	0	0.02	0	0	0	0	0	0.05	0	0	0.1	0
Mrpl23	0.04	0	0	0	0	0	0	0.46	0	0	0	0	0	0	0.01	0	0.2
Col12a1	0.99	0.04	0	0.2	0	0	0	0	0	0	0	0	0.7	0.04	0	0.15	0
Ccdc82	0	0	0	0.04	0.03	0	0	0.02	0	0	0.12	0.04	0	0	0.04	0.05	0
Tgds	0	0.23	0.05	0	0	0	0	0	0	0	0	0.13	0	0	0	0.34	0
Slc27a2	0	0	0	0	0.49	0.06	0	0.51	0	0.08	0.15	0	0	0	0.6	0	0.33
Cttnbp2	0	0.09	0	0	0	0.36	0.18	0.33	0.29	0.2	0	0	0	0	0.19	0.13	0
Pias4	0	0	0	0	0	0.06	0	0.24	0.05	0	0	0	0	0	0.38	0	0
Fam122c	0	0.9	0.4	0	0	0	0.34	0	0	0	0	0.5	0.12	0	0	0.61	0
Slc25a25	0	0.26	0	0	0	0	0	0	0	0	0	0	0	0	0	0.25	0
Stxbp3	0	0.24	0	0	0	0	0.2	0	0	0	0	0	0.11	0	0	0.4	0
Pcnx2	0	0.34	0	0	0	0	0.33	0	0	0	0	0	0	0	0	0.22	0
Ryk	0	0.2	0	0	0	0	0	0	0	0	0	0.09	0	0	0	0.07	0
Elk3	0	0.72	0	0	0	0	0.13	0	0.49	0.05	0	0.01	0	0	0	0.09	0
Klhdc10	0.18	0	0	0.18	0.03	0.2	0.15	0.16	0	0	0	0	0	0	0.04	0	0.04
Slc39a10	0	0.37	0	0	0	0	0.67	0	0	0	0	0	0	0	0	0.28	0
Dennd4c	0	0	0	0	0	0	0.1	0	0	0.06	0	0	0.32	0.16	0	0	0
Dusp27	0.27	0	0	0	0.95	0	0.12	0	0.36	0	0	0	0	0.82	0	0	0.45
Stox2	0	0.04	0	0	0	0.09	0	0	0.01	0.1	0	0.2	0.15	0.05	0	0.08	0
Prlr	0.8	0.62	0.56	0.39	0	0.08	0.49	0	0	0	0	0	0.01	0	0	0.16	0
Slc25a12	0	0.21	0.15	0	0	0	0.05	0	0	0	0	0	0	0.1	0	0	0
Ap2a2	0	0.01	0	0	0	0	0	0	0	0	0	0.08	0	0	0	0.08	0
Psd2	0	0	0	0	0.02	0	0	0	0.02	0	0	0	0	0	0	0	0
Ttc4	0	0	0	0	0.57	0	0	0.23	0	0	0.06	0	0	0	0.17	0	0.36
Ptpn5	0	0.06	0	0	0	0	0	0	0	0	0.19	0.26	0.28	0	0	0.17	0
Dip2b	0.19	0.14	0	0	0	0	0.07	0.07	0.06	0	0	0	0	0	0	0.16	0
Kif21b	0	0.18	0	0	0	0	0.04	0	0	0	0	0	0	0	0	0	0
Cachd1	0.04	0.04	0	0	0	0.23	0	0	0	0	0.83	0.2	0	0	0.64	0	0.41
Asic2	0.12	0	0	0.11	0.3	0.16	0	0.49	0	0.08	0.19	0	0.2	0.22	0.24	0	0.21
Gpr85	0.34	0	0	0	0.13	0.11	0	0.63	0	0	0	0	0	0	0.03	0	0
Fxr2	0.01	0	0	0	0	0	0	0.25	0	0	0	0	0	0	0.09	0	0.05
Sox4	0	0.04	0.11	0.02	0.49	0	0.16	0	0	0	0	0.01	0	0	0	0.1	0
Matk	0.12	0	0	0	0.31	0.32	0	0.55	0	0.25	0	0	0	0.08	0.32	0	0.47
Capn6	0.04	0	0	0	0.91	0	0	0.38	0	0	0	0	0	0	0.51	0.1	0.77
Osbpl10	0	0.48	0.24	0.41	0	0.14	0.26	0	0	0	0	0	0	0	0	0.22	0
Sgms2	0	0	0	0	0	0	0	0	0	0	0	0.21	0	0	0	0.51	0
Tmem268	0.44	0.65	0.47	0	0	0	0.2	0	0	0	0	0.08	0	0	0	0.22	0
Rttn	0	0.17	0	0	0	0	0.11	0	0	0	0	0	0	0	0	0.09	0
Il18r1	0	0	0	0	0	0.42	0	0	0.94	0.74	0	0	0	0	0	0.51	0
Acvr2a	0	0.21	0	0	0	0.32	0.4	0	0	0	0	0	0	0.34	0	0	0
Nt5e	0.26	0	0	0.14	0	0	0	0.02	0	0	0	0	0	0.8	0.06	0	0.05
Cep70	0	0.47	0.08	0	0	0	0.12	0	0	0	0	0	0	0	0	0.05	0
Inf2	0	0.93	0.44	0.33	0	0.09	0.79	0	0	0	0	0	0	0	0	0.35	0
Edaradd	0	0.1	0	0	0	0	0.2	0	0	0.52	0	0	0.38	0.88	0	0.44	0.1
Vps8	0	0.5	0.22	0	0	0	0.33	0	0	0	0	0	0	0	0	0.27	0
Nxpe4	0.15	0	0	0	0.34	0	0	0.97	0.45	0.18	0	0	0	0	0.39	0	0
Gpx6	0	0	0	0	0	0	0	0.8	0.66	0.6	0	0	0	0	0	0	0.7
Dbnl	0	0.41	0	0	0	0	0.01	0	0	0	0	0	0	0	0	0.03	0
Flcn	0	0.26	0	0	0	0	0	0	0.03	0.28	0.08	0	0	0	0	0.07	0
Clic5	0.01	0.5	0.25	0.86	0	0	0.76	0	0	0	0.23	0	0	0.12	0	0.03	0
Fam135a	0	0.2	0.15	0.13	0	0	0.11	0	0	0	0	0	0	0	0	0.18	0
Zfp385b	0.41	0	0.46	0	0	0	0	0.12	0	0	0	0	0.53	0.06	0.94	0	0.19
Ccdc30	0.13	0.01	0	0	0	0.04	0	0.23	0	0	0	0	0	0	0	0	0
Stk33	0	0	0	0.15	0.18	0	0	0	0.04	0	0	0	0	0	0.29	0.09	0.32
Zfp57	0.05	0	0.52	0.3	0.87	0	0	0.83	0	0	0	0	0	0	0.18	0.06	0.05
Lgr5	0	0	0	0	0	0	0	0	0.66	0	0.96	0.55	0	0	0	0	0.52
Man2c1	0	0.11	0	0	0	0	0.05	0	0	0	0	0	0	0	0	0.27	0
Dmd	0	0	0	0.24	0.22	0.19	0	0.27	0.23	0.21	0	0	0.36	0	0.18	0.13	0
Nol7	0	0.24	0	0	0	0	0.17	0	0	0	0	0.04	0.01	0	0	0.09	0
Fuca1	0	0	0	0	0	0.39	0	0.36	0.3	0.63	0	0	0	0	0.19	0	0
Polr2b	0.17	0.22	0	0	0	0	0.05	0	0	0	0	0.01	0	0	0	0.05	0
Dhx8	0	0.18	0	0	0	0	0.08	0	0	0	0	0	0	0	0	0.05	0
Grap2	0.4	0.19	0.89	0	0.14	0.55	0	0	0	0	0	0	0	0	0	0	0
Usp33	0	0.1	0	0	0	0	0.15	0	0	0	0	0	0	0	0	0.13	0
Ajap1	0.12	0.42	0.13	0	0	0.44	0.11	0.36	0	0	0	0	0	0.17	0	0	0
Jam3	0	0.2	0	0	0.04	0.17	0	0.06	0.04	0.08	0	0	0	0	0	0	0
Slc38a2	0	0	0	0.09	0.03	0.12	0	0.6	0	0	0	0	0	0	0.16	0	0.08
Gas2	0	0.08	0	0	0	0.08	0.39	0	0	0	0	0	0	0	0	0	0
Slc25a43	0	0.59	0.06	0.2	0	0	0.7	0	0	0	0	0.08	0	0	0	0.51	0
Ppp1r15a	0	0.43	0	0.07	0	0	0.1	0	0	0	0	0.25	0	0	0	0.28	0
Atg16l1	0	0	0	0	0	0.17	0	0.33	0	0	0	0	0	0	0.13	0	0.06
Usp32	0	0.17	0.11	0.16	0	0.07	0.08	0	0	0	0	0	0	0	0	0.17	0
Spata7	0.01	0	0	0	0	0.06	0	0.42	0	0	0	0	0	0	0.19	0	0.32
Nkpd1	0	0.9	0.27	0	0	0	0.73	0	0.16	0	0	0	0	0	0	0.64	0
Tmem143	0	0.33	0	0	0	0.18	0	0	0	0	0	0	0	0	0	0.14	0
Npy5r	0.93	0	0	0	0.08	0	0	0.33	0.62	0.23	0	0	0	0	0.52	0.06	0.21
Ap4e1	0	0.18	0	0.01	0	0	0	0	0	0	0	0	0	0	0	0.04	0
Unc5c	0.21	0	0	0	0	0.15	0.09	0.34	0.34	0.24	0.3	0	0	0	0	0	0
Plch2	0	0	0	0	0.73	0.34	0.14	0.72	0	0.19	0	0	0	0	0.61	0	0.38
Srsf11	0	0.14	0	0.17	0	0	0.17	0	0.09	0	0	0	0.12	0	0.1	0.09	0
Hapln2	0.23	0.77	0.61	0	0	0	0	0	0	0	0	0.13	0	0	0	0.16	0
Slc16a6	0.01	0.36	0.87	0.08	0	0	0	0	0	0	0	0	0	0	0.05	0.16	0
Ctu1	0	0.55	0	0.08	0	0	0.4	0	0.1	0	0.09	0.04	0.02	0	0	0.4	0
Nr5a1	0	0	0	0	0	0.47	0	0.52	0.65	0.71	0.61	0.47	0.13	0.01	0.53	0	0
Onecut1	0.72	0	0	0.97	0	0	0.92	0	0	0	0	0	0	0	0	0.44	0
Bicd1	0.11	0.14	0	0	0	0.12	0.2	0.05	0.06	0	0	0	0	0	0	0.14	0
Ccdc88a	0	0.19	0	0.18	0	0	0.2	0	0	0	0	0	0	0	0	0.22	0
Wipf2	0	0.37	0.02	0.04	0	0	0.18	0	0	0	0	0	0	0	0	0.23	0
Dnhd1	0	0.08	0	0.23	0	0	0.3	0	0	0.14	0	0	0	0	0	0.13	0
Mpc1	0	0	0	0.01	0	0	0	0.03	0	0.05	0	0	0	0	0.12	0	0.12
Daam2	0	0.02	0	0	0.65	0	0.31	0	0	0.14	0	0	0	0.16	0	0.51	0
Ppm1m	0.68	0	0.44	0.57	0.63	0	0	0.21	0	0	0.13	0	0	0	0	0.09	0.15
Champ1	0	0	0	0	0.38	0.07	0	0.54	0	0	0	0	0	0	0.09	0	0.83
Adam11	0.36	0.13	0	0.11	0.06	0	0	0.16	0	0	0	0	0	0	0	0	0
Sri	0	0.19	0	0	0	0	0	0	0	0	0	0	0.2	0	0	0	0
Syne2	0.08	0.65	0	0	0	0	0	0	0	0	0.7	0	0	0	0	0.03	0
Pla2g3	0.04	0	0	0	0.01	0.13	0	0.36	0	0	0.27	0	0	0	0.18	0	0
Thap3	0.14	0	0	0	0.07	0	0	0.36	0	0	0	0	0	0	0.17	0	0
St7l	0	0.17	0	0	0	0	0.04	0	0	0	0	0	0.05	0	0	0.13	0
Lhx5	0	0	0	0.87	0.8	0	0	0	0	0	0.45	0.34	0.59	0	0	0	0.64
Slc35f5	0	0.07	0	0	0	0	0.1	0	0.03	0	0	0	0	0	0	0.42	0
5730455P16Rik	0	0	0	0	0	0	0	0.31	0	0	0	0	0	0	0.06	0	0.4
Xylb	0	0.71	0.05	0	0	0	0.38	0	0.12	0.07	0	0	0	0	0	0.67	0
Epb41	0	0	0	0	0	0.05	0	0	0	0.02	0	0.1	0.01	0	0.15	0.06	0
Prkaa1	0	0.32	0	0	0	0	0.11	0	0	0	0	0	0	0	0	0.21	0
Slc4a5	0	0.36	0	0.07	0	0	0.64	0	0.1	0.01	0.13	0	0	0.09	0	0.45	0
Slc38a7	0	0.06	0	0	0	0	0.05	0	0	0	0	0	0	0	0.03	0.07	0
Sec14l5	0.09	0.38	0	0.6	0	0	0.85	0	0.31	0	0	0	0	0.01	0	0.3	0
Pbk	0	0	0	0	0	0.59	0	0.75	0.53	0.77	0	0	0	0	0.3	0	0
Bach2	0.11	0.41	0.1	0.13	0.07	0	0	0	0	0	0.19	0	0	0	0	0.33	0
Fam20c	0	0	0	0	0	0	0	0.71	0	0.27	0	0	0	0	0.5	0	0.43
Trim66	0	0.07	0	0	0	0	0.23	0	0	0	0	0	0	0	0	0.44	0
Synpo	0	0.36	0	0	0	0	0.46	0	0.22	0	0	0	0	0	0	0.09	0
Cyb5r2	0.36	0	0	0	0.94	0.51	0	0.25	0	0.11	0	0	0	0.05	0	0	0
Cc2d1b	0	0.07	0	0.04	0.01	0	0.09	0	0	0	0	0	0	0	0	0.04	0
Steap3	0	0	0	0	0	0.81	0	0.88	0.24	0.46	0.31	0	0	0.84	0	0	0.4
Atp6v1c2	0.17	0.04	0	0	0	0.41	0	0	0.37	0	0	0	0.7	0.7	0	0	0.09
Tada3	0	0	0	0	0	0	0	0.11	0	0	0	0	0	0	0.34	0	0
Tmem220	0	0.75	0.47	0	0	0	0.1	0	0	0	0	0.18	0.04	0	0	0.39	0
Zfp623	0.15	0.56	0.2	0	0	0	0.47	0	0	0	0	0	0	0	0	0.26	0
Crocc	0	0	0	0	0.24	0.04	0	0.32	0.06	0	0	0	0	0	0	0	0
Ppp6r3	0	0.18	0.17	0.03	0	0	0.06	0	0	0	0	0.16	0	0	0	0.05	0
Greb1l	0	0.54	0.57	0	0	0	0	0	0	0	0	0	0	0	0	0	0
Col19a1	0.17	0.05	0	0.37	0.52	0	0.33	0	0	0	0	0	0.31	0	0	0.74	0
Efemp1	0	0	0	0	0.05	0.93	0.48	0	0	0.95	0	0	0	0	0	0.04	0
Kdm4c	0	0.21	0	0	0	0	0.1	0	0.11	0	0	0	0	0	0	0.21	0
Emc4	0	0	0	0	0	0	0	0.34	0	0	0	0	0	0.01	0.02	0	0.21
Fbxo16	0	0.48	0.02	0	0	0	0.49	0	0	0	0	0	0	0	0	0.08	0
St8sia2	0	0	0	0	0.83	0.5	0	0.91	0.88	0.27	0	0	0	0	0	0	0
Zc3h7a	0	0	0	0	0	0.05	0	0.13	0	0.06	0	0	0	0	0.07	0	0
Fam107b	0	0.05	0	0	0	0	0	0	0	0	0.71	0.81	0.18	0	0	0.35	0
Asrgl1	0	0.23	0	0	0	0.41	0	0	0	0	0.02	0	0	0	0	0.08	0
Hspa12a	0	0.71	0	0	0	0	0.48	0	0.08	0	0	0	0	0	0	0.46	0
Zfp644	0	0.38	0	0	0	0	0.2	0	0	0	0	0.07	0	0	0	0.01	0
Kif1a	0.07	0	0	0.1	0.16	0	0	0.2	0	0.09	0	0	0	0.08	0.14	0	0
BC052040	0	0.07	0	0	0	0	0	0	0	0.16	0	0	0	0	0	0.22	0
Baat	0	0.82	0.28	0.05	0	0	0.32	0	0.13	0	0	0.07	0.11	0	0	0.56	0
Rprd1a	0	0.04	0	0	0	0	0	0	0	0	0	0	0	0	0	0.15	0
Gpatch1	0.28	0	0	0	0.1	0	0	0.28	0	0	0	0	0	0	0.13	0	0
Slc35f1	0.41	0.04	0	0.05	0	0.21	0.21	0	0	0	0	0	0.21	0	0.24	0.21	0.2
Duox1	0.3	0.71	0.59	0	0	0	0.44	0	0	0	0.37	0.15	0	0	0	0.08	0
E330009J07Rik	0	0.33	0.07	0	0	0	0	0	0	0	0	0	0	0	0	0.02	0
Thnsl1	0.08	0	0	0.02	0.53	0	0	0.04	0	0	0	0	0	0	0.35	0.15	0.63
Tctex1d1	0	0.47	0.21	0.5	0	0.01	0	0	0	0	0	0	0	0	0	0.02	0
Myo6	0	0.07	0	0	0	0	0.24	0	0.43	0	0	0	0	0	0	0.15	0
Snx29	0	0.34	0.05	0	0	0	0.03	0	0	0	0	0	0	0	0	0.21	0
Map1s	0.02	0	0	0	0.21	0.05	0	0.25	0	0	0	0	0	0	0.02	0	0.02
Zbtb48	0	0.25	0	0	0	0	0.19	0	0	0	0	0	0	0	0	0.19	0
Camk1g	0	0	0	0	0	0	0	0.23	0.65	0.4	0	0	0	0.27	0	0.07	0.01
Abl2	0	0.32	0.09	0.03	0	0	0.15	0	0	0	0	0	0	0	0	0.16	0
Atg5	0	0.16	0	0	0	0	0.01	0	0	0	0	0	0	0	0	0.16	0
Eaf2	0.03	0	0	0	0.76	0	0	0.71	0	0	0	0	0	0	0.35	0	0.03
Riok3	0.07	0	0	0	0	0.03	0	0.2	0	0	0	0	0	0	0.08	0	0.11
Garnl3	0	0	0	0	0.5	0	0	0.51	0	0.06	0.29	0	0	0.23	0.6	0	0.46
Chm	0	0.15	0	0.01	0	0	0.06	0	0	0	0	0	0.02	0	0	0.13	0
Nol4l	0	0	0	0	0	0.32	0.02	0	0.04	0.03	0	0	0	0	0	0	0
Ptprg	0.21	0.23	0.08	0.14	0.22	0.03	0.01	0	0	0.08	0	0	0.63	0.2	0	0.21	0
Armcx3	0	0.22	0.11	0	0	0	0	0	0.21	0	0.08	0	0	0	0	0.07	0
Abhd16a	0	0	0	0	0.17	0	0	0.14	0	0	0	0.01	0	0	0.01	0	0
Grem2	0	0	0	0	0	0	0.25	0	0	0	0	0	0	0.4	0.91	0.42	0.02
Rad51ap2	0.15	0.04	0	0	0.92	0	0	0.12	0	0	0	0	0.35	0	0	0.21	0
Ets1	0.03	0.53	0	0	0.1	0	0.5	0	0.32	0	0	0	0	0.45	0	0.38	0
Pls3	0	0	0	0	0	0	0	0.87	0.4	0.27	0	0	0	0.16	0	0	0
Arhgef7	0	0.2	0	0.01	0	0	0.16	0	0	0	0	0	0	0	0	0.25	0
Tmem132c	0.37	0.2	0.54	0	0	0	0	0	0	0	0.82	0.72	0	0	0	0	0
Npy	0	0	0	0	0	0	0	0.82	0.02	0.38	0.1	0	0	0	0	0	0
Supt20	0	0.07	0	0	0	0	0	0	0	0	0	0	0.07	0	0	0.11	0
Pde3a	0	0	0	0	0	0	0.74	0	0	0	0	0	0.98	0	0	0.79	0
Lrch3	0	0.02	0	0	0	0	0	0	0.02	0	0	0	0.04	0	0	0.08	0
Cbln2	0.16	0.07	0.65	0.14	0.52	0.04	0	0	0	0	0	0	0.12	0.08	0	0.23	0.79
Kazn	0	0.51	0	0.04	0	0	0.76	0	0.05	0	0	0	0	0	0	0.46	0
Ank	0	0.23	0	0	0	0.17	0	0	0.04	0.11	0	0	0	0	0	0	0
Raly	0	0.73	0	0	0	0	0.36	0	0.43	0.07	0	0.15	0	0	0	0.53	0
Mvk	0.15	0.05	0.46	0.02	0	0	0	0	0	0	0.06	0	0	0	0	0.16	0
Atp1b2	0	0	0	0	0	0	0	0.17	0	0	0.36	0	0	0	0.05	0	0.02
Bmi1	0	0.59	0.08	0.09	0	0	0.58	0	0	0	0	0.04	0	0	0	0.43	0
Bag3	0.51	0.43	0.45	0	0	0	0	0	0	0	0	0	0	0.88	0	0.25	0
Nap1l1	0	0.33	0	0	0	0	0	0	0	0	0	0	0.12	0	0	0.11	0
Slc8a1	0	0.18	0	0.03	0	0	0.24	0	0.09	0	0.07	0.18	0.21	0	0	0.23	0
Eps8	0	0	0	0.22	0	0.19	0	0.56	0.41	0.23	0	0	0	0	0	0	0
Krt10	0	0	0	0	0	0.17	0	0.59	0	0.03	0	0	0	0	0.82	0	0.22
Adcy8	0	0	0	0.94	0.83	0	0.21	0	0	0	0.41	0	0	0	0.45	0.64	0
Scpep1	0	0.08	0	0	0	0	0.13	0	0	0	0	0	0	0	0	0.13	0
Trdmt1	0	0.08	0	0	0	0	0.27	0	0.06	0	0	0	0	0.27	0	0.5	0
Psmf1	0	0.27	0	0.16	0	0	0.1	0	0	0	0	0	0	0	0	0.03	0
Vav2	0.59	0.96	0.08	0.15	0	0	0.22	0	0	0	0	0	0	0	0	0.25	0
Senp5	0	0.06	0	0	0	0	0	0.07	0	0	0	0	0	0	0	0.09	0
Tube1	0.02	0.63	0	0	0	0	0.3	0	0.03	0	0	0.07	0	0	0	0.45	0
Slx4ip	0	0	0	0	0	0.01	0	0.13	0	0	0	0	0	0	0	0.06	0
Mtfr1	0	0.13	0	0	0	0	0.07	0	0.41	0	0	0	0.07	0	0	0.13	0
Gstm5	0	0	0	0	0.04	0	0	0.36	0	0	0.18	0	0	0	0.49	0	0.55
Brwd1	0.03	0.13	0	0.06	0	0.01	0.13	0	0	0	0	0	0	0	0	0.01	0
Fastkd2	0	0.42	0.13	0.06	0	0	0.18	0	0	0.02	0	0	0	0	0	0.35	0
Uba6	0	0.13	0	0	0	0	0	0	0	0	0	0.22	0.06	0	0	0.11	0
Aifm3	0.03	0.06	0	0	0	0.14	0	0	0	0.08	0	0	0	0	0.31	0.06	0.24
Uba3	0	0.25	0	0	0	0	0.02	0	0	0	0	0	0	0	0	0.06	0.06
Pdzd7	0.2	0.83	0.22	0.15	0	0	0.8	0	0	0	0	0	0	0	0	0.24	0
Zfp804a	0	0.59	0.61	0.78	0.17	0	0.8	0	0	0	0	0	0	0	0	0.27	0
Bnc2	0	0.37	0.19	0	0	0.31	0.34	0	0	0.26	0	0	0	0	0	0.79	0
Arpc5l	0	0	0	0	0	0.03	0	0.07	0	0	0	0	0	0	0.03	0	0.67
Hmgcl	0	0	0	0	0.48	0.11	0	0.78	0	0	0	0	0	0	0.55	0	0
Hlcs	0	0.42	0.11	0.12	0	0	0.17	0	0	0	0	0	0	0	0	0.18	0
Lpar3	0	0.02	0.54	0.32	0	0	0	0	0	0	0	0	0	1	0	0	0
Dna2	0	0.85	0.12	0.04	0	0	0.5	0	0	0	0	0.05	0	0	0	0.54	0
Ogfod1	0	0	0	0	0	0	0	0.46	0	0	0	0	0	0	0.26	0	0
Ldoc1	0	0.32	0.11	0.03	0	0	0.34	0	0	0	0.07	0.02	0.07	0	0	0.37	0
Creg2	0	0.31	0	0	0	0	0.52	0	0.23	0	0	0	0	0	0	0.37	0
Syt14	0	0.39	0.2	0	0	0	0.15	0	0.08	0	0	0	0	0	0	0.2	0
Sigmar1	0	0	0	0	0.03	0	0	0.21	0	0.09	0	0	0	0	0.63	0	0
Jhy	0	0.25	0.4	0.81	0	0	0.24	0	0.3	0.12	0	0	0.22	0	0	0.37	0
BC017158	0	0.66	0.37	0.06	0	0	0.34	0	0	0	0	0.03	0	0	0	0.37	0
Gsk3b	0	0.17	0.04	0.14	0	0	0.1	0	0.05	0	0	0.13	0.1	0	0	0.13	0
Hcls1	0	0.73	0.45	0	0	0	0.57	0	0	0	0.12	0	0.08	0	0	0	0
Kcnip1	0	0	0	0	0.03	0.14	0	0	0.48	0.35	0.2	0	0.4	0.38	0.26	0.03	0.21
Usp42	0	0.37	0	0.04	0	0	0.01	0	0	0	0	0	0	0	0	0.18	0
Insr	0	0	0	0	0	0	0	0	0	0	0.04	0.23	0	0	0	0.17	0
Sncb	0	0	0	0	0	0	0	0.09	0	0.17	0.06	0	0	0	0.15	0	0.07
Nox4	0.27	0	0	0.07	0	0.73	0.37	0.21	0	0	0	0	0.95	0	0.33	0	0
Scg2	0.17	0	0	0	0.31	0	0	0.31	0	0	0.2	0.14	0	0	0.22	0	0.34
Nfya	0.16	0.36	0.26	0.15	0	0	0	0	0	0	0	0	0.01	0	0	0.32	0
Araf	0.13	0	0	0.12	0.52	0	0	0.55	0	0	0	0	0	0	0.47	0	0.15
Ldah	0	0.28	0	0	0	0	0.12	0	0	0	0	0	0.03	0	0	0.07	0
Paip2	0	0	0	0.07	0.17	0.01	0	0.21	0	0	0	0	0.15	0.07	0.1	0	0
Mrps5	0	0.35	0.19	0.01	0	0	0	0	0	0	0	0	0	0	0	0.01	0
Slc6a17	0	0	0	0	0	0	0	0.57	0	0	0	0	0	0	0.22	0	0
Bscl2	0	0.1	0	0	0	0	0	0	0	0	0	0	0	0	0	0.06	0
Fnbp1	0.02	0.16	0.17	0.17	0	0	0.17	0	0	0	0	0	0.01	0	0	0.1	0
Rxra	0.22	0.56	0.45	0	0	0	0	0	0	0	0	0	0	0	0	0	0
B3galt6	0	0	0	0	0.05	0	0	0.64	0	0.13	0.32	0	0	0	0.36	0	0.36
Mns1	0.03	0	0	0	0	0	0	0.39	0	0	0	0	0	0	0	0	0.65
Rrm1	0	0.63	0.09	0.06	0	0	0.34	0	0	0	0.1	0.17	0	0	0	0.31	0
Snap23	0	0.22	0.03	0	0	0	0	0	0	0	0	0	0	0	0	0.06	0
Lnx1	0	0	0	0	0	0	0.27	0	0.26	0.21	0.17	0	0	0	0.03	0.18	0
Aqr	0	0.3	0	0	0	0	0.19	0	0	0	0	0	0	0	0	0.25	0
Wwp1	0	0	0	0	0	0	0	0.33	0	0.4	0	0	0	0	0.08	0	0
Psmc3	0	0	0	0	0	0	0	0.25	0	0	0	0	0	0	0.46	0	0.4
Scaf8	0	0.15	0	0.08	0	0	0.08	0	0	0	0	0.02	0	0	0	0.17	0
Urgcp	0	0.16	0.13	0.02	0	0	0	0	0	0	0	0	0	0	0	0.02	0
Tmem159	0.57	0	0	0.1	0	0.14	0	0.07	0.45	0.4	0	0	0	0.18	0	0	0
Galnt1	0	0	0	0	0	0	0	0	0.05	0	0	0	0.31	0.03	0	0.07	0
Btrc	0	0.12	0	0	0	0	0	0	0	0	0	0.03	0	0	0	0.15	0
Pnpla3	0.22	0.27	0.6	0.47	0	0	0.14	0	0	0	0	0	0	0	0	0	0
Zfp618	0	0	0	0	0	0	0	0	0.1	0.18	0	0.17	0.6	0	0	0.05	0
Ubb	0	0	0	0	0.18	0	0	0.34	0	0.07	0.19	0.12	0.01	0	0.25	0	0.55
Sgcg	0.02	0.9	0.48	0.11	0	0	0.48	0	0.06	0	0	0	0	0	0	0.37	0
Rtf2	0	0.36	0	0	0	0	0.22	0	0	0	0	0	0	0	0	0.09	0
Moxd1	0	0.5	0.88	0	0	0	0	0	0.82	0.09	0	0	0	0	0	0.42	0
Dnmbp	0	0.08	0	0	0	0	0	0	0	0	0	0.14	0	0	0.09	0.07	0
Prr14l	0	0.06	0.09	0	0	0	0	0	0.02	0	0	0	0	0	0	0.02	0
Irf5	0.17	0.33	0.04	0.59	0	0	0.3	0	0	0	0	0	0	0.13	0	0.39	0
Mapkap1	0	0.19	0.17	0	0	0	0	0	0	0	0	0	0	0	0	0.01	0
Tssc4	0.04	0	0	0	0.09	0	0	0.22	0	0	0	0	0	0	0.03	0	0.12
Olfr323	0.15	0	0	0	0.42	0	0	0.74	0.09	0.15	0	0	0	0	0.05	0	0.88
Slc12a9	0	0	0	0	0	0.35	0	0.62	0.09	0.17	0	0	0	0	0	0	0
Neurl1b	0	0.48	0	0	0	0	0.35	0	0.43	0.6	0	0	0.15	0	0	0.02	0
Wipf3	0	0	0	0	0	0.41	0	0	0	0.13	0	0	0	0.77	0	0.1	0
Mbtd1	0.11	0	0.14	0	0	0	0	0.03	0	0	0	0	0	0	0	0.03	0
Agpat4	0	0.03	0	0	0	0	0.08	0	0	0	0	0	0.15	0	0	0.17	0
Tmem67	0	0.4	0	0	0	0	0	0	0	0	0	0	0	0	0	0.22	0
Csnk1g3	0	0.07	0	0	0	0	0	0	0	0	0	0	0	0.02	0	0.05	0
D5Ertd579e	0	0.19	0	0	0	0	0.12	0	0	0	0	0	0.05	0	0	0.18	0
Gclc	0	0	0	0	0	0.18	0	0.47	0.05	0	0	0	0.07	0.03	0	0	0.16
Nuak1	0.04	0.2	0.15	0	0	0	0.27	0	0	0	0	0	0	0	0	0.25	0
Timp3	0	0.31	0	0	0	0.19	0.45	0	0	0	0.04	0	0	0	0	0.66	0
Zcchc2	0	0.47	0	0.21	0	0	0.17	0	0	0	0	0	0	0	0	0.31	0
Rbpj	0	0.47	0	0.03	0	0	0.44	0	0.02	0	0	0.05	0	0	0	0.46	0
Nat9	0	0.17	0	0	0	0	0.2	0	0	0	0	0	0	0	0	0.36	0
Ube2d1	0	0.28	0.17	0	0	0	0.01	0	0	0	0	0	0	0	0	0.28	0
Fmnl2	0	0.22	0.17	0	0	0	0.21	0	0	0	0.21	0.13	0	0	0	0.23	0
Camkk2	0	0	0	0	0	0.54	0	0.49	0	0.34	0.15	0	0	0	0.45	0	0.5
Gpr88	0	0	0.35	0.87	0.22	0.6	0.21	0.04	0	0.14	0	0	0	0	0	0	0.4
Fam107a	0	0.38	0.16	0.21	0	0	0.62	0	0.18	0	0	0	0	0	0	0.22	0
Plscr4	0	0.77	0	0	0	0.36	0	0	0.11	0	0.21	0	0.04	0	0	0.49	0
Syt6	0	0.43	0.58	0	0	0.98	0	0	0.16	0.35	0	0	0	0	0	0	0
Sh3bp5	0	0	0	0	0.17	0	0	0	0	0	0.27	0.11	0	0	0.16	0.09	0
Nuggc	0.12	0.57	0.46	0	0	0	0.05	0	0.43	0	0	0.11	0	0	0	0.37	0
Rbm19	0	0.21	0	0	0	0	0	0	0	0	0	0	0	0.11	0	0.13	0
Zfp605	0	0.35	0	0	0	0	0.07	0	0	0	0	0	0	0	0	0.27	0
Snx25	0	0.56	0.09	0	0	0.08	0	0	0	0	0	0	0	0	0	0.24	0
Rgs6	0	0	0	0	0	0	0	0	0.27	0	0	0.83	0.71	0	0	0.69	0
Nr1h4	0	0	0	0	0	0	0	0	0	0	0.96	0.91	0	0	0	0	0
Ino80	0	0	0	0	0.02	0	0	0.16	0	0	0	0	0	0.03	0	0	0
Itga7	0.86	0.43	0	0	0	0	0	0	0	0	0.67	0	0	0	0	0.39	0
Gpr162	0	0	0	0	0.48	0.06	0	0.75	0	0	0	0	0	0	0.44	0	0.56
Smyd2	0	0	0	0	0	0.08	0	0.07	0	0	0	0	0	0	0.27	0.1	0
Slain2	0	0.03	0	0	0	0	0	0	0	0	0	0	0	0	0	0.05	0
Scaf11	0	0	0	0	0	0	0	0	0	0	0	0.11	0.19	0	0	0.16	0
Arpp21	0.2	0	0	0.22	0.2	0.13	0.43	0.21	0	0.04	0	0	0.21	0	0	0	0.32
Peli2	0	0.35	0.62	0.37	0	0	0	0	0	0	0	0	0	0	0	0	0
Ercc6	0	0.29	0	0	0	0	0.21	0	0	0	0	0	0	0	0	0.09	0
Cdan1	0	0.08	0	0.24	0	0	0	0	0	0	0	0	0	0	0	0.06	0
Fbxl14	0	0.19	0	0.12	0	0	0	0	0.2	0.07	0	0.08	0	0	0	0.49	0
Igsf3	0.36	0.15	0.41	0.55	0	0.14	0	0	0	0	0	0	0	0.46	0.17	0.17	0
Htr2a	0.33	0	0	0.22	0	0.05	0.1	0	0	0	0	0.26	0.15	0.45	0	0.15	0
Sbf2	0	0.22	0.15	0.09	0	0	0.1	0	0.02	0	0.06	0	0.06	0	0	0.17	0
Esyt3	0	0	0	0	0	0.43	0	0.77	0.74	0.41	0	0	0	0	0	0	0
Ncoa5	0	0	0	0	0	0.05	0	0.13	0	0	0	0	0	0	0.14	0	0
Dlgap4	0	0.24	0	0	0	0	0.06	0	0	0	0	0	0	0	0	0.12	0
Tax1bp1	0.04	0	0	0	0	0	0	0	0	0	0	0	0	0	0	0.12	0
Dcbld2	0	0	0	0	0	0	0	0	0	0	0	0	0	0	0	0.13	0.02
B230219D22Rik	0	0	0	0.02	0.33	0	0	0.05	0	0	0	0	0	0	0	0	0
Nipal2	0	0.07	0	0	0	0.11	0	0.06	0	0	0	0	0	0	0	0	0.01
Egln3	0	0.72	0.32	0.13	0	0.39	0.15	0	0	0	0.14	0	0	0	0	0.46	0
Cyp19a1	0.6	0.18	0.9	0	0.95	0	0	0	0.1	0.17	0	0	0	0	0	0	0
Tcta	0.13	0	0	0	0	0	0	0.3	0	0	0	0	0	0	0	0	0.15
Phldb1	0	0.53	0.01	0	0	0	0.25	0	0.16	0	0	0	0	0	0	0.32	0
Cidea	0	0	0	0.24	0.38	0	0	0.14	0	0	0.18	0.66	0.34	0.37	0	0	0
Brk1	0	0	0	0	0	0	0	0.09	0	0	0	0	0	0	0	0	0.33
Whamm	0	0	0	0.26	0.31	0	0	0.01	0	0	0	0	0	0	0.57	0	0.09
Usp28	0	0.1	0	0	0	0	0.01	0	0	0	0	0	0	0	0	0.16	0
Arl3	0	0	0	0.18	0	0	0	0.23	0	0	0	0	0	0	0	0	0
Dsel	0	0	0	0	0.33	0.12	0.09	0	0	0	0	0	0.66	0.42	0	0.27	0
Arhgef2	0	0.38	0	0	0	0	0.04	0	0	0.19	0	0	0	0	0	0.3	0
Plbd1	0	0.65	0.36	0.31	0	0	0.04	0	0.1	0	0	0	0	0	0	0	0
Cdk2ap2	0.1	0	0.11	0	0	0	0	0	0	0	0	0	0.01	0	0.33	0.02	0.81
Mtif2	0	0	0	0	0.16	0	0	0.58	0	0	0	0	0	0	0.11	0	0.27
Rtca	0	0	0	0	0	0.22	0	0	0	0	0	0	0	0	0.05	0.05	0.17
Stard5	0.04	0	0	0	0.33	0	0	0	0	0	0.73	0	0.21	0.81	0.15	0	0
Tmem243	0.07	0	0	0	0.29	0	0	0.48	0	0	0	0	0	0	0.09	0	0.5
Myo1e	0	0.6	0.99	0	0	0	0.23	0	0	0	0	0	0	0	0	0.69	0
Zeb2	0	0	0	0	0	0	0	0	0	0	0	0	0.23	0	0	0.95	0.03
Arhgef3	0	0	0	0	0	0	0	0.03	0	0	0.65	0	0.07	0.21	0	0.05	0
Carf	0	0	0	0	0.21	0	0	0.15	0	0	0	0	0	0	0	0	0
Robo2	0	0.19	0	0.28	0	0	0.41	0	0	0	0	0	0.47	0.17	0	0.23	0
Ergic1	0	0.04	0	0	0	0	0.08	0	0	0	0	0	0	0	0	0	0
Cep350	0	0.13	0	0	0	0	0.08	0	0	0	0	0	0	0	0	0.06	0
Dnase1	0	0.7	0.12	0.08	0	0	0.75	0	0.12	0	0	0.17	0	0	0	0.45	0
Tbl1xr1	0	0.39	0	0	0	0	0.07	0	0	0	0	0.2	0.69	0	0	0.34	0
Cpped1	0	0	0	0	0	0.02	0	0	0.04	0.24	0	0	0.34	0	0	0.09	0
Hsd17b7	0	0.2	0.16	0.09	0	0	0.33	0	0	0	0	0	0	0	0	0.29	0
Nadk	0	0	0	0	0	0	0	0	0.05	0	0	0	0	0	0.13	0.02	0
Top1	0.02	0	0	0	0.15	0.16	0	0.15	0	0	0	0	0.04	0.16	0.04	0	0.01
Btbd3	0	0	0	0	0	0	0	0	0.42	0	0	0.16	0	0	0	0.12	0
Cyp27a1	0	0.36	0.38	0	0	0	0.63	0	0	0	0.22	0	0	0	0	0.69	0
Tmem164	0	0	0	0.01	0.08	0	0	0	0	0	0.32	0.09	0.25	0.57	0	0	0
Slc8a2	0	0.16	0	0.11	0	0.06	0.13	0	0	0	0	0	0	0	0	0	0
Kcnip3	0	0.19	0	0	0	0	0	0	0	0	0.88	0.83	0.29	0	0	0.01	0.28
Fbxo21	0	0.16	0	0	0	0	0.02	0	0.01	0	0	0	0	0	0	0.05	0
Cdkal1	0	0.05	0	0.07	0	0	0.15	0	0	0	0.02	0.14	0.2	0.07	0	0.19	0
Irs4	0	0.3	0	0	0.17	0.11	0.11	0	0	0	0	0	0	0.02	0	0.36	0
Hspa4	0.1	0	0	0	0	0.06	0	0.2	0	0.01	0	0	0	0	0.1	0	0.06
Copa	0	0.21	0.03	0	0	0	0.08	0	0	0	0	0	0	0	0	0.17	0
Pkp1	0	0	0.14	0.33	0	0	0.7	0	0.73	0.56	0	0	0	0	0	0	0
Mettl15	0	0.45	0.02	0	0	0	0.11	0	0	0	0	0	0	0	0	0.17	0
Esm1	0.55	0	0	0.58	0.97	0.2	0	0.7	0	0	0	0	0	0	0	0.13	0
Wnt9a	0.39	0.95	0.63	0.26	0	0.05	0.48	0	0	0	0	0	0	0	0	0.07	0
Hs3st2	0	0	0.46	0	0	0	0	0.98	0.63	0	0.26	0	0	0	0	0.3	0
Zfp106	0	0	0	0.08	0.03	0	0	0.15	0	0	0	0	0	0.08	0	0	0
2810006K23Rik	0	0.39	0	0	0	0	0.39	0	0	0	0	0.06	0	0	0	0.34	0
B3glct	0	0	0	0	0	0	0	0.31	0.75	0.37	0.46	0	0	0	0	0	0
Armc10	0	0.26	0	0.04	0	0	0.48	0	0.03	0	0	0.08	0	0	0	0.13	0
1110004F10Rik	0	0	0	0	0.03	0	0	0.06	0	0	0	0	0	0.04	0.08	0	0
Zfp354b	0	0.52	0	0	0	0	0.06	0	0	0	0	0.11	0	0	0	0.39	0
Ppfibp1	0	0.02	0.22	0	0	0	0.53	0	0	0	0	0.23	0.37	0	0	0.01	0
Sgsm1	0	0.34	0.19	0.12	0	0	0.09	0	0	0	0	0	0.08	0	0	0.16	0
Phgdh	0	0	0	0	0.54	0.07	0	0.38	0.55	0	0	0	0	0	0	0	0
Rfc1	0	0	0	0	0	0	0.01	0	0	0	0	0	0.46	0	0	0	0
Eif5a	0	0	0	0.06	0.11	0	0	0.36	0	0	0	0	0	0	0.35	0	0
Ids	0	0.29	0	0	0	0	0.46	0	0	0	0	0	0.01	0	0	0.33	0
Selenom	0	0	0	0	0.51	0	0	0.45	0	0	0.04	0	0	0	0.65	0	0.58
Itm2a	0.95	0.23	0	0	0.05	0.21	0	0	0	0	0	0	0	0	0	0.2	0
Ybey	0	0.11	0.18	0	0.04	0	0.44	0	0	0	0	0	0	0	0	0	0
Atg7	0	0.54	0	0	0	0	0.45	0	0	0	0	0	0	0	0	0.52	0
Prpf39	0.01	0	0	0	0.18	0	0	0.14	0	0	0	0	0	0	0.16	0	0.02
Ptpn2	0	0.14	0	0	0	0	0	0	0	0	0	0	0	0	0	0.07	0
Adamts14	0	0	0	0.55	0	0	0	0	0.74	0.6	0.4	0	0.17	0	0	0	0
Ttll12	0.1	0.47	0.63	0	0	0	0.05	0	0	0	0	0	0	0	0	0.12	0
Izumo4	0.14	0	0	0.29	0.8	0	0	0.5	0	0	0	0	0	0	0.31	0	0.14
Polr3a	0	0.24	0	0	0	0	0.01	0	0	0	0	0	0	0	0	0.08	0
Nicn1	0	0	0.05	0	0	0.13	0	0.01	0	0	0	0	0	0.07	0.01	0	0.1
Syt1	0	0.23	0	0.25	0.05	0.23	0.25	0	0.21	0	0.24	0.25	0	0	0	0.23	0.24
Crip2	0	0	0	0	0.06	0	0	0	0.26	0.12	0	0	0	0	0	0	0
Sema5a	0	0.47	0	0	0	0	0	0	0.47	0	0.33	0	0	0	0	0.18	0
Slc4a2	0	0	0	0	0.84	0	0	0.26	0	0	0	0	0	0	0.39	0	0.01
Sec61a1	0	0	0	0	0	0.11	0	0.05	0	0	0	0	0	0	0.76	0	0
Ltbp1	0.27	0.25	0.56	0	0	0	0	0.37	0	0.58	0	0.66	0	0	0	0.05	0
Ppef2	0	0	0	0.38	0	0.26	0	0.76	0	0.1	0	0	0	0.03	0.22	0.05	0
Arhgef25	0.05	0	0.03	0.1	0.52	0	0	0.3	0	0	0	0	0	0	0.22	0	0
Rspo2	0	0	0	0.46	0	0	0	0	0	0.04	0	0	0.87	0.08	0	0.07	0
Rps6ka6	0	0.51	0	0.89	0	0	0.23	0	0	0	0	0	0	0	0	0.55	0
Dhrs3	0	0.84	0	0	0	0.09	0	0	0.59	0.41	0	0	0	0.04	0	0.07	0
Agpat5	0	0	0	0	0	0	0	0	0	0	0.08	0	0	0	0	0.2	0
Adgrb2	0	0	0	0	0	0.36	0	0	0.17	0	0	0	0.15	0	0	0	0.03
Syt13	0	0	0	0	0	0.63	0	0.83	0	0.15	0	0	0	0	0.49	0	0.14
Dact2	0.52	0	0	0	0.29	0	0	0.22	0	0	0	0	0	0.18	0.02	0.02	0
Dysf	0	0.7	0	0.17	0	0	0.88	0	0.43	0.1	0	0	0	0	0	0.6	0
Cops7b	0	0.05	0	0	0	0	0	0	0	0	0	0	0	0	0	0.19	0
Cry1	0	0.07	0	0	0	0	0.28	0	0	0	0.1	0	0.06	0	0	0.66	0
Slc30a7	0	0.45	0	0	0	0	0.22	0	0	0	0	0	0	0	0	0.19	0
Trib2	0.12	0	0.72	0.59	0	0	0.31	0	0	0	0.25	0	0.34	0	0	0.21	0
Hsbp1l1	0	0.32	0	0	0	0	0.47	0	0.19	0	0	0	0	0	0	0.58	0
Vgll2	0	0	0	0.28	0	0	0	0	0.81	0.42	0.61	0	0	0	0.87	0	0.95
Hcfc2	0	0.08	0	0	0	0	0.09	0	0	0	0	0	0	0	0	0.19	0
Fosl2	0	0.79	0	0	0	0	0	0	0	0	0.38	0	0.13	0	0	0.96	0
Natd1	0	0	0	0	0.34	0	0	0.57	0.03	0	0	0	0	0	0.4	0.12	0
Prim2	0	0.5	0	0	0	0.47	0.18	0	0	0	0	0	0	0	0	0	0
Nr2f1	0.57	0.69	0.02	0	0	0.62	0	0.64	0.49	0	0	0	0	0	0	0	0.08
Cdon	0	0.55	0	0	0	0	0.04	0	0.11	0	0	0	0	0	0	0.16	0
Cxxc5	0	0	0	0	0	0	0.27	0	0.53	0	0	0	0	0	0	0.23	0
Prr16	0	0	0	0	0	0.24	0.19	0.83	0.87	0.07	0.15	0	0.16	0	0	0.39	0
Fkbp1a	0	0	0	0	0	0.24	0	0.07	0	0	0	0	0	0.13	0	0	0.18
Mad1l1	0.07	0	0	0	0	0.25	0	0.17	0	0.08	0	0	0	0.12	0.03	0	0.22
Itpr2	0	0	0.18	0	0	0	0	0.52	0	0	0	0	0	0.22	0	0.11	0
Gkap1	0	0	0	0	0.06	0.17	0	0.26	0.19	0.12	0	0	0	0.06	0.04	0	0
Srr	0.07	0	0	0	0.14	0	0	0.69	0	0	0	0	0	0	0.28	0	0
Il1rl2	0	0.41	0	0	0	0.15	0	0	0.62	0.86	0	0.17	0	0	0	0.39	0
Cdk17	0.19	0.18	0	0	0	0.02	0	0	0.03	0	0	0	0.16	0.31	0	0	0
Snx32	0	0.16	0.12	0.14	0	0	0	0.09	0	0	0	0	0	0	0	0.05	0
Parvb	0	0.69	0	0.36	0	0	0.24	0	0	0	0	0	0.02	0	0	0.52	0
Dhx32	0	0	0	0	0	0	0	0.2	0	0	0	0	0	0.02	0.05	0	0
Slc17a5	0	0	0	0	0	0	0	0	0	0	0	0	0	0.01	0	0	0
Dnal1	0.1	0	0	0	0	0	0	0.2	0	0	0	0	0	0	0.01	0	0
Lsg1	0	0	0	0	0.46	0	0	0.02	0	0	0	0	0.09	0	0	0.01	0.13
Alpk3	0	0.84	0.06	0.06	0	0	0.7	0	0.09	0	0	0	0	0	0	0.64	0
Sltm	0.16	0	0.04	0	0.22	0.14	0	0.24	0	0	0.01	0	0.06	0.03	0.11	0	0.13
Hmcn1	0.34	0	0	0	0	0.21	0	0	0	0	0	0	0	0	0.83	0.52	0.68
Tep1	0	0.7	0.08	0	0	0	0.11	0	0	0	0	0.12	0.01	0	0	0.33	0
Lrp4	0.36	0	0	0	0	0	0	0	0.71	0.79	0	0	0	0	0.03	0.34	0
Grid2	0	0.22	0	0	0	0.07	0.25	0	0.25	0.24	0.24	0.24	0.23	0.21	0.24	0.25	0
Trim36	0.39	0.89	0.89	0.05	0	0.12	0	0	0.12	0	0	0	0	0	0	0.16	0
Hexa	0	0.18	0.02	0	0	0	0.13	0	0	0	0	0	0	0	0	0.02	0
Elavl2	0.26	0	0.3	0.74	0	0	0.01	0	0	0	0	0.17	0.11	0	0.59	0.38	0
Skap2	0	0.62	0	0	0	0	0	0	0	0.71	0	0	0	0	0	0.38	0
Mga	0	0.09	0	0.05	0	0	0.03	0	0	0	0	0.05	0	0	0	0.08	0
Micu1	0.06	0.49	0.29	0	0	0	0.04	0	0.01	0	0	0	0	0	0	0.25	0
Aspa	0.06	0	0	0	0	0	0	0	0.36	0.55	0.38	0	0	0	0	0.56	0
Slc38a1	0	0	0	0	0	0	0	0.02	0	0	0	0.11	0	0	0	0.31	0
2300009A05Rik	0	0	0	0	0.39	0	0	0.24	0	0.03	0	0	0.04	0	0.32	0	0.8
Ifi35	0.88	0	0	0	0	0	0	0	0	0	0	0	0.23	0	0	0.64	0
Dus3l	0	0	0	0	0.16	0	0	0.21	0	0	0	0	0	0	0.08	0	0
Rrn3	0	0	0	0	0	0	0	0.14	0	0	0	0	0	0.11	0.04	0	0
Rapgef2	0.02	0	0	0	0	0.03	0.14	0	0.09	0	0	0	0	0	0	0.08	0
Limk1	0	0.25	0.23	0.22	0	0	0	0	0	0	0	0	0	0	0.08	0.05	0
Tspan8	0	0.63	0	0.3	0	0	0.35	0	0.08	0.12	0	0.17	0.15	0.02	0	0.72	0
Nup107	0	0.34	0	0	0	0	0.08	0	0	0	0	0	0	0	0	0.09	0
Cdk12	0.13	0	0	0.15	0.17	0.08	0	0.16	0	0	0	0	0	0	0.14	0	0
Car3	0.18	0.99	0.83	0.41	0	0	0	0	0	0	0	0	0	0	0	0	0
Anapc10	0	0.33	0	0	0	0	0.29	0	0	0	0	0	0	0	0	0.41	0
BC049352	0	0	0.83	0	0.18	0.43	0	0	0	0	0	0	0	0	0.51	0.18	0
Zscan22	0	0	0	0	0.31	0	0	0.53	0	0	0	0	0	0	0	0	0.54
Ndufs4	0	0	0	0	0	0	0	0.16	0	0	0.03	0.14	0	0	0	0	0.04
Poln	0	0.69	0.34	0	0	0	0.01	0	0	0	0	0	0	0	0	0.13	0
Sntb1	0	0	0	0	0.02	0.58	0.09	0	0.02	0	0	0.32	0	0	0	0	0.87
Ptpn13	0.91	0	0.55	0.7	0	0	0.4	0	0.03	0	0	0	0.05	0	0	0.09	0
P2rx6	0	0	0	0	0	0.16	0	0	0.67	0.29	0.41	0.6	0	0	0	0.42	0
Vps52	0	0.37	0	0	0	0	0.28	0	0.04	0	0	0	0	0	0	0.04	0
Rnf130	0	0.3	0.13	0	0	0	0.16	0	0	0	0	0	0	0	0	0.19	0
Knop1	0	0	0	0	0.34	0	0	0.62	0	0	0	0	0	0	0.15	0	0
Dusp4	0	0	0	0.37	0.39	0	0.19	0	0	0	0.57	0.42	0	0	0	0.78	0
Lamp2	0	0	0	0	0	0.28	0	0	0	0	0	0	0	0	0	0.05	0
Cic	0	0	0	0	0.26	0.03	0	0.6	0	0	0	0.11	0	0	0.16	0	0.48
Vamp1	0.11	0	0	0	0.02	0.49	0	0.12	0	0.01	0	0	0	0	0.53	0	0
Isl1	0	0.34	0.92	0	0	0	0	0	0	0	0	0	0	0.79	0.57	0.12	0.63
Grik2	0.24	0.23	0	0.29	0.19	0.17	0.25	0	0.1	0	0.19	0.17	0	0	0	0.2	0.17
Ubash3b	0	0.15	0	0	0	0.31	0	0	0	0	0.43	0.2	0	0	0	0.65	0
Maf	0	0	0	0	0	0.95	0.9	0	0	0.79	0	0	0	0	0	0	0.26
Ptk2b	0	0.74	0	0	0	0.85	0.37	0	0.68	0	0	0	0	0.09	0	0.35	0
Kcnj2	0.18	0	0	0.48	0	0	0.33	0	0	0	0	0.1	0.81	0.35	0	0.28	0
Smc1b	0	0.36	0.04	0	0	0	0	0	0.32	0	0.02	0.05	0	0	0	0	0
Ing4	0	0.33	0	0	0	0	0.06	0	0	0	0	0	0	0	0	0.02	0
Armc2	0	0.47	0	0	0	0	0.18	0	0.05	0	0	0	0	0	0	0.17	0
Adssl1	0.04	0.02	0	0.71	0.1	0	0	0	0	0	0.11	0.14	0	0	0	0.13	0
Mcf2l	0	0.11	0	0.17	0	0.16	0.16	0	0	0	0	0	0	0	0	0	0
Ablim3	0	0.18	0.19	0	0	0	0	0	0	0	0	0	0	0	0	0.03	0
Nr1d2	0	0.09	0	0	0	0	0.01	0	0	0	0	0	0	0	0	0.02	0
Fam229b	0	0	0	0	0.46	0	0	0.64	0	0.22	0	0	0	0	0.05	0	0
Slc39a8	0	0	0	0.33	0	0	0.5	0	0	0	0	0.53	0.83	0	0	0.34	0
Arid4b	0	0.18	0.06	0.19	0	0	0.17	0	0	0	0	0.01	0.12	0	0	0.19	0
Usp34	0	0.14	0	0.2	0	0.1	0.23	0	0.15	0.03	0	0.15	0.05	0	0	0.11	0
Trmt2b	0	0	0.01	0	0	0.13	0	0.2	0	0	0	0	0	0	0	0	0.71
Evi5	0	0.28	0	0	0	0	0.04	0	0	0	0.01	0.08	0	0	0	0.24	0
Gdpd5	0	0	0	0	0.04	0	0	0.02	0.59	0	0.06	0	0	0	0.61	0	0.11
Cradd	0	0.19	0	0	0	0	0	0	0	0	0	0.45	0.05	0	0	0.29	0
Abca7	0.43	0.19	0.34	0.11	0	0.32	0	0	0	0	0	0	0	0	0.36	0	0
Fam160b1	0	0.2	0	0	0	0	0.31	0	0	0	0	0	0	0	0	0.17	0
Ripk1	0	0.25	0.03	0	0	0	0	0	0.22	0	0	0	0	0.03	0	0.17	0
Chaf1b	0.05	0.73	0	0.16	0	0	0.7	0	0.01	0	0	0	0.18	0.14	0	0.38	0
Derl3	0	0.45	0.78	0.13	0	0.33	0	0	0	0	0	0.2	0	0	0	0.22	0
Trim63	0	0.95	0.66	0.11	0	0	0.65	0	0	0	0	0	0	0	0	0.32	0
Ttc7b	0	0.2	0.06	0	0	0	0	0	0	0	0	0.09	0	0	0	0	0
Dnttip1	0.1	0	0	0.06	0.44	0	0	0.28	0	0	0	0	0	0	0.51	0	0.14
Cxxc1	0	0	0	0	0.21	0.26	0	0.06	0.12	0.36	0	0	0	0	0	0	0
Myo3a	0	0	0	0	0	0	0	0	0	0	0	0	0.68	0.39	0.09	0.54	0
Rgs8	0.6	0	0	0	0.4	0	0	0.42	0	0	0.52	0	0	0	0	0	0
Eipr1	0	0.23	0.04	0	0	0	0.07	0	0	0	0	0	0	0	0	0	0
Gpr176	0	0.04	0	0	0	0	0	0	0	0	0	0.23	0	0	0	0.18	0
Pde4d	0	0.11	0	0.16	0.11	0	0.24	0	0.12	0	0.34	0.1	0.3	0	0.16	0.25	0
Rec8	0.62	0	0	0	0.32	0	0	0.23	0.26	0	0	0	0	0	0.43	0	0
Sars	0	0	0	0.13	0.13	0	0	0.14	0	0	0	0	0	0	0	0	0.1
Ism1	0	0.7	0.17	0	0	0	0.01	0	0	0	0	0	0	0	0	0.42	0
Efnb2	0.43	0.58	0.6	0	0	0	0.02	0	0	0	0	0	0.46	0	0	0.09	0
Btbd9	0	0.23	0.05	0	0	0	0.07	0	0.12	0	0	0	0	0	0	0.24	0
Cpne6	0.43	0	0	0	0.58	0.11	0	0.84	0	0	0	0	0	0	0.16	0	0.55
Amz1	0.51	0.04	0	0	0	0.33	0	0.26	0.19	0	0	0	0	0	0	0.02	0
Glod4	0	0	0	0	0.13	0	0	0.34	0	0	0	0	0	0.18	0.06	0	0.15
Sel1l	0.08	0	0	0.07	0.03	0	0	0.05	0	0	0	0	0	0.04	0.13	0	0
As3mt	0	0.38	0	0.73	0	0	0.02	0	0	0	0	0	0.06	0.02	0	0.22	0
Rhpn1	0	0.79	0	0	0	0	0	0	0.06	0	0	0	0.79	0	0	0.15	0
Nrep	0.08	0	0	0	0.44	0	0	0.23	0	0.02	0	0	0.49	0	0.78	0	0.34
Ampd3	0.04	0	0	0.15	0	0	0	0	0	0	0.12	0.14	0	0	0	0	0
Adgra1	0	0	0	0	0	0.05	0	0.5	0.33	0.06	0	0	0	0.1	0.33	0	0.28
Map3k1	0	0.03	0	0	0	0	0.22	0	0	0.07	0.07	0	0	0	0	0.12	0
Slco2a1	0.43	0.31	0	0	0	0	0	0	0	0	0	0	0	0	0	0	0
Sim1	0	0.87	0.1	0.05	0	0	0.7	0	0.1	0	0	0.09	0	0	0	0.64	0
Foxred2	0.03	0	0	0	0.06	0	0	0.25	0	0.03	0.15	0	0	0	0	0.06	0.62
Drc1	0.17	0.18	0	0	0	0	0	0	0.08	0	0	0	0	0	0	0	0
Plch1	0.62	0.7	0.02	0.08	0	0	0.29	0	0	0	0	0.14	0	0	0	0.54	0
Herc3	0.1	0.12	0	0.2	0	0	0	0	0	0	0	0	0	0	0	0.09	0
Phc2	0.02	0	0	0	0.08	0.2	0	0.19	0	0	0	0	0.02	0.13	0.2	0	0
Mat2a	0.02	0	0	0.09	0.02	0.12	0	0.2	0	0.08	0	0	0	0.14	0.1	0	0
Nkx2-1	0.74	0.19	0.62	0.59	0	0.77	0.19	0	0	0	0	0	0	0	0	0	0.11
Ddx1	0	0	0	0	0	0	0	0.19	0	0	0	0	0	0	0	0	0.07
Fam102b	0	0	0	0.42	0	0	0.29	0	0	0	0.53	0	0.07	0	0	0.32	0
Mink1	0	0.12	0.12	0	0	0.06	0.06	0	0	0	0	0	0	0	0	0.07	0
Nme5	0	0.06	0	0	0	0	0.04	0	0.32	0	0	0	0	0	0	0	0
Aak1	0	0.14	0	0	0	0.1	0.2	0	0	0	0	0	0	0	0	0.16	0
Bbx	0	0.09	0.21	0.58	0	0	0	0	0	0	0	0	0	0	0	0.2	0
Chat	0	0.94	0.71	0	0	0.42	0	0	0	0	0	0	0	0	0.66	0.3	0
Khdrbs3	0	0.04	0.27	0.21	0.42	0.18	0	0	0	0	0	0	0	0.18	0.17	0.18	0
Kcnh3	0.57	0.33	0.16	0	0	0.96	0.08	0	0	0	0	0	0.74	0	0	0.08	0.19
Cdyl	0	0.28	0	0	0	0	0.26	0	0.23	0	0	0	0	0	0	0.5	0
Rere	0	0.08	0	0	0	0.04	0.04	0.18	0.19	0.18	0.2	0.2	0.2	0.18	0.1	0.21	0
Dbf4	0	0.64	0	0	0	0	0.01	0	0.22	0	0	0	0	0	0	0.46	0
Adprh	0	0	0	0	0.04	0	0	0.72	0	0	0.36	0	0	0	0.44	0	0.59
Slc25a23	0.06	0	0	0	0.18	0.27	0	0.63	0	0.09	0	0	0	0.16	0.18	0	0.06
Mtss1	0	0.1	0.19	0.2	0	0	0	0	0	0	0	0	0.26	0	0	0.2	0
Actl6b	0	0.01	0.13	0	0	0	0	0.01	0	0	0	0	0	0	0	0	0
Nectin3	0	0	0	0	0	0.6	0	0.45	0.85	0.69	0	0	0	0	0	0	0
Pxdn	0.29	0.02	0.7	0	0	0	0	0	0	0	0	0	0	0	0	0.09	0
Fastk	0.1	0	0	0.04	0.37	0	0	0.31	0	0	0	0	0	0	0	0	0.27
Angpt1	0	0	0	0.16	0	0	0.99	0	0	0.07	0.14	0	0.06	0	0	0.85	0
Alas1	0	0	0	0	0	0.14	0	0.21	0	0	0	0	0	0	0.12	0	0.04
Smarca5	0	0.03	0	0	0	0	0	0	0	0	0	0	0	0	0	0.04	0
Copg1	0.05	0	0	0	0.16	0	0	0.04	0	0	0	0	0	0	0.07	0	0.04
Smurf1	0.03	0.41	0.21	0	0	0.03	0	0	0	0	0	0	0	0	0	0.28	0
Slmap	0	0.31	0	0	0	0	0.1	0	0	0	0	0	0	0	0	0.2	0
Stxbp2	0	0	0.3	0	0	0.36	0	0.36	0.36	0.38	0	0	0.41	0.8	0	0	0
Tshz3	0	0	0	0	0.07	0	0	0	0	0	0.92	0.52	0	0	0	0.55	0
Slc22a4	0	0	0	0	0	0	0	0.27	0.22	0	0.31	0.02	0	0	0.13	0.03	0
Arid2	0	0.08	0.14	0	0	0	0	0	0	0	0	0	0	0.08	0	0.11	0
Cpa5	0	0.35	0.29	0.16	0	0	0.47	0	0.29	0.45	0	0	0	0	0	0.67	0
Trmo	0	0.08	0.16	0	0	0	0.32	0	0	0	0	0	0	0	0	0.12	0
Grm3	0	0	0	0.39	0.45	0	0	0	0	0	0	0	0.23	0	0	0.36	0
Fat2	0	0.77	0.71	0	0	0	0.6	0	0	0	0	0	0.14	0	0	0.14	0
Wac	0	0.13	0	0	0	0	0	0	0	0	0	0	0	0	0	0.15	0
Haus6	0	0.38	0	0	0	0	0	0	0	0	0	0	0	0	0	0.13	0
Smpd1	0	0	0	0	0	0	0	0	0	0	0.02	0	0	0	0.07	0.04	0.21
Irak3	0	0.49	0	0	0	0	0.21	0	0	0	0.06	0.76	0.62	0	0	0.49	0
Kirrel3	0	0.42	0.35	0.03	0.15	0.6	0.85	0	0	0	0.24	0	0	0	0	0.41	0.54
Bicral	0	0.12	0.1	0.07	0	0	0	0	0	0	0	0	0	0	0	0	0
Abcc5	0.07	0.13	0.12	0	0	0.05	0	0	0.15	0.04	0	0	0	0	0	0	0
Aamdc	0	0	0.56	0	0.01	0	0	0	0	0	0.05	0	0	0	0	0.01	0
Frmd4b	0.53	0.39	0.27	0	0	0	0.34	0	0	0	0	0	0	0	0.51	0	0
Ttn	0.22	0.41	0.64	0	0.44	0.02	0	0	0	0	0	0	0	0	0	0.1	0
Celsr2	0	0	0	0	0.53	0.14	0	0.26	0	0	0	0	0	0	0.53	0	0.45
Tubg1	0	0.75	0.2	0.07	0	0	0.64	0	0	0	0	0	0	0	0	0.46	0
Gprc5c	0.07	0.02	0.97	0	0	0	0	0.56	0	0	0	0	0	0	0	0.11	0
Cbfa2t2	0	0.12	0	0	0	0	0.09	0	0	0	0	0	0.07	0	0	0.13	0
Pitpnm2	0	0	0	0	0	0	0	0	0	0	0	0.13	0.5	0	0	0.21	0
Prkg2	0.74	0	0	0	0.32	0.34	0.29	0	0.52	0.18	0	0	0	0	0	0	0
Zdhhc20	0.02	0	0	0	0.13	0	0	0.06	0.07	0	0	0	0.09	0	0.19	0.01	0
Capn8	0	0.63	0	0	0	0.04	0.58	0	0.04	0	0.49	0.2	0	0	0	0.39	0
Stil	0	0.72	0.42	0	0	0	0	0	0	0	0	0	0	0	0	0.13	0
Nhs	0	0.29	0.4	0	0	0	0	0	0	0.08	0	0	0.14	0.01	0	0.18	0
Bcar3	0	0	0	0	0	0	0	0	0.53	0.66	0	0	0	0	0	0.41	0
Cit	0.12	0.05	0.08	0	0.01	0	0	0	0	0.07	0	0	0.11	0.01	0.18	0	0.09
Deup1	0	0.44	0	0	0	0	0.24	0	0.13	0.31	0	0	0	0	0	0.51	0
Slc35e3	0	0.11	0.05	0	0.29	0	0.17	0	0	0	0	0	0	0	0	0.23	0
Enc1	0	0	0	0	0	0	0	0	0.15	0	0.04	0	0	0.28	0	0	0.19
Sh3bgr	0	0.87	0.09	0	0	0	0.77	0	0.02	0	0	0.07	0	0	0	0.39	0
4933424G06Rik	0.35	0	0	0	0.69	0	0	0.92	0.04	0.14	0	0	0	0	0.03	0	0
Rnasel	0.17	0.05	0.48	0.1	0.77	0	0	0	0	0	0.52	0	0	0	0.17	0.27	0
Slc25a24	0	0.58	0.38	0	0	0	0.57	0	0	0	0	0.1	0.15	0	0	0.33	0
Il1rapl1	0	0	0	0.23	0.24	0.21	0.24	0.25	0.24	0.23	0.21	0	0	0.22	0.24	0.06	0.13
BC025920	0	0.76	0.16	0	0	0	0.33	0	0	0	0.11	0	0	0	0	0.38	0
Bcor	0	0	0	0	0	0	0	0.05	0	0	0	0	0.12	0.11	0.32	0	0.17
Palld	0	0.52	0.07	0.12	0	0	0.33	0	0	0	0.16	0.05	0	0	0	0.4	0
Pde1c	0.94	0.55	0.68	0	0	0.06	0.05	0	0	0	0	0	0	0	0.2	0	0
Scnn1b	0	0.41	0.28	0	0	0	0.52	0	0	0.28	0	0.23	0	0	0	0.5	0
Ddrgk1	0	0	0	0.04	0.48	0	0	0.13	0	0	0	0	0	0	0.01	0	0.08
Aff2	0	0.18	0.48	0	0	0	0.35	0	0.06	0	0.23	0	0	0	0	0.07	0
Cdc42se2	0	0.32	0	0	0	0	0	0	0	0	0	0	0	0	0	0.24	0
Sh3d19	0	0.25	0.16	0	0	0.08	0	0	0	0	0	0	0	0	0	0.11	0
March3	0	0	0	0	0	0	0	0	0	0	0.73	0.35	0	0.53	0	0.02	0
Gpr149	0	0	0	0	0	0.75	0	0.83	0.85	0.55	0	0	0	0	0	0	0
Plekhn1	0.23	0	0	0	0.56	0.3	0	0.5	0	0	0	0	0	0	0.8	0	0
Aftph	0	0	0	0	0	0	0	0.11	0	0	0	0	0	0.16	0	0	0.1
Uba7	0	0.61	0	0	0	0	0.55	0	0.61	0	0	0.03	0	0	0	0.45	0
Eef1b2	0	0	0	0	0	0	0	0.02	0	0	0.02	0	0	0	0	0	0.2
Cog6	0	0.62	0	0	0	0	0.08	0	0	0	0	0	0	0	0	0.3	0
Isca2	0	0	0	0	0.14	0.01	0	0.45	0	0	0	0	0	0	0.39	0	0
Fgd1	0	0.1	0	0	0	0	0.16	0	0	0	0	0	0	0	0	0.04	0
Cfap36	0.05	0	0	0.16	0.12	0	0	0	0	0	0	0	0.06	0	0	0	0.1
Gfra2	0.49	0	0	0	0	0.56	0	0.09	0.88	0.38	0	0	0	0	0	0.05	0
Tlr5	0	0.91	0.68	0	0	0	0.09	0	0	0	0	0	0	0	0	0.05	0
Gpc5	0.02	0.43	0.56	0.32	0	0.08	0.73	0	0	0	0	0	0	0.09	0	0.5	0
Gpr39	0	0	0	0	0.92	0	0	0.51	0.63	0	0	0	0	0	0	0	0
Cdk13	0	0.23	0.02	0	0	0	0.18	0	0	0	0	0	0	0	0	0.21	0
5730409E04Rik	0	0.08	0	0	0	0	0.3	0	0.09	0.12	0	0	0	0.05	0	0.15	0
Apba3	0	0	0	0	0.02	0.02	0	0.73	0	0	0	0	0	0	0.56	0.07	0
Sfi1	0	0	0	0	0.13	0	0	0.3	0	0	0	0	0	0	0	0	0.04
Pla2g7	0.39	0	0.56	0.03	0.25	0	0	0	0	0	0	0	0	0	0.15	0	0.32
Cacnb4	0	0.1	0	0	0	0.07	0	0	0	0.21	0	0	0.07	0.07	0.07	0	0
Sgpp2	0	0.02	0	0	0	0	0.37	0	0	0	0	0	0	0	0	0.03	0
Commd7	0	0.23	0	0	0	0	0	0	0.02	0	0.02	0	0	0	0	0.36	0
Rwdd3	0	0.44	0	0.09	0	0	0.41	0	0.08	0	0	0	0	0	0	0.42	0
Clcc1	0.1	0	0	0	0.06	0	0	0.27	0	0	0.07	0	0	0	0.62	0	0.06
Gdf6	0.98	0.26	0	0	0	0	0.72	0	0	0	0	0	0	0	0	0.14	0
Tusc3	0	0	0	0.19	0.18	0	0.12	0.1	0	0	0.04	0.05	0.09	0	0	0	0
Opcml	0	0	0	0	0	0.26	0	0.53	0.61	0.52	0.21	0.21	0.22	0.3	0.42	0	0
Tnnc2	0	0.63	0	0.13	0	0	0.58	0	0.05	0	0	0	0.06	0	0	0.86	0
Tet3	0	0.18	0	0.14	0	0	0	0	0	0	0	0	0	0	0	0.17	0
Wif1	0	0.12	0.89	0	0	0.4	0	0	0	0.08	0	0	0	0.13	0	0.46	0
Rbfa	0	0.23	0.22	0	0	0	0	0	0	0	0	0	0	0	0	0.4	0
Cyp21a1	0	0.84	0	0.17	0	0	0.62	0	0.15	0	0	0	0	0	0	0.38	0
Fcho2	0.05	0	0.04	0	0	0.43	0	0.02	0	0	0	0	0	0	0.05	0	0
Donson	0	0.72	0.07	0.03	0	0	0.5	0	0	0	0	0.05	0	0	0	0.55	0
Nbn	0	0.13	0	0	0	0	0.16	0	0.05	0.04	0	0	0	0	0	0.28	0
Zfyve19	0	0	0	0	0	0	0	0.67	0	0	0	0	0	0	0.77	0	0
Adck5	0	0	0.08	0	0	0	0	0.2	0.04	0	0	0	0	0	0.04	0.03	0
Rgl3	0	0.61	0	0	0.16	0	0.43	0	0.22	0.06	0	0	0	0	0	0.58	0
Cnnm2	0	0.26	0	0	0	0	0.18	0	0	0	0	0	0	0	0	0.22	0
Nsun7	0	0	0	0	0.14	0.09	0	0.35	0	0	0	0	0	0	0	0	0
Pex3	0	0.09	0	0	0	0	0	0	0	0	0	0	0	0	0	0.03	0
Pbxip1	0	0	0	0	0.1	0	0	0.36	0.43	0	0.12	0	0	0	0	0.18	0
Stx18	0	0.12	0	0	0	0	0	0	0	0	0	0	0	0	0	0.03	0
Ifnar1	0	0.39	0	0	0	0	0.4	0	0	0	0	0	0	0	0	0.33	0
Cfap44	0	0	0	0	0.13	0.11	0	0.86	0.48	0.36	0	0	0.01	0	0	0	0
Pth2r	0.62	0.44	0	0.69	0	0	1	0	0	0	0	0	0	0	0	0.65	0
Syt5	0	0.16	0	0	0	0	0.1	0	0	0	0	0	0	0	0	0	0
Endou	0.27	0.86	0.1	0	0	0	0.32	0	0.44	0	0	0.17	0	0	0	0.21	0
Npy2r	0.98	0.02	0	0	0	0	0	0	0	0	0	0	0.73	0	0	0.03	0
Sgcd	0	0	0.19	0	0.24	0	0	0	0	0	0.66	0.41	0	0.22	0.19	0	0.28
Ube2f	0	0.26	0	0	0	0	0.31	0	0	0	0	0	0	0	0	0.17	0
Prrc2c	0	0	0	0.1	0.21	0	0	0.14	0	0	0	0	0.09	0.03	0	0.02	0
Wdr19	0	0.24	0	0	0	0	0.27	0	0	0	0	0	0	0	0	0.11	0
Drg1	0.09	0	0	0	0.35	0.07	0	0.58	0	0	0	0	0	0	0.26	0	0.3
Ccdc127	0	0	0	0	0.41	0	0	0.23	0	0	0	0	0	0	0.44	0	0
Cbx6	0	0.78	0	0	0	0	0.45	0	0.1	0.05	0.08	0.11	0.11	0.1	0	0.49	0
Gfpt1	0	0.13	0	0	0	0	0	0	0	0	0	0	0	0	0	0.11	0
Hopx	0	0.23	0	0.08	0	0	0.57	0	0	0	0.27	0	0	0	0	0.06	0
Xpc	0	0.43	0.14	0	0	0	0	0	0	0	0	0.04	0	0	0	0.14	0
Hs3st5	0	0	0	0	0	0.45	0.17	0	0	0.51	0	0	0.83	0.48	0.51	0.19	0
Ncald	0.47	0	0.42	0.72	0.42	0.04	0.01	0	0	0	0	0	0	0	0	0	0
Tvp23a	0.01	0	0	0	0.28	0	0	0.59	0	0	0	0	0	0	0.25	0	0.03
Rcbtb1	0	0	0.36	0	0	0	0	0.11	0	0	0	0.27	0	0	0.01	0.01	0
Rtbdn	0	0	0	0.08	0.42	0	0	0.46	0	0.06	0	0	0	0	0	0	0.43
Maob	0	0.62	0	0	0	0	0.45	0	0.12	0	0	0.3	0.15	0	0	0.65	0
Styk1	0	0.44	0	0	0	0	0.63	0	0	0.03	0	0	0.45	0	0	0.36	0
Mettl25	0	0	0	0	0	0	0.12	0.16	0	0	0	0	0	0	0	0	0.16
Mllt10	0	0.18	0.01	0.12	0	0.04	0.21	0	0.12	0.07	0	0	0	0.04	0	0.21	0
Abca5	0	0.01	0	0.03	0	0	0	0	0	0	0	0.01	0.09	0	0	0.33	0
Mgat4d	0.36	0.8	0.29	0.26	0	0	0.27	0	0	0	0.12	0.04	0	0	0	0.14	0
Agap3	0	0	0	0	0.21	0	0	0.09	0	0	0	0	0	0	0.1	0	0
Zfp651	0	0	0	0	0.49	0.19	0	0.42	0.04	0	0	0	0	0	0.28	0	0.45
Zbtb20	0	0	0.05	0	0	0.08	0.39	0	0	0	0.35	0.29	0.24	0.25	0	0.25	0.54
Dok3	0.44	0	0	0	0.7	0.44	0	0.27	0	0	0	0	0	0	0.42	0	0
Slc22a15	0	0.24	0	0	0	0	0.56	0	0.04	0	0	0	0	0	0	0.43	0
Itpka	0.67	0	0	0	0	0.58	0	0.32	0	0	0	0	0.5	0.83	0.15	0	0
Arid1b	0	0.35	0.2	0	0	0	0.16	0	0	0	0	0	0.09	0	0	0.21	0
Mtmr2	0	0.05	0	0	0	0	0.06	0	0	0	0	0.05	0	0	0	0.13	0
Nwd2	0	0.11	0	0.68	0.73	0	0	0	0	0.16	0	0	0	0	0.89	0.44	0
Tmem50b	0	0.37	0.09	0	0	0	0.21	0	0	0	0.04	0.17	0.01	0	0	0.05	0
Ska2	0	0	0	0	0	0	0	0	0	0	0.47	0.15	0.66	0	0	0	0
Elmod1	0.21	0	0	0	0.14	0	0	0.01	0	0.16	0.49	0	0.02	0	0.29	0	0.36
Pcsk2	0.15	0.29	0.22	0	0	0.45	0.2	0	0.05	0	0	0.21	0	0	0	0	0.25
Rell1	0	0	0	0	0	0	0	0	0.64	0.01	0.29	0	0	0	0.72	0.37	0.26
Trpc1	0	0.36	0	0	0	0	0.07	0	0	0	0	0	0.14	0	0	0.29	0
Rab5b	0	0	0	0	0	0	0	0.21	0	0	0	0	0	0	0	0	0
Tcp11	0.22	0.7	0.23	0	0	0	0	0	0	0.06	0	0	0	0	0	0.43	0
Far2	0	0.13	0.12	0	0	0	0.35	0	0	0	0	0.29	0	0	0	0.21	0
Fjx1	0	0	0	0	0.22	0.36	0	0	0	0.15	0.29	0.7	0	0	0	0	0.76
Wdr46	0	0.48	0.03	0	0	0	0.22	0	0	0	0	0	0	0	0	0.14	0
Smarca2	0.04	0	0.26	0	0	0	0	0	0	0.21	0.07	0.1	0	0	0	0.12	0
Trak2	0	0.47	0	0.01	0	0	0.46	0	0	0	0	0	0	0	0	0.33	0
Cltb	0	0	0	0	0	0	0	0.18	0	0	0	0	0	0	0.17	0	0
Htra1	0	0	0	0.17	0	0	0	0	0.03	0	0.32	0	0	0	0	0.29	0.2
Gsn	0.07	0.37	0.22	0	0	0	0	0	0	0	0	0	0.07	0	0	0.04	0.14
Ocrl	0	0	0	0	0	0	0	0.37	0	0	0	0	0.2	0.25	0.14	0	0.16
Wdr27	0.05	0	0	0	0	0	0.14	0	0.05	0.18	0	0	0	0	0	0.11	0
Tgfbr1	0	0.22	0	0	0	0.77	0.25	0	0	0.15	0	0	0	0	0	0.04	0
Ccdc159	0.02	0	0	0	0.82	0	0	0.47	0.13	0.35	0	0	0	0	0.01	0	0
Cenpj	0.03	0.74	0	0.19	0	0	0.52	0	0	0	0	0.15	0	0	0	0.32	0
Cpsf3	0	0.09	0	0	0	0	0	0	0	0	0	0	0	0	0	0.09	0
Nutm1	0	0	0.69	0	0	0	0	0	0.04	0	0	0.34	0.31	0.26	0	0.47	0
Scn9a	0	0	0	0.24	0	0	0	0	0.01	0	0	0.18	0.39	0	0	0.2	0
Pmch	0	0	0	0	0.2	0	0	0.7	0.04	0.07	0.2	0	0	0	0.52	0	0.55
Tmc2	0	0.27	0	0.27	0	0	0.56	0	0	0	0	0.09	0	0.07	0	0	0
Utp23	0	0.46	0	0.03	0	0	0.19	0	0	0	0	0.17	0.06	0.04	0	0.33	0
Zc3h14	0	0.13	0	0	0	0	0	0	0	0	0	0	0	0	0	0	0
Chrna3	0.27	0.25	0.21	0	0.79	0	0.22	0.62	0	0.36	0	0	0	0	0	0.15	0
Strbp	0.19	0	0	0	0.24	0.21	0	0.35	0	0.18	0.1	0	0.05	0.11	0.24	0	0.28
Npc2	0	0	0.04	0.1	0.34	0	0	0.33	0	0	0.22	0	0	0	0.14	0	0
Tmed5	0	0	0	0	0.07	0	0	0.03	0	0	0	0	0	0	0.14	0	0.17
Grb10	0.14	0	0	0	0	0.2	0	0.22	0.13	0.18	0	0	0	0	0.02	0	0
Slc27a4	0	0.4	0	0.06	0	0	0.05	0	0	0	0	0	0	0	0	0.06	0
S100b	0	0	0	0	0	0.02	0	0.13	0	0	0	0	0	0	0.51	0.03	0.81
Tra2b	0	0	0	0	0	0.06	0	0.19	0	0.07	0	0	0	0	0.01	0	0.05
Ank1	0.42	0.07	0.24	0.72	0.03	0	0	0	0	0	0.05	0	0	0	0.17	0.04	0
Morn1	0.08	0	0	0	0.3	0.13	0	0.68	0.02	0	0	0	0	0	0	0	0.11
Rnf138	0.03	0	0	0	0.03	0	0	0.23	0	0	0	0	0	0	0.09	0	0
Plekha1	0	0	0	0.16	0.1	0	0	0	0	0	0	0	0	0	0	0.16	0
Morn2	0.47	0	0	0	0.56	0.15	0	0.81	0	0	0	0	0	0	0.31	0	0.03
BC051142	0.22	0	0.61	0.29	0.41	0	0	0.29	0	0	0.17	0	0	0	0	0.04	0
Eif3l	0	0.43	0.02	0	0	0	0.27	0	0.01	0	0	0	0	0	0	0.21	0
Pcdh19	0	0	0	0	0	0	0	0	0.22	0.34	0.68	0.42	0	0	0.2	0.1	0.45
Ccdc84	0	0.44	0	0.01	0	0	0.37	0	0	0	0	0	0	0	0	0.2	0
Pdcd7	0.17	0	0	0.45	0.39	0	0	0.03	0	0	0	0	0	0	0.39	0.01	0
Sh3glb1	0	0	0.11	0.09	0	0	0	0	0	0	0	0	0	0	0	0.2	0
Cops5	0	0	0	0	0.1	0	0	0.03	0	0	0	0	0	0	0	0	0
Prex2	0.06	0.01	0.41	0.5	0.96	0	0.37	0	0	0	0	0	0	0	0	0.04	0
Poc1b	0	0.44	0.18	0	0	0	0.16	0	0	0	0.01	0	0	0	0	0.52	0
Chmp2b	0	0.29	0	0	0	0	0	0	0	0	0	0	0.11	0.02	0	0	0
Slc27a5	0.32	0.34	0.57	0	0	0	0.65	0	0	0	0	0	0.05	0	0	0.23	0
Tbc1d14	0	0.19	0	0	0	0	0.05	0	0	0	0	0	0	0	0	0	0
Kcnj1	0.12	0.91	0	0.44	0	0	0	0	0	0	0	0	0.4	0.1	0	0	0
Csmd2	0	0.23	0.15	0	0	0	0.22	0	0.15	0	0.17	0	0	0	0	0.19	0
Tada2a	0	0	0	0	0	0	0	0.37	0	0	0	0	0	0	0.1	0	0.04
Ptpn21	0	0.24	0	0	0	0	0.12	0	0	0	0	0.07	0	0	0	0.35	0
Pde4b	0.21	0.22	0.03	0	0.17	0.17	0.24	0	0	0	0.2	0	0	0	0	0.21	0
Apoa1	0.27	0	0	0	0.09	0.15	0	0.02	0	0.02	0	0	0	0	0.95	0	0.03
Avp	0	0	0	0	0.19	0.01	0	0.73	0	0.15	0.06	0	0	0	0.49	0	0.57
Cdc14a	0	0	0	0.28	0	0	0	0	0	0	0	0	0.88	0	0	0.86	0
Muc3a	0.17	0	0.27	0.09	0	0.39	0.24	0	0	0	0	0	0.72	0	0	0.11	0
Mphosph8	0	0.08	0	0.13	0	0	0.09	0	0	0	0	0	0	0	0	0.02	0
Rab8b	0	0.17	0.02	0	0	0	0	0	0	0	0	0	0	0	0	0.28	0
Als2cl	0	0	0	0	0.45	0.01	0	0.73	0.51	0	0	0	0	0	0.2	0.01	0.03
Kl	0	0.26	0.43	0	0.24	0	0	0	0	0	0	0	0.99	0.18	0	0	0.54
Phactr4	0	0.74	0.17	0	0	0	0.17	0	0.04	0	0	0.31	0	0	0	0.48	0
Bmt2	0	0.07	0	0	0	0	0.11	0	0	0	0	0	0.22	0	0	0.13	0
Idh3g	0	0	0	0	0.53	0	0	0.23	0.05	0	0	0	0	0.18	0.38	0	0
Mcm3ap	0	0.11	0	0	0	0	0.05	0	0	0	0	0	0	0	0	0.2	0
Ptar1	0	0.01	0	0	0	0	0.08	0	0.1	0	0	0	0	0	0	0.54	0
Atl3	0	0	0	0	0.11	0	0	0.19	0	0	0	0	0	0	0.41	0	0
Tbx19	0	0.49	0.02	0.14	0	0	0.64	0	0.33	0.29	0	0	0.03	0	0	0.46	0
Plekhh3	0.07	0	0.2	0	0.03	0	0	0.83	0	0	0	0	0	0	0.3	0.06	0
Rabgap1l	0.19	0.23	0.14	0.1	0	0	0.22	0	0.16	0	0	0	0	0	0	0.23	0
Egfr	0	0	0	0	0	0	0	0	0.47	0.5	0.9	0.85	0.14	0	0	0.44	0
Lvrn	0	0.41	0	0	0	0	0	0	0	0	0.76	0.15	0.18	0	0	0.95	0
Nts	0	0.27	0	0.05	0.22	0	0	0	0	0	0	0	0	0	0.18	0	0.06
Lrsam1	0	0.6	0	0	0	0	0.48	0	0	0	0	0	0	0	0	0.36	0
Flt3	0	0	0	0	0	0	0	0.08	0	0.47	0	0	0	0	0.46	0.07	0
B4galt6	0	0.14	0	0.08	0.06	0	0.06	0	0	0	0	0	0	0	0	0.16	0
Rps15a	0	0.2	0	0	0	0	0.17	0	0.01	0	0	0	0	0	0	0.06	0
Cfap70	0	0.25	0	0	0	0	0.28	0	0.14	0	0	0	0.06	0	0	0.04	0
Zbtb46	0	0.28	0	0.45	0	0	0.71	0	0.37	0	0	0	0	0	0	0.33	0
Rhag	0	0	0	0	0	0	0	0	0	0	0.94	0	0	0.49	0	0.99	0
Klhl13	0.4	0.08	0	0	0	0.53	0	0	0	0	0	0.71	0	0	0	0.38	0
Pigs	0	0	0	0	0.3	0	0	0.28	0	0	0	0	0	0	0.12	0	0
Pigb	0	0	0	0	0.05	0	0	0.1	0	0	0	0	0	0	0.02	0	0
Rbl1	0	0.44	0	0.11	0	0	0.34	0	0	0.16	0	0	0	0	0	0.5	0
Wscd2	0.01	0.01	0	0	0	0.5	0	0	0	0.2	0	0	0	0	0	0	0
Myo1h	0.44	0.29	0.43	0.31	0.44	0.22	0	0.42	0.25	0	0	0	0	0	0	0	0
Tmem158	0	0	0	0	0.57	0	0	0.5	0.13	0	0	0	0	0	0	0	0.84
Kif5a	0.09	0	0	0.03	0.34	0	0	0.13	0	0.06	0	0	0	0	0.18	0	0
Smdt1	0	0	0	0	0.02	0	0	0	0	0	0	0	0	0	0.49	0	0.22
Rrp36	0	0.61	0.29	0	0	0	0.08	0	0	0	0	0	0	0	0	0.17	0
Pld5	0	0	0	0	0	0	0.46	0	0.08	0.18	0	0	0	0	0.43	0.16	0.84
Atp5c1	0	0	0	0	0	0	0	0.1	0	0	0	0	0	0	0.1	0	0
Gria3	0.35	0.02	0	0	0.2	0.66	0.27	0.14	0	0	0	0	0	0	0	0	0.5
Kcnc3	0	0	0	0	0.25	0.43	0	0.79	0	0	0	0	0	0	0.01	0	0.02
Polr2g	0	0	0	0	0	0	0	0.72	0	0.53	0	0	0	0	0.34	0	0.41
Stx6	0.01	0.01	0	0	0	0	0.05	0	0	0	0	0	0	0.04	0	0	0
Gpr139	0.37	0.31	0.52	0.09	0	0	0.27	0.05	0.19	0.13	0	0.17	0	0	0	0	0
Dbp	0	0	0	0	0.12	0	0	0.48	0.02	0.1	0	0	0	0	0.18	0	0.12
Ccdc88c	0	0.15	0.05	0	0	0	0	0	0	0	0.32	0.71	0.11	0	0.24	0.19	0
Stap2	0.07	0.86	0.86	0	0	0	0	0	0	0	0	0	0	0	0	0.15	0
Xrra1	0	0	0	0	0	0.67	0	0.75	0.4	0.02	0	0	0	0	0	0.09	0
Gramd1b	0.11	0.2	0.29	0.06	0	0	0	0	0	0	0	0	0	0	0	0.16	0
Nle1	0	0	0	0	0.69	0.36	0	0.36	0	0	0	0	0	0	0	0	0
Dynll2	0	0	0	0	0	0	0	0.5	0	0.12	0	0	0	0	0.07	0	0.24
Cacna1e	0	0	0.02	0	0	0.15	0	0.22	0.32	0.21	0.16	0	0	0.21	0	0	0
Mbnl1	0	0.23	0	0	0	0	0.11	0	0	0	0	0	0.06	0	0	0.08	0
Piwil1	0	0.69	0.83	0.04	0	0	0.18	0	0.14	0	0	0.24	0	0	0	0.05	0
Trp73	0	0.72	0	0.13	0	0	0.5	0	0.14	0	0	0	0	0	0	0.39	0
Rad54l2	0	0.15	0	0	0	0	0.25	0	0	0	0	0	0	0	0	0.14	0
Grm4	0.63	0.24	0	0	0	0.25	0.85	0	0	0	0.35	0	0	0	0	0.14	0
Shc1	0	0.38	0.21	0.18	0	0	0	0	0	0	0	0.28	0.24	0	0	0.23	0
Dnajc2	0	0.33	0	0	0	0	0.13	0	0.02	0	0	0	0	0	0	0.36	0
Polr2d	0	0.27	0.06	0	0	0	0.23	0	0	0	0.07	0	0	0	0	0.11	0
Itgb3bp	0	0	0	0	0.52	0.02	0	0.39	0	0	0	0	0	0	0	0	0
Tfr2	0.21	0.64	0.38	0	0	0.2	0	0	0	0	0.04	0	0	0	0	0	0
Stkld1	0	0.71	0	0.03	0	0.13	0.58	0	0	0	0	0	0	0.11	0	0.43	0
Snph	0.06	0.02	0.04	0	0	0.21	0	0.1	0	0	0	0	0	0	0.03	0	0
Etl4	0.55	0.09	0.19	0.82	0.88	0	0	0	0	0	0	0.32	0.1	0	0.05	0.29	0
Clstn1	0	0	0	0	0.05	0	0.08	0	0	0	0.14	0.14	0	0	0.03	0	0.15
Enpp5	0	0	0	0	0	0	0	0.41	0	0	0	0	0	0	0.33	0	0.21
Grik1	0.57	0.31	0.23	0.15	0.68	0	0	0	0	0	0	0.45	0.47	0.09	0.41	0.57	0
Cabp4	0.18	0.58	0.46	0.65	0	0	0.39	0	0	0	0	0	0	0	0	0.18	0
Manba	0	0	0	0.18	0	0	0	0	0.07	0	0	0	0	0	0	0.18	0
Wdr73	0.06	0	0	0	0.45	0	0	0.17	0	0	0	0	0	0	0	0	0.04
Col4a5	0.1	0.21	0.18	0	0	0	0	0	0	0	0	0	0	0.1	0.4	0.54	0.22
Ccdc36	0.02	0.39	0	0.08	0	0	0.29	0	0.24	0	0	0.05	0	0	0	0.52	0
Pwwp2a	0	0	0	0	0	0	0	0	0.61	0.19	0	0.03	0	0	0	0.12	0
Fkbp9	0	0.71	0.07	0.12	0	0	0.59	0	0.19	0.07	0	0	0	0	0	0.51	0
Bloc1s2	0.04	0	0	0	0.17	0	0	0.01	0	0	0	0	0	0	0.49	0	0.44
Mettl8	0	0.21	0	0	0	0	0.16	0	0.03	0	0	0	0	0	0	0.06	0
Kel	0	0.64	0.3	0.6	0	0	0	0	0	0	0	0.47	0	0	0	0.75	0
Gucy2c	0	0.29	0	0	0	0	0.39	0	0.11	0	0.1	0	0.5	0.24	0	0.46	0
Slamf8	0.31	0	0	0.3	0	0	0	0	0	0	0	0	0.96	0.7	0.37	0	0
Rraga	0	0	0	0	0	0	0	0.39	0	0	0	0	0	0	0.06	0	0.12
Sned1	0	0.37	0	0	0	0	0.33	0	0	0	0	0	0	0	0	0.21	0
Sept9	0.51	0.73	0.33	0	0	0	0	0	0	0	0.16	0.52	0	0	0	0.16	0
Sycp2	0.25	0	0.17	0.11	0.01	0	0	0.23	0	0	0	0	0	0	0.38	0	0.09
Nexmif	0.52	0	0	0	0.56	0	0	0.83	0	0	0	0	0	0.12	0.23	0	0.14
Uqcc1	0	0.02	0	0.06	0	0	0	0	0	0	0.17	0	0	0	0	0.24	0
Nfatc2	0	0	0	0	0	0.37	0	0.34	0	0.3	0	0	0	0	0.76	0	0.08
Gnpda2	0	0.59	0	0	0	0	0.46	0	0	0	0	0	0	0	0	0.35	0
Vwc2l	0.92	0.16	0.01	0.76	0	0	0.02	0	0	0.37	0	0	0	0	0	0.58	0
Chst1	0	0	0	0	0	0	0	0.27	0	0.08	0	0	0	0	0.05	0	0.23
Dusp18	0	0.66	0.06	0	0	0	0.39	0	0.04	0	0	0	0	0	0	0.54	0
Ddx50	0.08	0	0	0.07	0	0.13	0	0.16	0	0	0	0	0.06	0	0.05	0	0.18
Dct	0.06	0.81	0.35	0	0	0.09	0.21	0	0	0.33	0	0	0.16	0	0	0.45	0
Grin3a	0	0	0	0.46	0.64	0.53	0	0	0.43	0	0	0	0	0	0	0.26	0
Lactb2	0	0	0	0	0	0	0	0.17	0	0.48	0	0	0.01	0.5	0.28	0	0
Taf4b	0	0.25	0	0	0	0	0	0	0.53	0.08	0.03	0	0	0	0	0.2	0
Pqlc3	0	0.27	0.58	0	0	0	0	0	0	0	0	0.22	0	0	0	0.23	0
Olfm1	0	0	0	0.36	0.03	0	0	0	0	0	0	0	0	0	0.42	0	0.19
Hectd2	0.28	0.82	0.53	0.04	0	0	0.74	0	0	0	0	0	0	0	0	0.6	0
Farp2	0	0	0	0	0	0	0	0	0.05	0	0	0	0	0	0	0.01	0
Tcp11l1	0	0	0	0	0.02	0	0	0.69	0	0	0	0	0	0	0.3	0	0.05
Zfp462	0	0.06	0.09	0.38	0	0	0.41	0	0	0.06	0	0	0.33	0.28	0	0.15	0
Zdhhc21	0.01	0	0	0	0	0	0	0.07	0	0	0	0	0	0.04	0.16	0	0.38
Lrrc45	0.04	0	0	0	0.53	0	0	0.84	0	0	0	0	0	0	0.61	0	0
Wdr89	0	0	0	0	0.11	0	0	0.27	0	0	0	0	0	0	0.32	0	0.31
Slc35d1	0	0.35	0.36	0.13	0	0	0.2	0	0	0	0	0	0	0	0	0.28	0
Slco3a1	0.04	0.22	0	0	0	0.22	0.18	0	0	0	0	0	0	0	0	0.16	0
Actr1a	0	0	0	0	0.06	0	0	0.22	0	0	0	0	0	0.01	0	0	0.15
Car10	0.22	0	0	0	0	0.22	0.24	0.23	0.21	0.22	0.23	0.15	0	0.14	0.25	0	0.23
Cdk6	0	0.64	0	0.34	0	0.74	0.41	0	0.34	0.36	0	0	0	0	0	0.54	0
Gda	0	0	0	0	0	0.32	0.02	0.5	0.21	0.09	0	0	0.53	0.72	0	0	0
Srd5a3	0	0.71	0.12	0.02	0	0	0.41	0	0	0	0	0.03	0.03	0	0	0.41	0
Ccnb1	0	0.75	0.08	0.15	0	0.26	0.68	0	0.14	0.05	0	0.1	0	0	0	0.01	0
Myo7a	0	0.37	0	0	0	0.42	0.53	0	0	0	0	0	0	0	0	0.26	0
Fam120c	0.11	0	0	0	0.21	0	0	0.34	0	0	0	0	0	0	0.12	0	0.01
Fbxl20	0	0.1	0	0	0	0	0.14	0	0.05	0.07	0	0	0	0	0	0.08	0
Ttf1	0	0.51	0	0	0	0	0.38	0	0	0	0	0	0	0	0	0.01	0
Suz12	0	0.2	0	0	0	0	0.03	0	0	0	0	0	0	0	0	0.2	0
Cbr4	0	0.37	0	0.22	0	0	0.41	0	0	0	0	0.01	0	0	0	0.14	0
P2rx7	0	0	0	0.27	0	0	0	0	0	0	0.92	0.95	0	0	0	0.12	0
Chd7	0	0	0	0	0	0	0	0	0	0.27	0.96	0.16	0	0	0	0.75	0
Porcn	0	0	0	0	0.27	0.06	0	0.58	0	0.07	0	0	0	0	0.01	0	0
Dtwd2	0	0.36	0	0	0	0	0	0	0	0	0	0	0.03	0	0	0.5	0
Ppp6r1	0	0.36	0	0.05	0	0	0.25	0	0	0	0	0	0	0	0	0.05	0
Capn10	0	0	0	0	0	0	0	0.23	0	0	0	0	0	0	0.16	0	0.3
Fam171a1	0	0.32	0	0	0	0	0.06	0	0	0	0	0	0.1	0.1	0	0.12	0
Pou6f2	0.9	0.17	0.99	0	0	0	0	0	0	0	0	0.08	0	0	0	0.18	0
C1qc	0	0	0	0	0	0	0	0.24	0	0.17	0.7	0.08	0.03	0	0.11	0	0
Nme6	0	0.11	0.14	0.1	0	0	0.19	0	0	0	0	0	0	0	0	0.11	0
Rap1b	0	0.04	0	0	0.03	0	0	0	0	0	0	0	0	0	0	0.23	0
Atl1	0.02	0.07	0	0	0	0.11	0	0	0	0	0	0	0	0	0	0.06	0
Slc15a1	0.38	0.38	0	0	0	0	0	0	0.65	0.89	0	0	0	0	0	0.39	0
Dgki	0.21	0.23	0	0.23	0	0.21	0	0.16	0	0	0	0	0	0	0.18	0.18	0
Mpnd	0	0	0	0	0	0	0	0.1	0.01	0.63	0	0	0	0	0.24	0.08	0
Pebp1	0.08	0	0	0	0.24	0.14	0	0.64	0	0.05	0.01	0	0	0	0.36	0	0.48
Serinc5	0.03	0.76	0.8	0.38	0	0	0	0	0	0	0	0	0	0	0	0.04	0
Trps1	0	0	0	0	0	0	0	0	0	0	0	0	0.81	0.38	0	0.43	0
Srpx2	0	0.15	0.17	0.19	0	0	0.57	0	0.69	0.74	0.16	0	0	0	0	0	0
Zfp606	0	0.42	0	0	0	0	0.13	0	0	0	0	0.05	0	0	0	0.13	0
Crhr1	0.87	0.67	0.52	0.38	0	0	0	0	0	0	0	0	0	0	0	0.55	0
Sec63	0	0.2	0	0	0	0	0	0	0	0	0	0	0.05	0	0	0.13	0
Satb2	0.88	0.44	0	0	0	0	0.16	0.98	0.84	0	0	0	0	0	0	0.01	0
Fign	0.57	0	0	0	0.8	0	0	0.87	0.19	0.62	0	0.16	0	0	0	0.36	0
Cfap65	0.45	0	0	0	0.02	0.53	0	0.78	0.58	0.28	0	0	0	0	0	0	0
Ddah1	0	0	0	0	0	0	0	0	0.13	0	0	0.2	0	0	0	0	0
Tcaim	0	0.44	0.26	0	0	0	0.33	0	0	0	0	0	0	0	0	0.36	0
Ccdc77	0.23	0.26	0.07	0	0	0	0	0	0	0	0	0	0	0	0	0	0
Ttc19	0.11	0	0	0	0	0	0	0.13	0.02	0.15	0	0	0	0	0.19	0	0.08
Wdyhv1	0.28	0	0	0	0.38	0.38	0	0.56	0	0	0	0	0	0	0.22	0	0.03
Reln	0	0	0.66	0	0	0	0	0	0	0	0.98	0	0	0	0.27	0.12	0
Gnpnat1	0	0.21	0	0	0	0	0.07	0	0.04	0	0	0	0	0	0	0.26	0
Cdh12	0	0	0.17	0.85	0.83	0	0	0.43	0	0	0	0.46	0.2	0.74	0	0	0
Stat6	0	0.71	0.11	0.09	0	0.02	0.66	0	0.01	0	0	0	0	0	0	0.31	0
Syndig1	0.87	0	0	0.55	0.71	0	0	0	0.8	0	0	0	0	0	0	0.06	0
Gpr27	0.1	0	0	0	0.83	0	0	0.56	0.05	0	0	0	0	0	0.11	0	0.21
Aatf	0	0	0	0	0.02	0	0	0.21	0	0	0	0	0	0	0	0.01	0
Tmem245	0	0.17	0	0	0	0	0	0	0.03	0	0	0	0	0	0	0.13	0
Wdfy3	0.1	0.14	0.02	0.15	0	0.05	0.15	0	0	0	0	0	0	0	0	0.08	0
Cenpe	0	0.51	0.26	0.66	0	0	0.4	0	0	0	0.01	0.11	0	0	0	0.16	0
Smarca1	0	0.18	0.54	0	0	0	0	0	0	0	0	0	0	0	0	0	0
Nf2	0	0.08	0	0	0	0	0.03	0	0	0	0	0	0	0.22	0	0.09	0
Tmem259	0	0.12	0	0	0	0	0	0	0	0	0	0	0	0	0	0	0
Ackr4	0.1	0	0.16	0	0.02	0.17	0	0.65	0	0.16	0	0	0	0	0.22	0	0.12
Zhx1	0	0.72	0.12	0	0	0	0.38	0	0.16	0	0.06	0.18	0	0	0	0.5	0
Galnt11	0	0.25	0	0.08	0	0	0	0	0	0	0	0	0	0	0	0.2	0
Brwd3	0	0.04	0	0.13	0	0	0.05	0	0	0	0	0	0.14	0	0	0.26	0
Ttll10	0	0.3	0	0	0	0	0.51	0	0.59	0.09	0	0	0	0	0	0.76	0
Trp53bp1	0	0.32	0.08	0.01	0	0	0.04	0	0	0	0.03	0	0	0	0	0.2	0
Maff	0.04	0.8	0.22	0.08	0	0	0.68	0	0	0	0	0	0	0	0	0	0
Trip12	0	0.11	0	0.11	0	0.12	0.14	0	0	0	0	0	0	0	0	0.17	0
Atrn	0	0.09	0	0.01	0	0.01	0.07	0	0	0	0	0	0	0	0	0.07	0
Phkb	0	0.15	0.08	0	0	0	0	0	0.03	0.2	0	0	0	0	0	0.23	0
Epb41l4a	0.16	0.85	0.33	0.24	0	0.19	0	0	0	0	0	0	0	0	0	0.23	0
Creb3l1	0.32	0.94	0.94	0.72	0	0	0	0	0	0	0	0	0	0	0	0	0
Cyb5r4	0	0.56	0	0	0	0	0.29	0	0	0	0	0	0	0	0	0.43	0
Wdr70	0	0.42	0.01	0	0	0	0.31	0	0	0	0	0	0	0	0	0.3	0
Ndufs1	0	0	0	0	0.09	0	0	0.03	0	0	0	0	0	0.02	0.13	0	0.05
Zfp804b	0	0	0	0	0	0	0	0	0	0	0.9	0.5	0.77	0.44	0	0.34	0.27
Pdk1	0	0	0	0	0	0	0	0	0	0	0	0	0	0	0	0	0.81
Hsd17b14	0.79	0.6	0.22	0	0	0.01	0.23	0	0	0	0	0	0	0	0	0.04	0
Pi16	0	0	0	0	0.01	0	0.08	0.15	0.51	0.74	0	0	0	0	0	0	0.18
Rpp30	0	0.32	0	0	0	0	0.16	0	0	0	0	0	0	0	0	0.16	0
Ostc	0	0	0.08	0	0.26	0	0	0.03	0	0	0	0	0	0	0.33	0	0.17
Trnau1ap	0	0.29	0	0	0	0	0	0	0	0	0	0	0	0	0	0.2	0
Lamb1	0	0.5	0	0	0	0	0	0	0.07	0.1	0	0.21	0.86	0.6	0	0.2	0
Nrg4	0	0.69	0	0	0	0	0.56	0	0.1	0	0	0.06	0	0	0	0.6	0
Cep112	0	0.18	0	0	0	0	0	0	0.08	0.18	0	0	0	0.29	0	0.29	0
Vti1a	0	0.33	0.03	0	0	0.03	0.19	0	0	0.05	0	0	0	0	0	0.21	0
P2ry14	0.05	0	0	0	0.12	0.36	0	0.71	0	0.15	0	0	0	0	0.67	0	0.7
Cct6b	0	0.15	0.01	0.04	0	0	0.31	0	0.16	0.26	0	0.06	0.14	0	0	0.54	0
Cpz	0.82	0.54	0.33	0.4	0	0	0.76	0	0	0	0	0	0	0	0	0	0
Rgs17	0	0	0	0	0	0	0	0	0	0	0.11	0	0.13	0	0.03	0.22	0
Mycbp2	0	0.22	0.06	0.2	0.08	0.12	0.23	0	0.18	0	0.14	0.14	0.12	0	0	0.19	0
Smug1	0.28	0	0	0	0.22	0.24	0	0.39	0.14	0.25	0	0	0	0	0.19	0	0
Dhdds	0	0	0	0	0	0.09	0	0.16	0	0	0	0	0	0	0	0	0
Trnt1	0	0.21	0	0	0	0	0.2	0	0	0	0	0	0	0	0	0.06	0
4930404N11Rik	0	0.51	0	0	0	0	0.13	0	0	0	0	0.15	0	0	0	0.16	0
Eva1b	0	0	0	0	0.36	0	0	0.67	0	0	0	0	0.87	0.45	0.39	0	0
Fam234b	0.05	0	0	0	0.38	0.05	0	0.28	0	0	0	0	0.15	0.26	0.32	0	0.24
Htr3a	0	0	0	0	0.44	0	0	0	0	0	0.82	0	0	0	0	0.85	0
Ndfip2	0	0	0	0	0.25	0	0	0.23	0	0	0.04	0	0	0	0.23	0	0.24
Micall1	0	0.3	0.08	0	0	0	0	0	0	0	0	0	0	0	0	0.16	0
Golph3	0	0.27	0	0	0	0	0.07	0	0	0	0	0	0	0	0	0.43	0
Arvcf	0	0	0	0	0	0	0	0	0.09	0.18	0	0	0	0	0.15	0	0
Lhpp	0	0.85	0.43	0	0	0	0.37	0	0	0	0	0	0	0	0	0.35	0
Rassf5	0.09	0.45	0	0.21	0	0	0.16	0	0	0	0	0	0	0	0	0.24	0
Timm8b	0.06	0	0	0	0	0	0	0.04	0	0	0	0	0	0	0	0	0.28
Sv2b	0.24	0	0	0.6	0.62	0	0	0	0.76	0	0.79	0.01	0	0	0	0.48	0
Lmtk3	0	0	0	0	0.02	0.09	0	0.18	0	0	0	0	0	0	0.01	0	0
Ahctf1	0	0.17	0.01	0	0	0	0	0	0	0	0	0	0	0	0	0.01	0
Snx18	0	0.54	0.06	0	0	0	0.35	0	0	0	0	0	0	0	0	0.5	0
Sema6a	0	0	0	0	0.5	0	0	0.61	0.1	0	0	0.1	0	0	0.42	0	0
Cpne5	0	0.04	0	0	0.26	0	0.03	0	0	0	0	0.3	0.93	0	0.07	0.22	0
Pcyt1a	0	0.08	0	0	0	0	0	0	0	0	0	0	0	0	0	0.11	0
Riiad1	0	0	0	0	0.15	0	0	0.58	0.47	0	0	0	0	0	0.45	0.06	0.39
Ankrd46	0	0.66	0.35	0	0	0	0	0	0	0	0	0	0	0	0	0.06	0
Efcab1	0.55	0	0	0	0.6	0.04	0	0.88	0.07	0	0	0	0	0	0.47	0	0.25
Gng3	0.02	0	0	0	0	0.01	0	0.45	0	0.01	0	0	0	0.01	0.38	0	0.43
Cfl2	0	0	0	0	0.18	0	0	0.19	0	0	0	0	0	0	0.57	0	0.68
Scn3a	0	0	0	0	0	0	0	0.29	0.13	0.21	0	0	0	0	0.05	0	0
Luc7l	0	0.11	0	0	0	0	0	0	0	0.02	0	0	0	0	0	0	0
Cops6	0	0.69	0	0.11	0	0	0.49	0	0.01	0	0	0	0	0	0	0.16	0
Haghl	0.09	0	0	0	0.01	0	0	0.16	0	0.18	0	0	0	0	0.32	0	0.04
Clk1	0	0	0	0	0.09	0.05	0	0.23	0	0	0	0	0.04	0	0.19	0	0
Smad3	0	0	0	0	0	0.5	0	0.89	0.41	0.59	0	0	0	0.45	0.27	0	0.1
Birc6	0	0.18	0	0.15	0	0	0.19	0	0.03	0	0	0	0.05	0	0	0.2	0
Celsr3	0	0	0	0	0.31	0	0	0.7	0	0	0	0	0	0	0.33	0	0.46
Zfand4	0	0.31	0	0.17	0	0	0.27	0	0	0	0.04	0	0	0	0	0.19	0
Btbd11	0	0	0	0	0	0.13	0	0.35	0.51	0.2	0.28	0	0	0	0.08	0	0.1
Rrnad1	0	0	0	0	0.27	0.04	0	0.38	0	0	0	0	0	0	0.15	0	0.07
Dlg3	0	0.45	0	0	0	0	0.07	0	0.03	0	0	0	0	0	0	0.18	0
Sgk2	0.06	0.55	0.35	0.31	0	0	0.38	0	0.14	0	0	0.02	0	0	0	0.37	0
Vrk1	0.03	0.56	0.15	0	0	0	0	0	0	0	0	0	0	0	0	0.28	0
Unc5b	0	0.05	0.1	0	0.97	0	0.11	0	0	0.14	0.08	0	0	0	0	0.18	0
Jmy	0	0.15	0	0	0	0	0	0	0	0	0	0.11	0	0	0	0.11	0
Tuba8	0.1	0.68	0	0.23	0	0	0.84	0	0	0	0	0	0	0	0	0.26	0
Lrrc28	0	0.22	0.09	0	0	0	0.02	0	0	0	0	0	0	0	0	0.13	0
Zkscan5	0	0.22	0	0	0	0	0.21	0	0.01	0	0	0.1	0	0	0	0.06	0
Slc11a1	0.11	0.47	0	0	0	0	0.71	0	0	0	0.13	0	0	0	0	0.4	0
Men1	0.09	0	0	0	0	0	0	0.68	0	0	0	0	0	0.12	0.46	0	0.61
Gpank1	0	0.28	0.06	0	0	0	0.21	0	0	0	0	0	0	0	0	0	0
Aipl1	0	0.78	0	0	0	0.22	0.72	0	0.56	0	0	0	0	0	0	0	0
St6galnac5	0.49	0.46	0	0	0.3	0.05	0	0.2	0	0.5	0	0	0	0	0.06	0.18	0
Foxk1	0	0.2	0	0	0	0	0.17	0	0	0	0	0	0	0.07	0	0.02	0
Plat	0.24	0	0.09	0	0.55	0.28	0	0.87	0	0	0	0	0	0	0	0	0
Mblac2	0.02	0	0	0	0.12	0	0	0.43	0	0.14	0	0	0	0.04	0.42	0	0
Sst	0.46	0.22	0.5	0	0.13	0	0	0	0	0	0.04	0	0	0	0	0	0.18
Btbd7	0	0	0	0	0	0	0	0.02	0	0	0	0	0.06	0.16	0	0	0.07
Gabarapl1	0	0	0	0	0	0	0	0.33	0	0.12	0	0	0	0	0.02	0	0.32
Cblb	0	0.29	0	0.49	0	0	0.04	0	0	0	0	0.22	0.05	0	0	0.06	0
Zfp583	0	0.33	0	0	0	0	0.03	0	0	0	0	0	0	0	0	0.12	0
Rspo3	0	0	0	0.53	0	0	0.33	0	0	0.01	0	0	0.82	0.02	0	0.4	0.94
Nab1	0	0	0	0	0	0	0.3	0.04	0.36	0.06	0.05	0	0	0	0	0.34	0
G0s2	0	0	0	0	0	0	0	0.08	0.06	0	0.47	0	0	0	0.75	0.22	0
Efnb3	0	0	0	0	0.64	0	0	0.18	0	0	0.04	0	0	0	0	0	0
Col2a1	0	0	0	0.89	1	0	0	0	0	0	0	0	0	0	0.02	0	0
Per2	0	0	0	0	0	0	0	0	0	0	0.67	0.54	0	0	0	0.78	0
Spi1	0.02	0.29	0	0.19	0	0	0.55	0	0	0.15	0	0	0.06	0.14	0	0.37	0
Arhgap12	0	0	0.14	0	0	0	0	0	0	0	0	0.13	0.06	0	0	0.05	0
1110065P20Rik	0	0	0	0	0.34	0.03	0	0.41	0.06	0	0	0	0	0	0.56	0	0.69
Ptprm	0	0.22	0.38	0	0	0.16	0.31	0	0	0.19	0	0	0.51	0.54	0.12	0.18	0.03
Spry2	0.15	0	0	0.38	0.15	0	0.32	0	0	0	0.78	0	0	0	0	0.46	0
Coro2b	0	0.04	0	0	0	0	0	0	0	0	0	0	0	0	0	0.06	0
Nell2	0.21	0.19	0.21	0.39	0	0	0.22	0	0	0	0	0.12	0.01	0	0.08	0	0
Cfap77	0	0	0	0	0.46	0	0	0.12	0.25	0	0	0	0.18	0	0.2	0	0.16
Abcc2	0.12	0.79	0	0	0	0	0.15	0	0.12	0	0.1	0	0	0	0	0.32	0
Acap1	0	0.77	0.35	0.22	0	0	0.32	0	0	0	0	0	0.06	0	0	0.52	0
Scai	0.09	0.12	0.16	0.21	0	0	0.19	0	0	0	0	0	0	0	0	0.04	0
Epc2	0	0.19	0	0	0	0	0	0	0	0	0	0.05	0	0	0	0.16	0
Vcan	0	0	0	0	0	0	0	0	0	0	0.31	0.63	1	0.21	0.8	0	0
Smg6	0.03	0	0	0.13	0.13	0.04	0	0.15	0	0	0.12	0.02	0	0	0.03	0	0.14
Agbl5	0	0	0	0	0.22	0	0	0.52	0	0	0	0	0	0	0	0	0
Rfesd	0	0	0	0	0.26	0	0	0.25	0.09	0	0	0	0	0	0.42	0	0.06
Hif1a	0	0.15	0	0	0	0	0.02	0	0	0	0	0	0	0	0	0.03	0.02
Mbnl3	0	0.35	0.31	0.16	0	0	0.86	0	0	0	0	0	0.82	0.41	0	0.52	0
Syt16	0	0.23	0.12	0.14	0	0	0.14	0	0.1	0	0	0	0	0	0	0.14	0
Cttnbp2nl	0	0.21	0	0	0	0	0	0	0	0	0	0.04	0.02	0	0	0.46	0
Abcg5	0	0.87	0.23	0.07	0	0	0.53	0	0.09	0	0.02	0.07	0	0	0	0.07	0
Pik3c2a	0	0	0	0	0	0.12	0.11	0	0	0	0	0	0.04	0.11	0	0	0
Nin	0	0	0	0	0	0.14	0	0	0.01	0	0	0.1	0	0	0.02	0	0
Mindy3	0	0.33	0	0	0	0	0.25	0	0	0	0	0	0	0	0	0.45	0
Taz	0.17	0	0	0	0.14	0	0	0.49	0	0	0	0	0	0	0.47	0	0.06
Parg	0	0.3	0.05	0	0	0	0.01	0	0	0	0	0	0	0	0	0.14	0
Mapk4	0.04	0.06	0	0	0	0	0	0	0	0	0.78	0	0	0.47	0	0	0
Grik4	0	0.29	0.21	0	0	0.22	0.23	0	0.09	0	0	0	0	0	0	0.02	0
Sfmbt2	0	0.78	0.46	0	0	0	0.29	0	0	0	0	0	0.03	0.19	0	0.3	0
Ginm1	0	0.24	0.14	0	0	0	0	0	0	0	0	0	0	0	0	0.09	0
Fank1	0.03	0.41	0	0	0	0	0	0	0.44	0	0	0	0	0	0	0.12	0
Ost4	0.07	0	0	0	0.4	0	0	0.61	0	0	0	0	0	0	0.03	0	0
Rrm2b	0	0	0	0	0	0	0	0.26	0	0	0	0	0	0	0.24	0	0.52
Nrg1	0	0	0	0	0.27	0.14	0	0.6	0.01	0.23	0.11	0	0.53	0	0.33	0	0.41
Plekhm3	0	0.24	0.18	0	0	0	0	0	0	0	0	0.05	0.04	0	0	0.1	0
Trp53inp2	0	0	0	0.08	0.24	0	0	0.47	0	0	0	0	0	0	0.49	0	0
Wdr11	0	0.36	0	0	0	0	0	0	0	0	0	0	0	0	0	0.11	0
Rbm6	0	0.04	0	0.13	0	0	0.14	0	0	0	0	0	0	0.14	0	0.14	0
Rorb	0	0	0.54	0.85	0	0	0.99	0	0	0.67	0	0	0	0	0.71	0.56	0
Rab11fip3	0	0.05	0.13	0.04	0	0	0	0	0	0	0	0	0	0	0.01	0.07	0
Paox	0	0.85	0.06	0	0	0	0.24	0	0	0	0	0.15	0	0	0	0.38	0
Ndnf	0	0	0	0	0.04	0	0	0	0	0	0.56	0.96	0	0	0	0.15	0
Dpf1	0	0.05	0	0	0	0	0.05	0	0.04	0.3	0	0	0	0	0	0	0
Kpna6	0	0.25	0	0	0	0	0.14	0	0	0	0	0	0	0	0	0.13	0
Dst	0	0.2	0.1	0.22	0	0	0.23	0	0.16	0.14	0.09	0	0	0	0	0.22	0
Bcl2l11	0.44	0	0.22	0.71	0	0	0	0	0	0	0.73	0.43	0	0	0	0.33	0.01
Maml1	0	0.04	0	0	0	0	0.05	0	0.11	0	0	0	0	0	0	0.15	0
Atp6v1h	0	0.05	0	0	0	0.02	0.09	0	0	0	0	0	0	0	0	0.16	0
Adora2b	0	0.79	0	0.04	0	0	0.54	0	0.05	0	0	0	0.14	0	0	0.61	0
Naalad2	0	0.32	0	0.4	0	0	0.8	0	0	0	0.15	0.21	0.12	0	0	0.51	0
Usp10	0	0.83	0.04	0.02	0	0	0.71	0	0.13	0	0	0.15	0	0	0	0.64	0
Rarres1	0	0.83	0.29	0.13	0	0	0.36	0	0.06	0	0	0	0	0	0	0.42	0
Dclk3	0.48	0	0	0	0.08	0.51	0.02	0	0	0	0	0	0.65	0.42	0	0.01	0
Ddx21	0	0.43	0	0	0	0	0.36	0	0	0	0	0	0	0	0	0.04	0
Napepld	0	0	0	0	0	0	0	0	0.32	0.6	0.38	0.56	0	0	0	0.15	0
Sqle	0	0	0	0	0.04	0.06	0	0.09	0	0.34	0	0	0	0	0.21	0.01	0
Agbl4	0.15	0.23	0	0	0	0	0.23	0	0.16	0	0.09	0.23	0.21	0	0	0.24	0
Ccdc171	0	0.04	0.42	0	0	0.51	0	0	0	0	0	0.03	0.04	0.04	0	0.05	0
Rbks	0	0.14	0	0.03	0	0	0.35	0	0	0	0	0	0.13	0	0	0.5	0
Ltbr	0	0.87	0.18	0	0	0	0.18	0	0	0	0	0.76	0	0	0	0.42	0
Tiparp	0.09	0.12	0.23	0	0.46	0.04	0	0	0	0	0	0	0	0	0	0.6	0
Esyt2	0	0	0	0	0.05	0	0	0.01	0	0	0	0	0.3	0.01	0.14	0	0
Lca5	0	0.2	0.04	0	0	0.13	0.02	0.07	0	0.03	0	0	0	0	0	0.04	0
Zswim4	0	0.28	0	0	0.07	0	0.24	0	0	0	0	0	0	0	0	0.16	0
Ak7	0	0.04	0	0	0	0.22	0	0.08	0	0	0	0	0	0	0.17	0.14	0
Thbs4	0	0	0.89	0.98	0.12	0	0.57	0	0	0	0	0	0	0	0	0	0
Ros1	0	0.32	0	0.52	0	0	0.06	0	0.15	0	0.23	0	0	0	0.26	0.06	0.87
Alox5	0.4	0.71	0.8	0	0	0	0.32	0	0	0	0	0	0	0	0	0	0
Sft2d2	0	0.04	0	0.07	0	0	0.26	0	0	0.03	0	0	0	0.84	0	0.38	0
Kdm5c	0	0	0	0	0.16	0.08	0	0.33	0	0	0	0	0	0.1	0.19	0	0
Gipc1	0	0.77	0	0	0	0	0.2	0	0	0	0	0	0	0	0	0.2	0
Zpbp	0.3	0.28	0	0	0	0	0	0	0	0	0	0	0.51	0	0	0.12	0
Frat2	0	0	0	0	0.67	0.27	0	0.55	0.16	0.1	0	0	0.06	0.64	0.39	0	0
Samd3	0	0.75	0.29	0.35	0	0.4	0.29	0	0	0	0	0	0.19	0	0	0.35	0
Rps6ka2	0	0.07	0	0	0	0.06	0	0	0.73	0.43	0	0.05	0	0	0	0.08	0
Slc39a12	0.31	0	0	0	0.94	0.1	0	0.17	0	0	0	0	0	0.46	0	0	0.41
Pxmp4	0	0.1	0	0	0	0	0	0	0	0	0	0	0.42	0	0	0.15	0
Slc38a10	0.27	0.4	0.17	0	0	0	0.01	0	0	0	0	0	0	0	0	0.03	0
Dera	0.14	0	0	0.12	0	0.19	0.08	0	0.38	0	0	0	0	0.8	0	0.1	0
Psmd9	0.15	0	0	0	0	0.14	0	0.26	0	0.02	0	0	0	0.06	0.07	0	0
Coro2a	0.06	0	0	0	0.01	0	0	0	0	0.07	0	0	0	0	0.05	0	0
Efcab6	0	0.36	0	0	0	0	0	0	0	0	0	0	0.47	0	0	0.05	0
Slc25a53	0	0	0	0	0.5	0.18	0	0.25	0.05	0.02	0	0	0	0	0.06	0	0.14
Cpsf4l	0	0	0.14	0	0.46	0.11	0	0.6	0.07	0.01	0	0	0	0.09	0.5	0	0
Atraid	0	0	0	0	0.55	0.07	0	0.74	0	0	0	0	0	0	0.29	0	0.45
Ash1l	0	0.23	0	0.05	0	0	0.23	0	0	0	0	0	0	0	0	0.22	0
Dscam	0.2	0.24	0	0.23	0	0	0.25	0	0.16	0	0.07	0	0	0	0	0.24	0
Zwilch	0.02	0.14	0	0	0	0.38	0	0.18	0	0	0	0	0	0	0.28	0.13	0
Sypl2	0	0.35	0	0.74	0	0	0.5	0	0.12	0	0	0.16	0	0	0	0.46	0
Itgb1	0	0	0	0	0.13	0	0	0	0	0	0	0	0	0.01	0.09	0.03	0.05
Pnma1	0	0.45	0.14	0	0	0	0.07	0	0.03	0	0	0	0.04	0	0	0.11	0
Stmn1	0	0	0	0	0	0	0	0.14	0	0	0.01	0.13	0	0	0	0	0.28
Prss53	0	0.94	0.06	0.13	0	0	0.72	0	0.09	0	0	0.08	0	0	0	0.49	0
Anxa4	0	0	0	0	0	0	0	0.36	0.58	0	0	0.24	0.26	0.08	0	0	0.51
Pecr	0	0.4	0	0	0	0	0.21	0	0	0	0.02	0	0	0	0	0.27	0
Noc2l	0.01	0	0	0	0	0.09	0	0.33	0	0	0	0	0	0	0.22	0	0
Rexo2	0	0	0	0	0	0	0	0.28	0.06	0.1	0.01	0	0	0	0	0	0.21
Ddx18	0	0.33	0	0	0	0	0.02	0	0	0	0	0	0	0	0	0.23	0
Hsf4	0	0.58	0	0.09	0	0.06	0	0	0.52	0	0	0	0.1	0	0	0.05	0
Adamts3	0.19	0	0	0	0	0	0	0.07	0	0	0.46	0	0.83	0.65	0	0	0
Slc6a15	0	0.2	0	0	0	0	0	0	0	0	0	0.07	0	0	0	0	0
Pkd2	0	0	0	0	0	0	0.34	0	0	0	0	0	0	0	0	0.33	0
Zeb1	0.24	0	0	0	0.06	0	0	0.11	0	0	0.15	0	0	0	0.2	0	0
Tex10	0	0	0	0	0	0	0	0.22	0	0	0	0	0	0	0	0.05	0
Ect2	0	0.72	0.09	0	0	0	0.38	0	0	0	0	0.15	0.05	0	0	0.58	0
Foxred1	0	0.46	0	0.31	0	0	0.41	0	0	0	0	0	0	0	0	0.42	0
Alkbh1	0	0	0	0	0	0.11	0	0.19	0	0	0	0	0	0.04	0.06	0	0
Fam13b	0	0.25	0.18	0	0.01	0	0	0	0	0	0	0	0	0	0	0	0
Pcca	0	0.16	0	0.01	0	0	0.09	0	0	0	0	0	0.11	0.19	0	0.22	0
Cdkn1c	0.1	0	0	0	0	0	0	0	0	0	0.51	0.94	0	0	0	0	0
Fancc	0	0.74	0.14	0	0	0	0	0	0.1	0	0	0.2	0.04	0	0	0.4	0
Extl3	0	0	0	0	0	0	0	0.05	0	0	0	0	0	0.1	0	0.03	0
Arpin	0	0.67	0	0.14	0	0	0.45	0	0.06	0.09	0	0	0	0	0	0.51	0
Bptf	0	0.15	0	0	0	0	0.08	0	0.01	0	0	0	0	0	0	0.04	0
Cers4	0.15	0	0	0.25	0.14	0	0	0	0	0	0	0	0	0	0	0	0
Crim1	0	0.51	0	0	0	0	0	0	0.51	0	0	0	0	0	0	0	0
Efhc1	0	0.51	0.56	0	0	0	0.09	0	0	0	0	0.02	0.51	0	0	0.35	0
Samm50	0	0	0	0	0.57	0	0	0.09	0	0	0	0	0	0	0	0.03	0.04
Poli	0	0.46	0.02	0	0	0	0.24	0	0.12	0	0	0.12	0	0	0	0.12	0
Dnah5	0.51	0.31	0	0	0.23	0	0	0	0	0	0.15	0	0	0	0	0.04	0
Asap2	0	0.04	0	0.52	0	0	0.44	0	0	0	0	0	0	0	0	0.33	0
Zfp148	0	0.16	0	0	0	0.04	0.16	0	0	0	0	0	0	0	0	0.17	0
Tsacc	0	0	0	0	0.11	0.33	0	0.33	0.36	0	0	0	0	0.32	0	0	0
Ubtd2	0	0.18	0.02	0	0	0	0.39	0	0	0	0	0	0	0	0	0.45	0
Scamp5	0	0.14	0	0.09	0	0	0	0	0	0	0	0	0	0	0	0	0
Atxn2	0	0.23	0	0.13	0	0	0.2	0	0	0	0	0	0	0	0	0.21	0
Lrpap1	0	0	0	0	0.12	0	0	0.34	0	0.06	0.18	0	0	0	0.15	0	0.36
Tmpo	0	0	0	0	0	0	0	0.05	0	0	0	0.1	0.46	0	0	0.1	0
Exph5	0.04	0.47	0.11	0.24	0	0	0.28	0	0	0	0.04	0	0.8	0	0	0.54	0
Aig1	0	0.18	0.04	0.1	0	0	0.22	0	0	0	0	0.16	0.14	0	0	0.21	0
Fam222a	0	0.19	0	0	0	0	0	0	0.12	0.68	0	0	0	0	0	0.45	0
Uqcrb	0	0	0	0	0.04	0.2	0	0.18	0	0.05	0	0	0	0	0.12	0	0.39
Mttp	0	0	0	0	0.57	0	0	0.7	0.05	0.1	0	0	0.02	0	0.49	0	0.34
Tmem219	0	0	0	0.2	0.9	0	0.12	0.46	0	0.12	0	0	0	0	0	0	0
Nme4	0	0.65	0	0.15	0	0	0.18	0	0	0	0	0	0	0	0	0	0
Peli1	0	0	0	0	0	0	0	0.35	0.21	0.12	0	0	0	0	0	0	0.22
Nxph1	0	0.29	0.3	0.6	0	0.4	0.46	0	0	0	0.78	0.54	0	0.45	0	0.25	0
Rprm	0.36	0.15	0.75	0.86	0.34	0.18	0.16	0	0	0	0	0	0	0	0	0	0
Nkain4	0.06	0	0	0	0	0	0	0.67	0	0	0.08	0	0	0	0.53	0	0.41
Aff4	0.05	0	0	0	0.12	0.09	0	0.2	0	0	0	0	0	0	0.09	0	0
Tbc1d2	0	0.26	0.13	0	0	0	0.02	0	0.48	0.25	0	0	0	0	0	0.23	0
Dcc	0.24	0	0.41	0.12	0	0	0	0.23	0	0	0.56	0.62	0	0	0	0.08	0.03
Utrn	0	0.07	0	0.08	0.17	0.67	0.97	0	0	0	0	0	0	0.12	0	0.1	0.89
Dsg2	0.91	0	0	0	0	0	0.61	0	0.08	0	0	0	0	0.59	0	0	0.37
Cep72	0	0.83	0.3	0.06	0	0.25	0.52	0	0.07	0	0	0	0	0	0	0.16	0
Gabbr2	0	0	0	0	0	0.16	0.2	0	0.14	0	0	0	0	0	0	0.22	0
Plcg1	0	0	0.08	0.01	0.19	0	0	0.05	0	0	0	0	0	0	0.02	0	0
Sfrp1	0.3	0.47	0.95	0	0	0	0.15	0	0	0	0	0	0.23	0	0	0.13	0
Lsr	0.41	0.61	0	0.14	0	0	0.27	0	0	0	0	0	0	0	0	0.13	0
Rsrp1	0.09	0	0	0.07	0	0	0.07	0.19	0.18	0.23	0.03	0	0	0.16	0.23	0	0
Sugct	0	0.45	0	0.37	0	0	0.28	0	0	0	0.08	0.21	0	0	0	0.69	0
Cyb5b	0	0.27	0	0	0	0	0.06	0	0	0	0	0	0	0	0	0.21	0
Bpifb2	0.58	0	0	0	0	0	0	0	0	0	0.92	0	0	0	0	0	0.62
Lrrtm1	0	0	0	0.18	0.49	0	0	0.68	0.11	0	0	0	0.15	0	0.82	0	0
Mrps6	0	0.61	0	0	0	0	0.49	0	0.19	0.01	0.13	0.14	0.03	0	0	0.65	0
Bmp2k	0	0.63	0.21	0	0	0	0.27	0	0	0	0	0	0	0	0	0.6	0
Nlrp12	0.15	0.88	0.94	0.77	0	0	0.13	0	0	0	0	0	0	0	0	0	0
Kcng1	0	0.51	0	0	0	0	0	0	0	0	0	0.42	0.16	0	0	0.84	0
Bmp3	0.29	0	0	0	0	0	0	0	0	0	0.49	0.59	0.94	0.19	0.58	0.37	0
Plet1	0	0.33	0	0	0	0.01	0.38	0	0	0	0	0	0	0	0	0.87	0
Thbs2	0	0.03	0	0	0	0.86	0.51	0	0.46	0.4	0.46	0	0	0	0	0.59	0
Hsp90b1	0	0	0	0	0.26	0	0	0.08	0	0	0.25	0.01	0	0	0.17	0	0.45
Gtf2h3	0	0.27	0	0.08	0	0	0	0	0	0	0	0	0	0	0	0.09	0
Ntrk2	0	0.22	0	0	0	0	0.04	0	0	0	0.08	0.19	0.21	0.18	0	0.25	0
Nrip3	0	0	0	0.2	0	0	0	0	0	0	0	0.11	0.29	0	0.63	0	0
Vcl	0	0.39	0	0.14	0	0	0.26	0	0.07	0	0	0	0	0	0	0.4	0
Ddo	0	0	0	0	0.82	0	0	0.65	0.64	0	0.83	0	0	0	0	0.03	0
Aatk	0	0	0	0.08	0	0	0.2	0	0	0	0	0	0	0	0	0	0
Prpf8	0	0.12	0	0	0	0	0	0	0	0	0	0	0	0	0	0.1	0
Slc25a30	0	0.46	0	0	0	0	0.2	0	0.41	0	0	0	0	0	0	0.12	0
Anxa5	0	0.01	0	0.32	0	0	0.44	0	0	0	0	0	0	0	0	0.37	0
Senp2	0	0.1	0	0	0	0	0	0	0	0	0	0	0	0	0	0.05	0
Gpr143	0.02	0.49	0	0.21	0	0	0.81	0	0.46	0.18	0.15	0	0	0	0	0.43	0
Npffr1	0	0	0	0.98	0.04	0.1	0.87	0	0	0	0.14	0	0	0	0	0	0.24
Nmrk1	0.16	0.19	0.8	0	0	0	0.15	0	0	0	0	0	0	0	0	0.14	0
Slc13a3	0	0.38	0	0.12	0	0.03	0.9	0	0	0	0	0	0	0	0	0.54	0
Atr	0	0.11	0	0	0	0	0	0	0	0	0	0	0	0	0	0.25	0
Adgrb1	0	0	0	0	0	0.16	0	0	0.01	0	0	0	0	0	0	0	0.16
Itih4	0	0.76	0.44	0	0	0	0	0	0	0	0	0	0	0.2	0	0.61	0
Fam204a	0	0.06	0	0	0	0	0	0	0	0	0	0	0	0	0	0.08	0
Plppr2	0.04	0	0	0	0.15	0.11	0	0.44	0	0.03	0	0	0	0	0	0	0.09
Wdr76	0.45	0	0.03	0	0.52	0.56	0	0.66	0	0	0	0	0	0	0.48	0	0
Nsl1	0	0.72	0.22	0.21	0	0	0.52	0	0.09	0	0	0.16	0	0.08	0	0.38	0
Scn1a	0	0	0	0.06	0	0.09	0	0.25	0.08	0	0.12	0	0.14	0.17	0.06	0	0
Klf8	0	0	0.48	0	0.26	0.03	0	0	0	0	0	0	0.36	0	0.1	0	0
Acp7	0	0	0	0	0	0.21	0	0	0	0.33	0.05	0	0	0.35	0.99	0	0.79
Supv3l1	0	0.12	0	0	0	0	0	0	0	0	0	0	0	0	0	0.21	0
Tmem178	0.35	0.09	0.12	0.31	0	0	0	0	0	0	0.31	0.47	0	0	0	0.16	0
Ddx17	0	0.03	0	0	0	0	0.12	0	0	0	0	0	0.17	0.15	0	0.18	0
Samsn1	0	0.59	0.27	0	0	0	0.13	0	0	0	0	0	0	0.15	0	0.26	0
L1cam	0	0	0.29	0.07	0	0	0	0	0	0	0	0	0	0	0	0	0
Dnah12	0.31	0	0	0	0	0.26	0	0.98	0.68	0.95	0	0	0	0	0	0	0
Pepd	0.07	0.15	0	0.18	0	0.07	0.06	0	0	0	0	0	0	0	0	0	0
Tmem126a	0.07	0	0	0	0.14	0.2	0	0.67	0	0	0	0	0	0	0.37	0	0.09
Rragb	0	0	0.18	0.1	0	0	0	0.01	0	0	0	0	0	0	0.03	0	0
Ryr2	0.14	0.2	0.13	0.06	0	0.21	0.23	0	0.19	0.19	0	0	0	0	0	0.22	0
Nup155	0	0.05	0	0	0	0	0.03	0	0	0	0	0	0	0	0	0.1	0
Tagln	0	0.86	0.89	0	0	0	0.3	0	0	0	0	0	0	0	0	0.36	0
Syne1	0.18	0.04	0	0.22	0	0	0.18	0	0.11	0	0.1	0.16	0	0	0	0.16	0
Hpse2	0	0.72	0.04	0	0	0	0.56	0	0.26	0.11	0	0	0	0	0	0.54	0
Rtkn	0	0	0	0	0.18	0.8	0	0	0	0	0	0	0	0	0.9	0	0.44
Zar1	0	0	0	0	0.47	0	0	0.98	0.63	0	0	0	0	0	0	0.12	0.11
Ttyh2	0	0.9	0	0	0	0	0	0	0.48	0.17	0	0	0	0	0	0.25	0
Traf4	0	0.5	0.29	0.28	0	0	0	0	0	0	0	0	0	0	0	0.57	0
Slc39a6	0	0.09	0	0	0	0	0	0	0	0	0	0.08	0	0	0	0.21	0
Tdrd9	0	0.71	0.37	0	0	0	0.04	0	0	0	0	0	0	0	0	0.08	0
S1pr3	0.26	0	0	0	0.18	0	0	0.87	0	0	0	0	0	0	0.47	0	0
Ankrd6	0	0.05	0.15	0	0	0	0	0	0.06	0.14	0	0.05	0	0	0	0	0
Rbm47	0	0.62	0.08	0.05	0	0.1	0.71	0	0	0	0	0	0	0.13	0	0.59	0
Acsl5	0	0	0	0	0.09	0	0	0.72	0	0	0	0	0	0.08	0	0.11	0.61
Gprin1	0	0	0	0	0.01	0.02	0	0.75	0.19	0	0.08	0	0	0	0.06	0	0.2
Fam57a	0.04	0	0	0	0.43	0.15	0	0.42	0.09	0	0	0	0.05	0	0.09	0	0
Rasgrf2	0	0	0	0	0	0.03	0	0.33	0.46	0.33	0	0	0.27	0.59	0.33	0	0
Fndc1	0	0	0	0	0	0.45	0	0.98	0.59	0.26	0	0	0	0	0.53	0	0
Galnt3	0	0	0	0	0	0.09	0.4	0	0.77	0.43	0.15	0	0	0	0	0.1	0
Cryl1	0	0.7	0.36	0.02	0	0	0.44	0	0.04	0	0	0	0	0	0	0.33	0
Cep83	0	0	0	0	0	0	0	0	0	0	0	0	0.51	0.11	0	0	0
Prkd1	0	0	0	0	0	0	0	0.55	0.87	0.97	0	0	0.59	0	0.42	0.44	0
Ddx55	0.07	0	0	0	0.08	0.14	0	0.19	0	0	0	0	0	0	0.16	0	0
Rexo1	0	0	0	0	0.36	0.01	0	0.19	0.05	0	0	0	0	0	0.05	0	0
Scaper	0	0.13	0	0	0	0.1	0.14	0	0.17	0.15	0	0	0.05	0	0	0.11	0
Snx13	0	0.19	0.01	0	0	0	0	0	0	0	0	0	0	0	0	0.21	0
Zfp64	0	0	0	0	0	0	0	0.01	0	0.02	0	0	0	0.08	0.41	0	0
Taf12	0	0.14	0	0.02	0	0	0	0	0	0	0	0	0	0	0	0.23	0
Fbf1	0	0.49	0.06	0	0	0	0.03	0	0	0	0	0	0	0	0	0.08	0
Nckap1	0	0.07	0	0	0	0	0.13	0	0	0	0	0	0.07	0	0	0.07	0
Erich1	0	0.2	0.13	0	0	0	0.07	0	0.03	0	0	0	0	0	0	0.4	0
Tm2d3	0	0	0	0	0.35	0	0	0.14	0	0	0.22	0	0	0	0.47	0	0.25
Tmem147	0.02	0	0	0	0.41	0	0	0.32	0	0	0	0	0	0	0.33	0	0.39
Nfix	0	0	0	0	0	0	0	0	0	0	0.99	0.94	0	0	0	0.04	0
D130043K22Rik	0.04	0	0	0	0	0	0	0	0	0.09	0	0	0.02	0	0	0	0
Nrcam	0	0.12	0	0.17	0	0	0.21	0	0.17	0	0	0	0	0	0	0.22	0
Ahi1	0.17	0	0	0	0.23	0.23	0.2	0.24	0.23	0.2	0.22	0	0.18	0.17	0.24	0	0.23
Akt3	0	0.18	0	0.21	0	0.02	0.22	0	0	0	0	0.19	0.13	0	0	0.19	0
Wdtc1	0	0.2	0	0	0	0	0	0	0	0	0	0	0	0	0	0	0
Osbpl6	0.18	0.1	0	0.22	0.03	0.18	0.22	0	0.1	0.12	0	0	0	0.18	0	0.09	0
Akr1a1	0	0	0	0	0	0	0	0.1	0	0	0	0	0	0	0.11	0	0.28
Lsamp	0.25	0	0.09	0.2	0.24	0.25	0	0.24	0.24	0.21	0.18	0	0	0	0.25	0	0.03
Tram1	0	0	0	0	0	0	0	0.49	0	0	0	0	0	0	0	0.01	0
Car8	0	0.54	0	0	0	0.02	0	0	0.69	0.05	0.01	0	0	0.14	0	0.45	0
Glud1	0	0.05	0	0	0	0	0.05	0	0	0	0	0	0	0	0	0.06	0
Il1rapl2	0.53	0.8	0.69	0	0.89	0	0	0	0	0	0	0	0	0	0	0.05	0
Mycbp	0.15	0	0	0	0.41	0.02	0	0.48	0	0.03	0	0	0	0.07	0.13	0	0
Ctnnbl1	0.04	0.29	0.02	0	0	0	0	0	0	0	0	0	0	0	0	0.22	0
Col5a3	0.02	0.62	0.55	0	0	0	0.65	0	0.15	0	0	0	0	0	0	0.33	0.02
Hccs	0	0	0	0.74	0	0.59	0	0	0.67	0.53	0	0	0	0	0.53	0	0
Mid1	0	0	0	0	0	0	0	0	0.29	0.05	0.73	0.03	0	0	0.34	0	0
St7	0.01	0.29	0.18	0	0	0	0.1	0	0	0	0	0	0	0	0	0.21	0
Hhipl1	0.06	0	0	0	0	0	0	0.21	0	0	0.04	0	0	0	0.72	0	0.02
Frmpd2	0	0	0	0.17	0	0	0.35	0	0.86	0.68	0	0	0	0	0	0.38	0
Dnmt3a	0.08	0	0	0.08	0	0.18	0	0.16	0	0.16	0	0	0.06	0.17	0.04	0	0
Kxd1	0.23	0	0	0	0.24	0	0	0.28	0	0	0	0	0	0	0.12	0	0.01
Wars2	0	0.19	0	0	0	0	0.28	0	0	0	0	0	0.01	0	0	0.07	0
Yipf5	0	0	0	0	0.15	0	0	0.52	0	0	0	0	0	0	0.12	0	0.01
Samd10	0.03	0	0	0	0	0	0	0.01	0.04	0	0	0	0	0	0.08	0.03	0.58
Cpt1a	0	0.83	0.37	0	0	0.31	0.33	0	0.23	0.16	0	0	0	0	0	0.42	0
Plekhb1	0	0	0	0.31	0	0	0.27	0	0.49	0	0.05	0	0	0	0	0.07	0
Tshr	0	0	0	0	0	0	0	0.3	0	0	0	0.9	0.41	0	0	0	0.88
Bin1	0	0	0	0	0.16	0	0	0.25	0	0	0	0	0	0	0.1	0	0
Ccdc34	0.42	0	0	0	0.56	0	0	0.27	0	0	0	0	0	0	0	0	0.2
Aanat	0	0	0	0	0.17	0.49	0	0.81	0.03	0	0	0	0	0	0.58	0	0.75
Rin3	0.11	0.45	0	0	0	0	0.22	0	0.03	0	0.74	0	0	0	0	0.02	0
Heg1	0.58	0.22	0.3	0.44	0	0	0.13	0	0	0	0	0	0	0.27	0	0.1	0
Dad1	0	0	0	0	0.22	0	0	0.54	0	0	0.1	0	0	0	0.04	0	0.19
Zfp260	0.08	0	0	0.03	0.19	0.01	0	0.51	0	0	0	0	0	0	0.64	0	0
Nexn	0	0	0	0	0	0	0	0	0	0	0	0	0.93	0.55	0	0	0.44
Nr6a1	0	0.13	0	0	0	0.16	0	0	0.4	0.36	0	0	0.01	0.15	0	0.16	0
Usp20	0	0.1	0	0.02	0	0	0	0	0	0.07	0	0	0	0	0	0	0
Trim9	0	0.38	0	0	0	0	0.28	0	0	0	0	0	0	0	0	0.24	0
Frmd4a	0.08	0.22	0	0.2	0	0.2	0.24	0	0.22	0.2	0.21	0.16	0.17	0.07	0	0.22	0
Thoc7	0.18	0	0	0	0.14	0	0	0.26	0	0	0	0	0	0	0.29	0	0.13
Tcaf1	0.18	0	0	0	0	0	0	0.03	0	0	0	0	0	0.11	0	0.08	0
Uvrag	0.01	0.23	0.01	0.06	0	0	0.09	0	0	0	0	0	0	0	0	0.19	0
Tpm3	0	0	0	0	0.17	0	0	0.02	0	0	0	0	0.12	0	0	0	0
Rgsl1	0.35	0	0	0	0	0.84	0	0.85	0	0	0	0	0	0	0	0	0.42
Myc	0.02	0.36	0.36	0	0	0.48	0	0.7	0	0	0	0	0	0	0.12	0.24	0
Piga	0	0.48	0	0	0	0	0.2	0	0	0	0	0	0	0	0	0.35	0
Kcnmb4	0.29	0	0.28	0	0	0.09	0	0	0.23	0	0	0	0	0	0	0.03	0
Zcchc7	0.17	0	0.03	0	0.08	0.1	0	0.16	0.08	0	0	0	0.05	0.01	0	0	0.1
Kbtbd12	0	0	0	0	0	0	0	0	0.6	0.81	0.11	0.44	0	0	0	0	0
Pik3ca	0	0.14	0	0	0	0	0	0	0	0	0	0	0	0	0	0.21	0
Cnih2	0	0	0	0	0.05	0.07	0	0.73	0	0	0	0	0	0	0.27	0	0.58
Arhgef15	0	0	0	0.31	0.87	0	0	0.04	0	0	0	0	0.06	0	0.69	0	0.55
Hdhd3	0	0.43	0.03	0	0	0	0.36	0	0	0	0	0	0	0	0	0.31	0
Topbp1	0	0.42	0.1	0	0	0	0.04	0	0	0	0	0	0	0	0	0.12	0
Gpr22	0.06	0	0	0	0.02	0	0	0.58	0	0.02	0	0	0.29	0	0.45	0	0
Sufu	0	0.18	0	0	0	0	0.19	0	0	0	0	0	0	0	0	0.27	0
Sv2c	0	0.3	0.64	0	0	0	0	0	0.31	0	0	0	0	0.35	0	0.46	0
Chodl	0	0	0	0	0.43	0	0.58	0	0	0	0.09	0	0.27	0.46	0.17	0.32	0
Msi1	0	0	0	0.32	0.45	0	0	0.24	0	0	0.07	0	0	0	0	0	0.02
Ntsr1	0	0	0	0	0	0	0	0	0	0	0.8	0.43	0	0	0.93	0.35	0.26
Hs3st4	0.29	0.24	0.16	0.14	0	0.42	0.38	0.18	0.47	0.16	0	0	0	0	0	0.16	0
Cux1	0	0.2	0	0	0	0	0.24	0	0.11	0	0	0	0	0.05	0	0.22	0
Abr	0.03	0	0	0.14	0.07	0.2	0	0.04	0.06	0.17	0	0	0.12	0.1	0.04	0	0
Ddx23	0	0	0	0	0.1	0	0	0.32	0	0	0	0	0	0	0	0	0
Fam117b	0	0.24	0.15	0	0	0	0.01	0	0	0	0	0	0	0	0	0.14	0
Tekt1	0	0.77	0.35	0	0	0	0.63	0	0	0	0	0	0	0	0	0.27	0
Polr2c	0	0	0	0	0.02	0	0	0.62	0	0	0	0	0	0	0	0	0.1
Tmem266	0	0.34	0	0	0	0	0.31	0	0.34	0	0	0	0	0	0	0.01	0
1700088E04Rik	0.06	0	0	0	0.41	0.06	0	0.61	0	0	0	0	0	0	0.18	0	0.36
Tnks	0	0.51	0.17	0.1	0	0	0.15	0	0	0	0	0	0	0	0	0.27	0
Ropn1l	0.3	0.32	0.33	0	0	0	0	0	0.18	0.14	0	0.05	0	0	0	0	0
Spink13	0	0	0	0	0	0.54	0	0	0	0.31	0	0	0.62	0.44	0.53	0	0.13
Pum2	0	0.21	0	0	0	0	0.16	0	0	0	0	0	0	0	0	0.21	0
Syn3	0	0.24	0	0	0	0.29	0.23	0	0	0	0	0	0	0	0	0.33	0
Psmd11	0.16	0	0	0.01	0.14	0	0	0.43	0	0	0	0	0	0	0.18	0	0.12
Rapgef3	0.22	0.19	0.03	0	0.19	0	0	0	0.02	0	0	0	0	0	0	0	0
Rprml	0.72	0	0	0	0	0.92	0	0.2	0	0.09	0	0	0.25	0	0	0	0
Grhpr	0	0.15	0	0	0	0	0.05	0	0	0	0	0.24	0	0.13	0	0.22	0
Nol11	0	0	0	0	0	0.22	0	0.19	0	0	0	0	0	0	0.37	0	0
Egflam	0	0	0	0.96	0.79	0	0.93	0	0	0	0	0	0	0	0	0	0
Apool	0	0.73	0.2	0.09	0	0	0.69	0	0.02	0	0	0	0	0	0	0.57	0
Ptprb	0	0.71	0	0	0	0	0.35	0	0	0.04	0	0	0.23	0	0	0.29	0
Cadm1	0.24	0.14	0.24	0.16	0.11	0	0.22	0.22	0.22	0	0.04	0.05	0	0	0	0.16	0.23
Nr4a3	0	0.44	0.23	0	0	0	0.03	0	0	0	0.48	0	0	0	0	1	0
Lrrc3b	0	0.02	0	0	0	0	0	0	0.06	0.21	0	0	0	0.1	0.06	0	0
Man1a2	0	0.1	0.39	0	0	0	0	0	0	0	0	0	0	0.13	0	0	0
Rasgef1a	0.13	0	0	0	0.15	0.14	0	0.11	0	0	0	0	0.11	0.07	0	0	0
Bmpr1b	0	0.04	0	0	0	0.26	0.71	0	0.55	0.97	0	0	0	0	0	0.14	0
Adarb1	0	0	0	0	0.05	0.18	0	0.04	0	0	0	0	0	0	0	0	0.18
Orc4	0	0.21	0	0.09	0	0	0.16	0	0	0	0	0	0	0	0	0.21	0
Trim23	0	0.04	0	0	0	0	0	0	0	0	0	0	0.02	0	0	0.11	0
Fgf5	0	0.48	0	0	0	0	0	0	0	0.02	0.9	0	0	0	0	0	0
Rgs16	0.72	0	0	0	0.4	0	0	0.77	0	0.31	0	0	0	0.71	0	0.12	0
Slc12a2	0	0	0	0.04	0	0.02	0	0	0	0	0	0	0	0	0	0.19	0
Smco4	0	0.44	0.02	0	0	0	0.1	0	0.56	0.07	0	0	0	0	0	0.08	0
Gria1	0.23	0.2	0.23	0.16	0	0.24	0.24	0.16	0.19	0	0	0	0.13	0.21	0	0.02	0
Sec31a	0	0.44	0	0	0	0	0.21	0	0	0	0	0	0	0	0	0.32	0
Lpcat2	0	0	0	0	0.16	0	0	0.24	0	0.06	0	0	0.14	0.34	0	0.13	0
Pdia5	0	0.05	0.42	0	0	0.36	0	0	0	0	0	0	0.42	0.27	0.11	0	0
Il15ra	0	0	0	0	0	0	0	0	0.28	0.42	0.37	0	0	0	0.49	0	0.03
Usp6nl	0	0.54	0.44	0	0	0	0	0	0	0	0	0	0	0	0	0.12	0
Psmg3	0	0.86	0.17	0.45	0	0	0.33	0	0.11	0	0	0	0.16	0	0	0.22	0
Tmem63c	0	0.3	0	0	0	0.07	0	0	0	0	0	0	0	0	0	0.06	0
Cox7a2	0	0	0	0	0.32	0	0	0.55	0	0	0	0	0	0	0.29	0	0.37
Emc8	0	0.89	0.02	0.07	0	0.06	0.33	0	0	0	0	0	0.11	0	0	0.76	0
Henmt1	0	0.3	0.12	0	0	0	0.58	0	0.08	0.04	0	0.47	0	0	0	0.3	0
Tmem191c	0	0	0	0	0.35	0.07	0	0.68	0.06	0.17	0	0	0.06	0.14	0.38	0	0.21
Grik5	0	0	0	0	0	0.06	0	0	0	0	0	0	0	0	0	0	0
Efemp2	0.02	0	0.11	0.59	0.28	0	0.2	0	0	0	0	0	0.07	0	0.23	0.32	0
Nsfl1c	0	0.13	0	0	0	0	0	0	0	0	0	0	0	0	0	0.13	0
Rspry1	0	0	0.15	0.08	0.02	0.01	0	0.02	0	0	0	0	0	0	0.03	0	0
Arhgap40	0	0.9	0	0	0	0.45	0.2	0	0.68	0	0	0	0	0	0	0.45	0
Brs3	0.25	0	0.42	0	0.98	0	0.21	0	0	0	0	0	0	0	0	0.25	0.31
Flna	0	0.23	0.36	0	0	0	0	0	0.02	0	0	0	0	0	0.02	0	0
Rangap1	0.04	0	0	0	0	0.18	0	0.36	0	0	0	0	0	0	0.09	0	0.03
Fam13c	0	0	0	0	0	0	0	0	0	0	0	0	0.09	0.14	0	0.02	0
Rab38	0	0	0	0	0	0.93	0	0.4	0	0.8	0	0	0	0.18	0.29	0	0.14
Mlh3	0	0.38	0.36	0	0	0	0.09	0	0	0	0	0	0.14	0	0	0.35	0
Fxr1	0	0.14	0	0	0	0	0	0	0	0	0	0	0	0	0	0.07	0
Hnrnph2	0	0	0	0	0	0	0	0.14	0	0	0.06	0	0	0	0.06	0	0.3
Samhd1	0	0.02	0	0	0	0	0	0.1	0.25	0.07	0	0	0	0	0	0.01	0
Mapk8ip1	0	0	0	0.05	0.16	0.02	0	0.08	0	0.08	0	0	0	0	0.16	0	0.16
Pdlim7	0.22	0	0	0	0.52	0.32	0	0.8	0.11	0.1	0	0	0	0	0.43	0	0.05
Nbea	0.15	0.23	0	0.22	0	0	0.24	0	0.15	0.01	0.13	0	0.09	0	0	0.24	0
Epo	0.03	0	0	0	0.37	0.25	0	0.79	0	0	0	0	0	0	0.53	0	0.39
Rab9b	0	0.02	0	0	0	0	0.19	0	0	0	0.06	0.15	0.5	0.36	0	0.36	0
Znrf3	0	0	0	0	0	0	0	0.15	0	0.03	0	0	0	0	0	0	0
Tagln3	0	0	0	0	0	0	0	0.14	0	0	0	0	0	0	0	0	0.15
Zfr2	0	0.22	0	0	0	0	0.08	0	0	0	0	0	0	0	0	0.09	0
Gne	0	0.44	0.1	0	0	0	0.13	0	0	0	0	0	0	0	0	0.18	0
Ppp1r1a	0.14	0	0	0	0.03	0.02	0	0.9	0	0	0	0	0	0.58	0.64	0	0
Antxr2	0	0.68	0.92	0	0	0	0	0	0	0	0	0	0.61	0	0	0.29	0
Myo1b	0	0	0	0	0	0.96	0.51	0.03	0.27	0.63	0	0	0	0.16	0	0.05	0.01
Ndst4	0.98	0.1	0	0.2	0	0	0	0.21	0	0	0	0	0	0	0	0.34	0
Nop58	0	0.23	0	0	0	0	0.05	0	0	0	0	0	0	0	0	0.18	0
Rhbdd3	0	0.2	0.16	0	0	0	0	0	0	0	0	0	0	0	0	0.08	0
Pam	0	0	0	0.18	0	0	0.08	0.32	0.35	0	0.22	0	0	0	0.05	0	0.32
Gucy2f	0.23	0.35	0.29	0	0.93	0.22	0	0	0	0	0	0	0	0	0.26	0.16	0.43
Gprin3	0	0.48	0.55	0	0	0	0	0	0	0	0	0.09	0.07	0	0	0	0
Ano6	0	0.02	0.53	0	0	0	0	0.08	0	0	0	0	0.14	0	0.15	0	0
Zmat3	0	0	0	0	0.05	0	0	0.21	0	0	0	0	0	0	0	0.06	0.21
Kynu	0.52	0.8	0.08	0	0	0.02	0.03	0	0.52	0.12	0	0	0	0	0	0.01	0
Rab40c	0	0	0	0	0.33	0.19	0	0.52	0	0	0	0	0	0	0.33	0	0.27
Samd9l	0.12	0.48	0.98	0	0	0	0	0.18	0	0	0	0	0	0	0	0	0
Hdac5	0	0.12	0	0	0	0	0.03	0	0	0	0.09	0	0	0	0	0.33	0
Eif2ak2	0	0.88	0.05	0	0	0	0.72	0	0	0	0	0.1	0	0	0	0.6	0
Nt5c3	0	0.04	0	0	0	0	0.27	0	0	0	0	0	0	0	0	0.1	0
Eif4ebp1	0.01	0.75	0.79	0.32	0	0	0.42	0	0	0	0	0.14	0.2	0	0	0.31	0
Gab3	0	0	0	0	0.02	0.17	0	0.89	0	0	0	0	0	0.33	0.48	0	0
Fam131a	0	0	0	0	0.1	0	0	0.63	0	0	0	0	0	0	0.08	0	0
Tmem26	0	0	0	0	0	0	0.35	0	0	0	0.17	0.92	0.51	0	0	0.93	0
Usp9x	0.08	0	0	0.08	0.07	0	0	0.11	0	0	0	0	0	0.12	0.06	0	0
Pate2	0	0	0	0	0.07	0.31	0	0.59	0	0.18	0	0	0	0	0.56	0	0.41
Slc9a7	0.15	0	0	0	0.11	0	0	0.17	0	0	0	0	0	0	0	0	0
Agbl2	0	0.36	0.36	0	0	0	0.27	0	0	0	0	0.13	0	0	0	0.37	0
Josd2	0.09	0	0	0	0.21	0	0	0.77	0	0	0	0	0	0	0.63	0	0
Rgs20	0	0	0	0	0	0	0	0	0.05	0	0.27	0.02	0	0	0.7	0.09	0
Mpped2	0	0	0	0.27	0	0	0	0	0	0	0	0.38	0.96	0.9	0	0.24	0
Igdcc4	0	0	0	0	0	0	0	0.3	0	0	0	0	0	0	0.54	0	0
Rab3gap1	0	0.02	0	0	0	0	0	0	0	0	0	0	0.13	0	0.01	0.02	0.07
Emcn	0.56	0.41	0	0.05	0	0	0.76	0	0	0	0	0	0	0	0.04	0	0
Stx16	0	0	0	0.15	0.25	0	0	0.23	0	0	0	0	0	0	0.24	0	0
Mknk1	0.28	0.01	0	0.39	0	0.06	0	0	0	0	0	0	0	0	0	0.1	0
Suv39h1	0.27	0	0	0	0.33	0	0	0.58	0	0	0	0	0	0	0.28	0.11	0.38
Asap3	0	0	0	0	0.77	0	0	0	0.57	0.83	0.07	0	0	0	0.3	0.2	0
Tinagl1	0	0.61	0.79	0.44	0	0	0	0	0	0	0	0	0.12	0	0	0	0
Dlg5	0	0	0	0	0	0	0	0	0.01	0	0.23	0	0	0	0	0.02	0
Tfcp2	0	0.29	0.02	0	0	0	0.01	0	0	0	0	0	0	0	0	0.34	0
Cntn1	0	0.04	0	0.17	0	0.2	0.14	0.18	0.09	0.06	0	0	0	0	0.22	0.07	0.04
Pfdn5	0	0	0	0	0.43	0.03	0	0.08	0	0	0	0	0	0	0	0	0.46
Dbndd1	0.01	0	0	0.34	0.6	0	0	0.3	0	0	0	0	0	0	0.06	0	0.46
Dyrk1a	0	0.08	0	0	0	0	0	0	0	0	0	0	0	0	0	0.03	0
Brdt	0.03	0	0	0	0.12	0.32	0	0.85	0.07	0	0	0	0	0.02	0.33	0	0
Pnldc1	0.3	0	0.07	0	0.29	0.07	0	0.07	0.19	0	0	0	0	0	0.78	0	0
Ubn2	0.18	0	0	0.16	0.21	0.02	0	0.27	0.07	0	0.05	0	0	0.05	0.13	0	0.2
Prdm12	0	0	0	0	0.27	0	0	0	0	0	0	0.67	0.97	0.82	0	0	0
Slc51a	0	0.68	0.37	0.27	0	0	0.44	0	0	0	0	0	0	0	0	0.53	0
Kif24	0	0	0	0	0.11	0	0	0.9	0	0.13	0	0	0	0	0	0	0.09
Kctd1	0	0	0	0	0	0	0	0.8	0.18	0	0	0	0	0.38	0	0	0
Arhgap25	0	0	0	0	0	0	0.69	0	0.73	0.14	0	0	0	0	0	0.35	0.33
Baz2b	0	0	0	0	0	0	0.2	0	0.04	0	0	0.07	0.11	0	0	0.18	0
Fgf1	0.04	0	0	0.43	0	0	0.3	0	0.24	0.06	0.16	0	0	0	0.01	0.66	0
Spry1	0	0.06	0.79	0	0	0	0	0	0	0	0.77	0	0	0.03	0	0.17	0
Scn8a	0	0.14	0	0	0	0.16	0.19	0	0.07	0	0	0	0	0	0	0.16	0
Zfp280c	0.12	0	0	0	0.04	0	0	0.35	0	0	0	0	0	0	0.16	0	0
Ankrd13a	0	0	0	0	0.2	0	0	0.4	0	0	0	0	0	0	0.25	0	0
Ccp110	0	0.37	0	0.13	0	0	0.26	0	0	0	0	0	0.03	0	0	0.16	0
Pex13	0	0	0	0	0.05	0	0	0.4	0	0	0	0	0	0	0.03	0	0.06
Shank2	0	0.35	0.16	0	0	0	0.16	0	0	0.04	0	0	0	0	0	0.23	0
Ippk	0	0.15	0	0	0	0	0.14	0	0	0	0	0	0	0	0	0.29	0
Wipf1	0	0.05	0	0	0	0.81	0	0.21	0.3	0.11	0	0	0.63	0	0	0.1	0
Ldhd	0	0.03	0.08	0.69	0.05	0	0	0.02	0	0	0	0	0	0	0.51	0	0
Trim46	0	0	0	0	0.12	0	0	0.37	0	0	0	0	0	0.08	0.01	0	0
Gpld1	0	0	0.43	0.01	0.51	0	0	0	0	0	0	0	0	0	0	0.08	0
Ift74	0	0.2	0	0	0	0	0	0	0	0	0	0	0.13	0	0	0	0
2310061I04Rik	0	0.2	0	0	0	0	0	0	0	0	0	0	0	0	0	0.01	0
1700025G04Rik	0	0.48	0.13	0.1	0	0	0.22	0	0	0	0	0.1	0.15	0.11	0	0	0
Adamtsl1	0	0.51	0.73	0	0	0	0	0	0	0	0.85	0	0.8	0	0	0	0
Map3k5	0	0	0	0	0	0.23	0	0	0.6	0.47	0	0	0.23	0.13	0	0.2	0
Fanca	0.08	0.85	0.02	0.16	0	0	0.34	0	0	0	0	0	0	0	0	0.5	0
Mapk8	0	0.25	0.1	0	0	0	0.01	0	0	0	0	0	0	0	0	0.18	0
Hars2	0	0.36	0	0	0	0	0.18	0	0	0	0	0	0	0	0	0.02	0
Bcap31	0	0	0	0.02	0.38	0	0	0.17	0	0	0	0	0	0	0.47	0	0.39
Tapt1	0.03	0	0	0	0.06	0.05	0	0	0	0	0	0	0.26	0	0	0	0
Chsy3	0	0.11	0.46	0	0	0.42	0.4	0	0	0.2	0	0	0	0	0	0.38	0
Ammecr1l	0	0	0	0	0.09	0	0	0.61	0	0	0	0	0	0	0.03	0	0
Zc3h12c	0	0.02	0	0	0	0	0.2	0	0	0	0	0	0	0	0	0.42	0
Grin2b	0.23	0	0	0.1	0.21	0.23	0.12	0.24	0.22	0.11	0	0	0.2	0.2	0.1	0	0.14
Kansl3	0	0.35	0	0	0	0	0.13	0	0	0	0	0	0	0	0	0.16	0
Mocs2	0	0.05	0	0	0	0	0.01	0	0.01	0	0	0	0	0	0	0.35	0
Nfe2l2	0	0	0	0.08	0	0	0.18	0	0	0	0.44	0.25	0	0	0	0.86	0
Pcmt1	0.04	0	0	0	0.12	0	0	0.16	0	0.15	0	0	0	0	0.08	0	0
Chga	0	0	0	0	0.05	0	0	0.61	0.17	0	0	0	0	0.13	0.14	0	0.51
Fbxo15	0	0.93	0.47	0	0	0	0.5	0	0	0	0	0.05	0	0	0	0.37	0
Cda	0.36	0	0	0.28	0.36	0.38	0	0.37	0	0	0	0	0	0	0.51	0	0
Tub	0	0.23	0	0	0	0	0.08	0	0	0	0	0	0	0	0	0	0
Apobec4	0.28	0	0	0	0	0.55	0	0.92	0.06	0.39	0	0	0.08	0.5	0	0	0.13
Glb1l	0	0	0	0	0.19	0	0	0.8	0	0.08	0	0	0	0	0	0.07	0
Pde1b	0.18	0.58	0.27	0.36	0	0	0.58	0	0	0	0	0	0	0	0	0.04	0
Zfr	0.06	0	0	0.02	0.04	0.11	0	0.2	0.09	0.01	0	0.04	0	0.03	0.12	0	0.16
Rubcnl	0.08	0.42	0	0	0	0.35	0.28	0	0.3	0.26	0	0	0	0	0	0.43	0
Trib3	0	0.24	0	0	0	0	0.4	0	0.08	0	0	0.4	0.42	0.14	0	0.38	0
Ube2d3	0	0.15	0	0	0	0	0.11	0	0	0	0	0	0	0	0	0.15	0
Hnrnph3	0	0	0	0.09	0.17	0	0.07	0	0	0	0.04	0.04	0	0	0	0	0
Polr2e	0.25	0.03	0	0	0	0	0.23	0	0	0	0	0	0	0	0	0.13	0
St8sia4	0	0.79	0	0	0	0.1	0	0	0.57	0	0	0	0	0	0	0.65	0
Ptch1	0	0	0	0	0	0	0	0	0.09	0	0.02	0	0.55	0	0.01	0.01	0
Mysm1	0.14	0	0	0	0	0	0	0.19	0	0	0	0	0	0	0	0	0
Cd96	0	0.99	0.7	0	0	0.54	0	0	0	0	0	0	0	0	0	0.35	0
Ccdc138	0	0.06	0	0	0	0	0	0	0	0	0	0.02	0	0	0	0.35	0
Tspan13	0.1	0	0	0	0.18	0	0	0.24	0	0	0	0	0	0	0.18	0	0.13
Csmd3	0.21	0.25	0	0	0	0.24	0.1	0.23	0.24	0	0.17	0	0.22	0	0.17	0.23	0
Shisa4	0.14	0	0	0	0.08	0.19	0	0.29	0.15	0	0	0	0	0	0.47	0	0.37
Msantd1	0	0.7	0	0.06	0	0	0.78	0	0	0	0	0	0	0	0	0.48	0
Twf2	0.02	0	0	0	0	0.05	0	0.11	0	0	0	0	0	0.05	0	0	0.21
Fyco1	0.05	0	0	0	0	0.53	0	0.73	0.13	0	0	0	0	0	0.47	0	0.47
Ppp1r14c	0	0.52	0.38	0.23	0	0	0	0	0	0	0	0	0.19	0	0	0	0
Cep170	0	0.39	0.13	0	0	0	0.25	0	0	0	0	0	0	0	0	0.27	0
Adamts13	0.19	0.96	0.33	0	0	0	0.29	0	0	0	0	0	0	0	0	0.46	0
Abca8b	0	0	0	0	0.76	0	0	0.39	0	0	0.03	0.2	0.74	0	0	0	0.18
P3h2	0	0.21	0	0	0	0	0.47	0	0.7	0.35	0.16	0.11	0	0	0	0.54	0
Crym	0	0	0	0	0	0.3	0	0	0.64	0.58	0	0	0.87	0.79	0	0	0
Proser1	0	0	0	0	0	0	0	0.42	0	0	0	0	0	0	0.42	0	0
[truncated: 5,644 more rows]
