# Supplementary figures and images for: Cross-species analysis defines the conservation of anatomically segregated VMH neuron populations
Source: eLife journal article supplement (doi:10.7554/elife.69065), 2021-05-21

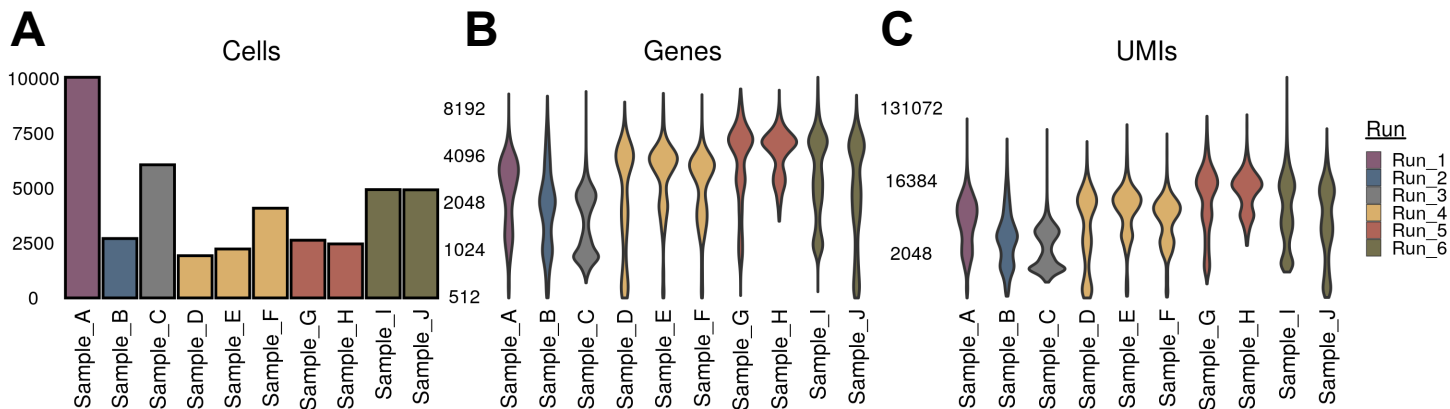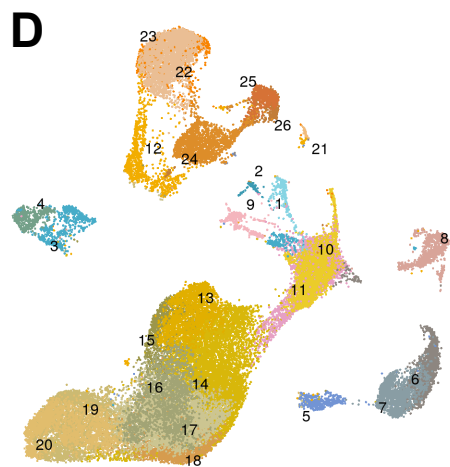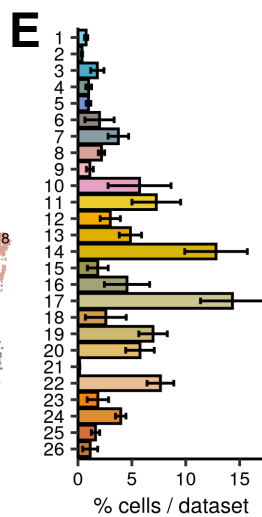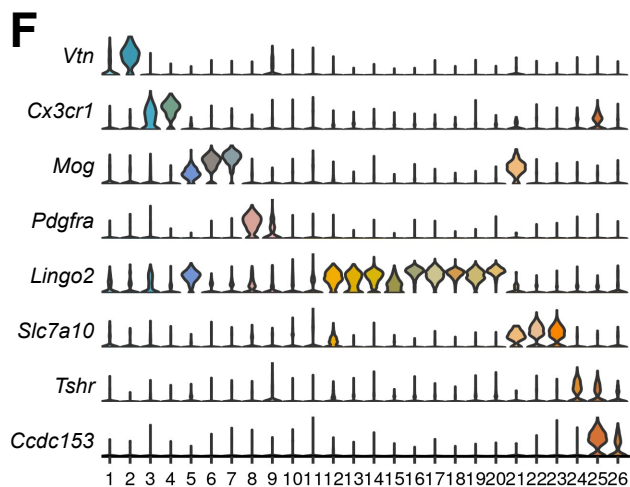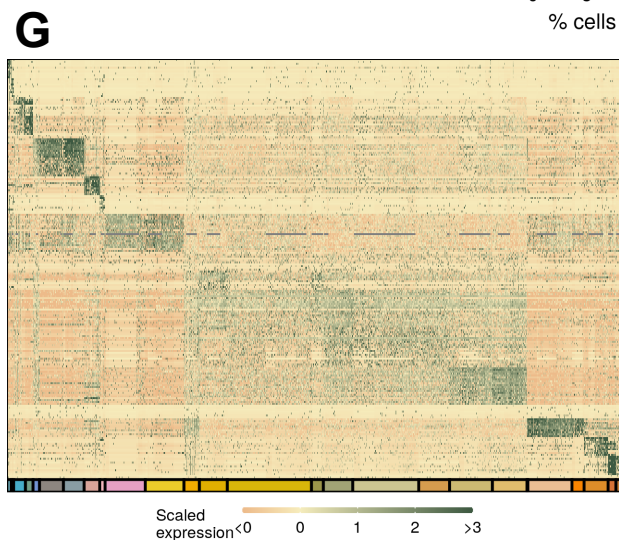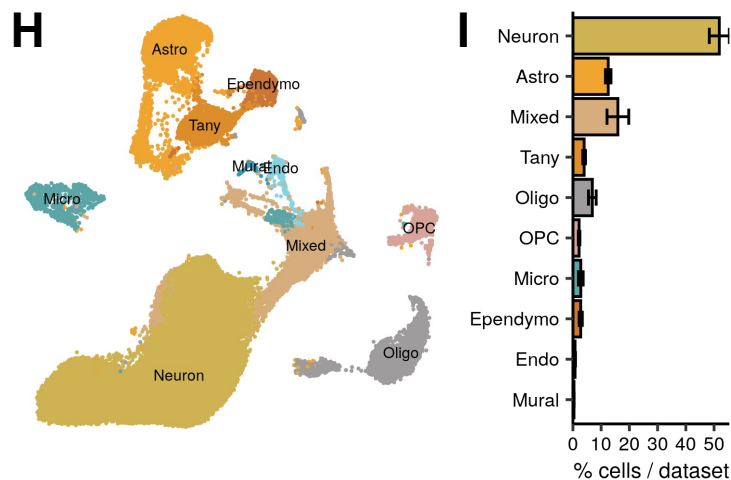

Supplement: supp [file elife-69065-supp-v1.zip › elife_poa_e69065_Figure_1_figure_supplement_1.pdf]

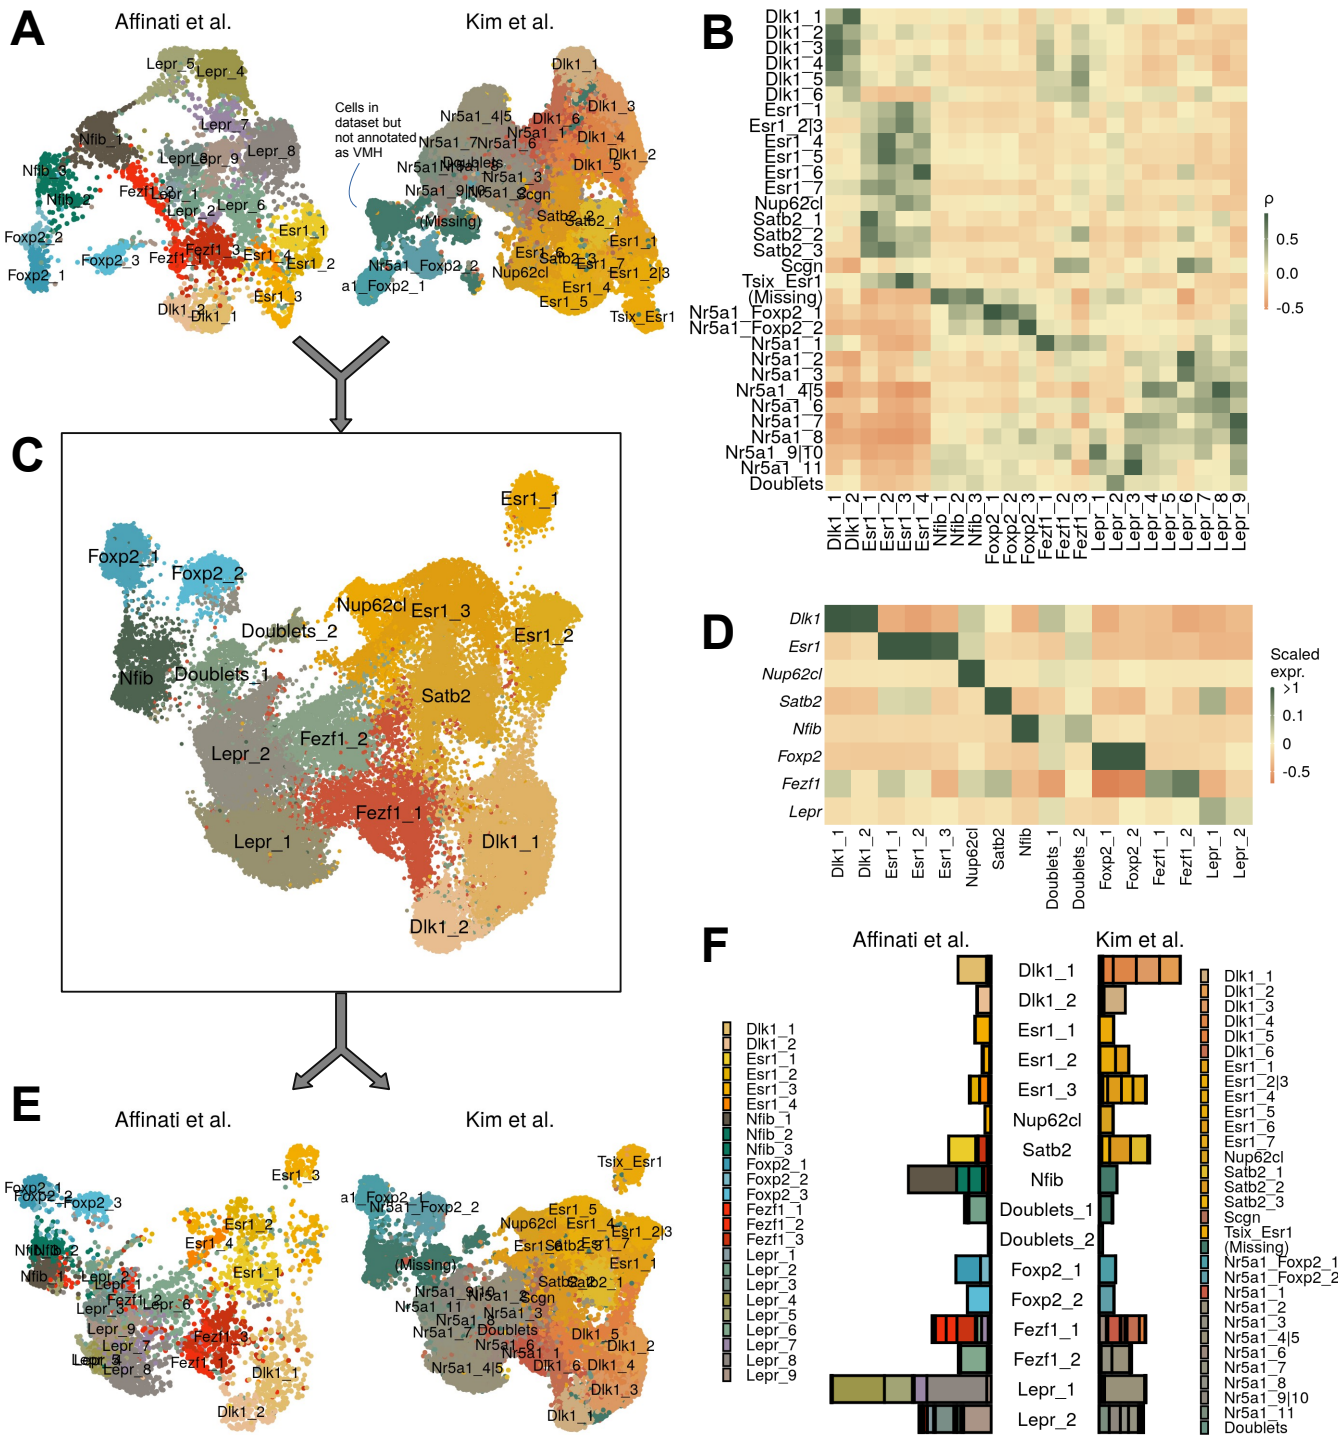

Supplement: supp [file elife-69065-supp-v1.zip › elife_poa_e69065_Figure_2_figure_supplement_1.pdf]

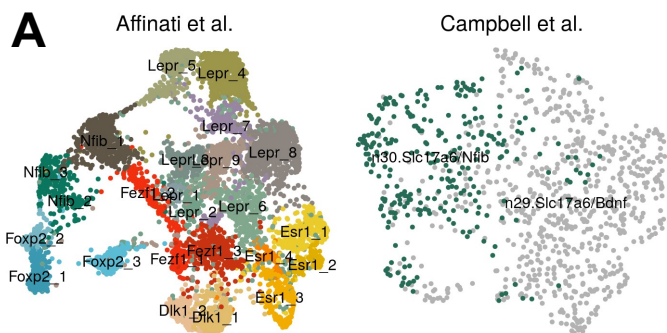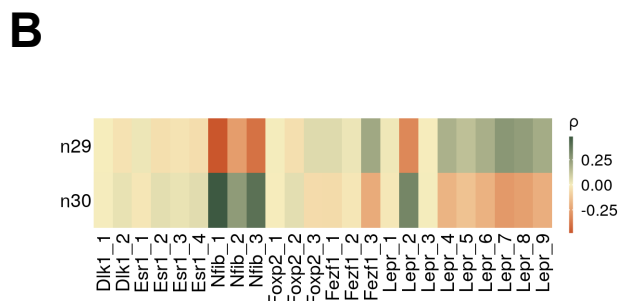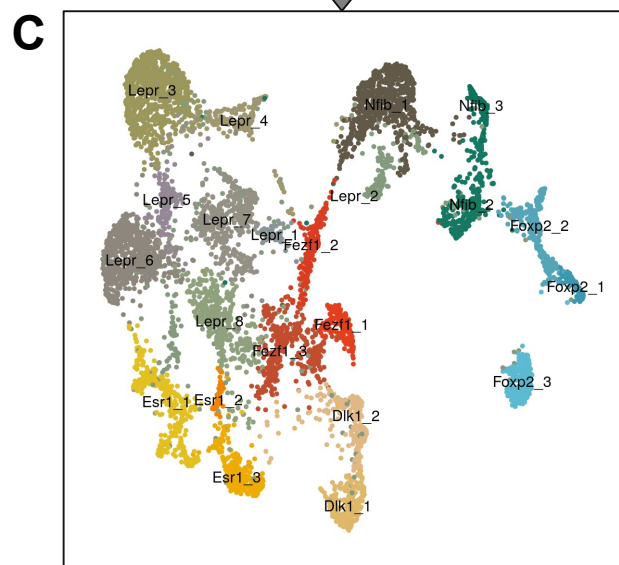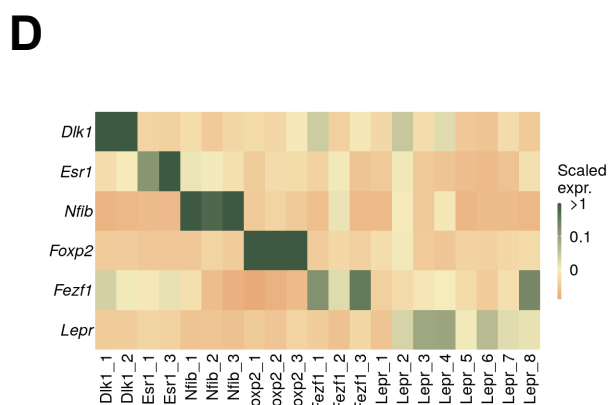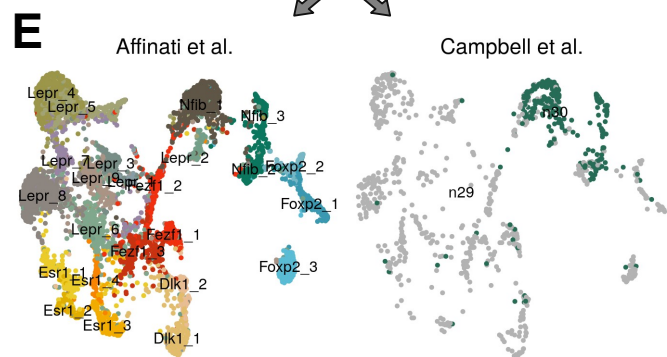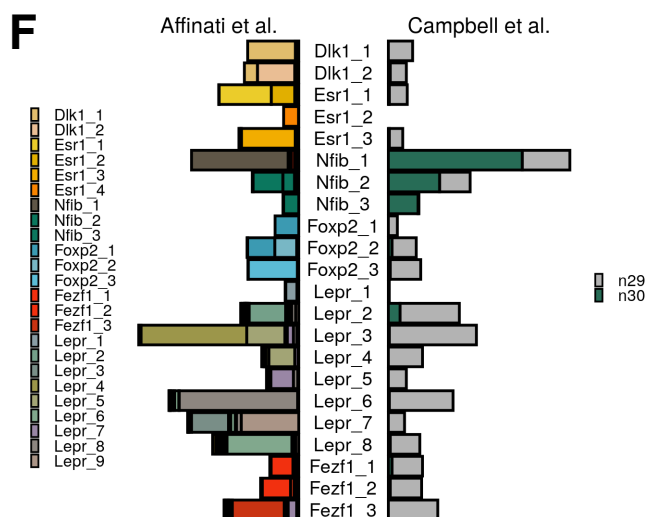

Supplement: supp [file elife-69065-supp-v1.zip › elife_poa_e69065_Figure_2_figure_supplement_2.pdf]

**A**

All neurons

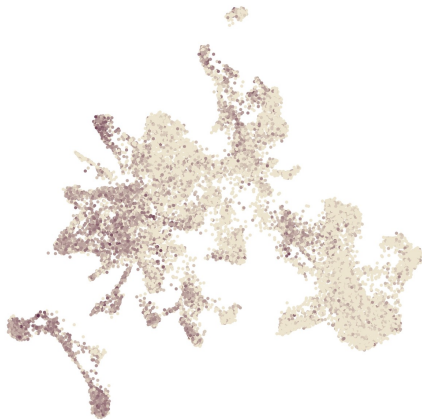*Dlk1*

5

4

3

2

1

0

**B**

VMH neurons

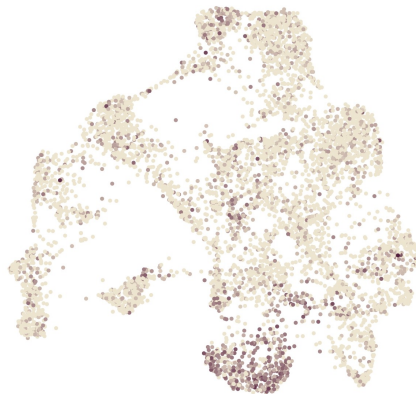*Dlk1*

3

2

1

0

Supplement: supp [file elife-69065-supp-v1.zip › elife_poa_e69065_Figure_2_figure_supplement_4.pdf]

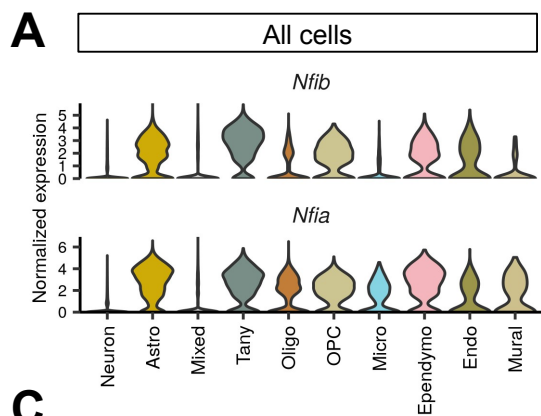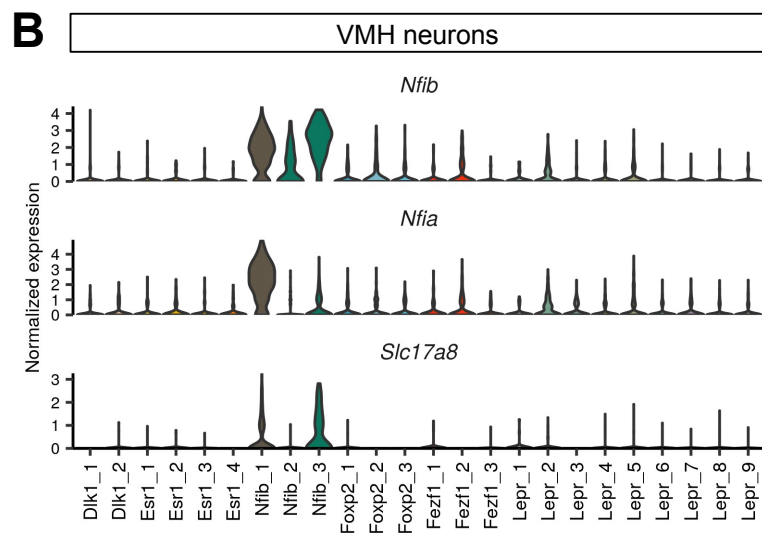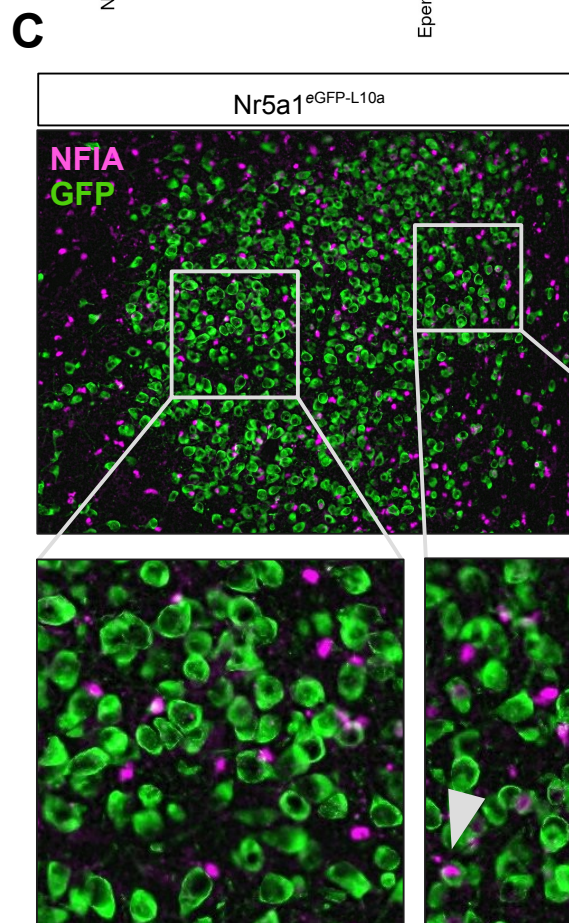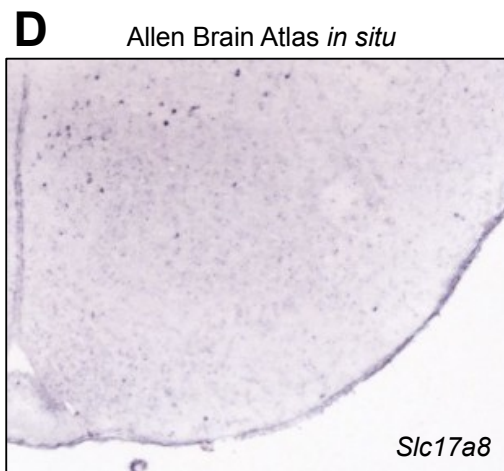

Supplement: supp [file elife-69065-supp-v1.zip › elife_poa_e69065_Figure_2_figure_supplement_5.pdf]

Allen Brain Atlas *in situ*

Nr5a1<sup>tdTomato</sup>

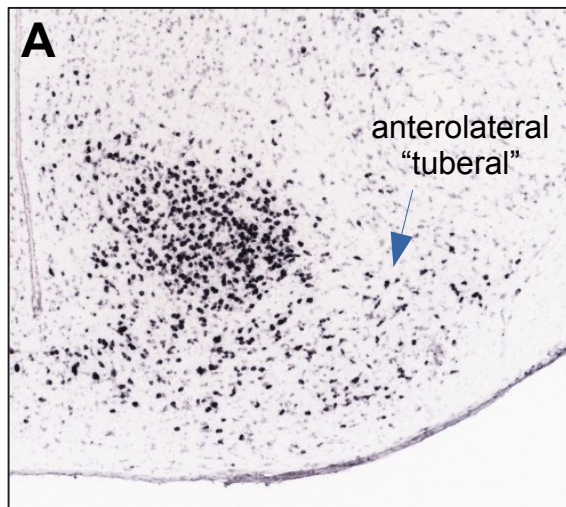

**B**

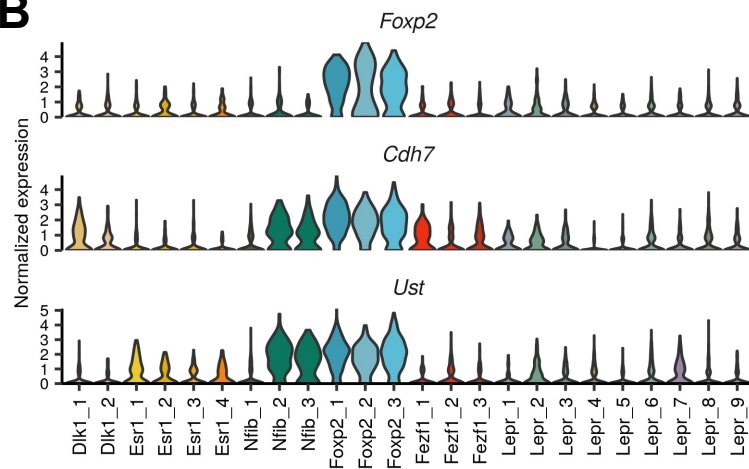

Allen Brain Atlas *in situ*

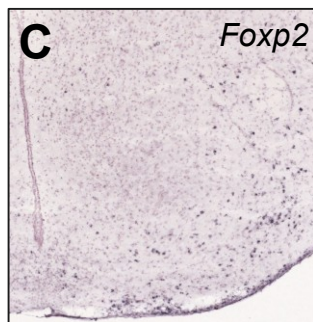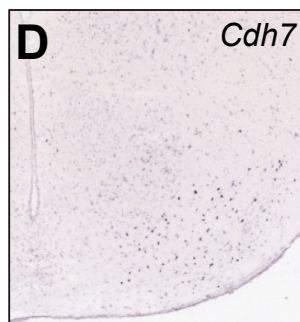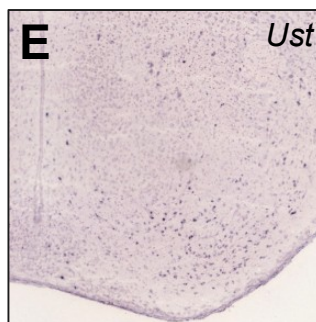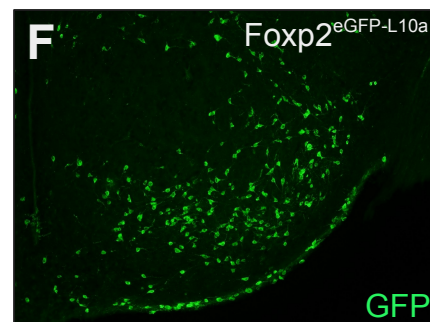

Supplement: supp [file elife-69065-supp-v1.zip › elife_poa_e69065_Figure_2_figure_supplement_6.pdf]

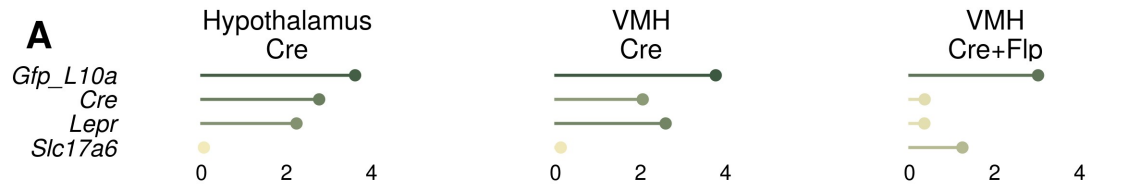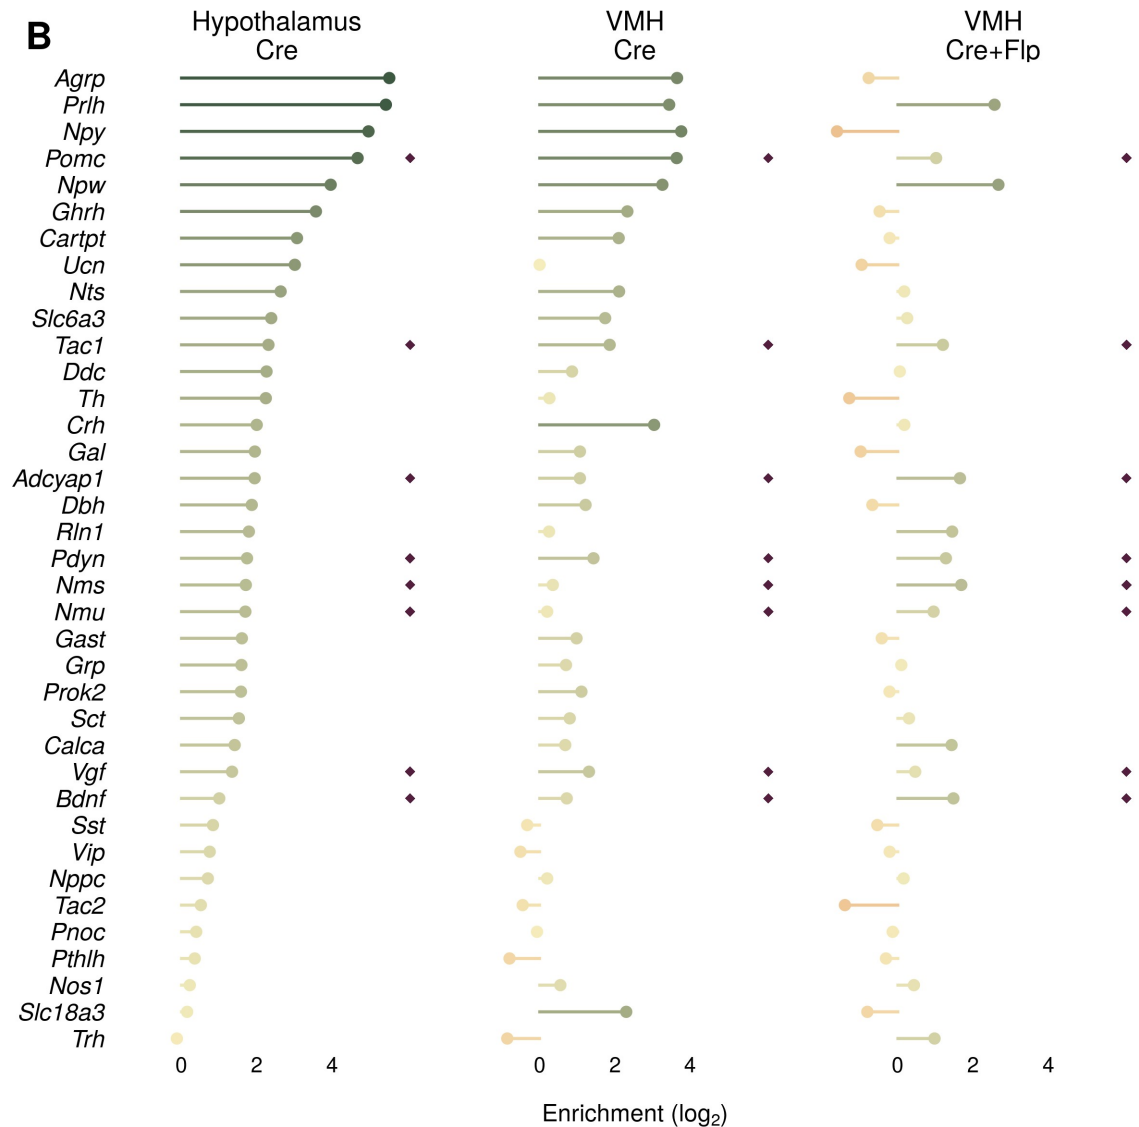

Supplement: supp [file elife-69065-supp-v1.zip › elife_poa_e69065_Figure_3_figure_supplement_1.pdf]

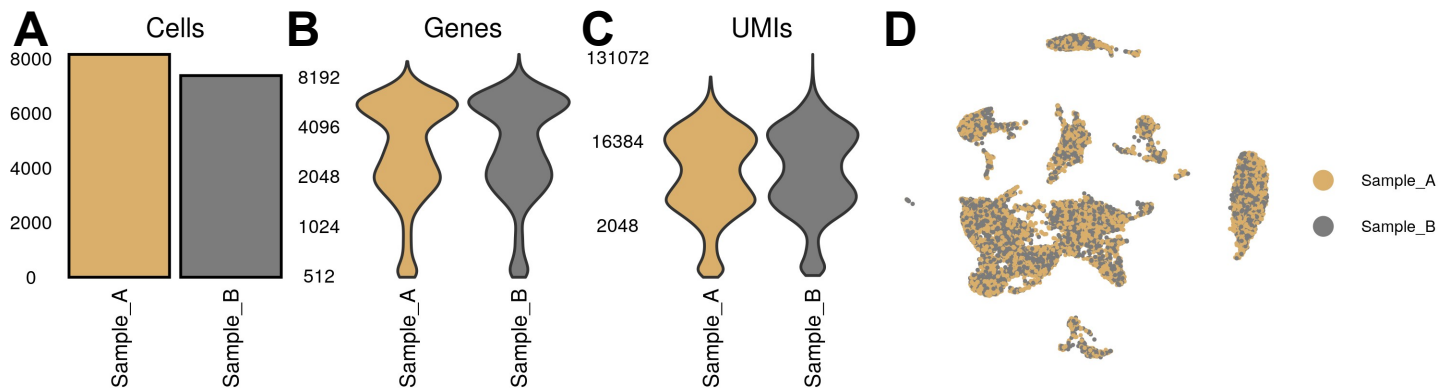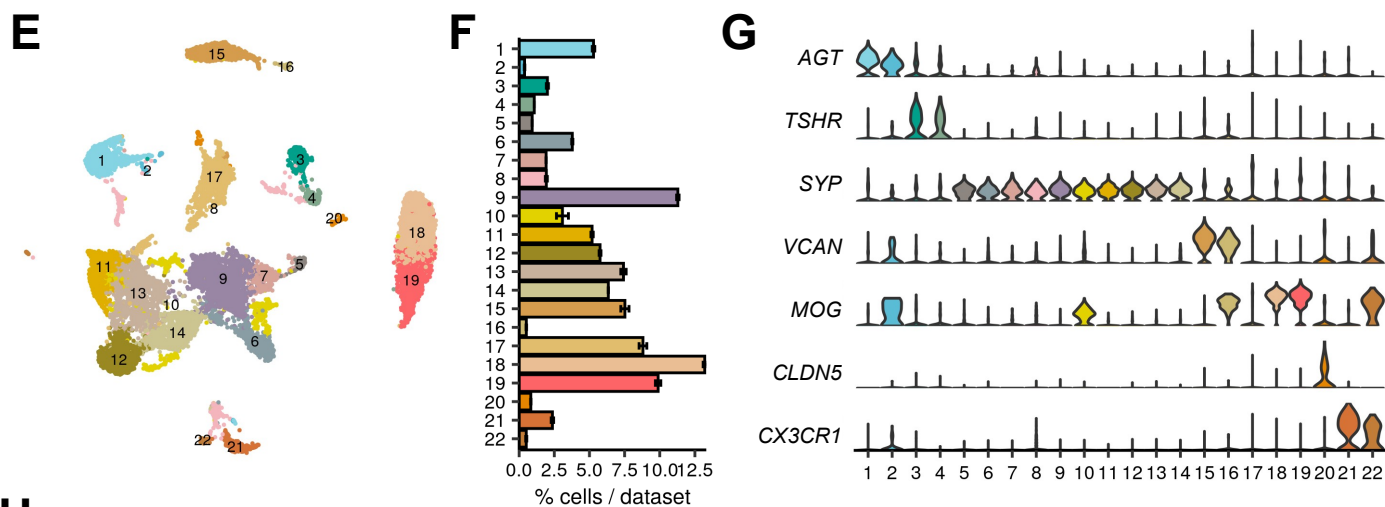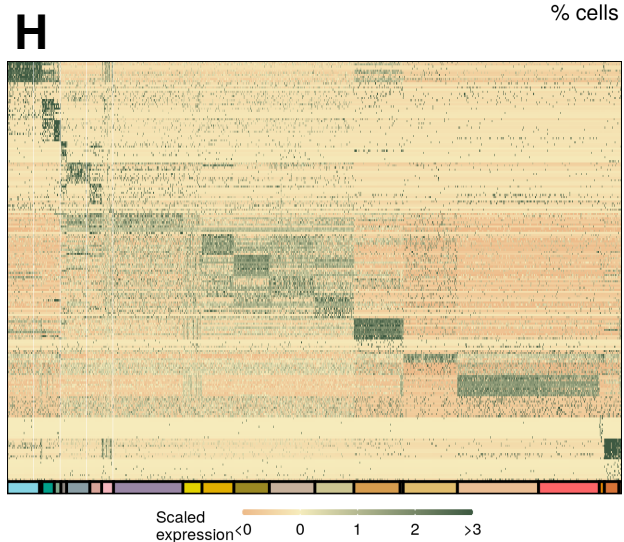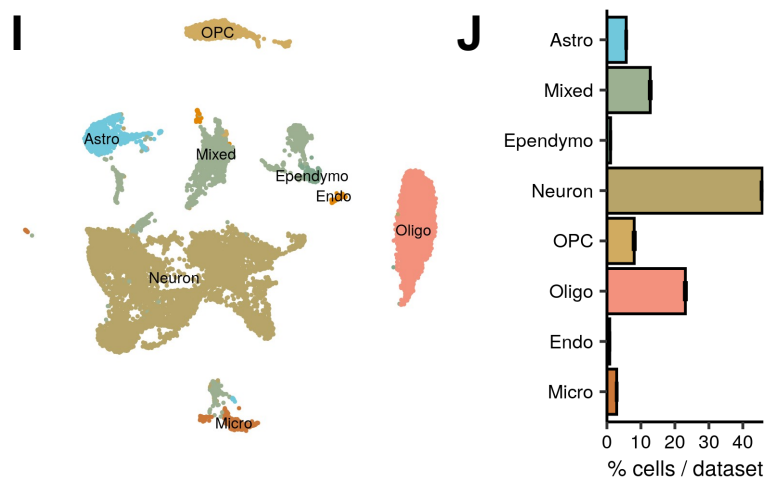

Supplement: supp [file elife-69065-supp-v1.zip › elife_poa_e69065_Figure_4_figure_supplement_1.pdf]

**A**

Neurons  
6,674 nuclei

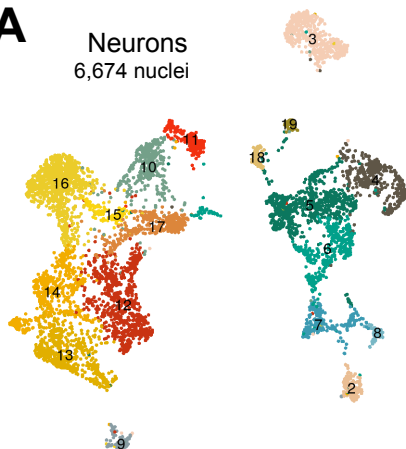**B**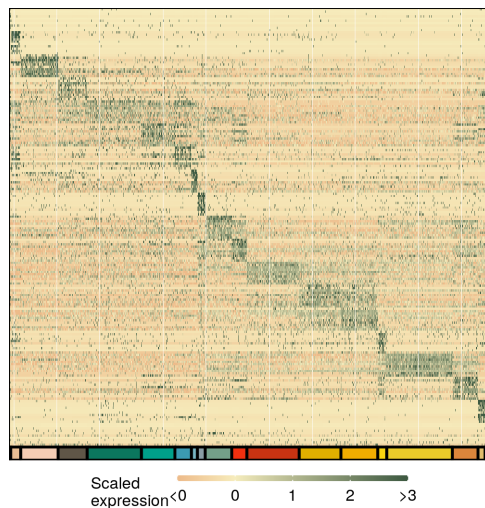**C***FEZF1*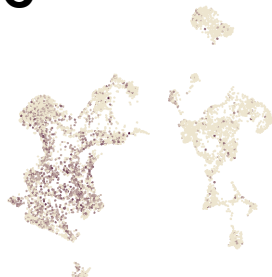**D***NR5A1*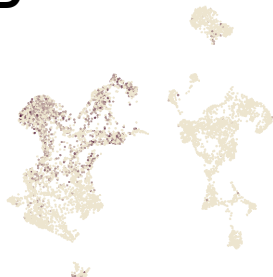**E**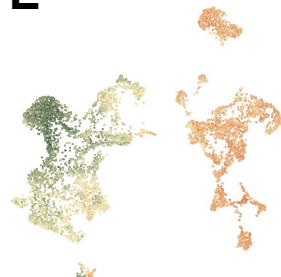

Normalized  
expression 0.0 0.5 1.0 1.5 2.0

TRAP  
loading -4 0 4 8

Supplement: supp [file elife-69065-supp-v1.zip › elife_poa_e69065_Figure_4_figure_supplement_2.pdf]

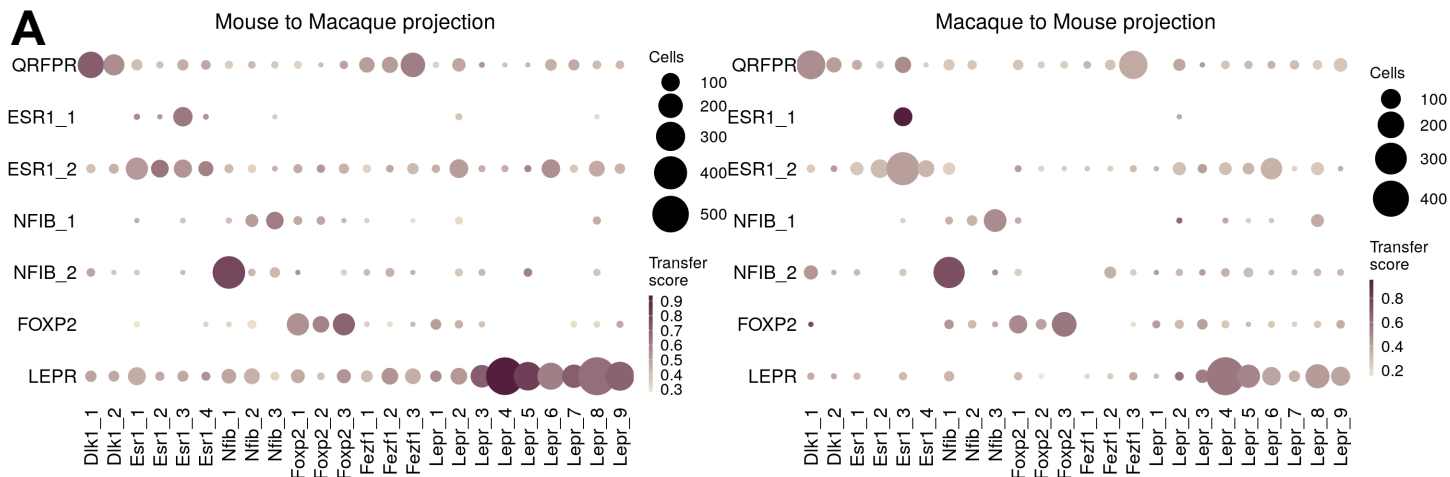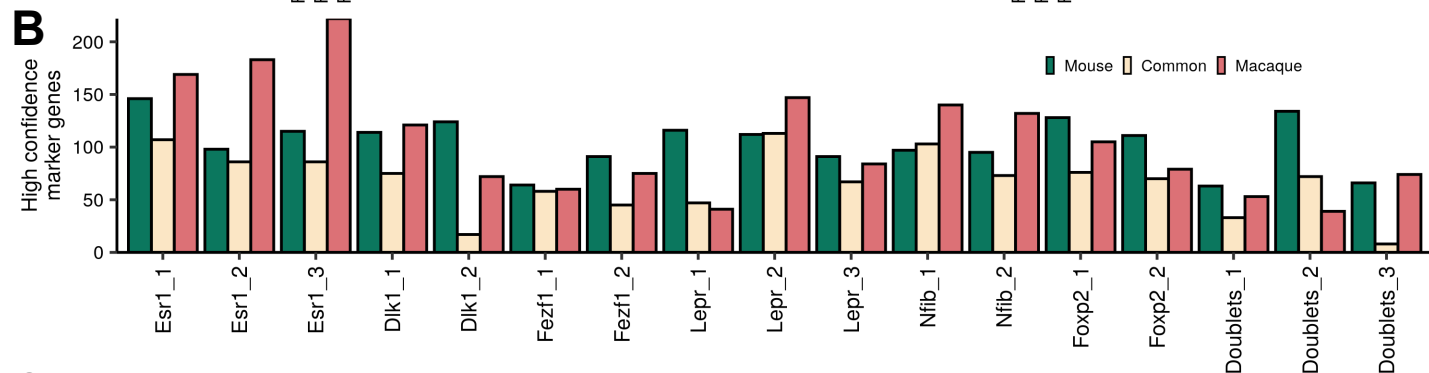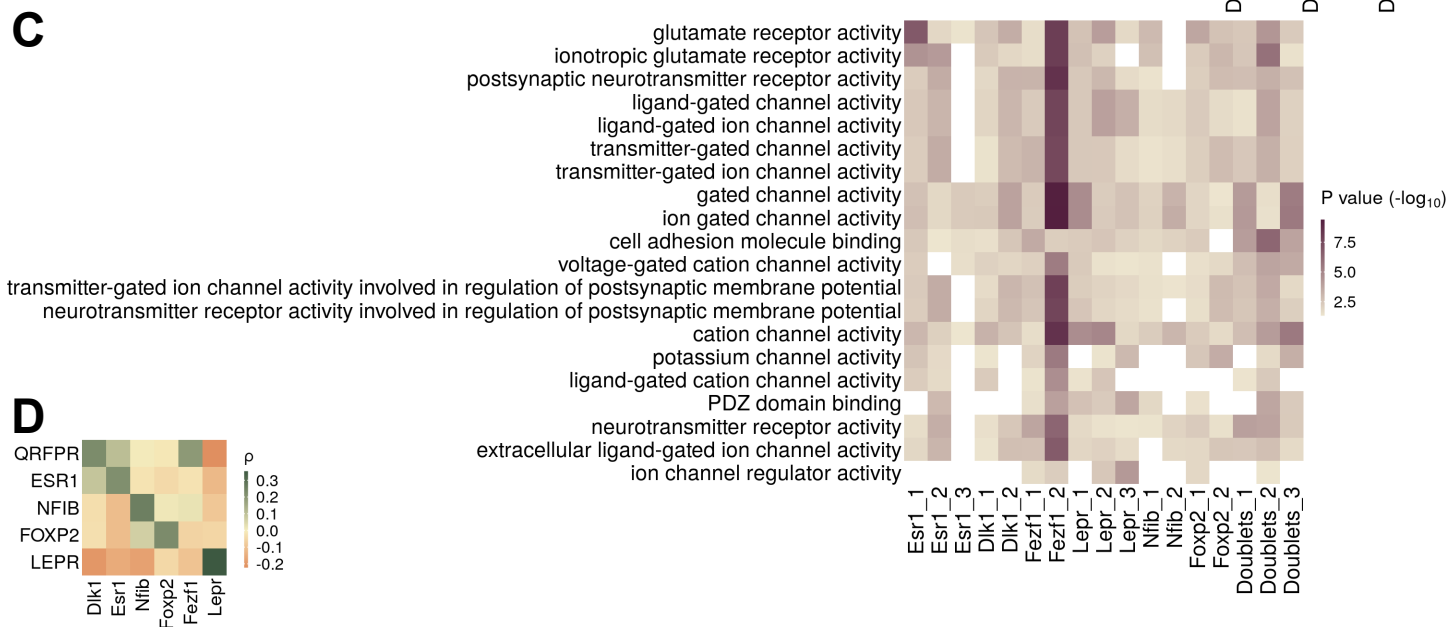

Supplement: supp [file elife-69065-supp-v1.zip › elife_poa_e69065_Figure_5_figure_supplement_1.pdf]

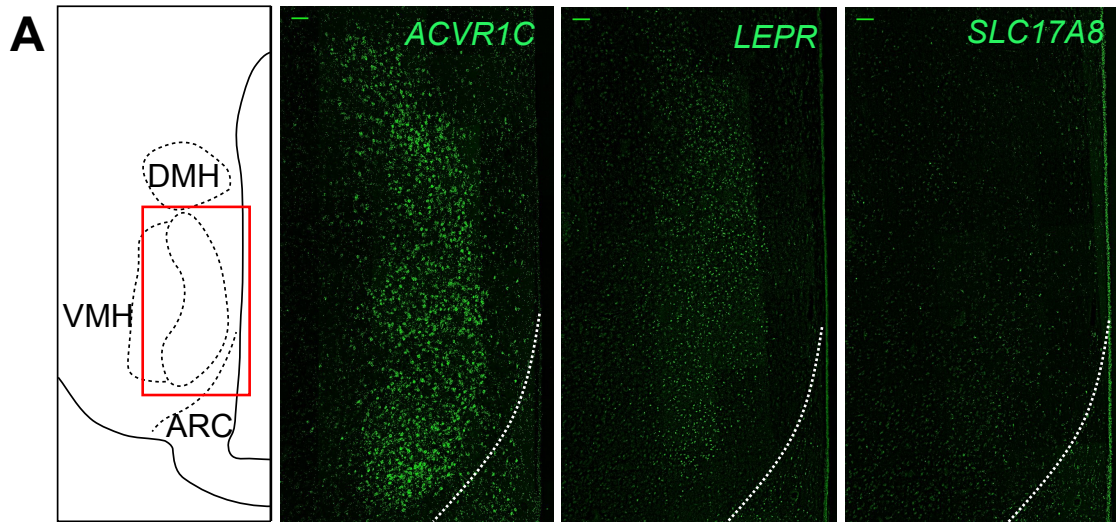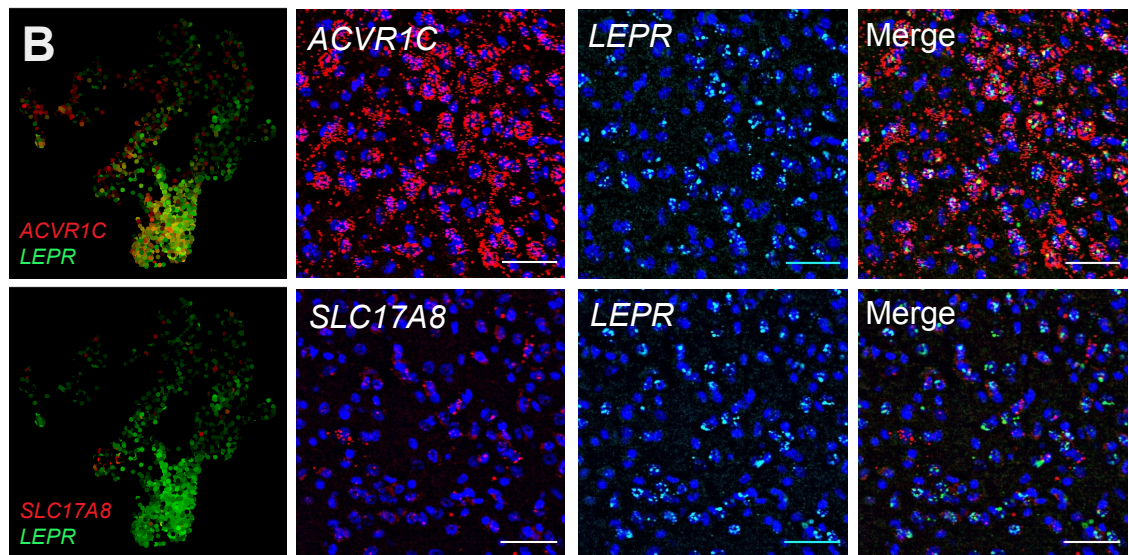

Supplement: supp [file elife-69065-supp-v1.zip › elife_poa_e69065_Figure_5_figure_supplement_2.pdf]
